# Supplementary material
Source: Research Square preprint supplement (doi:10.21203/rs.3.rs-9029043/v1)
Supplement: Supplementary file 1 [file 42aff3f7820cf88001640d58.xlsx]

## Sheet: JSvs.Mock up. FC2
Table S5. Gene Ontology (GO) functional annotation of Nicotiana benthamiana transcriptomes based on InterProScan
Tags	SeqName	SeqName	Description	Length	#Hits	e-Value	sim mean	#GO	GO IDs	GO Names	Enzyme Codes	Enzyme Names	InterPro IDs	InterPro GO IDs	InterPro GO Names	InterPro GO IDs	InterPro GO Names
TRUE	INTERPRO, BLASTED, MAPPED	g32275.t1	hydroxycinnamoyl transferase	485	3	3.7974e-31	41.03	2	F:GO:0016740; F:GO:0016747	F:transferase activity; F:acyltransferase activity, transferring groups other than amino-acyl groups			IPR010541 (PFAM); IPR003480 (PFAM)	F:GO:0016747	F:acyltransferase activity, transferring groups other than amino-acyl groups
TRUE	INTERPRO, NO-BLAST	g25021.t1	---NA---	265									IPR022796 (PFAM)	no GO terms	no GO terms
TRUE	INTERPRO, NO-BLAST	g458.t1	---NA---	245									IPR000868 (PFAM)	P:GO:0008152; F:GO:0003824	P:metabolic process; F:catalytic activity
TRUE	INTERPRO, NO-BLAST	g36275.t1	---NA---	431									IPR025570 (PFAM); IPR000232 (PFAM); IPR007285 (PFAM); IPR016866 (PFAM)	P:GO:0006355; F:GO:0003700; F:GO:0043565; C:GO:0005634	P:regulation of DNA-templated transcription; F:DNA-binding transcription factor activity; F:sequence-specific DNA binding; C:nucleus
TRUE	INTERPRO, NO-BLAST	g23644.t1	---NA---	251									IPR022796 (PFAM)	no GO terms	no GO terms
TRUE	INTERPRO, BLASTED, MAPPED, ANNOTATED	g22515.t1	Aminocyclopropanecarboxylate oxidase	320	6	0	93.52	7	P:GO:0002238; P:GO:0009693; P:GO:0009805; P:GO:0009835; F:GO:0016706; F:GO:0031418; F:GO:0046872	P:response to molecule of fungal origin; P:ethylene biosynthetic process; P:coumarin biosynthetic process; P:fruit ripening; F:2-oxoglutarate-dependent dioxygenase activity; F:L-ascorbic acid binding; F:metal ion binding	EC:1.14.11	Acting on paired donors, with incorporation or reduction of molecular oxygen. The oxygen incorporated need not be derived from O2	IPR026992 (PFAM); IPR005123 (PFAM)	P:GO:0055114; F:GO:0016491	P:obsolete oxidation-reduction process; F:oxidoreductase activity
TRUE	INTERPRO, BLASTED, MAPPED, ANNOTATED	g23594.t1	PDR-type ACB transporter	1433	17	0	82.89	5	P:GO:0055085; F:GO:0005524; F:GO:0016887; F:GO:0140359; C:GO:0016020	P:transmembrane transport; F:ATP binding; F:ATP hydrolysis activity; F:ABC-type transporter activity; C:membrane	EC:7.2.2; EC:3.6.1.15	Catalysing the translocation of inorganic cations; nucleoside-triphosphate phosphatase	IPR003959 (PFAM); IPR003439 (PFAM); IPR004948 (PFAM); IPR013525 (PFAM); IPR003959 (PFAM); IPR013581 (PFAM); IPR029481 (PFAM)	F:GO:0005524; F:GO:0016887; F:GO:0098519; C:GO:0016020	F:ATP binding; F:ATP hydrolysis activity; F:obsolete nucleotide phosphatase activity, acting on free nucleotides; C:membrane
TRUE	INTERPRO, BLASTED, MAPPED, ANNOTATED	g25128.t1	basic helix-loop-helix transcription factor	484	4	1.57717e-10	76.52	1	F:GO:0005488	F:binding			IPR011598 (PFAM)	F:GO:0046983	F:protein dimerization activity
TRUE	INTERPRO, NO-BLAST	g29712.t2	---NA---	265									IPR022796 (PFAM)	no GO terms	no GO terms
TRUE	INTERPRO, BLASTED, MAPPED, ANNOTATED	g23578.t1	5-epi-aristolochene synthase	548	4	0	82.62	4	P:GO:0016102; F:GO:0000287; F:GO:0010333; C:GO:0005737	P:diterpenoid biosynthetic process; F:magnesium ion binding; F:terpene synthase activity; C:cytoplasm	EC:4.2.3	Carbon-oxygen lyases	IPR005187 (PFAM); IPR005630 (PFAM); IPR001906 (PFAM)	P:GO:0008152; F:GO:0000287; F:GO:0010333; F:GO:0016829	P:metabolic process; F:magnesium ion binding; F:terpene synthase activity; F:lyase activity
TRUE	INTERPRO, NO-BLAST	g38359.t1	---NA---	262									IPR022796 (PFAM)	no GO terms	no GO terms
TRUE	INTERPRO, NO-BLAST	g38357.t1	---NA---	267									IPR022796 (PFAM)	no GO terms	no GO terms
TRUE	INTERPRO, NO-BLAST	g2503.t1	---NA---	862									IPR001830 (PFAM); IPR023214 (PFAM); IPR003337 (PFAM); IPR013168 (PFAM)	P:GO:0005992; F:GO:0003824	P:trehalose biosynthetic process; F:catalytic activity
TRUE	INTERPRO, NO-BLAST	g1637.t1	---NA---	257									PF17120 (PFAM); IPR004146 (PFAM); PF12874 (PFAM); IPR025829 (PFAM); IPR019787 (PFAM)	F:GO:0005515	F:protein binding
TRUE	INTERPRO, BLASTED, MAPPED, ANNOTATED	g41306.t1	Potato virus X SL1 RNA interacting protein 2	160	4	9.21952e-09	62.94	1	C:GO:0110165	C:cellular anatomical structure			IPR001623 (PFAM); IPR032683 (PFAM)	no GO terms	no GO terms
TRUE	INTERPRO, NO-BLAST	g29711.t1	---NA---	265									IPR022796 (PFAM)	no GO terms	no GO terms
TRUE	INTERPRO, NO-BLAST	g15747.t1	---NA---	242									no IPS match	no IPS match	no IPS match
TRUE	INTERPRO, NO-BLAST	g26885.t2	---NA---	3750									no IPS match	no IPS match	no IPS match
TRUE	INTERPRO, BLASTED, MAPPED, ANNOTATED	g29050.t1	chloroplast carbonic anhydrase	256	4	1.25523e-129	87.23	6	P:GO:0015976; P:GO:0034599; P:GO:0071244; F:GO:0004089; F:GO:0008270; C:GO:0005737	P:carbon utilization; P:cellular response to oxidative stress; P:cellular response to carbon dioxide; F:carbonate dehydratase activity; F:zinc ion binding; C:cytoplasm	EC:4.2.1.1	carbonic anhydrase	IPR001765 (PFAM)	F:GO:0004089; F:GO:0008270	F:carbonate dehydratase activity; F:zinc ion binding
TRUE	INTERPRO, BLASTED, MAPPED, ANNOTATED	g36830.t1	epoxide hydrolase	311	4	0	77.73	1	F:GO:0033961	F:cis-stilbene-oxide hydrolase activity	EC:3.3.2.9; EC:3.3.2.10	microsomal epoxide hydrolase; soluble epoxide hydrolase	IPR000073 (PFAM)	no GO terms	no GO terms
TRUE	INTERPRO, NO-BLAST	g29950.t1	---NA---	547									IPR023753 (PFAM)	P:GO:0055114; F:GO:0016491	P:obsolete oxidation-reduction process; F:oxidoreductase activity
TRUE	INTERPRO, BLASTED, MAPPED, ANNOTATED	g13539.t1	transcription factor	229	15	3.20885e-29	57.05	1	F:GO:0043565	F:sequence-specific DNA binding			IPR031722 (PFAM); IPR003657 (PFAM); IPR003351 (PFAM)	P:GO:0006355; F:GO:0003700; F:GO:0043565	P:regulation of DNA-templated transcription; F:DNA-binding transcription factor activity; F:sequence-specific DNA binding
TRUE	INTERPRO, BLASTED, MAPPED, ANNOTATED	g7190.t1	ethylene response factor 3	238	7	7.29099e-24	70.57	3	P:GO:0050794; P:GO:0050896; F:GO:0043565	P:regulation of cellular process; P:response to stimulus; F:sequence-specific DNA binding			IPR001471 (PFAM)	P:GO:0006355; F:GO:0003700	P:regulation of DNA-templated transcription; F:DNA-binding transcription factor activity
TRUE	INTERPRO, NO-BLAST	g41023.t1	---NA---	593									IPR013120 (PFAM); IPR033640 (PFAM); IPR001509 (PFAM)	F:GO:0003824; F:GO:0050662	F:catalytic activity; F:obsolete coenzyme binding
TRUE	INTERPRO, NO-BLAST	g29432.t1	---NA---	108									no IPS match	no IPS match	no IPS match
TRUE	INTERPRO, NO-BLAST	g36447.t1	---NA---	198									IPR008889 (PFAM); IPR012569 (PFAM)	no GO terms	no GO terms
TRUE	INTERPRO, NO-BLAST	g23643.t1	---NA---	267									IPR022796 (PFAM)	no GO terms	no GO terms
TRUE	INTERPRO, BLASTED, MAPPED	g43668.t1	SYNV P interacting NAC transcription factor	283	7	1.82701e-49	63.41	3	P:GO:0006355; F:GO:0003677; C:GO:0016020	P:regulation of DNA-templated transcription; F:DNA binding; C:membrane			IPR003441 (PFAM)	P:GO:0006355; F:GO:0003677	P:regulation of DNA-templated transcription; F:DNA binding
TRUE	INTERPRO, NO-BLAST	g11209.t1	---NA---	679									IPR018467 (PFAM); IPR010402 (PFAM); IPR001789 (PFAM)	P:GO:0000160; F:GO:0005515	P:phosphorelay signal transduction system; F:protein binding
TRUE	INTERPRO, NO-BLAST	g26316.t1	---NA---	133									IPR018672 (PFAM); IPR000136 (PFAM); IPR019635 (PFAM)	C:GO:0012511; C:GO:0016020	C:monolayer-surrounded lipid storage body; C:membrane
TRUE	INTERPRO, NO-BLAST	g42187.t1	---NA---	122									IPR024276 (PFAM); IPR031425 (PFAM)	P:GO:0010112	P:regulation of systemic acquired resistance
TRUE	INTERPRO, BLASTED	g29874.t2	auxin repressed protein 1	140	2	1.99069e-56	91.51						IPR008406 (PFAM)	no GO terms	no GO terms
TRUE	INTERPRO, NO-BLAST	g16589.t1	---NA---	146									IPR004320 (PFAM)	no GO terms	no GO terms
TRUE	INTERPRO, BLASTED, MAPPED	g5456.t1	Aminocyclopropanecarboxylate oxidase	336	6	8.58897e-33	51.36	8	P:GO:0002238; P:GO:0009693; P:GO:0009805; P:GO:0009835; F:GO:0016491; F:GO:0016706; F:GO:0031418; F:GO:0046872	P:response to molecule of fungal origin; P:ethylene biosynthetic process; P:coumarin biosynthetic process; P:fruit ripening; F:oxidoreductase activity; F:2-oxoglutarate-dependent dioxygenase activity; F:L-ascorbic acid binding; F:metal ion binding			IPR005123 (PFAM); IPR026992 (PFAM)	P:GO:0055114; F:GO:0016491	P:obsolete oxidation-reduction process; F:oxidoreductase activity
TRUE	INTERPRO, BLASTED, MAPPED, ANNOTATED	g5459.t1	asparagine synthetase	590	3	9.16686e-129	65.19	4	P:GO:0006529; P:GO:0006541; F:GO:0004066; C:GO:0005829	P:asparagine biosynthetic process; P:glutamine metabolic process; F:asparagine synthase (glutamine-hydrolyzing) activity; C:cytosol	EC:6.3.5.4	asparagine synthase (glutamine-hydrolyzing)	IPR017932 (PFAM); IPR001962 (PFAM)	P:GO:0006529; F:GO:0004066	P:asparagine biosynthetic process; F:asparagine synthase (glutamine-hydrolyzing) activity
TRUE	INTERPRO, BLASTED, MAPPED, ANNOTATED	g10258.t1	5-epi-aristolochene synthase	311	4	0	83.39	4	P:GO:0016102; F:GO:0000287; F:GO:0010333; C:GO:0005737	P:diterpenoid biosynthetic process; F:magnesium ion binding; F:terpene synthase activity; C:cytoplasm	EC:4.2.3	Carbon-oxygen lyases	IPR005187 (PFAM); IPR005630 (PFAM)	F:GO:0000287; F:GO:0010333; F:GO:0016829	F:magnesium ion binding; F:terpene synthase activity; F:lyase activity
TRUE	INTERPRO, NO-BLAST	g24753.t1	---NA---	154									no IPS match	no IPS match	no IPS match
TRUE	INTERPRO, BLASTED, MAPPED	g7977.t1	SYNV P interacting NAC transcription factor	239	8	3.91121e-45	58.1	3	P:GO:0006355; F:GO:0003677; C:GO:0016020	P:regulation of DNA-templated transcription; F:DNA binding; C:membrane			IPR003441 (PFAM)	P:GO:0006355; F:GO:0003677	P:regulation of DNA-templated transcription; F:DNA binding
TRUE	INTERPRO, NO-BLAST	g39031.t2	---NA---	231									IPR003425 (PFAM)	C:GO:0016020	C:membrane
TRUE	INTERPRO, NO-BLAST	g2856.t1	---NA---	265									IPR022796 (PFAM)	no GO terms	no GO terms
TRUE	INTERPRO, NO-BLAST	g17430.t1	---NA---	283									no IPS match	no IPS match	no IPS match
TRUE	INTERPRO, NO-BLAST	g21718.t1	---NA---	179									IPR006461 (PFAM)	no GO terms	no GO terms
TRUE	INTERPRO, NO-BLAST	g27442.t1	---NA---	265									IPR022796 (PFAM)	no GO terms	no GO terms
TRUE	INTERPRO, BLASTED, MAPPED, ANNOTATED	g7341.t1	UDP-glycosyltransferase	475	20	0	67.57	1	F:GO:0008194	F:UDP-glycosyltransferase activity	EC:2.4	Glycosyltransferases	IPR031533 (PFAM); IPR007235 (PFAM); IPR025103 (PFAM); IPR002213 (PFAM)	P:GO:0008152; F:GO:0016758	P:metabolic process; F:hexosyltransferase activity
TRUE	INTERPRO, BLASTED, MAPPED, ANNOTATED	g24111.t1	UDP-glycosyltransferase	463	20	0	62.99	3	P:GO:0019761; F:GO:0080043; F:GO:0080044	P:glucosinolate biosynthetic process; F:quercetin 3-O-glucosyltransferase activity; F:quercetin 7-O-glucosyltransferase activity	EC:2.4.1	Glycosyltransferases	IPR004276 (PFAM); IPR002213 (PFAM)	P:GO:0005975; P:GO:0008152; P:GO:0030259; F:GO:0016758	P:carbohydrate metabolic process; P:metabolic process; P:lipid glycosylation; F:hexosyltransferase activity
TRUE	INTERPRO, BLASTED, MAPPED, ANNOTATED	g37612.t1	UDP-glycosyltransferase	453	20	0	61.99	2	F:GO:0080043; F:GO:0080044	F:quercetin 3-O-glucosyltransferase activity; F:quercetin 7-O-glucosyltransferase activity	EC:2.4.1	Glycosyltransferases	IPR015264 (PFAM); IPR002213 (PFAM)	P:GO:0006433; P:GO:0008152; F:GO:0000166; F:GO:0004827; F:GO:0005524; F:GO:0016758; C:GO:0005737	P:prolyl-tRNA aminoacylation; P:metabolic process; F:nucleotide binding; F:proline-tRNA ligase activity; F:ATP binding; F:hexosyltransferase activity; C:cytoplasm
TRUE	INTERPRO, NO-BLAST	g38644.t1	---NA---	370									IPR000490 (PFAM)	P:GO:0005975; F:GO:0004553	P:carbohydrate metabolic process; F:hydrolase activity, hydrolyzing O-glycosyl compounds
TRUE	INTERPRO, NO-BLAST	g23634.t1	---NA---	267									IPR022796 (PFAM)	no GO terms	no GO terms
TRUE	INTERPRO, NO-BLAST	g40525.t1	---NA---	365									IPR000014 (PFAM)	no GO terms	no GO terms
TRUE	INTERPRO, BLASTED, MAPPED, ANNOTATED	g8250.t1	heat shock protein 40	180	10	1.40059e-14	57.09	4	P:GO:0006457; F:GO:0005488; C:GO:0005634; C:GO:0005737	P:protein folding; F:binding; C:nucleus; C:cytoplasm			IPR001623 (PFAM)	no GO terms	no GO terms
TRUE	INTERPRO, NO-BLAST	g5750.t1	---NA---	99									no IPS match	no IPS match	no IPS match
TRUE	INTERPRO, NO-BLAST	g33978.t1	---NA---	170									no IPS match	no IPS match	no IPS match
TRUE	INTERPRO, NO-BLAST	g5617.t1	---NA---	504									IPR007627 (PFAM); IPR000485 (PFAM); IPR007630 (PFAM); IPR007624 (PFAM)	P:GO:0006352; P:GO:0006355; F:GO:0003677; F:GO:0003700; F:GO:0016987; F:GO:0043565	P:DNA-templated transcription initiation; P:regulation of DNA-templated transcription; F:DNA binding; F:DNA-binding transcription factor activity; F:sigma factor activity; F:sequence-specific DNA binding
TRUE	INTERPRO, NO-BLAST	g5341.t1	---NA---	674									IPR025486 (PFAM)	no GO terms	no GO terms
TRUE	INTERPRO, NO-BLAST	g23095.t1	---NA---	614									IPR013534 (PFAM); IPR001296 (PFAM)	no GO terms	no GO terms
TRUE	INTERPRO, BLASTED, MAPPED	g20955.t1	Chain C, Membrane-localized LRR receptor-like protein	649	17	1.55829e-42	50.22	11	P:GO:0006952; P:GO:0050832; P:GO:0051707; P:GO:0098542; F:GO:0004672; F:GO:0004674; F:GO:0005524; F:GO:0016301; F:GO:0016887; F:GO:0043531; C:GO:0016020	P:defense response; P:defense response to fungus; P:response to other organism; P:defense response to other organism; F:protein kinase activity; F:protein serine/threonine kinase activity; F:ATP binding; F:kinase activity; F:ATP hydrolysis activity; F:ADP binding; C:membrane			IPR001611 (PFAM); IPR021720 (PFAM); IPR001611 (PFAM); IPR025875 (PFAM); IPR013585 (PFAM)	F:GO:0005515	F:protein binding
TRUE	INTERPRO, NO-BLAST	g19987.t1	---NA---	265									IPR022796 (PFAM)	no GO terms	no GO terms
TRUE	INTERPRO, NO-BLAST	g11984.t2	---NA---	136									IPR011674 (PFAM)	no GO terms	no GO terms
TRUE	INTERPRO, BLASTED, MAPPED, ANNOTATED	g25740.t1	glutathione transferase	246	4	1.93559e-109	83.85	4	P:GO:0006749; P:GO:0009734; F:GO:0004364; C:GO:0005829	P:glutathione metabolic process; P:auxin-activated signaling pathway; F:glutathione transferase activity; C:cytosol	EC:2.5.1.18	glutathione transferase	IPR004046 (PFAM); IPR004045 (PFAM)	F:GO:0005515	F:protein binding
TRUE	INTERPRO, NO-BLAST	g23635.t1	---NA---	267									IPR022796 (PFAM)	no GO terms	no GO terms
TRUE	INTERPRO, BLASTED	g29874.t1	auxin repressed protein 1	124	2	1.59028e-52	92.82						IPR008406 (PFAM)	no GO terms	no GO terms
TRUE	INTERPRO, NO-BLAST	g39854.t1	---NA---	284									PF13431 (PFAM)	no GO terms	no GO terms
TRUE	INTERPRO, BLASTED, MAPPED	g19712.t1	RPM1-interacting protein 4	228	1	7.64518e-74	66.29	1	C:GO:0005886	C:plasma membrane			IPR008700 (PFAM)	no GO terms	no GO terms
TRUE	INTERPRO, BLASTED, MAPPED, ANNOTATED	g10274.t1	5-epi-aristolochene synthase	548	4	0	82.36	4	P:GO:0016102; F:GO:0000287; F:GO:0010333; C:GO:0005737	P:diterpenoid biosynthetic process; F:magnesium ion binding; F:terpene synthase activity; C:cytoplasm	EC:4.2.3	Carbon-oxygen lyases	IPR005630 (PFAM); IPR001906 (PFAM)	P:GO:0008152; F:GO:0000287; F:GO:0010333; F:GO:0016829	P:metabolic process; F:magnesium ion binding; F:terpene synthase activity; F:lyase activity
TRUE	INTERPRO, NO-BLAST	g8039.t1	---NA---	413									no IPS match	no IPS match	no IPS match
TRUE	INTERPRO	g33449.t1		229									no IPS match	no IPS match	no IPS match
TRUE	INTERPRO, NO-BLAST	g36872.t1	---NA---	167									IPR002109 (PFAM)	P:GO:0045454; F:GO:0009055; F:GO:0015035	P:cell redox homeostasis; F:electron transfer activity; F:protein-disulfide reductase activity
TRUE	INTERPRO	g19273.t1		424									IPR001245 (PFAM)	P:GO:0006468; F:GO:0004672	P:protein phosphorylation; F:protein kinase activity
TRUE	INTERPRO, BLASTED, MAPPED, ANNOTATED	g35861.t1	transcription factor	320	15	1.74938e-28	57.42	4	P:GO:0006355; F:GO:0003700; F:GO:0043565; C:GO:0005634	P:regulation of DNA-templated transcription; F:DNA-binding transcription factor activity; F:sequence-specific DNA binding; C:nucleus			IPR003657 (PFAM)	P:GO:0006355; F:GO:0003700; F:GO:0043565	P:regulation of DNA-templated transcription; F:DNA-binding transcription factor activity; F:sequence-specific DNA binding
TRUE	INTERPRO, NO-BLAST	g29712.t1	---NA---	265									IPR022796 (PFAM)	no GO terms	no GO terms
TRUE	INTERPRO, NO-BLAST	g38106.t1	---NA---	231									IPR022796 (PFAM)	no GO terms	no GO terms
TRUE	INTERPRO, NO-BLAST	g2633.t1	---NA---	64									IPR009424 (PFAM)	no GO terms	no GO terms
TRUE	INTERPRO, BLASTED, MAPPED, ANNOTATED	g23245.t1	Potato virus X SL1 RNA interacting protein 2	190	11	3.26983e-20	68.85	7	P:GO:0042026; P:GO:0061077; F:GO:0030544; F:GO:0046872; F:GO:0051082; C:GO:0005634; C:GO:0005829	P:protein refolding; P:chaperone-mediated protein folding; F:Hsp70 protein binding; F:metal ion binding; F:unfolded protein binding; C:nucleus; C:cytosol			IPR016706 (PFAM); IPR010473 (PFAM); IPR010392 (PFAM); IPR025305 (PFAM); IPR001623 (PFAM); IPR001240 (PFAM)	P:GO:0006378; P:GO:0006568; P:GO:0030036; F:GO:0003729; F:GO:0003779; F:GO:0004640; F:GO:0005198; F:GO:0031267; C:GO:0005849; C:GO:0019028	P:obsolete mRNA polyadenylation; P:tryptophan metabolic process; P:actin cytoskeleton organization; F:mRNA binding; F:actin binding; F:phosphoribosylanthranilate isomerase activity; F:structural molecule activity; F:small GTPase binding; C:mRNA cleavage factor complex; C:viral capsid
TRUE	INTERPRO, BLASTED, MAPPED	g30940.t1	Potato virus X SL1 RNA interacting protein 2	160	10	1.1206e-07	61.43	16	P:GO:0006457; P:GO:0009408; P:GO:0042026; P:GO:0051085; P:GO:0061077; F:GO:0005524; F:GO:0030544; F:GO:0046872; F:GO:0051082; F:GO:0051087; C:GO:0005634; C:GO:0005737; C:GO:0005788; C:GO:0005829; C:GO:0009507; C:GO:0016020	P:protein folding; P:response to heat; P:protein refolding; P:chaperone cofactor-dependent protein refolding; P:chaperone-mediated protein folding; F:ATP binding; F:Hsp70 protein binding; F:metal ion binding; F:unfolded protein binding; F:protein-folding chaperone binding; C:nucleus; C:cytoplasm; C:endoplasmic reticulum lumen; C:cytosol; C:chloroplast; C:membrane			IPR032683 (PFAM); IPR001623 (PFAM)	no GO terms	no GO terms
TRUE	INTERPRO, NO-BLAST	g36947.t1	---NA---	602									IPR001789 (PFAM); IPR010402 (PFAM)	P:GO:0000160; F:GO:0005515	P:phosphorelay signal transduction system; F:protein binding
TRUE	INTERPRO, NO-BLAST	g18831.t1	---NA---	294									IPR022796 (PFAM)	no GO terms	no GO terms
TRUE	INTERPRO, NO-BLAST	g32117.t1	---NA---	356									IPR012442 (PFAM)	no GO terms	no GO terms
TRUE	INTERPRO, BLASTED, MAPPED, ANNOTATED	g15416.t1	clade XI lectin receptor kinase	806	20	2.29428e-121	57.55	1	F:GO:0016301	F:kinase activity	EC:2.7	Transferring phosphorus-containing groups	IPR021820 (PFAM); IPR000719 (PFAM); IPR001480 (PFAM); IPR003609 (PFAM); IPR000858 (PFAM)	P:GO:0006468; P:GO:0048544; F:GO:0004672; F:GO:0004674; F:GO:0005524	P:protein phosphorylation; P:recognition of pollen; F:protein kinase activity; F:protein serine/threonine kinase activity; F:ATP binding
TRUE	INTERPRO, NO-BLAST	g23985.t1	---NA---	291									IPR003441 (PFAM)	P:GO:0006355; F:GO:0003677	P:regulation of DNA-templated transcription; F:DNA binding
TRUE	INTERPRO, NO-BLAST	g27863.t1	---NA---	694									IPR002655 (PFAM); IPR006091 (PFAM); IPR013786 (PFAM); IPR009075 (PFAM)	P:GO:0006635; P:GO:0008152; P:GO:0055114; F:GO:0003995; F:GO:0003997; F:GO:0016627; F:GO:0050660; C:GO:0005777	P:fatty acid beta-oxidation; P:metabolic process; P:obsolete oxidation-reduction process; F:acyl-CoA dehydrogenase activity; F:acyl-CoA oxidase activity; F:oxidoreductase activity, acting on the CH-CH group of donors; F:flavin adenine dinucleotide binding; C:peroxisome
TRUE	INTERPRO, NO-BLAST	g35141.t1	---NA---	135									no IPS match	no IPS match	no IPS match
TRUE	INTERPRO, NO-BLAST	g4536.t1	---NA---	598									IPR001789 (PFAM); IPR010402 (PFAM)	P:GO:0000160; F:GO:0005515	P:phosphorelay signal transduction system; F:protein binding
TRUE	INTERPRO, NO-BLAST	g44954.t1	---NA---	179									IPR006461 (PFAM)	no GO terms	no GO terms
TRUE	INTERPRO, NO-BLAST	g8955.t1	---NA---	94									IPR006476 (PFAM); IPR009587 (PFAM); IPR020683 (PFAM)	no GO terms	no GO terms
TRUE	INTERPRO, NO-BLAST	g22769.t2	---NA---	824									IPR006047 (PFAM); IPR006048 (PFAM); IPR004193 (PFAM)	P:GO:0005975; F:GO:0003824; F:GO:0004553; F:GO:0043169	P:carbohydrate metabolic process; F:catalytic activity; F:hydrolase activity, hydrolyzing O-glycosyl compounds; F:cation binding
TRUE	INTERPRO, NO-BLAST	g1933.t1	---NA---	1620									IPR011124 (PFAM)	F:GO:0008270	F:zinc ion binding
TRUE	INTERPRO, NO-BLAST	g29761.t1	---NA---	187									IPR000477 (PFAM)	no GO terms	no GO terms
TRUE	INTERPRO, BLASTED, MAPPED	g34563.t1	SYNV P interacting NAC transcription factor	283	8	8.55427e-71	65.62	3	P:GO:0006355; F:GO:0003677; C:GO:0016020	P:regulation of DNA-templated transcription; F:DNA binding; C:membrane			IPR003441 (PFAM)	P:GO:0006355; F:GO:0003677	P:regulation of DNA-templated transcription; F:DNA binding
TRUE	INTERPRO, NO-BLAST	g9116.t1	---NA---	259									IPR003201 (PFAM); IPR021989 (PFAM)	F:GO:0008013; C:GO:0016592	F:beta-catenin binding; C:mediator complex
TRUE	INTERPRO, BLASTED, MAPPED	g30260.t1	oresara 1-like protein	323	8	6.04404e-108	64.75	3	P:GO:0006355; F:GO:0003677; C:GO:0016020	P:regulation of DNA-templated transcription; F:DNA binding; C:membrane			IPR003441 (PFAM)	P:GO:0006355; F:GO:0003677	P:regulation of DNA-templated transcription; F:DNA binding
TRUE	INTERPRO, NO-BLAST	g31640.t1	---NA---	680									IPR001789 (PFAM); IPR010402 (PFAM)	P:GO:0000160; F:GO:0005515	P:phosphorelay signal transduction system; F:protein binding
TRUE	INTERPRO, BLASTED, MAPPED	g31498.t1	S-adenosylmethionine transporter	368	1	5.22833e-05	42.67	7	P:GO:0055085; P:GO:1901962; F:GO:0000095; C:GO:0005739; C:GO:0005743; C:GO:0009941; C:GO:0016020	P:transmembrane transport; P:S-adenosyl-L-methionine transmembrane transport; F:S-adenosyl-L-methionine transmembrane transporter activity; C:mitochondrion; C:mitochondrial inner membrane; C:chloroplast envelope; C:membrane			IPR018108 (PFAM)	no GO terms	no GO terms
TRUE	INTERPRO, BLASTED, MAPPED	g235.t2	poly-A binding protein	412	1	0.000815383	41.41	8	F:GO:0003723; F:GO:0003730; F:GO:0008143; F:GO:0008266; C:GO:0005634; C:GO:0005737; C:GO:0005829; C:GO:1990904	F:RNA binding; F:mRNA 3'-UTR binding; F:poly(A) binding; F:poly(U) RNA binding; C:nucleus; C:cytoplasm; C:cytosol; C:ribonucleoprotein complex			IPR009818 (PFAM); IPR004959 (PFAM); IPR000504 (PFAM); IPR021936 (PFAM); IPR006630 (PFAM); IPR024582 (PFAM)	P:GO:0009405; F:GO:0003676	P:obsolete pathogenesis; F:nucleic acid binding
TRUE	INTERPRO, NO-BLAST	g28738.t1	---NA---	327									IPR004873 (PFAM)	no GO terms	no GO terms
TRUE	INTERPRO, BLASTED, MAPPED, ANNOTATED	g25604.t1	pathogenesis-related protein PR-10	160	2	2.51335e-75	71.4	7	P:GO:0006952; P:GO:0009738; F:GO:0004864; F:GO:0010427; F:GO:0038023; C:GO:0005634; C:GO:0005737	P:defense response; P:abscisic acid-activated signaling pathway; F:protein phosphatase inhibitor activity; F:abscisic acid binding; F:signaling receptor activity; C:nucleus; C:cytoplasm			IPR000916 (PFAM)	P:GO:0006952; P:GO:0009607	P:defense response; P:response to biotic stimulus
TRUE	INTERPRO, NO-BLAST	g14967.t1	---NA---	140									no IPS match	no IPS match	no IPS match
TRUE	INTERPRO, BLASTED, MAPPED, ANNOTATED	g17145.t1	transcription factor	186	15	2.14127e-32	71.95	4	P:GO:0006355; F:GO:0003700; F:GO:0043565; C:GO:0005634	P:regulation of DNA-templated transcription; F:DNA-binding transcription factor activity; F:sequence-specific DNA binding; C:nucleus			IPR003657 (PFAM)	P:GO:0006355; F:GO:0003700; F:GO:0043565	P:regulation of DNA-templated transcription; F:DNA-binding transcription factor activity; F:sequence-specific DNA binding
TRUE	INTERPRO, NO-BLAST	g35712.t1	---NA---	394									IPR003099 (PFAM); IPR008040 (PFAM); IPR006176 (PFAM)	P:GO:0006571; P:GO:0006631; P:GO:0055114; F:GO:0003857; F:GO:0004665; F:GO:0008977; F:GO:0016491	P:tyrosine biosynthetic process; P:fatty acid metabolic process; P:obsolete oxidation-reduction process; F:3-hydroxyacyl-CoA dehydrogenase activity; F:prephenate dehydrogenase (NADP+) activity; F:prephenate dehydrogenase (NAD+) activity; F:oxidoreductase activity
TRUE	INTERPRO, BLASTED, MAPPED	g6075.t1	nicotine N-demethylase	478	3	4.71694e-07	49.65	9	P:GO:0032259; F:GO:0004497; F:GO:0004796; F:GO:0005506; F:GO:0008168; F:GO:0016705; F:GO:0020037; F:GO:0046872; C:GO:0016020	P:methylation; F:monooxygenase activity; F:thromboxane-A synthase activity; F:iron ion binding; F:methyltransferase activity; F:oxidoreductase activity, acting on paired donors, with incorporation or reduction of molecular oxygen; F:heme binding; F:metal ion binding; C:membrane			IPR001128 (PFAM)	P:GO:0055114; F:GO:0005506; F:GO:0016705; F:GO:0020037	P:obsolete oxidation-reduction process; F:iron ion binding; F:oxidoreductase activity, acting on paired donors, with incorporation or reduction of molecular oxygen; F:heme binding
TRUE	INTERPRO, NO-BLAST	g10938.t1	---NA---	203									IPR002044 (PFAM); IPR018466 (PFAM); IPR016605 (PFAM)	P:GO:0010167; P:GO:0015706; F:GO:2001070	P:response to nitrate; P:nitrate transmembrane transport; F:starch binding
TRUE	INTERPRO, NO-BLAST	g37556.t1	---NA---	100									no IPS match	no IPS match	no IPS match
TRUE	INTERPRO, BLASTED, MAPPED, ANNOTATED	g34557.t2	clade VIII lectin receptor kinase	476	20	4.47009e-120	60.42	4	F:GO:0004674; F:GO:0004713; F:GO:0005524; C:GO:0005886	F:protein serine/threonine kinase activity; F:protein tyrosine kinase activity; F:ATP binding; C:plasma membrane	EC:2.7.10; EC:2.7.11.1	Transferring phosphorus-containing groups; non-specific serine/threonine protein kinase	IPR001245 (PFAM)	P:GO:0006468; F:GO:0004672	P:protein phosphorylation; F:protein kinase activity
TRUE	INTERPRO, NO-BLAST	g10445.t1	---NA---	115									IPR019631 (PFAM); IPR004209 (PFAM); IPR016140 (PFAM)	P:GO:0055114; F:GO:0016730	P:obsolete oxidation-reduction process; F:oxidoreductase activity, acting on iron-sulfur proteins as donors
TRUE	INTERPRO, NO-BLAST	g16797.t1	---NA---	412									IPR002912 (PFAM); IPR002912 (PFAM)	P:GO:0008152; F:GO:0016597	P:metabolic process; F:amino acid binding
TRUE	INTERPRO, NO-BLAST	g41760.t1	---NA---	515									IPR003851 (PFAM)	P:GO:0006355; F:GO:0003677	P:regulation of DNA-templated transcription; F:DNA binding
TRUE	INTERPRO, NO-BLAST	g17947.t1	---NA---	342									IPR000490 (PFAM)	P:GO:0005975; F:GO:0004553	P:carbohydrate metabolic process; F:hydrolase activity, hydrolyzing O-glycosyl compounds
TRUE	INTERPRO, NO-BLAST	g235.t1	---NA---	373									IPR021936 (PFAM); IPR009818 (PFAM); IPR006630 (PFAM); IPR004959 (PFAM)	P:GO:0009405	P:obsolete pathogenesis
TRUE	INTERPRO, NO-BLAST	g46169.t1	---NA---	1510									IPR000477 (PFAM); IPR001584 (PFAM); PF13975 (PFAM); IPR006924 (PFAM); IPR015416 (PFAM); IPR018061 (PFAM); IPR032422 (PFAM); IPR005162 (PFAM); IPR023780 (PFAM)	P:GO:0006412; P:GO:0015074; F:GO:0003735; C:GO:0005840	P:translation; P:DNA integration; F:structural constituent of ribosome; C:ribosome
TRUE	INTERPRO, BLASTED, MAPPED, ANNOTATED	g33212.t1	Aminocyclopropanecarboxylate oxidase	299	6	0	92.31	7	P:GO:0002238; P:GO:0009693; P:GO:0009805; P:GO:0009835; F:GO:0016706; F:GO:0031418; F:GO:0046872	P:response to molecule of fungal origin; P:ethylene biosynthetic process; P:coumarin biosynthetic process; P:fruit ripening; F:2-oxoglutarate-dependent dioxygenase activity; F:L-ascorbic acid binding; F:metal ion binding	EC:1.14.11	Acting on paired donors, with incorporation or reduction of molecular oxygen. The oxygen incorporated need not be derived from O2	IPR026992 (PFAM); IPR021812 (PFAM); IPR005123 (PFAM)	P:GO:0055114; F:GO:0016491	P:obsolete oxidation-reduction process; F:oxidoreductase activity
TRUE	INTERPRO, NO-BLAST	g32889.t1	---NA---	178									IPR006461 (PFAM)	no GO terms	no GO terms
TRUE	INTERPRO, NO-BLAST	g15151.t1	---NA---	332									IPR001258 (PFAM); IPR008557 (PFAM); IPR018119 (PFAM); IPR013658 (PFAM)	P:GO:0009058; F:GO:0005515; F:GO:0016844	P:biosynthetic process; F:protein binding; F:strictosidine synthase activity
TRUE	INTERPRO, NO-BLAST	g1065.t1	---NA---	1510									IPR001584 (PFAM); IPR005162 (PFAM); PF13975 (PFAM); IPR000477 (PFAM); IPR015416 (PFAM); IPR009579 (PFAM); IPR023780 (PFAM); IPR018061 (PFAM); IPR032422 (PFAM); IPR006924 (PFAM)	P:GO:0006412; P:GO:0015074; F:GO:0003735; C:GO:0005840	P:translation; P:DNA integration; F:structural constituent of ribosome; C:ribosome
TRUE	INTERPRO, BLASTED, MAPPED, ANNOTATED	g31.t1	cysteine-rich venom protein	179	2	1.75668e-137	91.72	1	C:GO:0005615	C:extracellular space			IPR014044 (PFAM)	no GO terms	no GO terms
TRUE	INTERPRO, NO-BLAST	g35652.t1	---NA---	493									PF13540 (PFAM); IPR000408 (PFAM)	no GO terms	no GO terms
TRUE	INTERPRO, NO-BLAST	g12575.t1	---NA---	383									IPR000315 (PFAM); IPR010402 (PFAM)	F:GO:0005515; F:GO:0008270; C:GO:0005622	F:protein binding; F:zinc ion binding; C:intracellular anatomical structure
TRUE	INTERPRO, BLASTED, MAPPED	g24953.t1	hydroxycinnamoyl transferase	460	3	3.12146e-41	44.58	2	F:GO:0016740; F:GO:0016747	F:transferase activity; F:acyltransferase activity, transferring groups other than amino-acyl groups			IPR003480 (PFAM)	F:GO:0016747	F:acyltransferase activity, transferring groups other than amino-acyl groups
TRUE	INTERPRO, NO-BLAST	g8124.t1	---NA---	427									IPR002641 (PFAM)	P:GO:0006629	P:lipid metabolic process
TRUE	INTERPRO, NO-BLAST	g14514.t1	---NA---	122									no IPS match	no IPS match	no IPS match
TRUE	INTERPRO, NO-BLAST	g30795.t1	---NA---	326									IPR005333 (PFAM); IPR024621 (PFAM)	P:GO:0032979; C:GO:0005743	P:protein insertion into mitochondrial inner membrane from matrix; C:mitochondrial inner membrane
TRUE	INTERPRO, BLASTED, MAPPED	g19712.t2	RPM1-interacting protein 4	229	1	4.69778e-72	66.04	1	C:GO:0005886	C:plasma membrane			IPR008700 (PFAM)	no GO terms	no GO terms
TRUE	INTERPRO, BLASTED, MAPPED	g44303.t1	monothiol glutaredoxin-S15, mitochondrial	102	2	2.94791e-07	51.71	4	F:GO:0046872; F:GO:0051536; C:GO:0005739; C:GO:0005759	F:metal ion binding; F:iron-sulfur cluster binding; C:mitochondrion; C:mitochondrial matrix			IPR015093 (PFAM); IPR002109 (PFAM)	P:GO:0045454; F:GO:0009055; F:GO:0015035	P:cell redox homeostasis; F:electron transfer activity; F:protein-disulfide reductase activity
TRUE	INTERPRO, NO-BLAST	g18614.t1	---NA---	244									IPR009252 (PFAM); IPR000232 (PFAM); IPR008474 (PFAM)	P:GO:0006355; P:GO:0043093; P:GO:0090529; F:GO:0003700; F:GO:0043565; C:GO:0005634; C:GO:0005737	P:regulation of DNA-templated transcription; P:FtsZ-dependent cytokinesis; P:cell septum assembly; F:DNA-binding transcription factor activity; F:sequence-specific DNA binding; C:nucleus; C:cytoplasm
TRUE	INTERPRO, NO-BLAST	g15527.t1	---NA---	915									PF14223 (PFAM); IPR001878 (PFAM); IPR025724 (PFAM); IPR013103 (PFAM); IPR001584 (PFAM)	P:GO:0015074; F:GO:0003676; F:GO:0008270	P:DNA integration; F:nucleic acid binding; F:zinc ion binding
TRUE	INTERPRO, BLASTED, MAPPED, ANNOTATED	g42999.t1	glutathione transferase	221	4	3.23606e-94	79.66	4	P:GO:0006749; P:GO:0009734; F:GO:0004364; C:GO:0005829	P:glutathione metabolic process; P:auxin-activated signaling pathway; F:glutathione transferase activity; C:cytosol	EC:2.5.1.18	glutathione transferase	IPR004045 (PFAM); IPR004046 (PFAM)	F:GO:0005515	F:protein binding
TRUE	INTERPRO, NO-BLAST	g15915.t1	---NA---	400									IPR000477 (PFAM)	no GO terms	no GO terms
TRUE	INTERPRO, NO-BLAST	g6003.t1	---NA---	1362									IPR025724 (PFAM); IPR013103 (PFAM); IPR001878 (PFAM); PF14223 (PFAM); IPR001584 (PFAM)	P:GO:0015074; F:GO:0003676; F:GO:0008270	P:DNA integration; F:nucleic acid binding; F:zinc ion binding
TRUE	INTERPRO, NO-BLAST	g15620.t1	---NA---	510									no IPS match	no IPS match	no IPS match
TRUE	INTERPRO, NO-BLAST	g34727.t1	---NA---	896									IPR005135 (PFAM); IPR000477 (PFAM)	no GO terms	no GO terms
TRUE	INTERPRO, NO-BLAST	g1812.t2	---NA---	647									no IPS match	no IPS match	no IPS match
TRUE	INTERPRO, BLASTED, MAPPED, ANNOTATED	g26058.t1	glutathione S-transferase U1	219	4	2.05976e-66	75.24	4	P:GO:0006749; P:GO:0009734; F:GO:0004364; C:GO:0005829	P:glutathione metabolic process; P:auxin-activated signaling pathway; F:glutathione transferase activity; C:cytosol	EC:2.5.1.18	glutathione transferase	IPR004046 (PFAM); IPR004233 (PFAM); IPR004045 (PFAM)	P:GO:0009307; F:GO:0003677; F:GO:0005515; F:GO:0009036	P:DNA restriction-modification system; F:DNA binding; F:protein binding; F:type II site-specific deoxyribonuclease activity
TRUE	INTERPRO, BLASTED, MAPPED, ANNOTATED	g4524.t1	5-epi-aristolochene synthase	548	4	0	82.07	4	P:GO:0016102; F:GO:0000287; F:GO:0010333; C:GO:0005737	P:diterpenoid biosynthetic process; F:magnesium ion binding; F:terpene synthase activity; C:cytoplasm	EC:4.2.3	Carbon-oxygen lyases	IPR001906 (PFAM); IPR005630 (PFAM); IPR005187 (PFAM)	P:GO:0008152; F:GO:0000287; F:GO:0010333; F:GO:0016829	P:metabolic process; F:magnesium ion binding; F:terpene synthase activity; F:lyase activity
TRUE	INTERPRO, NO-BLAST	g22309.t1	---NA---	462									IPR001810 (PFAM)	F:GO:0005515	F:protein binding
TRUE	INTERPRO, NO-BLAST	g22955.t1	---NA---	156									no IPS match	no IPS match	no IPS match
TRUE	INTERPRO, NO-BLAST	g9503.t1	---NA---	201									IPR019392 (PFAM)	P:GO:0008053	P:mitochondrial fusion
TRUE	INTERPRO, NO-BLAST	g2407.t1	---NA---	84									IPR008733 (PFAM)	P:GO:0016559; C:GO:0005779	P:peroxisome fission; C:obsolete integral component of peroxisomal membrane
TRUE	INTERPRO, NO-BLAST	g19804.t1	---NA---	488									IPR003851 (PFAM)	P:GO:0006355; F:GO:0003677	P:regulation of DNA-templated transcription; F:DNA binding
TRUE	INTERPRO, NO-BLAST	g10921.t1	---NA---	238									IPR010617 (PFAM); IPR013130 (PFAM)	F:GO:0005267	F:potassium channel activity
TRUE	INTERPRO, NO-BLAST	g9849.t1	---NA---	865									IPR000477 (PFAM); IPR005135 (PFAM)	no GO terms	no GO terms
TRUE	INTERPRO, NO-BLAST	g16476.t1	---NA---	247									IPR007383 (PFAM); IPR015896 (PFAM); IPR006708 (PFAM)	P:GO:0033014; P:GO:0055114; F:GO:0008883; F:GO:0050661; C:GO:0005777	P:tetrapyrrole biosynthetic process; P:obsolete oxidation-reduction process; F:glutamyl-tRNA reductase activity; F:NADP binding; C:peroxisome
TRUE	INTERPRO, NO-BLAST	g40427.t1	---NA---	177									IPR006702 (PFAM)	no GO terms	no GO terms
TRUE	INTERPRO, BLASTED, MAPPED	g44676.t2	RPM1-interacting protein 4	229	1	8.57666e-80	65.67	1	C:GO:0005886	C:plasma membrane			IPR008700 (PFAM)	no GO terms	no GO terms
TRUE	INTERPRO, NO-BLAST	g1968.t1	---NA---	866									IPR000477 (PFAM); IPR005135 (PFAM)	no GO terms	no GO terms
TRUE	INTERPRO, BLASTED, MAPPED, ANNOTATED	g26766.t1	non-cell-autonomous protein pathway	357	1	0	99.72	4	P:GO:0006006; P:GO:0033499; F:GO:0004034; F:GO:0030246	P:glucose metabolic process; P:galactose catabolic process via UDP-galactose; F:aldose 1-epimerase activity; F:carbohydrate binding	EC:5.1.3.3	aldose 1-epimerase	IPR008183 (PFAM)	P:GO:0005975; F:GO:0016853	P:carbohydrate metabolic process; F:isomerase activity
TRUE	INTERPRO, NO-BLAST	g44886.t1	---NA---	499									IPR012484 (PFAM); PF05834 (PFAM)	F:GO:0046870	F:cadmium ion binding
TRUE	INTERPRO, NO-BLAST	g6151.t2	---NA---	671									no IPS match	no IPS match	no IPS match
TRUE	INTERPRO, NO-BLAST	g11310.t1	---NA---	518									IPR007630 (PFAM); IPR007624 (PFAM); IPR007627 (PFAM)	P:GO:0006352; P:GO:0006355; F:GO:0003677; F:GO:0003700; F:GO:0016987	P:DNA-templated transcription initiation; P:regulation of DNA-templated transcription; F:DNA binding; F:DNA-binding transcription factor activity; F:sigma factor activity
TRUE	INTERPRO, NO-BLAST	g16704.t1	---NA---	404									IPR002641 (PFAM)	P:GO:0006629	P:lipid metabolic process
TRUE	INTERPRO, NO-BLAST	g43779.t2	---NA---	509									IPR031558 (PFAM); IPR004181 (PFAM); IPR007071 (PFAM); IPR004345 (PFAM); IPR022755 (PFAM); PF12874 (PFAM)	F:GO:0003677; F:GO:0008270; C:GO:0005634	F:DNA binding; F:zinc ion binding; C:nucleus
TRUE	INTERPRO, NO-BLAST	g35396.t1	---NA---	225									IPR007455 (PFAM); IPR008889 (PFAM)	no GO terms	no GO terms
TRUE	INTERPRO, NO-BLAST	g23994.t1	---NA---	114									PF13410 (PFAM)	no GO terms	no GO terms
TRUE	INTERPRO, NO-BLAST	g36601.t1	---NA---	967									IPR005135 (PFAM); IPR000477 (PFAM)	no GO terms	no GO terms
TRUE	INTERPRO, NO-BLAST	g34596.t1	---NA---	1004									IPR005135 (PFAM); IPR000477 (PFAM)	no GO terms	no GO terms
TRUE	INTERPRO, NO-BLAST	g34562.t1	---NA---	460									IPR003851 (PFAM)	P:GO:0006355; F:GO:0003677	P:regulation of DNA-templated transcription; F:DNA binding
TRUE	INTERPRO, NO-BLAST	g18024.t1	---NA---	707									IPR000477 (PFAM)	no GO terms	no GO terms
TRUE	INTERPRO, NO-BLAST	g40947.t1	---NA---	688									IPR008906 (PFAM); IPR007021 (PFAM); IPR003656 (PFAM); IPR025525 (PFAM)	F:GO:0003677; F:GO:0046983	F:DNA binding; F:protein dimerization activity
TRUE	INTERPRO, NO-BLAST	g23633.t1	---NA---	160									IPR022796 (PFAM); IPR004456 (PFAM)	F:GO:0003824; F:GO:0046537	F:catalytic activity; F:2,3-bisphosphoglycerate-independent phosphoglycerate mutase activity
TRUE	INTERPRO, BLASTED, MAPPED	g12960.t1	peptidyl-prolyl cis-trans isomerase FKBP62-like	694	1	3.52709e-09	46.85	2	F:GO:0003755; F:GO:0016853	F:peptidyl-prolyl cis-trans isomerase activity; F:isomerase activity			IPR013105 (PFAM); PF14559 (PFAM); IPR001440 (PFAM); IPR000270 (PFAM); IPR011990 (PFAM)	F:GO:0005515	F:protein binding
TRUE	INTERPRO, BLASTED, MAPPED, ANNOTATED	g6114.t1	calmodulin-7	147	7	5.42212e-69	67.31	12	P:GO:0005513; P:GO:0006414; P:GO:0010099; P:GO:0050832; F:GO:0003746; F:GO:0004683; F:GO:0005509; F:GO:0005515; F:GO:0030234; F:GO:0032440; C:GO:0005634; C:GO:0005886	P:detection of calcium ion; P:translational elongation; P:regulation of photomorphogenesis; P:defense response to fungus; F:translation elongation factor activity; F:calcium/calmodulin-dependent protein kinase activity; F:calcium ion binding; F:protein binding; F:enzyme regulator activity; F:2-alkenal reductase [NAD(P)+] activity; C:nucleus; C:plasma membrane	EC:1.3.1.74; EC:2.7.11.17	2-alkenal reductase [NAD(P)(+)]; calcium/calmodulin-dependent protein kinase	IPR021784 (PFAM); IPR007046 (PFAM); IPR029098 (PFAM); IPR002048 (PFAM); IPR005574 (PFAM); IPR007791 (PFAM); IPR004108 (PFAM); IPR018727 (PFAM)	P:GO:0006351; P:GO:0006352; F:GO:0003677; F:GO:0003899; F:GO:0005509	P:DNA-templated transcription; P:DNA-templated transcription initiation; F:DNA binding; F:DNA-directed 5'-3' RNA polymerase activity; F:calcium ion binding
TRUE	INTERPRO, BLASTED, MAPPED, ANNOTATED	g11311.t1	transcription factor	372	15	5.58283e-22	61.78	1	F:GO:0043565	F:sequence-specific DNA binding			IPR003657 (PFAM)	P:GO:0006355; F:GO:0003700; F:GO:0043565	P:regulation of DNA-templated transcription; F:DNA-binding transcription factor activity; F:sequence-specific DNA binding
TRUE	INTERPRO, BLASTED, MAPPED, ANNOTATED	g6375.t1	UDP-glycosyltransferase	456	20	0	53.83	1	F:GO:0008194	F:UDP-glycosyltransferase activity	EC:2.4	Glycosyltransferases	IPR002213 (PFAM); IPR004276 (PFAM)	P:GO:0005975; P:GO:0008152; P:GO:0030259; F:GO:0016758	P:carbohydrate metabolic process; P:metabolic process; P:lipid glycosylation; F:hexosyltransferase activity
TRUE	INTERPRO, NO-BLAST	g39317.t1	---NA---	751									IPR006668 (PFAM); IPR001313 (PFAM)	F:GO:0003723	F:RNA binding
TRUE	INTERPRO, NO-BLAST	g39931.t1	---NA---	390									IPR013103 (PFAM)	no GO terms	no GO terms
TRUE	INTERPRO, NO-BLAST	g36719.t1	---NA---	533									IPR000477 (PFAM)	no GO terms	no GO terms
TRUE	INTERPRO, NO-BLAST	g20269.t1	---NA---	650									IPR025724 (PFAM); IPR001584 (PFAM); IPR001878 (PFAM); PF14223 (PFAM)	P:GO:0015074; F:GO:0003676; F:GO:0008270	P:DNA integration; F:nucleic acid binding; F:zinc ion binding
TRUE	INTERPRO, NO-BLAST	g40376.t1	---NA---	280									PF13561 (PFAM)	no GO terms	no GO terms
TRUE	INTERPRO, NO-BLAST	g1180.t1	---NA---	108									no IPS match	no IPS match	no IPS match
TRUE	INTERPRO, NO-BLAST	g35647.t1	---NA---	714									IPR000477 (PFAM)	no GO terms	no GO terms
TRUE	INTERPRO, NO-BLAST	g21044.t2	---NA---	510									IPR014757 (PFAM); IPR004827 (PFAM); IPR025519 (PFAM); IPR025422 (PFAM); IPR004826 (PFAM)	P:GO:0006351; P:GO:0006355; F:GO:0003677; F:GO:0003700; F:GO:0043565; C:GO:0005634	P:DNA-templated transcription; P:regulation of DNA-templated transcription; F:DNA binding; F:DNA-binding transcription factor activity; F:sequence-specific DNA binding; C:nucleus
TRUE	INTERPRO, NO-BLAST	g32387.t2	---NA---	365									IPR019149 (PFAM)	no GO terms	no GO terms
TRUE	INTERPRO, NO-BLAST	g10120.t1	---NA---	591									IPR012929 (PFAM); IPR008545 (PFAM)	P:GO:0006606	P:protein import into nucleus
TRUE	INTERPRO, NO-BLAST	g10211.t1	---NA---	268									IPR007612 (PFAM)	no GO terms	no GO terms
TRUE	INTERPRO, NO-BLAST	g26644.t1	---NA---	488									PF14223 (PFAM); IPR025314 (PFAM); IPR001878 (PFAM)	F:GO:0003676; F:GO:0008270	F:nucleic acid binding; F:zinc ion binding
TRUE	INTERPRO, BLASTED, MAPPED, ANNOTATED	g27065.t1	Calmodulin-7	116	3	4.99091e-09	53.57	3	P:GO:0050896; F:GO:0005488; C:GO:0005622	P:response to stimulus; F:binding; C:intracellular anatomical structure			IPR002048 (PFAM)	F:GO:0005509	F:calcium ion binding
TRUE	INTERPRO, BLASTED, MAPPED, ANNOTATED	g19537.t1	Calmodulin-7	503	20	0	51.53	11	P:GO:0010099; P:GO:0035556; P:GO:0050832; F:GO:0004683; F:GO:0005509; F:GO:0005516; F:GO:0005524; F:GO:0009931; C:GO:0005634; C:GO:0005737; C:GO:0005886	P:regulation of photomorphogenesis; P:intracellular signal transduction; P:defense response to fungus; F:calcium/calmodulin-dependent protein kinase activity; F:calcium ion binding; F:calmodulin binding; F:ATP binding; F:calcium-dependent protein serine/threonine kinase activity; C:nucleus; C:cytoplasm; C:plasma membrane	EC:2.7.11.17	calcium/calmodulin-dependent protein kinase	IPR000719 (PFAM); IPR007639 (PFAM); IPR002048 (PFAM); IPR018975 (PFAM); IPR002048 (PFAM); IPR015070 (PFAM)	P:GO:0006418; P:GO:0006468; F:GO:0000166; F:GO:0004672; F:GO:0004812; F:GO:0005509; F:GO:0005524; C:GO:0005737	P:tRNA aminoacylation for protein translation; P:protein phosphorylation; F:nucleotide binding; F:protein kinase activity; F:aminoacyl-tRNA ligase activity; F:calcium ion binding; F:ATP binding; C:cytoplasm
TRUE	INTERPRO, NO-BLAST	g10559.t1	---NA---	200									IPR008480 (PFAM)	no GO terms	no GO terms
TRUE	INTERPRO, NO-BLAST	g7516.t1	---NA---	157									IPR007650 (PFAM); IPR031951 (PFAM)	no GO terms	no GO terms
TRUE	INTERPRO, NO-BLAST	g8972.t1	---NA---	663									IPR000477 (PFAM)	no GO terms	no GO terms
TRUE	INTERPRO, NO-BLAST	g35118.t1	---NA---	704									IPR000477 (PFAM)	no GO terms	no GO terms
TRUE	INTERPRO, BLASTED, MAPPED, ANNOTATED	g38527.t1	9-lipoxygenase, partial	430	1	0	83.29	5	P:GO:0006633; P:GO:0031408; P:GO:0034440; F:GO:0016702; F:GO:0046872	P:fatty acid biosynthetic process; P:oxylipin biosynthetic process; P:lipid oxidation; F:oxidoreductase activity, acting on single donors with incorporation of molecular oxygen, incorporation of two atoms of oxygen; F:metal ion binding	EC:1.13.11	Acting on single donors with incorporation of molecular oxygen (oxygenases). The oxygen incorporated need not be derived from O2	IPR013819 (PFAM)	P:GO:0055114; F:GO:0016702; F:GO:0046872	P:obsolete oxidation-reduction process; F:oxidoreductase activity, acting on single donors with incorporation of molecular oxygen, incorporation of two atoms of oxygen; F:metal ion binding
TRUE	INTERPRO, BLASTED, MAPPED	g1921.t1	GRETCHEN HAGEN 3.6	605	2	0	63.92	2	F:GO:0010279; C:GO:0005737	F:indole-3-acetic acid amido synthetase activity; C:cytoplasm			IPR014886 (PFAM); IPR004993 (PFAM)	F:GO:0003723	F:RNA binding
TRUE	INTERPRO, NO-BLAST	g35455.t1	---NA---	527									IPR001173 (PFAM); PF13641 (PFAM)	no GO terms	no GO terms
TRUE	INTERPRO, BLASTED, MAPPED	g41113.t1	nicotine N-demethylase	401	4	6.29554e-13	51.47	12	P:GO:0010268; P:GO:0016125; P:GO:0016132; P:GO:0032259; F:GO:0004497; F:GO:0004796; F:GO:0005506; F:GO:0008168; F:GO:0016705; F:GO:0020037; F:GO:0046872; C:GO:0016020	P:brassinosteroid homeostasis; P:sterol metabolic process; P:brassinosteroid biosynthetic process; P:methylation; F:monooxygenase activity; F:thromboxane-A synthase activity; F:iron ion binding; F:methyltransferase activity; F:oxidoreductase activity, acting on paired donors, with incorporation or reduction of molecular oxygen; F:heme binding; F:metal ion binding; C:membrane			IPR001128 (PFAM)	P:GO:0055114; F:GO:0005506; F:GO:0016705; F:GO:0020037	P:obsolete oxidation-reduction process; F:iron ion binding; F:oxidoreductase activity, acting on paired donors, with incorporation or reduction of molecular oxygen; F:heme binding
TRUE	INTERPRO, NO-BLAST	g7902.t1	---NA---	108									PF12728 (PFAM); IPR025322 (PFAM); IPR031780 (PFAM); PF13758 (PFAM)	no GO terms	no GO terms
TRUE	INTERPRO, NO-BLAST	g41956.t1	---NA---	383									IPR013888 (PFAM); IPR017916 (PFAM); IPR002885 (PFAM); IPR002885 (PFAM); IPR021799 (PFAM); IPR010418 (PFAM); IPR002885 (PFAM)	no GO terms	no GO terms
TRUE	INTERPRO, NO-BLAST	g43114.t1	---NA---	404									IPR025110 (PFAM); IPR000873 (PFAM)	P:GO:0008152; F:GO:0003824	P:metabolic process; F:catalytic activity
TRUE	INTERPRO, NO-BLAST	g1812.t3	---NA---	641									no IPS match	no IPS match	no IPS match
TRUE	INTERPRO, NO-BLAST	g43140.t1	---NA---	381									IPR010402 (PFAM); IPR000315 (PFAM)	F:GO:0005515; F:GO:0008270; C:GO:0005622	F:protein binding; F:zinc ion binding; C:intracellular anatomical structure
TRUE	INTERPRO, BLASTED, MAPPED, ANNOTATED	g16783.t1	MYB transcription factor	318	8	2.71915e-51	70.82	2	P:GO:0006355; F:GO:0000976	P:regulation of DNA-templated transcription; F:transcription cis-regulatory region binding			IPR031624 (PFAM); IPR001005 (PFAM); IPR007084 (PFAM)	no GO terms	no GO terms
TRUE	INTERPRO, BLASTED, MAPPED, ANNOTATED	g26054.t1	glutathione S-transferase U1	223	4	5.89099e-57	71.03	4	P:GO:0006749; P:GO:0009734; F:GO:0004364; C:GO:0005829	P:glutathione metabolic process; P:auxin-activated signaling pathway; F:glutathione transferase activity; C:cytosol	EC:2.5.1.18	glutathione transferase	IPR004046 (PFAM); IPR004045 (PFAM)	F:GO:0005515	F:protein binding
TRUE	INTERPRO, NO-BLAST	g27689.t1	---NA---	176									IPR000315 (PFAM); IPR032296 (PFAM)	F:GO:0008270; C:GO:0005622	F:zinc ion binding; C:intracellular anatomical structure
TRUE	INTERPRO, NO-BLAST	g11999.t1	---NA---	686									IPR007021 (PFAM); IPR008906 (PFAM); IPR003656 (PFAM); IPR025525 (PFAM)	F:GO:0003677; F:GO:0046983	F:DNA binding; F:protein dimerization activity
TRUE	INTERPRO, NO-BLAST	g42490.t1	---NA---	457									IPR000477 (PFAM)	no GO terms	no GO terms
TRUE	INTERPRO, NO-BLAST	g9766.t1	---NA---	626									IPR024886 (PFAM); IPR032406 (PFAM); IPR008417 (PFAM); IPR027356 (PFAM); IPR007060 (PFAM); IPR000210 (PFAM); IPR020269 (PFAM)	P:GO:0006886; P:GO:0007049; P:GO:0051607; F:GO:0005515; C:GO:0005783; C:GO:0016020	P:intracellular protein transport; P:cell cycle; P:defense response to virus; F:protein binding; C:endoplasmic reticulum; C:membrane
TRUE	INTERPRO, NO-BLAST	g18054.t1	---NA---	729									IPR007021 (PFAM); IPR008906 (PFAM); IPR003656 (PFAM)	F:GO:0003677; F:GO:0046983	F:DNA binding; F:protein dimerization activity
TRUE	INTERPRO, NO-BLAST	g3776.t1	---NA---	481									IPR000408 (PFAM); PF13540 (PFAM)	no GO terms	no GO terms
TRUE	INTERPRO, NO-BLAST	g32769.t2	---NA---	170									IPR006780 (PFAM); IPR005735 (PFAM); IPR007808 (PFAM)	P:GO:0007275	P:multicellular organism development
TRUE	INTERPRO, BLASTED, MAPPED	g36896.t1	DNA-binding bromodomain-containing protein	230	1	7.05333e-16	63.64	3	P:GO:0010597; F:GO:0000976; F:GO:0003677	P:green leaf volatile biosynthetic process; F:transcription cis-regulatory region binding; F:DNA binding			IPR001487 (PFAM)	F:GO:0005515	F:protein binding
TRUE	INTERPRO, NO-BLAST	g30059.t1	---NA---	541									IPR004839 (PFAM); IPR003191 (PFAM); IPR021622 (PFAM)	P:GO:0009058; F:GO:0003924; F:GO:0005525; F:GO:0030170	P:biosynthetic process; F:GTPase activity; F:GTP binding; F:pyridoxal phosphate binding
TRUE	INTERPRO, NO-BLAST	g30476.t1	---NA---	663									IPR000477 (PFAM)	no GO terms	no GO terms
TRUE	INTERPRO, NO-BLAST	g2320.t1	---NA---	346									IPR013149 (PFAM); PF16884 (PFAM)	P:GO:0055114	P:obsolete oxidation-reduction process
TRUE	INTERPRO, NO-BLAST	g41156.t1	---NA---	401									IPR000477 (PFAM)	no GO terms	no GO terms
TRUE	INTERPRO, BLASTED, MAPPED	g34135.t1	plastid NEP interaction protein	166	3	4.43344e-09	57.34	2	F:GO:0046872; F:GO:0061630	F:metal ion binding; F:ubiquitin protein ligase activity			IPR001841 (PFAM); IPR024766 (PFAM); IPR031946 (PFAM)	F:GO:0005515; F:GO:0008270	F:protein binding; F:zinc ion binding
TRUE	INTERPRO, NO-BLAST	g13049.t1	---NA---	376									IPR000477 (PFAM)	no GO terms	no GO terms
TRUE	INTERPRO, BLASTED, MAPPED	g33059.t1	polyamine oxidase	537	1	1.8951e-07	62.5	3	P:GO:0006598; F:GO:0016491; F:GO:0046592	P:polyamine catabolic process; F:oxidoreductase activity; F:polyamine oxidase activity			IPR002937 (PFAM)	P:GO:0055114; F:GO:0016491	P:obsolete oxidation-reduction process; F:oxidoreductase activity
TRUE	INTERPRO, NO-BLAST	g34461.t1	---NA---	743									IPR000477 (PFAM)	no GO terms	no GO terms
TRUE	INTERPRO, NO-BLAST	g27724.t1	---NA---	476									IPR000477 (PFAM)	no GO terms	no GO terms
TRUE	INTERPRO, NO-BLAST	g32684.t1	---NA---	574									no IPS match	no IPS match	no IPS match
TRUE	INTERPRO, NO-BLAST	g1967.t1	---NA---	533									IPR000477 (PFAM); IPR022597 (PFAM)	F:GO:0004521	F:RNA endonuclease activity
TRUE	INTERPRO, NO-BLAST	g17777.t1	---NA---	409									IPR004263 (PFAM)	no GO terms	no GO terms
TRUE	INTERPRO, NO-BLAST	g10989.t1	---NA---	571									IPR001465 (PFAM)	P:GO:0006097; F:GO:0004474	P:glyoxylate cycle; F:malate synthase activity
TRUE	INTERPRO, NO-BLAST	g30692.t1	---NA---	196									IPR008480 (PFAM)	no GO terms	no GO terms
TRUE	INTERPRO, BLASTED, MAPPED, ANNOTATED	g7924.t1	Aminocyclopropanecarboxylate oxidase	319	6	0	93.12	7	P:GO:0002238; P:GO:0009693; P:GO:0009805; P:GO:0009835; F:GO:0016706; F:GO:0031418; F:GO:0046872	P:response to molecule of fungal origin; P:ethylene biosynthetic process; P:coumarin biosynthetic process; P:fruit ripening; F:2-oxoglutarate-dependent dioxygenase activity; F:L-ascorbic acid binding; F:metal ion binding	EC:1.14.11	Acting on paired donors, with incorporation or reduction of molecular oxygen. The oxygen incorporated need not be derived from O2	IPR005123 (PFAM); IPR026992 (PFAM)	P:GO:0055114; F:GO:0016491	P:obsolete oxidation-reduction process; F:oxidoreductase activity
TRUE	INTERPRO, NO-BLAST	g16835.t1	---NA---	436									IPR000477 (PFAM)	no GO terms	no GO terms
TRUE	INTERPRO, NO-BLAST	g17879.t1	---NA---	436									IPR000477 (PFAM)	no GO terms	no GO terms
TRUE	INTERPRO, NO-BLAST	g42573.t1	---NA---	370									IPR000620 (PFAM)	C:GO:0016020; C:GO:0016020	C:membrane; C:membrane
TRUE	INTERPRO, NO-BLAST	g32133.t1	---NA---	450									IPR025733 (PFAM); IPR004843 (PFAM); IPR015914 (PFAM)	F:GO:0003993; F:GO:0016787; F:GO:0046872	F:acid phosphatase activity; F:hydrolase activity; F:metal ion binding
TRUE	INTERPRO, NO-BLAST	g21799.t1	---NA---	348									IPR000477 (PFAM)	no GO terms	no GO terms
TRUE	INTERPRO, NO-BLAST	g30394.t1	---NA---	288									IPR002885 (PFAM); IPR001875 (PFAM); IPR007187 (PFAM); IPR013888 (PFAM); IPR002885 (PFAM)	P:GO:0042981; F:GO:0005515	P:regulation of apoptotic process; F:protein binding
TRUE	INTERPRO, NO-BLAST	g36052.t1	---NA---	376									IPR000477 (PFAM)	no GO terms	no GO terms
TRUE	INTERPRO, NO-BLAST	g9339.t1	---NA---	410									IPR002641 (PFAM)	P:GO:0006629	P:lipid metabolic process
TRUE	INTERPRO, NO-BLAST	g15677.t1	---NA---	357									IPR012967 (PFAM); IPR001077 (PFAM); IPR031725 (PFAM)	F:GO:0008171; F:GO:0046983	F:O-methyltransferase activity; F:protein dimerization activity
TRUE	INTERPRO, NO-BLAST	g12458.t1	---NA---	510									IPR000477 (PFAM); IPR017956 (PFAM)	F:GO:0003677	F:DNA binding
TRUE	INTERPRO, NO-BLAST	g44323.t1	---NA---	102									no IPS match	no IPS match	no IPS match
TRUE	INTERPRO, NO-BLAST	g17386.t1	---NA---	515									IPR000477 (PFAM)	no GO terms	no GO terms
TRUE	INTERPRO, NO-BLAST	g38866.t1	---NA---	476									IPR000477 (PFAM)	no GO terms	no GO terms
TRUE	INTERPRO, BLASTED, MAPPED	g29666.t1	Aminocyclopropanecarboxylate oxidase	346	6	5.50603e-26	50.88	8	P:GO:0002238; P:GO:0009693; P:GO:0009805; P:GO:0009835; F:GO:0016491; F:GO:0016706; F:GO:0031418; F:GO:0046872	P:response to molecule of fungal origin; P:ethylene biosynthetic process; P:coumarin biosynthetic process; P:fruit ripening; F:oxidoreductase activity; F:2-oxoglutarate-dependent dioxygenase activity; F:L-ascorbic acid binding; F:metal ion binding			IPR026992 (PFAM); IPR005123 (PFAM)	P:GO:0055114; F:GO:0016491	P:obsolete oxidation-reduction process; F:oxidoreductase activity
TRUE	INTERPRO, BLASTED, MAPPED, ANNOTATED	g29696.t1	Chain A, Disease resistance protein Roq1	482	14	1.31281e-74	53.08	1	P:GO:0006950	P:response to stress			IPR003959 (PFAM); IPR002182 (PFAM)	F:GO:0005524; F:GO:0043531	F:ATP binding; F:ADP binding
TRUE	INTERPRO, NO-BLAST	g21613.t1	---NA---	376									IPR000477 (PFAM)	no GO terms	no GO terms
TRUE	INTERPRO, NO-BLAST	g15430.t1	---NA---	495									IPR001360 (PFAM); IPR008753 (PFAM)	P:GO:0005975; P:GO:0006508; F:GO:0004553	P:carbohydrate metabolic process; P:proteolysis; F:hydrolase activity, hydrolyzing O-glycosyl compounds
TRUE	INTERPRO, NO-BLAST	g7628.t1	---NA---	533									IPR000477 (PFAM)	no GO terms	no GO terms
TRUE	INTERPRO, NO-BLAST	g28943.t1	---NA---	490									IPR002641 (PFAM)	P:GO:0006629	P:lipid metabolic process
TRUE	INTERPRO, NO-BLAST	g12690.t1	---NA---	441									IPR002912 (PFAM)	P:GO:0008152; F:GO:0016597	P:metabolic process; F:amino acid binding
TRUE	INTERPRO, NO-BLAST	g6182.t1	---NA---	436									IPR000477 (PFAM)	no GO terms	no GO terms
TRUE	INTERPRO, BLASTED, MAPPED, ANNOTATED	g25537.t1	Calmodulin-7	532	20	0	52.02	10	P:GO:0010099; P:GO:0035556; P:GO:0050832; F:GO:0004674; F:GO:0005515; F:GO:0046872; F:GO:0097159; C:GO:0005634; C:GO:0005737; C:GO:0005886	P:regulation of photomorphogenesis; P:intracellular signal transduction; P:defense response to fungus; F:protein serine/threonine kinase activity; F:protein binding; F:metal ion binding; F:organic cyclic compound binding; C:nucleus; C:cytoplasm; C:plasma membrane	EC:2.7.11.1	non-specific serine/threonine protein kinase	IPR028956 (PFAM); IPR002048 (PFAM); IPR000719 (PFAM); IPR002575 (PFAM); IPR008632 (PFAM); PF13155 (PFAM)	P:GO:0006468; F:GO:0004672; F:GO:0005509; F:GO:0005524; F:GO:0008289	P:protein phosphorylation; F:protein kinase activity; F:calcium ion binding; F:ATP binding; F:lipid binding
TRUE	INTERPRO, NO-BLAST	g6015.t1	---NA---	131									no IPS match	no IPS match	no IPS match
TRUE	INTERPRO, NO-BLAST	g43559.t2	---NA---	444									IPR000717 (PFAM); IPR018925 (PFAM); IPR025210 (PFAM); IPR025838 (PFAM); IPR019734 (PFAM)	P:GO:0048255; F:GO:0005515	P:mRNA stabilization; F:protein binding
TRUE	INTERPRO, NO-BLAST	g44143.t1	---NA---	199									IPR007455 (PFAM)	no GO terms	no GO terms
TRUE	INTERPRO, NO-BLAST	g8363.t2	---NA---	414									IPR004776 (PFAM)	P:GO:0055085; C:GO:0016020	P:transmembrane transport; C:membrane
TRUE	INTERPRO, BLASTED, MAPPED	g11813.t1	zinc finger protein PIF1	428	1	1.9377e-16	59.55	4	P:GO:0006355; F:GO:0000976; F:GO:0003700; C:GO:0005634	P:regulation of DNA-templated transcription; F:transcription cis-regulatory region binding; F:DNA-binding transcription factor activity; C:nucleus			IPR001841 (PFAM); IPR032553 (PFAM); IPR007087 (PFAM); PF12874 (PFAM); IPR022755 (PFAM)	F:GO:0005515; F:GO:0008270; F:GO:0046872	F:protein binding; F:zinc ion binding; F:metal ion binding
TRUE	INTERPRO, NO-BLAST	g29071.t1	---NA---	202									IPR010547 (PFAM)	P:GO:0045040; C:GO:0005742	P:protein insertion into mitochondrial outer membrane; C:mitochondrial outer membrane translocase complex
TRUE	INTERPRO, NO-BLAST	g28489.t1	---NA---	152									no IPS match	no IPS match	no IPS match
TRUE	INTERPRO, BLASTED, MAPPED	g22535.t1	5-epi-aristolochene synthase	515	4	1.67249e-100	52.58	8	P:GO:0008299; P:GO:0016102; P:GO:0016114; F:GO:0000287; F:GO:0010333; F:GO:0016838; F:GO:0046872; C:GO:0005737	P:isoprenoid biosynthetic process; P:diterpenoid biosynthetic process; P:terpenoid biosynthetic process; F:magnesium ion binding; F:terpene synthase activity; F:carbon-oxygen lyase activity, acting on phosphates; F:metal ion binding; C:cytoplasm			IPR001906 (PFAM); IPR005630 (PFAM)	P:GO:0008152; F:GO:0000287; F:GO:0010333; F:GO:0016829	P:metabolic process; F:magnesium ion binding; F:terpene synthase activity; F:lyase activity
TRUE	INTERPRO, BLASTED, MAPPED, ANNOTATED	g24918.t1	syntaxin, partial	311	1	8.92155e-110	82.25	9	P:GO:0006886; P:GO:0006887; P:GO:0006906; P:GO:0048278; F:GO:0000149; F:GO:0005484; C:GO:0005886; C:GO:0012505; C:GO:0031201	P:intracellular protein transport; P:exocytosis; P:vesicle fusion; P:vesicle docking; F:SNARE binding; F:SNAP receptor activity; C:plasma membrane; C:endomembrane system; C:SNARE complex			IPR019052 (PFAM); IPR006011 (PFAM); IPR015260 (PFAM); IPR008840 (PFAM); IPR000727 (PFAM); IPR025304 (PFAM); IPR011684 (PFAM); IPR010287 (PFAM); IPR000533 (PFAM); IPR007696 (PFAM); IPR008716 (PFAM)	P:GO:0006298; P:GO:0009312; P:GO:0009877; P:GO:0048193; F:GO:0003779; F:GO:0005515; F:GO:0005524; F:GO:0016758; F:GO:0030983; C:GO:0016020	P:mismatch repair; P:oligosaccharide biosynthetic process; P:nodulation; P:Golgi vesicle transport; F:actin binding; F:protein binding; F:ATP binding; F:hexosyltransferase activity; F:mismatched DNA binding; C:membrane
TRUE	INTERPRO, NO-BLAST	g22037.t1	---NA---	440									IPR000477 (PFAM)	no GO terms	no GO terms
TRUE	INTERPRO, NO-BLAST	g42947.t1	---NA---	462									IPR001810 (PFAM)	F:GO:0005515	F:protein binding
TRUE	INTERPRO, BLASTED, MAPPED, ANNOTATED	g6357.t1	MYB transcription factor	423	8	2.1235e-63	75.79	4	P:GO:0006355; P:GO:0010597; F:GO:0000976; C:GO:0005634	P:regulation of DNA-templated transcription; P:green leaf volatile biosynthetic process; F:transcription cis-regulatory region binding; C:nucleus			IPR003783 (PFAM); IPR001005 (PFAM); PF15963 (PFAM)	P:GO:0006282	P:regulation of DNA repair
TRUE	INTERPRO, BLASTED, MAPPED, ANNOTATED	g18419.t1	transcription factor	186	15	2.63922e-33	72.53	4	P:GO:0006355; F:GO:0003700; F:GO:0043565; C:GO:0005634	P:regulation of DNA-templated transcription; F:DNA-binding transcription factor activity; F:sequence-specific DNA binding; C:nucleus			IPR003657 (PFAM)	P:GO:0006355; F:GO:0003700; F:GO:0043565	P:regulation of DNA-templated transcription; F:DNA-binding transcription factor activity; F:sequence-specific DNA binding
TRUE	INTERPRO, NO-BLAST	g45357.t1	---NA---	153									IPR002068 (PFAM); IPR027991 (PFAM)	no GO terms	no GO terms
TRUE	INTERPRO, NO-BLAST	g30078.t1	---NA---	431									IPR027949 (PFAM); IPR018702 (PFAM)	no GO terms	no GO terms
TRUE	INTERPRO, BLASTED, MAPPED	g40038.t1	Chain A, NRC2a	154	3	0.000131022	57.76	4	P:GO:0006952; P:GO:0051707; P:GO:0098542; F:GO:0043531	P:defense response; P:response to other organism; P:defense response to other organism; F:ADP binding			IPR024957 (PFAM)	F:GO:0008017	F:microtubule binding
TRUE	INTERPRO, NO-BLAST	g17918.t1	---NA---	192									IPR026823 (PFAM); IPR000858 (PFAM)	P:GO:0048544	P:recognition of pollen
TRUE	INTERPRO, NO-BLAST	g17936.t1	---NA---	375									IPR000477 (PFAM)	no GO terms	no GO terms
TRUE	INTERPRO, NO-BLAST	g18943.t1	---NA---	369									IPR006458 (PFAM)	no GO terms	no GO terms
TRUE	INTERPRO, NO-BLAST	g24772.t1	---NA---	253									IPR018589 (PFAM); IPR014245 (PFAM)	no GO terms	no GO terms
TRUE	INTERPRO, NO-BLAST	g24093.t1	---NA---	404									IPR013103 (PFAM)	no GO terms	no GO terms
TRUE	INTERPRO, NO-BLAST	g12268.t1	---NA---	401									IPR000477 (PFAM)	no GO terms	no GO terms
TRUE	INTERPRO, NO-BLAST	g9014.t1	---NA---	266									IPR007177 (PFAM); IPR007209 (PFAM)	no GO terms	no GO terms
TRUE	INTERPRO, NO-BLAST	g18146.t1	---NA---	200									IPR007527 (PFAM)	F:GO:0008270	F:zinc ion binding
TRUE	INTERPRO, NO-BLAST	g12119.t1	---NA---	251									IPR032415 (PFAM); IPR003103 (PFAM); IPR010123 (PFAM)	P:GO:0051262; F:GO:0051087	P:protein tetramerization; F:protein-folding chaperone binding
TRUE	INTERPRO, NO-BLAST	g26967.t1	---NA---	401									IPR000477 (PFAM)	no GO terms	no GO terms
TRUE	INTERPRO, BLASTED, MAPPED	g45623.t1	hydroxycinnamoyl transferase	454	3	1.79001e-17	40.23	2	F:GO:0016740; F:GO:0016747	F:transferase activity; F:acyltransferase activity, transferring groups other than amino-acyl groups			IPR003480 (PFAM)	F:GO:0016747	F:acyltransferase activity, transferring groups other than amino-acyl groups
TRUE	INTERPRO, NO-BLAST	g20433.t1	---NA---	145									IPR001789 (PFAM)	P:GO:0000160	P:phosphorelay signal transduction system
TRUE	INTERPRO, NO-BLAST	g16764.t1	---NA---	93									no IPS match	no IPS match	no IPS match
TRUE	INTERPRO, NO-BLAST	g35075.t2	---NA---	321									IPR006476 (PFAM)	no GO terms	no GO terms
TRUE	INTERPRO, NO-BLAST	g31912.t1	---NA---	306									IPR000477 (PFAM)	no GO terms	no GO terms
TRUE	INTERPRO, NO-BLAST	g10556.t1	---NA---	189									IPR013237 (PFAM); IPR012876 (PFAM)	F:GO:0003896; F:GO:0004386; F:GO:0008270	F:DNA primase activity; F:helicase activity; F:zinc ion binding
TRUE	INTERPRO, NO-BLAST	g3749.t1	---NA---	311									IPR000477 (PFAM)	no GO terms	no GO terms
TRUE	INTERPRO, NO-BLAST	g14968.t1	---NA---	282									IPR014946 (PFAM); IPR013103 (PFAM); IPR029306 (PFAM)	no GO terms	no GO terms
TRUE	INTERPRO, NO-BLAST	g1657.t1	---NA---	348									IPR000477 (PFAM)	no GO terms	no GO terms
TRUE	INTERPRO, NO-BLAST	g34685.t1	---NA---	76									IPR025572 (PFAM)	no GO terms	no GO terms
TRUE	INTERPRO, NO-BLAST	g31039.t2	---NA---	255									IPR022143 (PFAM); IPR011016 (PFAM)	F:GO:0008270	F:zinc ion binding
TRUE	INTERPRO, NO-BLAST	g38403.t2	---NA---	409									IPR000007 (PFAM); IPR021916 (PFAM); IPR001810 (PFAM)	F:GO:0005515	F:protein binding
TRUE	INTERPRO, NO-BLAST	g37610.t1	---NA---	441									IPR025030 (PFAM); IPR010402 (PFAM)	F:GO:0005515	F:protein binding
TRUE	INTERPRO, NO-BLAST	g41954.t1	---NA---	265									IPR000477 (PFAM)	no GO terms	no GO terms
TRUE	INTERPRO, NO-BLAST	g2028.t1	---NA---	245									no IPS match	no IPS match	no IPS match
TRUE	INTERPRO, BLASTED, MAPPED	g33188.t1	trypsin proteinase inhibitor precursor	82	1	1.79111e-07	53.85	1	F:GO:0004867	F:serine-type endopeptidase inhibitor activity			IPR003465 (PFAM)	F:GO:0004867	F:serine-type endopeptidase inhibitor activity
TRUE	INTERPRO, NO-BLAST	g12293.t1	---NA---	139									PF13431 (PFAM)	no GO terms	no GO terms
TRUE	INTERPRO, NO-BLAST	g33384.t1	---NA---	164									IPR001810 (PFAM)	F:GO:0005515	F:protein binding
TRUE	INTERPRO, NO-BLAST	g22318.t1	---NA---	200									IPR007706 (PFAM); IPR024436 (PFAM); IPR000315 (PFAM); IPR022027 (PFAM)	P:GO:0016032; F:GO:0008270; C:GO:0005622; C:GO:0042025	P:viral process; F:zinc ion binding; C:intracellular anatomical structure; C:host cell nucleus
TRUE	INTERPRO, BLASTED, MAPPED, ANNOTATED	g22553.t1	MADS-box-containing protein	135	6	1.3228e-09	58.43	1	F:GO:0003677	F:DNA binding			IPR002487 (PFAM); IPR007475 (PFAM)	P:GO:0006355; F:GO:0003700; C:GO:0005634	P:regulation of DNA-templated transcription; F:DNA-binding transcription factor activity; C:nucleus
TRUE	INTERPRO, NO-BLAST	g24554.t1	---NA---	169									IPR011074 (PFAM); IPR001251 (PFAM)	no GO terms	no GO terms
TRUE	INTERPRO, NO-BLAST	g24570.t1	---NA---	205									no IPS match	no IPS match	no IPS match
TRUE	INTERPRO, BLASTED, MAPPED, ANNOTATED	g13968.t1	salicylic acid methyl transferase	355	1	1.43149e-154	75.35	1	F:GO:0008168	F:methyltransferase activity	EC:2.1.1	Transferring one-carbon groups	IPR005299 (PFAM)	F:GO:0008168	F:methyltransferase activity
TRUE	INTERPRO, NO-BLAST	g43097.t1	---NA---	150									IPR013992 (PFAM)	P:GO:0007010; F:GO:0003779	P:cytoskeleton organization; F:actin binding
TRUE	INTERPRO, NO-BLAST	g21625.t1	---NA---	90									no IPS match	no IPS match	no IPS match
TRUE	INTERPRO, BLASTED, MAPPED, ANNOTATED	g39842.t1	auxin-responsive protein IAA29	220	2	1.4701e-139	72.05	3	P:GO:0006355; P:GO:0009734; C:GO:0005634	P:regulation of DNA-templated transcription; P:auxin-activated signaling pathway; C:nucleus			IPR033389 (PFAM)	no GO terms	no GO terms
TRUE	INTERPRO, NO-BLAST	g26896.t1	---NA---	237									IPR004268 (PFAM)	no GO terms	no GO terms
TRUE	INTERPRO, NO-BLAST	g12661.t1	---NA---	105									IPR006121 (PFAM)	P:GO:0030001; F:GO:0046872	P:metal ion transport; F:metal ion binding
TRUE	INTERPRO, NO-BLAST	g39364.t1	---NA---	128									IPR008808 (PFAM); IPR017243 (PFAM)	C:GO:0030133; C:GO:0031083	C:transport vesicle; C:BLOC-1 complex
TRUE	INTERPRO, NO-BLAST	g14620.t1	---NA---	126									no IPS match	no IPS match	no IPS match
TRUE	INTERPRO, BLASTED, MAPPED	g42990.t1	Chain C, Membrane-localized LRR receptor-like protein	184	18	5.13728e-22	55.36	8	P:GO:0006952; P:GO:0051707; F:GO:0004672; F:GO:0004674; F:GO:0005096; F:GO:0005524; F:GO:0016301; C:GO:0016020	P:defense response; P:response to other organism; F:protein kinase activity; F:protein serine/threonine kinase activity; F:GTPase activator activity; F:ATP binding; F:kinase activity; C:membrane			IPR001611 (PFAM); IPR001611 (PFAM)	F:GO:0005515	F:protein binding
TRUE	INTERPRO, BLASTED, MAPPED	g10669.t2	peroxisomal (S)-2-hydroxy-acid oxidase-like	329	1	1.97537e-130	69.66	6	P:GO:0051707; F:GO:0000166; F:GO:0003973; F:GO:0010181; F:GO:0016491; C:GO:0005777	P:response to other organism; F:nucleotide binding; F:(S)-2-hydroxy-acid oxidase activity; F:FMN binding; F:oxidoreductase activity; C:peroxisome			IPR000262 (PFAM)	F:GO:0016491	F:oxidoreductase activity
TRUE	INTERPRO, NO-BLAST	g16729.t1	---NA---	185									IPR002885 (PFAM); IPR002885 (PFAM)	no GO terms	no GO terms
TRUE	INTERPRO, NO-BLAST	g162.t1	---NA---	96									IPR001005 (PFAM)	no GO terms	no GO terms
TRUE	INTERPRO, NO-BLAST	g3452.t1	---NA---	103									PF16884 (PFAM)	no GO terms	no GO terms
TRUE	INTERPRO, BLASTED, MAPPED	g16216.t1	pathogenesis-related protein PR-10	206	1	1.10064e-06	59.32	7	P:GO:0006952; P:GO:0009738; F:GO:0004864; F:GO:0010427; F:GO:0038023; C:GO:0005634; C:GO:0005737	P:defense response; P:abscisic acid-activated signaling pathway; F:protein phosphatase inhibitor activity; F:abscisic acid binding; F:signaling receptor activity; C:nucleus; C:cytoplasm			IPR019587 (PFAM)	no GO terms	no GO terms
TRUE	INTERPRO, NO-BLAST	g29602.t1	---NA---	178									IPR006936 (PFAM)	no GO terms	no GO terms
TRUE	INTERPRO, BLASTED, MAPPED, ANNOTATED	g33293.t1	clade XI lectin receptor kinase	837	20	1.69642e-67	59.54	1	F:GO:0016301	F:kinase activity	EC:2.7	Transferring phosphorus-containing groups	IPR021820 (PFAM); IPR003470 (PFAM); IPR000858 (PFAM); IPR001480 (PFAM); IPR001245 (PFAM); IPR021494 (PFAM); IPR006149 (PFAM); IPR003609 (PFAM)	P:GO:0006468; P:GO:0048544; F:GO:0004672; F:GO:0004674	P:protein phosphorylation; P:recognition of pollen; F:protein kinase activity; F:protein serine/threonine kinase activity
TRUE	INTERPRO, NO-BLAST	g11262.t2	---NA---	569									IPR002862 (PFAM); IPR010090 (PFAM); IPR011990 (PFAM); PF13424 (PFAM); IPR007330 (PFAM); PF12688 (PFAM)	F:GO:0005515	F:protein binding
TRUE	INTERPRO, NO-BLAST	g43935.t1	---NA---	95									IPR001005 (PFAM); IPR021244 (PFAM); IPR015024 (PFAM); IPR016072 (PFAM)	P:GO:0006511	P:ubiquitin-dependent protein catabolic process
TRUE	INTERPRO, NO-BLAST	g17220.t1	---NA---	175									IPR009489 (PFAM)	no GO terms	no GO terms
TRUE	INTERPRO, BLASTED, MAPPED	g29224.t1	SAUR14	101	1	6.58266e-22	75.38	1	P:GO:0009733	P:response to auxin			IPR003676 (PFAM); IPR025588 (PFAM)	P:GO:0009733	P:response to auxin
TRUE	INTERPRO, BLASTED, MAPPED, ANNOTATED	g43000.t1	glutathione transferase	221	4	3.23606e-94	79.66	4	P:GO:0006749; P:GO:0009734; F:GO:0004364; C:GO:0005829	P:glutathione metabolic process; P:auxin-activated signaling pathway; F:glutathione transferase activity; C:cytosol	EC:2.5.1.18	glutathione transferase	IPR004045 (PFAM); IPR004046 (PFAM)	F:GO:0005515	F:protein binding
TRUE	INTERPRO, NO-BLAST	g24757.t1	---NA---	164									IPR002935 (PFAM)	F:GO:0008171	F:O-methyltransferase activity
TRUE	INTERPRO, BLASTED, MAPPED	g96.t1	SAUR14	105	1	1.20116e-22	75	1	P:GO:0009733	P:response to auxin			IPR003676 (PFAM)	P:GO:0009733	P:response to auxin
TRUE	INTERPRO, NO-BLAST	g29477.t1	---NA---	219									IPR008217 (PFAM)	no GO terms	no GO terms
TRUE	INTERPRO, NO-BLAST	g30006.t1	---NA---	175									IPR007493 (PFAM)	no GO terms	no GO terms
TRUE	INTERPRO, NO-BLAST	g31927.t1	---NA---	110									IPR013103 (PFAM)	no GO terms	no GO terms
TRUE	INTERPRO, BLASTED, MAPPED, ANNOTATED	g30467.t1	transcription factor	175	15	3.07392e-33	72.16	1	F:GO:0043565	F:sequence-specific DNA binding			IPR003657 (PFAM)	P:GO:0006355; F:GO:0003700; F:GO:0043565	P:regulation of DNA-templated transcription; F:DNA-binding transcription factor activity; F:sequence-specific DNA binding
TRUE	INTERPRO, NO-BLAST	g33678.t1	---NA---	122									no IPS match	no IPS match	no IPS match
TRUE	INTERPRO, NO-BLAST	g1588.t1	---NA---	393									IPR021101 (PFAM); PF13964 (PFAM); PF13415 (PFAM); IPR006652 (PFAM)	F:GO:0005515	F:protein binding
TRUE	INTERPRO, BLASTED, MAPPED, ANNOTATED	g5192.t1	SAUR14	85	1	9.46818e-43	86.42	1	P:GO:0009733	P:response to auxin			IPR003676 (PFAM)	P:GO:0009733	P:response to auxin
TRUE	INTERPRO, NO-BLAST	g18559.t1	---NA---	125									IPR024415 (PFAM); IPR033412 (PFAM)	no GO terms	no GO terms
TRUE	INTERPRO, NO-BLAST	g20675.t1	---NA---	138									no IPS match	no IPS match	no IPS match
TRUE	INTERPRO, BLASTED, MAPPED, ANNOTATED	g29839.t1	ethylene response factor 3	184	6	3.40507e-18	81.72	6	P:GO:0006355; P:GO:0006952; P:GO:0009873; F:GO:0000976; F:GO:0003700; C:GO:0005634	P:regulation of DNA-templated transcription; P:defense response; P:ethylene-activated signaling pathway; F:transcription cis-regulatory region binding; F:DNA-binding transcription factor activity; C:nucleus			IPR001471 (PFAM)	P:GO:0006355; F:GO:0003700	P:regulation of DNA-templated transcription; F:DNA-binding transcription factor activity
TRUE	INTERPRO, BLASTED, MAPPED	g4102.t1	SAUR14	170	1	1.34424e-09	57.35	1	P:GO:0009733	P:response to auxin			IPR003676 (PFAM)	P:GO:0009733	P:response to auxin
TRUE	INTERPRO, NO-BLAST	g43793.t1	---NA---	81									no IPS match	no IPS match	no IPS match
TRUE	INTERPRO, NO-BLAST	g13441.t1	---NA---	1028									no IPS match	no IPS match	no IPS match
TRUE	INTERPRO, NO-BLAST	g30335.t1	---NA---	639									IPR019791 (PFAM)	no GO terms	no GO terms
TRUE	INTERPRO, NO-BLAST	g33797.t1	---NA---	196									IPR008551 (PFAM)	no GO terms	no GO terms
TRUE	INTERPRO, BLASTED, MAPPED, ANNOTATED	g7668.t1	clade XI lectin receptor kinase	865	20	1.30658e-92	51.77	2	P:GO:0050896; F:GO:0016301	P:response to stimulus; F:kinase activity	EC:2.7	Transferring phosphorus-containing groups	IPR001611 (PFAM); IPR000719 (PFAM); IPR001611 (PFAM); IPR025875 (PFAM); IPR013210 (PFAM)	P:GO:0006468; F:GO:0004672; F:GO:0005515; F:GO:0005524	P:protein phosphorylation; F:protein kinase activity; F:protein binding; F:ATP binding
TRUE	INTERPRO, BLASTED, MAPPED	g19428.t1	plastid NEP interaction protein	144	2	4.29872e-08	55.65	2	F:GO:0046872; F:GO:0061630	F:metal ion binding; F:ubiquitin protein ligase activity			IPR001841 (PFAM); IPR010095 (PFAM); IPR007244 (PFAM)	F:GO:0005515; F:GO:0008270	F:protein binding; F:zinc ion binding
TRUE	INTERPRO, NO-BLAST	g36638.t1	---NA---	854									IPR026881 (PFAM); IPR002013 (PFAM)	F:GO:0042578	F:phosphoric ester hydrolase activity
TRUE	INTERPRO, NO-BLAST	g41132.t1	---NA---	130									no IPS match	no IPS match	no IPS match
TRUE	INTERPRO, NO-BLAST	g12121.t1	---NA---	558									IPR024746 (PFAM)	F:GO:0033926	F:endo-alpha-N-acetylgalactosaminidase activity
TRUE	INTERPRO, BLASTED, MAPPED	g3753.t1	hydroxycinnamoyl transferase	470	3	5.82528e-35	41.81	2	F:GO:0016740; F:GO:0016747	F:transferase activity; F:acyltransferase activity, transferring groups other than amino-acyl groups			IPR003480 (PFAM); IPR032169 (PFAM)	F:GO:0016747	F:acyltransferase activity, transferring groups other than amino-acyl groups
TRUE	INTERPRO, NO-BLAST	g41327.t1	---NA---	434									IPR000477 (PFAM)	no GO terms	no GO terms
TRUE	INTERPRO, BLASTED, MAPPED, ANNOTATED	g7074.t1	putative boron transporter	718	1	0	99.72	6	P:GO:0006820; P:GO:0035445; P:GO:0050801; F:GO:0005452; F:GO:0046715; C:GO:0005886	P:monoatomic anion transport; P:borate transmembrane transport; P:monoatomic ion homeostasis; F:solute:inorganic anion antiporter activity; F:active borate transmembrane transporter activity; C:plasma membrane			IPR011531 (PFAM)	P:GO:0006820; C:GO:0016020	P:monoatomic anion transport; C:membrane
TRUE	INTERPRO, NO-BLAST	g4479.t1	---NA---	867									IPR000477 (PFAM); IPR005135 (PFAM)	no GO terms	no GO terms
TRUE	INTERPRO, NO-BLAST	g23953.t1	---NA---	781									IPR007431 (PFAM); IPR004331 (PFAM); IPR004342 (PFAM)	P:GO:0006633; F:GO:0008770; C:GO:0016020	P:fatty acid biosynthetic process; F:[acyl-carrier-protein] phosphodiesterase activity; C:membrane
TRUE	INTERPRO, NO-BLAST	g27624.t1	---NA---	130									no IPS match	no IPS match	no IPS match
TRUE	INTERPRO, NO-BLAST	g32910.t1	---NA---	100									no IPS match	no IPS match	no IPS match
TRUE	INTERPRO, BLASTED, MAPPED	g1567.t1	nicotine N-demethylase	493	4	3.49327e-39	47.61	12	P:GO:0010268; P:GO:0016125; P:GO:0016132; P:GO:0032259; F:GO:0004497; F:GO:0004796; F:GO:0005506; F:GO:0008168; F:GO:0016705; F:GO:0020037; F:GO:0046872; C:GO:0016020	P:brassinosteroid homeostasis; P:sterol metabolic process; P:brassinosteroid biosynthetic process; P:methylation; F:monooxygenase activity; F:thromboxane-A synthase activity; F:iron ion binding; F:methyltransferase activity; F:oxidoreductase activity, acting on paired donors, with incorporation or reduction of molecular oxygen; F:heme binding; F:metal ion binding; C:membrane			IPR001128 (PFAM)	P:GO:0055114; F:GO:0005506; F:GO:0016705; F:GO:0020037	P:obsolete oxidation-reduction process; F:iron ion binding; F:oxidoreductase activity, acting on paired donors, with incorporation or reduction of molecular oxygen; F:heme binding
TRUE	INTERPRO, BLASTED, MAPPED	g34819.t1	exocyst 70	641	1	1.0796e-123	57.9	4	P:GO:0006887; P:GO:0015031; F:GO:0005546; C:GO:0000145	P:exocytosis; P:protein transport; F:phosphatidylinositol-4,5-bisphosphate binding; C:exocyst			IPR012290 (PFAM); IPR024623 (PFAM); IPR019269 (PFAM); IPR019513 (PFAM); IPR007265 (PFAM); IPR004140 (PFAM); IPR015260 (PFAM)	P:GO:0006886; P:GO:0006887; P:GO:0007165; P:GO:0030168; P:GO:0048193; P:GO:0051258; F:GO:0005102; F:GO:0008134; F:GO:0030674; F:GO:0042803; F:GO:0070840; C:GO:0000145; C:GO:0005577; C:GO:0005801; C:GO:0016020	P:intracellular protein transport; P:exocytosis; P:signal transduction; P:platelet activation; P:Golgi vesicle transport; P:protein polymerization; F:signaling receptor binding; F:transcription factor binding; F:protein-macromolecule adaptor activity; F:protein homodimerization activity; F:dynein complex binding; C:exocyst; C:fibrinogen complex; C:cis-Golgi network; C:membrane
TRUE	INTERPRO, NO-BLAST	g39308.t2	---NA---	176									IPR000814 (PFAM)	P:GO:0006352; F:GO:0003677	P:DNA-templated transcription initiation; F:DNA binding
TRUE	INTERPRO, BLASTED, MAPPED, ANNOTATED	g28190.t1	histone 2b	119	2	6.40981e-33	81.82	5	F:GO:0003677; F:GO:0030527; F:GO:0046982; C:GO:0000786; C:GO:0005634	F:DNA binding; F:structural constituent of chromatin; F:protein heterodimerization activity; C:nucleosome; C:nucleus			IPR003958 (PFAM); IPR001623 (PFAM); IPR007125 (PFAM)	F:GO:0003677	F:DNA binding
TRUE	INTERPRO, NO-BLAST	g13291.t2	---NA---	497									IPR032690 (PFAM); IPR005828 (PFAM)	P:GO:0055085; F:GO:0022857; C:GO:0016020	P:transmembrane transport; F:transmembrane transporter activity; C:membrane
TRUE	INTERPRO, NO-BLAST	g34465.t1	---NA---	113									PF00428 (PFAM)	no GO terms	no GO terms
TRUE	INTERPRO, NO-BLAST	g38895.t1	---NA---	739									IPR026960 (PFAM); IPR000477 (PFAM)	no GO terms	no GO terms
TRUE	INTERPRO, NO-BLAST	g2007.t1	---NA---	451									IPR003411 (PFAM); IPR008845 (PFAM); IPR000198 (PFAM); IPR000095 (PFAM)	P:GO:0007165	P:signal transduction
TRUE	INTERPRO, NO-BLAST	g42921.t1	---NA---	220									IPR000315 (PFAM); IPR007706 (PFAM)	P:GO:0016032; F:GO:0008270; C:GO:0005622; C:GO:0042025	P:viral process; F:zinc ion binding; C:intracellular anatomical structure; C:host cell nucleus
TRUE	INTERPRO, BLASTED, MAPPED, ANNOTATED	g993.t1	9-lipoxygenase, partial	844	1	0	82.02	5	P:GO:0006633; P:GO:0031408; P:GO:0034440; F:GO:0016702; F:GO:0046872	P:fatty acid biosynthetic process; P:oxylipin biosynthetic process; P:lipid oxidation; F:oxidoreductase activity, acting on single donors with incorporation of molecular oxygen, incorporation of two atoms of oxygen; F:metal ion binding	EC:1.13.11	Acting on single donors with incorporation of molecular oxygen (oxygenases). The oxygen incorporated need not be derived from O2	IPR013819 (PFAM); IPR001024 (PFAM)	P:GO:0055114; F:GO:0005515; F:GO:0016702; F:GO:0046872	P:obsolete oxidation-reduction process; F:protein binding; F:oxidoreductase activity, acting on single donors with incorporation of molecular oxygen, incorporation of two atoms of oxygen; F:metal ion binding
TRUE	INTERPRO, NO-BLAST	g24178.t1	---NA---	424									IPR032263 (PFAM); IPR013650 (PFAM)	no GO terms	no GO terms
TRUE	INTERPRO, BLASTED, MAPPED, ANNOTATED	g43001.t1	glutathione transferase	221	4	3.23606e-94	79.66	4	P:GO:0006749; P:GO:0009734; F:GO:0004364; C:GO:0005829	P:glutathione metabolic process; P:auxin-activated signaling pathway; F:glutathione transferase activity; C:cytosol	EC:2.5.1.18	glutathione transferase	IPR004045 (PFAM); IPR004046 (PFAM)	F:GO:0005515	F:protein binding
TRUE	INTERPRO, NO-BLAST	g22200.t1	---NA---	853									IPR005135 (PFAM); IPR000477 (PFAM)	no GO terms	no GO terms
TRUE	INTERPRO, NO-BLAST	g31214.t2	---NA---	192									IPR001789 (PFAM)	P:GO:0000160	P:phosphorelay signal transduction system
TRUE	INTERPRO, NO-BLAST	g35350.t1	---NA---	446									IPR031646 (PFAM)	no GO terms	no GO terms
TRUE	INTERPRO, NO-BLAST	g29890.t1	---NA---	310									IPR006502 (PFAM); IPR021786 (PFAM)	no GO terms	no GO terms
TRUE	INTERPRO, BLASTED, MAPPED, ANNOTATED	g22734.t1	5-epi-aristolochene synthase	553	4	0	82.14	4	P:GO:0016102; F:GO:0000287; F:GO:0010333; C:GO:0005737	P:diterpenoid biosynthetic process; F:magnesium ion binding; F:terpene synthase activity; C:cytoplasm	EC:4.2.3	Carbon-oxygen lyases	IPR005630 (PFAM); IPR001906 (PFAM); IPR005187 (PFAM)	P:GO:0008152; F:GO:0000287; F:GO:0010333; F:GO:0016829	P:metabolic process; F:magnesium ion binding; F:terpene synthase activity; F:lyase activity
TRUE	INTERPRO, NO-BLAST	g24001.t1	---NA---	474									no IPS match	no IPS match	no IPS match
TRUE	INTERPRO, BLASTED, MAPPED, ANNOTATED	g26023.t1	clade XI lectin receptor kinase	657	20	0	66.37	7	P:GO:0002229; P:GO:0007178; P:GO:0042742; F:GO:0004675; F:GO:0005524; F:GO:0030246; C:GO:0005886	P:defense response to oomycetes; P:cell surface receptor protein serine/threonine kinase signaling pathway; P:defense response to bacterium; F:transmembrane receptor protein serine/threonine kinase activity; F:ATP binding; F:carbohydrate binding; C:plasma membrane	EC:2.7.11.1; EC:2.7.11.30	non-specific serine/threonine protein kinase; receptor protein serine/threonine kinase	IPR000719 (PFAM); IPR001220 (PFAM)	P:GO:0006468; F:GO:0004672; F:GO:0005524; F:GO:0030246	P:protein phosphorylation; F:protein kinase activity; F:ATP binding; F:carbohydrate binding
TRUE	INTERPRO, NO-BLAST	g1812.t4	---NA---	617									no IPS match	no IPS match	no IPS match
TRUE	INTERPRO, NO-BLAST	g5509.t1	---NA---	135									IPR027885 (PFAM); IPR025322 (PFAM)	no GO terms	no GO terms
TRUE	INTERPRO, NO-BLAST	g45570.t1	---NA---	201									IPR003959 (PFAM)	F:GO:0005524	F:ATP binding
TRUE	INTERPRO, BLASTED, MAPPED, ANNOTATED	g45929.t1	calmodulin-7	537	20	8.07027e-170	51.53	10	P:GO:0010099; P:GO:0035556; P:GO:0050832; F:GO:0004674; F:GO:0005515; F:GO:0046872; F:GO:0097159; C:GO:0005634; C:GO:0005737; C:GO:0005886	P:regulation of photomorphogenesis; P:intracellular signal transduction; P:defense response to fungus; F:protein serine/threonine kinase activity; F:protein binding; F:metal ion binding; F:organic cyclic compound binding; C:nucleus; C:cytoplasm; C:plasma membrane	EC:2.7.11.1	non-specific serine/threonine protein kinase	IPR000719 (PFAM); IPR021649 (PFAM); IPR014459 (PFAM); IPR002048 (PFAM)	P:GO:0006468; F:GO:0004672; F:GO:0005509; F:GO:0005524	P:protein phosphorylation; F:protein kinase activity; F:calcium ion binding; F:ATP binding
TRUE	INTERPRO, BLASTED, MAPPED	g43092.t1	plastid NEP interaction protein	523	2	4.89934e-11	58.39	2	F:GO:0046872; F:GO:0061630	F:metal ion binding; F:ubiquitin protein ligase activity			IPR001841 (PFAM); IPR010696 (PFAM)	F:GO:0005515; F:GO:0008270	F:protein binding; F:zinc ion binding
TRUE	INTERPRO, NO-BLAST	g3014.t2	---NA---	412									IPR000257 (PFAM)	P:GO:0006779; F:GO:0004853	P:porphyrin-containing compound biosynthetic process; F:uroporphyrinogen decarboxylase activity
TRUE	INTERPRO, NO-BLAST	g20842.t1	---NA---	439									IPR025064 (PFAM); IPR000048 (PFAM)	F:GO:0005515	F:protein binding
TRUE	INTERPRO, BLASTED, MAPPED	g13434.t1	nine-cis-epoxycarotenoid dioxygenase-like protein	547	1	4.94525e-66	60.63	6	P:GO:0016121; F:GO:0010436; F:GO:0016702; F:GO:0046872; F:GO:0051213; C:GO:0009570	P:carotene catabolic process; F:carotenoid dioxygenase activity; F:oxidoreductase activity, acting on single donors with incorporation of molecular oxygen, incorporation of two atoms of oxygen; F:metal ion binding; F:dioxygenase activity; C:chloroplast stroma			IPR004294 (PFAM)	P:GO:0055114; F:GO:0016702	P:obsolete oxidation-reduction process; F:oxidoreductase activity, acting on single donors with incorporation of molecular oxygen, incorporation of two atoms of oxygen
TRUE	INTERPRO, NO-BLAST	g15823.t1	---NA---	263									IPR008183 (PFAM)	P:GO:0005975; F:GO:0016853	P:carbohydrate metabolic process; F:isomerase activity
TRUE	INTERPRO, NO-BLAST	g46025.t1	---NA---	130									no IPS match	no IPS match	no IPS match
TRUE	INTERPRO, NO-BLAST	g24799.t1	---NA---	460									IPR013103 (PFAM)	no GO terms	no GO terms
TRUE	INTERPRO, NO-BLAST	g28439.t1	---NA---	324									IPR029409 (PFAM)	no GO terms	no GO terms
TRUE	INTERPRO, NO-BLAST	g3738.t1	---NA---	92									PF00477 (PFAM)	no GO terms	no GO terms
TRUE	INTERPRO, BLASTED, MAPPED, ANNOTATED	g25488.t1	clade XVII lectin receptor kinase	667	20	6.15865e-30	56.45	6	P:GO:0006952; P:GO:0007165; P:GO:0051707; F:GO:0004672; F:GO:0005524; C:GO:0005737	P:defense response; P:signal transduction; P:response to other organism; F:protein kinase activity; F:ATP binding; C:cytoplasm	EC:2.7.1	Transferring phosphorus-containing groups	IPR013767 (PFAM); IPR001245 (PFAM)	P:GO:0006355; P:GO:0006468; F:GO:0004672	P:regulation of DNA-templated transcription; P:protein phosphorylation; F:protein kinase activity
TRUE	INTERPRO, NO-BLAST	g17200.t2	---NA---	229									IPR021998 (PFAM); IPR004146 (PFAM); IPR031946 (PFAM); IPR019787 (PFAM); IPR013137 (PFAM); IPR001841 (PFAM)	P:GO:0006355; F:GO:0005515; F:GO:0008270; F:GO:0042393	P:regulation of DNA-templated transcription; F:protein binding; F:zinc ion binding; F:histone binding
TRUE	INTERPRO, NO-BLAST	g11060.t1	---NA---	466									IPR001005 (PFAM); PF13921 (PFAM)	no GO terms	no GO terms
TRUE	INTERPRO, NO-BLAST	g21817.t6	---NA---	158									IPR005176 (PFAM)	no GO terms	no GO terms
TRUE	INTERPRO, NO-BLAST	g10533.t1	---NA---	172									IPR006461 (PFAM)	no GO terms	no GO terms
TRUE	INTERPRO, NO-BLAST	g33916.t1	---NA---	401									IPR000477 (PFAM)	no GO terms	no GO terms
TRUE	INTERPRO, NO-BLAST	g25680.t1	---NA---	550									PF14568 (PFAM); IPR005512 (PFAM)	F:GO:0005085	F:guanyl-nucleotide exchange factor activity
TRUE	INTERPRO, NO-BLAST	g4238.t1	---NA---	161									IPR019587 (PFAM)	no GO terms	no GO terms
TRUE	INTERPRO	g12912.t1		249									IPR031343 (PFAM); IPR001377 (PFAM)	P:GO:0006412; F:GO:0003735; C:GO:0005622; C:GO:0005840	P:translation; F:structural constituent of ribosome; C:intracellular anatomical structure; C:ribosome
TRUE	INTERPRO	g13219.t1		523									IPR003409 (PFAM)	no GO terms	no GO terms
TRUE	INTERPRO	g25054.t1		624									IPR001878 (PFAM); IPR025314 (PFAM); PF14223 (PFAM); IPR018757 (PFAM); IPR022043 (PFAM)	F:GO:0003676; F:GO:0008270	F:nucleic acid binding; F:zinc ion binding
TRUE	INTERPRO	g39171.t1		839									IPR007728 (PFAM); IPR018848 (PFAM); IPR001214 (PFAM)	P:GO:0034968; F:GO:0005515; F:GO:0008270; F:GO:0018024; C:GO:0005634	P:obsolete histone lysine methylation; F:protein binding; F:zinc ion binding; F:obsolete histone lysine N-methyltransferase activity; C:nucleus
TRUE	INTERPRO	g28852.t1		323									no IPS match	no IPS match	no IPS match
TRUE	INTERPRO	g17609.t1		510									IPR000195 (PFAM); PF02389 (PFAM)	no GO terms	no GO terms
TRUE	INTERPRO	g7607.t1		171									IPR028973 (PFAM); IPR004360 (PFAM)	no GO terms	no GO terms
TRUE	INTERPRO	g41141.t1		364									no IPS match	no IPS match	no IPS match
TRUE	INTERPRO	g3201.t2		124									PF17181 (PFAM)	no GO terms	no GO terms
TRUE	INTERPRO	g38015.t1		161									IPR024630 (PFAM); IPR008004 (PFAM)	no GO terms	no GO terms
TRUE	INTERPRO	g1863.t1		426									IPR008507 (PFAM); IPR001103 (PFAM); IPR021950 (PFAM); IPR028065 (PFAM)	P:GO:0006355; P:GO:0030521; F:GO:0003677; F:GO:0003712; F:GO:0004879; F:GO:0005496; C:GO:0000124; C:GO:0005634	P:regulation of DNA-templated transcription; P:androgen receptor signaling pathway; F:DNA binding; F:transcription coregulator activity; F:nuclear receptor activity; F:steroid binding; C:SAGA complex; C:nucleus
TRUE	INTERPRO	g14169.t1		284									IPR000801 (PFAM)	no GO terms	no GO terms
TRUE	INTERPRO	g14126.t1		767									IPR005049 (PFAM)	no GO terms	no GO terms
TRUE	INTERPRO	g28536.t1		446									PF00009 (PFAM); IPR000630 (PFAM); IPR004161 (PFAM); IPR004160 (PFAM)	P:GO:0006412; F:GO:0003735; F:GO:0005525; C:GO:0005840	P:translation; F:structural constituent of ribosome; F:GTP binding; C:ribosome
TRUE	INTERPRO	g14270.t1		400									IPR028203 (PFAM)	no GO terms	no GO terms
TRUE	INTERPRO	g30860.t1		448									IPR028045 (PFAM)	no GO terms	no GO terms
TRUE	INTERPRO	g40665.t1		425									IPR026960 (PFAM)	no GO terms	no GO terms
TRUE	INTERPRO	g7260.t1		524									IPR005607 (PFAM)	no GO terms	no GO terms
TRUE	INTERPRO	g45033.t1		182									IPR021793 (PFAM); IPR025648 (PFAM); IPR034026 (PFAM); IPR014198 (PFAM); IPR007250 (PFAM); IPR010279 (PFAM); IPR031877 (PFAM)	P:GO:0006950; F:GO:0046872	P:response to stress; F:metal ion binding
TRUE	INTERPRO	g29775.t1		108									no IPS match	no IPS match	no IPS match
TRUE	INTERPRO	g21152.t1		294									IPR000757 (PFAM); IPR010713 (PFAM)	P:GO:0005975; P:GO:0006073; F:GO:0004553; F:GO:0016762; C:GO:0005618; C:GO:0048046	P:carbohydrate metabolic process; P:obsolete cellular glucan metabolic process; F:hydrolase activity, hydrolyzing O-glycosyl compounds; F:xyloglucan:xyloglucosyl transferase activity; C:cell wall; C:apoplast
TRUE	INTERPRO	g28554.t1		106									IPR000477 (PFAM)	no GO terms	no GO terms
TRUE	INTERPRO	g5421.t1		491									PF13428 (PFAM); IPR001245 (PFAM); IPR013105 (PFAM)	P:GO:0006468; F:GO:0004672	P:protein phosphorylation; F:protein kinase activity
TRUE	INTERPRO	g18378.t1		578									IPR000109 (PFAM); IPR025367 (PFAM); IPR019713 (PFAM)	P:GO:0006810; F:GO:0005215; C:GO:0016020	P:transport; F:transporter activity; C:membrane
TRUE	INTERPRO	g1679.t1		1170									IPR025724 (PFAM); IPR001584 (PFAM); IPR013103 (PFAM)	P:GO:0015074	P:DNA integration
TRUE	INTERPRO	g31658.t1		113									IPR003676 (PFAM)	P:GO:0009733	P:response to auxin
TRUE	INTERPRO	g31906.t1		235									IPR004176 (PFAM)	P:GO:0019538	P:protein metabolic process
TRUE	INTERPRO	g24372.t1		316									IPR000719 (PFAM)	P:GO:0006468; F:GO:0004672; F:GO:0005524	P:protein phosphorylation; F:protein kinase activity; F:ATP binding
TRUE	INTERPRO	g5123.t1		484									IPR032640 (PFAM); IPR000644 (PFAM)	no GO terms	no GO terms
TRUE	INTERPRO	g2261.t1		338									PF14223 (PFAM); IPR001878 (PFAM); IPR007671 (PFAM)	F:GO:0003676; F:GO:0008270	F:nucleic acid binding; F:zinc ion binding
TRUE	INTERPRO	g9918.t1		778									IPR003656 (PFAM); IPR025525 (PFAM); IPR008906 (PFAM); IPR007021 (PFAM)	F:GO:0003677; F:GO:0046983	F:DNA binding; F:protein dimerization activity
TRUE	INTERPRO	g29013.t2		227									IPR010307 (PFAM); IPR011453 (PFAM); IPR012926 (PFAM); IPR002164 (PFAM); IPR032017 (PFAM); IPR005632 (PFAM)	P:GO:0006334; P:GO:0007155; F:GO:0051082; C:GO:0005634; C:GO:0016020	P:nucleosome assembly; P:cell adhesion; F:unfolded protein binding; C:nucleus; C:membrane
TRUE	INTERPRO	g38929.t1		316									IPR017395 (PFAM)	P:GO:0015996; F:GO:0047746	P:chlorophyll catabolic process; F:chlorophyllase activity
TRUE	INTERPRO	g31295.t1		744									IPR000160 (PFAM); IPR000477 (PFAM)	no GO terms	no GO terms
TRUE	INTERPRO	g37260.t1		175									IPR008914 (PFAM)	no GO terms	no GO terms
TRUE	INTERPRO	g7693.t1		331									PF14223 (PFAM)	no GO terms	no GO terms
TRUE	INTERPRO	g18683.t1		338									PF14223 (PFAM); IPR001878 (PFAM)	F:GO:0003676; F:GO:0008270	F:nucleic acid binding; F:zinc ion binding
TRUE	INTERPRO	g11228.t1		233									IPR008906 (PFAM)	F:GO:0046983	F:protein dimerization activity
TRUE	INTERPRO	g4939.t1		550									IPR011705 (PFAM); IPR000210 (PFAM)	F:GO:0005515	F:protein binding
TRUE	INTERPRO	g7379.t1		338									IPR001878 (PFAM); PF14223 (PFAM)	F:GO:0003676; F:GO:0008270	F:nucleic acid binding; F:zinc ion binding
TRUE	INTERPRO	g34349.t1		143									IPR018289 (PFAM)	no GO terms	no GO terms
TRUE	INTERPRO	g7060.t1		297									IPR025314 (PFAM); IPR031848 (PFAM); IPR001878 (PFAM); PF14223 (PFAM)	P:GO:0001558; F:GO:0003676; F:GO:0003700; F:GO:0008270; F:GO:0097351	P:regulation of cell growth; F:nucleic acid binding; F:DNA-binding transcription factor activity; F:zinc ion binding; F:toxin sequestering activity
TRUE	INTERPRO	g25043.t1		600									IPR004330 (PFAM); IPR007527 (PFAM); IPR018289 (PFAM)	F:GO:0008270	F:zinc ion binding
TRUE	INTERPRO	g20015.t1		406									IPR001245 (PFAM); IPR025213 (PFAM)	P:GO:0006468; F:GO:0004672	P:protein phosphorylation; F:protein kinase activity
TRUE	INTERPRO	g13305.t1		658									IPR015940 (PFAM)	no GO terms	no GO terms
TRUE	INTERPRO	g20576.t1		778									IPR008906 (PFAM); IPR007021 (PFAM); IPR025525 (PFAM); IPR003656 (PFAM)	F:GO:0003677; F:GO:0046983	F:DNA binding; F:protein dimerization activity
TRUE	INTERPRO	g8731.t1		78									IPR008700 (PFAM)	no GO terms	no GO terms
TRUE	INTERPRO	g3276.t1		78									IPR008700 (PFAM)	no GO terms	no GO terms
TRUE	INTERPRO	g13339.t1		305									IPR001878 (PFAM); PF14223 (PFAM); IPR025314 (PFAM)	F:GO:0003676; F:GO:0008270	F:nucleic acid binding; F:zinc ion binding
TRUE	INTERPRO	g30494.t1		1165									IPR001584 (PFAM); IPR013103 (PFAM); IPR025724 (PFAM)	P:GO:0015074	P:DNA integration
TRUE	INTERPRO	g10550.t1		605									IPR010941 (PFAM); IPR002423 (PFAM)	P:GO:0042619; F:GO:0005524	P:poly-hydroxybutyrate biosynthetic process; F:ATP binding
TRUE	INTERPRO	g29902.t1		231									IPR018957 (PFAM)	F:GO:0046872	F:metal ion binding
TRUE	INTERPRO	g12515.t1		155									IPR031488 (PFAM); IPR021137 (PFAM)	P:GO:0006412; F:GO:0003735; C:GO:0005622; C:GO:0005840	P:translation; F:structural constituent of ribosome; C:intracellular anatomical structure; C:ribosome
TRUE	INTERPRO	g20624.t1		222									IPR002156 (PFAM)	F:GO:0003676; F:GO:0004523	F:nucleic acid binding; F:RNA-DNA hybrid ribonuclease activity
TRUE	INTERPRO	g43757.t1		514									IPR004263 (PFAM); IPR001503 (PFAM)	P:GO:0006486; F:GO:0008417; C:GO:0016020	P:protein glycosylation; F:fucosyltransferase activity; C:membrane
TRUE	INTERPRO	g38347.t1		192									IPR004948 (PFAM)	F:GO:0098519	F:obsolete nucleotide phosphatase activity, acting on free nucleotides
TRUE	INTERPRO	g3081.t1		624									PF14223 (PFAM); IPR025314 (PFAM); IPR001878 (PFAM); IPR001878 (PFAM)	F:GO:0003676; F:GO:0008270	F:nucleic acid binding; F:zinc ion binding
TRUE	INTERPRO	g7458.t1		171									no IPS match	no IPS match	no IPS match
TRUE	INTERPRO	g44500.t1		973									IPR003100 (PFAM); IPR032473 (PFAM); IPR014811 (PFAM); IPR003165 (PFAM); IPR032474 (PFAM); IPR032472 (PFAM)	F:GO:0003676; F:GO:0005515	F:nucleic acid binding; F:protein binding
TRUE	INTERPRO	g40228.t2		422									IPR032400 (PFAM); IPR025066 (PFAM); IPR000504 (PFAM)	F:GO:0003676	F:nucleic acid binding
TRUE	INTERPRO	g18404.t1		207									IPR031606 (PFAM); IPR022552 (PFAM)	P:GO:0071805; F:GO:0015079; C:GO:0005886	P:potassium ion transmembrane transport; F:potassium ion transmembrane transporter activity; C:plasma membrane
TRUE	INTERPRO	g3511.t1		103									IPR008906 (PFAM)	F:GO:0046983	F:protein dimerization activity
TRUE	INTERPRO	g10320.t1		191									IPR001471 (PFAM)	P:GO:0006355; F:GO:0003700	P:regulation of DNA-templated transcription; F:DNA-binding transcription factor activity
TRUE	INTERPRO	g4059.t2		2172									IPR008395 (PFAM)	no GO terms	no GO terms
TRUE	INTERPRO	g25185.t1		805									IPR013198 (PFAM); IPR015211 (PFAM); IPR000368 (PFAM); IPR001296 (PFAM)	P:GO:0005985; F:GO:0008237; F:GO:0008270; F:GO:0016157	P:sucrose metabolic process; F:metallopeptidase activity; F:zinc ion binding; F:sucrose synthase activity
TRUE	INTERPRO	g19672.t1		421									IPR013650 (PFAM); IPR011226 (PFAM); IPR005811 (PFAM)	P:GO:0008152; F:GO:0003824	P:metabolic process; F:catalytic activity
TRUE	INTERPRO	g12559.t1		184									no IPS match	no IPS match	no IPS match
TRUE	INTERPRO	g12855.t1		260									IPR001878 (PFAM); PF14223 (PFAM)	F:GO:0003676; F:GO:0008270	F:nucleic acid binding; F:zinc ion binding
TRUE	INTERPRO	g15301.t1		298									IPR001480 (PFAM)	no GO terms	no GO terms
TRUE	INTERPRO	g39645.t2		480									IPR007071 (PFAM); PF12874 (PFAM)	F:GO:0003677; C:GO:0005634	F:DNA binding; C:nucleus
TRUE	INTERPRO	g7738.t1		217									IPR003656 (PFAM); IPR019688 (PFAM)	F:GO:0003677	F:DNA binding
TRUE	INTERPRO	g38680.t1		445									IPR000195 (PFAM)	no GO terms	no GO terms
TRUE	INTERPRO	g19189.t1		838									IPR022241 (PFAM); IPR032570 (PFAM); PF06818 (PFAM); IPR007662 (PFAM); IPR013253 (PFAM); IPR007451 (PFAM); IPR019515 (PFAM); IPR019465 (PFAM)	P:GO:0006891; C:GO:0017119	P:intra-Golgi vesicle-mediated transport; C:Golgi transport complex
TRUE	INTERPRO	g23720.t1		198									IPR022796 (PFAM)	no GO terms	no GO terms
TRUE	INTERPRO	g20662.t1		2234									IPR007452 (PFAM)	no GO terms	no GO terms
TRUE	INTERPRO	g22083.t1		636									IPR019378 (PFAM); IPR005069 (PFAM); IPR000504 (PFAM)	F:GO:0003676	F:nucleic acid binding
TRUE	INTERPRO	g14894.t1		771									IPR008906 (PFAM); IPR025525 (PFAM); IPR007021 (PFAM); IPR003656 (PFAM)	F:GO:0003677; F:GO:0046983	F:DNA binding; F:protein dimerization activity
TRUE	INTERPRO	g28867.t1		260									IPR023410 (PFAM); IPR000145 (PFAM); IPR018445 (PFAM)	F:GO:0005198; C:GO:0019028	F:structural molecule activity; C:viral capsid
TRUE	INTERPRO	g37369.t1		211									IPR003958 (PFAM)	no GO terms	no GO terms
TRUE	INTERPRO	g34507.t1		567									IPR011488 (PFAM); IPR025314 (PFAM); IPR001878 (PFAM); PF14223 (PFAM)	F:GO:0003676; F:GO:0003723; F:GO:0003743; F:GO:0008270	F:nucleic acid binding; F:RNA binding; F:translation initiation factor activity; F:zinc ion binding
TRUE	INTERPRO	g23470.t1		656									IPR019145 (PFAM); IPR004140 (PFAM); IPR010442 (PFAM); IPR007265 (PFAM)	P:GO:0006357; P:GO:0006886; P:GO:0006887; F:GO:0003712; F:GO:0008270; C:GO:0000145; C:GO:0005801; C:GO:0016020; C:GO:0016592	P:regulation of transcription by RNA polymerase II; P:intracellular protein transport; P:exocytosis; F:transcription coregulator activity; F:zinc ion binding; C:exocyst; C:cis-Golgi network; C:membrane; C:mediator complex
TRUE	INTERPRO	g25782.t1		301									IPR025607 (PFAM); IPR005485 (PFAM)	P:GO:0006412; F:GO:0003735; F:GO:0008097; C:GO:0005622; C:GO:0005840	P:translation; F:structural constituent of ribosome; F:5S rRNA binding; C:intracellular anatomical structure; C:ribosome
TRUE	INTERPRO	g31563.t2		249									IPR000010 (PFAM); IPR000010 (PFAM)	F:GO:0004869	F:cysteine-type endopeptidase inhibitor activity
TRUE	INTERPRO	g664.t1		190									IPR024766 (PFAM)	F:GO:0008270	F:zinc ion binding
TRUE	INTERPRO	g44288.t1		348									IPR001471 (PFAM)	P:GO:0006355; F:GO:0003700	P:regulation of DNA-templated transcription; F:DNA-binding transcription factor activity
TRUE	INTERPRO	g32652.t4		241									IPR023410 (PFAM); IPR000145 (PFAM); IPR010845 (PFAM)	P:GO:0044781; F:GO:0005198; C:GO:0019028	P:bacterial-type flagellum organization; F:structural molecule activity; C:viral capsid
TRUE	INTERPRO	g40226.t1		320									IPR003609 (PFAM)	no GO terms	no GO terms
TRUE	INTERPRO	g8815.t1		74									no IPS match	no IPS match	no IPS match
TRUE	INTERPRO	g41606.t1		218									no IPS match	no IPS match	no IPS match
TRUE	INTERPRO	g1290.t1		351									IPR008521 (PFAM)	P:GO:0015693; F:GO:0015095; C:GO:0016020	P:magnesium ion transport; F:magnesium ion transmembrane transporter activity; C:membrane
TRUE	INTERPRO	g45363.t1		108									no IPS match	no IPS match	no IPS match
TRUE	INTERPRO	g18809.t1		338									IPR007671 (PFAM); IPR001878 (PFAM); PF14223 (PFAM)	F:GO:0003676; F:GO:0008270	F:nucleic acid binding; F:zinc ion binding
TRUE	INTERPRO	g38078.t1		248									IPR009492 (PFAM); IPR032563 (PFAM); IPR015195 (PFAM); IPR001005 (PFAM); IPR031792 (PFAM)	P:GO:0006338; F:GO:0003676; F:GO:0005524; F:GO:0016818; C:GO:0005634	P:chromatin remodeling; F:nucleic acid binding; F:ATP binding; F:hydrolase activity, acting on acid anhydrides, in phosphorus-containing anhydrides; C:nucleus
TRUE	INTERPRO	g7941.t1		551									IPR025110 (PFAM); IPR000873 (PFAM)	P:GO:0008152; F:GO:0003824	P:metabolic process; F:catalytic activity
TRUE	INTERPRO	g11014.t1		398									IPR007312 (PFAM)	F:GO:0016788	F:hydrolase activity, acting on ester bonds
TRUE	INTERPRO	g40135.t1		222									IPR002659 (PFAM)	P:GO:0006486; F:GO:0008378; C:GO:0016020	P:protein glycosylation; F:galactosyltransferase activity; C:membrane
TRUE	INTERPRO	g38023.t1		361									no IPS match	no IPS match	no IPS match
TRUE	INTERPRO	g2463.t1		1035									IPR013713 (PFAM); IPR019399 (PFAM); IPR015158 (PFAM); IPR013598 (PFAM); IPR001494 (PFAM)	P:GO:0006886; F:GO:0031267	P:intracellular protein transport; F:small GTPase binding
TRUE	INTERPRO	g5667.t1		289									IPR025934 (PFAM); IPR007052 (PFAM)	no GO terms	no GO terms
TRUE	INTERPRO	g25170.t1		338									PF14223 (PFAM); IPR001878 (PFAM)	F:GO:0003676; F:GO:0008270	F:nucleic acid binding; F:zinc ion binding
TRUE	INTERPRO	g20455.t3		507									IPR015940 (PFAM); IPR018778 (PFAM); IPR000719 (PFAM); IPR001772 (PFAM)	P:GO:0006468; F:GO:0004672; F:GO:0005524	P:protein phosphorylation; F:protein kinase activity; F:ATP binding
TRUE	INTERPRO	g2597.t1		147									IPR006121 (PFAM); IPR010758 (PFAM)	P:GO:0030001; P:GO:0055114; F:GO:0016491; F:GO:0046872	P:metal ion transport; P:obsolete oxidation-reduction process; F:oxidoreductase activity; F:metal ion binding
TRUE	INTERPRO	g20199.t1		759									IPR032696 (PFAM); IPR032697 (PFAM); IPR015362 (PFAM)	no GO terms	no GO terms
TRUE	INTERPRO	g43849.t1		251									IPR023780 (PFAM)	no GO terms	no GO terms
TRUE	INTERPRO	g24732.t1		141									IPR025136 (PFAM); IPR013042 (PFAM); IPR012592 (PFAM); IPR010633 (PFAM); IPR004252 (PFAM)	P:GO:0000398	P:mRNA splicing, via spliceosome
TRUE	INTERPRO	g44465.t1		1202									IPR005479 (PFAM); IPR013651 (PFAM); IPR005480 (PFAM); IPR004218 (PFAM); IPR011607 (PFAM); PF13535 (PFAM)	P:GO:0006750; F:GO:0004363; F:GO:0005524	P:glutathione biosynthetic process; F:glutathione synthase activity; F:ATP binding
TRUE	INTERPRO	g30002.t1		453									IPR011598 (PFAM); IPR005683 (PFAM)	P:GO:0006886; F:GO:0046983; C:GO:0005741	P:intracellular protein transport; F:protein dimerization activity; C:mitochondrial outer membrane
TRUE	INTERPRO	g14699.t1		153									IPR022023 (PFAM); IPR010633 (PFAM); IPR004252 (PFAM); IPR025136 (PFAM); IPR015310 (PFAM); IPR007700 (PFAM); IPR006668 (PFAM); IPR000863 (PFAM)	F:GO:0001671; F:GO:0008146; F:GO:0051087	F:ATPase activator activity; F:sulfotransferase activity; F:protein-folding chaperone binding
TRUE	INTERPRO	g32891.t1		351									PF13920 (PFAM); IPR006845 (PFAM)	no GO terms	no GO terms
TRUE	INTERPRO	g6036.t1		110									IPR009292 (PFAM); IPR025745 (PFAM)	P:GO:0000469	P:obsolete cleavage involved in rRNA processing
TRUE	INTERPRO	g6889.t1		265									IPR003388 (PFAM); IPR016900 (PFAM)	P:GO:0006488; F:GO:0004583; C:GO:0005789	P:dolichol-linked oligosaccharide biosynthetic process; F:dolichyl-phosphate-glucose-glycolipid alpha-glucosyltransferase activity; C:endoplasmic reticulum membrane
TRUE	INTERPRO	g3346.t1		450									IPR025314 (PFAM); PF14223 (PFAM); IPR001878 (PFAM)	F:GO:0003676; F:GO:0008270	F:nucleic acid binding; F:zinc ion binding
TRUE	INTERPRO	g36636.t1		333									IPR001279 (PFAM)	no GO terms	no GO terms
TRUE	INTERPRO	g14462.t1		933									IPR007276 (PFAM); IPR005343 (PFAM)	C:GO:0032040	C:small-subunit processome
TRUE	INTERPRO	g24671.t1		283									IPR013078 (PFAM)	no GO terms	no GO terms
TRUE	INTERPRO	g1137.t1		100									no IPS match	no IPS match	no IPS match
TRUE	INTERPRO	g42814.t1		123									IPR022082 (PFAM)	no GO terms	no GO terms
TRUE	INTERPRO	g9601.t1		301									IPR001584 (PFAM)	P:GO:0015074	P:DNA integration
TRUE	INTERPRO	g25985.t1		1325									IPR001878 (PFAM); IPR013103 (PFAM); IPR025724 (PFAM); PF14223 (PFAM); IPR001584 (PFAM)	P:GO:0015074; F:GO:0003676; F:GO:0008270	P:DNA integration; F:nucleic acid binding; F:zinc ion binding
TRUE	INTERPRO	g42201.t1		587									IPR019451 (PFAM); PF13513 (PFAM); IPR000357 (PFAM); PF13646 (PFAM)	F:GO:0005515	F:protein binding
TRUE	INTERPRO	g19875.t1		191									IPR000554 (PFAM); IPR018563 (PFAM)	P:GO:0006412; F:GO:0003735; C:GO:0005622; C:GO:0005840	P:translation; F:structural constituent of ribosome; C:intracellular anatomical structure; C:ribosome
TRUE	INTERPRO	g16884.t1		223									no IPS match	no IPS match	no IPS match
TRUE	INTERPRO	g15652.t1		458									IPR013057 (PFAM); IPR012609 (PFAM)	no GO terms	no GO terms
TRUE	INTERPRO	g43639.t1		700									IPR000719 (PFAM); IPR011576 (PFAM)	P:GO:0006468; P:GO:0055114; F:GO:0004672; F:GO:0004733; F:GO:0005524; F:GO:0010181	P:protein phosphorylation; P:obsolete oxidation-reduction process; F:protein kinase activity; F:pyridoxamine phosphate oxidase activity; F:ATP binding; F:FMN binding
TRUE	INTERPRO	g8412.t1		139									IPR018544 (PFAM)	no GO terms	no GO terms
TRUE	INTERPRO	g19506.t1		375									IPR001932 (PFAM)	F:GO:0003824	F:catalytic activity
TRUE	INTERPRO	g23731.t1		183									IPR006689 (PFAM)	F:GO:0005525	F:GTP binding
TRUE	INTERPRO	g26019.t1		338									PF14223 (PFAM); IPR001878 (PFAM)	F:GO:0003676; F:GO:0008270	F:nucleic acid binding; F:zinc ion binding
TRUE	INTERPRO	g40256.t1		132									PF14223 (PFAM)	no GO terms	no GO terms
TRUE	INTERPRO	g32797.t1		353									no IPS match	no IPS match	no IPS match
TRUE	INTERPRO	g20047.t1		223									IPR005024 (PFAM)	P:GO:0007034	P:vacuolar transport
TRUE	INTERPRO	g31630.t1		274									IPR025314 (PFAM); PF14223 (PFAM)	no GO terms	no GO terms
TRUE	INTERPRO	g15259.t1		358									no IPS match	no IPS match	no IPS match
TRUE	INTERPRO	g22119.t1		133									no IPS match	no IPS match	no IPS match
TRUE	INTERPRO	g39625.t1		929									PF13641 (PFAM); IPR004436 (PFAM)	P:GO:0006099; P:GO:0055114; F:GO:0004450	P:tricarboxylic acid cycle; P:obsolete oxidation-reduction process; F:isocitrate dehydrogenase (NADP+) activity
TRUE	INTERPRO	g25942.t3		390									IPR002022 (PFAM)	no GO terms	no GO terms
TRUE	INTERPRO	g29369.t1		151									IPR032760 (PFAM); IPR002016 (PFAM)	P:GO:0006979; P:GO:0055114; F:GO:0004601; F:GO:0020037	P:response to oxidative stress; P:obsolete oxidation-reduction process; F:peroxidase activity; F:heme binding
TRUE	INTERPRO	g22695.t1		144									IPR023780 (PFAM); IPR012560 (PFAM)	C:GO:0016020	C:membrane
TRUE	INTERPRO	g26659.t1		357									IPR019290 (PFAM); IPR024318 (PFAM); IPR004901 (PFAM)	P:GO:0030244; F:GO:0005515; F:GO:0016866; C:GO:0005634	P:cellulose biosynthetic process; F:protein binding; F:intramolecular transferase activity; C:nucleus
TRUE	INTERPRO	g42905.t1		235									IPR022092 (PFAM); IPR010377 (PFAM); IPR019366 (PFAM); IPR032519 (PFAM); IPR019513 (PFAM); IPR000580 (PFAM); IPR005646 (PFAM); IPR025554 (PFAM); IPR031681 (PFAM); IPR013252 (PFAM); IPR025254 (PFAM); IPR011598 (PFAM); IPR019347 (PFAM); IPR013253 (PFAM); PF15035 (PFAM); IPR019130 (PFAM); IPR021350 (PFAM); IPR032354 (PFAM); IPR012926 (PFAM); IPR009252 (PFAM); IPR032733 (PFAM); IPR016866 (PFAM); IPR00…	P:GO:0006260; P:GO:0006355; P:GO:0006914; P:GO:0043093; P:GO:0070206; P:GO:0090529; F:GO:0003700; F:GO:0008134; F:GO:0042803; F:GO:0046983; F:GO:0070840; C:GO:0005737; C:GO:0016020	P:DNA replication; P:regulation of DNA-templated transcription; P:autophagy; P:FtsZ-dependent cytokinesis; P:protein trimerization; P:cell septum assembly; F:DNA-binding transcription factor activity; F:transcription factor binding; F:protein homodimerization activity; F:protein dimerization activity; F:dynein complex binding; C:cytoplasm; C:membrane
TRUE	INTERPRO	g32737.t1		114									IPR014553 (PFAM); PF03656 (PFAM); IPR018721 (PFAM)	no GO terms	no GO terms
TRUE	INTERPRO	g39318.t1		428									IPR025521 (PFAM); IPR004314 (PFAM)	no GO terms	no GO terms
TRUE	INTERPRO	g21248.t1		353									no IPS match	no IPS match	no IPS match
TRUE	INTERPRO	g19393.t1		104									no IPS match	no IPS match	no IPS match
TRUE	INTERPRO	g20881.t1		340									IPR018108 (PFAM)	no GO terms	no GO terms
TRUE	INTERPRO	g38329.t1		338									PF14223 (PFAM); IPR001878 (PFAM)	F:GO:0003676; F:GO:0008270	F:nucleic acid binding; F:zinc ion binding
TRUE	INTERPRO	g12012.t1		194									IPR008217 (PFAM); IPR002293 (PFAM)	P:GO:0003333; F:GO:0015171; C:GO:0016020	P:amino acid transmembrane transport; F:amino acid transmembrane transporter activity; C:membrane
TRUE	INTERPRO	g38171.t1		481									IPR001206 (PFAM); IPR021056 (PFAM)	F:GO:0016301	F:kinase activity
TRUE	INTERPRO	g41802.t1		575									IPR018757 (PFAM); IPR001878 (PFAM); IPR005312 (PFAM); IPR031848 (PFAM); IPR007175 (PFAM); IPR013258 (PFAM); PF14223 (PFAM); IPR001878 (PFAM)	P:GO:0001558; F:GO:0003676; F:GO:0003700; F:GO:0008270; F:GO:0097351	P:regulation of cell growth; F:nucleic acid binding; F:DNA-binding transcription factor activity; F:zinc ion binding; F:toxin sequestering activity
TRUE	INTERPRO	g35817.t1		220									IPR003411 (PFAM); IPR009838 (PFAM); IPR004895 (PFAM)	P:GO:0000746; C:GO:0019867	P:obsolete conjugation; C:outer membrane
TRUE	INTERPRO	g36288.t1		504									IPR000719 (PFAM); PF14851 (PFAM)	P:GO:0006468; F:GO:0004672; F:GO:0005524	P:protein phosphorylation; F:protein kinase activity; F:ATP binding
TRUE	INTERPRO	g32055.t1		533									IPR008545 (PFAM)	no GO terms	no GO terms
TRUE	INTERPRO	g17025.t1		198									no IPS match	no IPS match	no IPS match
TRUE	INTERPRO	g35784.t1		342									PF14223 (PFAM); IPR001878 (PFAM)	F:GO:0003676; F:GO:0008270	F:nucleic acid binding; F:zinc ion binding
TRUE	INTERPRO	g6776.t1		236									no IPS match	no IPS match	no IPS match
TRUE	INTERPRO	g28962.t1		220									PF13920 (PFAM)	no GO terms	no GO terms
TRUE	INTERPRO	g42758.t1		466									IPR001932 (PFAM); IPR001315 (PFAM)	P:GO:0042981; F:GO:0003824	P:regulation of apoptotic process; F:catalytic activity
TRUE	INTERPRO	g16386.t1		154									no IPS match	no IPS match	no IPS match
TRUE	INTERPRO	g44890.t1		142									no IPS match	no IPS match	no IPS match
TRUE	INTERPRO	g28473.t1		596									IPR003613 (PFAM); IPR002130 (PFAM); IPR027799 (PFAM); IPR031790 (PFAM); IPR004181 (PFAM)	P:GO:0000413; P:GO:0006457; P:GO:0016567; F:GO:0003755; F:GO:0004842; F:GO:0008270	P:protein peptidyl-prolyl isomerization; P:protein folding; P:protein ubiquitination; F:peptidyl-prolyl cis-trans isomerase activity; F:ubiquitin-protein transferase activity; F:zinc ion binding
TRUE	INTERPRO	g22457.t1		711									IPR005160 (PFAM); IPR005161 (PFAM); IPR014893 (PFAM); IPR006164 (PFAM)	P:GO:0006303; F:GO:0003677; F:GO:0003678; F:GO:0016817	P:double-strand break repair via nonhomologous end joining; F:DNA binding; F:DNA helicase activity; F:hydrolase activity, acting on acid anhydrides
TRUE	INTERPRO	g18669.t1		438									IPR032799 (PFAM); IPR032861 (PFAM)	no GO terms	no GO terms
TRUE	INTERPRO	g23758.t1		154									no IPS match	no IPS match	no IPS match
TRUE	INTERPRO	g24185.t1		371									IPR006652 (PFAM); IPR001810 (PFAM); PF13964 (PFAM); IPR001810 (PFAM); PF13418 (PFAM)	F:GO:0005515	F:protein binding
TRUE	INTERPRO	g7124.t1		501									IPR001701 (PFAM)	P:GO:0005975; F:GO:0004553	P:carbohydrate metabolic process; F:hydrolase activity, hydrolyzing O-glycosyl compounds
TRUE	INTERPRO	g26796.t1		438									IPR007704 (PFAM)	P:GO:0006506; F:GO:0016758; C:GO:0016020	P:GPI anchor biosynthetic process; F:hexosyltransferase activity; C:membrane
TRUE	INTERPRO	g24855.t1		273									IPR000535 (PFAM); IPR032707 (PFAM)	no GO terms	no GO terms
TRUE	INTERPRO	g19148.t1		288									no IPS match	no IPS match	no IPS match
TRUE	INTERPRO	g32692.t1		239									IPR001128 (PFAM)	P:GO:0055114; F:GO:0005506; F:GO:0016705; F:GO:0020037	P:obsolete oxidation-reduction process; F:iron ion binding; F:oxidoreductase activity, acting on paired donors, with incorporation or reduction of molecular oxygen; F:heme binding
TRUE	INTERPRO	g20416.t1		526									IPR001245 (PFAM); IPR001611 (PFAM); IPR001611 (PFAM)	P:GO:0006468; F:GO:0004672; F:GO:0005515	P:protein phosphorylation; F:protein kinase activity; F:protein binding
TRUE	INTERPRO	g17696.t1		344									IPR000253 (PFAM)	F:GO:0005515	F:protein binding
TRUE	INTERPRO	g20200.t1		448									PF14223 (PFAM); IPR025314 (PFAM); PF17181 (PFAM); IPR001878 (PFAM)	F:GO:0003676; F:GO:0008270	F:nucleic acid binding; F:zinc ion binding
TRUE	INTERPRO	g39443.t1		409									IPR010418 (PFAM); IPR013888 (PFAM); IPR019734 (PFAM); PF14689 (PFAM); IPR002885 (PFAM); IPR021799 (PFAM); IPR002885 (PFAM)	F:GO:0005515	F:protein binding
TRUE	INTERPRO	g42177.t1		190									IPR032118 (PFAM); IPR009606 (PFAM); IPR012575 (PFAM)	F:GO:0003954; C:GO:0005739	F:NADH dehydrogenase activity; C:mitochondrion
TRUE	INTERPRO	g21759.t1		369									IPR001932 (PFAM); IPR001932 (PFAM)	F:GO:0003824	F:catalytic activity
TRUE	INTERPRO	g7893.t1		347									IPR003689 (PFAM); PF06664 (PFAM)	P:GO:0030001; P:GO:0055085; F:GO:0046873; C:GO:0016020	P:metal ion transport; P:transmembrane transport; F:metal ion transmembrane transporter activity; C:membrane
TRUE	INTERPRO	g24731.t1		540									PF14223 (PFAM); IPR025314 (PFAM); IPR001878 (PFAM); IPR022043 (PFAM)	F:GO:0003676; F:GO:0008270	F:nucleic acid binding; F:zinc ion binding
TRUE	INTERPRO	g19466.t1		778									IPR025525 (PFAM); IPR007021 (PFAM); IPR003656 (PFAM); IPR008906 (PFAM)	F:GO:0003677; F:GO:0046983	F:DNA binding; F:protein dimerization activity
TRUE	INTERPRO	g19412.t2		639									IPR000626 (PFAM); IPR000403 (PFAM)	F:GO:0005515; F:GO:0016301	F:protein binding; F:kinase activity
TRUE	INTERPRO	g37014.t1		226									no IPS match	no IPS match	no IPS match
TRUE	INTERPRO	g11666.t1		170									IPR006973 (PFAM)	P:GO:0000398; C:GO:0005681	P:mRNA splicing, via spliceosome; C:spliceosomal complex
TRUE	INTERPRO	g42502.t1		229									IPR004046 (PFAM); IPR004045 (PFAM)	F:GO:0005515	F:protein binding
TRUE	INTERPRO	g13411.t1		107									no IPS match	no IPS match	no IPS match
TRUE	INTERPRO	g5281.t1		227									IPR008906 (PFAM); IPR008257 (PFAM)	P:GO:0006508; F:GO:0016805; F:GO:0046983	P:proteolysis; F:dipeptidase activity; F:protein dimerization activity
TRUE	INTERPRO	g35000.t1		429									IPR013103 (PFAM)	no GO terms	no GO terms
TRUE	INTERPRO	g35399.t1		315									PF14223 (PFAM); IPR001878 (PFAM)	F:GO:0003676; F:GO:0008270	F:nucleic acid binding; F:zinc ion binding
TRUE	INTERPRO	g5177.t1		573									IPR000836 (PFAM); IPR029057 (PFAM); IPR017932 (PFAM); IPR021522 (PFAM)	P:GO:0006810; P:GO:0009116	P:transport; P:nucleoside metabolic process
TRUE	INTERPRO	g29475.t1		332									IPR007130 (PFAM)	F:GO:0016747	F:acyltransferase activity, transferring groups other than amino-acyl groups
TRUE	INTERPRO	g39239.t1		338									IPR001878 (PFAM); PF14223 (PFAM)	F:GO:0003676; F:GO:0008270	F:nucleic acid binding; F:zinc ion binding
TRUE	INTERPRO	g40363.t1		221									IPR006045 (PFAM)	F:GO:0045735	F:nutrient reservoir activity
TRUE	INTERPRO	g25481.t1		219									IPR008906 (PFAM); IPR022176 (PFAM)	F:GO:0046983	F:protein dimerization activity
TRUE	INTERPRO	g11126.t1		980									PF13191 (PFAM); IPR018835 (PFAM); PF13604 (PFAM); IPR011492 (PFAM); PF13086 (PFAM); PF13641 (PFAM); PF13087 (PFAM)	P:GO:0019079; F:GO:0004386; F:GO:0005524	P:viral genome replication; F:helicase activity; F:ATP binding
TRUE	INTERPRO	g5116.t1		423									PF13086 (PFAM); IPR003959 (PFAM); IPR025271 (PFAM)	F:GO:0005524	F:ATP binding
TRUE	INTERPRO	g43766.t1		199									no IPS match	no IPS match	no IPS match
TRUE	INTERPRO	g25211.t1		411									IPR010152 (PFAM); IPR000504 (PFAM); IPR002059 (PFAM)	P:GO:0006355; F:GO:0003676; F:GO:0003677	P:regulation of DNA-templated transcription; F:nucleic acid binding; F:DNA binding
TRUE	INTERPRO	g35704.t1		412									IPR033391 (PFAM)	no GO terms	no GO terms
TRUE	INTERPRO	g21261.t1		177									IPR003959 (PFAM); PF13238 (PFAM)	F:GO:0005524	F:ATP binding
TRUE	INTERPRO	g38346.t1		138									IPR009071 (PFAM); IPR009071 (PFAM)	no GO terms	no GO terms
TRUE	INTERPRO	g32248.t1		254									IPR003428 (PFAM)	C:GO:0005759	C:mitochondrial matrix
TRUE	INTERPRO	g35836.t1		571									IPR008545 (PFAM); IPR029294 (PFAM)	no GO terms	no GO terms
TRUE	INTERPRO	g6242.t1		759									IPR001680 (PFAM); IPR012953 (PFAM); IPR013255 (PFAM)	P:GO:0006364; F:GO:0005515	P:rRNA processing; F:protein binding
TRUE	INTERPRO	g3433.t1		339									IPR001878 (PFAM); PF14223 (PFAM)	F:GO:0003676; F:GO:0008270	F:nucleic acid binding; F:zinc ion binding
TRUE	INTERPRO	g38403.t3		389									IPR000007 (PFAM); IPR021916 (PFAM); IPR001810 (PFAM)	F:GO:0005515	F:protein binding
TRUE	INTERPRO	g14718.t1		316									PF14223 (PFAM); IPR007671 (PFAM); IPR001878 (PFAM)	F:GO:0003676; F:GO:0008270	F:nucleic acid binding; F:zinc ion binding
TRUE	INTERPRO	g8965.t1		169									no IPS match	no IPS match	no IPS match
TRUE	INTERPRO	g43882.t1		338									PF14223 (PFAM); IPR001878 (PFAM)	F:GO:0003676; F:GO:0008270	F:nucleic acid binding; F:zinc ion binding
TRUE	INTERPRO	g21895.t1		166									IPR018870 (PFAM)	no GO terms	no GO terms
TRUE	INTERPRO	g20225.t1		327									IPR001611 (PFAM); IPR025875 (PFAM); IPR001611 (PFAM)	F:GO:0005515	F:protein binding
TRUE	INTERPRO	g30503.t1		485									IPR022227 (PFAM); IPR007464 (PFAM)	P:GO:0042742; C:GO:0005576	P:defense response to bacterium; C:extracellular region
TRUE	INTERPRO	g25570.t1		437									IPR001680 (PFAM); PF02239 (PFAM)	F:GO:0005515	F:protein binding
TRUE	INTERPRO	g11622.t1		357									no IPS match	no IPS match	no IPS match
TRUE	INTERPRO	g36293.t1		251									IPR012946 (PFAM)	no GO terms	no GO terms
TRUE	INTERPRO	g4436.t1		569									IPR005512 (PFAM)	F:GO:0005085	F:guanyl-nucleotide exchange factor activity
TRUE	INTERPRO	g28822.t1		465									IPR001005 (PFAM)	no GO terms	no GO terms
TRUE	INTERPRO	g19786.t1		432									IPR013903 (PFAM); IPR002241 (PFAM)	P:GO:0005975; F:GO:0004553	P:carbohydrate metabolic process; F:hydrolase activity, hydrolyzing O-glycosyl compounds
TRUE	INTERPRO	g24593.t1		353									no IPS match	no IPS match	no IPS match
TRUE	INTERPRO	g33510.t1		384									IPR019533 (PFAM)	no GO terms	no GO terms
TRUE	INTERPRO	g22567.t1		1126									IPR013103 (PFAM); IPR001584 (PFAM); IPR025724 (PFAM)	P:GO:0015074	P:DNA integration
TRUE	INTERPRO	g18298.t1		84									IPR003465 (PFAM)	F:GO:0004867	F:serine-type endopeptidase inhibitor activity
TRUE	INTERPRO	g12624.t1		106									IPR004910 (PFAM)	no GO terms	no GO terms
TRUE	INTERPRO	g22988.t1		548									IPR011545 (PFAM); IPR001650 (PFAM)	F:GO:0003676; F:GO:0005524	F:nucleic acid binding; F:ATP binding
TRUE	INTERPRO	g18737.t1		984									IPR005378 (PFAM)	P:GO:0015031; P:GO:0042147; F:GO:0008565; C:GO:0030904	P:protein transport; P:retrograde transport, endosome to Golgi; F:obsolete protein transporter activity; C:retromer complex
TRUE	INTERPRO	g13596.t1		198									no IPS match	no IPS match	no IPS match
TRUE	INTERPRO	g25965.t1		212									IPR024131 (PFAM)	no GO terms	no GO terms
TRUE	INTERPRO	g11139.t1		351									IPR013563 (PFAM); IPR000571 (PFAM)	P:GO:0015833; F:GO:0000166; F:GO:0005524; F:GO:0046872	P:peptide transport; F:nucleotide binding; F:ATP binding; F:metal ion binding
TRUE	INTERPRO	g8634.t1		195									PF14223 (PFAM)	no GO terms	no GO terms
TRUE	INTERPRO	g1367.t1		351									no IPS match	no IPS match	no IPS match
TRUE	INTERPRO	g14091.t1		815									IPR002420 (PFAM); IPR000403 (PFAM); IPR001263 (PFAM); IPR002763 (PFAM)	F:GO:0016301	F:kinase activity
TRUE	INTERPRO	g12737.t1		543									IPR002156 (PFAM); IPR013103 (PFAM)	F:GO:0003676; F:GO:0004523	F:nucleic acid binding; F:RNA-DNA hybrid ribonuclease activity
TRUE	INTERPRO	g17223.t1		276									IPR013543 (PFAM); IPR009959 (PFAM); IPR008487 (PFAM); IPR001943 (PFAM)	P:GO:0006468; F:GO:0004683; F:GO:0005515; F:GO:0005516	P:protein phosphorylation; F:calcium/calmodulin-dependent protein kinase activity; F:protein binding; F:calmodulin binding
TRUE	INTERPRO	g39086.t1		216									IPR007631 (PFAM); IPR009636 (PFAM); IPR022091 (PFAM); IPR025593 (PFAM); IPR019143 (PFAM); IPR012926 (PFAM); IPR016866 (PFAM); PF15294 (PFAM); IPR013253 (PFAM); IPR007815 (PFAM); IPR007930 (PFAM); IPR007243 (PFAM); IPR008417 (PFAM); IPR010377 (PFAM); IPR012458 (PFAM); IPR007999 (PFAM); IPR013923 (PFAM)	P:GO:0006260; P:GO:0006352; P:GO:0006355; P:GO:0006886; P:GO:0006914; P:GO:0019069; P:GO:0046677; P:GO:0048870; F:GO:0003677; F:GO:0003700; F:GO:0016987; C:GO:0005783; C:GO:0016020; C:GO:0031514; C:GO:0046806	P:DNA replication; P:DNA-templated transcription initiation; P:regulation of DNA-templated transcription; P:intracellular protein transport; P:autophagy; P:viral capsid assembly; P:response to antibiotic; P:cell motility; F:DNA binding; F:DNA-binding transcription factor activity; F:sigma factor activity; C:endoplasmic reticulum; C:membrane; C:motile cilium; C:viral scaffold
TRUE	INTERPRO	g29011.t1		381									no IPS match	no IPS match	no IPS match
TRUE	INTERPRO	g9331.t1		177									IPR001878 (PFAM)	F:GO:0003676; F:GO:0008270	F:nucleic acid binding; F:zinc ion binding
TRUE	INTERPRO	g45477.t1		117									IPR023780 (PFAM)	no GO terms	no GO terms
TRUE	INTERPRO	g23716.t1		218									IPR009038 (PFAM); IPR010532 (PFAM)	P:GO:0006810; P:GO:0055114; F:GO:0005507; C:GO:0016020	P:transport; P:obsolete oxidation-reduction process; F:copper ion binding; C:membrane
TRUE	INTERPRO	g28983.t1		461									IPR000504 (PFAM); IPR002075 (PFAM)	P:GO:0006810; F:GO:0003676; C:GO:0005622	P:transport; F:nucleic acid binding; C:intracellular anatomical structure
TRUE	INTERPRO	g27328.t1		191									IPR025322 (PFAM)	no GO terms	no GO terms
TRUE	INTERPRO	g37020.t1		276									no IPS match	no IPS match	no IPS match
TRUE	INTERPRO	g24559.t1		888									IPR019160 (PFAM); IPR028258 (PFAM); IPR021496 (PFAM)	P:GO:0006887; C:GO:0000145	P:exocytosis; C:exocyst
TRUE	INTERPRO	g3400.t2		474									IPR007676 (PFAM)	P:GO:0006486; F:GO:0004579; C:GO:0005783; C:GO:0016020	P:protein glycosylation; F:dolichyl-diphosphooligosaccharide-protein glycotransferase activity; C:endoplasmic reticulum; C:membrane
TRUE	INTERPRO	g16696.t1		199									no IPS match	no IPS match	no IPS match
TRUE	INTERPRO	g31416.t1		197									IPR002100 (PFAM); IPR002487 (PFAM); IPR021279 (PFAM); IPR009579 (PFAM)	P:GO:0006355; F:GO:0003677; F:GO:0003700; F:GO:0046983; C:GO:0005634	P:regulation of DNA-templated transcription; F:DNA binding; F:DNA-binding transcription factor activity; F:protein dimerization activity; C:nucleus
TRUE	INTERPRO	g43750.t1		165									no IPS match	no IPS match	no IPS match
TRUE	INTERPRO	g2718.t1		191									IPR001650 (PFAM); IPR002305 (PFAM)	P:GO:0006418; F:GO:0000166; F:GO:0004812; F:GO:0005524	P:tRNA aminoacylation for protein translation; F:nucleotide binding; F:aminoacyl-tRNA ligase activity; F:ATP binding
TRUE	INTERPRO	g2131.t1		524									IPR020058 (PFAM); IPR000008 (PFAM); IPR007747 (PFAM)	P:GO:0043039; F:GO:0004812; F:GO:0005515; F:GO:0005524; C:GO:0005634	P:tRNA aminoacylation; F:aminoacyl-tRNA ligase activity; F:protein binding; F:ATP binding; C:nucleus
TRUE	INTERPRO	g14807.t1		990									IPR031517 (PFAM); IPR022091 (PFAM); IPR026805 (PFAM)	no GO terms	no GO terms
TRUE	INTERPRO	g33620.t1		308									IPR008030 (PFAM)	no GO terms	no GO terms
TRUE	INTERPRO	g2246.t1		773									IPR003594 (PFAM); IPR001789 (PFAM); IPR003018 (PFAM); IPR003661 (PFAM)	P:GO:0000160; P:GO:0007165; F:GO:0000155; F:GO:0005515	P:phosphorelay signal transduction system; P:signal transduction; F:phosphorelay sensor kinase activity; F:protein binding
TRUE	INTERPRO	g5526.t2		523									IPR031987 (PFAM); IPR006785 (PFAM)	no GO terms	no GO terms
TRUE	INTERPRO	g39017.t1		152									IPR003034 (PFAM); PF13517 (PFAM); IPR002048 (PFAM)	F:GO:0005509	F:calcium ion binding
TRUE	INTERPRO	g38754.t1		447									IPR002022 (PFAM); IPR007524 (PFAM)	F:GO:0030570	F:pectate lyase activity
TRUE	INTERPRO	g44727.t1		350									no IPS match	no IPS match	no IPS match
TRUE	INTERPRO	g20368.t1		371									IPR003690 (PFAM)	P:GO:0006355; F:GO:0003690	P:regulation of DNA-templated transcription; F:double-stranded DNA binding
TRUE	INTERPRO	g3900.t1		103									no IPS match	no IPS match	no IPS match
TRUE	INTERPRO	g13885.t2		543									IPR002867 (PFAM); IPR015239 (PFAM); IPR003101 (PFAM); IPR010582 (PFAM); IPR013627 (PFAM); IPR003101 (PFAM); IPR018957 (PFAM)	P:GO:0006355; F:GO:0003712; F:GO:0046872	P:regulation of DNA-templated transcription; F:transcription coregulator activity; F:metal ion binding
TRUE	INTERPRO	g16031.t1		770									IPR007021 (PFAM); IPR003656 (PFAM); IPR025525 (PFAM); IPR008906 (PFAM)	F:GO:0003677; F:GO:0046983	F:DNA binding; F:protein dimerization activity
TRUE	INTERPRO	g20083.t1		1215									IPR001194 (PFAM); IPR005112 (PFAM); IPR022096 (PFAM); IPR005113 (PFAM); PF11715 (PFAM); IPR001680 (PFAM); IPR031544 (PFAM)	F:GO:0005515	F:protein binding
TRUE	INTERPRO	g15053.t1		175									IPR005804 (PFAM)	P:GO:0006629	P:lipid metabolic process
TRUE	INTERPRO	g7543.t1		297									IPR003656 (PFAM)	F:GO:0003677	F:DNA binding
TRUE	INTERPRO	g16208.t1		237									IPR003656 (PFAM)	F:GO:0003677	F:DNA binding
TRUE	INTERPRO	g14049.t1		593									IPR007173 (PFAM); IPR004240 (PFAM)	P:GO:0055114; F:GO:0003885; C:GO:0016020; C:GO:0016020	P:obsolete oxidation-reduction process; F:D-arabinono-1,4-lactone oxidase activity; C:membrane; C:membrane
TRUE	INTERPRO	g44596.t1		114									IPR020139 (PFAM); IPR001163 (PFAM); IPR003142 (PFAM); IPR020338 (PFAM)	P:GO:0036211; C:GO:0034719	P:protein modification process; C:SMN-Sm protein complex
TRUE	INTERPRO	g21627.t1		194									IPR008906 (PFAM)	F:GO:0046983	F:protein dimerization activity
TRUE	INTERPRO	g6956.t1		1029									IPR000061 (PFAM); IPR019147 (PFAM)	P:GO:0006396; F:GO:0003723	P:RNA processing; F:RNA binding
TRUE	INTERPRO	g25888.t1		485									IPR022030 (PFAM); PF14605 (PFAM); IPR000504 (PFAM)	F:GO:0003676	F:nucleic acid binding
TRUE	INTERPRO	g8360.t1		224									IPR001320 (PFAM); IPR025962 (PFAM); IPR019594 (PFAM)	F:GO:0004970; F:GO:0005234; C:GO:0016020	F:glutamate-gated receptor activity; F:extracellularly glutamate-gated ion channel activity; C:membrane
TRUE	INTERPRO	g39921.t1		995									IPR013103 (PFAM); IPR002156 (PFAM); IPR001584 (PFAM)	P:GO:0015074; F:GO:0003676; F:GO:0004523	P:DNA integration; F:nucleic acid binding; F:RNA-DNA hybrid ribonuclease activity
TRUE	INTERPRO	g28747.t1		135									IPR007759 (PFAM)	P:GO:0006351; P:GO:0006355	P:DNA-templated transcription; P:regulation of DNA-templated transcription
TRUE	INTERPRO	g25194.t1		110									IPR009155 (PFAM); IPR031908 (PFAM); IPR024596 (PFAM)	P:GO:0022900; F:GO:0005506; F:GO:0009055; F:GO:0020037; C:GO:0042597	P:electron transport chain; F:iron ion binding; F:electron transfer activity; F:heme binding; C:periplasmic space
TRUE	INTERPRO	g3509.t1		746									PF14223 (PFAM); IPR013103 (PFAM)	no GO terms	no GO terms
TRUE	INTERPRO	g30014.t1		180									IPR029303 (PFAM); IPR004316 (PFAM); IPR002781 (PFAM)	C:GO:0016020	C:membrane
TRUE	INTERPRO	g25791.t1		264									IPR020966 (PFAM)	P:GO:0015743	P:malate transport
TRUE	INTERPRO	g20691.t1		511									IPR001128 (PFAM); IPR031546 (PFAM)	P:GO:0055114; F:GO:0005506; F:GO:0016705; F:GO:0020037	P:obsolete oxidation-reduction process; F:iron ion binding; F:oxidoreductase activity, acting on paired donors, with incorporation or reduction of molecular oxygen; F:heme binding
TRUE	INTERPRO	g26767.t1		554									IPR000477 (PFAM)	no GO terms	no GO terms
TRUE	INTERPRO	g20888.t1		374									IPR003010 (PFAM)	P:GO:0006807; F:GO:0016810	P:obsolete nitrogen compound metabolic process; F:hydrolase activity, acting on carbon-nitrogen (but not peptide) bonds
TRUE	INTERPRO	g41280.t1		333									IPR033451 (PFAM); IPR031590 (PFAM); IPR002782 (PFAM)	no GO terms	no GO terms
TRUE	INTERPRO	g28798.t1		354									IPR024977 (PFAM); IPR001680 (PFAM); IPR031544 (PFAM)	F:GO:0005515	F:protein binding
TRUE	INTERPRO	g5610.t1		607									IPR014876 (PFAM)	no GO terms	no GO terms
TRUE	INTERPRO	g32198.t1		260									IPR001077 (PFAM)	F:GO:0008171	F:O-methyltransferase activity
TRUE	INTERPRO	g27295.t1		238									IPR001087 (PFAM)	F:GO:0016788	F:hydrolase activity, acting on ester bonds
TRUE	INTERPRO	g33947.t1		293									IPR000582 (PFAM)	F:GO:0000062	F:fatty-acyl-CoA binding
TRUE	INTERPRO	g36142.t1		827									IPR001245 (PFAM); IPR001480 (PFAM); IPR000858 (PFAM); IPR009512 (PFAM); IPR021820 (PFAM); IPR003609 (PFAM)	P:GO:0006468; P:GO:0048544; F:GO:0004672; F:GO:0004674	P:protein phosphorylation; P:recognition of pollen; F:protein kinase activity; F:protein serine/threonine kinase activity
TRUE	INTERPRO	g3253.t1		778									IPR003656 (PFAM); IPR008906 (PFAM); IPR007021 (PFAM); IPR025525 (PFAM)	F:GO:0003677; F:GO:0046983	F:DNA binding; F:protein dimerization activity
TRUE	INTERPRO	g36870.t1		135									no IPS match	no IPS match	no IPS match
TRUE	INTERPRO	g32913.t1		338									PF14223 (PFAM); IPR001878 (PFAM)	F:GO:0003676; F:GO:0008270	F:nucleic acid binding; F:zinc ion binding
TRUE	INTERPRO	g29418.t1		448									IPR002735 (PFAM); IPR003307 (PFAM)	P:GO:0006413; F:GO:0003743; F:GO:0005515	P:translational initiation; F:translation initiation factor activity; F:protein binding
TRUE	INTERPRO	g13637.t1		216									IPR001806 (PFAM)	P:GO:0007264; F:GO:0005525	P:small GTPase-mediated signal transduction; F:GTP binding
TRUE	INTERPRO	g40827.t1		353									no IPS match	no IPS match	no IPS match
TRUE	INTERPRO	g15070.t1		436									no IPS match	no IPS match	no IPS match
TRUE	INTERPRO	g16143.t1		368									IPR001932 (PFAM)	F:GO:0003824	F:catalytic activity
TRUE	INTERPRO	g32988.t1		98									no IPS match	no IPS match	no IPS match
TRUE	INTERPRO	g3473.t1		108									no IPS match	no IPS match	no IPS match
TRUE	INTERPRO	g37751.t2		850									IPR013126 (PFAM)	no GO terms	no GO terms
TRUE	INTERPRO	g22728.t1		1167									IPR013103 (PFAM); IPR001584 (PFAM); IPR025724 (PFAM)	P:GO:0015074	P:DNA integration
TRUE	INTERPRO	g38453.t1		432									IPR008147 (PFAM); IPR008146 (PFAM)	P:GO:0006542; P:GO:0006807; F:GO:0004356	P:glutamine biosynthetic process; P:obsolete nitrogen compound metabolic process; F:glutamine synthetase activity
TRUE	INTERPRO	g16404.t1		108									no IPS match	no IPS match	no IPS match
TRUE	INTERPRO	g18199.t1		353									IPR022093 (PFAM)	no GO terms	no GO terms
TRUE	INTERPRO	g42697.t1		168									IPR008796 (PFAM); IPR009806 (PFAM); IPR008797 (PFAM)	P:GO:0015979; F:GO:0005509; C:GO:0009507; C:GO:0009522; C:GO:0009523; C:GO:0009654; C:GO:0019898	P:photosynthesis; F:calcium ion binding; C:chloroplast; C:photosystem I; C:photosystem II; C:photosystem II oxygen evolving complex; C:extrinsic component of membrane
TRUE	INTERPRO	g32377.t1		432									IPR025314 (PFAM); IPR016090 (PFAM); IPR019513 (PFAM); IPR013682 (PFAM); PF14223 (PFAM); IPR009252 (PFAM)	P:GO:0006644; P:GO:0043093; P:GO:0050482; P:GO:0090529; F:GO:0004623; F:GO:0008134; F:GO:0042803; F:GO:0070840; C:GO:0005737	P:phospholipid metabolic process; P:FtsZ-dependent cytokinesis; P:arachidonate secretion; P:cell septum assembly; F:phospholipase A2 activity; F:transcription factor binding; F:protein homodimerization activity; F:dynein complex binding; C:cytoplasm
TRUE	INTERPRO	g22142.t1		432									IPR025314 (PFAM); IPR016090 (PFAM); IPR019513 (PFAM); IPR013682 (PFAM); PF14223 (PFAM); IPR009252 (PFAM)	P:GO:0006644; P:GO:0043093; P:GO:0050482; P:GO:0090529; F:GO:0004623; F:GO:0008134; F:GO:0042803; F:GO:0070840; C:GO:0005737	P:phospholipid metabolic process; P:FtsZ-dependent cytokinesis; P:arachidonate secretion; P:cell septum assembly; F:phospholipase A2 activity; F:transcription factor binding; F:protein homodimerization activity; F:dynein complex binding; C:cytoplasm
TRUE	INTERPRO	g29212.t1		177									IPR001623 (PFAM)	no GO terms	no GO terms
TRUE	INTERPRO	g45200.t2		286									IPR000704 (PFAM)	F:GO:0019887; C:GO:0005956	F:protein kinase regulator activity; C:protein kinase CK2 complex
TRUE	INTERPRO	g11363.t1		262									IPR006694 (PFAM); IPR006977 (PFAM)	P:GO:0006633; P:GO:0055114; F:GO:0005506; F:GO:0016491; C:GO:0016020	P:fatty acid biosynthetic process; P:obsolete oxidation-reduction process; F:iron ion binding; F:oxidoreductase activity; C:membrane
TRUE	INTERPRO	g15757.t1		174									IPR008906 (PFAM)	F:GO:0046983	F:protein dimerization activity
TRUE	INTERPRO	g27268.t1		172									IPR029385 (PFAM); IPR019179 (PFAM); IPR003106 (PFAM); IPR031775 (PFAM); IPR001356 (PFAM); IPR009252 (PFAM); PF15035 (PFAM)	P:GO:0006355; P:GO:0043093; P:GO:0090529; F:GO:0003677; F:GO:0003700; F:GO:0019901; F:GO:0043565; C:GO:0005737	P:regulation of DNA-templated transcription; P:FtsZ-dependent cytokinesis; P:cell septum assembly; F:DNA binding; F:DNA-binding transcription factor activity; F:protein kinase binding; F:sequence-specific DNA binding; C:cytoplasm
TRUE	INTERPRO	g14310.t1		188									IPR006840 (PFAM); IPR025666 (PFAM)	P:GO:0006751; F:GO:0003839	P:glutathione catabolic process; F:gamma-glutamylcyclotransferase activity
TRUE	INTERPRO	g23823.t1		108									no IPS match	no IPS match	no IPS match
TRUE	INTERPRO	g45269.t1		346									IPR003848 (PFAM)	no GO terms	no GO terms
TRUE	INTERPRO	g16530.t1		211									IPR006501 (PFAM)	F:GO:0004857	F:enzyme inhibitor activity
TRUE	INTERPRO	g32922.t1		572									PF14223 (PFAM); IPR001878 (PFAM); IPR010377 (PFAM); IPR025314 (PFAM)	P:GO:0006260; F:GO:0003676; F:GO:0008270	P:DNA replication; F:nucleic acid binding; F:zinc ion binding
TRUE	INTERPRO	g22774.t1		440									IPR000834 (PFAM)	P:GO:0006508; F:GO:0004181; F:GO:0008270	P:proteolysis; F:metallocarboxypeptidase activity; F:zinc ion binding
TRUE	INTERPRO	g18546.t1		258									PF13771 (PFAM); IPR007285 (PFAM); IPR024610 (PFAM); IPR009851 (PFAM); IPR019787 (PFAM)	F:GO:0005515	F:protein binding
TRUE	INTERPRO	g15638.t1		316									IPR018753 (PFAM); IPR018502 (PFAM); IPR012441 (PFAM)	F:GO:0005509; F:GO:0005544	F:calcium ion binding; F:calcium-dependent phospholipid binding
TRUE	INTERPRO	g16993.t1		95									IPR001305 (PFAM)	F:GO:0031072; F:GO:0051082	F:heat shock protein binding; F:unfolded protein binding
TRUE	INTERPRO	g21902.t1		245									IPR019530 (PFAM); IPR022150 (PFAM)	no GO terms	no GO terms
TRUE	INTERPRO	g37298.t1		1071									IPR007191 (PFAM); IPR019515 (PFAM); IPR009361 (PFAM)	P:GO:0000278; P:GO:0006904; P:GO:0015031; C:GO:0000145; C:GO:0000775; C:GO:0005634	P:mitotic cell cycle; P:vesicle docking involved in exocytosis; P:protein transport; C:exocyst; C:chromosome, centromeric region; C:nucleus
TRUE	INTERPRO	g35129.t1		224									IPR002939 (PFAM)	no GO terms	no GO terms
TRUE	INTERPRO	g8893.t1		386									IPR013878 (PFAM)	no GO terms	no GO terms
TRUE	INTERPRO	g35002.t2		668									IPR002495 (PFAM)	F:GO:0016757	F:glycosyltransferase activity
TRUE	INTERPRO	g6892.t1		169									IPR004864 (PFAM)	no GO terms	no GO terms
TRUE	INTERPRO	g17583.t1		248									no IPS match	no IPS match	no IPS match
TRUE	INTERPRO	g23997.t1		338									PF14223 (PFAM); IPR001878 (PFAM)	F:GO:0003676; F:GO:0008270	F:nucleic acid binding; F:zinc ion binding
TRUE	INTERPRO	g6148.t1		155									IPR002490 (PFAM); IPR021793 (PFAM); IPR001029 (PFAM); IPR022587 (PFAM); IPR008398 (PFAM); IPR012458 (PFAM); IPR007243 (PFAM); IPR019513 (PFAM); IPR026866 (PFAM)	P:GO:0006914; P:GO:0071973; P:GO:1902600; F:GO:0005198; F:GO:0008134; F:GO:0015078; F:GO:0042803; F:GO:0070840; C:GO:0033179	P:autophagy; P:bacterial-type flagellum-dependent cell motility; P:proton transmembrane transport; F:structural molecule activity; F:transcription factor binding; F:proton transmembrane transporter activity; F:protein homodimerization activity; F:dynein complex binding; C:proton-transporting V-type ATPase, V0 domain
TRUE	INTERPRO	g43677.t1		395									IPR001932 (PFAM)	F:GO:0003824	F:catalytic activity
TRUE	INTERPRO	g30004.t1		224									no IPS match	no IPS match	no IPS match
TRUE	INTERPRO	g12324.t1		1165									IPR001584 (PFAM); IPR013103 (PFAM); IPR025724 (PFAM)	P:GO:0015074	P:DNA integration
TRUE	INTERPRO	g43955.t1		109									no IPS match	no IPS match	no IPS match
TRUE	INTERPRO	g31036.t1		343									IPR011685 (PFAM); IPR001005 (PFAM)	no GO terms	no GO terms
TRUE	INTERPRO	g15669.t1		338									IPR001878 (PFAM); PF14223 (PFAM)	F:GO:0003676; F:GO:0008270	F:nucleic acid binding; F:zinc ion binding
TRUE	INTERPRO	g14561.t1		99									IPR008906 (PFAM)	F:GO:0046983	F:protein dimerization activity
TRUE	INTERPRO	g34719.t1		295									IPR009457 (PFAM)	no GO terms	no GO terms
TRUE	INTERPRO	g32945.t1		257									IPR031946 (PFAM); IPR019787 (PFAM); IPR013137 (PFAM); IPR021998 (PFAM); IPR001841 (PFAM); IPR004146 (PFAM)	P:GO:0006355; F:GO:0005515; F:GO:0008270; F:GO:0042393	P:regulation of DNA-templated transcription; F:protein binding; F:zinc ion binding; F:histone binding
TRUE	INTERPRO	g20803.t1		122									IPR006808 (PFAM)	P:GO:0015986; F:GO:0015078; C:GO:0000276	P:proton motive force-driven ATP synthesis; F:proton transmembrane transporter activity; C:obsolete mitochondrial proton-transporting ATP synthase complex, coupling factor F(o)
TRUE	INTERPRO	g21673.t1		597									IPR024550 (PFAM); IPR025314 (PFAM); PF08700 (PFAM); IPR022043 (PFAM); PF14223 (PFAM); IPR001878 (PFAM); IPR019294 (PFAM)	F:GO:0003676; F:GO:0008270	F:nucleic acid binding; F:zinc ion binding
TRUE	INTERPRO	g12241.t1		200									no IPS match	no IPS match	no IPS match
TRUE	INTERPRO	g32465.t1		282									IPR010889 (PFAM)	no GO terms	no GO terms
TRUE	INTERPRO	g45604.t1		701									IPR013809 (PFAM); IPR000357 (PFAM); IPR024574 (PFAM); IPR012583 (PFAM); IPR024395 (PFAM)	F:GO:0005515	F:protein binding
TRUE	INTERPRO	g37024.t1		84									no IPS match	no IPS match	no IPS match
TRUE	INTERPRO	g29108.t1		752									IPR005343 (PFAM)	no GO terms	no GO terms
TRUE	INTERPRO	g19803.t1		523									IPR025314 (PFAM); IPR001878 (PFAM); IPR022043 (PFAM); PF14223 (PFAM)	F:GO:0003676; F:GO:0008270	F:nucleic acid binding; F:zinc ion binding
TRUE	INTERPRO	g4464.t1		272									IPR002885 (PFAM); IPR002885 (PFAM); IPR002885 (PFAM)	no GO terms	no GO terms
TRUE	INTERPRO	g16700.t1		337									IPR016053 (PFAM)	P:GO:0006788; P:GO:0055114; F:GO:0004392	P:heme oxidation; P:obsolete oxidation-reduction process; F:heme oxygenase (decyclizing) activity
TRUE	INTERPRO	g14767.t1		747									IPR001841 (PFAM); IPR031488 (PFAM); PF13832 (PFAM)	F:GO:0005515; F:GO:0008270	F:protein binding; F:zinc ion binding
TRUE	INTERPRO	g24650.t1		201									IPR028265 (PFAM)	no GO terms	no GO terms
TRUE	INTERPRO	g14896.t1		234									IPR031925 (PFAM); IPR002154 (PFAM); IPR021413 (PFAM); PF13561 (PFAM)	F:GO:0015631	F:tubulin binding
TRUE	INTERPRO	g17130.t1		448									IPR000719 (PFAM)	P:GO:0006468; F:GO:0004672; F:GO:0005524	P:protein phosphorylation; F:protein kinase activity; F:ATP binding
TRUE	INTERPRO	g30946.t1		522									IPR018484 (PFAM); IPR018485 (PFAM)	P:GO:0005975; F:GO:0016773	P:carbohydrate metabolic process; F:phosphotransferase activity, alcohol group as acceptor
TRUE	INTERPRO	g15256.t1		186									no IPS match	no IPS match	no IPS match
TRUE	INTERPRO	g38405.t1		199									IPR013085 (PFAM)	F:GO:0008270	F:zinc ion binding
TRUE	INTERPRO	g30755.t1		152									IPR019185 (PFAM)	no GO terms	no GO terms
TRUE	INTERPRO	g27821.t1		103									IPR008700 (PFAM)	no GO terms	no GO terms
TRUE	INTERPRO	g29063.t1		148									IPR013258 (PFAM); IPR022091 (PFAM); IPR010666 (PFAM)	F:GO:0008270	F:zinc ion binding
TRUE	INTERPRO	g25097.t1		1206									IPR022672 (PFAM); IPR007502 (PFAM); IPR003439 (PFAM); IPR001374 (PFAM); IPR011545 (PFAM); IPR020683 (PFAM); IPR011709 (PFAM); IPR003593 (PFAM); IPR001650 (PFAM)	P:GO:0005975; F:GO:0003676; F:GO:0004386; F:GO:0005524; F:GO:0016773; F:GO:0016887	P:carbohydrate metabolic process; F:nucleic acid binding; F:helicase activity; F:ATP binding; F:phosphotransferase activity, alcohol group as acceptor; F:ATP hydrolysis activity
TRUE	INTERPRO	g23065.t1		106									no IPS match	no IPS match	no IPS match
TRUE	INTERPRO	g23067.t1		106									no IPS match	no IPS match	no IPS match
TRUE	INTERPRO	g42601.t1		935									IPR002483 (PFAM); IPR000504 (PFAM)	P:GO:0006397; F:GO:0003676	P:mRNA processing; F:nucleic acid binding
TRUE	INTERPRO	g22066.t1		74									IPR002777 (PFAM)	P:GO:0006457; F:GO:0051082; C:GO:0016272	P:protein folding; F:unfolded protein binding; C:prefoldin complex
TRUE	INTERPRO	g33347.t1		339									IPR001878 (PFAM); PF14223 (PFAM)	F:GO:0003676; F:GO:0008270	F:nucleic acid binding; F:zinc ion binding
TRUE	INTERPRO	g36446.t1		353									no IPS match	no IPS match	no IPS match
TRUE	INTERPRO	g12344.t1		138									PF14223 (PFAM)	no GO terms	no GO terms
TRUE	INTERPRO	g10444.t1		283									IPR001878 (PFAM); PF14223 (PFAM)	F:GO:0003676; F:GO:0008270	F:nucleic acid binding; F:zinc ion binding
TRUE	INTERPRO	g11925.t1		543									IPR013103 (PFAM); IPR002156 (PFAM)	F:GO:0003676; F:GO:0004523	F:nucleic acid binding; F:RNA-DNA hybrid ribonuclease activity
TRUE	INTERPRO	g40204.t1		103									IPR010340 (PFAM)	F:GO:0005198	F:structural molecule activity
TRUE	INTERPRO	g4408.t1		484									IPR005824 (PFAM); IPR026822 (PFAM)	no GO terms	no GO terms
TRUE	INTERPRO	g1478.t1		185									IPR002472 (PFAM)	F:GO:0098599	F:palmitoyl hydrolase activity
TRUE	INTERPRO	g4058.t1		599									IPR006869 (PFAM); IPR025757 (PFAM); PF16662 (PFAM)	no GO terms	no GO terms
TRUE	INTERPRO	g10793.t1		739									IPR022744 (PFAM); IPR022022 (PFAM); IPR010304 (PFAM); IPR029101 (PFAM); IPR015425 (PFAM); IPR022488 (PFAM)	P:GO:0006397; F:GO:0003723; C:GO:0005634; C:GO:0005737	P:mRNA processing; F:RNA binding; C:nucleus; C:cytoplasm
TRUE	INTERPRO	g28328.t1		606									IPR002293 (PFAM); IPR029485 (PFAM); IPR007792 (PFAM)	P:GO:0003333; F:GO:0015171; C:GO:0016020	P:amino acid transmembrane transport; F:amino acid transmembrane transporter activity; C:membrane
TRUE	INTERPRO	g29357.t1		341									IPR002925 (PFAM); IPR013094 (PFAM)	P:GO:0008152; F:GO:0016787	P:metabolic process; F:hydrolase activity
TRUE	INTERPRO	g44261.t1		472									IPR020975 (PFAM); IPR002213 (PFAM)	P:GO:0008152; F:GO:0016758	P:metabolic process; F:hexosyltransferase activity
TRUE	INTERPRO	g29505.t1		253									IPR022667 (PFAM); IPR000726 (PFAM)	P:GO:0006032; P:GO:0006730; P:GO:0016998; F:GO:0004568; F:GO:0016740	P:chitin catabolic process; P:one-carbon metabolic process; P:cell wall macromolecule catabolic process; F:chitinase activity; F:transferase activity
TRUE	INTERPRO	g29705.t1		377									IPR026960 (PFAM)	no GO terms	no GO terms
TRUE	INTERPRO	g23964.t1		146									IPR024405 (PFAM); IPR004127 (PFAM); IPR015404 (PFAM)	no GO terms	no GO terms
TRUE	INTERPRO	g28731.t1		154									IPR001623 (PFAM)	no GO terms	no GO terms
TRUE	INTERPRO	g27657.t1		372									IPR006891 (PFAM); IPR007631 (PFAM)	P:GO:0006352; P:GO:0006355; F:GO:0003677; F:GO:0003700; F:GO:0016987	P:DNA-templated transcription initiation; P:regulation of DNA-templated transcription; F:DNA binding; F:DNA-binding transcription factor activity; F:sigma factor activity
TRUE	INTERPRO	g15019.t1		110									no IPS match	no IPS match	no IPS match
TRUE	INTERPRO	g25946.t1		254									IPR006121 (PFAM)	P:GO:0030001; F:GO:0046872	P:metal ion transport; F:metal ion binding
TRUE	INTERPRO	g36081.t1		712									IPR000719 (PFAM)	P:GO:0006468; F:GO:0004672; F:GO:0005524	P:protein phosphorylation; F:protein kinase activity; F:ATP binding
TRUE	INTERPRO	g22178.t1		569									IPR025314 (PFAM); PF14223 (PFAM)	no GO terms	no GO terms
TRUE	INTERPRO	g13191.t1		145									IPR013134 (PFAM); IPR001841 (PFAM); IPR019787 (PFAM); IPR026850 (PFAM)	F:GO:0005515; F:GO:0008270	F:protein binding; F:zinc ion binding
TRUE	INTERPRO	g28744.t2		267									IPR001623 (PFAM); IPR021788 (PFAM)	no GO terms	no GO terms
TRUE	INTERPRO	g16475.t1		534									IPR002885 (PFAM); IPR033443 (PFAM); IPR002885 (PFAM)	no GO terms	no GO terms
TRUE	INTERPRO	g19545.t1		442									IPR003137 (PFAM); IPR001841 (PFAM)	F:GO:0005515; F:GO:0008270	F:protein binding; F:zinc ion binding
TRUE	INTERPRO	g19546.t1		442									IPR003137 (PFAM); IPR001841 (PFAM)	F:GO:0005515; F:GO:0008270	F:protein binding; F:zinc ion binding
TRUE	INTERPRO	g29130.t1		152									IPR006702 (PFAM)	no GO terms	no GO terms
TRUE	INTERPRO	g20142.t1		425									PF14223 (PFAM); IPR031994 (PFAM); IPR029440 (PFAM); IPR003106 (PFAM); IPR012943 (PFAM); IPR025314 (PFAM); IPR020959 (PFAM); IPR001878 (PFAM)	P:GO:0006355; P:GO:0044038; F:GO:0003676; F:GO:0003700; F:GO:0008270; F:GO:0016757; F:GO:0043565; C:GO:0005815; C:GO:0005886; C:GO:0016020	P:regulation of DNA-templated transcription; P:cell wall macromolecule biosynthetic process; F:nucleic acid binding; F:DNA-binding transcription factor activity; F:zinc ion binding; F:glycosyltransferase activity; F:sequence-specific DNA binding; C:microtubule organizing center; C:plasma membrane; C:membrane
TRUE	INTERPRO	g31634.t1		108									no IPS match	no IPS match	no IPS match
TRUE	INTERPRO	g33453.t1		215									IPR004152 (PFAM); IPR013766 (PFAM); IPR013154 (PFAM)	P:GO:0006886; P:GO:0045454; P:GO:0055114; C:GO:0005622	P:intracellular protein transport; P:cell redox homeostasis; P:obsolete oxidation-reduction process; C:intracellular anatomical structure
TRUE	INTERPRO	g3859.t1		105									PF13920 (PFAM); IPR025874 (PFAM); IPR028274 (PFAM); IPR008598 (PFAM)	no GO terms	no GO terms
TRUE	INTERPRO	g12494.t2		776									IPR003890 (PFAM); IPR003891 (PFAM)	F:GO:0003723; F:GO:0005515	F:RNA binding; F:protein binding
TRUE	INTERPRO	g22435.t1		371									IPR013822 (PFAM); IPR006050 (PFAM); IPR003593 (PFAM); IPR000897 (PFAM)	P:GO:0006614; F:GO:0005525	P:SRP-dependent cotranslational protein targeting to membrane; F:GTP binding
TRUE	INTERPRO	g43732.t1		187									IPR004345 (PFAM)	no GO terms	no GO terms
TRUE	INTERPRO	g11933.t1		376									PF14447 (PFAM); PF13832 (PFAM); IPR021948 (PFAM); IPR001841 (PFAM)	F:GO:0005515; F:GO:0008270	F:protein binding; F:zinc ion binding
TRUE	INTERPRO	g18749.t1		247									IPR014830 (PFAM); IPR004045 (PFAM)	P:GO:0046836; F:GO:0005515; F:GO:0017089; F:GO:0051861; C:GO:0005737	P:glycolipid transport; F:protein binding; F:glycolipid transfer activity; F:glycolipid binding; C:cytoplasm
TRUE	INTERPRO	g13883.t1		186									no IPS match	no IPS match	no IPS match
TRUE	INTERPRO	g4040.t1		303									IPR000477 (PFAM)	no GO terms	no GO terms
TRUE	INTERPRO	g39337.t1		132									IPR008011 (PFAM)	no GO terms	no GO terms
TRUE	INTERPRO	g17568.t1		216									IPR004883 (PFAM)	no GO terms	no GO terms
TRUE	INTERPRO	g6742.t1		419									IPR027329 (PFAM)	no GO terms	no GO terms
TRUE	INTERPRO	g36521.t1		429									IPR007754 (PFAM)	P:GO:0009312; F:GO:0008455; C:GO:0005795; C:GO:0016020	P:oligosaccharide biosynthetic process; F:alpha-1,6-mannosylglycoprotein 2-beta-N-acetylglucosaminyltransferase activity; C:Golgi stack; C:membrane
TRUE	INTERPRO	g43425.t1		338									IPR001878 (PFAM); IPR007671 (PFAM); PF14223 (PFAM)	F:GO:0003676; F:GO:0008270	F:nucleic acid binding; F:zinc ion binding
TRUE	INTERPRO	g5056.t1		162									IPR020784 (PFAM); IPR020783 (PFAM)	P:GO:0006412; F:GO:0003735; C:GO:0005840	P:translation; F:structural constituent of ribosome; C:ribosome
TRUE	INTERPRO	g15516.t1		58									no IPS match	no IPS match	no IPS match
TRUE	INTERPRO	g44711.t1		243									IPR009701 (PFAM); IPR022228 (PFAM); IPR001005 (PFAM); IPR029342 (PFAM)	no GO terms	no GO terms
TRUE	INTERPRO	g37281.t1		113									no IPS match	no IPS match	no IPS match
TRUE	INTERPRO	g40229.t1		276									no IPS match	no IPS match	no IPS match
TRUE	INTERPRO	g24199.t1		1688									IPR021929 (PFAM); IPR008615 (PFAM); IPR003959 (PFAM); PF05729 (PFAM); IPR014774 (PFAM); IPR002182 (PFAM)	F:GO:0005524; F:GO:0043531	F:ATP binding; F:ADP binding
TRUE	INTERPRO	g5721.t1		634									IPR005380 (PFAM); IPR005381 (PFAM)	P:GO:0031047	P:regulatory ncRNA-mediated gene silencing
TRUE	INTERPRO	g35030.t1		971									IPR032632 (PFAM); IPR011765 (PFAM); IPR007863 (PFAM)	no GO terms	no GO terms
TRUE	INTERPRO	g26299.t1		351									no IPS match	no IPS match	no IPS match
TRUE	INTERPRO	g28656.t1		353									no IPS match	no IPS match	no IPS match
TRUE	INTERPRO	g33885.t1		528									IPR013698 (PFAM); PF01946 (PFAM); IPR025594 (PFAM); PF13450 (PFAM); PF13738 (PFAM)	P:GO:0055114; F:GO:0004506; F:GO:0050660; C:GO:0016020	P:obsolete oxidation-reduction process; F:squalene monooxygenase activity; F:flavin adenine dinucleotide binding; C:membrane
TRUE	INTERPRO	g18475.t1		803									IPR027329 (PFAM)	no GO terms	no GO terms
TRUE	INTERPRO	g13014.t2		439									IPR028565 (PFAM); IPR022775 (PFAM)	no GO terms	no GO terms
TRUE	INTERPRO	g24983.t1		1170									IPR001584 (PFAM); IPR013103 (PFAM); IPR025724 (PFAM)	P:GO:0015074	P:DNA integration
TRUE	INTERPRO	g15979.t1		134									IPR017956 (PFAM)	F:GO:0003677	F:DNA binding
TRUE	INTERPRO	g13502.t2		132									no IPS match	no IPS match	no IPS match
TRUE	INTERPRO	g7752.t1		1097									IPR007066 (PFAM); IPR007083 (PFAM); IPR000722 (PFAM); IPR007081 (PFAM)	P:GO:0006351; F:GO:0003677; F:GO:0003899	P:DNA-templated transcription; F:DNA binding; F:DNA-directed 5'-3' RNA polymerase activity
TRUE	INTERPRO	g34581.t1		223									IPR012946 (PFAM)	no GO terms	no GO terms
TRUE	INTERPRO	g41448.t1		104									no IPS match	no IPS match	no IPS match
TRUE	INTERPRO	g2897.t1		238									IPR018467 (PFAM); IPR010399 (PFAM); IPR010402 (PFAM)	F:GO:0005515	F:protein binding
TRUE	INTERPRO	g4290.t1		353									no IPS match	no IPS match	no IPS match
TRUE	INTERPRO	g36127.t1		356									IPR003834 (PFAM)	P:GO:0017004; P:GO:0055114; C:GO:0016020	P:cytochrome complex assembly; P:obsolete oxidation-reduction process; C:membrane
TRUE	INTERPRO	g7469.t1		197									IPR003465 (PFAM)	F:GO:0004867	F:serine-type endopeptidase inhibitor activity
TRUE	INTERPRO	g39309.t1		363									IPR033248 (PFAM); IPR005475 (PFAM)	no GO terms	no GO terms
TRUE	INTERPRO	g44652.t1		453									IPR002638 (PFAM); IPR002075 (PFAM); IPR000504 (PFAM)	P:GO:0006810; P:GO:0009435; F:GO:0003676; F:GO:0004514; C:GO:0005622	P:transport; P:NAD biosynthetic process; F:nucleic acid binding; F:nicotinate-nucleotide diphosphorylase (carboxylating) activity; C:intracellular anatomical structure
TRUE	INTERPRO	g41316.t1		481									IPR032799 (PFAM); IPR032861 (PFAM)	no GO terms	no GO terms
TRUE	INTERPRO	g14533.t1		711									IPR025525 (PFAM); IPR008906 (PFAM); IPR003656 (PFAM); IPR007021 (PFAM)	F:GO:0003677; F:GO:0046983	F:DNA binding; F:protein dimerization activity
TRUE	INTERPRO	g10755.t1		258									IPR003838 (PFAM); IPR018702 (PFAM); IPR011016 (PFAM)	F:GO:0008270; C:GO:0016020	F:zinc ion binding; C:membrane
TRUE	INTERPRO	g6181.t1		435									IPR024319 (PFAM); IPR011990 (PFAM); IPR002885 (PFAM); IPR002885 (PFAM); IPR002885 (PFAM); PF14689 (PFAM)	F:GO:0005515	F:protein binding
TRUE	INTERPRO	g5239.t1		428									IPR001245 (PFAM)	P:GO:0006468; F:GO:0004672	P:protein phosphorylation; F:protein kinase activity
TRUE	INTERPRO	g31286.t2		264									IPR001251 (PFAM); IPR011074 (PFAM)	no GO terms	no GO terms
TRUE	INTERPRO	g4908.t2		490									IPR023753 (PFAM)	P:GO:0055114; F:GO:0016491	P:obsolete oxidation-reduction process; F:oxidoreductase activity
TRUE	INTERPRO	g44973.t1		628									IPR007243 (PFAM); IPR031922 (PFAM)	P:GO:0006914	P:autophagy
TRUE	INTERPRO	g35413.t1		214									IPR001841 (PFAM); IPR001781 (PFAM); IPR009261 (PFAM); IPR018957 (PFAM); PF13832 (PFAM)	F:GO:0005515; F:GO:0008270; F:GO:0046872	F:protein binding; F:zinc ion binding; F:metal ion binding
TRUE	INTERPRO	g31238.t1		335									no IPS match	no IPS match	no IPS match
TRUE	INTERPRO	g27262.t1		993									IPR001611 (PFAM); IPR025875 (PFAM); IPR000719 (PFAM); IPR001611 (PFAM); IPR013210 (PFAM)	P:GO:0006468; F:GO:0004672; F:GO:0005515; F:GO:0005524	P:protein phosphorylation; F:protein kinase activity; F:protein binding; F:ATP binding
TRUE	INTERPRO	g43476.t1		172									IPR001229 (PFAM)	no GO terms	no GO terms
TRUE	INTERPRO	g30855.t1		361									IPR013223 (PFAM); IPR000504 (PFAM)	F:GO:0003676	F:nucleic acid binding
TRUE	INTERPRO	g1884.t1		176									IPR007493 (PFAM); IPR032014 (PFAM)	no GO terms	no GO terms
TRUE	INTERPRO	g3436.t1		353									no IPS match	no IPS match	no IPS match
TRUE	INTERPRO	g17421.t1		221									no IPS match	no IPS match	no IPS match
TRUE	INTERPRO	g10614.t1		188									IPR032737 (PFAM)	no GO terms	no GO terms
TRUE	INTERPRO	g41173.t1		108									IPR002109 (PFAM); PF05764 (PFAM)	P:GO:0045454; F:GO:0009055; F:GO:0015035	P:cell redox homeostasis; F:electron transfer activity; F:protein-disulfide reductase activity
TRUE	INTERPRO	g22169.t1		146									IPR000916 (PFAM)	P:GO:0006952; P:GO:0009607	P:defense response; P:response to biotic stimulus
TRUE	INTERPRO	g30663.t1		440									IPR001878 (PFAM); PF14223 (PFAM); IPR025314 (PFAM)	F:GO:0003676; F:GO:0008270	F:nucleic acid binding; F:zinc ion binding
TRUE	INTERPRO	g17422.t1		104									no IPS match	no IPS match	no IPS match
TRUE	INTERPRO	g20325.t1		353									no IPS match	no IPS match	no IPS match
TRUE	INTERPRO	g23925.t1		488									IPR010438 (PFAM); IPR005199 (PFAM)	F:GO:0016798; C:GO:0009279; C:GO:0016020	F:hydrolase activity, acting on glycosyl bonds; C:cell outer membrane; C:membrane
TRUE	INTERPRO	g18315.t1		432									IPR019023 (PFAM); PF14772 (PFAM); IPR005491 (PFAM); IPR015239 (PFAM)	no GO terms	no GO terms
TRUE	INTERPRO	g19447.t1		240									IPR006214 (PFAM)	no GO terms	no GO terms
TRUE	INTERPRO	g39652.t1		458									PF14223 (PFAM); IPR019518 (PFAM); IPR011516 (PFAM); IPR025314 (PFAM); IPR003106 (PFAM); IPR019320 (PFAM); IPR032486 (PFAM); IPR001878 (PFAM)	P:GO:0006355; F:GO:0003676; F:GO:0003700; F:GO:0008270; F:GO:0043565	P:regulation of DNA-templated transcription; F:nucleic acid binding; F:DNA-binding transcription factor activity; F:zinc ion binding; F:sequence-specific DNA binding
TRUE	INTERPRO	g44459.t1		498									IPR006740 (PFAM); IPR013992 (PFAM)	P:GO:0007010; F:GO:0003779	P:cytoskeleton organization; F:actin binding
TRUE	INTERPRO	g2439.t1		47									no IPS match	no IPS match	no IPS match
TRUE	INTERPRO	g3069.t1		529									IPR002528 (PFAM)	P:GO:0006855; P:GO:0055085; F:GO:0015297; F:GO:0042910; C:GO:0016020	P:xenobiotic transmembrane transport; P:transmembrane transport; F:antiporter activity; F:xenobiotic transmembrane transporter activity; C:membrane
TRUE	INTERPRO	g4251.t1		995									IPR008528 (PFAM); IPR019558 (PFAM)	no GO terms	no GO terms
TRUE	INTERPRO	g2602.t1		507									IPR002554 (PFAM)	P:GO:0007165; F:GO:0019888; C:GO:0000159	P:signal transduction; F:protein phosphatase regulator activity; C:protein phosphatase type 2A complex
TRUE	INTERPRO	g40446.t1		515									IPR002745 (PFAM); IPR005516 (PFAM)	P:GO:0006388; F:GO:0016772	P:tRNA splicing, via endonucleolytic cleavage and ligation; F:transferase activity, transferring phosphorus-containing groups
TRUE	INTERPRO	g45680.t1		1170									IPR025724 (PFAM); IPR013103 (PFAM); IPR001584 (PFAM)	P:GO:0015074	P:DNA integration
TRUE	INTERPRO	g21082.t1		440									IPR025314 (PFAM); IPR001878 (PFAM); PF14223 (PFAM)	F:GO:0003676; F:GO:0008270	F:nucleic acid binding; F:zinc ion binding
TRUE	INTERPRO	g1262.t1		508									IPR005120 (PFAM)	no GO terms	no GO terms
TRUE	INTERPRO	g29988.t1		358									IPR028881 (PFAM); IPR002016 (PFAM); IPR010534 (PFAM)	P:GO:0006979; P:GO:0055114; P:GO:0060567; F:GO:0003677; F:GO:0004601; F:GO:0020037	P:response to oxidative stress; P:obsolete oxidation-reduction process; P:negative regulation of termination of DNA-templated transcription; F:DNA binding; F:peroxidase activity; F:heme binding
TRUE	INTERPRO	g28723.t1		296									IPR007592 (PFAM); IPR024752 (PFAM); PF13837 (PFAM)	P:GO:0006355	P:regulation of DNA-templated transcription
TRUE	INTERPRO	g10899.t1		174									IPR001584 (PFAM); IPR013103 (PFAM)	P:GO:0015074	P:DNA integration
TRUE	INTERPRO	g45334.t1		361									no IPS match	no IPS match	no IPS match
TRUE	INTERPRO	g29553.t1		970									IPR013989 (PFAM)	no GO terms	no GO terms
TRUE	INTERPRO	g5722.t1		388									IPR004963 (PFAM); IPR013272 (PFAM)	F:GO:0016787	F:hydrolase activity
TRUE	INTERPRO	g23630.t1		266									IPR022796 (PFAM)	no GO terms	no GO terms
TRUE	INTERPRO	g33399.t1		119									no IPS match	no IPS match	no IPS match
TRUE	INTERPRO	g7131.t1		464									IPR033388 (PFAM); IPR029453 (PFAM); IPR000225 (PFAM)	F:GO:0005515	F:protein binding
TRUE	INTERPRO	g42770.t1		472									IPR002885 (PFAM); IPR002885 (PFAM); IPR002885 (PFAM); PF14559 (PFAM)	no GO terms	no GO terms
TRUE	INTERPRO	g30686.t1		1498									IPR013581 (PFAM); IPR003439 (PFAM); PF13481 (PFAM); PF13476 (PFAM); IPR013525 (PFAM); IPR004948 (PFAM); IPR029481 (PFAM); IPR019211 (PFAM); IPR010929 (PFAM)	P:GO:0006810; F:GO:0005524; F:GO:0016887; F:GO:0042626; F:GO:0098519; C:GO:0016020; C:GO:0016020	P:transport; F:ATP binding; F:ATP hydrolysis activity; F:ATPase-coupled transmembrane transporter activity; F:obsolete nucleotide phosphatase activity, acting on free nucleotides; C:membrane; C:membrane
TRUE	INTERPRO	g18665.t1		355									no IPS match	no IPS match	no IPS match
TRUE	INTERPRO	g11320.t1		220									no IPS match	no IPS match	no IPS match
TRUE	INTERPRO	g12321.t1		145									PF14223 (PFAM); IPR025314 (PFAM)	no GO terms	no GO terms
TRUE	INTERPRO	g35245.t1		108									no IPS match	no IPS match	no IPS match
TRUE	INTERPRO	g41318.t1		216									no IPS match	no IPS match	no IPS match
TRUE	INTERPRO	g26942.t1		161									IPR022309 (PFAM)	no GO terms	no GO terms
TRUE	INTERPRO	g29863.t2		292									IPR007285 (PFAM); IPR019715 (PFAM); IPR019269 (PFAM); IPR004089 (PFAM); IPR029479 (PFAM); IPR007662 (PFAM); IPR009449 (PFAM); IPR000533 (PFAM); IPR014928 (PFAM); IPR010307 (PFAM); IPR009205 (PFAM); IPR007999 (PFAM)	P:GO:0007155; P:GO:0007165; F:GO:0004871; C:GO:0016020	P:cell adhesion; P:signal transduction; F:obsolete signal transducer activity; C:membrane
TRUE	INTERPRO	g29399.t1		482									IPR000477 (PFAM)	no GO terms	no GO terms
TRUE	INTERPRO	g17451.t1		289									IPR000477 (PFAM)	no GO terms	no GO terms
TRUE	INTERPRO	g8862.t1		335									IPR007217 (PFAM)	no GO terms	no GO terms
TRUE	INTERPRO	g25137.t1		353									no IPS match	no IPS match	no IPS match
TRUE	INTERPRO	g12682.t1		1065									IPR019448 (PFAM)	no GO terms	no GO terms
TRUE	INTERPRO	g40391.t1		185									IPR002048 (PFAM); IPR006847 (PFAM); IPR006829 (PFAM); IPR002048 (PFAM); IPR032352 (PFAM)	F:GO:0005509	F:calcium ion binding
TRUE	INTERPRO	g2830.t1		364									no IPS match	no IPS match	no IPS match
TRUE	INTERPRO	g17211.t1		282									IPR001005 (PFAM)	no GO terms	no GO terms
TRUE	INTERPRO	g24262.t1		320									IPR013078 (PFAM)	no GO terms	no GO terms
TRUE	INTERPRO	g202.t1		289									no IPS match	no IPS match	no IPS match
TRUE	INTERPRO	g12048.t1		216									PF00406 (PFAM); IPR003959 (PFAM); IPR003116 (PFAM)	P:GO:0007165; F:GO:0005057; F:GO:0005524	P:signal transduction; F:obsolete signal transducer activity, downstream of receptor; F:ATP binding
TRUE	INTERPRO	g32245.t1		269									IPR006977 (PFAM)	C:GO:0016020	C:membrane
TRUE	INTERPRO	g28909.t1		235									IPR000210 (PFAM); IPR002745 (PFAM); IPR011705 (PFAM); IPR010643 (PFAM)	P:GO:0006388; F:GO:0005515; F:GO:0016772	P:tRNA splicing, via endonucleolytic cleavage and ligation; F:protein binding; F:transferase activity, transferring phosphorus-containing groups
TRUE	INTERPRO	g40628.t1		338									PF14223 (PFAM); IPR001878 (PFAM)	F:GO:0003676; F:GO:0008270	F:nucleic acid binding; F:zinc ion binding
TRUE	INTERPRO	g19398.t1		556									IPR002589 (PFAM); IPR001251 (PFAM)	no GO terms	no GO terms
TRUE	INTERPRO	g7483.t1		876									IPR024788 (PFAM); IPR001245 (PFAM)	P:GO:0006468; F:GO:0004672	P:protein phosphorylation; F:protein kinase activity
TRUE	INTERPRO	g1998.t1		224									IPR001313 (PFAM); IPR026960 (PFAM)	F:GO:0003723	F:RNA binding
TRUE	INTERPRO	g32971.t1		375									IPR002901 (PFAM); IPR001471 (PFAM)	P:GO:0006355; F:GO:0003700; F:GO:0004040	P:regulation of DNA-templated transcription; F:DNA-binding transcription factor activity; F:amidase activity
TRUE	INTERPRO	g45400.t1		553									IPR001962 (PFAM); IPR024286 (PFAM); IPR017932 (PFAM)	P:GO:0006529; F:GO:0004066	P:asparagine biosynthetic process; F:asparagine synthase (glutamine-hydrolyzing) activity
TRUE	INTERPRO	g35318.t1		590									IPR003657 (PFAM)	P:GO:0006355; F:GO:0003700; F:GO:0043565	P:regulation of DNA-templated transcription; F:DNA-binding transcription factor activity; F:sequence-specific DNA binding
TRUE	INTERPRO	g10095.t1		112									no IPS match	no IPS match	no IPS match
TRUE	INTERPRO	g43992.t1		135									no IPS match	no IPS match	no IPS match
TRUE	INTERPRO	g10457.t1		108									no IPS match	no IPS match	no IPS match
TRUE	INTERPRO	g25964.t1		216									IPR008162 (PFAM)	P:GO:0006796; F:GO:0000287; F:GO:0004427; C:GO:0005737	P:phosphate-containing compound metabolic process; F:magnesium ion binding; F:inorganic diphosphate phosphatase activity; C:cytoplasm
TRUE	INTERPRO	g9109.t1		266									IPR033371 (PFAM)	no GO terms	no GO terms
TRUE	INTERPRO	g26541.t1		693									IPR013105 (PFAM); PF13432 (PFAM); PF13431 (PFAM); IPR019734 (PFAM); IPR003107 (PFAM); PF13428 (PFAM); PF14559 (PFAM); IPR008847 (PFAM); IPR005607 (PFAM)	P:GO:0006396; P:GO:0006397; F:GO:0005515; C:GO:0005634	P:RNA processing; P:mRNA processing; F:protein binding; C:nucleus
TRUE	INTERPRO	g7856.t1		331									IPR001164 (PFAM); IPR001955 (PFAM); IPR000008 (PFAM)	F:GO:0005096; F:GO:0005179; F:GO:0005515; C:GO:0005576	F:GTPase activator activity; F:hormone activity; F:protein binding; C:extracellular region
TRUE	INTERPRO	g35940.t1		148									IPR000608 (PFAM)	no GO terms	no GO terms
TRUE	INTERPRO	g28666.t1		108									no IPS match	no IPS match	no IPS match
TRUE	INTERPRO	g1903.t1		192									IPR019002 (PFAM); IPR001374 (PFAM)	F:GO:0003676	F:nucleic acid binding
TRUE	INTERPRO	g35775.t1		369									IPR032795 (PFAM)	no GO terms	no GO terms
TRUE	INTERPRO	g1710.t1		1158									IPR032535 (PFAM); IPR032881 (PFAM)	no GO terms	no GO terms
TRUE	INTERPRO	g36722.t1		353									no IPS match	no IPS match	no IPS match
TRUE	INTERPRO	g35178.t1		345									IPR008521 (PFAM)	P:GO:0015693; F:GO:0015095; C:GO:0016020	P:magnesium ion transport; F:magnesium ion transmembrane transporter activity; C:membrane
TRUE	INTERPRO	g23711.t1		169									no IPS match	no IPS match	no IPS match
TRUE	INTERPRO	g17120.t1		663									PF13428 (PFAM); IPR002885 (PFAM); IPR032867 (PFAM); IPR010604 (PFAM); IPR002885 (PFAM); IPR002885 (PFAM); IPR013394 (PFAM)	F:GO:0008270	F:zinc ion binding
TRUE	INTERPRO	g10998.t1		561									IPR005202 (PFAM); IPR021914 (PFAM); IPR012476 (PFAM); IPR003797 (PFAM)	P:GO:0016973; C:GO:0005643	P:poly(A)+ mRNA export from nucleus; C:nuclear pore
TRUE	INTERPRO	g22911.t1		237									IPR000352 (PFAM)	P:GO:0006415; F:GO:0003747	P:translational termination; F:translation release factor activity
TRUE	INTERPRO	g24299.t1		271									IPR000477 (PFAM)	no GO terms	no GO terms
TRUE	INTERPRO	g1402.t1		386									IPR025273 (PFAM); IPR012936 (PFAM); PF13850 (PFAM)	no GO terms	no GO terms
TRUE	INTERPRO	g36978.t1		347									IPR001048 (PFAM)	no GO terms	no GO terms
TRUE	INTERPRO	g5514.t1		159									no IPS match	no IPS match	no IPS match
TRUE	INTERPRO	g34141.t1		363									IPR032071 (PFAM); IPR025422 (PFAM); IPR004827 (PFAM); IPR004827 (PFAM); IPR007157 (PFAM)	P:GO:0006351; P:GO:0006355; F:GO:0003700; F:GO:0043565	P:DNA-templated transcription; P:regulation of DNA-templated transcription; F:DNA-binding transcription factor activity; F:sequence-specific DNA binding
TRUE	INTERPRO	g12553.t1		495									IPR001841 (PFAM)	F:GO:0005515; F:GO:0008270	F:protein binding; F:zinc ion binding
TRUE	INTERPRO	g14161.t1		417									IPR025064 (PFAM); IPR009758 (PFAM); IPR000048 (PFAM)	F:GO:0005515	F:protein binding
TRUE	INTERPRO	g28394.t1		318									IPR004864 (PFAM); IPR019443 (PFAM)	no GO terms	no GO terms
TRUE	INTERPRO	g34660.t1		249									IPR004254 (PFAM); IPR004695 (PFAM); IPR008901 (PFAM)	P:GO:0006672; P:GO:0055085; F:GO:0016811; C:GO:0016020	P:ceramide metabolic process; P:transmembrane transport; F:hydrolase activity, acting on carbon-nitrogen (but not peptide) bonds, in linear amides; C:membrane
TRUE	INTERPRO	g33830.t2		318									IPR001509 (PFAM)	F:GO:0003824; F:GO:0050662	F:catalytic activity; F:obsolete coenzyme binding
TRUE	INTERPRO	g24323.t1		860									IPR026822 (PFAM); IPR022783 (PFAM); IPR022091 (PFAM); IPR000467 (PFAM); IPR022159 (PFAM)	P:GO:0006355; F:GO:0003676; F:GO:0003677; C:GO:0005634	P:regulation of DNA-templated transcription; F:nucleic acid binding; F:DNA binding; C:nucleus
TRUE	INTERPRO	g27854.t1		141									IPR031594 (PFAM)	no GO terms	no GO terms
TRUE	INTERPRO	g27797.t1		609									IPR031404 (PFAM); IPR022812 (PFAM); IPR003130 (PFAM); IPR000375 (PFAM)	F:GO:0003924; F:GO:0005525	F:GTPase activity; F:GTP binding
TRUE	INTERPRO	g8075.t1		110									no IPS match	no IPS match	no IPS match
TRUE	INTERPRO	g24373.t1		223									IPR001611 (PFAM); IPR001611 (PFAM)	F:GO:0005515	F:protein binding
TRUE	INTERPRO	g5600.t1		225									IPR008906 (PFAM); IPR010927 (PFAM)	F:GO:0046983	F:protein dimerization activity
TRUE	INTERPRO	g21192.t1		839									IPR013978 (PFAM); IPR004827 (PFAM); IPR029385 (PFAM); IPR011684 (PFAM); IPR001356 (PFAM); IPR002913 (PFAM)	P:GO:0006355; F:GO:0003677; F:GO:0003700; F:GO:0003779; F:GO:0008289; F:GO:0043565	P:regulation of DNA-templated transcription; F:DNA binding; F:DNA-binding transcription factor activity; F:actin binding; F:lipid binding; F:sequence-specific DNA binding
TRUE	INTERPRO	g1483.t1		113									IPR016140 (PFAM); IPR012515 (PFAM)	P:GO:0042742	P:defense response to bacterium
TRUE	INTERPRO	g17702.t1		107									IPR025314 (PFAM)	no GO terms	no GO terms
TRUE	INTERPRO	g22311.t1		251									IPR018957 (PFAM)	F:GO:0046872	F:metal ion binding
TRUE	INTERPRO	g4656.t1		814									IPR022212 (PFAM); IPR025486 (PFAM); IPR032494 (PFAM); IPR011490 (PFAM)	no GO terms	no GO terms
TRUE	INTERPRO	g40423.t1		353									no IPS match	no IPS match	no IPS match
TRUE	INTERPRO	g43068.t1		437									IPR002372 (PFAM); IPR011498 (PFAM); IPR001810 (PFAM); PF13964 (PFAM); IPR006652 (PFAM)	F:GO:0005515	F:protein binding
TRUE	INTERPRO	g12328.t1		113									PF00428 (PFAM); IPR010436 (PFAM); IPR027950 (PFAM)	no GO terms	no GO terms
TRUE	INTERPRO	g21621.t1		172									IPR003106 (PFAM); PF14223 (PFAM)	P:GO:0006355; F:GO:0003700; F:GO:0043565	P:regulation of DNA-templated transcription; F:DNA-binding transcription factor activity; F:sequence-specific DNA binding
TRUE	INTERPRO	g19181.t1		371									IPR003137 (PFAM); IPR000262 (PFAM); IPR008251 (PFAM)	F:GO:0016491; C:GO:0005634	F:oxidoreductase activity; C:nucleus
TRUE	INTERPRO	g24357.t1		429									IPR000357 (PFAM); IPR025288 (PFAM); PF13646 (PFAM); IPR025271 (PFAM)	F:GO:0005515	F:protein binding
TRUE	INTERPRO	g20870.t1		93									IPR018793 (PFAM); IPR003213 (PFAM); IPR007918 (PFAM); IPR023184 (PFAM); IPR007745 (PFAM)	P:GO:0006825; F:GO:0004129; F:GO:0005507; F:GO:0016531; C:GO:0005739; C:GO:0005758	P:copper ion transport; F:cytochrome-c oxidase activity; F:copper ion binding; F:copper chaperone activity; C:mitochondrion; C:mitochondrial intermembrane space
TRUE	INTERPRO	g2894.t1		252									IPR020818 (PFAM)	P:GO:0006457; C:GO:0005737	P:protein folding; C:cytoplasm
TRUE	INTERPRO	g41416.t1		571									IPR001117 (PFAM); IPR011707 (PFAM); IPR003901 (PFAM); IPR011706 (PFAM)	P:GO:0015948; P:GO:0055114; F:GO:0005507; F:GO:0016491	P:methanogenesis; P:obsolete oxidation-reduction process; F:copper ion binding; F:oxidoreductase activity
TRUE	INTERPRO	g20347.t1		278									IPR001005 (PFAM); IPR021661 (PFAM)	no GO terms	no GO terms
TRUE	INTERPRO	g3437.t1		135									IPR005162 (PFAM)	no GO terms	no GO terms
TRUE	INTERPRO	g17376.t1		378									no IPS match	no IPS match	no IPS match
TRUE	INTERPRO	g44416.t1		531									IPR000477 (PFAM)	no GO terms	no GO terms
TRUE	INTERPRO	g28012.t1		529									no IPS match	no IPS match	no IPS match
TRUE	INTERPRO	g25643.t1		351									no IPS match	no IPS match	no IPS match
TRUE	INTERPRO	g36634.t1		484									IPR000306 (PFAM); IPR007461 (PFAM)	F:GO:0046872	F:metal ion binding
TRUE	INTERPRO	g40487.t1		364									no IPS match	no IPS match	no IPS match
TRUE	INTERPRO	g42669.t1		372									IPR006891 (PFAM)	no GO terms	no GO terms
TRUE	INTERPRO	g34000.t1		512									IPR024319 (PFAM); IPR002885 (PFAM); IPR002885 (PFAM); IPR002885 (PFAM); IPR033443 (PFAM); IPR031813 (PFAM)	no GO terms	no GO terms
TRUE	INTERPRO	g7434.t1		337									PF14223 (PFAM); IPR001878 (PFAM)	F:GO:0003676; F:GO:0008270	F:nucleic acid binding; F:zinc ion binding
TRUE	INTERPRO	g45781.t1		253									IPR024286 (PFAM)	no GO terms	no GO terms
TRUE	INTERPRO	g31946.t1		304									IPR019294 (PFAM); PF14223 (PFAM); IPR025314 (PFAM); IPR001878 (PFAM)	F:GO:0003676; F:GO:0008270	F:nucleic acid binding; F:zinc ion binding
TRUE	INTERPRO	g18149.t1		219									IPR031100 (PFAM)	no GO terms	no GO terms
TRUE	INTERPRO	g1936.t1		249									IPR001623 (PFAM)	no GO terms	no GO terms
TRUE	INTERPRO	g30364.t1		186									IPR008932 (PFAM); IPR000241 (PFAM); IPR013823 (PFAM)	P:GO:0006412; F:GO:0003735; C:GO:0005622; C:GO:0005840	P:translation; F:structural constituent of ribosome; C:intracellular anatomical structure; C:ribosome
TRUE	INTERPRO	g2600.t1		175									no IPS match	no IPS match	no IPS match
TRUE	INTERPRO	g19944.t1		338									IPR001509 (PFAM)	F:GO:0003824; F:GO:0050662	F:catalytic activity; F:obsolete coenzyme binding
TRUE	INTERPRO	g26514.t1		278									IPR001328 (PFAM)	F:GO:0004045	F:aminoacyl-tRNA hydrolase activity
TRUE	INTERPRO	g29557.t2		325									IPR004045 (PFAM); PF13410 (PFAM)	F:GO:0005515	F:protein binding
TRUE	INTERPRO	g1139.t1		338									IPR007671 (PFAM); IPR001878 (PFAM); PF14223 (PFAM)	F:GO:0003676; F:GO:0008270	F:nucleic acid binding; F:zinc ion binding
TRUE	INTERPRO	g24365.t1		317									IPR005123 (PFAM); IPR026992 (PFAM)	P:GO:0055114; F:GO:0016491	P:obsolete oxidation-reduction process; F:oxidoreductase activity
TRUE	INTERPRO	g15129.t1		1157									IPR025724 (PFAM); IPR001584 (PFAM); IPR013103 (PFAM)	P:GO:0015074	P:DNA integration
TRUE	INTERPRO	g37266.t1		353									no IPS match	no IPS match	no IPS match
TRUE	INTERPRO	g41666.t1		341									IPR004853 (PFAM); IPR018770 (PFAM)	no GO terms	no GO terms
TRUE	INTERPRO	g28778.t1		444									IPR002110 (PFAM); IPR002110 (PFAM); IPR020683 (PFAM); IPR008840 (PFAM)	F:GO:0005515	F:protein binding
TRUE	INTERPRO	g1188.t1		480									IPR004326 (PFAM)	P:GO:0006952; C:GO:0016020	P:defense response; C:membrane
TRUE	INTERPRO	g22738.t1		738									IPR005828 (PFAM)	P:GO:0055085; F:GO:0022857; C:GO:0016020	P:transmembrane transport; F:transmembrane transporter activity; C:membrane
TRUE	INTERPRO	g627.t1		137									IPR002108 (PFAM)	F:GO:0003779; C:GO:0005622	F:actin binding; C:intracellular anatomical structure
TRUE	INTERPRO	g45589.t1		170									IPR007867 (PFAM); IPR011436 (PFAM); IPR004252 (PFAM)	P:GO:0055114; F:GO:0016614	P:obsolete oxidation-reduction process; F:oxidoreductase activity, acting on CH-OH group of donors
TRUE	INTERPRO	g24363.t1		195									IPR005123 (PFAM)	P:GO:0055114; F:GO:0016491	P:obsolete oxidation-reduction process; F:oxidoreductase activity
TRUE	INTERPRO	g42478.t1		331									IPR009577 (PFAM)	no GO terms	no GO terms
TRUE	INTERPRO	g3223.t1		249									IPR020818 (PFAM); IPR001254 (PFAM)	P:GO:0006457; P:GO:0006508; F:GO:0004252; C:GO:0005737	P:protein folding; P:proteolysis; F:serine-type endopeptidase activity; C:cytoplasm
TRUE	INTERPRO	g10386.t1		213									no IPS match	no IPS match	no IPS match
TRUE	INTERPRO	g33721.t1		238									IPR026960 (PFAM)	no GO terms	no GO terms
TRUE	INTERPRO	g13583.t1		167									IPR006501 (PFAM)	F:GO:0004857	F:enzyme inhibitor activity
TRUE	INTERPRO	g12581.t1		439									IPR007751 (PFAM)	no GO terms	no GO terms
TRUE	INTERPRO	g9531.t1		108									no IPS match	no IPS match	no IPS match
TRUE	INTERPRO	g44417.t1		190									IPR004776 (PFAM)	P:GO:0055085; C:GO:0016020	P:transmembrane transport; C:membrane
TRUE	INTERPRO	g18109.t1		355									no IPS match	no IPS match	no IPS match
TRUE	INTERPRO	g15602.t1		470									IPR003000 (PFAM)	F:GO:0070403	F:NAD+ binding
TRUE	INTERPRO	g11444.t1		406									IPR025724 (PFAM); IPR024599 (PFAM); IPR001584 (PFAM)	P:GO:0015074	P:DNA integration
TRUE	INTERPRO	g43731.t1		274									IPR023562 (PFAM); IPR009474 (PFAM)	no GO terms	no GO terms
TRUE	INTERPRO	g3474.t1		302									no IPS match	no IPS match	no IPS match
TRUE	INTERPRO	g11355.t1		429									no IPS match	no IPS match	no IPS match
TRUE	INTERPRO	g36769.t1		220									no IPS match	no IPS match	no IPS match
TRUE	INTERPRO	g36941.t1		342									IPR005123 (PFAM); IPR026992 (PFAM)	P:GO:0055114; F:GO:0016491	P:obsolete oxidation-reduction process; F:oxidoreductase activity
TRUE	INTERPRO	g42968.t1		161									PF01190 (PFAM)	no GO terms	no GO terms
TRUE	INTERPRO	g8833.t1		186									no IPS match	no IPS match	no IPS match
TRUE	INTERPRO	g1762.t1		721									IPR000571 (PFAM); IPR002004 (PFAM); IPR000504 (PFAM)	F:GO:0003676; F:GO:0003723; F:GO:0046872	F:nucleic acid binding; F:RNA binding; F:metal ion binding
TRUE	INTERPRO	g6385.t1		663									IPR007308 (PFAM)	no GO terms	no GO terms
TRUE	INTERPRO	g30761.t1		739									IPR014808 (PFAM); IPR006868 (PFAM); IPR006867 (PFAM)	no GO terms	no GO terms
TRUE	INTERPRO	g13560.t1		565									IPR025724 (PFAM); IPR001584 (PFAM)	P:GO:0015074	P:DNA integration
TRUE	INTERPRO	g9880.t1		465									IPR013103 (PFAM)	no GO terms	no GO terms
TRUE	INTERPRO	g37227.t1		338									IPR001878 (PFAM); PF14223 (PFAM)	F:GO:0003676; F:GO:0008270	F:nucleic acid binding; F:zinc ion binding
TRUE	INTERPRO	g18368.t1		178									IPR000086 (PFAM)	F:GO:0016787	F:hydrolase activity
TRUE	INTERPRO	g3914.t1		436									IPR019357 (PFAM); PF14223 (PFAM); IPR025593 (PFAM); IPR025314 (PFAM); IPR015056 (PFAM)	P:GO:0006914; P:GO:0048870; C:GO:0031514	P:autophagy; P:cell motility; C:motile cilium
TRUE	INTERPRO	g28199.t1		108									no IPS match	no IPS match	no IPS match
TRUE	INTERPRO	g5997.t1		52									no IPS match	no IPS match	no IPS match
TRUE	INTERPRO	g9400.t1		311									PF14223 (PFAM); IPR013848 (PFAM); IPR029472 (PFAM); IPR001878 (PFAM)	P:GO:0009451; F:GO:0003676; F:GO:0003824; F:GO:0008270; F:GO:0051539	P:RNA modification; F:nucleic acid binding; F:catalytic activity; F:zinc ion binding; F:4 iron, 4 sulfur cluster binding
TRUE	INTERPRO	g42145.t1		407									IPR013103 (PFAM); IPR002156 (PFAM)	F:GO:0003676; F:GO:0004523	F:nucleic acid binding; F:RNA-DNA hybrid ribonuclease activity
TRUE	INTERPRO	g29784.t1		475									IPR002208 (PFAM); IPR019561 (PFAM)	P:GO:0015031; C:GO:0016020	P:protein transport; C:membrane
TRUE	INTERPRO	g27356.t1		475									IPR002208 (PFAM); IPR019561 (PFAM)	P:GO:0015031; C:GO:0016020	P:protein transport; C:membrane
TRUE	INTERPRO	g34320.t1		766									IPR004159 (PFAM)	F:GO:0008168	F:methyltransferase activity
TRUE	INTERPRO	g15770.t1		88									IPR005513 (PFAM)	P:GO:0009790	P:embryo development
TRUE	INTERPRO	g9936.t1		719									IPR007527 (PFAM); IPR018289 (PFAM); IPR004332 (PFAM)	F:GO:0008270	F:zinc ion binding
TRUE	INTERPRO	g21725.t3		692									IPR001701 (PFAM)	P:GO:0005975; F:GO:0004553	P:carbohydrate metabolic process; F:hydrolase activity, hydrolyzing O-glycosyl compounds
TRUE	INTERPRO	g6599.t1		290									IPR031526 (PFAM); IPR018737 (PFAM)	P:GO:0006351; P:GO:0007049; C:GO:0070176	P:DNA-templated transcription; P:cell cycle; C:DRM complex
TRUE	INTERPRO	g38064.t1		271									IPR003656 (PFAM)	F:GO:0003677	F:DNA binding
TRUE	INTERPRO	g6188.t1		801									IPR026960 (PFAM); IPR000477 (PFAM)	no GO terms	no GO terms
TRUE	INTERPRO	g31195.t1		190									IPR001781 (PFAM); IPR007803 (PFAM); IPR000518 (PFAM)	P:GO:0018193; F:GO:0008270; F:GO:0046872	P:peptidyl-amino acid modification; F:zinc ion binding; F:metal ion binding
TRUE	INTERPRO	g25957.t1		564									IPR007647 (PFAM); IPR007645 (PFAM); IPR032544 (PFAM); IPR007646 (PFAM); IPR007120 (PFAM)	P:GO:0006351; F:GO:0003677; F:GO:0003899	P:DNA-templated transcription; F:DNA binding; F:DNA-directed 5'-3' RNA polymerase activity
TRUE	INTERPRO	g22414.t1		467									IPR025486 (PFAM); IPR007015 (PFAM); IPR005595 (PFAM)	P:GO:0006351; F:GO:0003677; F:GO:0003887; C:GO:0005789	P:DNA-templated transcription; F:DNA binding; F:DNA-directed DNA polymerase activity; C:endoplasmic reticulum membrane
TRUE	INTERPRO	g19754.t1		306									IPR003175 (PFAM); IPR006769 (PFAM)	P:GO:0051726; F:GO:0004861; C:GO:0005634	P:regulation of cell cycle; F:cyclin-dependent protein serine/threonine kinase inhibitor activity; C:nucleus
TRUE	INTERPRO	g11211.t1		179									no IPS match	no IPS match	no IPS match
TRUE	INTERPRO	g7525.t1		100									IPR002109 (PFAM)	P:GO:0045454; F:GO:0009055; F:GO:0015035	P:cell redox homeostasis; F:electron transfer activity; F:protein-disulfide reductase activity
TRUE	INTERPRO	g1220.t1		1083									IPR007848 (PFAM); IPR004839 (PFAM); IPR030382 (PFAM); IPR025714 (PFAM); IPR032398 (PFAM)	P:GO:0009058; F:GO:0008168; F:GO:0030170	P:biosynthetic process; F:methyltransferase activity; F:pyridoxal phosphate binding
TRUE	INTERPRO	g28628.t1		1086									no IPS match	no IPS match	no IPS match
TRUE	INTERPRO	g20972.t1		360									IPR000184 (PFAM)	C:GO:0019867	C:outer membrane
TRUE	INTERPRO	g19283.t1		1037									no IPS match	no IPS match	no IPS match
TRUE	INTERPRO	g11502.t1		681									IPR013210 (PFAM); IPR001245 (PFAM); IPR001611 (PFAM); IPR001611 (PFAM)	P:GO:0006468; F:GO:0004672; F:GO:0005515	P:protein phosphorylation; F:protein kinase activity; F:protein binding
TRUE	INTERPRO	g11149.t1		427									IPR000719 (PFAM)	P:GO:0006468; F:GO:0004672; F:GO:0005524	P:protein phosphorylation; F:protein kinase activity; F:ATP binding
TRUE	INTERPRO	g34031.t1		132									no IPS match	no IPS match	no IPS match
TRUE	INTERPRO	g15238.t1		322									IPR009818 (PFAM); IPR000504 (PFAM); IPR015148 (PFAM)	F:GO:0003676	F:nucleic acid binding
TRUE	INTERPRO	g31350.t1		509									IPR032327 (PFAM); IPR013923 (PFAM); IPR001680 (PFAM)	F:GO:0005515	F:protein binding
TRUE	INTERPRO	g16876.t1		1325									IPR025724 (PFAM); IPR013103 (PFAM); IPR001878 (PFAM); IPR001584 (PFAM); PF14223 (PFAM)	P:GO:0015074; F:GO:0003676; F:GO:0008270	P:DNA integration; F:nucleic acid binding; F:zinc ion binding
TRUE	INTERPRO	g45935.t1		257									IPR022383 (PFAM); IPR001236 (PFAM); IPR010741 (PFAM)	P:GO:0055114; F:GO:0016491; F:GO:0016616	P:obsolete oxidation-reduction process; F:oxidoreductase activity; F:oxidoreductase activity, acting on the CH-OH group of donors, NAD or NADP as acceptor
TRUE	INTERPRO	g46049.t1		257									IPR000620 (PFAM)	C:GO:0016020; C:GO:0016020	C:membrane; C:membrane
TRUE	INTERPRO	g6792.t1		775									IPR002498 (PFAM); IPR003409 (PFAM)	P:GO:0046488; F:GO:0016307	P:phosphatidylinositol metabolic process; F:obsolete phosphatidylinositol phosphate kinase activity
TRUE	INTERPRO	g15916.t1		262									IPR001245 (PFAM); IPR007920 (PFAM)	P:GO:0006468; F:GO:0004672	P:protein phosphorylation; F:protein kinase activity
TRUE	INTERPRO	g86.t1		96									IPR003676 (PFAM)	P:GO:0009733	P:response to auxin
TRUE	INTERPRO	g907.t1		394									IPR010903 (PFAM)	no GO terms	no GO terms
TRUE	INTERPRO	g386.t1		387									IPR018611 (PFAM); IPR001932 (PFAM)	F:GO:0003824	F:catalytic activity
TRUE	INTERPRO	g19859.t1		136									IPR000136 (PFAM)	C:GO:0012511; C:GO:0016020	C:monolayer-surrounded lipid storage body; C:membrane
TRUE	INTERPRO	g23296.t1		395									no IPS match	no IPS match	no IPS match
TRUE	INTERPRO	g32726.t1		569									IPR009988 (PFAM); IPR032272 (PFAM); IPR001580 (PFAM)	P:GO:0006457; F:GO:0005509; F:GO:0051082; C:GO:0005783	P:protein folding; F:calcium ion binding; F:unfolded protein binding; C:endoplasmic reticulum
TRUE	INTERPRO	g27786.t1		233									IPR000711 (PFAM)	P:GO:0015986; F:GO:0046933	P:proton motive force-driven ATP synthesis; F:proton-transporting ATP synthase activity, rotational mechanism
TRUE	INTERPRO	g31754.t1		692									IPR013103 (PFAM)	no GO terms	no GO terms
TRUE	INTERPRO	g40625.t1		429									IPR012943 (PFAM); IPR025593 (PFAM); IPR001878 (PFAM); IPR025314 (PFAM); IPR021622 (PFAM); IPR002490 (PFAM); PF14223 (PFAM); IPR032486 (PFAM); IPR018757 (PFAM)	P:GO:0048870; P:GO:1902600; F:GO:0003676; F:GO:0008270; F:GO:0015078; C:GO:0005815; C:GO:0031514; C:GO:0033179	P:cell motility; P:proton transmembrane transport; F:nucleic acid binding; F:zinc ion binding; F:proton transmembrane transporter activity; C:microtubule organizing center; C:motile cilium; C:proton-transporting V-type ATPase, V0 domain
TRUE	INTERPRO	g20294.t1		431									IPR016040 (PFAM)	no GO terms	no GO terms
TRUE	INTERPRO	g31690.t1		338									PF14223 (PFAM); IPR001878 (PFAM); IPR007671 (PFAM)	F:GO:0003676; F:GO:0008270	F:nucleic acid binding; F:zinc ion binding
TRUE	INTERPRO	g7735.t1		338									PF14223 (PFAM); IPR001878 (PFAM); IPR007671 (PFAM)	F:GO:0003676; F:GO:0008270	F:nucleic acid binding; F:zinc ion binding
TRUE	INTERPRO	g43609.t1		442									IPR001247 (PFAM); IPR000101 (PFAM); IPR015847 (PFAM)	P:GO:0006749; F:GO:0003840	P:glutathione metabolic process; F:obsolete gamma-glutamyltransferase activity
TRUE	INTERPRO	g17976.t1		666									IPR001453 (PFAM); IPR005111 (PFAM); IPR005110 (PFAM)	P:GO:0032324	P:molybdopterin cofactor biosynthetic process
TRUE	INTERPRO	g33305.t1		256									IPR003653 (PFAM)	P:GO:0006508; F:GO:0008234	P:proteolysis; F:cysteine-type peptidase activity
TRUE	INTERPRO	g45227.t1		146									no IPS match	no IPS match	no IPS match
TRUE	INTERPRO	g5628.t1		338									PF14223 (PFAM); IPR001878 (PFAM)	F:GO:0003676; F:GO:0008270	F:nucleic acid binding; F:zinc ion binding
TRUE	INTERPRO	g12790.t2		372									IPR001005 (PFAM)	no GO terms	no GO terms
TRUE	INTERPRO	g8653.t1		146									IPR000136 (PFAM)	C:GO:0012511; C:GO:0016020	C:monolayer-surrounded lipid storage body; C:membrane
TRUE	INTERPRO	g13151.t1		107									no IPS match	no IPS match	no IPS match
TRUE	INTERPRO	g10047.t1		361									IPR004000 (PFAM)	no GO terms	no GO terms
TRUE	INTERPRO	g41704.t1		451									IPR008906 (PFAM); IPR003656 (PFAM); IPR025525 (PFAM)	F:GO:0003677; F:GO:0046983	F:DNA binding; F:protein dimerization activity
TRUE	INTERPRO	g1157.t1		305									IPR019294 (PFAM); IPR019452 (PFAM); PF14223 (PFAM); IPR019882 (PFAM); IPR025314 (PFAM); IPR001878 (PFAM)	F:GO:0003676; F:GO:0008270	F:nucleic acid binding; F:zinc ion binding
TRUE	INTERPRO	g28193.t1		226									no IPS match	no IPS match	no IPS match
TRUE	INTERPRO	g24120.t2		339									IPR004367 (PFAM); IPR006671 (PFAM)	C:GO:0005634	C:nucleus
TRUE	INTERPRO	g4286.t1		502									IPR032861 (PFAM); IPR032799 (PFAM)	no GO terms	no GO terms
TRUE	INTERPRO	g40066.t1		350									no IPS match	no IPS match	no IPS match
TRUE	INTERPRO	g7615.t1		338									IPR001878 (PFAM); PF14223 (PFAM)	F:GO:0003676; F:GO:0008270	F:nucleic acid binding; F:zinc ion binding
TRUE	INTERPRO	g38478.t1		338									PF14223 (PFAM); IPR001878 (PFAM)	F:GO:0003676; F:GO:0008270	F:nucleic acid binding; F:zinc ion binding
TRUE	INTERPRO	g38098.t1		523									IPR000008 (PFAM)	F:GO:0005515	F:protein binding
TRUE	INTERPRO	g27387.t2		231									IPR002100 (PFAM); IPR002487 (PFAM)	P:GO:0006355; F:GO:0003677; F:GO:0003700; F:GO:0046983; C:GO:0005634	P:regulation of DNA-templated transcription; F:DNA binding; F:DNA-binding transcription factor activity; F:protein dimerization activity; C:nucleus
TRUE	INTERPRO	g13785.t1		454									PF13248 (PFAM); IPR004997 (PFAM); IPR004855 (PFAM)	P:GO:0006367; P:GO:0019079; F:GO:0030337; C:GO:0005672	P:transcription initiation at RNA polymerase II promoter; P:viral genome replication; F:DNA polymerase processivity factor activity; C:transcription factor TFIIA complex
TRUE	INTERPRO	g10592.t1		177									IPR029004 (PFAM); IPR013665 (PFAM)	no GO terms	no GO terms
TRUE	INTERPRO	g41419.t1		121									IPR000782 (PFAM)	no GO terms	no GO terms
TRUE	INTERPRO	g35259.t1		353									no IPS match	no IPS match	no IPS match
TRUE	INTERPRO	g44021.t1		794									PF13692 (PFAM)	no GO terms	no GO terms
TRUE	INTERPRO	g5808.t1		182									no IPS match	no IPS match	no IPS match
TRUE	INTERPRO	g13143.t1		166									no IPS match	no IPS match	no IPS match
TRUE	INTERPRO	g37273.t1		361									IPR004000 (PFAM)	no GO terms	no GO terms
TRUE	INTERPRO	g45857.t1		356									IPR003657 (PFAM); IPR025593 (PFAM); IPR002523 (PFAM)	P:GO:0006355; P:GO:0030001; P:GO:0048870; P:GO:0055085; F:GO:0003700; F:GO:0043565; F:GO:0046873; C:GO:0016020; C:GO:0031514	P:regulation of DNA-templated transcription; P:metal ion transport; P:cell motility; P:transmembrane transport; F:DNA-binding transcription factor activity; F:sequence-specific DNA binding; F:metal ion transmembrane transporter activity; C:membrane; C:motile cilium
TRUE	INTERPRO	g17335.t1		416									PF01163 (PFAM); IPR004041 (PFAM); IPR000719 (PFAM)	P:GO:0006468; P:GO:0007165; F:GO:0004672; F:GO:0005524	P:protein phosphorylation; P:signal transduction; F:protein kinase activity; F:ATP binding
TRUE	INTERPRO	g44547.t1		121									no IPS match	no IPS match	no IPS match
TRUE	INTERPRO	g13673.t1		276									no IPS match	no IPS match	no IPS match
TRUE	INTERPRO	g6811.t1		406									IPR033443 (PFAM); IPR002885 (PFAM); IPR013394 (PFAM); IPR032867 (PFAM); IPR002885 (PFAM); IPR002885 (PFAM)	F:GO:0008270	F:zinc ion binding
TRUE	INTERPRO	g14816.t1		175									no IPS match	no IPS match	no IPS match
TRUE	INTERPRO	g32140.t1		148									no IPS match	no IPS match	no IPS match
TRUE	INTERPRO	g20344.t1		298									PF00406 (PFAM); IPR003489 (PFAM); IPR021136 (PFAM)	P:GO:0044238	P:primary metabolic process
TRUE	INTERPRO	g2953.t1		346									no IPS match	no IPS match	no IPS match
TRUE	INTERPRO	g80.t1		265									IPR003735 (PFAM); IPR000845 (PFAM)	P:GO:0006355; P:GO:0009116; F:GO:0003677; F:GO:0003824; F:GO:0046872	P:regulation of DNA-templated transcription; P:nucleoside metabolic process; F:DNA binding; F:catalytic activity; F:metal ion binding
TRUE	INTERPRO	g30119.t1		654									IPR003441 (PFAM)	P:GO:0006355; F:GO:0003677	P:regulation of DNA-templated transcription; F:DNA binding
TRUE	INTERPRO	g35302.t1		389									IPR005299 (PFAM)	F:GO:0008168	F:methyltransferase activity
TRUE	INTERPRO	g32491.t1		338									PF14223 (PFAM); IPR001878 (PFAM)	F:GO:0003676; F:GO:0008270	F:nucleic acid binding; F:zinc ion binding
TRUE	INTERPRO	g37436.t1		207									IPR001128 (PFAM)	P:GO:0055114; F:GO:0005506; F:GO:0016705; F:GO:0020037	P:obsolete oxidation-reduction process; F:iron ion binding; F:oxidoreductase activity, acting on paired donors, with incorporation or reduction of molecular oxygen; F:heme binding
TRUE	INTERPRO	g13565.t1		481									IPR010829 (PFAM); IPR002213 (PFAM)	P:GO:0008152; F:GO:0016758	P:metabolic process; F:hexosyltransferase activity
TRUE	INTERPRO	g42219.t1		100									no IPS match	no IPS match	no IPS match
TRUE	INTERPRO	g12482.t1		100									no IPS match	no IPS match	no IPS match
TRUE	INTERPRO	g13765.t1		100									no IPS match	no IPS match	no IPS match
TRUE	INTERPRO	g12193.t1		165									IPR023753 (PFAM)	P:GO:0055114; F:GO:0016491	P:obsolete oxidation-reduction process; F:oxidoreductase activity
TRUE	INTERPRO	g6563.t1		338									IPR001878 (PFAM); PF14223 (PFAM); IPR007671 (PFAM)	F:GO:0003676; F:GO:0008270	F:nucleic acid binding; F:zinc ion binding
TRUE	INTERPRO	g11731.t1		409									IPR032259 (PFAM); IPR019718 (PFAM)	F:GO:0003860	F:3-hydroxyisobutyryl-CoA hydrolase activity
TRUE	INTERPRO	g45683.t1		432									IPR000008 (PFAM)	F:GO:0005515	F:protein binding
TRUE	INTERPRO	g45962.t1		120									IPR025827 (PFAM); IPR020542 (PFAM); IPR003656 (PFAM)	F:GO:0003677	F:DNA binding
TRUE	INTERPRO	g26051.t1		147									no IPS match	no IPS match	no IPS match
TRUE	INTERPRO	g16798.t1		234									IPR002130 (PFAM)	P:GO:0000413; P:GO:0006457; F:GO:0003755	P:protein peptidyl-prolyl isomerization; P:protein folding; F:peptidyl-prolyl cis-trans isomerase activity
TRUE	INTERPRO	g2798.t1		156									IPR001878 (PFAM)	F:GO:0003676; F:GO:0008270	F:nucleic acid binding; F:zinc ion binding
TRUE	INTERPRO	g31727.t1		213									IPR002048 (PFAM); IPR002048 (PFAM); IPR002048 (PFAM); IPR012909 (PFAM)	F:GO:0005509	F:calcium ion binding
TRUE	INTERPRO	g43206.t1		453									IPR007236 (PFAM); IPR007656 (PFAM)	no GO terms	no GO terms
TRUE	INTERPRO	g33143.t1		282									IPR026017 (PFAM)	no GO terms	no GO terms
TRUE	INTERPRO	g11632.t1		390									IPR004333 (PFAM)	F:GO:0003677; C:GO:0005634	F:DNA binding; C:nucleus
TRUE	INTERPRO	g2379.t1		485									IPR006367 (PFAM); IPR015878 (PFAM); IPR000043 (PFAM)	P:GO:0006779; P:GO:0019354; P:GO:0019510; P:GO:0055114; F:GO:0004013; F:GO:0043115; F:GO:0051287	P:porphyrin-containing compound biosynthetic process; P:siroheme biosynthetic process; P:S-adenosylhomocysteine catabolic process; P:obsolete oxidation-reduction process; F:adenosylhomocysteinase activity; F:precorrin-2 dehydrogenase activity; F:NAD binding
TRUE	INTERPRO	g8850.t1		369									IPR000727 (PFAM)	F:GO:0005515	F:protein binding
TRUE	INTERPRO	g18966.t1		214									IPR002637 (PFAM)	F:GO:0016787	F:hydrolase activity
TRUE	INTERPRO	g32681.t1		360									IPR028939 (PFAM); IPR013154 (PFAM); IPR025874 (PFAM); IPR013149 (PFAM)	P:GO:0055114	P:obsolete oxidation-reduction process
TRUE	INTERPRO	g35164.t1		256									IPR003653 (PFAM)	P:GO:0006508; F:GO:0008234	P:proteolysis; F:cysteine-type peptidase activity
TRUE	INTERPRO	g37173.t1		504									IPR019378 (PFAM)	no GO terms	no GO terms
TRUE	INTERPRO	g32341.t1		542									IPR031522 (PFAM); IPR013212 (PFAM)	no GO terms	no GO terms
TRUE	INTERPRO	g9771.t1		216									IPR000504 (PFAM); IPR007930 (PFAM)	F:GO:0003676	F:nucleic acid binding
TRUE	INTERPRO	g26413.t1		108									no IPS match	no IPS match	no IPS match
TRUE	INTERPRO	g11378.t1		364									no IPS match	no IPS match	no IPS match
TRUE	INTERPRO	g36121.t1		219									IPR000770 (PFAM)	F:GO:0003677	F:DNA binding
TRUE	INTERPRO	g15122.t1		353									IPR022082 (PFAM)	no GO terms	no GO terms
TRUE	INTERPRO	g29487.t1		271									IPR004324 (PFAM); IPR001356 (PFAM)	P:GO:0006810; F:GO:0003677; C:GO:0016020	P:transport; F:DNA binding; C:membrane
TRUE	INTERPRO	g9954.t1		176									PF01190 (PFAM); IPR011723 (PFAM)	no GO terms	no GO terms
TRUE	INTERPRO	g10129.t1		343									IPR024312 (PFAM); IPR003106 (PFAM); IPR007060 (PFAM); IPR001356 (PFAM)	P:GO:0006355; P:GO:0007049; F:GO:0003677; F:GO:0003700; F:GO:0043565	P:regulation of DNA-templated transcription; P:cell cycle; F:DNA binding; F:DNA-binding transcription factor activity; F:sequence-specific DNA binding
TRUE	INTERPRO	g37312.t1		952									IPR029457 (PFAM); IPR006047 (PFAM); IPR024561 (PFAM); IPR004193 (PFAM)	P:GO:0005975; F:GO:0003824; F:GO:0004553	P:carbohydrate metabolic process; F:catalytic activity; F:hydrolase activity, hydrolyzing O-glycosyl compounds
TRUE	INTERPRO	g40705.t1		125									no IPS match	no IPS match	no IPS match
TRUE	INTERPRO	g31121.t1		523									IPR004333 (PFAM)	F:GO:0003677; C:GO:0005634	F:DNA binding; C:nucleus
TRUE	INTERPRO	g37516.t1		441									IPR011598 (PFAM)	F:GO:0046983	F:protein dimerization activity
TRUE	INTERPRO	g27644.t1		292									IPR000477 (PFAM)	no GO terms	no GO terms
TRUE	INTERPRO	g26803.t1		99									no IPS match	no IPS match	no IPS match
TRUE	INTERPRO	g10113.t1		224									IPR001806 (PFAM)	P:GO:0007264; F:GO:0005525	P:small GTPase-mediated signal transduction; F:GTP binding
TRUE	INTERPRO	g43362.t1		471									IPR002885 (PFAM); IPR019266 (PFAM); IPR010418 (PFAM); IPR004020 (PFAM); IPR002885 (PFAM); IPR003759 (PFAM)	no GO terms	no GO terms
TRUE	INTERPRO	g5875.t1		262									IPR001099 (PFAM); IPR002657 (PFAM)	C:GO:0016020	C:membrane
TRUE	INTERPRO	g1940.t1		310									no IPS match	no IPS match	no IPS match
TRUE	INTERPRO	g20134.t1		338									PF14223 (PFAM); IPR001878 (PFAM); IPR024675 (PFAM)	F:GO:0003676; F:GO:0008270	F:nucleic acid binding; F:zinc ion binding
TRUE	INTERPRO	g43560.t1		299									IPR005162 (PFAM)	no GO terms	no GO terms
TRUE	INTERPRO	g38397.t1		131									IPR009081 (PFAM)	no GO terms	no GO terms
TRUE	INTERPRO	g329.t1		302									IPR007303 (PFAM)	no GO terms	no GO terms
TRUE	INTERPRO	g24043.t1		399									IPR000014 (PFAM)	no GO terms	no GO terms
TRUE	INTERPRO	g17035.t1		204									IPR009910 (PFAM); IPR006501 (PFAM); IPR025397 (PFAM)	F:GO:0004857	F:enzyme inhibitor activity
TRUE	INTERPRO	g30383.t1		174									IPR000136 (PFAM); IPR027890 (PFAM)	C:GO:0012511; C:GO:0016020	C:monolayer-surrounded lipid storage body; C:membrane
TRUE	INTERPRO	g10249.t1		118									IPR033412 (PFAM)	no GO terms	no GO terms
TRUE	INTERPRO	g22653.t1		227									IPR007541 (PFAM)	no GO terms	no GO terms
TRUE	INTERPRO	g142.t1		882									IPR001245 (PFAM); IPR024788 (PFAM)	P:GO:0006468; F:GO:0004672	P:protein phosphorylation; F:protein kinase activity
TRUE	INTERPRO	g41075.t1		807									IPR006153 (PFAM); IPR003148 (PFAM)	P:GO:0006812; P:GO:0006813; P:GO:0055085; F:GO:0015299; C:GO:0016020	P:monoatomic cation transport; P:potassium ion transport; P:transmembrane transport; F:obsolete solute:proton antiporter activity; C:membrane
TRUE	INTERPRO	g35486.t1		140									PF14223 (PFAM)	no GO terms	no GO terms
TRUE	INTERPRO	g11527.t1		347									no IPS match	no IPS match	no IPS match
TRUE	INTERPRO	g27153.t1		149									no IPS match	no IPS match	no IPS match
TRUE	INTERPRO	g39889.t1		990									IPR025875 (PFAM); IPR013210 (PFAM); IPR000719 (PFAM); IPR001611 (PFAM); IPR001611 (PFAM)	P:GO:0006468; F:GO:0004672; F:GO:0005515; F:GO:0005524	P:protein phosphorylation; F:protein kinase activity; F:protein binding; F:ATP binding
TRUE	INTERPRO	g39243.t1		348									no IPS match	no IPS match	no IPS match
TRUE	INTERPRO	g28067.t1		1171									IPR031852 (PFAM); PF16638 (PFAM); IPR001752 (PFAM)	P:GO:0007018; F:GO:0003777; F:GO:0005524; F:GO:0008017	P:microtubule-based movement; F:microtubule motor activity; F:ATP binding; F:microtubule binding
TRUE	INTERPRO	g19638.t1		1248									IPR002611 (PFAM); PF13479 (PFAM); IPR003593 (PFAM); PF13173 (PFAM); IPR003959 (PFAM); IPR000253 (PFAM); PF13191 (PFAM)	F:GO:0005515; F:GO:0005524	F:protein binding; F:ATP binding
TRUE	INTERPRO	g3.t1		467									PF00009 (PFAM); IPR004161 (PFAM); IPR031662 (PFAM); IPR015256 (PFAM)	F:GO:0005525	F:GTP binding
TRUE	INTERPRO	g29859.t1		1001									IPR000811 (PFAM)	P:GO:0005975; F:GO:0008184	P:carbohydrate metabolic process; F:glycogen phosphorylase activity
TRUE	INTERPRO	g31491.t1		164									IPR001854 (PFAM)	P:GO:0006412; F:GO:0003735; C:GO:0005622; C:GO:0005840	P:translation; F:structural constituent of ribosome; C:intracellular anatomical structure; C:ribosome
TRUE	INTERPRO	g38959.t1		193									IPR033389 (PFAM)	no GO terms	no GO terms
TRUE	INTERPRO	g24055.t1		136									IPR013766 (PFAM); IPR002109 (PFAM); IPR012336 (PFAM)	P:GO:0045454; F:GO:0009055; F:GO:0015035	P:cell redox homeostasis; F:electron transfer activity; F:protein-disulfide reductase activity
TRUE	INTERPRO	g34941.t1		257									PF13740 (PFAM); IPR011598 (PFAM)	F:GO:0046983	F:protein dimerization activity
TRUE	INTERPRO	g33042.t1		472									IPR019585 (PFAM); IPR032867 (PFAM); IPR002885 (PFAM); IPR002885 (PFAM); IPR002885 (PFAM)	F:GO:0008270	F:zinc ion binding
TRUE	INTERPRO	g25196.t1		107									IPR003340 (PFAM)	F:GO:0003677	F:DNA binding
TRUE	INTERPRO	g3127.t1		539									IPR000070 (PFAM); IPR031537 (PFAM); IPR006501 (PFAM)	P:GO:0042545; F:GO:0004857; F:GO:0030599; C:GO:0005618	P:cell wall modification; F:enzyme inhibitor activity; F:pectinesterase activity; C:cell wall
TRUE	INTERPRO	g22089.t1		151									IPR019339 (PFAM); IPR025332 (PFAM)	no GO terms	no GO terms
TRUE	INTERPRO	g26719.t1		318									no IPS match	no IPS match	no IPS match
TRUE	INTERPRO	g36844.t1		288									IPR002885 (PFAM); IPR002885 (PFAM); IPR002885 (PFAM); IPR019734 (PFAM); PF13428 (PFAM); IPR004020 (PFAM)	F:GO:0005515	F:protein binding
TRUE	INTERPRO	g26454.t1		388									PF01564 (PFAM)	no GO terms	no GO terms
TRUE	INTERPRO	g26455.t1		388									PF01564 (PFAM)	no GO terms	no GO terms
TRUE	INTERPRO	g26453.t1		388									PF01564 (PFAM)	no GO terms	no GO terms
TRUE	INTERPRO	g20159.t1		253									IPR013117 (PFAM)	no GO terms	no GO terms
TRUE	INTERPRO	g16382.t1		647									IPR019050 (PFAM); IPR025609 (PFAM)	no GO terms	no GO terms
TRUE	INTERPRO	g375.t1		155									IPR006121 (PFAM)	P:GO:0030001; F:GO:0046872	P:metal ion transport; F:metal ion binding
TRUE	INTERPRO	g5347.t1		377									IPR004000 (PFAM)	no GO terms	no GO terms
TRUE	INTERPRO	g26294.t1		137									IPR028262 (PFAM); IPR002068 (PFAM)	P:GO:0000723	P:telomere maintenance
TRUE	INTERPRO	g42673.t1		779									IPR015800 (PFAM); IPR015802 (PFAM); IPR015798 (PFAM)	P:GO:0009308; P:GO:0055114; F:GO:0005507; F:GO:0008131; F:GO:0048038	P:amine metabolic process; P:obsolete oxidation-reduction process; F:copper ion binding; F:primary methylamine oxidase activity; F:quinone binding
TRUE	INTERPRO	g13984.t1		115									no IPS match	no IPS match	no IPS match
TRUE	INTERPRO	g22360.t1		483									IPR001680 (PFAM)	F:GO:0005515	F:protein binding
TRUE	INTERPRO	g42869.t1		543									IPR002048 (PFAM); IPR000261 (PFAM); PF13479 (PFAM); IPR031692 (PFAM); IPR022812 (PFAM)	F:GO:0005509; F:GO:0005515	F:calcium ion binding; F:protein binding
TRUE	INTERPRO	g43863.t1		231									IPR012173 (PFAM); IPR011687 (PFAM)	P:GO:0006364; C:GO:0005634; C:GO:0005732; C:GO:0034457	P:rRNA processing; C:nucleus; C:sno(s)RNA-containing ribonucleoprotein complex; C:Mpp10 complex
TRUE	INTERPRO	g35475.t1		274									no IPS match	no IPS match	no IPS match
TRUE	INTERPRO	g9607.t1		113									no IPS match	no IPS match	no IPS match
TRUE	INTERPRO	g2216.t1		482									PF13238 (PFAM); IPR011545 (PFAM); IPR027911 (PFAM); IPR003959 (PFAM); PF03215 (PFAM)	F:GO:0003676; F:GO:0005524	F:nucleic acid binding; F:ATP binding
TRUE	INTERPRO	g33442.t1		1172									IPR025724 (PFAM); IPR001584 (PFAM); IPR013103 (PFAM)	P:GO:0015074	P:DNA integration
TRUE	INTERPRO	g10716.t1		105									no IPS match	no IPS match	no IPS match
TRUE	INTERPRO	g1754.t1		1127									IPR004098 (PFAM); IPR001680 (PFAM); IPR024298 (PFAM); IPR024977 (PFAM); IPR009917 (PFAM)	P:GO:0008380; F:GO:0005515; C:GO:0005681	P:RNA splicing; F:protein binding; C:spliceosomal complex
TRUE	INTERPRO	g1114.t1		112									IPR019083 (PFAM); IPR001660 (PFAM)	F:GO:0005515	F:protein binding
TRUE	INTERPRO	g23988.t1		585									PF14223 (PFAM); IPR032486 (PFAM); IPR018757 (PFAM); IPR025314 (PFAM); IPR003106 (PFAM); IPR001878 (PFAM)	P:GO:0006355; F:GO:0003676; F:GO:0003700; F:GO:0008270; F:GO:0043565	P:regulation of DNA-templated transcription; F:nucleic acid binding; F:DNA-binding transcription factor activity; F:zinc ion binding; F:sequence-specific DNA binding
TRUE	INTERPRO	g44185.t1		988									IPR032474 (PFAM); IPR014811 (PFAM); IPR032472 (PFAM); IPR003165 (PFAM); IPR003100 (PFAM); IPR021960 (PFAM); IPR032473 (PFAM)	F:GO:0003676; F:GO:0005515	F:nucleic acid binding; F:protein binding
TRUE	INTERPRO	g12543.t1		430									PF14223 (PFAM); IPR001878 (PFAM); IPR007175 (PFAM); IPR025314 (PFAM)	F:GO:0003676; F:GO:0008270	F:nucleic acid binding; F:zinc ion binding
TRUE	INTERPRO	g1792.t1		777									IPR011545 (PFAM); IPR001650 (PFAM); IPR007874 (PFAM)	P:GO:0051302; F:GO:0003676; F:GO:0005524	P:regulation of cell division; F:nucleic acid binding; F:ATP binding
TRUE	INTERPRO	g31846.t1		352									no IPS match	no IPS match	no IPS match
TRUE	INTERPRO	g26838.t1		338									IPR007671 (PFAM); PF14223 (PFAM); IPR001878 (PFAM)	F:GO:0003676; F:GO:0008270	F:nucleic acid binding; F:zinc ion binding
TRUE	INTERPRO	g25244.t1		215									IPR005301 (PFAM)	no GO terms	no GO terms
TRUE	INTERPRO	g3194.t1		1212									IPR003439 (PFAM); IPR011545 (PFAM); IPR007502 (PFAM); IPR003959 (PFAM); IPR003029 (PFAM); IPR011709 (PFAM); IPR001650 (PFAM)	F:GO:0003676; F:GO:0004386; F:GO:0005524; F:GO:0016887	F:nucleic acid binding; F:helicase activity; F:ATP binding; F:ATP hydrolysis activity
TRUE	INTERPRO	g23454.t1		228									IPR003428 (PFAM)	C:GO:0005759	C:mitochondrial matrix
TRUE	INTERPRO	g12973.t1		488									IPR001701 (PFAM)	P:GO:0005975; F:GO:0004553	P:carbohydrate metabolic process; F:hydrolase activity, hydrolyzing O-glycosyl compounds
TRUE	INTERPRO	g32329.t1		297									IPR031814 (PFAM)	no GO terms	no GO terms
TRUE	INTERPRO	g40747.t1		184									IPR005162 (PFAM); IPR024574 (PFAM)	no GO terms	no GO terms
TRUE	INTERPRO	g16668.t1		177									IPR001878 (PFAM)	F:GO:0003676; F:GO:0008270	F:nucleic acid binding; F:zinc ion binding
TRUE	INTERPRO	g31397.t1		276									IPR004853 (PFAM)	no GO terms	no GO terms
TRUE	INTERPRO	g12585.t1		100									no IPS match	no IPS match	no IPS match
TRUE	INTERPRO	g8383.t1		299									IPR008217 (PFAM); IPR011732 (PFAM)	no GO terms	no GO terms
TRUE	INTERPRO	g42160.t1		341									IPR001878 (PFAM); PF14223 (PFAM)	F:GO:0003676; F:GO:0008270	F:nucleic acid binding; F:zinc ion binding
TRUE	INTERPRO	g665.t1		431									IPR032486 (PFAM); PF14223 (PFAM); IPR025314 (PFAM); IPR018757 (PFAM); IPR001878 (PFAM)	F:GO:0003676; F:GO:0008270	F:nucleic acid binding; F:zinc ion binding
TRUE	INTERPRO	g4256.t1		555									IPR004294 (PFAM)	P:GO:0055114; F:GO:0016702	P:obsolete oxidation-reduction process; F:oxidoreductase activity, acting on single donors with incorporation of molecular oxygen, incorporation of two atoms of oxygen
TRUE	INTERPRO	g38124.t1		276									PF14223 (PFAM); IPR001878 (PFAM)	F:GO:0003676; F:GO:0008270	F:nucleic acid binding; F:zinc ion binding
TRUE	INTERPRO	g2537.t1		101									IPR003213 (PFAM); IPR003515 (PFAM)	P:GO:0019048; F:GO:0004129; C:GO:0005739	P:modulation by virus of host process; F:cytochrome-c oxidase activity; C:mitochondrion
TRUE	INTERPRO	g8085.t1		118									no IPS match	no IPS match	no IPS match
TRUE	INTERPRO	g3794.t1		108									no IPS match	no IPS match	no IPS match
TRUE	INTERPRO	g12113.t1		193									IPR025314 (PFAM); PF14223 (PFAM)	no GO terms	no GO terms
TRUE	INTERPRO	g41871.t1		431									IPR000719 (PFAM)	P:GO:0006468; F:GO:0004672; F:GO:0005524	P:protein phosphorylation; F:protein kinase activity; F:ATP binding
TRUE	INTERPRO	g26331.t1		1325									PF14223 (PFAM); IPR001584 (PFAM); IPR001878 (PFAM); IPR025724 (PFAM); IPR013103 (PFAM)	P:GO:0015074; F:GO:0003676; F:GO:0008270	P:DNA integration; F:nucleic acid binding; F:zinc ion binding
TRUE	INTERPRO	g5081.t1		569									IPR001606 (PFAM); IPR002068 (PFAM)	F:GO:0003677	F:DNA binding
TRUE	INTERPRO	g34133.t1		367									IPR001810 (PFAM); IPR013694 (PFAM); IPR021672 (PFAM); IPR013101 (PFAM)	F:GO:0005515	F:protein binding
TRUE	INTERPRO	g37355.t1		688									IPR022754 (PFAM); IPR002885 (PFAM); IPR001440 (PFAM); IPR033443 (PFAM); IPR010418 (PFAM); IPR021679 (PFAM); IPR002885 (PFAM); IPR002885 (PFAM)	F:GO:0003887; F:GO:0005515	F:DNA-directed DNA polymerase activity; F:protein binding
TRUE	INTERPRO	g14719.t1		436									IPR004205 (PFAM); IPR018108 (PFAM)	F:GO:0008121	F:ubiquinol-cytochrome-c reductase activity
TRUE	INTERPRO	g7303.t1		304									IPR002524 (PFAM); IPR008384 (PFAM); IPR027470 (PFAM)	P:GO:0006812; P:GO:0030041; P:GO:0034314; P:GO:0055085; F:GO:0008324; C:GO:0005885; C:GO:0015629; C:GO:0016020	P:monoatomic cation transport; P:actin filament polymerization; P:Arp2/3 complex-mediated actin nucleation; P:transmembrane transport; F:monoatomic cation transmembrane transporter activity; C:Arp2/3 protein complex; C:actin cytoskeleton; C:membrane
TRUE	INTERPRO	g24148.t1		345									IPR031838 (PFAM); IPR013217 (PFAM); PF01564 (PFAM); IPR006652 (PFAM)	F:GO:0005515	F:protein binding
TRUE	INTERPRO	g2402.t1		765									IPR025836 (PFAM); IPR025558 (PFAM); IPR022649 (PFAM)	P:GO:0006275; F:GO:0003677	P:regulation of DNA replication; F:DNA binding
TRUE	INTERPRO	g33682.t1		111									IPR013920 (PFAM); IPR000620 (PFAM)	C:GO:0016020; C:GO:0016020	C:membrane; C:membrane
TRUE	INTERPRO	g22888.t1		111									IPR013920 (PFAM); IPR000620 (PFAM)	C:GO:0016020; C:GO:0016020	C:membrane; C:membrane
TRUE	INTERPRO	g15444.t1		133									IPR007125 (PFAM); IPR032454 (PFAM)	F:GO:0003677	F:DNA binding
TRUE	INTERPRO	g17348.t1		546									IPR005199 (PFAM)	F:GO:0016798; C:GO:0016020	F:hydrolase activity, acting on glycosyl bonds; C:membrane
TRUE	INTERPRO	g7914.t1		107									IPR013103 (PFAM)	no GO terms	no GO terms
TRUE	INTERPRO	g8604.t1		352									IPR013094 (PFAM)	P:GO:0008152; F:GO:0016787	P:metabolic process; F:hydrolase activity
TRUE	INTERPRO	g39552.t1		351									no IPS match	no IPS match	no IPS match
TRUE	INTERPRO	g24582.t1		531									IPR019378 (PFAM); PF13717 (PFAM)	no GO terms	no GO terms
TRUE	INTERPRO	g22660.t1		205									IPR008906 (PFAM)	F:GO:0046983	F:protein dimerization activity
TRUE	INTERPRO	g34805.t1		787									IPR001584 (PFAM); IPR013103 (PFAM)	P:GO:0015074	P:DNA integration
TRUE	INTERPRO	g33322.t1		86									IPR022251 (PFAM)	no GO terms	no GO terms
TRUE	INTERPRO	g33321.t1		86									IPR022251 (PFAM)	no GO terms	no GO terms
TRUE	INTERPRO	g6858.t1		170									IPR003656 (PFAM)	F:GO:0003677	F:DNA binding
TRUE	INTERPRO	g9303.t1		92									IPR021899 (PFAM)	no GO terms	no GO terms
TRUE	INTERPRO	g37065.t1		167									IPR014878 (PFAM)	no GO terms	no GO terms
TRUE	INTERPRO	g18956.t2		320									IPR011598 (PFAM); IPR003742 (PFAM)	P:GO:0006364; F:GO:0008168; F:GO:0046983; C:GO:0005737	P:rRNA processing; F:methyltransferase activity; F:protein dimerization activity; C:cytoplasm
TRUE	INTERPRO	g45676.t1		317									IPR027470 (PFAM); IPR002524 (PFAM)	P:GO:0006812; P:GO:0055085; F:GO:0008324; C:GO:0016020	P:monoatomic cation transport; P:transmembrane transport; F:monoatomic cation transmembrane transporter activity; C:membrane
TRUE	INTERPRO	g9396.t1		571									IPR013766 (PFAM); PF13848 (PFAM)	P:GO:0045454	P:cell redox homeostasis
TRUE	INTERPRO	g40751.t1		135									no IPS match	no IPS match	no IPS match
TRUE	INTERPRO	g35824.t1		306									PF13561 (PFAM); IPR017395 (PFAM); IPR017395 (PFAM)	P:GO:0015996; F:GO:0047746	P:chlorophyll catabolic process; F:chlorophyllase activity
TRUE	INTERPRO	g45948.t1		169									no IPS match	no IPS match	no IPS match
TRUE	INTERPRO	g20561.t1		289									IPR002472 (PFAM)	F:GO:0098599	F:palmitoyl hydrolase activity
TRUE	INTERPRO	g6533.t1		427									IPR002088 (PFAM)	P:GO:0018342; F:GO:0008318	P:protein prenylation; F:protein prenyltransferase activity
TRUE	INTERPRO	g20217.t1		108									no IPS match	no IPS match	no IPS match
TRUE	INTERPRO	g40614.t1		409									IPR002083 (PFAM); IPR011705 (PFAM); IPR000210 (PFAM)	F:GO:0005515	F:protein binding
TRUE	INTERPRO	g38673.t1		112									PF00428 (PFAM)	no GO terms	no GO terms
TRUE	INTERPRO	g29096.t1		114									IPR019434 (PFAM)	no GO terms	no GO terms
TRUE	INTERPRO	g24844.t1		576									IPR002048 (PFAM); IPR023753 (PFAM)	P:GO:0055114; F:GO:0005509; F:GO:0016491	P:obsolete oxidation-reduction process; F:calcium ion binding; F:oxidoreductase activity
TRUE	INTERPRO	g43860.t1		436									IPR003480 (PFAM)	F:GO:0016747	F:acyltransferase activity, transferring groups other than amino-acyl groups
TRUE	INTERPRO	g17597.t1		206									IPR019759 (PFAM)	no GO terms	no GO terms
TRUE	INTERPRO	g39215.t1		206									IPR019759 (PFAM)	no GO terms	no GO terms
TRUE	INTERPRO	g33028.t1		573									IPR001251 (PFAM); IPR011074 (PFAM)	no GO terms	no GO terms
TRUE	INTERPRO	g7366.t1		1164									IPR001584 (PFAM); IPR025724 (PFAM); IPR013103 (PFAM)	P:GO:0015074	P:DNA integration
TRUE	INTERPRO	g33880.t1		171									IPR007527 (PFAM)	F:GO:0008270	F:zinc ion binding
TRUE	INTERPRO	g41115.t1		356									IPR012442 (PFAM)	no GO terms	no GO terms
TRUE	INTERPRO	g24841.t1		383									IPR007197 (PFAM); IPR031691 (PFAM); IPR008566 (PFAM)	F:GO:0003824; F:GO:0051536	F:catalytic activity; F:iron-sulfur cluster binding
TRUE	INTERPRO	g41058.t1		364									no IPS match	no IPS match	no IPS match
TRUE	INTERPRO	g9039.t1		501									IPR004330 (PFAM); IPR003657 (PFAM)	P:GO:0006355; F:GO:0003700; F:GO:0043565	P:regulation of DNA-templated transcription; F:DNA-binding transcription factor activity; F:sequence-specific DNA binding
TRUE	INTERPRO	g36273.t1		108									no IPS match	no IPS match	no IPS match
TRUE	INTERPRO	g22219.t1		311									IPR000477 (PFAM)	no GO terms	no GO terms
TRUE	INTERPRO	g36909.t1		550									IPR001878 (PFAM); IPR025314 (PFAM); IPR001878 (PFAM); IPR010377 (PFAM); PF14223 (PFAM)	P:GO:0006260; F:GO:0003676; F:GO:0008270	P:DNA replication; F:nucleic acid binding; F:zinc ion binding
TRUE	INTERPRO	g38971.t1		522									IPR002921 (PFAM)	P:GO:0006629	P:lipid metabolic process
TRUE	INTERPRO	g16570.t1		351									no IPS match	no IPS match	no IPS match
TRUE	INTERPRO	g24261.t1		445									IPR001878 (PFAM); IPR025314 (PFAM); PF14223 (PFAM)	F:GO:0003676; F:GO:0008270	F:nucleic acid binding; F:zinc ion binding
TRUE	INTERPRO	g29323.t1		342									PF14223 (PFAM); IPR001878 (PFAM)	F:GO:0003676; F:GO:0008270	F:nucleic acid binding; F:zinc ion binding
TRUE	INTERPRO	g31618.t1		661									IPR012945 (PFAM); IPR001220 (PFAM); IPR000719 (PFAM)	P:GO:0006468; F:GO:0004672; F:GO:0005524; F:GO:0030246	P:protein phosphorylation; F:protein kinase activity; F:ATP binding; F:carbohydrate binding
TRUE	INTERPRO	g30636.t1		416									IPR000477 (PFAM)	no GO terms	no GO terms
TRUE	INTERPRO	g1898.t1		1165									IPR025724 (PFAM); IPR001584 (PFAM); IPR013103 (PFAM)	P:GO:0015074	P:DNA integration
TRUE	INTERPRO	g5325.t1		311									IPR001005 (PFAM)	no GO terms	no GO terms
TRUE	INTERPRO	g13636.t1		281									no IPS match	no IPS match	no IPS match
TRUE	INTERPRO	g24577.t1		180									IPR018924 (PFAM); IPR003213 (PFAM)	F:GO:0004129; C:GO:0005739	F:cytochrome-c oxidase activity; C:mitochondrion
TRUE	INTERPRO	g12753.t1		164									IPR033753 (PFAM)	no GO terms	no GO terms
TRUE	INTERPRO	g9262.t1		360									IPR013078 (PFAM)	no GO terms	no GO terms
TRUE	INTERPRO	g28977.t1		144									IPR001087 (PFAM)	F:GO:0016788	F:hydrolase activity, acting on ester bonds
TRUE	INTERPRO	g21989.t1		1325									IPR001878 (PFAM); IPR013103 (PFAM); IPR001444 (PFAM); IPR025724 (PFAM); PF14223 (PFAM); IPR001584 (PFAM)	P:GO:0015074; P:GO:0071973; F:GO:0003676; F:GO:0008270	P:DNA integration; P:bacterial-type flagellum-dependent cell motility; F:nucleic acid binding; F:zinc ion binding
TRUE	INTERPRO	g20437.t1		1325									IPR001878 (PFAM); IPR013103 (PFAM); IPR001444 (PFAM); IPR025724 (PFAM); PF14223 (PFAM); IPR001584 (PFAM)	P:GO:0015074; P:GO:0071973; F:GO:0003676; F:GO:0008270	P:DNA integration; P:bacterial-type flagellum-dependent cell motility; F:nucleic acid binding; F:zinc ion binding
TRUE	INTERPRO	g40357.t1		422									IPR004963 (PFAM); IPR004031 (PFAM)	F:GO:0016787; C:GO:0016020	F:hydrolase activity; C:membrane
TRUE	INTERPRO	g34432.t1		547									IPR002912 (PFAM); IPR001245 (PFAM)	P:GO:0006468; P:GO:0008152; F:GO:0004672; F:GO:0016597	P:protein phosphorylation; P:metabolic process; F:protein kinase activity; F:amino acid binding
TRUE	INTERPRO	g9016.t1		193									IPR019787 (PFAM); PF14447 (PFAM); IPR001841 (PFAM)	F:GO:0005515; F:GO:0008270	F:protein binding; F:zinc ion binding
TRUE	INTERPRO	g39680.t1		778									IPR003656 (PFAM); IPR007021 (PFAM); IPR008906 (PFAM); IPR025525 (PFAM)	F:GO:0003677; F:GO:0046983	F:DNA binding; F:protein dimerization activity
TRUE	INTERPRO	g42064.t1		413									IPR004821 (PFAM); IPR004308 (PFAM)	P:GO:0006750; P:GO:0009058; F:GO:0003824; F:GO:0004357	P:glutathione biosynthetic process; P:biosynthetic process; F:catalytic activity; F:glutamate-cysteine ligase activity
TRUE	INTERPRO	g31621.t1		445									IPR005135 (PFAM); IPR002048 (PFAM)	F:GO:0005509	F:calcium ion binding
TRUE	INTERPRO	g24051.t1		538									IPR018757 (PFAM); IPR001878 (PFAM); IPR001878 (PFAM); PF14223 (PFAM)	F:GO:0003676; F:GO:0008270	F:nucleic acid binding; F:zinc ion binding
TRUE	INTERPRO	g30740.t1		454									IPR006083 (PFAM)	P:GO:0008152; F:GO:0005524; F:GO:0016301	P:metabolic process; F:ATP binding; F:kinase activity
TRUE	INTERPRO	g7871.t1		556									PF14223 (PFAM); IPR001878 (PFAM); IPR025314 (PFAM)	F:GO:0003676; F:GO:0008270	F:nucleic acid binding; F:zinc ion binding
TRUE	INTERPRO	g8571.t1		511									IPR008758 (PFAM)	P:GO:0006508; F:GO:0008236	P:proteolysis; F:serine-type peptidase activity
TRUE	INTERPRO	g29729.t1		470									IPR004274 (PFAM)	no GO terms	no GO terms
TRUE	INTERPRO	g31651.t1		134									IPR001199 (PFAM)	no GO terms	no GO terms
TRUE	INTERPRO	g21523.t1		449									IPR002912 (PFAM)	P:GO:0008152; F:GO:0016597	P:metabolic process; F:amino acid binding
TRUE	INTERPRO	g3197.t1		373									IPR018588 (PFAM); IPR005607 (PFAM); IPR005632 (PFAM); IPR002164 (PFAM); IPR008845 (PFAM); IPR007015 (PFAM); IPR021110 (PFAM)	P:GO:0006334; P:GO:0006351; F:GO:0003677; F:GO:0003887; F:GO:0051082; C:GO:0005634	P:nucleosome assembly; P:DNA-templated transcription; F:DNA binding; F:DNA-directed DNA polymerase activity; F:unfolded protein binding; C:nucleus
TRUE	INTERPRO	g28713.t2		395									IPR000504 (PFAM); IPR000504 (PFAM)	F:GO:0003676	F:nucleic acid binding
TRUE	INTERPRO	g8694.t1		352									no IPS match	no IPS match	no IPS match
TRUE	INTERPRO	g19024.t1		339									IPR001878 (PFAM); PF14223 (PFAM)	F:GO:0003676; F:GO:0008270	F:nucleic acid binding; F:zinc ion binding
TRUE	INTERPRO	g21237.t1		181									IPR009810 (PFAM); IPR004231 (PFAM); IPR009009 (PFAM)	P:GO:0009877; F:GO:0046872	P:nodulation; F:metal ion binding
TRUE	INTERPRO	g25319.t1		269									IPR018499 (PFAM); IPR007436 (PFAM); IPR018702 (PFAM); IPR009261 (PFAM); IPR021792 (PFAM); IPR026961 (PFAM)	F:GO:0004564; F:GO:0004575; C:GO:0016020	F:beta-fructofuranosidase activity; F:sucrose alpha-glucosidase activity; C:membrane
TRUE	INTERPRO	g7500.t1		1376									IPR001878 (PFAM); IPR013103 (PFAM); PF14223 (PFAM); IPR025724 (PFAM); IPR001584 (PFAM); IPR001584 (PFAM)	P:GO:0015074; F:GO:0003676; F:GO:0008270	P:DNA integration; F:nucleic acid binding; F:zinc ion binding
TRUE	INTERPRO	g32265.t1		364									IPR001878 (PFAM); IPR007060 (PFAM); IPR005162 (PFAM)	P:GO:0007049; F:GO:0003676; F:GO:0008270	P:cell cycle; F:nucleic acid binding; F:zinc ion binding
TRUE	INTERPRO	g5770.t1		519									IPR000571 (PFAM)	F:GO:0046872	F:metal ion binding
TRUE	INTERPRO	g17816.t1		240									PF14223 (PFAM); IPR029472 (PFAM)	no GO terms	no GO terms
TRUE	INTERPRO	g24410.t1		197									IPR007285 (PFAM); IPR016030 (PFAM)	no GO terms	no GO terms
TRUE	INTERPRO	g17135.t2		365									IPR003323 (PFAM); IPR000843 (PFAM)	P:GO:0006355; F:GO:0003677	P:regulation of DNA-templated transcription; F:DNA binding
TRUE	INTERPRO	g35.t1		218									IPR002100 (PFAM)	F:GO:0003677; F:GO:0046983	F:DNA binding; F:protein dimerization activity
TRUE	INTERPRO	g29099.t1		152									IPR002222 (PFAM)	P:GO:0006412; F:GO:0003735; C:GO:0005840	P:translation; F:structural constituent of ribosome; C:ribosome
TRUE	INTERPRO	g15876.t1		152									IPR002222 (PFAM)	P:GO:0006412; F:GO:0003735; C:GO:0005840	P:translation; F:structural constituent of ribosome; C:ribosome
TRUE	INTERPRO	g13085.t1		261									IPR001841 (PFAM)	F:GO:0005515; F:GO:0008270	F:protein binding; F:zinc ion binding
TRUE	INTERPRO	g18591.t1		222									no IPS match	no IPS match	no IPS match
TRUE	INTERPRO	g31678.t1		436									PF14223 (PFAM); IPR025314 (PFAM); IPR001878 (PFAM); PF08700 (PFAM); IPR028933 (PFAM)	F:GO:0003676; F:GO:0008270	F:nucleic acid binding; F:zinc ion binding
TRUE	INTERPRO	g40283.t1		87									IPR020829 (PFAM)	P:GO:0055114; F:GO:0016620	P:obsolete oxidation-reduction process; F:oxidoreductase activity, acting on the aldehyde or oxo group of donors, NAD or NADP as acceptor
TRUE	INTERPRO	g24264.t2		414									IPR023631 (PFAM)	no GO terms	no GO terms
TRUE	INTERPRO	g5807.t1		270									IPR000782 (PFAM)	no GO terms	no GO terms
TRUE	INTERPRO	g1425.t1		302									IPR006766 (PFAM)	no GO terms	no GO terms
TRUE	INTERPRO	g18097.t1		796									IPR025486 (PFAM); IPR022212 (PFAM)	no GO terms	no GO terms
TRUE	INTERPRO	g32835.t1		242									IPR025745 (PFAM); IPR009292 (PFAM)	P:GO:0000469	P:obsolete cleavage involved in rRNA processing
TRUE	INTERPRO	g6413.t1		1165									IPR025724 (PFAM); IPR001584 (PFAM); IPR013103 (PFAM)	P:GO:0015074	P:DNA integration
TRUE	INTERPRO	g45712.t1		343									no IPS match	no IPS match	no IPS match
TRUE	INTERPRO	g8252.t1		331									IPR000070 (PFAM); IPR025223 (PFAM)	P:GO:0042545; F:GO:0030599; C:GO:0005618	P:cell wall modification; F:pectinesterase activity; C:cell wall
TRUE	INTERPRO	g33546.t1		248									IPR001938 (PFAM)	no GO terms	no GO terms
TRUE	INTERPRO	g26022.t1		423									PF13424 (PFAM); PF13428 (PFAM); IPR011717 (PFAM); PF13432 (PFAM); IPR018704 (PFAM); IPR019734 (PFAM)	F:GO:0005515; F:GO:0042802	F:protein binding; F:identical protein binding
TRUE	INTERPRO	g14898.t1		806									IPR024599 (PFAM); IPR001584 (PFAM); IPR013103 (PFAM)	P:GO:0015074	P:DNA integration
TRUE	INTERPRO	g8110.t1		59									no IPS match	no IPS match	no IPS match
TRUE	INTERPRO	g21484.t1		1162									IPR013103 (PFAM); IPR001584 (PFAM); IPR029472 (PFAM); PF14223 (PFAM); IPR025724 (PFAM)	P:GO:0015074	P:DNA integration
TRUE	INTERPRO	g30673.t1		338									PF14223 (PFAM); IPR001878 (PFAM)	F:GO:0003676; F:GO:0008270	F:nucleic acid binding; F:zinc ion binding
TRUE	INTERPRO	g43956.t1		112									IPR001576 (PFAM)	P:GO:0006096; F:GO:0004618	P:glycolytic process; F:phosphoglycerate kinase activity
TRUE	INTERPRO	g32311.t1		131									IPR014866 (PFAM)	no GO terms	no GO terms
TRUE	INTERPRO	g13897.t1		437									IPR004140 (PFAM); IPR007265 (PFAM); IPR024623 (PFAM)	P:GO:0006886; P:GO:0006887; C:GO:0000145; C:GO:0005801; C:GO:0016020	P:intracellular protein transport; P:exocytosis; C:exocyst; C:cis-Golgi network; C:membrane
TRUE	INTERPRO	g38288.t1		317									IPR000727 (PFAM); IPR019529 (PFAM)	F:GO:0005515	F:protein binding
TRUE	INTERPRO	g29134.t1		473									IPR025953 (PFAM); PF13424 (PFAM); IPR007330 (PFAM); IPR019734 (PFAM); IPR004127 (PFAM); IPR008905 (PFAM); IPR012926 (PFAM)	P:GO:0006413; F:GO:0003743; F:GO:0005515; F:GO:0031369; C:GO:0005852; C:GO:0016020	P:translational initiation; F:translation initiation factor activity; F:protein binding; F:translation initiation factor binding; C:eukaryotic translation initiation factor 3 complex; C:membrane
TRUE	INTERPRO	g23511.t1		351									no IPS match	no IPS match	no IPS match
TRUE	INTERPRO	g39964.t1		1170									IPR025724 (PFAM); IPR013103 (PFAM); IPR001584 (PFAM)	P:GO:0015074	P:DNA integration
TRUE	INTERPRO	g15208.t1		341									IPR023214 (PFAM); IPR027706 (PFAM)	no GO terms	no GO terms
TRUE	INTERPRO	g23730.t1		574									IPR015793 (PFAM); IPR015795 (PFAM)	P:GO:0006096; F:GO:0000287; F:GO:0004743; F:GO:0030955	P:glycolytic process; F:magnesium ion binding; F:pyruvate kinase activity; F:potassium ion binding
TRUE	INTERPRO	g39296.t1		268									no IPS match	no IPS match	no IPS match
TRUE	INTERPRO	g12177.t1		424									IPR005539 (PFAM); IPR005541 (PFAM); IPR005540 (PFAM); IPR008422 (PFAM); IPR001356 (PFAM)	P:GO:0006355; F:GO:0003677; C:GO:0005634	P:regulation of DNA-templated transcription; F:DNA binding; C:nucleus
TRUE	INTERPRO	g31332.t1		204									IPR027829 (PFAM); IPR018466 (PFAM); IPR016605 (PFAM)	P:GO:0010167; P:GO:0015706	P:response to nitrate; P:nitrate transmembrane transport
TRUE	INTERPRO	g3746.t1		393									IPR033391 (PFAM)	no GO terms	no GO terms
TRUE	INTERPRO	g7634.t1		375									IPR024962 (PFAM); IPR026896 (PFAM); IPR000626 (PFAM); IPR001611 (PFAM)	P:GO:0031124; F:GO:0005515	P:mRNA 3'-end processing; F:protein binding
TRUE	INTERPRO	g15200.t1		292									IPR025868 (PFAM)	no GO terms	no GO terms
TRUE	INTERPRO	g1472.t1		100									IPR009708 (PFAM); IPR007077 (PFAM)	no GO terms	no GO terms
TRUE	INTERPRO	g17629.t1		810									IPR008847 (PFAM); IPR013633 (PFAM); IPR019734 (PFAM); PF13424 (PFAM); IPR011990 (PFAM); PF14559 (PFAM); IPR019734 (PFAM)	P:GO:0006397; F:GO:0005515; C:GO:0005634	P:mRNA processing; F:protein binding; C:nucleus
TRUE	INTERPRO	g27734.t1		470									IPR016033 (PFAM); IPR006960 (PFAM); IPR007529 (PFAM)	no GO terms	no GO terms
TRUE	INTERPRO	g37383.t1		217									IPR001328 (PFAM)	F:GO:0004045	F:aminoacyl-tRNA hydrolase activity
TRUE	INTERPRO	g32444.t1		109									IPR032147 (PFAM); IPR033412 (PFAM)	no GO terms	no GO terms
TRUE	INTERPRO	g28065.t1		811									IPR010472 (PFAM); IPR001404 (PFAM); IPR003594 (PFAM)	P:GO:0006457; P:GO:0006950; P:GO:0016043; F:GO:0003779; F:GO:0005524; F:GO:0051082	P:protein folding; P:response to stress; P:cellular component organization; F:actin binding; F:ATP binding; F:unfolded protein binding
TRUE	INTERPRO	g1256.t1		666									IPR012001 (PFAM); IPR011766 (PFAM); IPR007054 (PFAM); IPR012000 (PFAM)	F:GO:0000287; F:GO:0003824; F:GO:0030976	F:magnesium ion binding; F:catalytic activity; F:thiamine pyrophosphate binding
TRUE	INTERPRO	g4800.t1		132									IPR024489 (PFAM)	no GO terms	no GO terms
TRUE	INTERPRO	g35909.t1		507									IPR002885 (PFAM); IPR002885 (PFAM); IPR033443 (PFAM)	no GO terms	no GO terms
TRUE	INTERPRO	g16558.t1		879									IPR002885 (PFAM); PF14689 (PFAM); IPR024319 (PFAM); IPR002885 (PFAM); IPR002885 (PFAM); IPR001440 (PFAM); IPR031467 (PFAM); IPR032867 (PFAM)	P:GO:0006417; F:GO:0005515; F:GO:0008270; F:GO:0045182	P:regulation of translation; F:protein binding; F:zinc ion binding; F:translation regulator activity
TRUE	INTERPRO	g44251.t1		154									PF14223 (PFAM); IPR000906 (PFAM)	no GO terms	no GO terms
TRUE	INTERPRO	g13880.t1		380									PF14223 (PFAM); IPR013848 (PFAM); IPR029472 (PFAM)	P:GO:0009451; F:GO:0003824; F:GO:0051539	P:RNA modification; F:catalytic activity; F:4 iron, 4 sulfur cluster binding
TRUE	INTERPRO	g35418.t1		242									IPR000477 (PFAM)	no GO terms	no GO terms
TRUE	INTERPRO	g23922.t1		309									IPR003657 (PFAM)	P:GO:0006355; F:GO:0003700; F:GO:0043565	P:regulation of DNA-templated transcription; F:DNA-binding transcription factor activity; F:sequence-specific DNA binding
TRUE	INTERPRO	g38720.t1		373									IPR000620 (PFAM); IPR018402 (PFAM)	C:GO:0016020; C:GO:0016020	C:membrane; C:membrane
TRUE	INTERPRO	g35077.t1		260									IPR001258 (PFAM); IPR018119 (PFAM); IPR011110 (PFAM)	P:GO:0009058; F:GO:0005515; F:GO:0016844	P:biosynthetic process; F:protein binding; F:strictosidine synthase activity
TRUE	INTERPRO	g27973.t1		58									no IPS match	no IPS match	no IPS match
TRUE	INTERPRO	g15349.t1		570									IPR025314 (PFAM); PF14223 (PFAM); IPR022043 (PFAM); PF08700 (PFAM); IPR011488 (PFAM)	F:GO:0003723; F:GO:0003743	F:RNA binding; F:translation initiation factor activity
TRUE	INTERPRO	g26859.t1		277									IPR028190 (PFAM); IPR023635 (PFAM); IPR003436 (PFAM)	P:GO:0019064; C:GO:0019031	P:fusion of virus membrane with host plasma membrane; C:viral envelope
TRUE	INTERPRO	g14491.t1		188									IPR001878 (PFAM)	F:GO:0003676; F:GO:0008270	F:nucleic acid binding; F:zinc ion binding
TRUE	INTERPRO	g22344.t1		210									IPR005651 (PFAM); IPR004278 (PFAM); IPR001781 (PFAM); IPR012982 (PFAM); IPR003657 (PFAM); PF00428 (PFAM)	P:GO:0006355; F:GO:0003700; F:GO:0008270; F:GO:0043565	P:regulation of DNA-templated transcription; F:DNA-binding transcription factor activity; F:zinc ion binding; F:sequence-specific DNA binding
TRUE	INTERPRO	g32307.t1		256									IPR013830 (PFAM)	no GO terms	no GO terms
TRUE	INTERPRO	g560.t3		252									IPR016979 (PFAM); IPR013223 (PFAM); IPR000504 (PFAM); IPR024636 (PFAM); IPR005580 (PFAM)	F:GO:0003676	F:nucleic acid binding
TRUE	INTERPRO	g29311.t1		126									no IPS match	no IPS match	no IPS match
TRUE	INTERPRO	g14378.t1		404									IPR018738 (PFAM); IPR019273 (PFAM); IPR015359 (PFAM)	no GO terms	no GO terms
TRUE	INTERPRO	g35416.t1		934									IPR003656 (PFAM); PF13831 (PFAM); IPR019787 (PFAM); IPR032308 (PFAM); IPR007862 (PFAM)	F:GO:0003677; F:GO:0004017; F:GO:0005515	F:DNA binding; F:adenylate kinase activity; F:protein binding
TRUE	INTERPRO	g4511.t1		1170									IPR025724 (PFAM); IPR001584 (PFAM); IPR013103 (PFAM)	P:GO:0015074	P:DNA integration
TRUE	INTERPRO	g41102.t1		564									IPR004680 (PFAM)	P:GO:0055085; C:GO:0016020	P:transmembrane transport; C:membrane
TRUE	INTERPRO	g43190.t1		839									PF14689 (PFAM); IPR031467 (PFAM); IPR021799 (PFAM); IPR002885 (PFAM); IPR002885 (PFAM); IPR013105 (PFAM); IPR024319 (PFAM); IPR025573 (PFAM); PF14559 (PFAM); IPR002885 (PFAM); IPR019183 (PFAM); IPR013888 (PFAM); IPR002885 (PFAM)	P:GO:0006417; F:GO:0045182	P:regulation of translation; F:translation regulator activity
TRUE	INTERPRO	g17669.t1		404									IPR009262 (PFAM); IPR029395 (PFAM); IPR013936 (PFAM)	P:GO:0006810; C:GO:0016020	P:transport; C:membrane
TRUE	INTERPRO	g31039.t1		311									IPR011016 (PFAM); IPR022143 (PFAM)	F:GO:0008270	F:zinc ion binding
TRUE	INTERPRO	g30666.t1		298									IPR008586 (PFAM)	no GO terms	no GO terms
TRUE	INTERPRO	g39266.t1		911									IPR007187 (PFAM); IPR012588 (PFAM); IPR002562 (PFAM); IPR002121 (PFAM)	P:GO:0006139; P:GO:0006396; F:GO:0003676; F:GO:0008408; C:GO:0000176; C:GO:0005622	P:nucleobase-containing compound metabolic process; P:RNA processing; F:nucleic acid binding; F:3'-5' exonuclease activity; C:nuclear exosome (RNase complex); C:intracellular anatomical structure
TRUE	INTERPRO	g6277.t1		356									IPR000719 (PFAM)	P:GO:0006468; F:GO:0004672; F:GO:0005524	P:protein phosphorylation; F:protein kinase activity; F:ATP binding
TRUE	INTERPRO	g23950.t1		492									IPR013601 (PFAM); IPR013747 (PFAM)	P:GO:0006633; F:GO:0016747; C:GO:0016020	P:fatty acid biosynthetic process; F:acyltransferase activity, transferring groups other than amino-acyl groups; C:membrane
TRUE	INTERPRO	g22431.t1		383									IPR001841 (PFAM)	F:GO:0005515; F:GO:0008270	F:protein binding; F:zinc ion binding
TRUE	INTERPRO	g16178.t1		431									IPR013103 (PFAM)	no GO terms	no GO terms
TRUE	INTERPRO	g22008.t1		430									IPR002885 (PFAM); IPR013105 (PFAM); IPR002885 (PFAM); IPR002885 (PFAM)	no GO terms	no GO terms
TRUE	INTERPRO	g14955.t1		179									IPR006501 (PFAM)	F:GO:0004857	F:enzyme inhibitor activity
TRUE	INTERPRO	g44253.t1		1374									IPR006703 (PFAM); IPR024283 (PFAM); IPR022812 (PFAM)	F:GO:0005525	F:GTP binding
TRUE	INTERPRO	g43298.t1		100									no IPS match	no IPS match	no IPS match
TRUE	INTERPRO	g588.t1		340									IPR013094 (PFAM)	P:GO:0008152; F:GO:0016787	P:metabolic process; F:hydrolase activity
TRUE	INTERPRO	g12639.t1		449									IPR019532 (PFAM); IPR001708 (PFAM)	P:GO:0051205; C:GO:0016020	P:protein insertion into membrane; C:membrane
TRUE	INTERPRO	g36247.t1		239									IPR002093 (PFAM); IPR012864 (PFAM)	P:GO:0055114; F:GO:0016702	P:obsolete oxidation-reduction process; F:oxidoreductase activity, acting on single donors with incorporation of molecular oxygen, incorporation of two atoms of oxygen
TRUE	INTERPRO	g7810.t1		454									IPR001772 (PFAM); IPR004041 (PFAM); IPR001251 (PFAM); IPR000719 (PFAM)	P:GO:0006468; P:GO:0007165; F:GO:0004672; F:GO:0005524	P:protein phosphorylation; P:signal transduction; F:protein kinase activity; F:ATP binding
TRUE	INTERPRO	g12667.t1		421									IPR002657 (PFAM)	C:GO:0016020	C:membrane
TRUE	INTERPRO	g19774.t1		846									IPR002934 (PFAM); IPR004084 (PFAM); IPR002058 (PFAM)	P:GO:0007131; F:GO:0003677; F:GO:0016779	P:reciprocal meiotic recombination; F:DNA binding; F:nucleotidyltransferase activity
TRUE	INTERPRO	g490.t1		198									IPR024970 (PFAM); IPR006501 (PFAM); IPR025700 (PFAM)	F:GO:0004857	F:enzyme inhibitor activity
TRUE	INTERPRO	g35099.t1		118									IPR016140 (PFAM); IPR007237 (PFAM)	C:GO:0016020	C:membrane
TRUE	INTERPRO	g8948.t1		122									no IPS match	no IPS match	no IPS match
TRUE	INTERPRO	g11655.t1		110									no IPS match	no IPS match	no IPS match
TRUE	INTERPRO	g30770.t1		354									IPR001680 (PFAM); IPR024977 (PFAM)	F:GO:0005515	F:protein binding
TRUE	INTERPRO	g43296.t1		112									IPR008906 (PFAM)	F:GO:0046983	F:protein dimerization activity
TRUE	INTERPRO	g33833.t1		269									IPR005175 (PFAM)	no GO terms	no GO terms
TRUE	INTERPRO	g16489.t1		122									IPR004241 (PFAM); IPR001452 (PFAM)	F:GO:0005515	F:protein binding
TRUE	INTERPRO	g42466.t1		382									IPR009770 (PFAM)	no GO terms	no GO terms
TRUE	INTERPRO	g15136.t1		429									IPR013103 (PFAM)	no GO terms	no GO terms
TRUE	INTERPRO	g28163.t1		322									PF13432 (PFAM); IPR001478 (PFAM)	F:GO:0005515	F:protein binding
TRUE	INTERPRO	g26322.t1		277									IPR013766 (PFAM)	P:GO:0045454	P:cell redox homeostasis
TRUE	INTERPRO	g38442.t1		350									IPR001932 (PFAM)	F:GO:0003824	F:catalytic activity
TRUE	INTERPRO	g41879.t2		262									IPR000209 (PFAM); IPR011016 (PFAM)	P:GO:0006508; F:GO:0004252; F:GO:0008270	P:proteolysis; F:serine-type endopeptidase activity; F:zinc ion binding
TRUE	INTERPRO	g36997.t1		655									IPR024977 (PFAM); IPR001680 (PFAM); IPR029429 (PFAM)	F:GO:0005515	F:protein binding
TRUE	INTERPRO	g15642.t1		368									IPR019446 (PFAM)	no GO terms	no GO terms
TRUE	INTERPRO	g21557.t2		176									IPR007808 (PFAM); IPR006780 (PFAM); IPR005735 (PFAM)	P:GO:0007275	P:multicellular organism development
TRUE	INTERPRO	g7947.t1		839									IPR003340 (PFAM); IPR033389 (PFAM); IPR010525 (PFAM)	P:GO:0006355; P:GO:0009725; F:GO:0003677; C:GO:0005634	P:regulation of DNA-templated transcription; P:response to hormone; F:DNA binding; C:nucleus
TRUE	INTERPRO	g438.t1		569									IPR020058 (PFAM)	P:GO:0043039; F:GO:0004812; F:GO:0005524	P:tRNA aminoacylation; F:aminoacyl-tRNA ligase activity; F:ATP binding
TRUE	INTERPRO	g13647.t1		390									IPR022630 (PFAM); IPR022629 (PFAM); IPR022628 (PFAM); IPR002686 (PFAM)	P:GO:0006313; P:GO:0006556; F:GO:0003677; F:GO:0004478; F:GO:0004803	P:DNA transposition; P:S-adenosylmethionine biosynthetic process; F:DNA binding; F:methionine adenosyltransferase activity; F:transposase activity
TRUE	INTERPRO	g36354.t1		1334									PF14223 (PFAM); IPR013103 (PFAM); IPR025724 (PFAM); IPR025314 (PFAM); IPR016541 (PFAM); IPR001584 (PFAM)	P:GO:0015074	P:DNA integration
TRUE	INTERPRO	g42273.t1		130									no IPS match	no IPS match	no IPS match
TRUE	INTERPRO	g31656.t1		226									IPR001356 (PFAM); IPR003106 (PFAM); IPR013252 (PFAM); IPR008422 (PFAM)	P:GO:0006355; F:GO:0003677; F:GO:0003700; F:GO:0043565	P:regulation of DNA-templated transcription; F:DNA binding; F:DNA-binding transcription factor activity; F:sequence-specific DNA binding
TRUE	INTERPRO	g1115.t1		209									IPR029501 (PFAM)	no GO terms	no GO terms
TRUE	INTERPRO	g30285.t1		356									IPR032527 (PFAM); IPR008183 (PFAM)	P:GO:0005975; F:GO:0016853	P:carbohydrate metabolic process; F:isomerase activity
TRUE	INTERPRO	g28076.t1		254									IPR008383 (PFAM); IPR002775 (PFAM)	F:GO:0003676	F:nucleic acid binding
TRUE	INTERPRO	g24513.t1		351									no IPS match	no IPS match	no IPS match
TRUE	INTERPRO	g41608.t1		313									no IPS match	no IPS match	no IPS match
TRUE	INTERPRO	g28520.t1		100									IPR001349 (PFAM)	F:GO:0004129; C:GO:0005743; C:GO:0005751	F:cytochrome-c oxidase activity; C:mitochondrial inner membrane; C:obsolete mitochondrial respiratory chain complex IV
TRUE	INTERPRO	g20171.t1		386									IPR006917 (PFAM); IPR018790 (PFAM); IPR013233 (PFAM)	P:GO:0006506; C:GO:0005789	P:GPI anchor biosynthetic process; C:endoplasmic reticulum membrane
TRUE	INTERPRO	g34767.t2		236									IPR003397 (PFAM); IPR007136 (PFAM)	no GO terms	no GO terms
TRUE	INTERPRO	g23595.t1		368									IPR001932 (PFAM)	F:GO:0003824	F:catalytic activity
TRUE	INTERPRO	g3697.t1		355									IPR007811 (PFAM)	P:GO:0006383; F:GO:0003677; F:GO:0003899; C:GO:0005666	P:transcription by RNA polymerase III; F:DNA binding; F:DNA-directed 5'-3' RNA polymerase activity; C:RNA polymerase III complex
TRUE	INTERPRO	g5186.t1		528									IPR019156 (PFAM); IPR000225 (PFAM); IPR013180 (PFAM); IPR002652 (PFAM); IPR032413 (PFAM); IPR029452 (PFAM)	P:GO:0006606; F:GO:0005515; F:GO:0008565; C:GO:0005634; C:GO:0005737	P:protein import into nucleus; F:protein binding; F:obsolete protein transporter activity; C:nucleus; C:cytoplasm
TRUE	INTERPRO	g41287.t1		202									no IPS match	no IPS match	no IPS match
TRUE	INTERPRO	g30239.t1		176									IPR003245 (PFAM)	F:GO:0009055	F:electron transfer activity
TRUE	INTERPRO	g45967.t1		431									IPR032352 (PFAM); IPR004827 (PFAM); IPR004826 (PFAM); IPR004827 (PFAM)	P:GO:0006355; F:GO:0003677; F:GO:0003700; F:GO:0043565; C:GO:0005634	P:regulation of DNA-templated transcription; F:DNA binding; F:DNA-binding transcription factor activity; F:sequence-specific DNA binding; C:nucleus
TRUE	INTERPRO	g13767.t1		601									IPR007662 (PFAM); PF03999 (PFAM)	no GO terms	no GO terms
TRUE	INTERPRO	g37790.t2		482									IPR001394 (PFAM); IPR000626 (PFAM)	P:GO:0016579; F:GO:0004843; F:GO:0005515	P:protein deubiquitination; F:cysteine-type deubiquitinase activity; F:protein binding
TRUE	INTERPRO	g17651.t1		128									no IPS match	no IPS match	no IPS match
TRUE	INTERPRO	g9783.t1		727									IPR006876 (PFAM); IPR031614 (PFAM)	no GO terms	no GO terms
TRUE	INTERPRO	g29079.t1		547									no IPS match	no IPS match	no IPS match
TRUE	INTERPRO	g29908.t1		503									IPR006680 (PFAM)	F:GO:0016787	F:hydrolase activity
TRUE	INTERPRO	g23541.t1		338									IPR001878 (PFAM); PF14223 (PFAM)	F:GO:0003676; F:GO:0008270	F:nucleic acid binding; F:zinc ion binding
TRUE	INTERPRO	g24715.t1		338									IPR001878 (PFAM); PF14223 (PFAM)	F:GO:0003676; F:GO:0008270	F:nucleic acid binding; F:zinc ion binding
TRUE	INTERPRO	g13607.t1		150									IPR009075 (PFAM)	P:GO:0055114; F:GO:0016627	P:obsolete oxidation-reduction process; F:oxidoreductase activity, acting on the CH-CH group of donors
TRUE	INTERPRO	g42703.t1		184									PF13837 (PFAM); IPR019083 (PFAM)	no GO terms	no GO terms
TRUE	INTERPRO	g32983.t1		408									IPR019378 (PFAM)	no GO terms	no GO terms
TRUE	INTERPRO	g9263.t1		1376									IPR001878 (PFAM); PF14223 (PFAM); IPR025724 (PFAM); IPR013103 (PFAM); IPR001584 (PFAM); IPR001584 (PFAM)	P:GO:0015074; F:GO:0003676; F:GO:0008270	P:DNA integration; F:nucleic acid binding; F:zinc ion binding
TRUE	INTERPRO	g20596.t1		439									IPR013057 (PFAM)	no GO terms	no GO terms
TRUE	INTERPRO	g10025.t1		150									PF14522 (PFAM)	no GO terms	no GO terms
TRUE	INTERPRO	g11301.t1		635									IPR000719 (PFAM); IPR025287 (PFAM)	P:GO:0006468; F:GO:0004672; F:GO:0005524; F:GO:0030247	P:protein phosphorylation; F:protein kinase activity; F:ATP binding; F:polysaccharide binding
TRUE	INTERPRO	g16424.t1		245									IPR001005 (PFAM)	no GO terms	no GO terms
TRUE	INTERPRO	g11510.t1		350									IPR006766 (PFAM)	no GO terms	no GO terms
TRUE	INTERPRO	g32757.t1		353									no IPS match	no IPS match	no IPS match
TRUE	INTERPRO	g4529.t1		346									IPR005123 (PFAM); IPR026992 (PFAM)	P:GO:0055114; F:GO:0016491	P:obsolete oxidation-reduction process; F:oxidoreductase activity
TRUE	INTERPRO	g24254.t2		660									IPR004813 (PFAM)	P:GO:0055085	P:transmembrane transport
TRUE	INTERPRO	g8900.t1		285									IPR006828 (PFAM); IPR032640 (PFAM)	F:GO:0005515	F:protein binding
TRUE	INTERPRO	g35572.t1		147									no IPS match	no IPS match	no IPS match
TRUE	INTERPRO	g12799.t1		361									IPR000086 (PFAM)	F:GO:0016787	F:hydrolase activity
TRUE	INTERPRO	g12845.t1		359									IPR001471 (PFAM)	P:GO:0006355; F:GO:0003700	P:regulation of DNA-templated transcription; F:DNA-binding transcription factor activity
TRUE	INTERPRO	g38391.t1		367									IPR005123 (PFAM); IPR026992 (PFAM)	P:GO:0055114; F:GO:0016491	P:obsolete oxidation-reduction process; F:oxidoreductase activity
TRUE	INTERPRO	g36265.t1		567									IPR032867 (PFAM); IPR002885 (PFAM); PF14559 (PFAM); IPR002885 (PFAM); IPR024508 (PFAM); IPR002885 (PFAM)	F:GO:0008270	F:zinc ion binding
TRUE	INTERPRO	g19434.t1		362									IPR007949 (PFAM); IPR001471 (PFAM); IPR003340 (PFAM)	P:GO:0006355; F:GO:0003677; F:GO:0003700	P:regulation of DNA-templated transcription; F:DNA binding; F:DNA-binding transcription factor activity
TRUE	INTERPRO	g44527.t1		355									IPR000073 (PFAM)	no GO terms	no GO terms
TRUE	INTERPRO	g15149.t1		1517									IPR032422 (PFAM); PF13975 (PFAM); IPR001584 (PFAM); IPR008769 (PFAM); IPR023780 (PFAM); IPR000074 (PFAM); IPR015416 (PFAM); IPR000477 (PFAM); IPR024675 (PFAM); IPR005162 (PFAM); IPR018791 (PFAM); IPR013253 (PFAM)	P:GO:0006869; P:GO:0010508; P:GO:0015074; P:GO:0042157; F:GO:0008289; C:GO:0005576	P:lipid transport; P:positive regulation of autophagy; P:DNA integration; P:lipoprotein metabolic process; F:lipid binding; C:extracellular region
TRUE	INTERPRO	g24579.t1		509									IPR015866 (PFAM); IPR015174 (PFAM); IPR007930 (PFAM); IPR002314 (PFAM); IPR005646 (PFAM)	P:GO:0006418; P:GO:0016070; F:GO:0000166; F:GO:0004812; F:GO:0005524	P:tRNA aminoacylation for protein translation; P:RNA metabolic process; F:nucleotide binding; F:aminoacyl-tRNA ligase activity; F:ATP binding
TRUE	INTERPRO	g12618.t1		354									no IPS match	no IPS match	no IPS match
TRUE	INTERPRO	g4884.t1		436									IPR001509 (PFAM)	F:GO:0003824; F:GO:0050662	F:catalytic activity; F:obsolete coenzyme binding
TRUE	INTERPRO	g29716.t1		542									IPR021552 (PFAM); IPR012419 (PFAM)	no GO terms	no GO terms
TRUE	INTERPRO	g41177.t2		405									IPR000477 (PFAM)	no GO terms	no GO terms
TRUE	INTERPRO	g6417.t1		486									IPR024398 (PFAM); IPR002885 (PFAM); IPR005062 (PFAM); IPR001440 (PFAM); IPR002885 (PFAM); IPR002885 (PFAM); IPR029380 (PFAM); IPR013105 (PFAM)	F:GO:0005515	F:protein binding
TRUE	INTERPRO	g29362.t1		235									IPR005162 (PFAM)	no GO terms	no GO terms
TRUE	INTERPRO	g2729.t1		338									IPR007671 (PFAM); PF14223 (PFAM); IPR001878 (PFAM)	F:GO:0003676; F:GO:0008270	F:nucleic acid binding; F:zinc ion binding
TRUE	INTERPRO	g28971.t1		304									IPR003656 (PFAM)	F:GO:0003677	F:DNA binding
TRUE	INTERPRO	g20841.t1		467									IPR001128 (PFAM); IPR015121 (PFAM)	P:GO:0055114; F:GO:0005506; F:GO:0016705; F:GO:0020037	P:obsolete oxidation-reduction process; F:iron ion binding; F:oxidoreductase activity, acting on paired donors, with incorporation or reduction of molecular oxygen; F:heme binding
TRUE	INTERPRO	g31237.t1		538									IPR002048 (PFAM); IPR002048 (PFAM); IPR009989 (PFAM); PF01163 (PFAM); PF13517 (PFAM); IPR000719 (PFAM)	P:GO:0006468; F:GO:0004672; F:GO:0005509; F:GO:0005524	P:protein phosphorylation; F:protein kinase activity; F:calcium ion binding; F:ATP binding
TRUE	INTERPRO	g28438.t1		266									IPR001932 (PFAM); IPR031165 (PFAM)	F:GO:0003824	F:catalytic activity
TRUE	INTERPRO	g34285.t1		114									IPR003854 (PFAM)	no GO terms	no GO terms
TRUE	INTERPRO	g32145.t1		569									IPR024746 (PFAM)	F:GO:0033926	F:endo-alpha-N-acetylgalactosaminidase activity
TRUE	INTERPRO	g14373.t1		338									PF14223 (PFAM); IPR001878 (PFAM)	F:GO:0003676; F:GO:0008270	F:nucleic acid binding; F:zinc ion binding
TRUE	INTERPRO	g41645.t1		238									IPR032634 (PFAM); IPR004320 (PFAM)	no GO terms	no GO terms
TRUE	INTERPRO	g35931.t1		1030									IPR032632 (PFAM); IPR011765 (PFAM); IPR015158 (PFAM); IPR007276 (PFAM); IPR007863 (PFAM); IPR028213 (PFAM)	C:GO:0032040	C:small-subunit processome
TRUE	INTERPRO	g34605.t1		240									IPR025836 (PFAM); IPR031848 (PFAM); IPR001878 (PFAM); PF14223 (PFAM)	P:GO:0001558; F:GO:0003676; F:GO:0003700; F:GO:0008270; F:GO:0097351	P:regulation of cell growth; F:nucleic acid binding; F:DNA-binding transcription factor activity; F:zinc ion binding; F:toxin sequestering activity
TRUE	INTERPRO	g33487.t1		370									no IPS match	no IPS match	no IPS match
TRUE	INTERPRO	g41943.t1		108									IPR032176 (PFAM); IPR005081 (PFAM)	P:GO:0006508; P:GO:0030436; F:GO:0004190	P:proteolysis; P:asexual sporulation; F:aspartic-type endopeptidase activity
TRUE	INTERPRO	g32315.t1		799									PF13540 (PFAM); IPR000719 (PFAM)	P:GO:0006468; F:GO:0004672; F:GO:0005524	P:protein phosphorylation; F:protein kinase activity; F:ATP binding
TRUE	INTERPRO	g34600.t1		171									no IPS match	no IPS match	no IPS match
TRUE	INTERPRO	g28505.t1		139									IPR015249 (PFAM)	P:GO:0042167; P:GO:0055114; F:GO:0004074; F:GO:0008270	P:heme catabolic process; P:obsolete oxidation-reduction process; F:biliverdin reductase [NAD(P)+] activity; F:zinc ion binding
TRUE	INTERPRO	g22754.t1		804									IPR000225 (PFAM); IPR003613 (PFAM); IPR007701 (PFAM); IPR000357 (PFAM); IPR006911 (PFAM); IPR002035 (PFAM); IPR013180 (PFAM); IPR011987 (PFAM)	P:GO:0016567; P:GO:1902600; F:GO:0004842; F:GO:0005515; F:GO:0042626; C:GO:0000221	P:protein ubiquitination; P:proton transmembrane transport; F:ubiquitin-protein transferase activity; F:protein binding; F:ATPase-coupled transmembrane transporter activity; C:vacuolar proton-transporting V-type ATPase, V1 domain
TRUE	INTERPRO	g22485.t1		153									IPR015310 (PFAM); IPR004252 (PFAM); IPR006668 (PFAM); IPR007383 (PFAM); IPR007700 (PFAM); IPR010633 (PFAM); IPR025136 (PFAM)	F:GO:0001671; F:GO:0051087	F:ATPase activator activity; F:protein-folding chaperone binding
TRUE	INTERPRO	g35429.t1		636									IPR012476 (PFAM)	P:GO:0016973; C:GO:0005643	P:poly(A)+ mRNA export from nucleus; C:nuclear pore
TRUE	INTERPRO	g26822.t1		663									IPR001173 (PFAM); PF13641 (PFAM); IPR001173 (PFAM)	no GO terms	no GO terms
TRUE	INTERPRO	g42761.t1		159									IPR010626 (PFAM); IPR031583 (PFAM); IPR004993 (PFAM)	no GO terms	no GO terms
TRUE	INTERPRO	g44656.t1		198									IPR025314 (PFAM); IPR019452 (PFAM); PF14223 (PFAM)	no GO terms	no GO terms
TRUE	INTERPRO	g41100.t1		357									IPR010825 (PFAM); IPR013154 (PFAM); IPR013149 (PFAM); IPR002347 (PFAM); IPR028939 (PFAM)	P:GO:0055114	P:obsolete oxidation-reduction process
TRUE	INTERPRO	g34838.t1		1257									IPR004198 (PFAM); IPR003888 (PFAM); IPR003347 (PFAM); IPR003349 (PFAM); IPR003889 (PFAM); IPR031486 (PFAM)	C:GO:0005634	C:nucleus
TRUE	INTERPRO	g5755.t1		1768									IPR000904 (PFAM); IPR000357 (PFAM); IPR015403 (PFAM); IPR032629 (PFAM); IPR032691 (PFAM); IPR032817 (PFAM); IPR012582 (PFAM)	P:GO:0006303; P:GO:0032012; F:GO:0003677; F:GO:0004677; F:GO:0005085; F:GO:0005515; F:GO:0005524; C:GO:0005634	P:double-strand break repair via nonhomologous end joining; P:regulation of ARF protein signal transduction; F:DNA binding; F:DNA-dependent protein kinase activity; F:guanyl-nucleotide exchange factor activity; F:protein binding; F:ATP binding; C:nucleus
TRUE	INTERPRO	g32312.t1		590									IPR006954 (PFAM); IPR000909 (PFAM); IPR015359 (PFAM); IPR000008 (PFAM); IPR001711 (PFAM)	P:GO:0006629; P:GO:0007165; P:GO:0035556; F:GO:0004435; F:GO:0005515	P:lipid metabolic process; P:signal transduction; P:intracellular signal transduction; F:phosphatidylinositol phospholipase C activity; F:protein binding
TRUE	INTERPRO	g44674.t1		313									no IPS match	no IPS match	no IPS match
TRUE	INTERPRO	g44126.t1		181									IPR001128 (PFAM)	P:GO:0055114; F:GO:0005506; F:GO:0016705; F:GO:0020037	P:obsolete oxidation-reduction process; F:iron ion binding; F:oxidoreductase activity, acting on paired donors, with incorporation or reduction of molecular oxygen; F:heme binding
TRUE	INTERPRO	g4257.t1		947									IPR024638 (PFAM); IPR013170 (PFAM); IPR003034 (PFAM); IPR000061 (PFAM); IPR006903 (PFAM); IPR000504 (PFAM)	P:GO:0006396; F:GO:0003676; F:GO:0003723	P:RNA processing; F:nucleic acid binding; F:RNA binding
TRUE	INTERPRO	g33308.t1		112									IPR008906 (PFAM); IPR008257 (PFAM)	P:GO:0006508; F:GO:0016805; F:GO:0046983	P:proteolysis; F:dipeptidase activity; F:protein dimerization activity
TRUE	INTERPRO	g8895.t1		175									IPR001584 (PFAM)	P:GO:0015074	P:DNA integration
TRUE	INTERPRO	g39219.t1		475									IPR006045 (PFAM)	F:GO:0045735	F:nutrient reservoir activity
TRUE	INTERPRO	g3505.t1		760									IPR001789 (PFAM); IPR019199 (PFAM); IPR003594 (PFAM); IPR003018 (PFAM); IPR003661 (PFAM)	P:GO:0000160; P:GO:0007165; F:GO:0000155; F:GO:0005515	P:phosphorelay signal transduction system; P:signal transduction; F:phosphorelay sensor kinase activity; F:protein binding
TRUE	INTERPRO	g22324.t1		538									IPR001128 (PFAM)	P:GO:0055114; F:GO:0005506; F:GO:0016705; F:GO:0020037	P:obsolete oxidation-reduction process; F:iron ion binding; F:oxidoreductase activity, acting on paired donors, with incorporation or reduction of molecular oxygen; F:heme binding
TRUE	INTERPRO	g22517.t1		372									IPR000727 (PFAM); IPR006891 (PFAM); IPR015257 (PFAM); IPR007631 (PFAM)	P:GO:0006352; P:GO:0006355; P:GO:0016480; F:GO:0003677; F:GO:0003700; F:GO:0005515; F:GO:0016987	P:DNA-templated transcription initiation; P:regulation of DNA-templated transcription; P:negative regulation of transcription by RNA polymerase III; F:DNA binding; F:DNA-binding transcription factor activity; F:protein binding; F:sigma factor activity
TRUE	INTERPRO	g16026.t1		793									IPR003609 (PFAM); IPR000858 (PFAM); IPR032455 (PFAM); IPR001480 (PFAM); IPR001245 (PFAM); IPR022049 (PFAM)	P:GO:0006468; P:GO:0048544; F:GO:0004672	P:protein phosphorylation; P:recognition of pollen; F:protein kinase activity
TRUE	INTERPRO	g45773.t1		465									IPR002130 (PFAM)	P:GO:0000413; P:GO:0006457; F:GO:0003755	P:protein peptidyl-prolyl isomerization; P:protein folding; F:peptidyl-prolyl cis-trans isomerase activity
TRUE	INTERPRO	g37667.t1		231									IPR008833 (PFAM); IPR014038 (PFAM); IPR020796 (PFAM)	P:GO:0006260; P:GO:0006414; F:GO:0003746; C:GO:0000808; C:GO:0005634	P:DNA replication; P:translational elongation; F:translation elongation factor activity; C:origin recognition complex; C:nucleus
TRUE	INTERPRO	g22591.t1		100									no IPS match	no IPS match	no IPS match
TRUE	INTERPRO	g17939.t1		262									IPR002500 (PFAM); IPR010461 (PFAM)	P:GO:0008152; P:GO:0030420; F:GO:0003824	P:metabolic process; P:establishment of competence for transformation; F:catalytic activity
TRUE	INTERPRO	g20505.t1		550									PF14223 (PFAM); IPR012943 (PFAM); IPR010377 (PFAM); IPR025314 (PFAM); IPR001878 (PFAM)	P:GO:0006260; F:GO:0003676; F:GO:0008270; C:GO:0005815	P:DNA replication; F:nucleic acid binding; F:zinc ion binding; C:microtubule organizing center
TRUE	INTERPRO	g22252.t1		778									IPR003656 (PFAM); IPR025525 (PFAM); IPR007021 (PFAM); IPR008906 (PFAM)	F:GO:0003677; F:GO:0046983	F:DNA binding; F:protein dimerization activity
TRUE	INTERPRO	g1670.t1		435									IPR000061 (PFAM); IPR000467 (PFAM)	P:GO:0006396; F:GO:0003676; F:GO:0003723	P:RNA processing; F:nucleic acid binding; F:RNA binding
TRUE	INTERPRO	g29592.t1		238									IPR019150 (PFAM); IPR018996 (PFAM)	C:GO:0005639	C:obsolete integral component of nuclear inner membrane
TRUE	INTERPRO	g33055.t1		470									IPR025952 (PFAM); IPR022052 (PFAM); IPR001680 (PFAM)	F:GO:0005515	F:protein binding
TRUE	INTERPRO	g133.t1		270									IPR025666 (PFAM); IPR024977 (PFAM); IPR001680 (PFAM)	F:GO:0005515	F:protein binding
TRUE	INTERPRO	g43535.t1		276									IPR003689 (PFAM)	P:GO:0030001; P:GO:0055085; F:GO:0046873; C:GO:0016020	P:metal ion transport; P:transmembrane transport; F:metal ion transmembrane transporter activity; C:membrane
TRUE	INTERPRO	g28709.t1		631									IPR000587 (PFAM); IPR000994 (PFAM); PF16189 (PFAM); IPR032416 (PFAM)	F:GO:0016787	F:hydrolase activity
TRUE	INTERPRO	g22396.t1		259									no IPS match	no IPS match	no IPS match
TRUE	INTERPRO	g40584.t1		1165									IPR013103 (PFAM); IPR001584 (PFAM); IPR025724 (PFAM)	P:GO:0015074	P:DNA integration
TRUE	INTERPRO	g20180.t1		174									no IPS match	no IPS match	no IPS match
TRUE	INTERPRO	g25480.t1		144									IPR006736 (PFAM); IPR011259 (PFAM); IPR031398 (PFAM); IPR025593 (PFAM); IPR025207 (PFAM); IPR007060 (PFAM); IPR025254 (PFAM); IPR010982 (PFAM); IPR003106 (PFAM); IPR010009 (PFAM)	P:GO:0006355; P:GO:0006869; P:GO:0007049; P:GO:0048309; P:GO:0048870; P:GO:0051028; F:GO:0003677; F:GO:0003700; F:GO:0008092; F:GO:0008289; F:GO:0043565; C:GO:0005576; C:GO:0005737; C:GO:0019898; C:GO:0031514	P:regulation of DNA-templated transcription; P:lipid transport; P:cell cycle; P:endoplasmic reticulum inheritance; P:cell motility; P:mRNA transport; F:DNA binding; F:DNA-binding transcription factor activity; F:cytoskeletal protein binding; F:lipid binding; F:sequence-specific DNA binding; C:extracellular region; C:cytoplasm; C:extrinsic component of membrane; C:motile cilium
TRUE	INTERPRO	g26358.t1		238									no IPS match	no IPS match	no IPS match
TRUE	INTERPRO	g42718.t1		471									IPR004320 (PFAM); IPR008802 (PFAM); IPR032222 (PFAM); IPR001128 (PFAM)	P:GO:0055114; F:GO:0005506; F:GO:0016705; F:GO:0020037	P:obsolete oxidation-reduction process; F:iron ion binding; F:oxidoreductase activity, acting on paired donors, with incorporation or reduction of molecular oxygen; F:heme binding
TRUE	INTERPRO	g37622.t1		402									IPR016090 (PFAM); IPR011072 (PFAM); IPR003436 (PFAM); IPR010307 (PFAM); IPR019314 (PFAM)	P:GO:0006644; P:GO:0007155; P:GO:0007165; P:GO:0019064; P:GO:0050482; F:GO:0004623; C:GO:0019031	P:phospholipid metabolic process; P:cell adhesion; P:signal transduction; P:fusion of virus membrane with host plasma membrane; P:arachidonate secretion; F:phospholipase A2 activity; C:viral envelope
TRUE	INTERPRO	g98.t1		228									IPR004243 (PFAM); IPR000238 (PFAM); IPR009594 (PFAM)	P:GO:0006364; C:GO:0019028	P:rRNA processing; C:viral capsid
TRUE	INTERPRO	g13634.t1		246									IPR025715 (PFAM); IPR000504 (PFAM)	F:GO:0003676	F:nucleic acid binding
TRUE	INTERPRO	g32359.t2		285									IPR000089 (PFAM); PF13533 (PFAM)	no GO terms	no GO terms
TRUE	INTERPRO	g34360.t1		648									IPR002495 (PFAM)	F:GO:0016757	F:glycosyltransferase activity
TRUE	INTERPRO	g10604.t1		291									IPR016965 (PFAM)	F:GO:0016791	F:phosphatase activity
TRUE	INTERPRO	g21513.t1		272									IPR011705 (PFAM); IPR000210 (PFAM); IPR018688 (PFAM)	F:GO:0005515	F:protein binding
TRUE	INTERPRO	g14456.t1		554									IPR021480 (PFAM); IPR006734 (PFAM); IPR001202 (PFAM)	F:GO:0005515	F:protein binding
TRUE	INTERPRO	g41170.t1		338									IPR001878 (PFAM); PF14223 (PFAM)	F:GO:0003676; F:GO:0008270	F:nucleic acid binding; F:zinc ion binding
TRUE	INTERPRO	g21078.t1		341									IPR019465 (PFAM)	P:GO:0006891; C:GO:0017119	P:intra-Golgi vesicle-mediated transport; C:Golgi transport complex
TRUE	INTERPRO	g41371.t1		914									IPR003656 (PFAM); IPR000340 (PFAM); IPR015275 (PFAM)	P:GO:0006470; F:GO:0003677; F:GO:0008138	P:protein dephosphorylation; F:DNA binding; F:protein tyrosine/serine/threonine phosphatase activity
TRUE	INTERPRO	g35590.t1		567									IPR001890 (PFAM)	F:GO:0003723	F:RNA binding
TRUE	INTERPRO	g38101.t1		148									IPR019143 (PFAM); IPR032755 (PFAM); IPR032524 (PFAM); IPR031681 (PFAM); IPR013854 (PFAM); IPR007705 (PFAM)	P:GO:0006886; F:GO:0003677; C:GO:0016020	P:intracellular protein transport; F:DNA binding; C:membrane
TRUE	INTERPRO	g25741.t1		348									IPR000477 (PFAM)	no GO terms	no GO terms
TRUE	INTERPRO	g35681.t1		312									IPR003656 (PFAM); IPR008906 (PFAM)	F:GO:0003677; F:GO:0046983	F:DNA binding; F:protein dimerization activity
TRUE	INTERPRO	g37767.t1		372									IPR007631 (PFAM); IPR000727 (PFAM); IPR006891 (PFAM)	P:GO:0006352; P:GO:0006355; F:GO:0003677; F:GO:0003700; F:GO:0005515; F:GO:0016987	P:DNA-templated transcription initiation; P:regulation of DNA-templated transcription; F:DNA binding; F:DNA-binding transcription factor activity; F:protein binding; F:sigma factor activity
TRUE	INTERPRO	g2384.t1		100									no IPS match	no IPS match	no IPS match
TRUE	INTERPRO	g240.t1		151									no IPS match	no IPS match	no IPS match
TRUE	INTERPRO	g30193.t2		320									IPR018108 (PFAM)	no GO terms	no GO terms
TRUE	INTERPRO	g29629.t1		125									IPR005813 (PFAM)	P:GO:0006412; F:GO:0003735; F:GO:0019843; C:GO:0005622; C:GO:0005840	P:translation; F:structural constituent of ribosome; F:rRNA binding; C:intracellular anatomical structure; C:ribosome
TRUE	INTERPRO	g19066.t1		338									PF14223 (PFAM); IPR001878 (PFAM)	F:GO:0003676; F:GO:0008270	F:nucleic acid binding; F:zinc ion binding
TRUE	INTERPRO	g37733.t1		338									PF14223 (PFAM); IPR001878 (PFAM)	F:GO:0003676; F:GO:0008270	F:nucleic acid binding; F:zinc ion binding
TRUE	INTERPRO	g32776.t1		338									PF14223 (PFAM); IPR001878 (PFAM)	F:GO:0003676; F:GO:0008270	F:nucleic acid binding; F:zinc ion binding
TRUE	INTERPRO	g24654.t1		338									PF14223 (PFAM); IPR001878 (PFAM)	F:GO:0003676; F:GO:0008270	F:nucleic acid binding; F:zinc ion binding
TRUE	INTERPRO	g4528.t1		338									PF14223 (PFAM); IPR001878 (PFAM)	F:GO:0003676; F:GO:0008270	F:nucleic acid binding; F:zinc ion binding
TRUE	INTERPRO	g4874.t1		100									no IPS match	no IPS match	no IPS match
TRUE	INTERPRO	g3976.t1		263									IPR007234 (PFAM); IPR004089 (PFAM); IPR002017 (PFAM); IPR005312 (PFAM); IPR005606 (PFAM); IPR031348 (PFAM); PF13324 (PFAM); IPR006990 (PFAM); IPR007696 (PFAM); PF14523 (PFAM); IPR008795 (PFAM); IPR019269 (PFAM); IPR010844 (PFAM); IPR007631 (PFAM); PF12352 (PFAM)	P:GO:0006298; P:GO:0006352; P:GO:0006355; P:GO:0007165; F:GO:0003677; F:GO:0003700; F:GO:0004871; F:GO:0005515; F:GO:0005524; F:GO:0016987; F:GO:0030983; C:GO:0016020; C:GO:0016020	P:mismatch repair; P:DNA-templated transcription initiation; P:regulation of DNA-templated transcription; P:signal transduction; F:DNA binding; F:DNA-binding transcription factor activity; F:obsolete signal transducer activity; F:protein binding; F:ATP binding; F:sigma factor activity; F:mismatched DNA binding; C:membrane; C:membrane
TRUE	INTERPRO	g45869.t1		251									IPR008580 (PFAM); IPR024324 (PFAM)	no GO terms	no GO terms
TRUE	INTERPRO	g23862.t1		380									IPR001128 (PFAM)	P:GO:0055114; F:GO:0005506; F:GO:0016705; F:GO:0020037	P:obsolete oxidation-reduction process; F:iron ion binding; F:oxidoreductase activity, acting on paired donors, with incorporation or reduction of molecular oxygen; F:heme binding
TRUE	INTERPRO	g6322.t1		756									PF14223 (PFAM); IPR001878 (PFAM); IPR025314 (PFAM); IPR013103 (PFAM)	F:GO:0003676; F:GO:0008270	F:nucleic acid binding; F:zinc ion binding
TRUE	INTERPRO	g27110.t1		584									IPR015077 (PFAM); IPR023753 (PFAM); PF13454 (PFAM); IPR002048 (PFAM); PF13450 (PFAM); IPR005119 (PFAM); IPR032593 (PFAM); IPR002048 (PFAM); IPR023753 (PFAM)	P:GO:0055114; F:GO:0005509; F:GO:0016491	P:obsolete oxidation-reduction process; F:calcium ion binding; F:oxidoreductase activity
TRUE	INTERPRO	g23437.t1		256									IPR003653 (PFAM)	P:GO:0006508; F:GO:0008234	P:proteolysis; F:cysteine-type peptidase activity
TRUE	INTERPRO	g18502.t1		271									IPR013105 (PFAM)	no GO terms	no GO terms
TRUE	INTERPRO	g30279.t1		450									IPR029209 (PFAM); IPR018316 (PFAM); IPR003008 (PFAM)	F:GO:0003924	F:GTPase activity
TRUE	INTERPRO	g6086.t2		332									IPR022383 (PFAM); IPR001236 (PFAM)	P:GO:0055114; F:GO:0016491; F:GO:0016616	P:obsolete oxidation-reduction process; F:oxidoreductase activity; F:oxidoreductase activity, acting on the CH-OH group of donors, NAD or NADP as acceptor
TRUE	INTERPRO	g23011.t1		302									IPR013103 (PFAM); IPR021849 (PFAM)	no GO terms	no GO terms
TRUE	INTERPRO	g23244.t1		142									no IPS match	no IPS match	no IPS match
TRUE	INTERPRO	g32952.t1		338									IPR007671 (PFAM); IPR001878 (PFAM); PF14223 (PFAM)	F:GO:0003676; F:GO:0008270	F:nucleic acid binding; F:zinc ion binding
TRUE	INTERPRO	g37303.t1		222									PF13917 (PFAM); IPR000504 (PFAM)	F:GO:0003676	F:nucleic acid binding
TRUE	INTERPRO	g1213.t1		609									PF13238 (PFAM); IPR000157 (PFAM); IPR007546 (PFAM); PF13173 (PFAM); IPR002182 (PFAM); IPR011579 (PFAM); IPR024231 (PFAM); IPR003959 (PFAM)	P:GO:0007165; F:GO:0005515; F:GO:0005524; F:GO:0043531	P:signal transduction; F:protein binding; F:ATP binding; F:ADP binding
TRUE	INTERPRO	g38072.t1		157									IPR008637 (PFAM)	no GO terms	no GO terms
TRUE	INTERPRO	g19583.t1		390									IPR003656 (PFAM); IPR008906 (PFAM)	F:GO:0003677; F:GO:0046983	F:DNA binding; F:protein dimerization activity
TRUE	INTERPRO	g19045.t1		108									no IPS match	no IPS match	no IPS match
TRUE	INTERPRO	g11954.t1		338									IPR001878 (PFAM); PF14223 (PFAM)	F:GO:0003676; F:GO:0008270	F:nucleic acid binding; F:zinc ion binding
TRUE	INTERPRO	g29883.t1		150									no IPS match	no IPS match	no IPS match
TRUE	INTERPRO	g22004.t1		1168									IPR001584 (PFAM); IPR025724 (PFAM); IPR013103 (PFAM)	P:GO:0015074	P:DNA integration
TRUE	INTERPRO	g32558.t1		183									no IPS match	no IPS match	no IPS match
TRUE	INTERPRO	g30176.t1		1325									IPR001878 (PFAM); IPR013103 (PFAM); PF14223 (PFAM); IPR001584 (PFAM); IPR025724 (PFAM)	P:GO:0015074; F:GO:0003676; F:GO:0008270	P:DNA integration; F:nucleic acid binding; F:zinc ion binding
TRUE	INTERPRO	g40064.t1		168									IPR001878 (PFAM)	F:GO:0003676; F:GO:0008270	F:nucleic acid binding; F:zinc ion binding
TRUE	INTERPRO	g30232.t1		1040									IPR003613 (PFAM); IPR019474 (PFAM); IPR020269 (PFAM)	P:GO:0006511; P:GO:0016567; F:GO:0004842; F:GO:0034450; C:GO:0000151	P:ubiquitin-dependent protein catabolic process; P:protein ubiquitination; F:ubiquitin-protein transferase activity; F:ubiquitin-ubiquitin ligase activity; C:ubiquitin ligase complex
TRUE	INTERPRO	g26382.t1		341									no IPS match	no IPS match	no IPS match
TRUE	INTERPRO	g12807.t1		712									IPR009769 (PFAM); IPR002913 (PFAM); IPR001849 (PFAM)	F:GO:0008289	F:lipid binding
TRUE	INTERPRO	g15632.t1		699									IPR001404 (PFAM); IPR003594 (PFAM)	P:GO:0006457; P:GO:0006950; F:GO:0005524; F:GO:0051082	P:protein folding; P:response to stress; F:ATP binding; F:unfolded protein binding
TRUE	INTERPRO	g5452.t1		465									IPR006598 (PFAM)	no GO terms	no GO terms
TRUE	INTERPRO	g26307.t1		354									no IPS match	no IPS match	no IPS match
TRUE	INTERPRO	g24598.t1		356									no IPS match	no IPS match	no IPS match
TRUE	INTERPRO	g11068.t1		1191									IPR000719 (PFAM)	P:GO:0006468; F:GO:0004672; F:GO:0005524	P:protein phosphorylation; F:protein kinase activity; F:ATP binding
TRUE	INTERPRO	g21287.t1		360									IPR013154 (PFAM); IPR013149 (PFAM)	P:GO:0055114	P:obsolete oxidation-reduction process
TRUE	INTERPRO	g43351.t1		123									IPR001854 (PFAM)	P:GO:0006412; F:GO:0003735; C:GO:0005622; C:GO:0005840	P:translation; F:structural constituent of ribosome; C:intracellular anatomical structure; C:ribosome
TRUE	INTERPRO	g33033.t1		177									IPR025314 (PFAM); PF14223 (PFAM)	no GO terms	no GO terms
TRUE	INTERPRO	g1418.t1		364									IPR005735 (PFAM); IPR025874 (PFAM); PF00656 (PFAM)	no GO terms	no GO terms
TRUE	INTERPRO	g32481.t1		582									IPR004240 (PFAM)	C:GO:0016020	C:membrane
TRUE	INTERPRO	g43644.t1		179									no IPS match	no IPS match	no IPS match
TRUE	INTERPRO	g19300.t1		245									PF14223 (PFAM)	no GO terms	no GO terms
TRUE	INTERPRO	g40023.t1		318									IPR004861 (PFAM); IPR008615 (PFAM); IPR001611 (PFAM)	F:GO:0005515	F:protein binding
TRUE	INTERPRO	g25441.t1		528									IPR003137 (PFAM); IPR007369 (PFAM)	F:GO:0004190; C:GO:0016020	F:aspartic-type endopeptidase activity; C:membrane
TRUE	INTERPRO	g46131.t1		545									IPR010762 (PFAM); IPR003162 (PFAM); IPR004823 (PFAM); IPR011442 (PFAM)	P:GO:0006352; P:GO:0051090; C:GO:0005634; C:GO:0019028; C:GO:0044423	P:DNA-templated transcription initiation; P:regulation of DNA-binding transcription factor activity; C:nucleus; C:viral capsid; C:virion component
TRUE	INTERPRO	g30557.t1		150									IPR002068 (PFAM)	no GO terms	no GO terms
TRUE	INTERPRO	g27085.t1		546									IPR006094 (PFAM); IPR012951 (PFAM)	P:GO:0055114; F:GO:0016491; F:GO:0050660	P:obsolete oxidation-reduction process; F:oxidoreductase activity; F:flavin adenine dinucleotide binding
TRUE	INTERPRO	g42325.t1		339									PF14223 (PFAM)	no GO terms	no GO terms
TRUE	INTERPRO	g41579.t1		492									IPR002213 (PFAM); IPR004212 (PFAM)	P:GO:0008152; F:GO:0016758	P:metabolic process; F:hexosyltransferase activity
TRUE	INTERPRO	g18202.t1		583									IPR033760 (PFAM); IPR005828 (PFAM)	P:GO:0055085; F:GO:0022857; C:GO:0016020	P:transmembrane transport; F:transmembrane transporter activity; C:membrane
TRUE	INTERPRO	g35223.t1		275									no IPS match	no IPS match	no IPS match
TRUE	INTERPRO	g44475.t1		401									IPR000477 (PFAM)	no GO terms	no GO terms
TRUE	INTERPRO	g35076.t1		228									IPR001789 (PFAM); IPR007874 (PFAM); IPR006854 (PFAM)	P:GO:0000160; P:GO:0019082; P:GO:0051302; F:GO:0003677	P:phosphorelay signal transduction system; P:viral protein processing; P:regulation of cell division; F:DNA binding
TRUE	INTERPRO	g7864.t1		277									IPR001584 (PFAM)	P:GO:0015074	P:DNA integration
TRUE	INTERPRO	g10015.t1		338									IPR001878 (PFAM); PF14223 (PFAM); IPR007671 (PFAM)	F:GO:0003676; F:GO:0008270	F:nucleic acid binding; F:zinc ion binding
TRUE	INTERPRO	g7361.t1		688									IPR001650 (PFAM); IPR003593 (PFAM); IPR011709 (PFAM); IPR007502 (PFAM)	F:GO:0004386	F:helicase activity
TRUE	INTERPRO	g35140.t1		144									no IPS match	no IPS match	no IPS match
TRUE	INTERPRO	g28972.t1		657									no IPS match	no IPS match	no IPS match
TRUE	INTERPRO	g8037.t1		758									IPR001650 (PFAM); IPR032438 (PFAM); IPR000330 (PFAM); IPR020838 (PFAM)	F:GO:0003677; F:GO:0005524	F:DNA binding; F:ATP binding
TRUE	INTERPRO	g3623.t1		124									no IPS match	no IPS match	no IPS match
TRUE	INTERPRO	g6205.t1		276									IPR002076 (PFAM)	C:GO:0016020	C:membrane
TRUE	INTERPRO	g44358.t2		288									IPR000996 (PFAM)	P:GO:0006886; P:GO:0016192; F:GO:0005198; C:GO:0030130; C:GO:0030132	P:intracellular protein transport; P:vesicle-mediated transport; F:structural molecule activity; C:clathrin coat of trans-Golgi network vesicle; C:clathrin coat of coated pit
TRUE	INTERPRO	g3676.t1		156									IPR001878 (PFAM)	F:GO:0003676; F:GO:0008270	F:nucleic acid binding; F:zinc ion binding
TRUE	INTERPRO	g41690.t1		492									IPR001926 (PFAM)	no GO terms	no GO terms
TRUE	INTERPRO	g40882.t1		455									IPR006852 (PFAM)	no GO terms	no GO terms
TRUE	INTERPRO	g41897.t1		180									IPR001878 (PFAM)	F:GO:0003676; F:GO:0008270	F:nucleic acid binding; F:zinc ion binding
TRUE	INTERPRO	g10635.t1		105									no IPS match	no IPS match	no IPS match
TRUE	INTERPRO	g23557.t1		1162									IPR013103 (PFAM); IPR001584 (PFAM); IPR025724 (PFAM)	P:GO:0015074	P:DNA integration
TRUE	INTERPRO	g44171.t1		778									IPR007021 (PFAM); IPR025525 (PFAM); IPR008906 (PFAM); IPR003656 (PFAM)	F:GO:0003677; F:GO:0046983	F:DNA binding; F:protein dimerization activity
TRUE	INTERPRO	g45749.t1		919									IPR000504 (PFAM); IPR027827 (PFAM); IPR012921 (PFAM)	F:GO:0003676	F:nucleic acid binding
TRUE	INTERPRO	g26240.t1		328									IPR008795 (PFAM); IPR024623 (PFAM); IPR005349 (PFAM); IPR012500 (PFAM); PF13175 (PFAM)	P:GO:0009405; F:GO:0004222; F:GO:0008270; C:GO:0005576; C:GO:0016020; C:GO:0016020	P:obsolete pathogenesis; F:metalloendopeptidase activity; F:zinc ion binding; C:extracellular region; C:membrane; C:membrane
TRUE	INTERPRO	g9759.t1		125									IPR022134 (PFAM)	no GO terms	no GO terms
TRUE	INTERPRO	g16895.t1		487									IPR001085 (PFAM)	F:GO:0016740	F:transferase activity
TRUE	INTERPRO	g34538.t1		222									IPR007087 (PFAM)	F:GO:0046872	F:metal ion binding
TRUE	INTERPRO	g9920.t1		330									IPR001433 (PFAM); IPR008333 (PFAM)	P:GO:0055114; F:GO:0016491	P:obsolete oxidation-reduction process; F:oxidoreductase activity
TRUE	INTERPRO	g43524.t1		365									IPR025875 (PFAM); IPR001611 (PFAM); IPR013210 (PFAM)	F:GO:0005515	F:protein binding
TRUE	INTERPRO	g4910.t1		779									IPR007527 (PFAM); IPR022717 (PFAM); IPR000270 (PFAM); IPR004332 (PFAM); IPR018289 (PFAM); IPR032508 (PFAM)	F:GO:0005515; F:GO:0008270	F:protein binding; F:zinc ion binding
TRUE	INTERPRO	g12097.t1		588									IPR003106 (PFAM); IPR025314 (PFAM); PF14223 (PFAM)	P:GO:0006355; F:GO:0003700; F:GO:0043565	P:regulation of DNA-templated transcription; F:DNA-binding transcription factor activity; F:sequence-specific DNA binding
TRUE	INTERPRO	g42614.t1		778									IPR003656 (PFAM); IPR007021 (PFAM); IPR025525 (PFAM); IPR008906 (PFAM)	F:GO:0003677; F:GO:0046983	F:DNA binding; F:protein dimerization activity
TRUE	INTERPRO	g40748.t1		108									no IPS match	no IPS match	no IPS match
TRUE	INTERPRO	g8122.t1		266									IPR002347 (PFAM)	no GO terms	no GO terms
TRUE	INTERPRO	g33369.t1		265									IPR022796 (PFAM)	no GO terms	no GO terms
TRUE	INTERPRO	g39353.t1		100									no IPS match	no IPS match	no IPS match
TRUE	INTERPRO	g40830.t1		553									IPR025724 (PFAM); IPR001584 (PFAM)	P:GO:0015074	P:DNA integration
TRUE	INTERPRO	g8423.t2		230									IPR028939 (PFAM); IPR029036 (PFAM)	no GO terms	no GO terms
TRUE	INTERPRO	g13533.t1		152									IPR002016 (PFAM)	P:GO:0006979; P:GO:0055114; F:GO:0004601; F:GO:0020037	P:response to oxidative stress; P:obsolete oxidation-reduction process; F:peroxidase activity; F:heme binding
TRUE	INTERPRO	g20815.t1		354									IPR023801 (PFAM)	no GO terms	no GO terms
TRUE	INTERPRO	g14708.t1		254									PF14223 (PFAM); IPR001878 (PFAM)	F:GO:0003676; F:GO:0008270	F:nucleic acid binding; F:zinc ion binding
TRUE	INTERPRO	g17745.t1		319									IPR002877 (PFAM); IPR002942 (PFAM)	P:GO:0032259; F:GO:0003723; F:GO:0008168	P:methylation; F:RNA binding; F:methyltransferase activity
TRUE	INTERPRO	g16156.t1		303									IPR003657 (PFAM)	P:GO:0006355; F:GO:0003700; F:GO:0043565	P:regulation of DNA-templated transcription; F:DNA-binding transcription factor activity; F:sequence-specific DNA binding
TRUE	INTERPRO	g38331.t1		323									IPR024041 (PFAM)	P:GO:0072488; F:GO:0008519; C:GO:0016020	P:ammonium transmembrane transport; F:ammonium channel activity; C:membrane
TRUE	INTERPRO	g45171.t1		342									IPR001878 (PFAM); PF14223 (PFAM)	F:GO:0003676; F:GO:0008270	F:nucleic acid binding; F:zinc ion binding
TRUE	INTERPRO	g31358.t1		714									IPR003891 (PFAM); IPR024214 (PFAM); IPR019413 (PFAM)	no GO terms	no GO terms
TRUE	INTERPRO	g8469.t1		533									IPR000270 (PFAM); PF13456 (PFAM); IPR018957 (PFAM); IPR004595 (PFAM); IPR002867 (PFAM)	P:GO:0006281; F:GO:0005515; F:GO:0008270; F:GO:0046872	P:DNA repair; F:protein binding; F:zinc ion binding; F:metal ion binding
TRUE	INTERPRO	g19203.t2		119									IPR007039 (PFAM)	no GO terms	no GO terms
TRUE	INTERPRO	g41927.t1		774									IPR003656 (PFAM); IPR008906 (PFAM); IPR007021 (PFAM); IPR025525 (PFAM)	F:GO:0003677; F:GO:0046983	F:DNA binding; F:protein dimerization activity
TRUE	INTERPRO	g9605.t1		108									no IPS match	no IPS match	no IPS match
TRUE	INTERPRO	g32742.t1		108									no IPS match	no IPS match	no IPS match
TRUE	INTERPRO	g6034.t1		247									IPR025745 (PFAM); IPR009292 (PFAM)	P:GO:0000469	P:obsolete cleavage involved in rRNA processing
TRUE	INTERPRO	g40130.t1		338									IPR001878 (PFAM); PF14223 (PFAM)	F:GO:0003676; F:GO:0008270	F:nucleic acid binding; F:zinc ion binding
TRUE	INTERPRO	g33567.t2		397									IPR002123 (PFAM)	P:GO:0008152; F:GO:0016746	P:metabolic process; F:acyltransferase activity
TRUE	INTERPRO	g12998.t1		353									no IPS match	no IPS match	no IPS match
TRUE	INTERPRO	g20475.t1		833									IPR009976 (PFAM); IPR019269 (PFAM)	P:GO:0006887; P:GO:0048278; C:GO:0005737	P:exocytosis; P:vesicle docking; C:cytoplasm
TRUE	INTERPRO	g4210.t1		597									IPR013809 (PFAM)	no GO terms	no GO terms
TRUE	INTERPRO	g37969.t1		93									IPR010639 (PFAM)	no GO terms	no GO terms
TRUE	INTERPRO	g424.t1		230									IPR013078 (PFAM)	no GO terms	no GO terms
TRUE	INTERPRO	g39414.t1		345									IPR009439 (PFAM); IPR009249 (PFAM)	P:GO:0010024; P:GO:0055114; F:GO:0016636; F:GO:0050897	P:phytochromobilin biosynthetic process; P:obsolete oxidation-reduction process; F:oxidoreductase activity, acting on the CH-CH group of donors, iron-sulfur protein as acceptor; F:cobalt ion binding
TRUE	INTERPRO	g40217.t1		433									IPR003386 (PFAM); IPR012908 (PFAM)	P:GO:0006629; F:GO:0008374; F:GO:0016788	P:lipid metabolic process; F:O-acyltransferase activity; F:hydrolase activity, acting on ester bonds
TRUE	INTERPRO	g17569.t1		993									IPR001357 (PFAM); IPR001510 (PFAM); IPR012317 (PFAM); IPR012982 (PFAM); IPR008702 (PFAM); IPR004102 (PFAM); IPR008893 (PFAM); IPR024461 (PFAM)	P:GO:0006471; F:GO:0003677; F:GO:0003950; F:GO:0008270; C:GO:0019028	P:obsolete protein ADP-ribosylation; F:DNA binding; F:NAD+-protein poly-ADP-ribosyltransferase activity; F:zinc ion binding; C:viral capsid
TRUE	INTERPRO	g20028.t1		402									IPR002305 (PFAM)	P:GO:0006418; F:GO:0000166; F:GO:0004812; F:GO:0005524	P:tRNA aminoacylation for protein translation; F:nucleotide binding; F:aminoacyl-tRNA ligase activity; F:ATP binding
TRUE	INTERPRO	g32878.t1		104									IPR019011 (PFAM)	no GO terms	no GO terms
TRUE	INTERPRO	g32052.t1		222									IPR004041 (PFAM); IPR000719 (PFAM)	P:GO:0006468; P:GO:0007165; F:GO:0004672; F:GO:0005524	P:protein phosphorylation; P:signal transduction; F:protein kinase activity; F:ATP binding
TRUE	INTERPRO	g22498.t1		76									no IPS match	no IPS match	no IPS match
TRUE	INTERPRO	g35149.t2		455									IPR000743 (PFAM)	P:GO:0005975; F:GO:0004650	P:carbohydrate metabolic process; F:polygalacturonase activity
TRUE	INTERPRO	g25180.t1		444									IPR001245 (PFAM)	P:GO:0006468; F:GO:0004672	P:protein phosphorylation; F:protein kinase activity
TRUE	INTERPRO	g37586.t1		261									IPR001810 (PFAM); IPR025886 (PFAM)	F:GO:0005515	F:protein binding
TRUE	INTERPRO	g44425.t1		419									IPR029472 (PFAM); PF14223 (PFAM); IPR021636 (PFAM)	no GO terms	no GO terms
TRUE	INTERPRO	g278.t1		222									no IPS match	no IPS match	no IPS match
TRUE	INTERPRO	g37132.t1		595									IPR009903 (PFAM); IPR022709 (PFAM); IPR018060 (PFAM)	P:GO:0006351; P:GO:0006355; F:GO:0003700; F:GO:0003714; F:GO:0043565	P:DNA-templated transcription; P:regulation of DNA-templated transcription; F:DNA-binding transcription factor activity; F:transcription corepressor activity; F:sequence-specific DNA binding
TRUE	INTERPRO	g46124.t1		216									IPR022153 (PFAM); IPR004284 (PFAM); IPR019532 (PFAM); IPR001005 (PFAM); IPR019562 (PFAM)	no GO terms	no GO terms
TRUE	INTERPRO	g922.t1		629									no IPS match	no IPS match	no IPS match
TRUE	INTERPRO	g39199.t1		510									IPR005202 (PFAM)	no GO terms	no GO terms
TRUE	INTERPRO	g6209.t1		476									no IPS match	no IPS match	no IPS match
TRUE	INTERPRO	g12214.t1		339									IPR001878 (PFAM); PF14223 (PFAM)	F:GO:0003676; F:GO:0008270	F:nucleic acid binding; F:zinc ion binding
TRUE	INTERPRO	g23775.t1		418									IPR022742 (PFAM); IPR032311 (PFAM); IPR006693 (PFAM)	P:GO:0006629	P:lipid metabolic process
TRUE	INTERPRO	g19317.t1		276									IPR019787 (PFAM); PF14369 (PFAM); IPR022042 (PFAM); IPR003851 (PFAM)	P:GO:0006355; F:GO:0003677; F:GO:0005515	P:regulation of DNA-templated transcription; F:DNA binding; F:protein binding
TRUE	INTERPRO	g2122.t2		493									IPR015590 (PFAM)	P:GO:0008152; P:GO:0055114; F:GO:0016491	P:metabolic process; P:obsolete oxidation-reduction process; F:oxidoreductase activity
TRUE	INTERPRO	g3002.t1		889									IPR000719 (PFAM)	P:GO:0006468; F:GO:0004672; F:GO:0005524	P:protein phosphorylation; F:protein kinase activity; F:ATP binding
TRUE	INTERPRO	g41054.t1		210									PF14223 (PFAM); PF08700 (PFAM)	no GO terms	no GO terms
TRUE	INTERPRO	g19949.t1		445									IPR029191 (PFAM); IPR001895 (PFAM); IPR002810 (PFAM); IPR027914 (PFAM); IPR001664 (PFAM); IPR029303 (PFAM); IPR002523 (PFAM)	P:GO:0007264; P:GO:0030001; P:GO:0055085; F:GO:0005085; F:GO:0005198; F:GO:0046873; C:GO:0005882; C:GO:0016020	P:small GTPase-mediated signal transduction; P:metal ion transport; P:transmembrane transport; F:guanyl-nucleotide exchange factor activity; F:structural molecule activity; F:metal ion transmembrane transporter activity; C:intermediate filament; C:membrane
TRUE	INTERPRO	g11529.t1		519									IPR011701 (PFAM)	P:GO:0055085; C:GO:0016020	P:transmembrane transport; C:membrane
TRUE	INTERPRO	g11075.t1		215									IPR015410 (PFAM)	no GO terms	no GO terms
TRUE	INTERPRO	g33022.t1		135									IPR020117 (PFAM)	no GO terms	no GO terms
TRUE	INTERPRO	g1791.t1		500									IPR002885 (PFAM); IPR031774 (PFAM); PF14559 (PFAM); IPR002885 (PFAM)	no GO terms	no GO terms
TRUE	INTERPRO	g25289.t1		350									IPR000073 (PFAM)	no GO terms	no GO terms
TRUE	INTERPRO	g25103.t1		267									IPR006634 (PFAM)	C:GO:0016020	C:membrane
TRUE	INTERPRO	g16840.t1		530									IPR015793 (PFAM); IPR015795 (PFAM)	P:GO:0006096; F:GO:0000287; F:GO:0004743; F:GO:0030955	P:glycolytic process; F:magnesium ion binding; F:pyruvate kinase activity; F:potassium ion binding
TRUE	INTERPRO	g29018.t1		477									IPR003657 (PFAM); IPR010377 (PFAM)	P:GO:0006260; P:GO:0006355; F:GO:0003700; F:GO:0043565	P:DNA replication; P:regulation of DNA-templated transcription; F:DNA-binding transcription factor activity; F:sequence-specific DNA binding
TRUE	INTERPRO	g45169.t1		515									IPR017923 (PFAM)	C:GO:0005634	C:nucleus
TRUE	INTERPRO	g8119.t1		98									IPR002048 (PFAM); IPR002048 (PFAM)	F:GO:0005509	F:calcium ion binding
TRUE	INTERPRO	g43861.t1		312									IPR013137 (PFAM); IPR009994 (PFAM); IPR013150 (PFAM)	F:GO:0017025	F:TBP-class protein binding
TRUE	INTERPRO	g23073.t1		407									IPR029333 (PFAM); IPR007448 (PFAM); IPR010903 (PFAM); IPR008622 (PFAM); IPR029236 (PFAM); IPR012582 (PFAM); IPR021398 (PFAM); IPR008511 (PFAM); IPR010379 (PFAM)	P:GO:0000921; P:GO:0006303; P:GO:0006355; F:GO:0003677; F:GO:0004677; F:GO:0005524; C:GO:0005634; C:GO:0005940; C:GO:0016020	P:septin ring assembly; P:double-strand break repair via nonhomologous end joining; P:regulation of DNA-templated transcription; F:DNA binding; F:DNA-dependent protein kinase activity; F:ATP binding; C:nucleus; C:septin ring; C:membrane
TRUE	INTERPRO	g9790.t1		340									IPR011074 (PFAM); IPR001251 (PFAM)	no GO terms	no GO terms
TRUE	INTERPRO	g31871.t1		205									IPR001878 (PFAM)	F:GO:0003676; F:GO:0008270	F:nucleic acid binding; F:zinc ion binding
TRUE	INTERPRO	g34300.t2		227									IPR032798 (PFAM); IPR013857 (PFAM)	no GO terms	no GO terms
TRUE	INTERPRO	g43777.t1		681									IPR013126 (PFAM); IPR019258 (PFAM)	P:GO:0006357; F:GO:0003712; C:GO:0016592	P:regulation of transcription by RNA polymerase II; F:transcription coregulator activity; C:mediator complex
TRUE	INTERPRO	g24297.t1		123									IPR019587 (PFAM)	no GO terms	no GO terms
TRUE	INTERPRO	g23205.t1		651									IPR003470 (PFAM); IPR000719 (PFAM); IPR001611 (PFAM); IPR013210 (PFAM); IPR027789 (PFAM)	P:GO:0006468; F:GO:0004672; F:GO:0005515; F:GO:0005524	P:protein phosphorylation; F:protein kinase activity; F:protein binding; F:ATP binding
TRUE	INTERPRO	g21681.t2		782									IPR002372 (PFAM); IPR001480 (PFAM); IPR000858 (PFAM); IPR003609 (PFAM); IPR001245 (PFAM)	P:GO:0006468; P:GO:0048544; F:GO:0004672	P:protein phosphorylation; P:recognition of pollen; F:protein kinase activity
TRUE	INTERPRO	g6650.t1		353									no IPS match	no IPS match	no IPS match
TRUE	INTERPRO	g28431.t1		676									IPR002885 (PFAM); IPR002885 (PFAM); IPR024319 (PFAM)	no GO terms	no GO terms
TRUE	INTERPRO	g41097.t1		1325									PF14223 (PFAM); IPR001584 (PFAM); IPR001878 (PFAM); IPR025724 (PFAM); IPR013103 (PFAM)	P:GO:0015074; F:GO:0003676; F:GO:0008270	P:DNA integration; F:nucleic acid binding; F:zinc ion binding
TRUE	INTERPRO	g23472.t1		437									IPR005141 (PFAM); IPR005140 (PFAM); IPR005142 (PFAM); IPR024261 (PFAM)	F:GO:0003723	F:RNA binding
TRUE	INTERPRO	g28451.t1		362									IPR024738 (PFAM)	C:GO:0070461	C:SAGA-type complex
TRUE	INTERPRO	g3948.t1		322									IPR001005 (PFAM)	no GO terms	no GO terms
TRUE	INTERPRO	g44100.t1		824									IPR013103 (PFAM); IPR002156 (PFAM)	F:GO:0003676; F:GO:0004523	F:nucleic acid binding; F:RNA-DNA hybrid ribonuclease activity
TRUE	INTERPRO	g27399.t1		265									IPR033443 (PFAM)	no GO terms	no GO terms
TRUE	INTERPRO	g6568.t1		108									no IPS match	no IPS match	no IPS match
TRUE	INTERPRO	g2773.t1		262									IPR002016 (PFAM)	P:GO:0006979; P:GO:0055114; F:GO:0004601; F:GO:0020037	P:response to oxidative stress; P:obsolete oxidation-reduction process; F:peroxidase activity; F:heme binding
TRUE	INTERPRO	g15569.t1		299									IPR000719 (PFAM)	P:GO:0006468; F:GO:0004672; F:GO:0005524	P:protein phosphorylation; F:protein kinase activity; F:ATP binding
TRUE	INTERPRO	g5908.t1		671									IPR002156 (PFAM); IPR014946 (PFAM); IPR013103 (PFAM)	F:GO:0003676; F:GO:0004523	F:nucleic acid binding; F:RNA-DNA hybrid ribonuclease activity
TRUE	INTERPRO	g27548.t1		338									PF14223 (PFAM); IPR007271 (PFAM); IPR001878 (PFAM)	P:GO:0008643; F:GO:0003676; F:GO:0005351; F:GO:0008270; C:GO:0000139; C:GO:0016020	P:carbohydrate transport; F:nucleic acid binding; F:carbohydrate:proton symporter activity; F:zinc ion binding; C:Golgi membrane; C:membrane
TRUE	INTERPRO	g6800.t1		253									IPR001356 (PFAM); IPR003106 (PFAM)	P:GO:0006355; F:GO:0003677; F:GO:0003700; F:GO:0043565	P:regulation of DNA-templated transcription; F:DNA binding; F:DNA-binding transcription factor activity; F:sequence-specific DNA binding
TRUE	INTERPRO	g14405.t1		565									IPR005202 (PFAM)	no GO terms	no GO terms
TRUE	INTERPRO	g44851.t1		416									IPR004263 (PFAM)	no GO terms	no GO terms
TRUE	INTERPRO	g32317.t1		691									IPR000719 (PFAM)	P:GO:0006468; F:GO:0004672; F:GO:0005524	P:protein phosphorylation; F:protein kinase activity; F:ATP binding
TRUE	INTERPRO	g36361.t1		360									IPR013201 (PFAM); IPR000668 (PFAM)	P:GO:0006508; F:GO:0008234	P:proteolysis; F:cysteine-type peptidase activity
TRUE	INTERPRO	g3070.t1		523									PF13410 (PFAM); IPR006461 (PFAM); IPR021369 (PFAM)	no GO terms	no GO terms
TRUE	INTERPRO	g6578.t1		778									IPR008906 (PFAM); IPR007021 (PFAM); IPR025525 (PFAM); IPR003656 (PFAM)	F:GO:0003677; F:GO:0046983	F:DNA binding; F:protein dimerization activity
TRUE	INTERPRO	g32598.t1		428									IPR027353 (PFAM); IPR001487 (PFAM)	F:GO:0005515	F:protein binding
TRUE	INTERPRO	g27458.t1		195									IPR002877 (PFAM)	P:GO:0032259; F:GO:0008168	P:methylation; F:methyltransferase activity
TRUE	INTERPRO	g18390.t2		446									IPR000719 (PFAM)	P:GO:0006468; F:GO:0004672; F:GO:0005524	P:protein phosphorylation; F:protein kinase activity; F:ATP binding
TRUE	INTERPRO	g5232.t1		510									IPR025546 (PFAM)	no GO terms	no GO terms
TRUE	INTERPRO	g17300.t1		491									IPR002213 (PFAM); IPR028098 (PFAM); IPR002539 (PFAM)	P:GO:0008152; F:GO:0016758	P:metabolic process; F:hexosyltransferase activity
TRUE	INTERPRO	g28405.t1		527									IPR001471 (PFAM)	P:GO:0006355; F:GO:0003700	P:regulation of DNA-templated transcription; F:DNA-binding transcription factor activity
TRUE	INTERPRO	g18312.t1		353									no IPS match	no IPS match	no IPS match
TRUE	INTERPRO	g43123.t1		954									IPR001487 (PFAM); IPR022591 (PFAM); PF15288 (PFAM); IPR001387 (PFAM)	F:GO:0005515; F:GO:0043565	F:protein binding; F:sequence-specific DNA binding
TRUE	INTERPRO	g4546.t1		338									PF14223 (PFAM); IPR007671 (PFAM); IPR001878 (PFAM)	F:GO:0003676; F:GO:0008270	F:nucleic acid binding; F:zinc ion binding
TRUE	INTERPRO	g5385.t1		342									IPR001878 (PFAM); PF14223 (PFAM)	F:GO:0003676; F:GO:0008270	F:nucleic acid binding; F:zinc ion binding
TRUE	INTERPRO	g8956.t1		212									IPR025023 (PFAM); IPR004045 (PFAM); PF13410 (PFAM); IPR004045 (PFAM)	F:GO:0005515	F:protein binding
TRUE	INTERPRO	g5784.t2		799									IPR019167 (PFAM)	no GO terms	no GO terms
TRUE	INTERPRO	g4898.t1		338									PF14223 (PFAM); IPR001878 (PFAM)	F:GO:0003676; F:GO:0008270	F:nucleic acid binding; F:zinc ion binding
TRUE	INTERPRO	g6066.t1		403									IPR002885 (PFAM); IPR002885 (PFAM); IPR032071 (PFAM); IPR002885 (PFAM); PF13207 (PFAM); IPR010418 (PFAM)	no GO terms	no GO terms
TRUE	INTERPRO	g42606.t1		362									IPR000477 (PFAM)	no GO terms	no GO terms
TRUE	INTERPRO	g18844.t1		397									IPR007180 (PFAM); IPR010377 (PFAM); IPR007175 (PFAM); IPR008829 (PFAM); IPR001878 (PFAM); IPR025314 (PFAM); PF14223 (PFAM)	P:GO:0006260; F:GO:0003676; F:GO:0008270; F:GO:0016740; C:GO:0005634	P:DNA replication; F:nucleic acid binding; F:zinc ion binding; F:transferase activity; C:nucleus
TRUE	INTERPRO	g5298.t1		843									IPR008906 (PFAM); IPR025525 (PFAM); IPR003656 (PFAM); IPR007021 (PFAM)	F:GO:0003677; F:GO:0046983	F:DNA binding; F:protein dimerization activity
TRUE	INTERPRO	g17398.t2		279									IPR001878 (PFAM)	F:GO:0003676; F:GO:0008270	F:nucleic acid binding; F:zinc ion binding
TRUE	INTERPRO	g24943.t1		137									no IPS match	no IPS match	no IPS match
TRUE	INTERPRO	g28102.t1		400									IPR013210 (PFAM); IPR025875 (PFAM); IPR001611 (PFAM)	F:GO:0005515	F:protein binding
TRUE	INTERPRO	g30859.t1		165									IPR000008 (PFAM)	F:GO:0005515	F:protein binding
TRUE	INTERPRO	g11287.t1		503									IPR022383 (PFAM); IPR004255 (PFAM); IPR009721 (PFAM)	P:GO:0045017; P:GO:0055114; F:GO:0004144; F:GO:0016616	P:glycerolipid biosynthetic process; P:obsolete oxidation-reduction process; F:diacylglycerol O-acyltransferase activity; F:oxidoreductase activity, acting on the CH-OH group of donors, NAD or NADP as acceptor
TRUE	INTERPRO	g38138.t1		338									PF14223 (PFAM); IPR001878 (PFAM)	F:GO:0003676; F:GO:0008270	F:nucleic acid binding; F:zinc ion binding
TRUE	INTERPRO	g45758.t1		338									IPR007662 (PFAM); IPR025593 (PFAM); IPR025254 (PFAM); IPR005646 (PFAM); IPR013253 (PFAM); IPR023753 (PFAM); IPR024393 (PFAM); PF03148 (PFAM); IPR021398 (PFAM); IPR032498 (PFAM); IPR013890 (PFAM); IPR012458 (PFAM); IPR000533 (PFAM); PF06818 (PFAM)	P:GO:0048870; P:GO:0055114; F:GO:0016491; C:GO:0031514	P:cell motility; P:obsolete oxidation-reduction process; F:oxidoreductase activity; C:motile cilium
TRUE	INTERPRO	g10101.t1		922									IPR001584 (PFAM); IPR024599 (PFAM); IPR013103 (PFAM); IPR025724 (PFAM)	P:GO:0015074	P:DNA integration
TRUE	INTERPRO	g32959.t1		128									IPR001163 (PFAM)	no GO terms	no GO terms
TRUE	INTERPRO	g45011.t1		128									IPR001163 (PFAM)	no GO terms	no GO terms
TRUE	INTERPRO	g41135.t1		380									IPR001680 (PFAM)	F:GO:0005515	F:protein binding
TRUE	INTERPRO	g34128.t1		118									PF13881 (PFAM)	no GO terms	no GO terms
TRUE	INTERPRO	g20279.t1		657									IPR004240 (PFAM)	C:GO:0016020	C:membrane
TRUE	INTERPRO	g38081.t1		619									IPR004159 (PFAM)	F:GO:0008168	F:methyltransferase activity
TRUE	INTERPRO	g31488.t1		193									IPR006811 (PFAM)	P:GO:0006397; F:GO:0004721; C:GO:0005634	P:mRNA processing; F:phosphoprotein phosphatase activity; C:nucleus
TRUE	INTERPRO	g25010.t1		474									IPR000504 (PFAM)	F:GO:0003676	F:nucleic acid binding
TRUE	INTERPRO	g16166.t1		115									IPR033412 (PFAM)	no GO terms	no GO terms
TRUE	INTERPRO	g44562.t1		176									IPR000196 (PFAM)	P:GO:0006412; F:GO:0003735; C:GO:0005622; C:GO:0005840	P:translation; F:structural constituent of ribosome; C:intracellular anatomical structure; C:ribosome
TRUE	INTERPRO	g12411.t1		771									IPR003656 (PFAM); IPR008906 (PFAM); IPR010927 (PFAM); IPR025525 (PFAM)	F:GO:0003677; F:GO:0046983	F:DNA binding; F:protein dimerization activity
TRUE	INTERPRO	g14503.t1		505									IPR008906 (PFAM); IPR003656 (PFAM)	F:GO:0003677; F:GO:0046983	F:DNA binding; F:protein dimerization activity
TRUE	INTERPRO	g1719.t1		346									IPR013216 (PFAM); IPR013705 (PFAM); IPR007639 (PFAM)	P:GO:0006418; P:GO:0006694; P:GO:0008152; F:GO:0000166; F:GO:0004812; F:GO:0005524; F:GO:0008168; C:GO:0005737	P:tRNA aminoacylation for protein translation; P:steroid biosynthetic process; P:metabolic process; F:nucleotide binding; F:aminoacyl-tRNA ligase activity; F:ATP binding; F:methyltransferase activity; C:cytoplasm
TRUE	INTERPRO	g7167.t1		202									IPR008906 (PFAM)	F:GO:0046983	F:protein dimerization activity
TRUE	INTERPRO	g33511.t1		412									IPR010273 (PFAM); IPR013943 (PFAM)	P:GO:0000959; C:GO:0005739	P:mitochondrial RNA metabolic process; C:mitochondrion
TRUE	INTERPRO	g18008.t1		356									no IPS match	no IPS match	no IPS match
TRUE	INTERPRO	g1714.t1		165									IPR004207 (PFAM)	P:GO:0015979	P:photosynthesis
TRUE	INTERPRO	g5157.t1		215									IPR000424 (PFAM)	F:GO:0003697	F:single-stranded DNA binding
TRUE	INTERPRO	g19433.t1		356									no IPS match	no IPS match	no IPS match
TRUE	INTERPRO	g15318.t1		420									IPR005333 (PFAM)	no GO terms	no GO terms
TRUE	INTERPRO	g40595.t1		733									PF03999 (PFAM)	no GO terms	no GO terms
TRUE	INTERPRO	g34676.t1		197									IPR017956 (PFAM); IPR005818 (PFAM)	P:GO:0006334; F:GO:0003677; C:GO:0000786; C:GO:0005634	P:nucleosome assembly; F:DNA binding; C:nucleosome; C:nucleus
TRUE	INTERPRO	g25749.t1		584									IPR025314 (PFAM); PF14223 (PFAM); IPR001878 (PFAM)	F:GO:0003676; F:GO:0008270	F:nucleic acid binding; F:zinc ion binding
TRUE	INTERPRO	g24255.t1		338									IPR001878 (PFAM); PF14223 (PFAM)	F:GO:0003676; F:GO:0008270	F:nucleic acid binding; F:zinc ion binding
TRUE	INTERPRO	g8391.t1		310									IPR021213 (PFAM); IPR003754 (PFAM)	P:GO:0033014; F:GO:0004852	P:tetrapyrrole biosynthetic process; F:uroporphyrinogen-III synthase activity
TRUE	INTERPRO	g26474.t1		185									IPR007071 (PFAM); PF12874 (PFAM)	F:GO:0003677; C:GO:0005634	F:DNA binding; C:nucleus
TRUE	INTERPRO	g29271.t1		198									IPR000167 (PFAM)	P:GO:0006950; P:GO:0009415	P:response to stress; P:response to water
TRUE	INTERPRO	g33601.t1		128									no IPS match	no IPS match	no IPS match
TRUE	INTERPRO	g25982.t1		184									no IPS match	no IPS match	no IPS match
TRUE	INTERPRO	g9728.t2		176									IPR000361 (PFAM); IPR015380 (PFAM)	no GO terms	no GO terms
TRUE	INTERPRO	g20396.t1		108									no IPS match	no IPS match	no IPS match
TRUE	INTERPRO	g10294.t1		373									IPR023753 (PFAM); IPR009573 (PFAM)	P:GO:0055114; F:GO:0016491	P:obsolete oxidation-reduction process; F:oxidoreductase activity
TRUE	INTERPRO	g17506.t1		108									IPR001584 (PFAM); IPR026990 (PFAM)	P:GO:0015074	P:DNA integration
TRUE	INTERPRO	g28349.t1		338									IPR001878 (PFAM); PF14223 (PFAM)	F:GO:0003676; F:GO:0008270	F:nucleic acid binding; F:zinc ion binding
TRUE	INTERPRO	g28072.t1		233									IPR008906 (PFAM)	F:GO:0046983	F:protein dimerization activity
TRUE	INTERPRO	g24362.t2		565									IPR000109 (PFAM)	P:GO:0006810; F:GO:0005215; C:GO:0016020	P:transport; F:transporter activity; C:membrane
TRUE	INTERPRO	g6141.t1		393									no IPS match	no IPS match	no IPS match
TRUE	INTERPRO	g38660.t1		447									IPR025314 (PFAM); PF14223 (PFAM); IPR001878 (PFAM)	F:GO:0003676; F:GO:0008270	F:nucleic acid binding; F:zinc ion binding
TRUE	INTERPRO	g25837.t2		457									IPR005120 (PFAM)	no GO terms	no GO terms
TRUE	INTERPRO	g5893.t1		160									IPR000504 (PFAM)	F:GO:0003676	F:nucleic acid binding
TRUE	INTERPRO	g31400.t1		187									IPR001911 (PFAM)	P:GO:0006412; F:GO:0003735; C:GO:0005840	P:translation; F:structural constituent of ribosome; C:ribosome
TRUE	INTERPRO	g12770.t1		249									no IPS match	no IPS match	no IPS match
TRUE	INTERPRO	g16963.t1		909									IPR001024 (PFAM); IPR013819 (PFAM)	P:GO:0055114; F:GO:0005515; F:GO:0016702; F:GO:0046872	P:obsolete oxidation-reduction process; F:protein binding; F:oxidoreductase activity, acting on single donors with incorporation of molecular oxygen, incorporation of two atoms of oxygen; F:metal ion binding
TRUE	INTERPRO	g27748.t1		231									IPR008702 (PFAM); IPR000727 (PFAM); IPR011598 (PFAM)	F:GO:0005515; F:GO:0046983; C:GO:0019028	F:protein binding; F:protein dimerization activity; C:viral capsid
TRUE	INTERPRO	g6099.t1		612									IPR005630 (PFAM); IPR001906 (PFAM); IPR011495 (PFAM)	P:GO:0008152; F:GO:0000287; F:GO:0010333; F:GO:0016829	P:metabolic process; F:magnesium ion binding; F:terpene synthase activity; F:lyase activity
TRUE	INTERPRO	g13490.t1		143									IPR004864 (PFAM)	no GO terms	no GO terms
TRUE	INTERPRO	g41226.t1		783									IPR004088 (PFAM); IPR032741 (PFAM); PF13083 (PFAM)	F:GO:0003723; C:GO:0005743	F:RNA binding; C:mitochondrial inner membrane
TRUE	INTERPRO	g9383.t1		768									IPR003656 (PFAM); IPR007021 (PFAM); IPR025525 (PFAM); IPR008906 (PFAM)	F:GO:0003677; F:GO:0046983	F:DNA binding; F:protein dimerization activity
TRUE	INTERPRO	g18942.t1		164									IPR001356 (PFAM); IPR019518 (PFAM); IPR025925 (PFAM); IPR003106 (PFAM)	P:GO:0006355; F:GO:0003677; F:GO:0003700; F:GO:0043565	P:regulation of DNA-templated transcription; F:DNA binding; F:DNA-binding transcription factor activity; F:sequence-specific DNA binding
TRUE	INTERPRO	g31242.t1		345									IPR000109 (PFAM)	P:GO:0006810; F:GO:0005215; C:GO:0016020	P:transport; F:transporter activity; C:membrane
TRUE	INTERPRO	g16860.t1		189									no IPS match	no IPS match	no IPS match
TRUE	INTERPRO	g34119.t1		336									IPR008906 (PFAM); IPR025525 (PFAM)	F:GO:0003677; F:GO:0046983	F:DNA binding; F:protein dimerization activity
TRUE	INTERPRO	g46040.t1		226									IPR013822 (PFAM); IPR001670 (PFAM); IPR000897 (PFAM); PF13671 (PFAM)	P:GO:0006614; P:GO:0055114; F:GO:0005525; F:GO:0016491; F:GO:0046872	P:SRP-dependent cotranslational protein targeting to membrane; P:obsolete oxidation-reduction process; F:GTP binding; F:oxidoreductase activity; F:metal ion binding
TRUE	INTERPRO	g25202.t1		259									IPR005182 (PFAM)	no GO terms	no GO terms
TRUE	INTERPRO	g36750.t1		161									IPR013180 (PFAM)	no GO terms	no GO terms
TRUE	INTERPRO	g20036.t1		246									IPR000426 (PFAM); IPR001353 (PFAM)	P:GO:0006511; P:GO:0051603; F:GO:0004175; F:GO:0004298; C:GO:0005839; C:GO:0019773	P:ubiquitin-dependent protein catabolic process; P:proteolysis involved in protein catabolic process; F:endopeptidase activity; F:threonine-type endopeptidase activity; C:proteasome core complex; C:proteasome core complex, alpha-subunit complex
TRUE	INTERPRO	g33629.t1		353									no IPS match	no IPS match	no IPS match
TRUE	INTERPRO	g3215.t1		154									no IPS match	no IPS match	no IPS match
TRUE	INTERPRO	g36070.t1		122									IPR010279 (PFAM)	no GO terms	no GO terms
TRUE	INTERPRO	g21400.t1		510									IPR022673 (PFAM); IPR022672 (PFAM)	P:GO:0005975; F:GO:0005524; F:GO:0016773	P:carbohydrate metabolic process; F:ATP binding; F:phosphotransferase activity, alcohol group as acceptor
TRUE	INTERPRO	g29653.t1		502									IPR001251 (PFAM); IPR011074 (PFAM)	no GO terms	no GO terms
TRUE	INTERPRO	g4084.t1		148									IPR027923 (PFAM)	no GO terms	no GO terms
TRUE	INTERPRO	g25931.t1		658									IPR002885 (PFAM); IPR002885 (PFAM); PF13428 (PFAM); IPR002885 (PFAM); IPR032867 (PFAM); IPR031467 (PFAM)	P:GO:0006417; F:GO:0008270; F:GO:0045182	P:regulation of translation; F:zinc ion binding; F:translation regulator activity
TRUE	INTERPRO	g7672.t2		306									PF13561 (PFAM)	no GO terms	no GO terms
TRUE	INTERPRO	g19806.t1		250									IPR022796 (PFAM)	no GO terms	no GO terms
TRUE	INTERPRO	g2191.t1		476									IPR000477 (PFAM)	no GO terms	no GO terms
TRUE	INTERPRO	g39362.t1		411									IPR001547 (PFAM)	P:GO:0005975; F:GO:0004553	P:carbohydrate metabolic process; F:hydrolase activity, hydrolyzing O-glycosyl compounds
TRUE	INTERPRO	g30533.t1		301									IPR005162 (PFAM)	no GO terms	no GO terms
TRUE	INTERPRO	g16428.t1		1325									IPR001878 (PFAM); PF14223 (PFAM); IPR025724 (PFAM); IPR001584 (PFAM); IPR013103 (PFAM)	P:GO:0015074; F:GO:0003676; F:GO:0008270	P:DNA integration; F:nucleic acid binding; F:zinc ion binding
TRUE	INTERPRO	g3761.t1		1375									IPR025724 (PFAM); IPR013103 (PFAM); PF14223 (PFAM); IPR001584 (PFAM)	P:GO:0015074	P:DNA integration
TRUE	INTERPRO	g18625.t1		465									IPR002136 (PFAM); IPR007235 (PFAM); IPR002213 (PFAM)	P:GO:0006412; P:GO:0008152; F:GO:0003735; F:GO:0016758; C:GO:0005840	P:translation; P:metabolic process; F:structural constituent of ribosome; F:hexosyltransferase activity; C:ribosome
TRUE	INTERPRO	g8438.t1		974									IPR013989 (PFAM)	no GO terms	no GO terms
TRUE	INTERPRO	g16482.t1		168									IPR002068 (PFAM); IPR022594 (PFAM)	no GO terms	no GO terms
TRUE	INTERPRO	g11573.t1		358									no IPS match	no IPS match	no IPS match
TRUE	INTERPRO	g27750.t1		355									no IPS match	no IPS match	no IPS match
TRUE	INTERPRO	g41995.t1		223									no IPS match	no IPS match	no IPS match
TRUE	INTERPRO	g14977.t1		213									IPR005333 (PFAM)	no GO terms	no GO terms
TRUE	INTERPRO	g38657.t1		308									IPR000529 (PFAM); IPR018482 (PFAM)	P:GO:0006412; F:GO:0003735; F:GO:0019843; C:GO:0005840	P:translation; F:structural constituent of ribosome; F:rRNA binding; C:ribosome
TRUE	INTERPRO	g19883.t1		100									no IPS match	no IPS match	no IPS match
TRUE	INTERPRO	g13608.t1		339									PF14223 (PFAM); IPR001878 (PFAM)	F:GO:0003676; F:GO:0008270	F:nucleic acid binding; F:zinc ion binding
TRUE	INTERPRO	g13925.t1		199									IPR001584 (PFAM)	P:GO:0015074	P:DNA integration
TRUE	INTERPRO	g8978.t1		61									no IPS match	no IPS match	no IPS match
TRUE	INTERPRO	g19957.t1		401									IPR000477 (PFAM); IPR017956 (PFAM)	F:GO:0003677	F:DNA binding
TRUE	INTERPRO	g25833.t1		93									IPR009056 (PFAM); IPR032033 (PFAM)	F:GO:0009055; F:GO:0020037	F:electron transfer activity; F:heme binding
TRUE	INTERPRO	g33711.t1		261									no IPS match	no IPS match	no IPS match
TRUE	INTERPRO	g44994.t1		144									IPR000271 (PFAM)	P:GO:0006412; F:GO:0003735; C:GO:0005622; C:GO:0005840	P:translation; F:structural constituent of ribosome; C:intracellular anatomical structure; C:ribosome
TRUE	INTERPRO	g23122.t1		256									no IPS match	no IPS match	no IPS match
TRUE	INTERPRO	g26642.t1		110									IPR033461 (PFAM); IPR029242 (PFAM); IPR019655 (PFAM)	C:GO:0019031; C:GO:0042470	C:viral envelope; C:melanosome
TRUE	INTERPRO	g4139.t1		179									IPR011990 (PFAM); IPR002885 (PFAM)	F:GO:0005515	F:protein binding
TRUE	INTERPRO	g18376.t1		441									IPR000408 (PFAM); IPR026626 (PFAM)	C:GO:0005743; C:GO:0005747	C:mitochondrial inner membrane; C:obsolete mitochondrial respiratory chain complex I
TRUE	INTERPRO	g36448.t1		849									IPR018289 (PFAM); IPR007527 (PFAM); IPR004330 (PFAM); IPR006767 (PFAM)	F:GO:0008270	F:zinc ion binding
TRUE	INTERPRO	g13108.t1		208									IPR028105 (PFAM); IPR007246 (PFAM); IPR008521 (PFAM)	P:GO:0015693; F:GO:0015095; C:GO:0016020; C:GO:0042765	P:magnesium ion transport; F:magnesium ion transmembrane transporter activity; C:membrane; C:GPI-anchor transamidase complex
TRUE	INTERPRO	g42774.t1		318									IPR018872 (PFAM); IPR003657 (PFAM)	P:GO:0006355; F:GO:0003700; F:GO:0043565	P:regulation of DNA-templated transcription; F:DNA-binding transcription factor activity; F:sequence-specific DNA binding
TRUE	INTERPRO	g3135.t1		720									IPR002559 (PFAM); IPR004000 (PFAM)	P:GO:0006313; F:GO:0003677; F:GO:0004803	P:DNA transposition; F:DNA binding; F:transposase activity
TRUE	INTERPRO	g40259.t1		372									IPR000719 (PFAM)	P:GO:0006468; F:GO:0004672; F:GO:0005524	P:protein phosphorylation; F:protein kinase activity; F:ATP binding
TRUE	INTERPRO	g25947.t2		891									IPR006709 (PFAM)	P:GO:0006364; C:GO:0032040	P:rRNA processing; C:small-subunit processome
TRUE	INTERPRO	g34474.t1		748									IPR000330 (PFAM); IPR001650 (PFAM); IPR032438 (PFAM)	F:GO:0005524	F:ATP binding
TRUE	INTERPRO	g29430.t1		366									IPR024425 (PFAM)	no GO terms	no GO terms
TRUE	INTERPRO	g14216.t1		719									IPR013103 (PFAM)	no GO terms	no GO terms
TRUE	INTERPRO	g24391.t1		364									no IPS match	no IPS match	no IPS match
TRUE	INTERPRO	g36818.t1		964									IPR021135 (PFAM)	P:GO:0006099; P:GO:0015977; F:GO:0008964	P:tricarboxylic acid cycle; P:carbon fixation; F:phosphoenolpyruvate carboxylase activity
TRUE	INTERPRO	g33976.t1		595									IPR001005 (PFAM)	no GO terms	no GO terms
TRUE	INTERPRO	g29776.t1		831									IPR001480 (PFAM); IPR000719 (PFAM); IPR003609 (PFAM)	P:GO:0006468; F:GO:0004672; F:GO:0005524	P:protein phosphorylation; F:protein kinase activity; F:ATP binding
TRUE	INTERPRO	g31852.t1		210									IPR005518 (PFAM); IPR005366 (PFAM); IPR005516 (PFAM)	no GO terms	no GO terms
TRUE	INTERPRO	g42098.t1		172									IPR026960 (PFAM)	no GO terms	no GO terms
TRUE	INTERPRO	g15168.t1		969									IPR012935 (PFAM); IPR013909 (PFAM)	F:GO:0008270; C:GO:0005634	F:zinc ion binding; C:nucleus
TRUE	INTERPRO	g2207.t1		338									PF14223 (PFAM); IPR001878 (PFAM)	F:GO:0003676; F:GO:0008270	F:nucleic acid binding; F:zinc ion binding
TRUE	INTERPRO	g27633.t1		1052									IPR005554 (PFAM)	no GO terms	no GO terms
TRUE	INTERPRO	g16828.t1		241									IPR000477 (PFAM)	no GO terms	no GO terms
TRUE	INTERPRO	g40583.t1		168									no IPS match	no IPS match	no IPS match
TRUE	INTERPRO	g26996.t1		528									IPR024638 (PFAM); PF12352 (PFAM); IPR006903 (PFAM); IPR024957 (PFAM); IPR008398 (PFAM); IPR029389 (PFAM)	F:GO:0008017	F:microtubule binding
TRUE	INTERPRO	g15169.t2		232									IPR006702 (PFAM)	no GO terms	no GO terms
TRUE	INTERPRO	g4632.t1		1173									IPR013103 (PFAM); IPR025724 (PFAM); IPR001584 (PFAM)	P:GO:0015074	P:DNA integration
TRUE	INTERPRO	g37409.t1		442									IPR011701 (PFAM)	P:GO:0055085; C:GO:0016020	P:transmembrane transport; C:membrane
TRUE	INTERPRO	g42923.t1		638									IPR004147 (PFAM)	no GO terms	no GO terms
TRUE	INTERPRO	g33597.t1		440									IPR000644 (PFAM); IPR002550 (PFAM); IPR009494 (PFAM)	no GO terms	no GO terms
TRUE	INTERPRO	g23901.t1		543									IPR002156 (PFAM); IPR013103 (PFAM)	F:GO:0003676; F:GO:0004523	F:nucleic acid binding; F:RNA-DNA hybrid ribonuclease activity
TRUE	INTERPRO	g25228.t1		111									no IPS match	no IPS match	no IPS match
TRUE	INTERPRO	g45008.t1		136									IPR021765 (PFAM); IPR004697 (PFAM)	P:GO:1902604; F:GO:0015558	P:p-aminobenzoyl-glutamate transmembrane transport; F:secondary active p-aminobenzoyl-glutamate transmembrane transporter activity
TRUE	INTERPRO	g14190.t1		299									IPR011110 (PFAM); IPR018119 (PFAM); IPR001258 (PFAM)	P:GO:0009058; F:GO:0005515; F:GO:0016844	P:biosynthetic process; F:protein binding; F:strictosidine synthase activity
TRUE	INTERPRO	g36219.t1		493									IPR003128 (PFAM); IPR027806 (PFAM); IPR014208 (PFAM)	P:GO:0007010; F:GO:0003779	P:cytoskeleton organization; F:actin binding
TRUE	INTERPRO	g43395.t1		341									PF17067 (PFAM); IPR001878 (PFAM); PF14223 (PFAM)	F:GO:0003676; F:GO:0008270	F:nucleic acid binding; F:zinc ion binding
TRUE	INTERPRO	g43480.t1		147									IPR001041 (PFAM)	F:GO:0009055; F:GO:0051536	F:electron transfer activity; F:iron-sulfur cluster binding
TRUE	INTERPRO	g36067.t1		706									IPR000719 (PFAM)	P:GO:0006468; F:GO:0004672; F:GO:0005524	P:protein phosphorylation; F:protein kinase activity; F:ATP binding
TRUE	INTERPRO	g13978.t1		741									IPR005202 (PFAM); PF01946 (PFAM)	no GO terms	no GO terms
TRUE	INTERPRO	g8543.t1		677									IPR002659 (PFAM); IPR001079 (PFAM)	P:GO:0006486; F:GO:0008378; F:GO:0030246; C:GO:0016020	P:protein glycosylation; F:galactosyltransferase activity; F:carbohydrate binding; C:membrane
TRUE	INTERPRO	g4003.t1		526									IPR002885 (PFAM); IPR002885 (PFAM); IPR032867 (PFAM); IPR002885 (PFAM); IPR002885 (PFAM); PF13431 (PFAM)	F:GO:0008270	F:zinc ion binding
TRUE	INTERPRO	g25612.t1		198									IPR009945 (PFAM); IPR007405 (PFAM)	no GO terms	no GO terms
TRUE	INTERPRO	g13323.t1		615									IPR021264 (PFAM); PF04873 (PFAM)	no GO terms	no GO terms
TRUE	INTERPRO	g31620.t1		391									IPR000620 (PFAM)	C:GO:0016020; C:GO:0016020	C:membrane; C:membrane
TRUE	INTERPRO	g30955.t1		233									IPR008906 (PFAM)	F:GO:0046983	F:protein dimerization activity
TRUE	INTERPRO	g46007.t1		233									IPR008906 (PFAM)	F:GO:0046983	F:protein dimerization activity
TRUE	INTERPRO	g42685.t1		233									IPR008906 (PFAM)	F:GO:0046983	F:protein dimerization activity
TRUE	INTERPRO	g28910.t1		233									IPR008906 (PFAM)	F:GO:0046983	F:protein dimerization activity
TRUE	INTERPRO	g45801.t1		233									IPR008906 (PFAM)	F:GO:0046983	F:protein dimerization activity
TRUE	INTERPRO	g44320.t1		233									IPR008906 (PFAM)	F:GO:0046983	F:protein dimerization activity
TRUE	INTERPRO	g32546.t1		233									IPR008906 (PFAM)	F:GO:0046983	F:protein dimerization activity
TRUE	INTERPRO	g6426.t1		233									IPR008906 (PFAM)	F:GO:0046983	F:protein dimerization activity
TRUE	INTERPRO	g35382.t1		130									no IPS match	no IPS match	no IPS match
TRUE	INTERPRO	g25795.t1		493									IPR001680 (PFAM); IPR024977 (PFAM)	F:GO:0005515	F:protein binding
TRUE	INTERPRO	g21240.t1		392									IPR025723 (PFAM); IPR007678 (PFAM)	no GO terms	no GO terms
TRUE	INTERPRO	g42029.t1		108									no IPS match	no IPS match	no IPS match
TRUE	INTERPRO	g32061.t1		353									no IPS match	no IPS match	no IPS match
TRUE	INTERPRO	g5816.t1		458									IPR000504 (PFAM)	F:GO:0003676	F:nucleic acid binding
TRUE	INTERPRO	g2061.t1		338									IPR001878 (PFAM); PF14223 (PFAM)	F:GO:0003676; F:GO:0008270	F:nucleic acid binding; F:zinc ion binding
TRUE	INTERPRO	g44285.t1		156									no IPS match	no IPS match	no IPS match
TRUE	INTERPRO	g27582.t1		93									IPR013892 (PFAM); IPR033406 (PFAM); IPR018793 (PFAM); IPR013171 (PFAM)	P:GO:0009972; F:GO:0004126; F:GO:0008270	P:cytidine deamination; F:cytidine deaminase activity; F:zinc ion binding
TRUE	INTERPRO	g29167.t1		98									IPR015084 (PFAM)	P:GO:0055114; F:GO:0016638	P:obsolete oxidation-reduction process; F:oxidoreductase activity, acting on the CH-NH2 group of donors
TRUE	INTERPRO	g16683.t1		390									IPR023796 (PFAM); IPR002015 (PFAM)	no GO terms	no GO terms
TRUE	INTERPRO	g20407.t1		537									IPR021622 (PFAM); IPR018791 (PFAM); IPR007662 (PFAM); IPR022092 (PFAM); IPR013392 (PFAM); IPR031398 (PFAM); IPR019513 (PFAM); IPR028168 (PFAM); IPR031787 (PFAM); IPR013923 (PFAM); IPR013253 (PFAM); IPR012458 (PFAM); IPR021350 (PFAM); IPR000533 (PFAM)	P:GO:0010508; P:GO:0048309; P:GO:0051028; F:GO:0008134; F:GO:0042803; F:GO:0070840	P:positive regulation of autophagy; P:endoplasmic reticulum inheritance; P:mRNA transport; F:transcription factor binding; F:protein homodimerization activity; F:dynein complex binding
TRUE	INTERPRO	g6642.t1		916									IPR025875 (PFAM); IPR001611 (PFAM); IPR013210 (PFAM); IPR001611 (PFAM)	F:GO:0005515	F:protein binding
TRUE	INTERPRO	g3528.t1		584									IPR026961 (PFAM); IPR018746 (PFAM); IPR021799 (PFAM); IPR005169 (PFAM); IPR010605 (PFAM); IPR002110 (PFAM); IPR011711 (PFAM); IPR010445 (PFAM); IPR012476 (PFAM); IPR020683 (PFAM); IPR004131 (PFAM)	P:GO:0016973; P:GO:1902600; F:GO:0004427; F:GO:0005515; F:GO:0009678; C:GO:0005643; C:GO:0005886; C:GO:0016020	P:poly(A)+ mRNA export from nucleus; P:proton transmembrane transport; F:inorganic diphosphate phosphatase activity; F:protein binding; F:diphosphate hydrolysis-driven proton transmembrane transporter activity; C:nuclear pore; C:plasma membrane; C:membrane
TRUE	INTERPRO	g39516.t1		364									PF12826 (PFAM); IPR024084 (PFAM)	P:GO:0055114; F:GO:0016616	P:obsolete oxidation-reduction process; F:oxidoreductase activity, acting on the CH-OH group of donors, NAD or NADP as acceptor
TRUE	INTERPRO	g11266.t2		323									IPR032266 (PFAM)	no GO terms	no GO terms
TRUE	INTERPRO	g40012.t1		355									IPR022082 (PFAM)	no GO terms	no GO terms
TRUE	INTERPRO	g23216.t1		1342									IPR025724 (PFAM); PF14223 (PFAM); IPR001584 (PFAM); IPR027895 (PFAM); IPR025314 (PFAM); IPR013103 (PFAM)	P:GO:0015074	P:DNA integration
TRUE	INTERPRO	g14214.t1		618									PF13646 (PFAM); IPR000225 (PFAM); IPR022125 (PFAM)	F:GO:0005515	F:protein binding
TRUE	INTERPRO	g8696.t1		1547									IPR000477 (PFAM); IPR001584 (PFAM); IPR013253 (PFAM); IPR023780 (PFAM); IPR001878 (PFAM); IPR025593 (PFAM); IPR005162 (PFAM); IPR024675 (PFAM); IPR012929 (PFAM); IPR015416 (PFAM); IPR021570 (PFAM); IPR000074 (PFAM); PF13975 (PFAM)	P:GO:0006606; P:GO:0006869; P:GO:0015074; P:GO:0042157; P:GO:0048870; F:GO:0003676; F:GO:0008270; F:GO:0008289; C:GO:0005576; C:GO:0031514	P:protein import into nucleus; P:lipid transport; P:DNA integration; P:lipoprotein metabolic process; P:cell motility; F:nucleic acid binding; F:zinc ion binding; F:lipid binding; C:extracellular region; C:motile cilium
TRUE	INTERPRO	g4970.t1		100									no IPS match	no IPS match	no IPS match
TRUE	INTERPRO	g19167.t1		396									no IPS match	no IPS match	no IPS match
TRUE	INTERPRO	g3468.t1		342									IPR001878 (PFAM); PF14223 (PFAM)	F:GO:0003676; F:GO:0008270	F:nucleic acid binding; F:zinc ion binding
TRUE	INTERPRO	g3827.t1		249									IPR000679 (PFAM)	P:GO:0006355; F:GO:0003700; F:GO:0008270; F:GO:0043565	P:regulation of DNA-templated transcription; F:DNA-binding transcription factor activity; F:zinc ion binding; F:sequence-specific DNA binding
TRUE	INTERPRO	g24948.t2		754									IPR005150 (PFAM)	P:GO:0030244; F:GO:0016760; C:GO:0016020	P:cellulose biosynthetic process; F:cellulose synthase (UDP-forming) activity; C:membrane
TRUE	INTERPRO	g307.t1		369									IPR004367 (PFAM); IPR006671 (PFAM)	C:GO:0005634	C:nucleus
TRUE	INTERPRO	g6338.t1		380									IPR007927 (PFAM); IPR022182 (PFAM)	P:GO:0006817	P:phosphate ion transport
TRUE	INTERPRO	g28753.t1		223									IPR001353 (PFAM)	P:GO:0051603; F:GO:0004298; C:GO:0005839	P:proteolysis involved in protein catabolic process; F:threonine-type endopeptidase activity; C:proteasome core complex
TRUE	INTERPRO	g10719.t1		593									IPR003611 (PFAM)	F:GO:0003677	F:DNA binding
TRUE	INTERPRO	g42522.t1		1227									IPR013194 (PFAM); IPR003822 (PFAM); IPR031693 (PFAM)	P:GO:0006355	P:regulation of DNA-templated transcription
TRUE	INTERPRO	g22646.t1		820									IPR027414 (PFAM); IPR011990 (PFAM)	F:GO:0005515	F:protein binding
TRUE	INTERPRO	g27659.t1		462									IPR025525 (PFAM); IPR007312 (PFAM); IPR008906 (PFAM)	F:GO:0003677; F:GO:0016788; F:GO:0046983	F:DNA binding; F:hydrolase activity, acting on ester bonds; F:protein dimerization activity
TRUE	INTERPRO	g42974.t1		313									IPR003656 (PFAM)	F:GO:0003677	F:DNA binding
TRUE	INTERPRO	g3881.t1		658									IPR000253 (PFAM); IPR010347 (PFAM)	P:GO:0006281; F:GO:0005515; F:GO:0008081; C:GO:0005634	P:DNA repair; F:protein binding; F:phosphoric diester hydrolase activity; C:nucleus
TRUE	INTERPRO	g12610.t1		320									no IPS match	no IPS match	no IPS match
TRUE	INTERPRO	g8526.t1		223									IPR000462 (PFAM)	P:GO:0008654; F:GO:0016780; C:GO:0016020	P:phospholipid biosynthetic process; F:phosphotransferase activity, for other substituted phosphate groups; C:membrane
TRUE	INTERPRO	g21124.t1		1126									IPR025724 (PFAM); IPR013103 (PFAM); IPR001584 (PFAM)	P:GO:0015074	P:DNA integration
TRUE	INTERPRO	g1452.t1		545									IPR002423 (PFAM); IPR010537 (PFAM)	F:GO:0005524	F:ATP binding
TRUE	INTERPRO	g27423.t1		338									PF14223 (PFAM); IPR007271 (PFAM); IPR001878 (PFAM); IPR007671 (PFAM)	P:GO:0008643; F:GO:0003676; F:GO:0005351; F:GO:0008270; C:GO:0000139; C:GO:0016020	P:carbohydrate transport; F:nucleic acid binding; F:carbohydrate:proton symporter activity; F:zinc ion binding; C:Golgi membrane; C:membrane
TRUE	INTERPRO	g11131.t1		462									IPR004324 (PFAM)	P:GO:0006810; C:GO:0016020	P:transport; C:membrane
TRUE	INTERPRO	g14994.t1		234									IPR000770 (PFAM)	F:GO:0003677	F:DNA binding
TRUE	INTERPRO	g10399.t1		275									IPR005175 (PFAM); IPR021769 (PFAM)	no GO terms	no GO terms
TRUE	INTERPRO	g15704.t1		547									IPR014720 (PFAM); PF14709 (PFAM)	no GO terms	no GO terms
TRUE	INTERPRO	g13333.t1		250									IPR008906 (PFAM)	F:GO:0046983	F:protein dimerization activity
TRUE	INTERPRO	g19365.t1		196									IPR021356 (PFAM); IPR021422 (PFAM); IPR007701 (PFAM)	no GO terms	no GO terms
TRUE	INTERPRO	g23469.t1		1165									IPR001584 (PFAM); IPR025724 (PFAM); IPR013103 (PFAM)	P:GO:0015074	P:DNA integration
TRUE	INTERPRO	g35195.t1		122									no IPS match	no IPS match	no IPS match
TRUE	INTERPRO	g43165.t1		501									IPR001841 (PFAM)	F:GO:0005515; F:GO:0008270	F:protein binding; F:zinc ion binding
TRUE	INTERPRO	g45142.t1		129									IPR002146 (PFAM); IPR031581 (PFAM); IPR022065 (PFAM)	P:GO:0006874; P:GO:0015986; F:GO:0015078; F:GO:0030234; C:GO:0030176; C:GO:0045263	P:intracellular calcium ion homeostasis; P:proton motive force-driven ATP synthesis; F:proton transmembrane transporter activity; F:enzyme regulator activity; C:obsolete integral component of endoplasmic reticulum membrane; C:proton-transporting ATP synthase complex, coupling factor F(o)
TRUE	INTERPRO	g9329.t1		796									IPR002575 (PFAM); IPR000719 (PFAM); IPR006016 (PFAM)	P:GO:0006468; P:GO:0006950; F:GO:0004672; F:GO:0005524	P:protein phosphorylation; P:response to stress; F:protein kinase activity; F:ATP binding
TRUE	INTERPRO	g9390.t1		360									no IPS match	no IPS match	no IPS match
TRUE	INTERPRO	g17101.t1		1325									IPR001878 (PFAM); IPR025724 (PFAM); IPR013103 (PFAM); IPR001584 (PFAM); PF14223 (PFAM)	P:GO:0015074; F:GO:0003676; F:GO:0008270	P:DNA integration; F:nucleic acid binding; F:zinc ion binding
TRUE	INTERPRO	g43837.t1		447									IPR025314 (PFAM); PF14223 (PFAM); IPR001878 (PFAM)	F:GO:0003676; F:GO:0008270	F:nucleic acid binding; F:zinc ion binding
TRUE	INTERPRO	g31153.t1		783									IPR031852 (PFAM); IPR009579 (PFAM); IPR022788 (PFAM); IPR001752 (PFAM)	P:GO:0007018; F:GO:0003777; F:GO:0005524; F:GO:0008017	P:microtubule-based movement; F:microtubule motor activity; F:ATP binding; F:microtubule binding
TRUE	INTERPRO	g22423.t1		88									IPR029236 (PFAM)	no GO terms	no GO terms
TRUE	INTERPRO	g9541.t1		547									PF14223 (PFAM); IPR003106 (PFAM)	P:GO:0006355; F:GO:0003700; F:GO:0043565	P:regulation of DNA-templated transcription; F:DNA-binding transcription factor activity; F:sequence-specific DNA binding
TRUE	INTERPRO	g44939.t1		260									IPR007197 (PFAM); IPR010722 (PFAM)	F:GO:0003824; F:GO:0051536	F:catalytic activity; F:iron-sulfur cluster binding
TRUE	INTERPRO	g1910.t1		1477									IPR022812 (PFAM); IPR006703 (PFAM); IPR002645 (PFAM); IPR024283 (PFAM); IPR003439 (PFAM); IPR010914 (PFAM)	F:GO:0003924; F:GO:0005524; F:GO:0005525; F:GO:0016887	F:GTPase activity; F:ATP binding; F:GTP binding; F:ATP hydrolysis activity
TRUE	INTERPRO	g21633.t1		307									IPR013210 (PFAM); IPR001611 (PFAM); IPR001611 (PFAM)	F:GO:0005515	F:protein binding
TRUE	INTERPRO	g25287.t1		136									IPR021899 (PFAM); IPR003961 (PFAM)	F:GO:0005515	F:protein binding
TRUE	INTERPRO	g15369.t1		520									IPR006073 (PFAM); PF00009 (PFAM); IPR012971 (PFAM); IPR007160 (PFAM)	F:GO:0005525	F:GTP binding
TRUE	INTERPRO	g37843.t1		355									IPR013149 (PFAM); IPR013154 (PFAM)	P:GO:0055114	P:obsolete oxidation-reduction process
TRUE	INTERPRO	g42202.t1		347									IPR013094 (PFAM)	P:GO:0008152; F:GO:0016787	P:metabolic process; F:hydrolase activity
TRUE	INTERPRO	g44203.t1		1110									IPR001650 (PFAM); IPR025402 (PFAM); IPR000330 (PFAM); IPR022752 (PFAM); IPR029295 (PFAM)	F:GO:0003700; F:GO:0005524; F:GO:0042393	F:DNA-binding transcription factor activity; F:ATP binding; F:histone binding
TRUE	INTERPRO	g43949.t1		306									IPR002156 (PFAM); IPR013103 (PFAM)	F:GO:0003676; F:GO:0004523	F:nucleic acid binding; F:RNA-DNA hybrid ribonuclease activity
TRUE	INTERPRO	g38223.t1		405									IPR019536 (PFAM); IPR007285 (PFAM); IPR000232 (PFAM); IPR007801 (PFAM)	P:GO:0006355; F:GO:0003700; F:GO:0043565; C:GO:0005634	P:regulation of DNA-templated transcription; F:DNA-binding transcription factor activity; F:sequence-specific DNA binding; C:nucleus
TRUE	INTERPRO	g2707.t1		341									IPR018108 (PFAM)	no GO terms	no GO terms
TRUE	INTERPRO	g11978.t1		319									IPR028039 (PFAM); IPR001753 (PFAM)	P:GO:0008152; F:GO:0003824	P:metabolic process; F:catalytic activity
TRUE	INTERPRO	g35970.t1		504									IPR025852 (PFAM); IPR009818 (PFAM)	no GO terms	no GO terms
TRUE	INTERPRO	g33421.t1		126									no IPS match	no IPS match	no IPS match
TRUE	INTERPRO	g12751.t1		131									no IPS match	no IPS match	no IPS match
TRUE	INTERPRO	g1366.t1		338									IPR001878 (PFAM); PF14223 (PFAM)	F:GO:0003676; F:GO:0008270	F:nucleic acid binding; F:zinc ion binding
TRUE	INTERPRO	g17040.t1		511									IPR001810 (PFAM); IPR003347 (PFAM); PF13621 (PFAM); IPR001810 (PFAM)	F:GO:0005515	F:protein binding
TRUE	INTERPRO	g3798.t1		574									IPR024478 (PFAM); IPR001878 (PFAM); PF14223 (PFAM); IPR004125 (PFAM); IPR001878 (PFAM); IPR002481 (PFAM); IPR022043 (PFAM)	P:GO:0006355; P:GO:0006614; F:GO:0003676; F:GO:0003700; F:GO:0008270; F:GO:0008312; C:GO:0048500	P:regulation of DNA-templated transcription; P:SRP-dependent cotranslational protein targeting to membrane; F:nucleic acid binding; F:DNA-binding transcription factor activity; F:zinc ion binding; F:7S RNA binding; C:signal recognition particle
TRUE	INTERPRO	g23282.t1		421									PF14559 (PFAM); IPR013105 (PFAM); IPR032076 (PFAM); IPR001440 (PFAM); IPR011990 (PFAM)	F:GO:0005515	F:protein binding
TRUE	INTERPRO	g16600.t1		111									IPR004861 (PFAM)	no GO terms	no GO terms
TRUE	INTERPRO	g25130.t1		367									IPR023210 (PFAM); IPR008565 (PFAM)	no GO terms	no GO terms
TRUE	INTERPRO	g37139.t1		338									PF14223 (PFAM); IPR001878 (PFAM)	F:GO:0003676; F:GO:0008270	F:nucleic acid binding; F:zinc ion binding
TRUE	INTERPRO	g19619.t1		342									IPR013094 (PFAM)	P:GO:0008152; F:GO:0016787	P:metabolic process; F:hydrolase activity
TRUE	INTERPRO	g11537.t1		536									IPR001878 (PFAM); PF14223 (PFAM); IPR025314 (PFAM); IPR001878 (PFAM); IPR028263 (PFAM)	F:GO:0003676; F:GO:0008270	F:nucleic acid binding; F:zinc ion binding
TRUE	INTERPRO	g27994.t1		98									no IPS match	no IPS match	no IPS match
TRUE	INTERPRO	g11242.t1		231									IPR000504 (PFAM)	F:GO:0003676	F:nucleic acid binding
TRUE	INTERPRO	g41631.t1		576									PF13917 (PFAM); IPR025314 (PFAM); IPR005646 (PFAM); IPR028933 (PFAM); PF14223 (PFAM); IPR001878 (PFAM); IPR019357 (PFAM); IPR032486 (PFAM)	F:GO:0003676; F:GO:0008270	F:nucleic acid binding; F:zinc ion binding
TRUE	INTERPRO	g27152.t1		247									IPR019130 (PFAM); IPR007357 (PFAM)	C:GO:0016020	C:membrane
TRUE	INTERPRO	g32954.t1		336									IPR004252 (PFAM); IPR013570 (PFAM)	no GO terms	no GO terms
TRUE	INTERPRO	g30608.t1		190									IPR003397 (PFAM)	no GO terms	no GO terms
TRUE	INTERPRO	g35258.t1		334									IPR005647 (PFAM); IPR001578 (PFAM); PF14966 (PFAM); IPR012471 (PFAM); IPR002017 (PFAM); PF13476 (PFAM)	P:GO:0006511; F:GO:0004843; F:GO:0005515; C:GO:0005622	P:ubiquitin-dependent protein catabolic process; F:cysteine-type deubiquitinase activity; F:protein binding; C:intracellular anatomical structure
TRUE	INTERPRO	g44083.t1		437									IPR003106 (PFAM); PF14223 (PFAM); IPR025314 (PFAM); IPR001878 (PFAM); IPR005632 (PFAM); IPR010377 (PFAM)	P:GO:0006260; P:GO:0006355; F:GO:0003676; F:GO:0003700; F:GO:0008270; F:GO:0043565; F:GO:0051082	P:DNA replication; P:regulation of DNA-templated transcription; F:nucleic acid binding; F:DNA-binding transcription factor activity; F:zinc ion binding; F:sequence-specific DNA binding; F:unfolded protein binding
TRUE	INTERPRO	g11308.t1		260									IPR004316 (PFAM); IPR000715 (PFAM); IPR018677 (PFAM); IPR025635 (PFAM)	F:GO:0008963; C:GO:0016020	F:phospho-N-acetylmuramoyl-pentapeptide-transferase activity; C:membrane
TRUE	INTERPRO	g1675.t1		177									IPR000058 (PFAM); IPR002653 (PFAM)	F:GO:0003677; F:GO:0008270	F:DNA binding; F:zinc ion binding
TRUE	INTERPRO	g32720.t1		103									IPR000008 (PFAM)	F:GO:0005515	F:protein binding
TRUE	INTERPRO	g2128.t3		468									IPR002075 (PFAM); IPR000504 (PFAM)	P:GO:0006810; F:GO:0003676; C:GO:0005622	P:transport; F:nucleic acid binding; C:intracellular anatomical structure
TRUE	INTERPRO	g30664.t1		108									no IPS match	no IPS match	no IPS match
TRUE	INTERPRO	g17424.t1		1169									IPR001584 (PFAM); IPR013103 (PFAM); IPR025724 (PFAM)	P:GO:0015074	P:DNA integration
TRUE	INTERPRO	g39161.t1		264									IPR007157 (PFAM)	no GO terms	no GO terms
TRUE	INTERPRO	g15885.t1		1080									IPR025724 (PFAM); IPR001584 (PFAM); IPR013103 (PFAM)	P:GO:0015074	P:DNA integration
TRUE	INTERPRO	g31874.t1		852									PF01803 (PFAM); PF05806 (PFAM)	no GO terms	no GO terms
TRUE	INTERPRO	g43207.t1		177									IPR002048 (PFAM); IPR002864 (PFAM); IPR002048 (PFAM)	P:GO:0006633; F:GO:0005509; F:GO:0016790	P:fatty acid biosynthetic process; F:calcium ion binding; F:thiolester hydrolase activity
TRUE	INTERPRO	g42243.t1		592									IPR019050 (PFAM); IPR025609 (PFAM)	no GO terms	no GO terms
TRUE	INTERPRO	g39994.t2		805									IPR025486 (PFAM); IPR032795 (PFAM)	no GO terms	no GO terms
TRUE	INTERPRO	g27415.t1		1266									IPR018979 (PFAM); PF01583 (PFAM); PF13558 (PFAM); IPR003439 (PFAM); PF13207 (PFAM); IPR011527 (PFAM)	P:GO:0006810; P:GO:0055085; F:GO:0005524; F:GO:0016887; F:GO:0042626; C:GO:0016020	P:transport; P:transmembrane transport; F:ATP binding; F:ATP hydrolysis activity; F:ATPase-coupled transmembrane transporter activity; C:membrane
TRUE	INTERPRO	g18449.t1		771									IPR019156 (PFAM); IPR007630 (PFAM); IPR003613 (PFAM); PF05804 (PFAM); IPR000225 (PFAM)	P:GO:0006352; P:GO:0006355; P:GO:0016567; F:GO:0003677; F:GO:0003700; F:GO:0004842; F:GO:0005515; F:GO:0016987	P:DNA-templated transcription initiation; P:regulation of DNA-templated transcription; P:protein ubiquitination; F:DNA binding; F:DNA-binding transcription factor activity; F:ubiquitin-protein transferase activity; F:protein binding; F:sigma factor activity
TRUE	INTERPRO	g7318.t1		354									IPR000504 (PFAM)	F:GO:0003676	F:nucleic acid binding
TRUE	INTERPRO	g4357.t1		673									IPR004152 (PFAM); IPR021119 (PFAM); IPR002014 (PFAM); IPR022542 (PFAM)	P:GO:0006886; C:GO:0005622	P:intracellular protein transport; C:intracellular anatomical structure
TRUE	INTERPRO	g33830.t1		319									IPR001509 (PFAM)	F:GO:0003824; F:GO:0050662	F:catalytic activity; F:obsolete coenzyme binding
TRUE	INTERPRO	g43807.t1		272									IPR000477 (PFAM)	no GO terms	no GO terms
TRUE	INTERPRO	g9450.t1		120									no IPS match	no IPS match	no IPS match
TRUE	INTERPRO	g14970.t1		463									no IPS match	no IPS match	no IPS match
TRUE	INTERPRO	g3565.t1		335									IPR001173 (PFAM)	no GO terms	no GO terms
TRUE	INTERPRO	g10316.t1		108									no IPS match	no IPS match	no IPS match
TRUE	INTERPRO	g21772.t1		412									IPR003205 (PFAM); IPR007657 (PFAM)	F:GO:0004129; F:GO:0016757	F:cytochrome-c oxidase activity; F:glycosyltransferase activity
TRUE	INTERPRO	g41778.t1		605									IPR008764 (PFAM); IPR015425 (PFAM); IPR007656 (PFAM)	no GO terms	no GO terms
TRUE	INTERPRO	g7725.t1		168									IPR028945 (PFAM); IPR006578 (PFAM); PF05873 (PFAM); IPR001107 (PFAM); IPR008731 (PFAM)	P:GO:0009401; P:GO:0071816	P:phosphoenolpyruvate-dependent sugar phosphotransferase system; P:tail-anchored membrane protein insertion into ER membrane
TRUE	INTERPRO	g24691.t1		217									PF13456 (PFAM)	no GO terms	no GO terms
TRUE	INTERPRO	g31897.t1		438									IPR001915 (PFAM)	P:GO:0006508; F:GO:0004222	P:proteolysis; F:metalloendopeptidase activity
TRUE	INTERPRO	g28630.t1		1170									IPR001584 (PFAM); IPR013103 (PFAM); IPR025724 (PFAM)	P:GO:0015074	P:DNA integration
TRUE	INTERPRO	g24380.t1		462									IPR008906 (PFAM); IPR025525 (PFAM)	F:GO:0003677; F:GO:0046983	F:DNA binding; F:protein dimerization activity
TRUE	INTERPRO	g9130.t1		437									IPR000719 (PFAM)	P:GO:0006468; F:GO:0004672; F:GO:0005524	P:protein phosphorylation; F:protein kinase activity; F:ATP binding
TRUE	INTERPRO	g13773.t1		338									PF14223 (PFAM); IPR001878 (PFAM)	F:GO:0003676; F:GO:0008270	F:nucleic acid binding; F:zinc ion binding
TRUE	INTERPRO	g4490.t1		421									IPR002259 (PFAM); IPR025196 (PFAM)	P:GO:0006810; F:GO:0005337; C:GO:0016020	P:transport; F:nucleoside transmembrane transporter activity; C:membrane
TRUE	INTERPRO	g31125.t1		536									IPR029329 (PFAM); IPR033436 (PFAM); IPR002495 (PFAM)	F:GO:0016757	F:glycosyltransferase activity
TRUE	INTERPRO	g20461.t1		224									IPR002100 (PFAM); IPR029384 (PFAM); IPR002487 (PFAM)	P:GO:0006355; F:GO:0003677; F:GO:0003700; F:GO:0046983; C:GO:0005634	P:regulation of DNA-templated transcription; F:DNA binding; F:DNA-binding transcription factor activity; F:protein dimerization activity; C:nucleus
TRUE	INTERPRO	g17688.t1		339									IPR024319 (PFAM); IPR020126 (PFAM); IPR002885 (PFAM); IPR002885 (PFAM)	no GO terms	no GO terms
TRUE	INTERPRO	g19400.t1		602									IPR004159 (PFAM)	F:GO:0008168	F:methyltransferase activity
TRUE	INTERPRO	g35112.t1		630									IPR009861 (PFAM); IPR010445 (PFAM); IPR025287 (PFAM); IPR001245 (PFAM)	P:GO:0006468; P:GO:0014068; P:GO:0050776; F:GO:0004672; F:GO:0005102; F:GO:0030247; F:GO:0043548; C:GO:0005886; C:GO:0016020	P:protein phosphorylation; P:obsolete positive regulation of phosphatidylinositol 3-kinase signaling; P:regulation of immune response; F:protein kinase activity; F:signaling receptor binding; F:polysaccharide binding; F:phosphatidylinositol 3-kinase binding; C:plasma membrane; C:membrane
TRUE	INTERPRO	g27642.t1		412									IPR021916 (PFAM); IPR001810 (PFAM); IPR000007 (PFAM)	F:GO:0005515	F:protein binding
TRUE	INTERPRO	g30438.t1		503									IPR001810 (PFAM); IPR001611 (PFAM)	F:GO:0005515	F:protein binding
TRUE	INTERPRO	g23723.t1		564									IPR032422 (PFAM); IPR018699 (PFAM); PF06818 (PFAM); IPR015260 (PFAM); PF14223 (PFAM); IPR025314 (PFAM); IPR001878 (PFAM); PF08700 (PFAM); IPR007255 (PFAM); IPR021611 (PFAM); IPR010377 (PFAM); IPR007793 (PFAM)	P:GO:0006260; P:GO:0048193; F:GO:0003676; F:GO:0008270; C:GO:0016020; C:GO:0017119	P:DNA replication; P:Golgi vesicle transport; F:nucleic acid binding; F:zinc ion binding; C:membrane; C:Golgi transport complex
TRUE	INTERPRO	g41348.t1		980									IPR002999 (PFAM); IPR016071 (PFAM)	no GO terms	no GO terms
TRUE	INTERPRO	g46166.t1		282									IPR001107 (PFAM)	no GO terms	no GO terms
TRUE	INTERPRO	g9567.t1		141									IPR008700 (PFAM)	no GO terms	no GO terms
TRUE	INTERPRO	g24685.t1		195									IPR022030 (PFAM); IPR027934 (PFAM); IPR001293 (PFAM)	F:GO:0008270	F:zinc ion binding
TRUE	INTERPRO	g26173.t1		575									IPR001623 (PFAM); PF13848 (PFAM)	no GO terms	no GO terms
TRUE	INTERPRO	g710.t1		203									IPR003656 (PFAM)	F:GO:0003677	F:DNA binding
TRUE	INTERPRO	g43682.t1		153									IPR016072 (PFAM); IPR016073 (PFAM); IPR004038 (PFAM)	P:GO:0006511	P:ubiquitin-dependent protein catabolic process
TRUE	INTERPRO	g43435.t1		338									PF14223 (PFAM); IPR001878 (PFAM)	F:GO:0003676; F:GO:0008270	F:nucleic acid binding; F:zinc ion binding
TRUE	INTERPRO	g31229.t1		695									IPR012938 (PFAM); IPR019903 (PFAM)	P:GO:0005975; F:GO:0016901; F:GO:0048038	P:carbohydrate metabolic process; F:oxidoreductase activity, acting on the CH-OH group of donors, quinone or similar compound as acceptor; F:quinone binding
TRUE	INTERPRO	g5198.t1		167									no IPS match	no IPS match	no IPS match
TRUE	INTERPRO	g36356.t1		296									no IPS match	no IPS match	no IPS match
TRUE	INTERPRO	g30380.t1		552									IPR009850 (PFAM); IPR008795 (PFAM); IPR010820 (PFAM); IPR026894 (PFAM); IPR018848 (PFAM); IPR007601 (PFAM); IPR015368 (PFAM); IPR012906 (PFAM); IPR015866 (PFAM)	F:GO:0005198; F:GO:0018024; C:GO:0016020; C:GO:0019028; C:GO:0019031	F:structural molecule activity; F:obsolete histone lysine N-methyltransferase activity; C:membrane; C:viral capsid; C:viral envelope
TRUE	INTERPRO	g9866.t1		110									IPR005336 (PFAM)	P:GO:0006850; C:GO:0005743	P:mitochondrial pyruvate transmembrane transport; C:mitochondrial inner membrane
TRUE	INTERPRO	g39099.t1		175									IPR005607 (PFAM)	no GO terms	no GO terms
TRUE	INTERPRO	g16760.t1		143									no IPS match	no IPS match	no IPS match
TRUE	INTERPRO	g14483.t1		259									IPR005162 (PFAM); IPR021735 (PFAM)	no GO terms	no GO terms
TRUE	INTERPRO	g11745.t1		615									IPR014805 (PFAM); IPR001611 (PFAM); IPR001611 (PFAM); IPR000719 (PFAM); IPR013210 (PFAM)	P:GO:0006468; F:GO:0004672; F:GO:0005515; F:GO:0005524	P:protein phosphorylation; F:protein kinase activity; F:protein binding; F:ATP binding
TRUE	INTERPRO	g31884.t1		440									IPR000571 (PFAM); IPR025666 (PFAM); IPR001680 (PFAM); PF15663 (PFAM)	F:GO:0005515; F:GO:0046872	F:protein binding; F:metal ion binding
TRUE	INTERPRO	g10356.t1		416									IPR020980 (PFAM); IPR001594 (PFAM)	no GO terms	no GO terms
TRUE	INTERPRO	g10356.t2		416									IPR020980 (PFAM); IPR001594 (PFAM)	no GO terms	no GO terms
TRUE	INTERPRO	g13046.t1		310									IPR005123 (PFAM); IPR026992 (PFAM)	P:GO:0055114; F:GO:0016491	P:obsolete oxidation-reduction process; F:oxidoreductase activity
TRUE	INTERPRO	g17914.t1		236									PF13717 (PFAM); IPR024442 (PFAM); IPR031538 (PFAM); IPR001841 (PFAM); IPR013429 (PFAM); IPR024766 (PFAM); IPR013134 (PFAM); IPR000688 (PFAM)	P:GO:0036211; F:GO:0005515; F:GO:0008270; F:GO:0016151	P:protein modification process; F:protein binding; F:zinc ion binding; F:nickel cation binding
TRUE	INTERPRO	g35246.t1		273									IPR001568 (PFAM)	F:GO:0003723; F:GO:0033897	F:RNA binding; F:ribonuclease T2 activity
TRUE	INTERPRO	g13519.t1		240									IPR007793 (PFAM); IPR021735 (PFAM); IPR019632 (PFAM)	no GO terms	no GO terms
TRUE	INTERPRO	g37156.t1		260									IPR029482 (PFAM); IPR026992 (PFAM); IPR005123 (PFAM)	P:GO:0055114; F:GO:0016491	P:obsolete oxidation-reduction process; F:oxidoreductase activity
TRUE	INTERPRO	g33232.t1		541									IPR011707 (PFAM); IPR027952 (PFAM); IPR011706 (PFAM); IPR001117 (PFAM)	P:GO:0055114; F:GO:0005507; F:GO:0016491	P:obsolete oxidation-reduction process; F:copper ion binding; F:oxidoreductase activity
TRUE	INTERPRO	g20350.t1		1325									IPR001878 (PFAM); IPR013103 (PFAM); PF14223 (PFAM); IPR025724 (PFAM); IPR001584 (PFAM)	P:GO:0015074; F:GO:0003676; F:GO:0008270	P:DNA integration; F:nucleic acid binding; F:zinc ion binding
TRUE	INTERPRO	g35756.t1		129									IPR004910 (PFAM); IPR019273 (PFAM); IPR000268 (PFAM)	P:GO:0006351; F:GO:0003677; F:GO:0003899	P:DNA-templated transcription; F:DNA binding; F:DNA-directed 5'-3' RNA polymerase activity
TRUE	INTERPRO	g22719.t1		418									IPR004776 (PFAM)	P:GO:0055085; C:GO:0016020	P:transmembrane transport; C:membrane
TRUE	INTERPRO	g7920.t1		582									IPR003959 (PFAM)	F:GO:0005524	F:ATP binding
TRUE	INTERPRO	g21939.t1		267									no IPS match	no IPS match	no IPS match
TRUE	INTERPRO	g19996.t1		132									IPR013068 (PFAM)	no GO terms	no GO terms
TRUE	INTERPRO	g28727.t1		205									IPR000070 (PFAM)	P:GO:0042545; F:GO:0030599; C:GO:0005618	P:cell wall modification; F:pectinesterase activity; C:cell wall
TRUE	INTERPRO	g41399.t1		272									IPR018677 (PFAM); IPR032820 (PFAM); IPR000425 (PFAM)	P:GO:0006810; F:GO:0005215; C:GO:0016020	P:transport; F:transporter activity; C:membrane
TRUE	INTERPRO	g265.t2		168									IPR013926 (PFAM); IPR011516 (PFAM)	no GO terms	no GO terms
TRUE	INTERPRO	g17954.t1		108									no IPS match	no IPS match	no IPS match
TRUE	INTERPRO	g19367.t1		108									no IPS match	no IPS match	no IPS match
TRUE	INTERPRO	g633.t1		213									IPR001781 (PFAM); IPR014977 (PFAM)	F:GO:0008270	F:zinc ion binding
TRUE	INTERPRO	g11337.t1		254									IPR003388 (PFAM); IPR002781 (PFAM)	C:GO:0016020	C:membrane
[truncated: 45,980 more rows]

## Sheet: JSvs.Mock down. FC2
Table S5. Gene Ontology (GO) functional annotation of Nicotiana benthamiana transcriptomes based on InterProScan
Tags	SeqName	SeqName	Description	Length	#Hits	e-Value	sim mean	#GO	GO IDs	GO Names	Enzyme Codes	Enzyme Names	InterPro IDs	InterPro GO IDs	InterPro GO Names
TRUE	INTERPRO, NO-BLAST	g18681.t1	---NA---	650									IPR006918 (PFAM)	P:GO:0010215; P:GO:0016049; C:GO:0031225	P:cellulose microfibril organization; P:cell growth; C:obsolete anchored component of membrane
TRUE	INTERPRO, NO-BLAST	g6884.t1	---NA---	224									no IPS match	no IPS match	no IPS match
TRUE	INTERPRO, NO-BLAST	g23184.t1	---NA---	624									IPR001701 (PFAM); IPR019028 (PFAM)	P:GO:0005975; F:GO:0004553; F:GO:0030246	P:carbohydrate metabolic process; F:hydrolase activity, hydrolyzing O-glycosyl compounds; F:carbohydrate binding
TRUE	INTERPRO, NO-BLAST	g21518.t1	---NA---	193									IPR016140 (PFAM)	no GO terms	no GO terms
TRUE	INTERPRO, BLASTED, MAPPED	g40092.t1	pectin methyl-esterase	537	2	2.74014e-120	63.19	8	P:GO:0042545; P:GO:0045490; P:GO:0071555; F:GO:0004857; F:GO:0030599; F:GO:0045330; F:GO:0046910; C:GO:0005576	P:cell wall modification; P:pectin catabolic process; P:cell wall organization; F:enzyme inhibitor activity; F:pectinesterase activity; F:obsolete aspartyl esterase activity; F:pectinesterase inhibitor activity; C:extracellular region			IPR000070 (PFAM); IPR006501 (PFAM)	P:GO:0042545; F:GO:0004857; F:GO:0030599; C:GO:0005618	P:cell wall modification; F:enzyme inhibitor activity; F:pectinesterase activity; C:cell wall
TRUE	INTERPRO, BLASTED, MAPPED, ANNOTATED	g5285.t1	TIP1	251	1	3.8012e-134	85.32	4	P:GO:0006833; P:GO:0055085; F:GO:0015250; C:GO:0016020	P:water transport; P:transmembrane transport; F:water channel activity; C:membrane			IPR000425 (PFAM); IPR009333 (PFAM)	P:GO:0006810; F:GO:0005215; C:GO:0016020	P:transport; F:transporter activity; C:membrane
TRUE	INTERPRO, BLASTED, MAPPED	g7386.t1	GDP-mannose 4,6-dehydratase	450	1	1.43764e-05	40.31	4	P:GO:0019673; P:GO:0042350; F:GO:0008446; C:GO:0005737	P:GDP-mannose metabolic process; P:GDP-L-fucose biosynthetic process; F:GDP-mannose 4,6-dehydratase activity; C:cytoplasm			IPR016040 (PFAM)	no GO terms	no GO terms
TRUE	INTERPRO, NO-BLAST	g2833.t1	---NA---	219									IPR013194 (PFAM); IPR022007 (PFAM); IPR031398 (PFAM); IPR021622 (PFAM); IPR019269 (PFAM); IPR000533 (PFAM); IPR012852 (PFAM); IPR007568 (PFAM); IPR025577 (PFAM); IPR004827 (PFAM); IPR002490 (PFAM); IPR007285 (PFAM); IPR015866 (PFAM); IPR011516 (PFAM); IPR009252 (PFAM); IPR019347 (PFAM); IPR003106 (PFAM); IPR016866 (PFAM); IPR025925 (PFAM); IPR021418 (PFAM); IPR007243 (PFAM); IPR032510 (PFAM); IPR…	P:GO:0006355; P:GO:0006606; P:GO:0006886; P:GO:0006914; P:GO:0006950; P:GO:0043093; P:GO:0048309; P:GO:0051028; P:GO:0090529; P:GO:1902600; F:GO:0003700; F:GO:0008384; F:GO:0015078; F:GO:0043565; C:GO:0005737; C:GO:0005783; C:GO:0016020; C:GO:0033179	P:regulation of DNA-templated transcription; P:protein import into nucleus; P:intracellular protein transport; P:autophagy; P:response to stress; P:FtsZ-dependent cytokinesis; P:endoplasmic reticulum inheritance; P:mRNA transport; P:cell septum assembly; P:proton transmembrane transport; F:DNA-binding transcription factor activity; F:IkappaB kinase activity; F:proton transmembrane transporter act…
TRUE	INTERPRO, BLASTED, MAPPED	g4095.t1	Ascorbate oxidase	592	1	1.24859e-49	45.68	6	F:GO:0005507; F:GO:0008447; F:GO:0016491; F:GO:0046872; C:GO:0005576; C:GO:0009506	F:copper ion binding; F:L-ascorbate oxidase activity; F:oxidoreductase activity; F:metal ion binding; C:extracellular region; C:plasmodesma			IPR011707 (PFAM); IPR001117 (PFAM); IPR011706 (PFAM)	P:GO:0055114; F:GO:0005507; F:GO:0016491	P:obsolete oxidation-reduction process; F:copper ion binding; F:oxidoreductase activity
TRUE	INTERPRO, NO-BLAST	g29747.t1	---NA---	367									IPR001087 (PFAM)	F:GO:0016788	F:hydrolase activity, acting on ester bonds
TRUE	INTERPRO, NO-BLAST	g9517.t1	---NA---	228									no IPS match	no IPS match	no IPS match
TRUE	INTERPRO, NO-BLAST	g19689.t1	---NA---	361									IPR001087 (PFAM)	F:GO:0016788	F:hydrolase activity, acting on ester bonds
TRUE	INTERPRO, NO-BLAST	g40132.t1	---NA---	276									IPR002076 (PFAM)	C:GO:0016020	C:membrane
TRUE	INTERPRO, NO-BLAST	g184.t1	---NA---	537									IPR005828 (PFAM)	P:GO:0055085; F:GO:0022857; C:GO:0016020	P:transmembrane transport; F:transmembrane transporter activity; C:membrane
TRUE	INTERPRO, NO-BLAST	g40618.t1	---NA---	193									IPR016140 (PFAM)	no GO terms	no GO terms
TRUE	INTERPRO, BLASTED, MAPPED	g33763.t1	Ascorbate oxidase	540	1	2.07279e-50	44.05	6	F:GO:0005507; F:GO:0008447; F:GO:0016491; F:GO:0046872; C:GO:0005576; C:GO:0009506	F:copper ion binding; F:L-ascorbate oxidase activity; F:oxidoreductase activity; F:metal ion binding; C:extracellular region; C:plasmodesma			IPR025345 (PFAM); IPR011707 (PFAM); IPR001117 (PFAM); IPR011706 (PFAM)	P:GO:0055114; F:GO:0005507; F:GO:0016491	P:obsolete oxidation-reduction process; F:copper ion binding; F:oxidoreductase activity
TRUE	INTERPRO, NO-BLAST	g2717.t1	---NA---	510									IPR004299 (PFAM)	no GO terms	no GO terms
TRUE	INTERPRO, NO-BLAST	g23979.t1	---NA---	249									IPR009009 (PFAM); IPR007117 (PFAM); IPR000045 (PFAM)	F:GO:0004190; C:GO:0016020	F:aspartic-type endopeptidase activity; C:membrane
TRUE	INTERPRO, NO-BLAST	g10577.t1	---NA---	354									IPR001087 (PFAM)	F:GO:0016788	F:hydrolase activity, acting on ester bonds
TRUE	INTERPRO, NO-BLAST	g46036.t1	---NA---	259									IPR009009 (PFAM); IPR007117 (PFAM)	no GO terms	no GO terms
TRUE	INTERPRO, BLASTED, MAPPED, ANNOTATED	g1014.t1	senescence 4-like protein	295	2	5.23809e-100	68.78	2	P:GO:0071554; F:GO:0003824	P:cell wall organization or biogenesis; F:catalytic activity			IPR000757 (PFAM); IPR010713 (PFAM)	P:GO:0005975; P:GO:0006073; F:GO:0004553; F:GO:0016762; C:GO:0005618; C:GO:0048046	P:carbohydrate metabolic process; P:obsolete cellular glucan metabolic process; F:hydrolase activity, hydrolyzing O-glycosyl compounds; F:xyloglucan:xyloglucosyl transferase activity; C:cell wall; C:apoplast
TRUE	INTERPRO, NO-BLAST	g27958.t1	---NA---	158									PF01190 (PFAM)	no GO terms	no GO terms
TRUE	INTERPRO, NO-BLAST	g46090.t1	---NA---	259									IPR009009 (PFAM); IPR007117 (PFAM)	no GO terms	no GO terms
TRUE	INTERPRO, NO-BLAST	g27393.t1	---NA---	369									IPR001087 (PFAM)	F:GO:0016788	F:hydrolase activity, acting on ester bonds
TRUE	INTERPRO, NO-BLAST	g19970.t1	---NA---	219									IPR000580 (PFAM); IPR016866 (PFAM); IPR018482 (PFAM); IPR005647 (PFAM); IPR008417 (PFAM); IPR002490 (PFAM); IPR007568 (PFAM); IPR012929 (PFAM); IPR025519 (PFAM); IPR000533 (PFAM); IPR021418 (PFAM); IPR019347 (PFAM); IPR007285 (PFAM); IPR004827 (PFAM); IPR019269 (PFAM); IPR021297 (PFAM); IPR003106 (PFAM); IPR021622 (PFAM); IPR013253 (PFAM); IPR012852 (PFAM); IPR015866 (PFAM); IPR007243 (PFAM)	P:GO:0006355; P:GO:0006606; P:GO:0006886; P:GO:0006914; P:GO:0006950; P:GO:1902600; F:GO:0003700; F:GO:0015078; F:GO:0043565; C:GO:0005783; C:GO:0016020; C:GO:0033179	P:regulation of DNA-templated transcription; P:protein import into nucleus; P:intracellular protein transport; P:autophagy; P:response to stress; P:proton transmembrane transport; F:DNA-binding transcription factor activity; F:proton transmembrane transporter activity; F:sequence-specific DNA binding; C:endoplasmic reticulum; C:membrane; C:proton-transporting V-type ATPase, V0 domain
TRUE	INTERPRO, BLASTED, MAPPED, ANNOTATED	g19082.t1	putative methyltransferase	618	2	7.24955e-141	59.81	1	C:GO:0110165	C:cellular anatomical structure			IPR004159 (PFAM)	F:GO:0008168	F:methyltransferase activity
TRUE	INTERPRO, BLASTED, MAPPED	g978.t1	pectin methyl-esterase	561	2	1.73731e-126	52.22	8	P:GO:0042545; P:GO:0045490; P:GO:0071555; F:GO:0004857; F:GO:0030599; F:GO:0045330; F:GO:0046910; C:GO:0005576	P:cell wall modification; P:pectin catabolic process; P:cell wall organization; F:enzyme inhibitor activity; F:pectinesterase activity; F:obsolete aspartyl esterase activity; F:pectinesterase inhibitor activity; C:extracellular region			IPR000070 (PFAM); IPR006501 (PFAM)	P:GO:0042545; F:GO:0004857; F:GO:0030599; C:GO:0005618	P:cell wall modification; F:enzyme inhibitor activity; F:pectinesterase activity; C:cell wall
TRUE	INTERPRO, NO-BLAST	g20623.t1	---NA---	579									IPR021102 (PFAM)	no GO terms	no GO terms
TRUE	INTERPRO, NO-BLAST	g36934.t1	---NA---	500									IPR008166 (PFAM)	no GO terms	no GO terms
TRUE	INTERPRO, NO-BLAST	g28503.t2	---NA---	258									IPR013216 (PFAM); IPR021829 (PFAM); IPR013431 (PFAM)	P:GO:0008152; F:GO:0008168	P:metabolic process; F:methyltransferase activity
TRUE	INTERPRO, NO-BLAST	g27394.t1	---NA---	367									IPR001087 (PFAM)	F:GO:0016788	F:hydrolase activity, acting on ester bonds
TRUE	INTERPRO, BLASTED, MAPPED	g37770.t1	TIP1	248	1	1.04651e-72	70.9	5	P:GO:0006833; P:GO:0055085; F:GO:0015250; F:GO:0015267; C:GO:0016020	P:water transport; P:transmembrane transport; F:water channel activity; F:channel activity; C:membrane			IPR000425 (PFAM)	P:GO:0006810; F:GO:0005215; C:GO:0016020	P:transport; F:transporter activity; C:membrane
TRUE	INTERPRO, NO-BLAST	g44680.t1	---NA---	569									IPR002495 (PFAM); IPR018851 (PFAM)	F:GO:0016757	F:glycosyltransferase activity
TRUE	INTERPRO, BLASTED, MAPPED	g42383.t1	chalcone synthase	492	2	6.55354e-09	40.34	7	P:GO:0009058; P:GO:0009813; P:GO:0030639; F:GO:0016210; F:GO:0016746; F:GO:0016747; F:GO:0102128	P:biosynthetic process; P:flavonoid biosynthetic process; P:polyketide biosynthetic process; F:naringenin-chalcone synthase activity; F:acyltransferase activity; F:acyltransferase activity, transferring groups other than amino-acyl groups; F:obsolete chalcone synthase activity			IPR013601 (PFAM); IPR013747 (PFAM)	P:GO:0006633; F:GO:0016747; C:GO:0016020	P:fatty acid biosynthetic process; F:acyltransferase activity, transferring groups other than amino-acyl groups; C:membrane
TRUE	INTERPRO, BLASTED, MAPPED	g10712.t1	pectin methyl-esterase	580	2	7.73691e-132	53.28	8	P:GO:0042545; P:GO:0045490; P:GO:0071555; F:GO:0004857; F:GO:0030599; F:GO:0045330; F:GO:0046910; C:GO:0005576	P:cell wall modification; P:pectin catabolic process; P:cell wall organization; F:enzyme inhibitor activity; F:pectinesterase activity; F:obsolete aspartyl esterase activity; F:pectinesterase inhibitor activity; C:extracellular region			IPR021792 (PFAM); IPR009988 (PFAM); IPR000070 (PFAM); IPR006389 (PFAM); IPR009606 (PFAM); IPR006501 (PFAM); IPR025273 (PFAM); IPR029101 (PFAM)	P:GO:0042545; F:GO:0004564; F:GO:0004575; F:GO:0004857; F:GO:0030599; C:GO:0005618	P:cell wall modification; F:beta-fructofuranosidase activity; F:sucrose alpha-glucosidase activity; F:enzyme inhibitor activity; F:pectinesterase activity; C:cell wall
TRUE	INTERPRO, BLASTED, MAPPED	g22793.t1	Ascorbate oxidase	540	1	4.36855e-51	44.05	6	F:GO:0005507; F:GO:0008447; F:GO:0016491; F:GO:0046872; C:GO:0005576; C:GO:0009506	F:copper ion binding; F:L-ascorbate oxidase activity; F:oxidoreductase activity; F:metal ion binding; C:extracellular region; C:plasmodesma			IPR025345 (PFAM); IPR011707 (PFAM); IPR011706 (PFAM); IPR001117 (PFAM)	P:GO:0055114; F:GO:0005507; F:GO:0016491	P:obsolete oxidation-reduction process; F:copper ion binding; F:oxidoreductase activity
TRUE	INTERPRO, NO-BLAST	g43660.t1	---NA---	348									IPR006766 (PFAM)	no GO terms	no GO terms
TRUE	INTERPRO, BLASTED, MAPPED	g12617.t1	epoxide hydrolase	472	2	5.30481e-07	44.84	4	F:GO:0003824; F:GO:0004301; F:GO:0016787; F:GO:0033961	F:catalytic activity; F:epoxide hydrolase activity; F:hydrolase activity; F:cis-stilbene-oxide hydrolase activity			IPR000073 (PFAM); IPR003817 (PFAM)	P:GO:0008654; F:GO:0004609	P:phospholipid biosynthetic process; F:phosphatidylserine decarboxylase activity
TRUE	INTERPRO, NO-BLAST	g11405.t1	---NA---	627									IPR013904 (PFAM); IPR012418 (PFAM); PF05348 (PFAM)	no GO terms	no GO terms
TRUE	INTERPRO, BLASTED, MAPPED	g15946.t1	Ascorbate oxidase	538	1	3.34709e-57	45.96	6	F:GO:0005507; F:GO:0008447; F:GO:0016491; F:GO:0046872; C:GO:0005576; C:GO:0009506	F:copper ion binding; F:L-ascorbate oxidase activity; F:oxidoreductase activity; F:metal ion binding; C:extracellular region; C:plasmodesma			IPR001117 (PFAM); IPR011707 (PFAM); IPR011706 (PFAM)	P:GO:0055114; F:GO:0005507; F:GO:0016491	P:obsolete oxidation-reduction process; F:copper ion binding; F:oxidoreductase activity
TRUE	INTERPRO, NO-BLAST	g30166.t1	---NA---	547									IPR002495 (PFAM)	F:GO:0016757	F:glycosyltransferase activity
TRUE	INTERPRO, BLASTED, MAPPED, ANNOTATED	g27033.t1	senescence 4-like protein	289	2	1.49938e-77	61.14	1	F:GO:0003824	F:catalytic activity			IPR010713 (PFAM); IPR000757 (PFAM)	P:GO:0005975; P:GO:0006073; F:GO:0004553; F:GO:0016762; C:GO:0005618; C:GO:0048046	P:carbohydrate metabolic process; P:obsolete cellular glucan metabolic process; F:hydrolase activity, hydrolyzing O-glycosyl compounds; F:xyloglucan:xyloglucosyl transferase activity; C:cell wall; C:apoplast
TRUE	INTERPRO, NO-BLAST	g7314.t1	---NA---	286									IPR000726 (PFAM)	P:GO:0006032; P:GO:0016998; F:GO:0004568	P:chitin catabolic process; P:cell wall macromolecule catabolic process; F:chitinase activity
TRUE	INTERPRO, BLASTED, MAPPED, ANNOTATED	g4219.t1	serine palmitoyltransferase subunit I	486	4	7.13307e-147	60.97	5	P:GO:0046512; P:GO:0046513; F:GO:0004758; F:GO:0030170; C:GO:0005783	P:sphingosine biosynthetic process; P:ceramide biosynthetic process; F:serine C-palmitoyltransferase activity; F:pyridoxal phosphate binding; C:endoplasmic reticulum	EC:2.3.1.50	serine C-palmitoyltransferase	IPR004839 (PFAM); IPR022228 (PFAM)	P:GO:0009058; F:GO:0030170	P:biosynthetic process; F:pyridoxal phosphate binding
TRUE	INTERPRO, NO-BLAST	g19717.t1	---NA---	566									IPR002495 (PFAM); IPR018851 (PFAM)	F:GO:0016757	F:glycosyltransferase activity
TRUE	INTERPRO, NO-BLAST	g45050.t1	---NA---	470									IPR004263 (PFAM)	no GO terms	no GO terms
TRUE	INTERPRO, NO-BLAST	g12928.t1	---NA---	402									IPR004963 (PFAM)	F:GO:0016787	F:hydrolase activity
TRUE	INTERPRO, NO-BLAST	g11240.t1	---NA---	462									IPR011701 (PFAM); IPR006938 (PFAM); IPR008509 (PFAM)	P:GO:0015689; P:GO:0055085; F:GO:0015098; C:GO:0016020	P:molybdate ion transport; P:transmembrane transport; F:molybdate ion transmembrane transporter activity; C:membrane
TRUE	INTERPRO, NO-BLAST	g26744.t1	---NA---	240									IPR007117 (PFAM); IPR009009 (PFAM)	no GO terms	no GO terms
TRUE	INTERPRO, NO-BLAST	g529.t1	---NA---	422									IPR000782 (PFAM)	no GO terms	no GO terms
TRUE	INTERPRO, NO-BLAST	g37847.t1	---NA---	420									IPR000490 (PFAM)	P:GO:0005975; F:GO:0004553	P:carbohydrate metabolic process; F:hydrolase activity, hydrolyzing O-glycosyl compounds
TRUE	INTERPRO, NO-BLAST	g7062.t1	---NA---	484									no IPS match	no IPS match	no IPS match
TRUE	INTERPRO, BLASTED, MAPPED, ANNOTATED	g3050.t1	PME inhibitor	194	2	1.81938e-64	66.14	2	P:GO:0071555; F:GO:0004857	P:cell wall organization; F:enzyme inhibitor activity			IPR006983 (PFAM); IPR006501 (PFAM); IPR004367 (PFAM)	F:GO:0004857; C:GO:0005634	F:enzyme inhibitor activity; C:nucleus
TRUE	INTERPRO, NO-BLAST	g17799.t1	---NA---	449									IPR000782 (PFAM)	no GO terms	no GO terms
TRUE	INTERPRO, BLASTED, MAPPED	g16518.t1	Ascorbate oxidase	592	1	6.28781e-50	45.86	6	F:GO:0005507; F:GO:0008447; F:GO:0016491; F:GO:0046872; C:GO:0005576; C:GO:0009506	F:copper ion binding; F:L-ascorbate oxidase activity; F:oxidoreductase activity; F:metal ion binding; C:extracellular region; C:plasmodesma			IPR001117 (PFAM); IPR011707 (PFAM); IPR011706 (PFAM)	P:GO:0055114; F:GO:0005507; F:GO:0016491	P:obsolete oxidation-reduction process; F:copper ion binding; F:oxidoreductase activity
TRUE	INTERPRO, BLASTED, MAPPED	g35492.t1	TIP1	291	1	6.84953e-37	54.94	5	P:GO:0006833; P:GO:0055085; F:GO:0015250; F:GO:0015267; C:GO:0016020	P:water transport; P:transmembrane transport; F:water channel activity; F:channel activity; C:membrane			IPR000425 (PFAM)	P:GO:0006810; F:GO:0005215; C:GO:0016020	P:transport; F:transporter activity; C:membrane
TRUE	INTERPRO, NO-BLAST	g6980.t1	---NA---	416									IPR000782 (PFAM); IPR004927 (PFAM)	P:GO:0046413; F:GO:0018836	P:obsolete organomercury catabolic process; F:alkylmercury lyase activity
TRUE	INTERPRO, BLASTED, MAPPED	g36625.t1	pectin methyl-esterase	537	2	5.16899e-120	63.08	8	P:GO:0042545; P:GO:0045490; P:GO:0071555; F:GO:0004857; F:GO:0030599; F:GO:0045330; F:GO:0046910; C:GO:0005576	P:cell wall modification; P:pectin catabolic process; P:cell wall organization; F:enzyme inhibitor activity; F:pectinesterase activity; F:obsolete aspartyl esterase activity; F:pectinesterase inhibitor activity; C:extracellular region			IPR000070 (PFAM); IPR006501 (PFAM)	P:GO:0042545; F:GO:0004857; F:GO:0030599; C:GO:0005618	P:cell wall modification; F:enzyme inhibitor activity; F:pectinesterase activity; C:cell wall
TRUE	INTERPRO, NO-BLAST	g3139.t1	---NA---	261									IPR007117 (PFAM); IPR009009 (PFAM)	no GO terms	no GO terms
TRUE	INTERPRO, BLASTED, MAPPED, ANNOTATED	g18667.t1	RecName: Full=Probable aspartic proteinase GIP2; AltName: Full=Glucanase inhibitor protein 2; Short=NbGIP2; Flags: Precursor	439	3	0	86.22	6	P:GO:0006508; P:GO:0006952; F:GO:0004190; C:GO:0005794; C:GO:0005886; C:GO:0048046	P:proteolysis; P:defense response; F:aspartic-type endopeptidase activity; C:Golgi apparatus; C:plasma membrane; C:apoplast	EC:3.4.23	Acting on peptide bonds (peptidases)	IPR032799 (PFAM); IPR032861 (PFAM)	no GO terms	no GO terms
TRUE	INTERPRO, NO-BLAST	g42395.t1	---NA---	249									IPR007117 (PFAM); IPR009009 (PFAM)	no GO terms	no GO terms
TRUE	INTERPRO, BLASTED, MAPPED	g13522.t2	lipid transfer protein 1	118	2	1.21977e-22	66.43	3	P:GO:0006869; F:GO:0008289; C:GO:0016020	P:lipid transport; F:lipid binding; C:membrane			IPR016140 (PFAM)	no GO terms	no GO terms
TRUE	INTERPRO, BLASTED, MAPPED	g25630.t1	TIP1	248	1	5.88695e-75	71.08	5	P:GO:0006833; P:GO:0055085; F:GO:0015250; F:GO:0015267; C:GO:0016020	P:water transport; P:transmembrane transport; F:water channel activity; F:channel activity; C:membrane			IPR000425 (PFAM)	P:GO:0006810; F:GO:0005215; C:GO:0016020	P:transport; F:transporter activity; C:membrane
TRUE	INTERPRO, NO-BLAST	g18545.t1	---NA---	480									IPR032677 (PFAM); IPR000490 (PFAM); IPR018551 (PFAM); IPR012946 (PFAM)	P:GO:0005975; F:GO:0004553	P:carbohydrate metabolic process; F:hydrolase activity, hydrolyzing O-glycosyl compounds
TRUE	INTERPRO, NO-BLAST	g17029.t1	---NA---	454									IPR000782 (PFAM)	no GO terms	no GO terms
TRUE	INTERPRO, NO-BLAST	g40683.t1	---NA---	451									IPR018650 (PFAM); IPR020966 (PFAM)	P:GO:0015743	P:malate transport
TRUE	INTERPRO, BLASTED, MAPPED	g6787.t1	extracellular dermal glycoprotein	438	2	3.13091e-09	38.23	7	P:GO:0006508; P:GO:0006952; F:GO:0004190; C:GO:0005576; C:GO:0005794; C:GO:0005886; C:GO:0048046	P:proteolysis; P:defense response; F:aspartic-type endopeptidase activity; C:extracellular region; C:Golgi apparatus; C:plasma membrane; C:apoplast			IPR032861 (PFAM); IPR032799 (PFAM)	no GO terms	no GO terms
TRUE	INTERPRO, BLASTED	g43847.t1	gibberellin-regulated protein 6	115	2	4.78655e-33	68.7						IPR009565 (PFAM); IPR003854 (PFAM)	no GO terms	no GO terms
TRUE	INTERPRO, NO-BLAST	g1717.t1	---NA---	367									IPR006946 (PFAM)	no GO terms	no GO terms
TRUE	INTERPRO, BLASTED, MAPPED, ANNOTATED	g24000.t1	putative methyltransferase	611	2	0	81.2	5	P:GO:0032259; F:GO:0008168; C:GO:0005768; C:GO:0005802; C:GO:0016020	P:methylation; F:methyltransferase activity; C:endosome; C:trans-Golgi network; C:membrane	EC:2.1.1	Transferring one-carbon groups	IPR004159 (PFAM)	F:GO:0008168	F:methyltransferase activity
TRUE	INTERPRO	g23727.t1		523									IPR013601 (PFAM); IPR003856 (PFAM); IPR012328 (PFAM)	P:GO:0006633; P:GO:0009103; F:GO:0016747; C:GO:0016020	P:fatty acid biosynthetic process; P:lipopolysaccharide biosynthetic process; F:acyltransferase activity, transferring groups other than amino-acyl groups; C:membrane
TRUE	INTERPRO, NO-BLAST	g5766.t1	---NA---	371									IPR001087 (PFAM)	F:GO:0016788	F:hydrolase activity, acting on ester bonds
TRUE	INTERPRO	g812.t1		438									IPR032861 (PFAM); IPR032799 (PFAM)	no GO terms	no GO terms
TRUE	INTERPRO, NO-BLAST	g25005.t1	---NA---	267									IPR006719 (PFAM); IPR000782 (PFAM)	P:GO:0007304; F:GO:0005213; C:GO:0005576; C:GO:0042600	P:chorion-containing eggshell formation; F:structural constituent of egg chorion; C:extracellular region; C:egg chorion
TRUE	INTERPRO, BLASTED, MAPPED	g35643.t1	RecName: Full=Probable aspartic proteinase GIP2; AltName: Full=Glucanase inhibitor protein 2; Short=NbGIP2; Flags: Precursor	440	2	4.68252e-20	42.79	7	P:GO:0006508; P:GO:0006952; F:GO:0004190; C:GO:0005576; C:GO:0005794; C:GO:0005886; C:GO:0048046	P:proteolysis; P:defense response; F:aspartic-type endopeptidase activity; C:extracellular region; C:Golgi apparatus; C:plasma membrane; C:apoplast			IPR032861 (PFAM); IPR032799 (PFAM)	no GO terms	no GO terms
TRUE	INTERPRO, NO-BLAST	g28961.t1	---NA---	356									IPR002495 (PFAM)	F:GO:0016757	F:glycosyltransferase activity
TRUE	INTERPRO, NO-BLAST	g42610.t1	---NA---	628									IPR004873 (PFAM)	no GO terms	no GO terms
TRUE	INTERPRO, NO-BLAST	g7241.t1	---NA---	750									IPR032880 (PFAM); IPR003864 (PFAM); IPR027815 (PFAM)	C:GO:0016020	C:membrane
TRUE	INTERPRO, NO-BLAST	g655.t1	---NA---	420									IPR008579 (PFAM); PF12710 (PFAM); IPR002123 (PFAM)	P:GO:0008152; F:GO:0016746	P:metabolic process; F:acyltransferase activity
TRUE	INTERPRO, NO-BLAST	g2895.t1	---NA---	223									IPR001471 (PFAM)	P:GO:0006355; F:GO:0003700	P:regulation of DNA-templated transcription; F:DNA-binding transcription factor activity
TRUE	INTERPRO, NO-BLAST	g2100.t1	---NA---	257									IPR005519 (PFAM); IPR024320 (PFAM)	no GO terms	no GO terms
TRUE	INTERPRO, NO-BLAST	g24143.t1	---NA---	482									IPR010620 (PFAM); IPR001258 (PFAM)	F:GO:0005515	F:protein binding
TRUE	INTERPRO, NO-BLAST	g23374.t1	---NA---	351									IPR001471 (PFAM)	P:GO:0006355; F:GO:0003700	P:regulation of DNA-templated transcription; F:DNA-binding transcription factor activity
TRUE	INTERPRO, BLASTED, MAPPED, ANNOTATED	g30878.t1	clade XI lectin receptor kinase	669	20	0	57.24	4	P:GO:0050896; F:GO:0004672; F:GO:0005524; C:GO:0016020	P:response to stimulus; F:protein kinase activity; F:ATP binding; C:membrane	EC:2.7.1	Transferring phosphorus-containing groups	IPR000719 (PFAM); IPR001611 (PFAM); IPR013210 (PFAM); IPR024529 (PFAM); IPR003470 (PFAM); IPR025875 (PFAM); IPR027789 (PFAM)	P:GO:0006468; F:GO:0004672; F:GO:0005215; F:GO:0005515; F:GO:0005524	P:protein phosphorylation; F:protein kinase activity; F:transporter activity; F:protein binding; F:ATP binding
TRUE	INTERPRO	g13446.t1		200									IPR006946 (PFAM)	no GO terms	no GO terms
TRUE	INTERPRO, NO-BLAST	g44036.t1	---NA---	454									IPR000782 (PFAM); IPR025515 (PFAM)	no GO terms	no GO terms
TRUE	INTERPRO, NO-BLAST	g4276.t1	---NA---	374									IPR006946 (PFAM)	no GO terms	no GO terms
TRUE	INTERPRO, BLASTED, MAPPED, ANNOTATED	g7505.t1	pectin methyl-esterase	464	2	1.34283e-172	60.44	1	P:GO:0009987	P:cellular process			IPR006501 (PFAM); IPR000070 (PFAM)	P:GO:0042545; F:GO:0004857; F:GO:0030599; C:GO:0005618	P:cell wall modification; F:enzyme inhibitor activity; F:pectinesterase activity; C:cell wall
TRUE	INTERPRO, NO-BLAST	g30239.t1	---NA---	176									IPR003245 (PFAM)	F:GO:0009055	F:electron transfer activity
TRUE	INTERPRO, NO-BLAST	g22819.t1	---NA---	256									IPR009009 (PFAM); IPR007117 (PFAM)	no GO terms	no GO terms
TRUE	INTERPRO, NO-BLAST	g18578.t1	---NA---	88									IPR005513 (PFAM)	P:GO:0009790	P:embryo development
TRUE	INTERPRO, NO-BLAST	g25051.t1	---NA---	462									IPR000782 (PFAM)	no GO terms	no GO terms
TRUE	INTERPRO, BLASTED, MAPPED, ANNOTATED	g38386.t1	senescence 4-like protein	298	2	8.07479e-91	62.66	2	P:GO:0071554; F:GO:0003824	P:cell wall organization or biogenesis; F:catalytic activity			IPR000757 (PFAM); IPR010713 (PFAM)	P:GO:0005975; P:GO:0006073; F:GO:0004553; F:GO:0016762; C:GO:0005618; C:GO:0048046	P:carbohydrate metabolic process; P:obsolete cellular glucan metabolic process; F:hydrolase activity, hydrolyzing O-glycosyl compounds; F:xyloglucan:xyloglucosyl transferase activity; C:cell wall; C:apoplast
TRUE	INTERPRO, NO-BLAST	g20718.t1	---NA---	374									IPR006946 (PFAM)	no GO terms	no GO terms
TRUE	INTERPRO, BLASTED, MAPPED	g3619.t1	extracellular dermal glycoprotein	447	2	2.00469e-08	38.76	7	P:GO:0006508; P:GO:0006952; F:GO:0004190; C:GO:0005576; C:GO:0005794; C:GO:0005886; C:GO:0048046	P:proteolysis; P:defense response; F:aspartic-type endopeptidase activity; C:extracellular region; C:Golgi apparatus; C:plasma membrane; C:apoplast			IPR032861 (PFAM); IPR032799 (PFAM)	no GO terms	no GO terms
TRUE	INTERPRO, NO-BLAST	g36513.t1	---NA---	407									IPR000782 (PFAM)	no GO terms	no GO terms
TRUE	INTERPRO, BLASTED	g34185.t1	ascorbate peroxidase	358	1	2.24326e-09	41.63						IPR002016 (PFAM)	P:GO:0006979; P:GO:0055114; F:GO:0004601; F:GO:0020037	P:response to oxidative stress; P:obsolete oxidation-reduction process; F:peroxidase activity; F:heme binding
TRUE	INTERPRO, BLASTED, MAPPED	g23950.t1	chalcone synthase	492	2	4.56412e-09	41.74	7	P:GO:0009058; P:GO:0009813; P:GO:0030639; F:GO:0016210; F:GO:0016746; F:GO:0016747; F:GO:0102128	P:biosynthetic process; P:flavonoid biosynthetic process; P:polyketide biosynthetic process; F:naringenin-chalcone synthase activity; F:acyltransferase activity; F:acyltransferase activity, transferring groups other than amino-acyl groups; F:obsolete chalcone synthase activity			IPR013601 (PFAM); IPR013747 (PFAM)	P:GO:0006633; F:GO:0016747; C:GO:0016020	P:fatty acid biosynthetic process; F:acyltransferase activity, transferring groups other than amino-acyl groups; C:membrane
TRUE	INTERPRO, NO-BLAST	g24974.t1	---NA---	352									IPR001087 (PFAM)	F:GO:0016788	F:hydrolase activity, acting on ester bonds
TRUE	INTERPRO, BLASTED, MAPPED	g39566.t1	senescence 4-like protein	294	2	5.02427e-57	52.42	8	P:GO:0010411; P:GO:0042546; P:GO:0071555; F:GO:0004553; F:GO:0016740; F:GO:0016762; F:GO:0016798; C:GO:0048046	P:xyloglucan metabolic process; P:cell wall biogenesis; P:cell wall organization; F:hydrolase activity, hydrolyzing O-glycosyl compounds; F:transferase activity; F:xyloglucan:xyloglucosyl transferase activity; F:hydrolase activity, acting on glycosyl bonds; C:apoplast			IPR010713 (PFAM); IPR000757 (PFAM)	P:GO:0005975; P:GO:0006073; F:GO:0004553; F:GO:0016762; C:GO:0005618; C:GO:0048046	P:carbohydrate metabolic process; P:obsolete cellular glucan metabolic process; F:hydrolase activity, hydrolyzing O-glycosyl compounds; F:xyloglucan:xyloglucosyl transferase activity; C:cell wall; C:apoplast
TRUE	INTERPRO, BLASTED, MAPPED	g35025.t1	Chain C, Membrane-localized LRR receptor-like protein	892	20	1.84421e-121	51.29	11	P:GO:0002229; P:GO:0006952; P:GO:0042742; P:GO:0051707; F:GO:0004672; F:GO:0004674; F:GO:0005524; F:GO:0016301; F:GO:0030246; C:GO:0005886; C:GO:0016020	P:defense response to oomycetes; P:defense response; P:defense response to bacterium; P:response to other organism; F:protein kinase activity; F:protein serine/threonine kinase activity; F:ATP binding; F:kinase activity; F:carbohydrate binding; C:plasma membrane; C:membrane			IPR001611 (PFAM); IPR001611 (PFAM); IPR025875 (PFAM); IPR001245 (PFAM); IPR025273 (PFAM); IPR013210 (PFAM); IPR004102 (PFAM)	P:GO:0006468; P:GO:0006471; F:GO:0003950; F:GO:0004672; F:GO:0005515	P:protein phosphorylation; P:obsolete protein ADP-ribosylation; F:NAD+-protein poly-ADP-ribosyltransferase activity; F:protein kinase activity; F:protein binding
TRUE	INTERPRO, NO-BLAST	g16050.t1	---NA---	261									IPR007117 (PFAM); IPR009009 (PFAM)	no GO terms	no GO terms
TRUE	INTERPRO, NO-BLAST	g43858.t1	---NA---	478									IPR006948 (PFAM); IPR006947 (PFAM)	F:GO:0016846	F:carbon-sulfur lyase activity
TRUE	INTERPRO, BLASTED, MAPPED, ANNOTATED	g23322.t1	clade VIII lectin receptor kinase	326	20	1.07617e-115	56.15	4	P:GO:0050896; F:GO:0004672; F:GO:0005488; C:GO:0016020	P:response to stimulus; F:protein kinase activity; F:binding; C:membrane	EC:2.7.1	Transferring phosphorus-containing groups	IPR000719 (PFAM)	P:GO:0006468; F:GO:0004672; F:GO:0005524	P:protein phosphorylation; F:protein kinase activity; F:ATP binding
TRUE	INTERPRO, BLASTED, MAPPED	g41939.t1	TIP1	283	1	2.0033e-36	54.07	5	P:GO:0006833; P:GO:0055085; F:GO:0015250; F:GO:0015267; C:GO:0016020	P:water transport; P:transmembrane transport; F:water channel activity; F:channel activity; C:membrane			IPR000425 (PFAM)	P:GO:0006810; F:GO:0005215; C:GO:0016020	P:transport; F:transporter activity; C:membrane
TRUE	INTERPRO, NO-BLAST	g39170.t1	---NA---	297									IPR002902 (PFAM); IPR007567 (PFAM); IPR010445 (PFAM)	C:GO:0005886	C:plasma membrane
TRUE	INTERPRO, BLASTED, MAPPED, ANNOTATED	g2540.t1	MAP kinase	406	20	1.4951e-84	51.58	3	P:GO:0007165; F:GO:0004674; F:GO:0005524	P:signal transduction; F:protein serine/threonine kinase activity; F:ATP binding	EC:2.7.11.1	non-specific serine/threonine protein kinase	IPR000719 (PFAM); IPR004041 (PFAM)	P:GO:0006468; P:GO:0007165; F:GO:0004672; F:GO:0005524	P:protein phosphorylation; P:signal transduction; F:protein kinase activity; F:ATP binding
TRUE	INTERPRO, NO-BLAST	g1395.t1	---NA---	115									IPR016140 (PFAM)	no GO terms	no GO terms
TRUE	INTERPRO, NO-BLAST	g1650.t1	---NA---	510									IPR001360 (PFAM); IPR008869 (PFAM)	P:GO:0005975; F:GO:0004553	P:carbohydrate metabolic process; F:hydrolase activity, hydrolyzing O-glycosyl compounds
TRUE	INTERPRO, NO-BLAST	g43172.t1	---NA---	628									IPR006694 (PFAM); IPR009319 (PFAM); IPR021940 (PFAM); IPR002347 (PFAM); IPR013269 (PFAM)	P:GO:0006633; P:GO:0055114; F:GO:0005198; F:GO:0005506; F:GO:0016491; C:GO:0019028	P:fatty acid biosynthetic process; P:obsolete oxidation-reduction process; F:structural molecule activity; F:iron ion binding; F:oxidoreductase activity; C:viral capsid
TRUE	INTERPRO, BLASTED, MAPPED	g43679.t1	TIP1	283	1	6.15429e-36	53.66	5	P:GO:0006833; P:GO:0055085; F:GO:0015250; F:GO:0015267; C:GO:0016020	P:water transport; P:transmembrane transport; F:water channel activity; F:channel activity; C:membrane			IPR000425 (PFAM)	P:GO:0006810; F:GO:0005215; C:GO:0016020	P:transport; F:transporter activity; C:membrane
TRUE	INTERPRO, NO-BLAST	g33095.t1	---NA---	251									IPR000782 (PFAM)	no GO terms	no GO terms
TRUE	INTERPRO, NO-BLAST	g45723.t1	---NA---	476									IPR000490 (PFAM); IPR012946 (PFAM)	P:GO:0005975; F:GO:0004553	P:carbohydrate metabolic process; F:hydrolase activity, hydrolyzing O-glycosyl compounds
TRUE	INTERPRO, BLASTED, MAPPED	g31372.t1	nicotine N-demethylase	500	4	3.21393e-16	44.4	12	P:GO:0010268; P:GO:0016125; P:GO:0016132; P:GO:0032259; F:GO:0004497; F:GO:0004796; F:GO:0005506; F:GO:0008168; F:GO:0016705; F:GO:0020037; F:GO:0046872; C:GO:0016020	P:brassinosteroid homeostasis; P:sterol metabolic process; P:brassinosteroid biosynthetic process; P:methylation; F:monooxygenase activity; F:thromboxane-A synthase activity; F:iron ion binding; F:methyltransferase activity; F:oxidoreductase activity, acting on paired donors, with incorporation or reduction of molecular oxygen; F:heme binding; F:metal ion binding; C:membrane			IPR001128 (PFAM)	P:GO:0055114; F:GO:0005506; F:GO:0016705; F:GO:0020037	P:obsolete oxidation-reduction process; F:iron ion binding; F:oxidoreductase activity, acting on paired donors, with incorporation or reduction of molecular oxygen; F:heme binding
TRUE	INTERPRO, NO-BLAST	g45206.t1	---NA---	248									IPR007117 (PFAM); IPR009009 (PFAM)	no GO terms	no GO terms
TRUE	INTERPRO, NO-BLAST	g35381.t1	---NA---	533									PF13641 (PFAM); IPR025517 (PFAM); IPR001173 (PFAM)	no GO terms	no GO terms
TRUE	INTERPRO, NO-BLAST	g16562.t1	---NA---	527									IPR015345 (PFAM); IPR006094 (PFAM)	P:GO:0009690; P:GO:0055114; F:GO:0016491; F:GO:0019139; F:GO:0050660	P:cytokinin metabolic process; P:obsolete oxidation-reduction process; F:oxidoreductase activity; F:cytokinin dehydrogenase activity; F:flavin adenine dinucleotide binding
TRUE	INTERPRO, BLASTED, MAPPED	g6553.t1	TIP1	284	1	7.05337e-37	54.13	5	P:GO:0006833; P:GO:0055085; F:GO:0015250; F:GO:0015267; C:GO:0016020	P:water transport; P:transmembrane transport; F:water channel activity; F:channel activity; C:membrane			IPR000425 (PFAM)	P:GO:0006810; F:GO:0005215; C:GO:0016020	P:transport; F:transporter activity; C:membrane
TRUE	INTERPRO, NO-BLAST	g35619.t1	---NA---	259									IPR009009 (PFAM); IPR007117 (PFAM)	no GO terms	no GO terms
TRUE	INTERPRO, NO-BLAST	g16508.t2	---NA---	182									IPR017423 (PFAM); IPR000836 (PFAM)	P:GO:0009116; P:GO:0030488; C:GO:0031515	P:nucleoside metabolic process; P:tRNA methylation; C:tRNA (m1A) methyltransferase complex
TRUE	INTERPRO, NO-BLAST	g33695.t1	---NA---	525									PF12669 (PFAM); IPR001701 (PFAM)	P:GO:0005975; F:GO:0004553	P:carbohydrate metabolic process; F:hydrolase activity, hydrolyzing O-glycosyl compounds
TRUE	INTERPRO, BLASTED	g30326.t1	ascorbate peroxidase	328	1	7.51632e-18	42.2						IPR002016 (PFAM)	P:GO:0006979; P:GO:0055114; F:GO:0004601; F:GO:0020037	P:response to oxidative stress; P:obsolete oxidation-reduction process; F:peroxidase activity; F:heme binding
TRUE	INTERPRO, NO-BLAST	g10574.t1	---NA---	261									IPR005519 (PFAM)	no GO terms	no GO terms
TRUE	INTERPRO, BLASTED, MAPPED, ANNOTATED	g11515.t1	PME inhibitor	191	2	5.27412e-62	66.16	1	P:GO:0009987	P:cellular process			IPR006501 (PFAM); IPR005240 (PFAM)	F:GO:0004857	F:enzyme inhibitor activity
TRUE	INTERPRO, NO-BLAST	g1033.t1	---NA---	239									IPR004316 (PFAM); IPR005336 (PFAM)	P:GO:0006850; C:GO:0005743; C:GO:0016020	P:mitochondrial pyruvate transmembrane transport; C:mitochondrial inner membrane; C:membrane
TRUE	INTERPRO, NO-BLAST	g11510.t1	---NA---	350									IPR006766 (PFAM)	no GO terms	no GO terms
TRUE	INTERPRO, BLASTED, MAPPED	g44516.t1	cytochrome P450 83B1-like	488	3	2.10629e-16	46.19	10	P:GO:0010268; P:GO:0016125; P:GO:0016132; F:GO:0004497; F:GO:0004796; F:GO:0005506; F:GO:0016705; F:GO:0020037; F:GO:0046872; C:GO:0016020	P:brassinosteroid homeostasis; P:sterol metabolic process; P:brassinosteroid biosynthetic process; F:monooxygenase activity; F:thromboxane-A synthase activity; F:iron ion binding; F:oxidoreductase activity, acting on paired donors, with incorporation or reduction of molecular oxygen; F:heme binding; F:metal ion binding; C:membrane			IPR019384 (PFAM); IPR001128 (PFAM); IPR007062 (PFAM)	P:GO:0009966; P:GO:0043666; P:GO:0055114; F:GO:0004864; F:GO:0005506; F:GO:0016705; F:GO:0020037	P:regulation of signal transduction; P:obsolete regulation of phosphoprotein phosphatase activity; P:obsolete oxidation-reduction process; F:protein phosphatase inhibitor activity; F:iron ion binding; F:oxidoreductase activity, acting on paired donors, with incorporation or reduction of molecular oxygen; F:heme binding
TRUE	INTERPRO, NO-BLAST	g15838.t1	---NA---	249									IPR009261 (PFAM)	no GO terms	no GO terms
TRUE	INTERPRO, BLASTED, MAPPED, ANNOTATED	g21890.t1	clade XI lectin receptor kinase	352	20	1.94119e-15	48.32	2	P:GO:0050896; F:GO:0016301	P:response to stimulus; F:kinase activity	EC:2.7	Transferring phosphorus-containing groups	IPR001220 (PFAM)	F:GO:0030246	F:carbohydrate binding
TRUE	INTERPRO, NO-BLAST	g1878.t1	---NA---	506									IPR001701 (PFAM)	P:GO:0005975; F:GO:0004553	P:carbohydrate metabolic process; F:hydrolase activity, hydrolyzing O-glycosyl compounds
TRUE	INTERPRO, NO-BLAST	g15073.t1	---NA---	251									IPR000782 (PFAM); IPR031375 (PFAM)	no GO terms	no GO terms
TRUE	INTERPRO, NO-BLAST	g25865.t1	---NA---	377									IPR000073 (PFAM)	no GO terms	no GO terms
TRUE	INTERPRO, NO-BLAST	g4815.t1	---NA---	372									IPR001087 (PFAM)	F:GO:0016788	F:hydrolase activity, acting on ester bonds
TRUE	INTERPRO, NO-BLAST	g5833.t1	---NA---	487									IPR012946 (PFAM); IPR000490 (PFAM)	P:GO:0005975; F:GO:0004553	P:carbohydrate metabolic process; F:hydrolase activity, hydrolyzing O-glycosyl compounds
TRUE	INTERPRO, NO-BLAST	g10310.t1	---NA---	378									IPR001087 (PFAM)	F:GO:0016788	F:hydrolase activity, acting on ester bonds
TRUE	INTERPRO, NO-BLAST	g43064.t1	---NA---	189									IPR016140 (PFAM)	no GO terms	no GO terms
TRUE	INTERPRO, BLASTED	g11926.t1	thaumatin-like protein 1	248	1	2.30973e-51	52.23						IPR001938 (PFAM); IPR032477 (PFAM)	no GO terms	no GO terms
TRUE	INTERPRO, BLASTED, MAPPED, ANNOTATED	g3221.t1	transcription factor DREB2a	217	7	2.12547e-22	71.55	6	P:GO:0006355; P:GO:0006952; P:GO:0009873; F:GO:0000976; F:GO:0003700; C:GO:0005634	P:regulation of DNA-templated transcription; P:defense response; P:ethylene-activated signaling pathway; F:transcription cis-regulatory region binding; F:DNA-binding transcription factor activity; C:nucleus			IPR001471 (PFAM)	P:GO:0006355; F:GO:0003700	P:regulation of DNA-templated transcription; F:DNA-binding transcription factor activity
TRUE	INTERPRO, NO-BLAST	g29795.t1	---NA---	224									IPR012881 (PFAM)	no GO terms	no GO terms
TRUE	INTERPRO, BLASTED, MAPPED	g9389.t1	TIP1	284	1	2.82539e-36	55.14	5	P:GO:0006833; P:GO:0055085; F:GO:0015250; F:GO:0015267; C:GO:0016020	P:water transport; P:transmembrane transport; F:water channel activity; F:channel activity; C:membrane			IPR000425 (PFAM)	P:GO:0006810; F:GO:0005215; C:GO:0016020	P:transport; F:transporter activity; C:membrane
TRUE	INTERPRO, BLASTED, MAPPED	g2966.t1	auxin-responsive protein IAA29	696	4	9.50371e-80	52.58	6	P:GO:0006355; P:GO:0009725; P:GO:0009734; F:GO:0003677; F:GO:0003700; C:GO:0005634	P:regulation of DNA-templated transcription; P:response to hormone; P:auxin-activated signaling pathway; F:DNA binding; F:DNA-binding transcription factor activity; C:nucleus			IPR003340 (PFAM); IPR033389 (PFAM); IPR010525 (PFAM)	P:GO:0006355; P:GO:0009725; F:GO:0003677; C:GO:0005634	P:regulation of DNA-templated transcription; P:response to hormone; F:DNA binding; C:nucleus
TRUE	INTERPRO, BLASTED	g58.t1	thaumatin-like protein 1	361	1	7.31332e-38	56.88						IPR001938 (PFAM); IPR032477 (PFAM)	no GO terms	no GO terms
TRUE	INTERPRO, BLASTED, MAPPED	g14306.t1	Lyk11	417	2	8.12622e-09	46.61	6	P:GO:0045087; F:GO:0004674; F:GO:0005524; F:GO:0019199; C:GO:0005886; C:GO:0016020	P:innate immune response; F:protein serine/threonine kinase activity; F:ATP binding; F:transmembrane receptor protein kinase activity; C:plasma membrane; C:membrane			IPR018392 (PFAM)	no GO terms	no GO terms
TRUE	INTERPRO, BLASTED, MAPPED	g31373.t1	nicotine N-demethylase	500	4	4.35402e-17	44.4	12	P:GO:0010268; P:GO:0016125; P:GO:0016132; P:GO:0032259; F:GO:0004497; F:GO:0004796; F:GO:0005506; F:GO:0008168; F:GO:0016705; F:GO:0020037; F:GO:0046872; C:GO:0016020	P:brassinosteroid homeostasis; P:sterol metabolic process; P:brassinosteroid biosynthetic process; P:methylation; F:monooxygenase activity; F:thromboxane-A synthase activity; F:iron ion binding; F:methyltransferase activity; F:oxidoreductase activity, acting on paired donors, with incorporation or reduction of molecular oxygen; F:heme binding; F:metal ion binding; C:membrane			IPR001128 (PFAM)	P:GO:0055114; F:GO:0005506; F:GO:0016705; F:GO:0020037	P:obsolete oxidation-reduction process; F:iron ion binding; F:oxidoreductase activity, acting on paired donors, with incorporation or reduction of molecular oxygen; F:heme binding
TRUE	INTERPRO, BLASTED, MAPPED, ANNOTATED	g9469.t1	putative glycosyltransferase	456	2	8.85001e-177	69.02	3	F:GO:0016758; C:GO:0005794; C:GO:0016020	F:hexosyltransferase activity; C:Golgi apparatus; C:membrane	EC:2.4.1	Glycosyltransferases	IPR008630 (PFAM); IPR004988 (PFAM)	F:GO:0016757; C:GO:0016020	F:glycosyltransferase activity; C:membrane
TRUE	INTERPRO, NO-BLAST	g30138.t1	---NA---	383									IPR008785 (PFAM); IPR006603 (PFAM)	C:GO:0019031	C:viral envelope
TRUE	INTERPRO, NO-BLAST	g9850.t1	---NA---	543									IPR001898 (PFAM)	P:GO:0006814; P:GO:0055085; F:GO:0005215; C:GO:0016020	P:sodium ion transport; P:transmembrane transport; F:transporter activity; C:membrane
TRUE	INTERPRO, NO-BLAST	g1824.t1	---NA---	562									IPR012951 (PFAM); IPR006094 (PFAM)	P:GO:0055114; F:GO:0016491; F:GO:0050660	P:obsolete oxidation-reduction process; F:oxidoreductase activity; F:flavin adenine dinucleotide binding
TRUE	INTERPRO, NO-BLAST	g31101.t1	---NA---	181									IPR012946 (PFAM)	no GO terms	no GO terms
TRUE	INTERPRO, NO-BLAST	g42846.t1	---NA---	416									IPR000782 (PFAM); IPR004927 (PFAM)	P:GO:0046413; F:GO:0018836	P:obsolete organomercury catabolic process; F:alkylmercury lyase activity
TRUE	INTERPRO, BLASTED, MAPPED	g23370.t1	Chain C, Membrane-localized LRR receptor-like protein	758	16	1.39274e-25	48.7	7	P:GO:0006952; P:GO:0051707; F:GO:0004672; F:GO:0004674; F:GO:0005524; F:GO:0016301; C:GO:0016020	P:defense response; P:response to other organism; F:protein kinase activity; F:protein serine/threonine kinase activity; F:ATP binding; F:kinase activity; C:membrane			IPR001611 (PFAM); IPR013210 (PFAM)	F:GO:0005515	F:protein binding
TRUE	INTERPRO, BLASTED, MAPPED, ANNOTATED	g9935.t1	clade XI lectin receptor kinase	647	20	9.13974e-166	55.32	4	P:GO:0050896; F:GO:0004672; F:GO:0005524; C:GO:0016020	P:response to stimulus; F:protein kinase activity; F:ATP binding; C:membrane	EC:2.7.1	Transferring phosphorus-containing groups	IPR001611 (PFAM); IPR007285 (PFAM); IPR000719 (PFAM); IPR013210 (PFAM); IPR029379 (PFAM); IPR012487 (PFAM); IPR007567 (PFAM); IPR003470 (PFAM); IPR006990 (PFAM); IPR027789 (PFAM)	P:GO:0006468; F:GO:0004672; F:GO:0005515; F:GO:0005524	P:protein phosphorylation; F:protein kinase activity; F:protein binding; F:ATP binding
TRUE	INTERPRO, NO-BLAST	g3864.t2	---NA---	348									no IPS match	no IPS match	no IPS match
TRUE	INTERPRO, NO-BLAST	g29463.t1	---NA---	409									IPR026057 (PFAM); IPR025846 (PFAM)	no GO terms	no GO terms
TRUE	INTERPRO, NO-BLAST	g27298.t1	---NA---	391									IPR001087 (PFAM); IPR007953 (PFAM); IPR010697 (PFAM)	F:GO:0016788	F:hydrolase activity, acting on ester bonds
TRUE	INTERPRO, BLASTED, MAPPED	g14851.t1	RecName: Full=Probable aspartic proteinase GIP2; AltName: Full=Glucanase inhibitor protein 2; Short=NbGIP2; Flags: Precursor	486	2	5.3222e-09	37.92	7	P:GO:0006508; P:GO:0006952; F:GO:0004190; C:GO:0005576; C:GO:0005794; C:GO:0005886; C:GO:0048046	P:proteolysis; P:defense response; F:aspartic-type endopeptidase activity; C:extracellular region; C:Golgi apparatus; C:plasma membrane; C:apoplast			IPR032799 (PFAM); IPR032861 (PFAM)	no GO terms	no GO terms
TRUE	INTERPRO, BLASTED, MAPPED	g24512.t1	Ascorbate oxidase	539	1	2.33257e-52	43.95	6	F:GO:0005507; F:GO:0008447; F:GO:0016491; F:GO:0046872; C:GO:0005576; C:GO:0009506	F:copper ion binding; F:L-ascorbate oxidase activity; F:oxidoreductase activity; F:metal ion binding; C:extracellular region; C:plasmodesma			IPR001117 (PFAM); IPR011706 (PFAM); IPR011707 (PFAM)	P:GO:0055114; F:GO:0005507; F:GO:0016491	P:obsolete oxidation-reduction process; F:copper ion binding; F:oxidoreductase activity
TRUE	INTERPRO, NO-BLAST	g18164.t1	---NA---	189									IPR003245 (PFAM)	F:GO:0009055	F:electron transfer activity
TRUE	INTERPRO, NO-BLAST	g16932.t1	---NA---	397									IPR002022 (PFAM)	no GO terms	no GO terms
TRUE	INTERPRO, BLASTED	g44752.t1	gibberellin-regulated protein 6	103	2	8.1283e-74	74.59						IPR003854 (PFAM)	no GO terms	no GO terms
TRUE	INTERPRO, NO-BLAST	g25919.t1	---NA---	500									IPR001701 (PFAM)	P:GO:0005975; F:GO:0004553	P:carbohydrate metabolic process; F:hydrolase activity, hydrolyzing O-glycosyl compounds
TRUE	INTERPRO, NO-BLAST	g14095.t1	---NA---	361									IPR024041 (PFAM)	P:GO:0072488; F:GO:0008519; C:GO:0016020	P:ammonium transmembrane transport; F:ammonium channel activity; C:membrane
TRUE	INTERPRO, NO-BLAST	g1627.t1	---NA---	181									IPR016140 (PFAM)	no GO terms	no GO terms
TRUE	INTERPRO, BLASTED, MAPPED, ANNOTATED	g36369.t1	subtilisin-like serine protease	764	12	0	63.81	1	F:GO:0008233	F:peptidase activity	EC:3.4	Acting on peptide bonds (peptidases)	IPR000209 (PFAM); IPR003137 (PFAM); IPR010259 (PFAM)	P:GO:0006508; F:GO:0004252	P:proteolysis; F:serine-type endopeptidase activity
TRUE	INTERPRO, BLASTED, MAPPED, ANNOTATED	g36370.t1	subtilisin-like serine protease	764	12	0	63.81	1	F:GO:0008233	F:peptidase activity	EC:3.4	Acting on peptide bonds (peptidases)	IPR000209 (PFAM); IPR003137 (PFAM); IPR010259 (PFAM)	P:GO:0006508; F:GO:0004252	P:proteolysis; F:serine-type endopeptidase activity
TRUE	INTERPRO, NO-BLAST	g16738.t1	---NA---	639									IPR013863 (PFAM); IPR001680 (PFAM)	F:GO:0005515	F:protein binding
TRUE	INTERPRO, NO-BLAST	g33356.t1	---NA---	471									IPR021892 (PFAM); IPR012946 (PFAM); IPR000490 (PFAM)	P:GO:0005975; F:GO:0004553; F:GO:0017111	P:carbohydrate metabolic process; F:hydrolase activity, hydrolyzing O-glycosyl compounds; F:ribonucleoside triphosphate phosphatase activity
TRUE	INTERPRO, BLASTED, MAPPED, ANNOTATED	g25744.t1	LRR receptor-like serine/threonine-protein kinase FEI 2	652	20	8.27661e-110	56.58	4	P:GO:0050896; F:GO:0004672; F:GO:0005488; C:GO:0016020	P:response to stimulus; F:protein kinase activity; F:binding; C:membrane	EC:2.7.1	Transferring phosphorus-containing groups	IPR027936 (PFAM); IPR013210 (PFAM); IPR006990 (PFAM); IPR032558 (PFAM); IPR007775 (PFAM); IPR001611 (PFAM); IPR000719 (PFAM)	P:GO:0000902; P:GO:0006468; P:GO:0006955; F:GO:0004672; F:GO:0005515; F:GO:0005524; C:GO:0016020	P:cell morphogenesis; P:protein phosphorylation; P:immune response; F:protein kinase activity; F:protein binding; F:ATP binding; C:membrane
TRUE	INTERPRO, BLASTED, MAPPED, ANNOTATED	g29808.t1	papain-like cysteine proteinase	505	11	0	63.1	4	P:GO:0051603; F:GO:0004197; C:GO:0005615; C:GO:0005764	P:proteolysis involved in protein catabolic process; F:cysteine-type endopeptidase activity; C:extracellular space; C:lysosome	EC:3.4.22	Acting on peptide bonds (peptidases)	IPR013201 (PFAM); IPR000118 (PFAM); IPR000668 (PFAM)	P:GO:0006508; F:GO:0008234	P:proteolysis; F:cysteine-type peptidase activity
TRUE	INTERPRO, NO-BLAST	g12885.t1	---NA---	693									PF13641 (PFAM)	no GO terms	no GO terms
TRUE	INTERPRO, BLASTED, MAPPED, ANNOTATED	g26300.t1	nicotine N-demethylase	354	4	4.01203e-35	51.68	1	F:GO:0003824	F:catalytic activity			IPR001128 (PFAM)	P:GO:0055114; F:GO:0005506; F:GO:0016705; F:GO:0020037	P:obsolete oxidation-reduction process; F:iron ion binding; F:oxidoreductase activity, acting on paired donors, with incorporation or reduction of molecular oxygen; F:heme binding
TRUE	INTERPRO, BLASTED, MAPPED, ANNOTATED	g24948.t1	cellulose synthase	751	1	4.94247e-39	64.57	2	F:GO:0016757; C:GO:0110165	F:glycosyltransferase activity; C:cellular anatomical structure	EC:2.4	Glycosyltransferases	IPR005150 (PFAM)	P:GO:0030244; F:GO:0016760; C:GO:0016020	P:cellulose biosynthetic process; F:cellulose synthase (UDP-forming) activity; C:membrane
TRUE	INTERPRO, NO-BLAST	g45715.t1	---NA---	141									IPR006814 (PFAM)	P:GO:0015979; C:GO:0009523; C:GO:0009654; C:GO:0042651	P:photosynthesis; C:photosystem II; C:photosystem II oxygen evolving complex; C:thylakoid membrane
TRUE	INTERPRO, NO-BLAST	g37861.t1	---NA---	613									IPR019028 (PFAM); IPR001701 (PFAM)	P:GO:0005975; F:GO:0004553; F:GO:0030246	P:carbohydrate metabolic process; F:hydrolase activity, hydrolyzing O-glycosyl compounds; F:carbohydrate binding
TRUE	INTERPRO, NO-BLAST	g28253.t1	---NA---	166									IPR008783 (PFAM); IPR003452 (PFAM); IPR025443 (PFAM); IPR026112 (PFAM); IPR025376 (PFAM)	P:GO:0007155; F:GO:0005173; C:GO:0016020; C:GO:0016020	P:cell adhesion; F:stem cell factor receptor binding; C:membrane; C:membrane
TRUE	INTERPRO, NO-BLAST	g12087.t1	---NA---	420									IPR013217 (PFAM); IPR004159 (PFAM)	F:GO:0008168	F:methyltransferase activity
TRUE	INTERPRO, NO-BLAST	g16545.t1	---NA---	386									IPR000620 (PFAM)	C:GO:0016020; C:GO:0016020	C:membrane; C:membrane
TRUE	INTERPRO, NO-BLAST	g20733.t1	---NA---	198									IPR003245 (PFAM)	F:GO:0009055	F:electron transfer activity
TRUE	INTERPRO, NO-BLAST	g21732.t1	---NA---	598									IPR002116 (PFAM); IPR000109 (PFAM)	P:GO:0006810; F:GO:0004860; F:GO:0005215; C:GO:0005576; C:GO:0016020	P:transport; F:protein kinase inhibitor activity; F:transporter activity; C:extracellular region; C:membrane
TRUE	INTERPRO, NO-BLAST	g26930.t1	---NA---	320									IPR002347 (PFAM)	no GO terms	no GO terms
TRUE	INTERPRO, BLASTED, MAPPED	g22324.t1	nicotine N-demethylase	538	3	5.6006e-16	45.45	9	P:GO:0032259; F:GO:0004497; F:GO:0004796; F:GO:0005506; F:GO:0008168; F:GO:0016705; F:GO:0020037; F:GO:0046872; C:GO:0016020	P:methylation; F:monooxygenase activity; F:thromboxane-A synthase activity; F:iron ion binding; F:methyltransferase activity; F:oxidoreductase activity, acting on paired donors, with incorporation or reduction of molecular oxygen; F:heme binding; F:metal ion binding; C:membrane			IPR001128 (PFAM)	P:GO:0055114; F:GO:0005506; F:GO:0016705; F:GO:0020037	P:obsolete oxidation-reduction process; F:iron ion binding; F:oxidoreductase activity, acting on paired donors, with incorporation or reduction of molecular oxygen; F:heme binding
TRUE	INTERPRO, NO-BLAST	g33252.t1	---NA---	166									PF10914 (PFAM)	no GO terms	no GO terms
TRUE	INTERPRO, NO-BLAST	g27192.t1	---NA---	257									IPR007671 (PFAM); PF01190 (PFAM)	no GO terms	no GO terms
TRUE	INTERPRO, BLASTED, MAPPED, ANNOTATED	g7074.t2	putative boron transporter	717	1	0	99.86	6	P:GO:0006820; P:GO:0035445; P:GO:0050801; F:GO:0005452; F:GO:0046715; C:GO:0005886	P:monoatomic anion transport; P:borate transmembrane transport; P:monoatomic ion homeostasis; F:solute:inorganic anion antiporter activity; F:active borate transmembrane transporter activity; C:plasma membrane			IPR011531 (PFAM)	P:GO:0006820; C:GO:0016020	P:monoatomic anion transport; C:membrane
TRUE	INTERPRO, BLASTED, MAPPED, ANNOTATED	g31243.t1	clade VIII lectin receptor kinase	601	20	0	58.88	2	P:GO:0050896; F:GO:0016301	P:response to stimulus; F:kinase activity	EC:2.7	Transferring phosphorus-containing groups	IPR027916 (PFAM); IPR010605 (PFAM); IPR000719 (PFAM); IPR021279 (PFAM); IPR001611 (PFAM); IPR013210 (PFAM); IPR027789 (PFAM)	P:GO:0006468; F:GO:0004672; F:GO:0005515; F:GO:0005524	P:protein phosphorylation; F:protein kinase activity; F:protein binding; F:ATP binding
TRUE	INTERPRO, NO-BLAST	g42380.t1	---NA---	214									IPR009038 (PFAM); IPR024932 (PFAM); IPR021110 (PFAM); IPR024282 (PFAM); IPR015386 (PFAM)	P:GO:0006810; P:GO:0006886; P:GO:0006955; P:GO:0017013; P:GO:0019882; F:GO:0042289; C:GO:0016020; C:GO:0016020	P:transport; P:intracellular protein transport; P:immune response; P:protein flavinylation; P:antigen processing and presentation; F:MHC class II protein binding; C:membrane; C:membrane
TRUE	INTERPRO, BLASTED, MAPPED	g1877.t1	pectin methyl-esterase	563	2	2.92233e-170	56.87	8	P:GO:0042545; P:GO:0045490; P:GO:0071555; F:GO:0004857; F:GO:0030599; F:GO:0045330; F:GO:0046910; C:GO:0005576	P:cell wall modification; P:pectin catabolic process; P:cell wall organization; F:enzyme inhibitor activity; F:pectinesterase activity; F:obsolete aspartyl esterase activity; F:pectinesterase inhibitor activity; C:extracellular region			IPR000070 (PFAM); IPR006501 (PFAM)	P:GO:0042545; F:GO:0004857; F:GO:0030599; C:GO:0005618	P:cell wall modification; F:enzyme inhibitor activity; F:pectinesterase activity; C:cell wall
TRUE	INTERPRO, NO-BLAST	g11043.t1	---NA---	729									IPR003674 (PFAM)	P:GO:0006486; F:GO:0004576; C:GO:0016020	P:protein glycosylation; F:oligosaccharyl transferase activity; C:membrane
TRUE	INTERPRO, BLASTED, MAPPED	g4558.t1	RecName: Full=Probable aspartic proteinase GIP2; AltName: Full=Glucanase inhibitor protein 2; Short=NbGIP2; Flags: Precursor	474	2	1.30292e-12	41.02	7	P:GO:0006508; P:GO:0006952; F:GO:0004190; C:GO:0005576; C:GO:0005794; C:GO:0005886; C:GO:0048046	P:proteolysis; P:defense response; F:aspartic-type endopeptidase activity; C:extracellular region; C:Golgi apparatus; C:plasma membrane; C:apoplast			IPR032799 (PFAM); IPR032861 (PFAM)	no GO terms	no GO terms
TRUE	INTERPRO, NO-BLAST	g31970.t1	---NA---	327									PF13469 (PFAM); IPR000863 (PFAM)	F:GO:0008146	F:sulfotransferase activity
TRUE	INTERPRO, NO-BLAST	g27389.t1	---NA---	363									IPR001087 (PFAM)	F:GO:0016788	F:hydrolase activity, acting on ester bonds
TRUE	INTERPRO, NO-BLAST	g35800.t1	---NA---	168									IPR008914 (PFAM)	no GO terms	no GO terms
TRUE	INTERPRO, NO-BLAST	g40433.t1	---NA---	121									IPR016140 (PFAM)	no GO terms	no GO terms
TRUE	INTERPRO, NO-BLAST	g31919.t1	---NA---	350									IPR006766 (PFAM)	no GO terms	no GO terms
TRUE	INTERPRO, BLASTED, MAPPED, ANNOTATED	g13048.t1	TIP1	250	1	5.30254e-83	73.68	2	P:GO:0006810; F:GO:0015267	P:transport; F:channel activity			IPR000425 (PFAM)	P:GO:0006810; F:GO:0005215; C:GO:0016020	P:transport; F:transporter activity; C:membrane
TRUE	INTERPRO, NO-BLAST	g8839.t1	---NA---	474									IPR000743 (PFAM)	P:GO:0005975; F:GO:0004650	P:carbohydrate metabolic process; F:polygalacturonase activity
TRUE	INTERPRO, BLASTED, MAPPED, ANNOTATED	g21133.t1	TIP1	251	1	4.45938e-132	84.92	4	P:GO:0006833; P:GO:0055085; F:GO:0015250; C:GO:0016020	P:water transport; P:transmembrane transport; F:water channel activity; C:membrane			IPR000425 (PFAM)	P:GO:0006810; F:GO:0005215; C:GO:0016020	P:transport; F:transporter activity; C:membrane
TRUE	INTERPRO, NO-BLAST	g22872.t1	---NA---	525									PF12669 (PFAM); IPR001701 (PFAM)	P:GO:0005975; F:GO:0004553	P:carbohydrate metabolic process; F:hydrolase activity, hydrolyzing O-glycosyl compounds
TRUE	INTERPRO, NO-BLAST	g40534.t1	---NA---	201									IPR012946 (PFAM)	no GO terms	no GO terms
TRUE	INTERPRO, NO-BLAST	g38782.t1	---NA---	370									IPR000490 (PFAM)	P:GO:0005975; F:GO:0004553	P:carbohydrate metabolic process; F:hydrolase activity, hydrolyzing O-glycosyl compounds
TRUE	INTERPRO, BLASTED, MAPPED	g654.t1	TIP1	285	1	3.57282e-33	55.6	5	P:GO:0006833; P:GO:0055085; F:GO:0015250; F:GO:0015267; C:GO:0016020	P:water transport; P:transmembrane transport; F:water channel activity; F:channel activity; C:membrane			IPR000425 (PFAM)	P:GO:0006810; F:GO:0005215; C:GO:0016020	P:transport; F:transporter activity; C:membrane
TRUE	INTERPRO, NO-BLAST	g17708.t1	---NA---	466									IPR022014 (PFAM); IPR012946 (PFAM); IPR000490 (PFAM)	P:GO:0005975; F:GO:0004553	P:carbohydrate metabolic process; F:hydrolase activity, hydrolyzing O-glycosyl compounds
TRUE	INTERPRO, BLASTED, MAPPED	g42235.t1	RecName: Full=Probable aspartic proteinase GIP2; AltName: Full=Glucanase inhibitor protein 2; Short=NbGIP2; Flags: Precursor	453	2	1.1374e-21	41.28	7	P:GO:0006508; P:GO:0006952; F:GO:0004190; C:GO:0005576; C:GO:0005794; C:GO:0005886; C:GO:0048046	P:proteolysis; P:defense response; F:aspartic-type endopeptidase activity; C:extracellular region; C:Golgi apparatus; C:plasma membrane; C:apoplast			IPR032861 (PFAM); IPR032799 (PFAM)	no GO terms	no GO terms
TRUE	INTERPRO, NO-BLAST	g15227.t1	---NA---	340									IPR013658 (PFAM); IPR018119 (PFAM); IPR001258 (PFAM); IPR008557 (PFAM)	P:GO:0009058; F:GO:0005515; F:GO:0016844	P:biosynthetic process; F:protein binding; F:strictosidine synthase activity
TRUE	INTERPRO, BLASTED, MAPPED, ANNOTATED	g24069.t1	clade VIII lectin receptor kinase	618	20	1.35714e-63	53.36	1	P:GO:0050896	P:response to stimulus			IPR013210 (PFAM); IPR001245 (PFAM); IPR025875 (PFAM)	P:GO:0006468; F:GO:0004672	P:protein phosphorylation; F:protein kinase activity
TRUE	INTERPRO, BLASTED, MAPPED, ANNOTATED	g22038.t1	polyphenol oxidase	588	2	0	91.49	4	P:GO:0046148; F:GO:0004097; F:GO:0046872; C:GO:0009543	P:pigment biosynthetic process; F:catechol oxidase activity; F:metal ion binding; C:chloroplast thylakoid lumen	EC:1.10.3.1	catechol oxidase	IPR022740 (PFAM); IPR002227 (PFAM); IPR022739 (PFAM)	P:GO:0008152; P:GO:0055114; F:GO:0004097; F:GO:0016491	P:metabolic process; P:obsolete oxidation-reduction process; F:catechol oxidase activity; F:oxidoreductase activity
TRUE	INTERPRO, NO-BLAST	g44566.t1	---NA---	508									IPR001701 (PFAM)	P:GO:0005975; F:GO:0004553	P:carbohydrate metabolic process; F:hydrolase activity, hydrolyzing O-glycosyl compounds
TRUE	INTERPRO, NO-BLAST	g9993.t1	---NA---	374									IPR025846 (PFAM); IPR026057 (PFAM)	no GO terms	no GO terms
TRUE	INTERPRO, BLASTED, MAPPED, ANNOTATED	g5568.t1	TIP1	259	1	1.63268e-102	71.71	2	P:GO:0006810; F:GO:0015267	P:transport; F:channel activity			IPR000425 (PFAM); IPR004101 (PFAM)	P:GO:0006810; P:GO:0009058; F:GO:0005215; F:GO:0005524; F:GO:0016874; C:GO:0016020	P:transport; P:biosynthetic process; F:transporter activity; F:ATP binding; F:ligase activity; C:membrane
TRUE	INTERPRO, BLASTED	g27290.t1	ascorbate peroxidase	282	1	3.0874e-10	41.7						IPR002016 (PFAM)	P:GO:0006979; P:GO:0055114; F:GO:0004601; F:GO:0020037	P:response to oxidative stress; P:obsolete oxidation-reduction process; F:peroxidase activity; F:heme binding
TRUE	INTERPRO, BLASTED, MAPPED	g10979.t1	nicotine N-demethylase	375	4	6.02446e-14	44.6	12	P:GO:0010268; P:GO:0016125; P:GO:0016132; P:GO:0032259; F:GO:0004497; F:GO:0004796; F:GO:0005506; F:GO:0008168; F:GO:0016705; F:GO:0020037; F:GO:0046872; C:GO:0016020	P:brassinosteroid homeostasis; P:sterol metabolic process; P:brassinosteroid biosynthetic process; P:methylation; F:monooxygenase activity; F:thromboxane-A synthase activity; F:iron ion binding; F:methyltransferase activity; F:oxidoreductase activity, acting on paired donors, with incorporation or reduction of molecular oxygen; F:heme binding; F:metal ion binding; C:membrane			IPR001128 (PFAM)	P:GO:0055114; F:GO:0005506; F:GO:0016705; F:GO:0020037	P:obsolete oxidation-reduction process; F:iron ion binding; F:oxidoreductase activity, acting on paired donors, with incorporation or reduction of molecular oxygen; F:heme binding
TRUE	INTERPRO, NO-BLAST	g17406.t1	---NA---	434									IPR009637 (PFAM); IPR025328 (PFAM)	C:GO:0016020	C:membrane
TRUE	INTERPRO, BLASTED, MAPPED	g19560.t1	trypsin proteinase inhibitor precursor	80	1	1.29288e-11	66.25	1	F:GO:0004867	F:serine-type endopeptidase inhibitor activity			IPR003465 (PFAM)	F:GO:0004867	F:serine-type endopeptidase inhibitor activity
TRUE	INTERPRO, NO-BLAST	g37583.t1	---NA---	267									no IPS match	no IPS match	no IPS match
TRUE	INTERPRO, BLASTED	g17759.t1	ascorbate peroxidase	317	1	5.07972e-09	41.01						IPR002016 (PFAM)	P:GO:0006979; P:GO:0055114; F:GO:0004601; F:GO:0020037	P:response to oxidative stress; P:obsolete oxidation-reduction process; F:peroxidase activity; F:heme binding
TRUE	INTERPRO, NO-BLAST	g19646.t1	---NA---	167									IPR007493 (PFAM)	no GO terms	no GO terms
TRUE	INTERPRO, BLASTED, MAPPED	g30036.t1	nicotine N-demethylase	510	4	9.49285e-47	47.6	12	P:GO:0010268; P:GO:0016125; P:GO:0016132; P:GO:0032259; F:GO:0004497; F:GO:0004796; F:GO:0005506; F:GO:0008168; F:GO:0016705; F:GO:0020037; F:GO:0046872; C:GO:0016020	P:brassinosteroid homeostasis; P:sterol metabolic process; P:brassinosteroid biosynthetic process; P:methylation; F:monooxygenase activity; F:thromboxane-A synthase activity; F:iron ion binding; F:methyltransferase activity; F:oxidoreductase activity, acting on paired donors, with incorporation or reduction of molecular oxygen; F:heme binding; F:metal ion binding; C:membrane			IPR001128 (PFAM)	P:GO:0055114; F:GO:0005506; F:GO:0016705; F:GO:0020037	P:obsolete oxidation-reduction process; F:iron ion binding; F:oxidoreductase activity, acting on paired donors, with incorporation or reduction of molecular oxygen; F:heme binding
TRUE	INTERPRO, NO-BLAST	g44920.t1	---NA---	627									IPR002772 (PFAM); IPR001764 (PFAM)	P:GO:0005975; F:GO:0004553	P:carbohydrate metabolic process; F:hydrolase activity, hydrolyzing O-glycosyl compounds
TRUE	INTERPRO, NO-BLAST	g1345.t1	---NA---	125									IPR003245 (PFAM)	F:GO:0009055	F:electron transfer activity
TRUE	INTERPRO, NO-BLAST	g44837.t1	---NA---	99									no IPS match	no IPS match	no IPS match
TRUE	INTERPRO, NO-BLAST	g28395.t1	---NA---	415									IPR000909 (PFAM)	no GO terms	no GO terms
TRUE	INTERPRO, NO-BLAST	g12332.t1	---NA---	375									IPR004254 (PFAM)	C:GO:0016020	C:membrane
TRUE	INTERPRO, NO-BLAST	g16371.t1	---NA---	372									IPR006946 (PFAM)	no GO terms	no GO terms
TRUE	INTERPRO, BLASTED, MAPPED	g28871.t1	chalcone synthase	496	2	2.94822e-09	42.88	7	P:GO:0009058; P:GO:0009813; P:GO:0030639; F:GO:0016210; F:GO:0016746; F:GO:0016747; F:GO:0102128	P:biosynthetic process; P:flavonoid biosynthetic process; P:polyketide biosynthetic process; F:naringenin-chalcone synthase activity; F:acyltransferase activity; F:acyltransferase activity, transferring groups other than amino-acyl groups; F:obsolete chalcone synthase activity			IPR013747 (PFAM); IPR013601 (PFAM); IPR005538 (PFAM)	P:GO:0006633; F:GO:0016747; C:GO:0016020; C:GO:0016020	P:fatty acid biosynthetic process; F:acyltransferase activity, transferring groups other than amino-acyl groups; C:membrane; C:membrane
TRUE	INTERPRO, NO-BLAST	g30901.t1	---NA---	225									no IPS match	no IPS match	no IPS match
TRUE	INTERPRO, NO-BLAST	g5180.t2	---NA---	587									IPR002562 (PFAM)	P:GO:0006139; F:GO:0003676; F:GO:0008408	P:nucleobase-containing compound metabolic process; F:nucleic acid binding; F:3'-5' exonuclease activity
TRUE	INTERPRO, NO-BLAST	g21473.t1	---NA---	240									no IPS match	no IPS match	no IPS match
TRUE	INTERPRO, NO-BLAST	g2595.t1	---NA---	348									IPR004853 (PFAM)	no GO terms	no GO terms
TRUE	INTERPRO, NO-BLAST	g10572.t1	---NA---	699									no IPS match	no IPS match	no IPS match
TRUE	INTERPRO, BLASTED, MAPPED	g29776.t1	clade VIII lectin receptor kinase	831	20	0	58.66	9	P:GO:0002229; P:GO:0042742; F:GO:0004672; F:GO:0004674; F:GO:0005524; F:GO:0016301; F:GO:0030246; C:GO:0005886; C:GO:0016020	P:defense response to oomycetes; P:defense response to bacterium; F:protein kinase activity; F:protein serine/threonine kinase activity; F:ATP binding; F:kinase activity; F:carbohydrate binding; C:plasma membrane; C:membrane			IPR001480 (PFAM); IPR000719 (PFAM); IPR003609 (PFAM)	P:GO:0006468; F:GO:0004672; F:GO:0005524	P:protein phosphorylation; F:protein kinase activity; F:ATP binding
TRUE	INTERPRO, NO-BLAST	g18881.t1	---NA---	386									IPR012946 (PFAM); IPR000490 (PFAM)	P:GO:0005975; F:GO:0004553	P:carbohydrate metabolic process; F:hydrolase activity, hydrolyzing O-glycosyl compounds
TRUE	INTERPRO, BLASTED	g29207.t1	thaumatin-like protein 1	306	1	8.92702e-51	52.42						IPR001938 (PFAM); IPR032477 (PFAM)	no GO terms	no GO terms
TRUE	INTERPRO, NO-BLAST	g12172.t1	---NA---	552									IPR018499 (PFAM); IPR018702 (PFAM); IPR005821 (PFAM); IPR019676 (PFAM)	P:GO:0006811; P:GO:0055085; F:GO:0005216; C:GO:0016020; C:GO:0016020	P:monoatomic ion transport; P:transmembrane transport; F:monoatomic ion channel activity; C:membrane; C:membrane
TRUE	INTERPRO, BLASTED, MAPPED	g10693.t1	PR16-1	208	1	1.09788e-36	59.04	6	P:GO:0010497; P:GO:2000280; F:GO:0030145; F:GO:0046872; C:GO:0009506; C:GO:0048046	P:plasmodesmata-mediated intercellular transport; P:regulation of root development; F:manganese ion binding; F:metal ion binding; C:plasmodesma; C:apoplast			IPR006045 (PFAM)	F:GO:0045735	F:nutrient reservoir activity
TRUE	INTERPRO, NO-BLAST	g4171.t1	---NA---	362									IPR008480 (PFAM); IPR005899 (PFAM); IPR025520 (PFAM); IPR004855 (PFAM)	P:GO:0006367; P:GO:0036376; F:GO:0008948; F:GO:0015081; C:GO:0005672; C:GO:0016020	P:transcription initiation at RNA polymerase II promoter; P:sodium ion export across plasma membrane; F:oxaloacetate decarboxylase activity; F:sodium ion transmembrane transporter activity; C:transcription factor TFIIA complex; C:membrane
TRUE	INTERPRO, NO-BLAST	g41019.t1	---NA---	398									IPR027470 (PFAM); IPR002524 (PFAM)	P:GO:0006812; P:GO:0055085; F:GO:0008324; C:GO:0016020	P:monoatomic cation transport; P:transmembrane transport; F:monoatomic cation transmembrane transporter activity; C:membrane
TRUE	INTERPRO, NO-BLAST	g4265.t1	---NA---	198									IPR003245 (PFAM)	F:GO:0009055	F:electron transfer activity
TRUE	INTERPRO, BLASTED, MAPPED	g29316.t1	nicotine N-demethylase	490	4	6.06378e-44	46.27	12	P:GO:0010268; P:GO:0016125; P:GO:0016132; P:GO:0032259; F:GO:0004497; F:GO:0004796; F:GO:0005506; F:GO:0008168; F:GO:0016705; F:GO:0020037; F:GO:0046872; C:GO:0016020	P:brassinosteroid homeostasis; P:sterol metabolic process; P:brassinosteroid biosynthetic process; P:methylation; F:monooxygenase activity; F:thromboxane-A synthase activity; F:iron ion binding; F:methyltransferase activity; F:oxidoreductase activity, acting on paired donors, with incorporation or reduction of molecular oxygen; F:heme binding; F:metal ion binding; C:membrane			IPR001128 (PFAM)	P:GO:0055114; F:GO:0005506; F:GO:0016705; F:GO:0020037	P:obsolete oxidation-reduction process; F:iron ion binding; F:oxidoreductase activity, acting on paired donors, with incorporation or reduction of molecular oxygen; F:heme binding
TRUE	INTERPRO, BLASTED, MAPPED, ANNOTATED	g24880.t1	MYB transcription factor	241	8	4.91494e-56	71.71	2	P:GO:0006355; F:GO:0000976	P:regulation of DNA-templated transcription; F:transcription cis-regulatory region binding			IPR029168 (PFAM); IPR020133 (PFAM); IPR001005 (PFAM); PF13921 (PFAM); IPR021661 (PFAM)	no GO terms	no GO terms
TRUE	INTERPRO, BLASTED, MAPPED, ANNOTATED	g5619.t1	heat shock protein 70	667	10	0	80.03	8	P:GO:0006457; P:GO:0006616; F:GO:0005524; F:GO:0140662; C:GO:0005634; C:GO:0005788; C:GO:0005829; C:GO:0005886	P:protein folding; P:SRP-dependent cotranslational protein targeting to membrane, translocation; F:ATP binding; F:ATP-dependent protein folding chaperone; C:nucleus; C:endoplasmic reticulum lumen; C:cytosol; C:plasma membrane			IPR009290 (PFAM); IPR013126 (PFAM); IPR032065 (PFAM); IPR012031 (PFAM)	no GO terms	no GO terms
TRUE	INTERPRO, NO-BLAST	g41191.t1	---NA---	605									IPR000276 (PFAM); IPR000109 (PFAM)	P:GO:0006810; P:GO:0007186; F:GO:0004930; F:GO:0005215; C:GO:0016020; C:GO:0016020	P:transport; P:G protein-coupled receptor signaling pathway; F:G protein-coupled receptor activity; F:transporter activity; C:membrane; C:membrane
TRUE	INTERPRO, NO-BLAST	g14266.t1	---NA---	472									IPR001563 (PFAM); IPR009433 (PFAM)	P:GO:0006508; P:GO:0016032; F:GO:0004185; F:GO:0005198; C:GO:0016020	P:proteolysis; P:viral process; F:serine-type carboxypeptidase activity; F:structural molecule activity; C:membrane
TRUE	INTERPRO, NO-BLAST	g24180.t1	---NA---	505									IPR000743 (PFAM); IPR024535 (PFAM)	P:GO:0005975; F:GO:0004650	P:carbohydrate metabolic process; F:polygalacturonase activity
TRUE	INTERPRO, BLASTED, MAPPED	g44728.t1	nicotine N-demethylase	505	3	5.87013e-55	51.6	9	P:GO:0032259; F:GO:0004497; F:GO:0004796; F:GO:0005506; F:GO:0008168; F:GO:0016705; F:GO:0020037; F:GO:0046872; C:GO:0016020	P:methylation; F:monooxygenase activity; F:thromboxane-A synthase activity; F:iron ion binding; F:methyltransferase activity; F:oxidoreductase activity, acting on paired donors, with incorporation or reduction of molecular oxygen; F:heme binding; F:metal ion binding; C:membrane			IPR001128 (PFAM)	P:GO:0055114; F:GO:0005506; F:GO:0016705; F:GO:0020037	P:obsolete oxidation-reduction process; F:iron ion binding; F:oxidoreductase activity, acting on paired donors, with incorporation or reduction of molecular oxygen; F:heme binding
TRUE	INTERPRO, BLASTED, MAPPED	g39020.t1	Ascorbate oxidase	595	1	3.89669e-50	45.44	6	F:GO:0005507; F:GO:0008447; F:GO:0016491; F:GO:0046872; C:GO:0005576; C:GO:0009506	F:copper ion binding; F:L-ascorbate oxidase activity; F:oxidoreductase activity; F:metal ion binding; C:extracellular region; C:plasmodesma			IPR011707 (PFAM); IPR011706 (PFAM); IPR001117 (PFAM); IPR029111 (PFAM)	P:GO:0055114; F:GO:0005507; F:GO:0016491	P:obsolete oxidation-reduction process; F:copper ion binding; F:oxidoreductase activity
TRUE	INTERPRO, BLASTED, MAPPED	g34381.t1	Lyk11	417	2	6.7044e-09	47.23	6	P:GO:0045087; F:GO:0004674; F:GO:0005524; F:GO:0019199; C:GO:0005886; C:GO:0016020	P:innate immune response; F:protein serine/threonine kinase activity; F:ATP binding; F:transmembrane receptor protein kinase activity; C:plasma membrane; C:membrane			IPR018392 (PFAM)	no GO terms	no GO terms
TRUE	INTERPRO, NO-BLAST	g17370.t1	---NA---	587									IPR000109 (PFAM); IPR029164 (PFAM)	P:GO:0006810; F:GO:0005215; C:GO:0016020	P:transport; F:transporter activity; C:membrane
TRUE	INTERPRO, NO-BLAST	g8012.t1	---NA---	143									IPR000167 (PFAM); IPR027911 (PFAM)	P:GO:0006950; P:GO:0009415	P:response to stress; P:response to water
TRUE	INTERPRO, BLASTED, MAPPED, ANNOTATED	g9889.t1	clade VIII lectin receptor kinase	643	20	5.90319e-74	61.06	1	F:GO:0016301	F:kinase activity	EC:2.7	Transferring phosphorus-containing groups	IPR014805 (PFAM); IPR002902 (PFAM); IPR027789 (PFAM); IPR001245 (PFAM); IPR007567 (PFAM)	P:GO:0006468; F:GO:0004672	P:protein phosphorylation; F:protein kinase activity
TRUE	INTERPRO, NO-BLAST	g33261.t1	---NA---	575									IPR006254 (PFAM)	P:GO:0019752; F:GO:0004451	P:carboxylic acid metabolic process; F:isocitrate lyase activity
TRUE	INTERPRO, BLASTED, MAPPED	g27577.t1	chalcone synthase	496	2	3.50121e-10	40.96	7	P:GO:0009058; P:GO:0009813; P:GO:0030639; F:GO:0016210; F:GO:0016746; F:GO:0016747; F:GO:0102128	P:biosynthetic process; P:flavonoid biosynthetic process; P:polyketide biosynthetic process; F:naringenin-chalcone synthase activity; F:acyltransferase activity; F:acyltransferase activity, transferring groups other than amino-acyl groups; F:obsolete chalcone synthase activity			IPR013601 (PFAM); IPR013747 (PFAM)	P:GO:0006633; F:GO:0016747; C:GO:0016020	P:fatty acid biosynthetic process; F:acyltransferase activity, transferring groups other than amino-acyl groups; C:membrane
TRUE	INTERPRO, NO-BLAST	g42689.t1	---NA---	385									IPR001087 (PFAM)	F:GO:0016788	F:hydrolase activity, acting on ester bonds
TRUE	INTERPRO, BLASTED, MAPPED, ANNOTATED	g32293.t1	clade XI lectin receptor kinase	350	20	2.74939e-16	47.49	2	P:GO:0050896; F:GO:0016301	P:response to stimulus; F:kinase activity	EC:2.7	Transferring phosphorus-containing groups	IPR001220 (PFAM)	F:GO:0030246	F:carbohydrate binding
TRUE	INTERPRO, BLASTED	g21355.t1	thaumatin-like protein 1	253	1	4.36707e-41	51.8						IPR001938 (PFAM)	no GO terms	no GO terms
TRUE	INTERPRO, NO-BLAST	g7664.t1	---NA---	260									IPR009009 (PFAM); IPR007117 (PFAM)	no GO terms	no GO terms
TRUE	INTERPRO, NO-BLAST	g4968.t2	---NA---	448									IPR000743 (PFAM)	P:GO:0005975; F:GO:0004650	P:carbohydrate metabolic process; F:polygalacturonase activity
TRUE	INTERPRO, NO-BLAST	g30148.t1	---NA---	700									IPR005200 (PFAM)	F:GO:0052861	F:endo-1,3(4)-beta-glucanase activity
TRUE	INTERPRO, NO-BLAST	g33357.t1	---NA---	403									IPR005018 (PFAM); IPR020490 (PFAM); IPR002810 (PFAM); IPR005018 (PFAM); IPR006593 (PFAM)	no GO terms	no GO terms
TRUE	INTERPRO, BLASTED, MAPPED	g44883.t1	RecName: Full=Probable aspartic proteinase GIP2; AltName: Full=Glucanase inhibitor protein 2; Short=NbGIP2; Flags: Precursor	458	2	1.74909e-19	40.47	7	P:GO:0006508; P:GO:0006952; F:GO:0004190; C:GO:0005576; C:GO:0005794; C:GO:0005886; C:GO:0048046	P:proteolysis; P:defense response; F:aspartic-type endopeptidase activity; C:extracellular region; C:Golgi apparatus; C:plasma membrane; C:apoplast			IPR032861 (PFAM); IPR032799 (PFAM)	no GO terms	no GO terms
TRUE	INTERPRO, BLASTED, MAPPED, ANNOTATED	g10462.t1	transcription factor DREB2a	216	6	4.83345e-10	69.35	3	P:GO:0050794; P:GO:0050896; F:GO:0003677	P:regulation of cellular process; P:response to stimulus; F:DNA binding			IPR001471 (PFAM)	P:GO:0006355; F:GO:0003700	P:regulation of DNA-templated transcription; F:DNA-binding transcription factor activity
TRUE	INTERPRO, BLASTED, MAPPED	g14805.t1	RecName: Full=Probable aspartic proteinase GIP2; AltName: Full=Glucanase inhibitor protein 2; Short=NbGIP2; Flags: Precursor	449	2	8.29408e-21	39.88	7	P:GO:0006508; P:GO:0006952; F:GO:0004190; C:GO:0005576; C:GO:0005794; C:GO:0005886; C:GO:0048046	P:proteolysis; P:defense response; F:aspartic-type endopeptidase activity; C:extracellular region; C:Golgi apparatus; C:plasma membrane; C:apoplast			IPR032861 (PFAM); IPR032799 (PFAM)	no GO terms	no GO terms
TRUE	INTERPRO, NO-BLAST	g24246.t1	---NA---	386									IPR001087 (PFAM)	F:GO:0016788	F:hydrolase activity, acting on ester bonds
TRUE	INTERPRO, NO-BLAST	g7742.t2	---NA---	363									IPR019634 (PFAM); IPR007877 (PFAM)	no GO terms	no GO terms
TRUE	INTERPRO, NO-BLAST	g15202.t1	---NA---	104									no IPS match	no IPS match	no IPS match
TRUE	INTERPRO, BLASTED, MAPPED, ANNOTATED	g12630.t1	heat shock protein 70	666	10	0	81.14	8	P:GO:0006457; P:GO:0006616; F:GO:0005524; F:GO:0140662; C:GO:0005634; C:GO:0005788; C:GO:0005829; C:GO:0005886	P:protein folding; P:SRP-dependent cotranslational protein targeting to membrane, translocation; F:ATP binding; F:ATP-dependent protein folding chaperone; C:nucleus; C:endoplasmic reticulum lumen; C:cytosol; C:plasma membrane			IPR013126 (PFAM)	no GO terms	no GO terms
TRUE	INTERPRO, NO-BLAST	g22197.t1	---NA---	271									IPR018702 (PFAM); IPR007285 (PFAM); IPR018499 (PFAM)	C:GO:0016020	C:membrane
TRUE	INTERPRO, NO-BLAST	g25460.t1	---NA---	246									IPR021684 (PFAM); IPR000074 (PFAM); IPR004238 (PFAM); IPR010279 (PFAM); IPR021793 (PFAM); IPR024623 (PFAM)	P:GO:0006869; P:GO:0042157; F:GO:0008289; C:GO:0005576	P:lipid transport; P:lipoprotein metabolic process; F:lipid binding; C:extracellular region
TRUE	INTERPRO, NO-BLAST	g36279.t1	---NA---	325									IPR013658 (PFAM); IPR001258 (PFAM); IPR018119 (PFAM); IPR008557 (PFAM)	P:GO:0009058; F:GO:0005515; F:GO:0016844	P:biosynthetic process; F:protein binding; F:strictosidine synthase activity
TRUE	INTERPRO, NO-BLAST	g6876.t1	---NA---	1269									IPR000048 (PFAM); IPR010567 (PFAM); IPR003103 (PFAM)	F:GO:0005515; F:GO:0051087	F:protein binding; F:protein-folding chaperone binding
TRUE	INTERPRO, NO-BLAST	g33844.t1	---NA---	457									IPR008166 (PFAM); PF13704 (PFAM)	no GO terms	no GO terms
TRUE	INTERPRO, NO-BLAST	g24157.t1	---NA---	628									IPR004873 (PFAM)	no GO terms	no GO terms
TRUE	INTERPRO, NO-BLAST	g11694.t1	---NA---	218									IPR021134 (PFAM); PF13850 (PFAM); IPR025325 (PFAM)	no GO terms	no GO terms
[truncated: 47,706 more rows]

## Sheet: MTvs.Mock up. FC2
Table S5. Gene Ontology (GO) functional annotation of Nicotiana benthamiana transcriptomes based on InterProScan
[truncated: 47,979 more rows]

## Sheet: MTvs.Mock down. FC2
Table S5. Gene Ontology (GO) functional annotation of Nicotiana benthamiana transcriptomes based on InterProScan
[truncated: 47,979 more rows]

[truncated: 2 more sheets: MTvs.JS up. FC1, MTvs.JS down. FC1]
