# Supplementary material
Source: Research Square preprint supplement (doi:10.21203/rs.3.rs-9029043/v1)
Supplement: Supplementary file 2 [file 4679df3ddd4dffc80df02aff.xlsx]

## Sheet: JS_vs._Mock
Table S3. DESeq2 differentially expression results for Nicotiana benthamiana transcriptomes
	baseMean	log2FoldChange	lfcSE	stat	pvalue	padj	gene
g42405.t1	1597.73	3.14405	0.101832	30.8748	2.61e-209	7.92e-205	g42405.t1
g34062.t1	6069.63	-1.93907	0.0658761	-29.4351	1.95e-190	2.97e-186	g34062.t1
g18681.t1	10271.5	-2.04054	0.0699167	-29.1853	2.98e-187	3.02e-183	g18681.t1
g32275.t1	4284.33	2.65739	0.0926392	28.6853	5.81e-181	4.42e-177	g32275.t1
g25021.t1	2420.4	3.54589	0.129943	27.288	5.89e-164	3.58e-160	g25021.t1
g6884.t1	2663.84	-2.67874	0.099574	-26.902	2.08e-159	1.05e-155	g6884.t1
g23184.t1	3639.53	-2.13946	0.0800676	-26.7206	2.71e-157	1.18e-153	g23184.t1
g458.t1	7659.07	2.56504	0.0974973	26.3088	1.52e-152	5.78e-149	g458.t1
g36275.t1	1174.21	2.65049	0.100781	26.2995	1.94e-152	6.56e-149	g36275.t1
g23644.t1	3917.39	2.16145	0.0840335	25.7213	6.75e-146	2.05e-142	g23644.t1
g43921.t1	13469.5	1.55164	0.0610039	25.4352	1.03e-142	2.85e-139	g43921.t1
g22515.t1	8641.38	2.14782	0.0850789	25.245	1.29e-140	3.25e-137	g22515.t1
g23480.t1	5005.45	1.7997	0.0721224	24.9534	1.96e-137	4.59e-134	g23480.t1
g23594.t1	6987.37	3.33896	0.133939	24.929	3.61e-137	7.84e-134	g23594.t1
g32173.t1	3633.78	-1.83949	0.0738203	-24.9185	4.69e-137	9.51e-134	g32173.t1
g21518.t1	1869.76	-3.01746	0.122545	-24.6233	7.11e-134	1.35e-130	g21518.t1
g40092.t1	2166.49	-2.06796	0.0876823	-23.5847	5.54e-123	9.9e-120	g40092.t1
g5285.t1	37496.5	-2.50595	0.107555	-23.2992	4.52e-120	7.63e-117	g5285.t1
g44497.t1	14192.4	-1.89187	0.0821394	-23.0324	2.21e-117	3.53e-114	g44497.t1
g25128.t1	2093.95	2.03776	0.0885769	23.0055	4.1e-117	6.23e-114	g25128.t1
g29712.t2	7827.22	2.21981	0.0974585	22.777	7.75e-115	1.12e-111	g29712.t2
g15205.t1	5575.9	-1.50029	0.0658866	-22.7708	8.93e-115	1.23e-111	g15205.t1
g23578.t1	484.782	4.36565	0.192061	22.7306	2.23e-114	2.95e-111	g23578.t1
g38359.t1	1953.83	2.15013	0.0947045	22.7036	4.13e-114	5.23e-111	g38359.t1
g26835.t1	8640.01	1.70587	0.0753499	22.6393	1.78e-113	2.16e-110	g26835.t1
g38357.t1	1984.77	2.16274	0.0972005	22.2503	1.12e-109	1.31e-106	g38357.t1
g7386.t1	3290.39	-2.29485	0.106691	-21.5093	1.28e-102	1.44e-99	g7386.t1
g2833.t1	1799.37	-2.22244	0.103702	-21.431	6.87e-102	7.45e-99	g2833.t1
g33369.t1	16018.2	1.88465	0.0880408	21.4066	1.16e-101	1.22e-98	g33369.t1
g2503.t1	1414.19	2.02718	0.094847	21.3731	2.38e-101	2.41e-98	g2503.t1
g32087.t1	4272.78	-1.93736	0.0922411	-21.0032	6.13e-98	6e-95	g32087.t1
g28514.t1	1951.8	-1.85464	0.0885896	-20.9352	2.56e-97	2.43e-94	g28514.t1
g1637.t1	502.845	3.42892	0.163958	20.9134	4.04e-97	3.72e-94	g1637.t1
g42520.t1	5108.53	-1.4535	0.0697641	-20.8345	2.11e-96	1.88e-93	g42520.t1
g4095.t1	6475.02	-2.01452	0.0967639	-20.8189	2.92e-96	2.53e-93	g4095.t1
g41306.t1	7906.08	3.04684	0.147348	20.6779	5.48e-95	4.63e-92	g41306.t1
g29711.t1	4971.5	2.21199	0.107436	20.5889	3.45e-94	2.84e-91	g29711.t1
g15747.t1	3392.67	2.00658	0.0975791	20.5636	5.82e-94	4.65e-91	g15747.t1
g29747.t1	3737.02	-2.56568	0.124891	-20.5433	8.83e-94	6.88e-91	g29747.t1
g9517.t1	3028.08	-2.23844	0.109164	-20.5053	1.93e-93	1.47e-90	g9517.t1
g24071.t1	1623.3	-1.74523	0.0852448	-20.4732	3.73e-93	2.77e-90	g24071.t1
g26885.t2	3302.34	3.32222	0.162934	20.39	2.05e-92	1.49e-89	g26885.t2
g29050.t1	4196.98	2.30791	0.113222	20.384	2.32e-92	1.64e-89	g29050.t1
g27140.t2	4628.77	-1.90552	0.0939384	-20.2848	1.75e-91	1.18e-88	g27140.t2
g36830.t1	651.681	4.24526	0.209273	20.2857	1.72e-91	1.18e-88	g36830.t1
g19689.t1	13784.9	-2.48878	0.123676	-20.1233	4.61e-90	3.05e-87	g19689.t1
g44210.t1	4970.45	1.30509	0.0652718	19.9947	6.13e-89	3.96e-86	g44210.t1
g29950.t1	719.257	2.38362	0.119334	19.9743	9.22e-89	5.84e-86	g29950.t1
g31958.t1	2067.27	-1.74181	0.087749	-19.8499	1.1e-87	6.84e-85	g31958.t1
g40132.t1	2531.61	-2.70826	0.136476	-19.8442	1.24e-87	7.52e-85	g40132.t1
g19513.t1	17122.8	-1.27968	0.0645543	-19.8233	1.87e-87	1.12e-84	g19513.t1
g30631.t1	4837.4	-1.65324	0.0837365	-19.7434	9.15e-87	5.35e-84	g30631.t1
g13539.t1	4826.09	2.12486	0.107889	19.6949	2.38e-86	1.37e-83	g13539.t1
g184.t1	2133.84	-2.15697	0.109686	-19.6649	4.31e-86	2.42e-83	g184.t1
g7190.t1	839.717	3.05326	0.155443	19.6423	6.72e-86	3.72e-83	g7190.t1
g14750.t1	3993.38	-1.24015	0.0633961	-19.5619	3.27e-85	1.77e-82	g14750.t1
g14793.t1	5551.2	1.97248	0.101092	19.5117	8.73e-85	4.65e-82	g14793.t1
g40618.t1	1838.75	-2.31897	0.119537	-19.3995	7.79e-84	4.08e-81	g40618.t1
g33763.t1	3949	-3.18164	0.165371	-19.2394	1.73e-82	8.91e-80	g33763.t1
g2717.t1	1090.06	-2.29546	0.120147	-19.1055	2.27e-81	1.15e-78	g2717.t1
g40525.t2	2115.6	1.95034	0.102797	18.9728	2.86e-80	1.43e-77	g40525.t2
g34118.t1	7188	1.3414	0.0711684	18.8482	3.04e-79	1.49e-76	g34118.t1
g41023.t1	689.888	2.6291	0.140106	18.765	1.46e-78	7.04e-76	g41023.t1
g10149.t1	3863.66	1.23271	0.0659979	18.678	7.48e-78	3.55e-75	g10149.t1
g38990.t1	5035.95	-1.88963	0.101499	-18.6172	2.33e-77	1.09e-74	g38990.t1
g23979.t1	1792.48	-2.32036	0.124904	-18.5772	4.91e-77	2.26e-74	g23979.t1
g29432.t1	481.43	2.63528	0.142196	18.5327	1.12e-76	5.1e-74	g29432.t1
g34320.t1	6476.72	-1.58289	0.085478	-18.5181	1.47e-76	6.59e-74	g34320.t1
g24492.t1	5558.53	1.44931	0.0782883	18.5125	1.64e-76	7.21e-74	g24492.t1
g10577.t1	12149.2	-2.03378	0.109988	-18.4909	2.45e-76	1.06e-73	g10577.t1
g36447.t1	859.817	2.7121	0.146904	18.4617	4.2e-76	1.8e-73	g36447.t1
g34059.t1	10061	-1.92164	0.104289	-18.4262	8.1e-76	3.42e-73	g34059.t1
g33831.t1	2304.57	-1.68008	0.0912819	-18.4054	1.19e-75	4.95e-73	g33831.t1
g29067.t1	2404.87	-1.48762	0.081258	-18.3074	7.22e-75	2.97e-72	g29067.t1
g46036.t1	1085.69	-2.43727	0.13344	-18.265	1.57e-74	6.37e-72	g46036.t1
g1014.t1	1561.76	-2.34568	0.128583	-18.2425	2.37e-74	9.49e-72	g1014.t1
g27958.t1	6201.98	-2.01621	0.110577	-18.2335	2.8e-74	1.1e-71	g27958.t1
g46090.t1	1086.34	-2.43549	0.134044	-18.1693	9.03e-74	3.52e-71	g46090.t1
g3944.t1	3413.04	-1.8838	0.104125	-18.0918	3.7e-73	1.42e-70	g3944.t1
g27393.t1	1712.5	-2.2841	0.12626	-18.0905	3.79e-73	1.44e-70	g27393.t1
g45285.t1	5200.85	-1.47216	0.0817602	-18.0059	1.75e-72	6.57e-70	g45285.t1
g28821.t1	13698.6	1.28863	0.0717867	17.9508	4.73e-72	1.75e-69	g28821.t1
g43458.t1	2726.44	-1.66854	0.0933046	-17.8827	1.61e-71	5.89e-69	g43458.t1
g14742.t1	6966.79	-1.96132	0.109801	-17.8625	2.31e-71	8.36e-69	g14742.t1
g19970.t1	1272.28	-2.09919	0.118084	-17.777	1.06e-70	3.81e-68	g19970.t1
g23643.t1	574.904	2.6001	0.146365	17.7645	1.33e-70	4.7e-68	g23643.t1
g33334.t1	1254.03	-1.93347	0.109142	-17.7152	3.2e-70	1.12e-67	g33334.t1
g29954.t1	3480.82	-1.78706	0.100937	-17.7046	3.86e-70	1.33e-67	g29954.t1
g43668.t1	935.273	2.18456	0.123726	17.6564	9.08e-70	3.1e-67	g43668.t1
g6253.t1	6046.53	1.39339	0.0792335	17.5859	3.16e-69	1.07e-66	g6253.t1
g22439.t1	2543.5	-1.86572	0.106493	-17.5196	1.02e-68	3.39e-66	g22439.t1
g19082.t1	4730.74	-2.13623	0.122049	-17.5031	1.36e-68	4.48e-66	g19082.t1
g38590.t1	5892.78	-1.79356	0.102483	-17.5011	1.41e-68	4.6e-66	g38590.t1
g11209.t1	710.134	2.23506	0.128227	17.4305	4.84e-68	1.57e-65	g11209.t1
g5243.t1	6037.12	-1.55488	0.0892965	-17.4125	6.63e-68	2.12e-65	g5243.t1
g978.t1	820.645	-2.51676	0.144693	-17.3937	9.2e-68	2.91e-65	g978.t1
g26316.t1	647.676	2.48014	0.143706	17.2585	9.66e-67	3.03e-64	g26316.t1
g45420.t1	2962.74	1.67482	0.0974947	17.1785	3.85e-66	1.19e-63	g45420.t1
g42187.t1	1162.67	2.17098	0.126509	17.1606	5.24e-66	1.61e-63	g42187.t1
g22653.t1	1382.86	1.4871	0.0867523	17.142	7.22e-66	2.19e-63	g22653.t1
g11786.t1	2184.12	-1.47278	0.0859806	-17.1292	8.98e-66	2.7e-63	g11786.t1
g32127.t1	3120.43	1.39975	0.0817237	17.1278	9.2e-66	2.74e-63	g32127.t1
g34566.t1	1993.34	1.52407	0.0891373	17.098	1.54e-65	4.53e-63	g34566.t1
g29874.t2	1817.85	2.80494	0.164216	17.0808	2.06e-65	6.03e-63	g29874.t2
g27441.t1	29091.9	1.74494	0.102194	17.0749	2.28e-65	6.6e-63	g27441.t1
g10624.t1	4533.77	-1.62407	0.0951998	-17.0596	2.97e-65	8.51e-63	g10624.t1
g20623.t1	5140.52	-2.19652	0.129109	-17.0129	6.59e-65	1.87e-62	g20623.t1
g41061.t1	1523.53	1.64406	0.0968438	16.9764	1.23e-64	3.45e-62	g41061.t1
g36934.t1	1677.83	-2.24537	0.132291	-16.9729	1.3e-64	3.64e-62	g36934.t1
g28503.t2	621.166	-2.0361	0.12093	-16.8371	1.31e-63	3.61e-61	g28503.t2
g3298.t1	10091.9	-1.36114	0.0809649	-16.8114	2.01e-63	5.51e-61	g3298.t1
g45947.t1	1946.84	1.81025	0.108038	16.7557	5.14e-63	1.4e-60	g45947.t1
g8178.t1	1653.38	-1.41218	0.0844403	-16.724	8.76e-63	2.34e-60	g8178.t1
g27394.t1	3107.15	-2.34826	0.140564	-16.7059	1.19e-62	3.13e-60	g27394.t1
g37770.t1	8747.33	-3.46238	0.207548	-16.6823	1.76e-62	4.62e-60	g37770.t1
g44680.t1	4099.17	-2.25642	0.135395	-16.6654	2.34e-62	6.07e-60	g44680.t1
g42383.t1	1236.08	-2.02135	0.121484	-16.6389	3.64e-62	9.38e-60	g42383.t1
g10712.t1	1569.7	-2.72465	0.164016	-16.6121	5.7e-62	1.46e-59	g10712.t1
g22793.t1	3566.54	-2.94242	0.177256	-16.5999	6.98e-62	1.77e-59	g22793.t1
g29607.t1	7591.49	-1.1984	0.0722687	-16.5826	9.31e-62	2.34e-59	g29607.t1
g16589.t1	666.937	2.7325	0.164815	16.5792	9.85e-62	2.45e-59	g16589.t1
g5456.t1	717.993	2.29746	0.138585	16.578	1.01e-61	2.48e-59	g5456.t1
g21871.t1	3026.6	-1.28828	0.0777172	-16.5764	1.03e-61	2.53e-59	g21871.t1
g8494.t1	2008.78	-1.6056	0.0974966	-16.4682	6.21e-61	1.51e-58	g8494.t1
g43660.t1	3665.11	-2.07555	0.126262	-16.4385	1.01e-60	2.45e-58	g43660.t1
g36305.t1	13288.1	-1.86964	0.113743	-16.4375	1.03e-60	2.47e-58	g36305.t1
g39268.t1	1823.37	-1.34369	0.0818649	-16.4135	1.53e-60	3.63e-58	g39268.t1
g12617.t1	257.211	-3.26183	0.19953	-16.3476	4.52e-60	1.07e-57	g12617.t1
g11405.t1	340.439	-4.71671	0.29101	-16.208	4.42e-59	1.03e-56	g11405.t1
g18426.t1	6184.11	-1.61211	0.0997819	-16.1564	1.02e-58	2.36e-56	g18426.t1
g5459.t1	4357.27	2.64892	0.164321	16.1204	1.83e-58	4.19e-56	g5459.t1
g10258.t1	605.283	2.16499	0.134408	16.1075	2.26e-58	5.12e-56	g10258.t1
g24753.t1	916.357	2.13308	0.132683	16.0764	3.73e-58	8.4e-56	g24753.t1
g13096.t1	2865.56	-1.58973	0.0994738	-15.9814	1.72e-57	3.82e-55	g13096.t1
g6135.t1	3435.14	-1.82349	0.114107	-15.9805	1.75e-57	3.85e-55	g6135.t1
g2486.t1	7072.75	-1.89831	0.118954	-15.9584	2.49e-57	5.44e-55	g2486.t1
g4950.t1	2212.85	-1.42052	0.0890839	-15.9459	3.04e-57	6.6e-55	g4950.t1
g15946.t1	2517.96	-2.14035	0.13425	-15.943	3.19e-57	6.87e-55	g15946.t1
g30166.t1	966.211	-2.10622	0.132139	-15.9394	3.38e-57	7.22e-55	g30166.t1
g19973.t1	3397.33	1.42188	0.0894302	15.8994	6.4e-57	1.36e-54	g19973.t1
g6585.t1	3625.44	-1.76074	0.11077	-15.8955	6.81e-57	1.44e-54	g6585.t1
g11772.t1	25392.3	1.38118	0.0869451	15.8856	7.97e-57	1.67e-54	g11772.t1
g27033.t1	390.407	-2.36791	0.149128	-15.8784	8.95e-57	1.86e-54	g27033.t1
g7314.t1	2669.77	-2.28275	0.143792	-15.8754	9.38e-57	1.94e-54	g7314.t1
g8311.t1	15132	1.65448	0.10428	15.8658	1.09e-56	2.25e-54	g8311.t1
g29875.t2	2457.44	-1.53627	0.0969724	-15.8423	1.59e-56	3.24e-54	g29875.t2
g28105.t1	1810.51	-1.99242	0.125863	-15.83	1.93e-56	3.91e-54	g28105.t1
g2671.t1	646.346	-1.75406	0.111203	-15.7736	4.73e-56	9.51e-54	g2671.t1
g7977.t1	465.17	2.4982	0.158403	15.7712	4.91e-56	9.82e-54	g7977.t1
g38854.t1	4743.05	-1.61817	0.102818	-15.7382	8.28e-56	1.64e-53	g38854.t1
g40643.t1	3386.76	-1.64248	0.10446	-15.7235	1.04e-55	2.06e-53	g40643.t1
g8510.t1	495.235	-1.94459	0.123736	-15.7157	1.18e-55	2.32e-53	g8510.t1
g18189.t1	17898.1	-1.57603	0.10047	-15.6866	1.87e-55	3.64e-53	g18189.t1
g39031.t2	1381.12	2.65221	0.169153	15.6794	2.09e-55	4.05e-53	g39031.t2
g2856.t1	42740.4	2.41845	0.154615	15.6417	3.79e-55	7.28e-53	g2856.t1
g6905.t1	8673.24	-1.74185	0.112531	-15.4788	4.82e-54	9.22e-52	g6905.t1
g33618.t1	2837.12	1.84602	0.119479	15.4506	7.48e-54	1.42e-51	g33618.t1
g21463.t1	2647.33	-1.93202	0.12547	-15.3982	1.68e-53	3.17e-51	g21463.t1
g15204.t1	8112.67	-1.91747	0.12497	-15.3435	3.92e-53	7.34e-51	g15204.t1
g4219.t1	1184.57	-2.32357	0.151611	-15.3259	5.13e-53	9.57e-51	g4219.t1
g42549.t1	856.536	-1.68172	0.110984	-15.1528	7.26e-52	1.35e-49	g42549.t1
g17430.t1	320.075	3.7544	0.248691	15.0966	1.7e-51	3.14e-49	g17430.t1
g23033.t1	22863.9	-1.79465	0.119056	-15.074	2.4e-51	4.4e-49	g23033.t1
g1425.t1	2549.52	-1.99908	0.132985	-15.0323	4.51e-51	8.21e-49	g1425.t1
g19717.t1	3532.07	-2.0498	0.136441	-15.0233	5.17e-51	9.29e-49	g19717.t1
g45050.t1	2752.73	-2.11429	0.140854	-15.0105	6.27e-51	1.12e-48	g45050.t1
g31065.t1	992.416	-1.45442	0.0969803	-14.9971	7.68e-51	1.36e-48	g31065.t1
g31803.t1	3899.73	-1.14501	0.0765799	-14.9519	1.51e-50	2.68e-48	g31803.t1
g43917.t1	2726.68	1.48904	0.0996117	14.9484	1.59e-50	2.8e-48	g43917.t1
g12928.t1	1285.27	-2.34322	0.157152	-14.9106	2.81e-50	4.91e-48	g12928.t1
g11240.t1	3562.89	-2.00146	0.134837	-14.8435	7.67e-50	1.32e-47	g11240.t1
g21718.t1	1585.43	2.03315	0.136991	14.8415	7.9e-50	1.36e-47	g21718.t1
g21305.t1	2464.03	-1.08088	0.0728525	-14.8366	8.5e-50	1.45e-47	g21305.t1
g43686.t1	745.567	1.65187	0.111589	14.8032	1.4e-49	2.37e-47	g43686.t1
g10193.t1	2990.36	-1.38746	0.0937748	-14.7956	1.56e-49	2.64e-47	g10193.t1
g26744.t1	566.682	-2.9149	0.19702	-14.7949	1.58e-49	2.65e-47	g26744.t1
g24815.t1	1550.73	-1.23246	0.0837636	-14.7135	5.28e-49	8.77e-47	g24815.t1
g6333.t1	5051.98	-1.79824	0.122286	-14.7052	5.97e-49	9.86e-47	g6333.t1
g9257.t1	630.823	1.73945	0.118401	14.6912	7.34e-49	1.21e-46	g9257.t1
g24039.t1	3317	-1.45342	0.0989436	-14.6894	7.54e-49	1.23e-46	g24039.t1
g529.t1	2208.64	-2.38881	0.162845	-14.6692	1.01e-48	1.65e-46	g529.t1
g27442.t1	2484.22	2.40358	0.163884	14.6664	1.06e-48	1.71e-46	g27442.t1
g7341.t1	1555.4	2.66509	0.18198	14.645	1.45e-48	2.33e-46	g7341.t1
g37847.t1	1303.64	-2.40984	0.164862	-14.6173	2.18e-48	3.47e-46	g37847.t1
g26265.t1	1421.44	-1.81346	0.124141	-14.6081	2.49e-48	3.95e-46	g26265.t1
g20056.t1	1978.13	-1.7793	0.121989	-14.5858	3.46e-48	5.45e-46	g20056.t1
g2062.t1	3136.57	-1.96545	0.134811	-14.5793	3.8e-48	5.96e-46	g2062.t1
g24111.t1	265.511	3.0304	0.20799	14.5699	4.36e-48	6.8e-46	g24111.t1
g17912.t1	792.432	-1.51424	0.104258	-14.5239	8.55e-48	1.33e-45	g17912.t1
g7062.t1	3671.55	-2.06845	0.142585	-14.5068	1.1e-47	1.69e-45	g7062.t1
g37612.t1	556.649	2.63575	0.181757	14.5015	1.19e-47	1.82e-45	g37612.t1
g38644.t1	977.497	2.91815	0.201442	14.4864	1.48e-47	2.26e-45	g38644.t1
g23634.t1	23889.2	2.18509	0.15085	14.4852	1.5e-47	2.28e-45	g23634.t1
g40525.t1	1567.41	2.04122	0.141076	14.469	1.9e-47	2.88e-45	g40525.t1
g32724.t1	1551.25	-1.63948	0.113532	-14.4406	2.87e-47	4.32e-45	g32724.t1
g25746.t1	2218.03	1.41004	0.0977684	14.4223	3.75e-47	5.61e-45	g25746.t1
g41718.t1	1041.79	1.48997	0.103483	14.3981	5.32e-47	7.92e-45	g41718.t1
g41042.t1	2092.56	1.68577	0.117431	14.3554	9.85e-47	1.46e-44	g41042.t1
g3050.t1	4834.74	-2.26489	0.157871	-14.3465	1.12e-46	1.65e-44	g3050.t1
g40301.t1	667.338	1.85906	0.129598	14.3449	1.15e-46	1.68e-44	g40301.t1
g17799.t1	1684.11	-2.2148	0.154558	-14.3299	1.42e-46	2.08e-44	g17799.t1
g28140.t1	1067.83	1.85615	0.129745	14.3062	2e-46	2.91e-44	g28140.t1
g6508.t1	6661.55	-1.51514	0.106287	-14.2552	4.16e-46	6.02e-44	g6508.t1
g37565.t1	2558.68	-1.32983	0.0934969	-14.2232	6.58e-46	9.47e-44	g37565.t1
g30738.t1	8160.32	-1.13356	0.0797507	-14.2138	7.52e-46	1.08e-43	g30738.t1
g3312.t1	3202.99	1.05791	0.0745437	14.1919	1.03e-45	1.47e-43	g3312.t1
g16424.t1	643.233	1.76415	0.124347	14.1873	1.1e-45	1.56e-43	g16424.t1
g32195.t1	7815.31	-1.37849	0.0974342	-14.1479	1.92e-45	2.72e-43	g32195.t1
g36972.t1	3164.05	-1.67919	0.118906	-14.1219	2.78e-45	3.91e-43	g36972.t1
g20706.t1	3057.29	-1.82261	0.129321	-14.0937	4.15e-45	5.81e-43	g20706.t1
g13165.t1	983.974	1.66005	0.118072	14.0597	6.72e-45	9.36e-43	g13165.t1
g15394.t1	915.532	-1.6911	0.120339	-14.0528	7.41e-45	1.03e-42	g15394.t1
g25424.t1	4085.1	-1.44044	0.102601	-14.0393	8.96e-45	1.24e-42	g25424.t1
g16518.t1	1278.74	-2.44564	0.174343	-14.0277	1.05e-44	1.45e-42	g16518.t1
g41206.t1	2107.86	-1.90702	0.135968	-14.0255	1.09e-44	1.49e-42	g41206.t1
g41005.t1	503.666	-1.83629	0.130996	-14.0179	1.21e-44	1.65e-42	g41005.t1
g35492.t1	1496.69	-2.20093	0.157142	-14.006	1.43e-44	1.94e-42	g35492.t1
g6980.t1	2405.85	-2.65877	0.190946	-13.9242	4.52e-44	6.1e-42	g6980.t1
g34068.t1	2800.4	-1.26404	0.0909171	-13.9032	6.06e-44	8.14e-42	g34068.t1
g36625.t1	1768.72	-2.05497	0.147827	-13.9012	6.23e-44	8.34e-42	g36625.t1
g30760.t1	584.303	-1.78519	0.128516	-13.8908	7.21e-44	9.61e-42	g30760.t1
g3139.t1	322.776	-2.60903	0.188027	-13.8758	8.88e-44	1.18e-41	g3139.t1
g35863.t1	8215.6	-1.64319	0.118537	-13.8623	1.07e-43	1.42e-41	g35863.t1
g26568.t1	2770.53	-1.69768	0.122479	-13.861	1.09e-43	1.44e-41	g26568.t1
g34368.t1	613.078	1.84779	0.133505	13.8406	1.45e-43	1.9e-41	g34368.t1
g3101.t1	2548.05	-1.76571	0.127695	-13.8275	1.74e-43	2.27e-41	g3101.t1
g2923.t1	977.554	-1.70333	0.123341	-13.8099	2.22e-43	2.88e-41	g2923.t1
g21462.t1	882.958	-1.38951	0.100841	-13.7792	3.4e-43	4.4e-41	g21462.t1
g41285.t1	3563.09	-1.04989	0.0762415	-13.7706	3.83e-43	4.93e-41	g41285.t1
g37892.t1	4480.76	-1.22518	0.0890276	-13.7618	4.33e-43	5.55e-41	g37892.t1
g8250.t1	1394.85	2.30506	0.16754	13.7583	4.54e-43	5.8e-41	g8250.t1
g8169.t1	3613.33	-1.00389	0.0732146	-13.7117	8.64e-43	1.1e-40	g8169.t1
g20112.t1	715.644	-1.77008	0.129177	-13.7028	9.77e-43	1.24e-40	g20112.t1
g31631.t1	1997.63	1.21209	0.0885679	13.6854	1.24e-42	1.56e-40	g31631.t1
g12677.t1	1520.69	-1.59356	0.116669	-13.6587	1.79e-42	2.25e-40	g12677.t1
g23445.t1	4218.09	-1.42839	0.104804	-13.6292	2.68e-42	3.36e-40	g23445.t1
g2371.t1	3410.88	-1.14571	0.0840658	-13.6287	2.7e-42	3.37e-40	g2371.t1
g18667.t1	435.717	-2.0869	0.153198	-13.6222	2.95e-42	3.66e-40	g18667.t1
g21307.t1	1810.54	-1.42282	0.104698	-13.5898	4.6e-42	5.68e-40	g21307.t1
g36271.t1	1155.07	-1.1544	0.0849875	-13.5832	5.04e-42	6.2e-40	g36271.t1
g42395.t1	1440.9	-2.34353	0.172569	-13.5802	5.25e-42	6.43e-40	g42395.t1
g15212.t1	2252.42	-1.91339	0.140904	-13.5794	5.31e-42	6.45e-40	g15212.t1
g26646.t1	11536.8	-1.88623	0.138903	-13.5795	5.3e-42	6.45e-40	g26646.t1
g20504.t1	3133.82	1.78659	0.132066	13.5279	1.07e-41	1.3e-39	g20504.t1
g2831.t1	488.814	1.84347	0.13636	13.5191	1.21e-41	1.45e-39	g2831.t1
g33908.t1	773.923	1.649	0.122184	13.496	1.65e-41	1.98e-39	g33908.t1
g38489.t1	15407.3	1.93287	0.143524	13.4672	2.44e-41	2.92e-39	g38489.t1
g26720.t1	2935.98	-1.75635	0.130538	-13.4547	2.89e-41	3.44e-39	g26720.t1
g18672.t1	24931	1.96044	0.146164	13.4126	5.1e-41	6.03e-39	g18672.t1
g1871.t1	1664.65	-1.30328	0.0972385	-13.4029	5.82e-41	6.85e-39	g1871.t1
g13522.t2	846.608	-3.70217	0.276351	-13.3966	6.33e-41	7.42e-39	g13522.t2
g25630.t1	10086.3	-2.4567	0.183619	-13.3794	7.98e-41	9.33e-39	g25630.t1
g18545.t1	743.126	-2.81141	0.21026	-13.3711	8.92e-41	1.04e-38	g18545.t1
g5750.t1	334.326	2.13962	0.160139	13.361	1.02e-40	1.19e-38	g5750.t1
g45341.t1	4895.72	-1.08915	0.0815875	-13.3494	1.19e-40	1.38e-38	g45341.t1
g21957.t1	5057.79	-1.66372	0.124676	-13.3444	1.28e-40	1.47e-38	g21957.t1
g17029.t1	1166.26	-2.34697	0.175911	-13.3418	1.32e-40	1.52e-38	g17029.t1
g40683.t1	414.908	-3.16012	0.237001	-13.3338	1.47e-40	1.68e-38	g40683.t1
g6787.t1	2242.72	-2.30355	0.173167	-13.3025	2.24e-40	2.55e-38	g6787.t1
g30211.t1	1283.73	-1.09077	0.0820559	-13.293	2.54e-40	2.88e-38	g30211.t1
g9632.t1	1265.79	1.72203	0.129571	13.2903	2.64e-40	2.98e-38	g9632.t1
g23083.t1	833.62	-1.40123	0.10555	-13.2755	3.21e-40	3.61e-38	g23083.t1
g25634.t1	2629.64	-1.30199	0.0981049	-13.2714	3.39e-40	3.8e-38	g25634.t1
g8892.t1	1400.66	-1.6596	0.125157	-13.2602	3.94e-40	4.4e-38	g8892.t1
g12815.t1	5048.07	-1.52313	0.11503	-13.2411	5.08e-40	5.61e-38	g12815.t1
g11126.t1	518.512	1.85457	0.140203	13.2278	6.07e-40	6.68e-38	g11126.t1
g22326.t1	1298.26	-1.97915	0.149653	-13.2249	6.3e-40	6.91e-38	g22326.t1
g43847.t1	1527.83	-2.02015	0.152757	-13.2246	6.33e-40	6.92e-38	g43847.t1
g21702.t1	2028.1	1.54113	0.116783	13.1965	9.19e-40	1e-37	g21702.t1
g1055.t1	4213.2	-1.01462	0.0771294	-13.1547	1.6e-39	1.74e-37	g1055.t1
g20504.t2	1692.43	1.83611	0.139853	13.1288	2.25e-39	2.43e-37	g20504.t2
g1717.t1	3463.73	-2.69292	0.205134	-13.1276	2.29e-39	2.47e-37	g1717.t1
g33978.t1	256.954	2.39166	0.182227	13.1246	2.38e-39	2.55e-37	g33978.t1
g4580.t1	3512.44	1.09808	0.0837366	13.1135	2.75e-39	2.94e-37	g4580.t1
g11399.t1	1742.3	1.14051	0.0870174	13.1067	3.01e-39	3.2e-37	g11399.t1
g15846.t1	3528.61	-1.14398	0.087306	-13.1031	3.16e-39	3.35e-37	g15846.t1
g6624.t1	1081.4	-1.49479	0.114152	-13.0948	3.53e-39	3.72e-37	g6624.t1
g5617.t1	607.294	2.3217	0.177397	13.0876	3.88e-39	4.08e-37	g5617.t1
g24000.t1	1423.81	-2.04065	0.156172	-13.0667	5.1e-39	5.35e-37	g24000.t1
g2198.t1	1839.37	-1.63702	0.125315	-13.0632	5.34e-39	5.58e-37	g2198.t1
g34254.t1	2174	-1.00575	0.0770083	-13.0603	5.55e-39	5.77e-37	g34254.t1
g2632.t1	787.325	1.69332	0.129913	13.0343	7.81e-39	8.1e-37	g2632.t1
g1663.t1	1734.25	-1.20079	0.092174	-13.0275	8.54e-39	8.83e-37	g1663.t1
g1084.t1	3330.38	-1.55667	0.119521	-13.0242	8.91e-39	9.18e-37	g1084.t1
g5341.t1	383.178	2.4964	0.192579	12.963	1.98e-38	2.04e-36	g5341.t1
g30948.t1	3330.44	-1.26263	0.0974855	-12.9519	2.29e-38	2.34e-36	g30948.t1
g36568.t1	1818.57	1.3385	0.103367	12.9489	2.38e-38	2.43e-36	g36568.t1
g43279.t1	1703.69	-1.8849	0.145586	-12.947	2.44e-38	2.48e-36	g43279.t1
g23095.t1	1767.71	2.61086	0.202441	12.8969	4.69e-38	4.73e-36	g23095.t1
g34186.t1	550.738	-1.76217	0.136715	-12.8894	5.16e-38	5.18e-36	g34186.t1
g15258.t1	1828.16	-1.1455	0.0889166	-12.8829	5.62e-38	5.62e-36	g15258.t1
g45787.t1	19302.1	-1.24081	0.0963378	-12.8798	5.85e-38	5.83e-36	g45787.t1
g9643.t1	2014.35	-1.2237	0.0951567	-12.8598	7.57e-38	7.5e-36	g9643.t1
g24043.t1	864.704	1.66547	0.129524	12.8584	7.72e-38	7.61e-36	g24043.t1
g22891.t1	1466.06	-1.06608	0.0831198	-12.8258	1.18e-37	1.16e-35	g22891.t1
g20955.t1	5312.88	2.00496	0.156329	12.8252	1.18e-37	1.16e-35	g20955.t1
g24095.t1	3176.22	-1.19491	0.0932241	-12.8176	1.31e-37	1.28e-35	g24095.t1
g34061.t1	9608	-1.83748	0.143389	-12.8147	1.36e-37	1.32e-35	g34061.t1
g23727.t1	791.915	-2.17279	0.16961	-12.8105	1.43e-37	1.39e-35	g23727.t1
g44991.t1	2085.2	1.34292	0.105081	12.7798	2.12e-37	2.06e-35	g44991.t1
g8943.t1	1477.18	-1.50116	0.11748	-12.778	2.18e-37	2.1e-35	g8943.t1
g22115.t1	16649.2	-1.26872	0.0993468	-12.7706	2.39e-37	2.3e-35	g22115.t1
g31632.t1	609.19	1.74054	0.136358	12.7645	2.59e-37	2.48e-35	g31632.t1
g38172.t1	5805.92	-1.08554	0.0851067	-12.755	2.92e-37	2.79e-35	g38172.t1
g26550.t1	785.896	-1.85275	0.145434	-12.7394	3.57e-37	3.4e-35	g26550.t1
g21735.t1	2222.58	-1.02337	0.0805204	-12.7094	5.24e-37	4.98e-35	g21735.t1
g5766.t1	444.975	-2.50003	0.196887	-12.6978	6.08e-37	5.76e-35	g5766.t1
g40273.t1	1004.1	-1.29889	0.102635	-12.6554	1.04e-36	9.82e-35	g40273.t1
g17651.t1	2154.95	-1.40647	0.111424	-12.6227	1.58e-36	1.49e-34	g17651.t1
g4018.t1	2250.17	1.23713	0.0980595	12.6161	1.72e-36	1.61e-34	g4018.t1
g812.t1	2062.64	-2.55292	0.202551	-12.6038	2.01e-36	1.87e-34	g812.t1
g25005.t1	641.832	-2.11838	0.16816	-12.5974	2.18e-36	2.03e-34	g25005.t1
g5061.t1	1289.74	1.48831	0.118185	12.5931	2.31e-36	2.14e-34	g5061.t1
g17678.t1	1679.37	-1.50459	0.119648	-12.5752	2.89e-36	2.67e-34	g17678.t1
g29748.t1	1121.55	-1.82626	0.145274	-12.5712	3.04e-36	2.8e-34	g29748.t1
g9414.t1	812.96	-1.41658	0.113004	-12.5357	4.76e-36	4.37e-34	g9414.t1
g45102.t1	1169.15	1.38794	0.110741	12.5333	4.91e-36	4.49e-34	g45102.t1
g35643.t1	413.671	-2.19766	0.175898	-12.4939	8.06e-36	7.35e-34	g35643.t1
g19987.t1	11282.2	2.96859	0.237987	12.4737	1.04e-35	9.45e-34	g19987.t1
g11984.t2	354.297	2.97795	0.239076	12.456	1.3e-35	1.18e-33	g11984.t2
g28961.t1	434.672	-2.0471	0.164893	-12.4147	2.18e-35	1.97e-33	g28961.t1
g37765.t1	500.55	-1.58687	0.127976	-12.3998	2.62e-35	2.36e-33	g37765.t1
g29682.t1	1229.03	-1.72834	0.139556	-12.3845	3.17e-35	2.85e-33	g29682.t1
g10367.t1	644.648	-1.66038	0.134439	-12.3505	4.84e-35	4.34e-33	g10367.t1
g11866.t1	982.159	-1.70389	0.138093	-12.3387	5.6e-35	5.01e-33	g11866.t1
g20059.t1	3240.63	-1.15567	0.093815	-12.3187	7.19e-35	6.41e-33	g20059.t1
g31674.t1	5671.84	-1.4776	0.119989	-12.3145	7.57e-35	6.73e-33	g31674.t1
g4978.t1	3463.93	-1.72496	0.140313	-12.2937	9.79e-35	8.67e-33	g4978.t1
g39758.t1	3228.24	1.18036	0.09612	12.28	1.16e-34	1.02e-32	g39758.t1
g33201.t1	1016.11	-1.53351	0.125	-12.2681	1.34e-34	1.18e-32	g33201.t1
g2525.t1	1834.71	-1.70683	0.13915	-12.2661	1.38e-34	1.21e-32	g2525.t1
g38081.t1	2162.45	-1.54193	0.125828	-12.2543	1.59e-34	1.4e-32	g38081.t1
g42610.t1	1393.9	-2.27417	0.185686	-12.2474	1.73e-34	1.51e-32	g42610.t1
g6434.t1	4432.93	-1.84166	0.150386	-12.2462	1.76e-34	1.53e-32	g6434.t1
g30805.t1	933.628	1.39049	0.11362	12.2381	1.95e-34	1.69e-32	g30805.t1
g5395.t1	4555.36	-1.19676	0.0978391	-12.2319	2.1e-34	1.81e-32	g5395.t1
g7241.t1	752.576	-2.10582	0.172171	-12.231	2.12e-34	1.83e-32	g7241.t1
g25740.t1	520.068	2.33774	0.191175	12.2283	2.2e-34	1.88e-32	g25740.t1
g41131.t1	1327.84	-1.35069	0.110521	-12.2211	2.4e-34	2.05e-32	g41131.t1
g20206.t1	840.797	1.33081	0.108922	12.218	2.49e-34	2.13e-32	g20206.t1
g9977.t1	3833.14	1.1436	0.093666	12.2093	2.77e-34	2.36e-32	g9977.t1
g34049.t1	2486.12	-1.13655	0.0931098	-12.2065	2.87e-34	2.44e-32	g34049.t1
g23780.t1	741.784	1.39243	0.114287	12.1836	3.8e-34	3.22e-32	g23780.t1
g32637.t1	1065.97	-1.92439	0.158133	-12.1694	4.52e-34	3.81e-32	g32637.t1
g655.t1	2482.32	-2.20817	0.181513	-12.1654	4.75e-34	3.99e-32	g655.t1
g12022.t1	9763.59	1.29043	0.106141	12.1577	5.22e-34	4.37e-32	g12022.t1
g18169.t1	888.417	-1.72633	0.142206	-12.1397	6.51e-34	5.42e-32	g18169.t1
g15048.t1	1351.19	1.4193	0.116935	12.1375	6.68e-34	5.55e-32	g15048.t1
g23410.t1	1017.31	-1.58987	0.131551	-12.0856	1.26e-33	1.04e-31	g23410.t1
g10718.t1	715.251	-1.56413	0.129547	-12.0738	1.45e-33	1.2e-31	g10718.t1
g20148.t1	2324.75	1.36327	0.113143	12.0491	1.96e-33	1.61e-31	g20148.t1
g40940.t1	2364.61	-1.58004	0.131168	-12.046	2.04e-33	1.67e-31	g40940.t1
g6848.t1	2063.22	1.48497	0.123345	12.0392	2.21e-33	1.81e-31	g6848.t1
g2895.t1	883.663	-2.19287	0.182555	-12.0121	3.07e-33	2.5e-31	g2895.t1
g1190.t1	3312.47	-1.39583	0.116232	-12.009	3.19e-33	2.59e-31	g1190.t1
g20777.t1	3216.19	1.13157	0.0943386	11.9948	3.78e-33	3.07e-31	g20777.t1
g2100.t1	499.25	-2.8569	0.238339	-11.9867	4.17e-33	3.37e-31	g2100.t1
g13872.t1	1755.5	-1.30992	0.109312	-11.9833	4.35e-33	3.5e-31	g13872.t1
g40449.t1	2255.79	-1.40575	0.117323	-11.9819	4.42e-33	3.55e-31	g40449.t1
g23635.t1	26081.1	2.49471	0.208396	11.971	5.04e-33	4.04e-31	g23635.t1
g6889.t1	1970.23	-1.25419	0.104777	-11.9701	5.1e-33	4.08e-31	g6889.t1
g42208.t1	743.396	1.74664	0.145969	11.9658	5.37e-33	4.28e-31	g42208.t1
g18161.t1	1793.92	1.01577	0.0848986	11.9645	5.45e-33	4.34e-31	g18161.t1
g24143.t1	1164.52	-2.43269	0.203442	-11.9576	5.92e-33	4.7e-31	g24143.t1
g29874.t1	21837.9	2.16405	0.181005	11.9557	6.06e-33	4.8e-31	g29874.t1
g32027.t1	566.723	-1.59543	0.133473	-11.9532	6.25e-33	4.93e-31	g32027.t1
g23479.t1	4472.19	1.59644	0.133669	11.9432	7.04e-33	5.55e-31	g23479.t1
g34855.t1	4237.87	1.14135	0.0955807	11.9412	7.21e-33	5.66e-31	g34855.t1
g33750.t1	1244.95	1.21563	0.101828	11.9381	7.5e-33	5.87e-31	g33750.t1
g29615.t1	1484.47	-1.11647	0.0936249	-11.9249	8.78e-33	6.86e-31	g29615.t1
g12056.t1	1626.99	-1.78685	0.149867	-11.9229	8.99e-33	7.01e-31	g12056.t1
g43178.t1	17332.7	-1.53689	0.129153	-11.8997	1.19e-32	9.23e-31	g43178.t1
g10726.t1	1346.67	-1.57993	0.132889	-11.889	1.35e-32	1.04e-30	g10726.t1
g26236.t1	7793.74	-1.6045	0.135111	-11.8755	1.59e-32	1.22e-30	g26236.t1
g36193.t1	1383.22	1.06559	0.0897783	11.8691	1.71e-32	1.32e-30	g36193.t1
g20956.t1	811.296	1.84692	0.155854	11.8503	2.14e-32	1.64e-30	g20956.t1
g2866.t1	4025.59	1.03187	0.0870782	11.8499	2.15e-32	1.64e-30	g2866.t1
g43586.t1	1025.8	-1.22669	0.103585	-11.8424	2.35e-32	1.79e-30	g43586.t1
g12061.t1	1726.19	-1.42746	0.120658	-11.8307	2.71e-32	2.06e-30	g12061.t1
g23630.t1	32159.5	1.92881	0.163116	11.8248	2.91e-32	2.2e-30	g23630.t1
g8145.t1	3284.55	-1.16479	0.0985202	-11.8229	2.97e-32	2.25e-30	g8145.t1
g39854.t1	509.602	2.14438	0.181409	11.8207	3.05e-32	2.3e-30	g39854.t1
g23374.t1	147.328	-3.94273	0.333648	-11.817	3.19e-32	2.4e-30	g23374.t1
g16156.t1	1068.87	-1.65866	0.140636	-11.794	4.19e-32	3.15e-30	g16156.t1
g14532.t1	621.59	-1.80781	0.153316	-11.7914	4.33e-32	3.24e-30	g14532.t1
g14727.t1	2947.45	1.10101	0.0934388	11.7833	4.76e-32	3.56e-30	g14727.t1
g26768.t1	1471.61	-1.13618	0.096436	-11.7817	4.85e-32	3.61e-30	g26768.t1
g30878.t1	1000.72	-2.20868	0.187501	-11.7796	4.97e-32	3.7e-30	g30878.t1
g35986.t1	561.491	-1.47524	0.125318	-11.772	5.45e-32	4.04e-30	g35986.t1
g8579.t1	507.56	-1.52337	0.129712	-11.7443	7.56e-32	5.59e-30	g8579.t1
g1011.t1	2347.15	-1.78121	0.151681	-11.7432	7.66e-32	5.65e-30	g1011.t1
g6924.t1	13384.7	1.52254	0.129695	11.7394	8e-32	5.89e-30	g6924.t1
g31948.t1	978.818	-1.2357	0.10528	-11.7372	8.22e-32	6.03e-30	g31948.t1
g36116.t1	1395.42	-1.09522	0.093431	-11.7223	9.8e-32	7.18e-30	g36116.t1
g14500.t1	2278.54	1.33576	0.114217	11.6949	1.35e-31	9.86e-30	g14500.t1
g19712.t1	493.891	2.02485	0.17318	11.6922	1.4e-31	1.02e-29	g19712.t1
g43864.t1	1454.47	1.00792	0.0862364	11.6879	1.47e-31	1.07e-29	g43864.t1
g33433.t1	1302.8	-1.16721	0.0999972	-11.6724	1.76e-31	1.28e-29	g33433.t1
g6878.t1	1721.22	-1.15975	0.0994484	-11.6618	2e-31	1.44e-29	g6878.t1
g9183.t1	832.957	1.46558	0.125736	11.656	2.14e-31	1.54e-29	g9183.t1
g16875.t1	917.103	-1.43807	0.123439	-11.65	2.29e-31	1.65e-29	g16875.t1
g21302.t1	998.178	-1.40433	0.120558	-11.6485	2.33e-31	1.67e-29	g21302.t1
g13446.t1	327.421	-2.0412	0.175277	-11.6456	2.42e-31	1.73e-29	g13446.t1
g30137.t1	3298.98	-1.13551	0.0976239	-11.6315	2.85e-31	2.03e-29	g30137.t1
g44036.t1	886.232	-2.68724	0.231392	-11.6134	3.52e-31	2.51e-29	g44036.t1
g4652.t1	29683.9	-1.4138	0.121772	-11.6102	3.66e-31	2.6e-29	g4652.t1
g4276.t1	942.551	-2.04721	0.176347	-11.609	3.71e-31	2.63e-29	g4276.t1
g30239.t1	269.272	-2.31907	0.200595	-11.561	6.5e-31	4.59e-29	g30239.t1
g7505.t1	3040.61	-2.67426	0.231326	-11.5605	6.53e-31	4.6e-29	g7505.t1
g10274.t1	229.996	3.07952	0.266657	11.5486	7.5e-31	5.28e-29	g10274.t1
g8039.t1	758.704	2.24438	0.194502	11.5391	8.38e-31	5.88e-29	g8039.t1
g6044.t1	13472.1	1.56887	0.136081	11.5289	9.43e-31	6.59e-29	g6044.t1
g22819.t1	413.498	-2.99767	0.260206	-11.5204	1.04e-30	7.26e-29	g22819.t1
g18578.t1	184.364	-5.82983	0.506509	-11.5098	1.18e-30	8.19e-29	g18578.t1
g20027.t1	578.048	-1.64684	0.143186	-11.5014	1.3e-30	9.01e-29	g20027.t1
g8871.t1	13888.5	-1.98472	0.172615	-11.498	1.35e-30	9.35e-29	g8871.t1
g14009.t1	340.761	1.97601	0.171874	11.4968	1.37e-30	9.45e-29	g14009.t1
g15321.t1	21816.9	-1.4367	0.125096	-11.4847	1.57e-30	1.08e-28	g15321.t1
g21893.t1	1615.68	-1.29851	0.113072	-11.4839	1.59e-30	1.09e-28	g21893.t1
g10421.t1	2856.28	-1.2825	0.111877	-11.4634	2.01e-30	1.38e-28	g10421.t1
g39318.t1	1198.37	-1.31964	0.115209	-11.4543	2.24e-30	1.52e-28	g39318.t1
g25051.t1	1876.46	-2.82997	0.247367	-11.4404	2.63e-30	1.79e-28	g25051.t1
g27444.t1	8497.18	1.67509	0.146635	11.4235	3.19e-30	2.16e-28	g27444.t1
g38386.t1	627.455	-2.79568	0.24489	-11.416	3.48e-30	2.35e-28	g38386.t1
g20718.t1	3378.88	-2.65962	0.233488	-11.3908	4.65e-30	3.14e-28	g20718.t1
g26885.t1	7711.12	1.03984	0.0914787	11.367	6.1e-30	4.1e-28	g26885.t1
g17983.t1	2111.49	-1.61692	0.142628	-11.3367	8.64e-30	5.79e-28	g17983.t1
g28929.t1	1897.62	-1.68624	0.148905	-11.3243	9.95e-30	6.66e-28	g28929.t1
g23613.t1	1025.28	-1.70817	0.150964	-11.3151	1.1e-29	7.38e-28	g23613.t1
g21659.t1	1932.87	-1.04388	0.0923095	-11.3084	1.19e-29	7.94e-28	g21659.t1
g38410.t1	1370.6	-1.51534	0.134123	-11.2981	1.34e-29	8.91e-28	g38410.t1
g26643.t1	796.389	-1.5174	0.134356	-11.2939	1.41e-29	9.34e-28	g26643.t1
g6698.t1	1334.73	1.02576	0.0909019	11.2842	1.57e-29	1.04e-27	g6698.t1
g834.t1	1021.36	-1.342	0.11899	-11.2783	1.68e-29	1.11e-27	g834.t1
g3619.t1	1212.26	-2.27804	0.202291	-11.2612	2.04e-29	1.34e-27	g3619.t1
g33449.t1	683.82	2.09957	0.186735	11.2436	2.49e-29	1.63e-27	g33449.t1
g29212.t1	1225.82	1.32211	0.117604	11.2421	2.53e-29	1.66e-27	g29212.t1
g33675.t1	1053.67	-1.3282	0.118465	-11.2117	3.57e-29	2.33e-27	g33675.t1
g38109.t1	3979.72	1.88973	0.16882	11.1938	4.37e-29	2.84e-27	g38109.t1
g27906.t1	1950.26	-1.12343	0.10045	-11.184	4.88e-29	3.17e-27	g27906.t1
g36117.t1	1873.91	-1.41641	0.126723	-11.1772	5.27e-29	3.41e-27	g36117.t1
g36872.t1	121.025	3.39487	0.303825	11.1738	5.48e-29	3.54e-27	g36872.t1
g35841.t1	4771.63	-1.16909	0.104657	-11.1706	5.68e-29	3.66e-27	g35841.t1
g10660.t1	1319.56	-1.31023	0.117295	-11.1703	5.7e-29	3.66e-27	g10660.t1
g10742.t1	995.543	-1.60108	0.143414	-11.164	6.11e-29	3.92e-27	g10742.t1
g6441.t1	2158.48	-1.47516	0.132253	-11.1541	6.84e-29	4.38e-27	g6441.t1
g46107.t1	1014.19	-1.56402	0.140662	-11.119	1.01e-28	6.46e-27	g46107.t1
g26059.t1	608.152	1.5852	0.142586	11.1175	1.03e-28	6.56e-27	g26059.t1
g34185.t1	315.585	-2.53472	0.228417	-11.0969	1.3e-28	8.2e-27	g34185.t1
g36513.t1	2740.42	-2.13246	0.192167	-11.0969	1.3e-28	8.2e-27	g36513.t1
g40638.t1	747.257	1.54246	0.139203	11.0807	1.56e-28	9.8e-27	g40638.t1
g14378.t1	2996.27	-1.16685	0.105388	-11.0719	1.72e-28	1.08e-26	g14378.t1
g41958.t1	964.851	-1.38449	0.125102	-11.0669	1.82e-28	1.14e-26	g41958.t1
g30601.t1	1047.49	-1.26877	0.114685	-11.0631	1.89e-28	1.18e-26	g30601.t1
g28305.t1	2137.83	-1.31684	0.119044	-11.0617	1.92e-28	1.2e-26	g28305.t1
g23950.t1	2662.66	-2.00044	0.180969	-11.054	2.1e-28	1.31e-26	g23950.t1
g20926.t1	3954.34	-1.4748	0.133469	-11.0497	2.2e-28	1.37e-26	g20926.t1
g29133.t1	1212.11	-1.11568	0.100981	-11.0483	2.23e-28	1.38e-26	g29133.t1
g21419.t1	891.472	-1.0416	0.0942943	-11.0462	2.29e-28	1.41e-26	g21419.t1
g24974.t1	1583.76	-2.24638	0.203383	-11.0451	2.32e-28	1.43e-26	g24974.t1
g19502.t1	668.862	1.29859	0.117634	11.0392	2.47e-28	1.52e-26	g19502.t1
g45758.t1	352.208	1.86844	0.169588	11.0175	3.15e-28	1.93e-26	g45758.t1
g28113.t1	2136.98	-1.32474	0.120305	-11.0115	3.37e-28	2.06e-26	g28113.t1
g18824.t1	558.519	1.46252	0.13292	11.003	3.7e-28	2.26e-26	g18824.t1
g45190.t1	970.625	1.06077	0.0964751	10.9953	4.02e-28	2.46e-26	g45190.t1
g166.t1	825.034	-1.2683	0.115385	-10.9919	4.18e-28	2.55e-26	g166.t1
g20023.t1	1317.76	-1.9941	0.181856	-10.9653	5.61e-28	3.41e-26	g20023.t1
g44264.t1	2220.93	-1.5066	0.13742	-10.9634	5.73e-28	3.47e-26	g44264.t1
g30548.t1	3452.44	-1.68545	0.153803	-10.9585	6.05e-28	3.66e-26	g30548.t1
g11974.t1	674.133	1.85801	0.170009	10.9289	8.39e-28	5.05e-26	g11974.t1
g3099.t1	2876.96	-1.34086	0.122798	-10.9193	9.33e-28	5.6e-26	g3099.t1
g26239.t1	1147.58	-1.68633	0.15447	-10.9169	9.57e-28	5.74e-26	g26239.t1
g19273.t1	428.439	2.21363	0.203109	10.8987	1.17e-27	6.98e-26	g19273.t1
g32578.t1	14177.4	-1.52366	0.13988	-10.8926	1.25e-27	7.45e-26	g32578.t1
g24476.t1	714.208	-1.37252	0.126011	-10.892	1.26e-27	7.48e-26	g24476.t1
g46204.t1	1552.09	-1.29243	0.118661	-10.8918	1.26e-27	7.48e-26	g46204.t1
g1741.t1	2138.2	-1.58895	0.145919	-10.8893	1.3e-27	7.68e-26	g1741.t1
g35861.t1	258.493	2.72224	0.250089	10.8851	1.36e-27	8.03e-26	g35861.t1
g43345.t1	1576.22	-1.15372	0.106166	-10.8671	1.65e-27	9.76e-26	g43345.t1
g13959.t1	449.144	-1.37601	0.126896	-10.8436	2.14e-27	1.26e-25	g13959.t1
g46206.t1	1616.92	-1.29953	0.119865	-10.8416	2.19e-27	1.28e-25	g46206.t1
g41563.t1	9667.1	1.25639	0.115891	10.8412	2.2e-27	1.29e-25	g41563.t1
g6772.t1	666.542	-1.52165	0.140402	-10.8378	2.28e-27	1.33e-25	g6772.t1
g12959.t1	479.866	1.70715	0.157669	10.8274	2.55e-27	1.49e-25	g12959.t1
g37173.t1	5900.68	-1.59406	0.147252	-10.8254	2.61e-27	1.52e-25	g37173.t1
g29864.t1	8035.62	-1.98591	0.184196	-10.7815	4.21e-27	2.43e-25	g29864.t1
g1177.t1	1731.97	-1.41747	0.131519	-10.7777	4.39e-27	2.53e-25	g1177.t1
g39566.t1	1921.97	-2.52824	0.23464	-10.775	4.52e-27	2.6e-25	g39566.t1
g671.t1	1568.16	-1.2676	0.117792	-10.7613	5.24e-27	3.01e-25	g671.t1
g45989.t1	3514.57	1.22586	0.113976	10.7555	5.59e-27	3.2e-25	g45989.t1
g9410.t1	31976.6	1.58633	0.147564	10.7501	5.92e-27	3.38e-25	g9410.t1
g16317.t1	3924.98	-1.37145	0.127592	-10.7487	6.01e-27	3.43e-25	g16317.t1
g30731.t1	670.835	-1.58063	0.147099	-10.7453	6.23e-27	3.54e-25	g30731.t1
g19354.t1	5814.58	1.06836	0.0995918	10.7274	7.57e-27	4.29e-25	g19354.t1
g14589.t1	6912.61	-1.02888	0.0959149	-10.727	7.6e-27	4.3e-25	g14589.t1
g41380.t1	1264.37	-1.39095	0.129773	-10.7183	8.35e-27	4.72e-25	g41380.t1
g22422.t1	538.954	1.36867	0.127705	10.7174	8.43e-27	4.75e-25	g22422.t1
g8806.t1	838.09	1.9737	0.184215	10.7141	8.74e-27	4.92e-25	g8806.t1
g34966.t1	1155.66	-1.89878	0.177249	-10.7125	8.89e-27	5e-25	g34966.t1
g35025.t1	530.328	-2.36338	0.220632	-10.7119	8.95e-27	5.02e-25	g35025.t1
g29712.t1	3180.32	3.10385	0.289847	10.7086	9.28e-27	5.19e-25	g29712.t1
g5249.t1	1275.46	-1.58108	0.147658	-10.7077	9.37e-27	5.23e-25	g5249.t1
g39084.t1	1429.93	1.4685	0.137188	10.7043	9.72e-27	5.41e-25	g39084.t1
g974.t1	527.012	-1.30905	0.122304	-10.7032	9.83e-27	5.46e-25	g974.t1
g17682.t1	1040.06	-1.39708	0.130716	-10.6879	1.16e-26	6.43e-25	g17682.t1
g6184.t1	5193.12	-1.18643	0.111099	-10.6791	1.28e-26	7.06e-25	g6184.t1
g20195.t1	1197.2	-1.23495	0.115917	-10.6537	1.67e-26	9.24e-25	g20195.t1
g38522.t1	4779.32	1.09242	0.102548	10.6527	1.69e-26	9.32e-25	g38522.t1
g25079.t1	2004.72	-1.12185	0.105342	-10.6495	1.75e-26	9.63e-25	g25079.t1
g22978.t1	873.095	-1.46934	0.138097	-10.6399	1.94e-26	1.07e-24	g22978.t1
g6109.t1	1107.68	-1.59033	0.14956	-10.6334	2.08e-26	1.14e-24	g6109.t1
g42421.t1	1657.32	-1.41862	0.133413	-10.6333	2.09e-26	1.14e-24	g42421.t1
g2221.t1	18231.8	1.30579	0.122818	10.632	2.12e-26	1.15e-24	g2221.t1
g41808.t1	10110.2	1.30354	0.12264	10.6289	2.19e-26	1.19e-24	g41808.t1
g26929.t1	1090.75	-1.22412	0.115284	-10.6183	2.45e-26	1.33e-24	g26929.t1
g7124.t1	536.679	-1.55458	0.146414	-10.6177	2.47e-26	1.34e-24	g7124.t1
g9929.t1	4924.64	1.23589	0.116417	10.6161	2.51e-26	1.36e-24	g9929.t1
g16050.t1	604.736	-2.44518	0.230384	-10.6135	2.58e-26	1.39e-24	g16050.t1
g7443.t1	507.336	-1.83688	0.173462	-10.5895	3.33e-26	1.79e-24	g7443.t1
g8566.t1	2403.69	-1.62432	0.153396	-10.5891	3.35e-26	1.8e-24	g8566.t1
g29675.t1	463.384	-1.43869	0.136304	-10.5549	4.82e-26	2.57e-24	g29675.t1
g41458.t1	7520.61	-1.37833	0.130608	-10.5532	4.91e-26	2.61e-24	g41458.t1
g44858.t1	1474.65	-1.15867	0.109843	-10.5484	5.16e-26	2.74e-24	g44858.t1
g43858.t1	322.558	-2.36264	0.224027	-10.5462	5.29e-26	2.8e-24	g43858.t1
g38601.t1	1743.01	-1.21678	0.115381	-10.5457	5.32e-26	2.81e-24	g38601.t1
g45141.t1	2926.92	-1.47972	0.140371	-10.5415	5.56e-26	2.94e-24	g45141.t1
g15374.t1	466.875	-1.78847	0.169667	-10.541	5.59e-26	2.95e-24	g15374.t1
g11178.t1	33611	1.14697	0.108839	10.5382	5.76e-26	3.03e-24	g11178.t1
g21913.t1	9855.51	1.08242	0.102735	10.536	5.89e-26	3.1e-24	g21913.t1
g17125.t1	922.138	1.22332	0.116234	10.5246	6.65e-26	3.49e-24	g17125.t1
g23322.t1	186.953	-2.20329	0.209439	-10.52	6.99e-26	3.66e-24	g23322.t1
g36784.t1	3487.57	1.20137	0.114297	10.5109	7.69e-26	4.02e-24	g36784.t1
g38499.t1	898.853	-1.56417	0.148851	-10.5083	7.91e-26	4.13e-24	g38499.t1
g31041.t1	3177.81	-1.00821	0.0960486	-10.4969	8.93e-26	4.65e-24	g31041.t1
g8376.t1	6779.14	-1.79985	0.171511	-10.4941	9.2e-26	4.78e-24	g8376.t1
g25721.t1	422.738	-1.78055	0.169692	-10.4928	9.32e-26	4.83e-24	g25721.t1
g38106.t1	114.009	3.02963	0.2888	10.4904	9.56e-26	4.95e-24	g38106.t1
g31463.t1	1735.08	-1.09371	0.104262	-10.4901	9.6e-26	4.96e-24	g31463.t1
g19357.t1	8808.31	-1.13651	0.10835	-10.4893	9.67e-26	4.99e-24	g19357.t1
g2633.t1	207.9	2.43943	0.232596	10.4878	9.82e-26	5.05e-24	g2633.t1
g6348.t1	792.884	-1.12372	0.107146	-10.4878	9.83e-26	5.05e-24	g6348.t1
g9715.t1	2551.4	-1.39766	0.133393	-10.4778	1.09e-25	5.6e-24	g9715.t1
g12603.t1	13428.2	-1.6688	0.159372	-10.4711	1.17e-25	5.99e-24	g12603.t1
g10652.t1	2740.85	-1.0606	0.101369	-10.4627	1.28e-25	6.52e-24	g10652.t1
g2390.t1	633.167	1.94363	0.185833	10.459	1.33e-25	6.77e-24	g2390.t1
g6355.t1	1252.04	-1.24456	0.11906	-10.4532	1.42e-25	7.19e-24	g6355.t1
g34620.t1	494.845	1.47164	0.140859	10.4476	1.5e-25	7.61e-24	g34620.t1
g20286.t1	1068.26	-1.38212	0.132524	-10.4292	1.82e-25	9.21e-24	g20286.t1
g12471.t1	6815.17	-1.60981	0.154369	-10.4283	1.84e-25	9.28e-24	g12471.t1
g41939.t1	8591.03	-2.72033	0.260897	-10.4268	1.87e-25	9.41e-24	g41939.t1
g39170.t1	313.6	-2.01546	0.193378	-10.4224	1.96e-25	9.84e-24	g39170.t1
g33180.t1	489.591	-1.48107	0.142153	-10.4188	2.03e-25	1.02e-23	g33180.t1
g26278.t1	5318.42	-1.24729	0.119777	-10.4134	2.15e-25	1.08e-23	g26278.t1
g40634.t1	3712.45	-1.73413	0.166575	-10.4105	2.22e-25	1.11e-23	g40634.t1
g41906.t1	781.606	1.07573	0.103386	10.405	2.35e-25	1.17e-23	g41906.t1
g39869.t1	3632.31	-1.56573	0.15064	-10.3938	2.64e-25	1.32e-23	g39869.t1
g42070.t1	752.035	-1.85125	0.178124	-10.393	2.67e-25	1.33e-23	g42070.t1
g25099.t1	1558.64	1.22766	0.118237	10.383	2.96e-25	1.47e-23	g25099.t1
g43327.t1	4880.59	1.50009	0.144558	10.377	3.15e-25	1.56e-23	g43327.t1
g2127.t1	1486.37	1.21024	0.116719	10.3688	3.44e-25	1.7e-23	g2127.t1
g34540.t1	960.859	-1.03501	0.100008	-10.3492	4.22e-25	2.08e-23	g34540.t1
g27528.t1	1087.58	-1.58933	0.153737	-10.338	4.74e-25	2.34e-23	g27528.t1
g24045.t1	572.43	1.34603	0.130222	10.3364	4.82e-25	2.37e-23	g24045.t1
g27737.t1	2834.85	-1.03074	0.099755	-10.3327	5.01e-25	2.46e-23	g27737.t1
g23245.t1	198.871	2.18438	0.211775	10.3146	6.05e-25	2.96e-23	g23245.t1
g40636.t1	862.945	-1.01536	0.0984677	-10.3116	6.25e-25	3.05e-23	g40636.t1
g2540.t1	544.371	-2.31004	0.22413	-10.3067	6.57e-25	3.2e-23	g2540.t1
g2629.t1	831.928	-1.16095	0.112649	-10.3059	6.63e-25	3.22e-23	g2629.t1
g30940.t1	218.214	2.04428	0.198364	10.3057	6.64e-25	3.22e-23	g30940.t1
g4313.t1	2337.25	1.67433	0.162488	10.3044	6.73e-25	3.26e-23	g4313.t1
g1395.t1	436.126	-2.10055	0.203864	-10.3037	6.78e-25	3.27e-23	g1395.t1
g17286.t1	1264.12	1.51583	0.147191	10.2983	7.17e-25	3.46e-23	g17286.t1
g23194.t1	2720.06	1.36497	0.132811	10.2775	8.9e-25	4.28e-23	g23194.t1
g36947.t1	217.904	2.90396	0.283023	10.2605	1.06e-24	5.1e-23	g36947.t1
g27443.t1	5249	1.7233	0.16812	10.2504	1.18e-24	5.64e-23	g27443.t1
g6157.t1	8637.18	1.03444	0.100923	10.2497	1.19e-24	5.67e-23	g6157.t1
g4117.t1	402.237	-1.54791	0.151044	-10.2481	1.21e-24	5.76e-23	g4117.t1
g1650.t1	125.118	-3.28339	0.320607	-10.2412	1.3e-24	6.18e-23	g1650.t1
g43172.t1	3740.28	-2.11854	0.207085	-10.2303	1.45e-24	6.89e-23	g43172.t1
g7094.t1	2500.08	1.20036	0.117358	10.2282	1.48e-24	7.03e-23	g7094.t1
g22990.t1	6804.3	1.66814	0.163233	10.2193	1.62e-24	7.69e-23	g22990.t1
g24890.t1	535.14	-1.7618	0.172772	-10.1973	2.04e-24	9.64e-23	g24890.t1
g29480.t1	3517.32	-1.29468	0.127045	-10.1907	2.18e-24	1.03e-22	g29480.t1
g2235.t1	616.168	-1.30075	0.127765	-10.1808	2.42e-24	1.14e-22	g2235.t1
g9182.t1	716.506	1.45979	0.143467	10.1751	2.56e-24	1.2e-22	g9182.t1
g31645.t1	2829.12	1.24016	0.121988	10.1663	2.8e-24	1.32e-22	g31645.t1
g35839.t1	719.846	1.46789	0.144424	10.1638	2.88e-24	1.35e-22	g35839.t1
g31697.t1	778.017	-1.61468	0.158932	-10.1596	3e-24	1.4e-22	g31697.t1
g9184.t1	545.395	1.50751	0.148403	10.1582	3.05e-24	1.42e-22	g9184.t1
g15113.t1	1987.87	-1.12046	0.110413	-10.1479	3.39e-24	1.58e-22	g15113.t1
g15397.t1	462.337	-1.72327	0.169849	-10.1459	3.46e-24	1.61e-22	g15397.t1
g9892.t1	1145.77	-1.51895	0.149936	-10.1306	4.04e-24	1.87e-22	g9892.t1
g3887.t1	4047.5	1.05827	0.104505	10.1265	4.21e-24	1.95e-22	g3887.t1
g20902.t1	1017.42	-1.7172	0.169661	-10.1213	4.44e-24	2.05e-22	g20902.t1
g41622.t1	3654.63	-1.14346	0.112977	-10.1212	4.45e-24	2.05e-22	g41622.t1
g43679.t1	6929.75	-2.81397	0.278042	-10.1207	4.47e-24	2.06e-22	g43679.t1
g45512.t1	788.92	1.38194	0.136599	10.1168	4.66e-24	2.14e-22	g45512.t1
g40018.t1	2049.31	-1.85051	0.18292	-10.1165	4.67e-24	2.15e-22	g40018.t1
g40539.t1	2929.51	1.15181	0.113856	10.1164	4.67e-24	2.15e-22	g40539.t1
g35343.t1	1101.86	1.25306	0.123876	10.1154	4.72e-24	2.16e-22	g35343.t1
g30387.t3	7227.84	1.43416	0.141835	10.1115	4.91e-24	2.25e-22	g30387.t3
g24592.t1	4620.51	-1.32336	0.130899	-10.1098	5e-24	2.28e-22	g24592.t1
g33095.t1	1860.09	-2.78743	0.275788	-10.1072	5.14e-24	2.34e-22	g33095.t1
g11657.t1	1281.68	-1.24648	0.123395	-10.1015	5.44e-24	2.47e-22	g11657.t1
g39763.t1	1309.33	-1.67255	0.165603	-10.0998	5.54e-24	2.51e-22	g39763.t1
g31263.t1	1165.12	-1.39305	0.138018	-10.0932	5.92e-24	2.68e-22	g31263.t1
g29995.t1	3048.37	-1.29028	0.127938	-10.0852	6.42e-24	2.9e-22	g29995.t1
g26159.t1	1046.54	-1.26785	0.12588	-10.0719	7.35e-24	3.31e-22	g26159.t1
g32929.t1	755.154	-1.60336	0.159204	-10.0711	7.41e-24	3.33e-22	g32929.t1
g39547.t1	986.504	-1.49657	0.148628	-10.0693	7.55e-24	3.38e-22	g39547.t1
g13957.t1	1552.21	-1.42873	0.141925	-10.0668	7.75e-24	3.47e-22	g13957.t1
g31131.t1	875.193	-1.46618	0.145786	-10.057	8.56e-24	3.82e-22	g31131.t1
g45723.t1	469.399	-2.32588	0.231433	-10.0499	9.19e-24	4.1e-22	g45723.t1
g31426.t1	615.543	-1.66966	0.166411	-10.0334	1.09e-23	4.84e-22	g31426.t1
g34641.t1	997.828	1.17178	0.116789	10.0333	1.09e-23	4.84e-22	g34641.t1
g30128.t1	2317.45	-1.36398	0.135979	-10.0308	1.12e-23	4.94e-22	g30128.t1
g31372.t1	178.533	-2.15808	0.215143	-10.0309	1.12e-23	4.94e-22	g31372.t1
g38438.t1	1622.27	1.78109	0.177612	10.028	1.15e-23	5.08e-22	g38438.t1
g2905.t1	4313.35	-1.4501	0.14465	-10.0249	1.19e-23	5.24e-22	g2905.t1
g16299.t1	1726.32	-1.1175	0.111489	-10.0234	1.2e-23	5.31e-22	g16299.t1
g13565.t1	848.914	1.18158	0.117919	10.0203	1.24e-23	5.46e-22	g13565.t1
g44217.t1	4243.25	1.02989	0.102781	10.0202	1.24e-23	5.46e-22	g44217.t1
g4966.t1	4751.84	1.09816	0.109811	10.0005	1.52e-23	6.66e-22	g4966.t1
g41165.t1	2619.24	-1.57657	0.157662	-9.99968	1.53e-23	6.7e-22	g41165.t1
g10240.t1	1334.98	1.98457	0.198477	9.99897	1.54e-23	6.74e-22	g10240.t1
g44195.t1	729.056	-1.53252	0.153333	-9.99477	1.61e-23	7.02e-22	g44195.t1
g28097.t1	1910.76	-1.09708	0.109934	-9.97942	1.88e-23	8.18e-22	g28097.t1
g7171.t1	1014.72	1.04656	0.104932	9.97371	1.99e-23	8.64e-22	g7171.t1
g31760.t1	557.48	-1.36936	0.137353	-9.96964	2.07e-23	8.97e-22	g31760.t1
g45206.t1	330.378	-12.077	1.21138	-9.96963	2.07e-23	8.97e-22	g45206.t1
g12602.t1	15448.1	-1.82026	0.182945	-9.94974	2.53e-23	1.09e-21	g12602.t1
g7278.t1	779.761	-1.2865	0.129325	-9.94786	2.58e-23	1.11e-21	g7278.t1
g18831.t1	15774.5	2.26161	0.227376	9.9466	2.61e-23	1.13e-21	g18831.t1
g34375.t1	859.393	1.16895	0.117535	9.94558	2.64e-23	1.14e-21	g34375.t1
g44598.t1	1168.18	-1.19971	0.120645	-9.94412	2.68e-23	1.15e-21	g44598.t1
g41666.t1	654.105	-1.60092	0.161189	-9.93194	3.02e-23	1.3e-21	g41666.t1
g16682.t1	669.38	-1.13758	0.114563	-9.92974	3.09e-23	1.32e-21	g16682.t1
g10241.t1	1567.05	1.68609	0.169905	9.92373	3.28e-23	1.4e-21	g10241.t1
g20279.t1	1471.59	-1.50366	0.15166	-9.91469	3.59e-23	1.54e-21	g20279.t1
g3211.t1	746.94	-1.28931	0.130066	-9.91271	3.67e-23	1.56e-21	g3211.t1
g12655.t1	1293.86	-1.32154	0.13337	-9.90885	3.81e-23	1.62e-21	g12655.t1
g29089.t1	7151.76	1.87756	0.189726	9.89619	4.32e-23	1.83e-21	g29089.t1
g41321.t1	3844.49	-1.07823	0.108961	-9.89551	4.35e-23	1.84e-21	g41321.t1
g23145.t1	1461.85	-1.99168	0.201332	-9.8925	4.49e-23	1.9e-21	g23145.t1
g4211.t1	2924.92	1.07249	0.108449	9.88934	4.63e-23	1.95e-21	g4211.t1
g5015.t1	623.913	1.40323	0.141921	9.88739	4.72e-23	1.99e-21	g5015.t1
g32117.t1	1262.3	2.23508	0.226256	9.87852	5.16e-23	2.16e-21	g32117.t1
g23777.t1	1617.74	1.14268	0.115794	9.86825	5.72e-23	2.39e-21	g23777.t1
g45695.t1	480.467	-1.68327	0.170598	-9.86686	5.8e-23	2.42e-21	g45695.t1
g31049.t1	30454.1	1.81036	0.183651	9.85763	6.35e-23	2.65e-21	g31049.t1
g15164.t1	851.081	-1.25672	0.127523	-9.8549	6.53e-23	2.72e-21	g15164.t1
g15416.t1	206.737	2.20944	0.224638	9.83556	7.91e-23	3.28e-21	g15416.t1
g5325.t1	1328.98	1.24507	0.12661	9.83395	8.04e-23	3.33e-21	g5325.t1
g23985.t1	162.305	2.65029	0.269578	9.83124	8.26e-23	3.42e-21	g23985.t1
g37970.t1	997.353	-1.20187	0.122627	-9.80104	1.11e-22	4.61e-21	g37970.t1
g34545.t1	371.061	-1.79706	0.183458	-9.7955	1.18e-22	4.86e-21	g34545.t1
g3189.t1	1141.96	-1.21604	0.124175	-9.79295	1.21e-22	4.98e-21	g3189.t1
g39002.t1	6911.82	1.08759	0.111086	9.79051	1.24e-22	5.09e-21	g39002.t1
g35381.t1	508.629	-2.07747	0.212475	-9.77751	1.41e-22	5.78e-21	g35381.t1
g420.t1	768.566	-1.89268	0.193668	-9.77277	1.47e-22	6.05e-21	g420.t1
g42657.t1	2292.04	1.04848	0.107371	9.76494	1.59e-22	6.53e-21	g42657.t1
g27146.t1	745.506	-1.09016	0.11172	-9.75794	1.71e-22	6.99e-21	g27146.t1
g29846.t1	1960.42	-1.31046	0.134318	-9.75638	1.73e-22	7.08e-21	g29846.t1
g16562.t1	634.09	-2.2535	0.230997	-9.75553	1.75e-22	7.13e-21	g16562.t1
g5546.t1	7138.98	-1.21071	0.124244	-9.74465	1.94e-22	7.92e-21	g5546.t1
g17550.t1	2545.04	-1.11617	0.114671	-9.73368	2.17e-22	8.81e-21	g17550.t1
g12850.t1	751.207	1.13903	0.117226	9.71661	2.56e-22	1.04e-20	g12850.t1
g13862.t1	2071.2	-1.31813	0.135934	-9.69686	3.11e-22	1.26e-20	g13862.t1
g38722.t1	4620.02	-1.31128	0.135245	-9.69555	3.15e-22	1.27e-20	g38722.t1
g39292.t1	1994.76	-1.64892	0.170198	-9.68821	3.38e-22	1.36e-20	g39292.t1
g43778.t1	572.379	-1.41488	0.146076	-9.68593	3.46e-22	1.39e-20	g43778.t1
g27863.t1	174.687	2.3731	0.245016	9.68545	3.48e-22	1.4e-20	g27863.t1
g6553.t1	14900.4	-2.07377	0.21425	-9.67921	3.7e-22	1.48e-20	g6553.t1
g21291.t1	6047.64	1.31601	0.136129	9.66731	4.15e-22	1.66e-20	g21291.t1
g27330.t1	1885.47	-1.54245	0.159553	-9.66734	4.15e-22	1.66e-20	g27330.t1
g36096.t1	516.924	-1.29332	0.133791	-9.66669	4.18e-22	1.67e-20	g36096.t1
g29784.t1	3300.23	-1.17389	0.121482	-9.66314	4.32e-22	1.73e-20	g29784.t1
g14251.t1	1205.81	-1.40998	0.146381	-9.63227	5.84e-22	2.32e-20	g14251.t1
g43053.t1	277.708	1.67581	0.17411	9.62503	6.27e-22	2.49e-20	g43053.t1
g35619.t1	1173.77	-2.02645	0.210668	-9.61917	6.64e-22	2.63e-20	g35619.t1
g10770.t2	3611.99	-1.36758	0.142195	-9.61769	6.73e-22	2.67e-20	g10770.t2
g17606.t2	790.294	1.51852	0.158448	9.58373	9.36e-22	3.7e-20	g17606.t2
g33249.t1	1373.74	-1.26096	0.131684	-9.57567	1.01e-21	4e-20	g33249.t1
g10562.t1	549.653	-1.47756	0.154312	-9.57515	1.02e-21	4.01e-20	g10562.t1
g42471.t1	1173.26	1.01922	0.106475	9.57242	1.04e-21	4.12e-20	g42471.t1
g1124.t1	749.728	-1.45683	0.152247	-9.56887	1.08e-21	4.25e-20	g1124.t1
g10573.t1	1692.41	1.77408	0.185601	9.55855	1.19e-21	4.68e-20	g10573.t1
g45244.t1	5831.8	1.02371	0.107099	9.55858	1.19e-21	4.68e-20	g45244.t1
g26629.t1	1209.14	-1.52001	0.15903	-9.55801	1.2e-21	4.7e-20	g26629.t1
g37627.t1	1523.65	-1.29046	0.135102	-9.55176	1.28e-21	4.99e-20	g37627.t1
g19016.t1	847.725	-1.04248	0.10915	-9.55091	1.29e-21	5.02e-20	g19016.t1
g16508.t2	540.229	-2.38844	0.2501	-9.54993	1.3e-21	5.06e-20	g16508.t2
g26238.t1	5219.72	1.43011	0.149796	9.54702	1.33e-21	5.2e-20	g26238.t1
g33695.t1	690.846	-2.51227	0.263268	-9.54263	1.39e-21	5.42e-20	g33695.t1
g16779.t1	4913.91	-1.10203	0.115498	-9.54162	1.41e-21	5.46e-20	g16779.t1
g8564.t1	924.143	-1.8554	0.195005	-9.51464	1.82e-21	7.07e-20	g8564.t1
g1672.t1	2199.63	-1.89129	0.198805	-9.51333	1.85e-21	7.15e-20	g1672.t1
g30326.t1	1626.03	-2.08593	0.219287	-9.51235	1.86e-21	7.21e-20	g30326.t1
g27707.t1	1881.77	-1.25789	0.132284	-9.50906	1.92e-21	7.42e-20	g27707.t1
g27429.t1	236.742	-1.62992	0.17142	-9.50836	1.94e-21	7.46e-20	g27429.t1
g44660.t1	743.685	-1.89284	0.199145	-9.50482	2e-21	7.71e-20	g44660.t1
g11985.t1	870.587	1.24567	0.131071	9.50372	2.03e-21	7.78e-20	g11985.t1
g29255.t1	191.779	-1.88903	0.198829	-9.50076	2.08e-21	8e-20	g29255.t1
g10574.t1	332.234	-2.56291	0.270091	-9.48907	2.33e-21	8.92e-20	g10574.t1
g11515.t1	775.998	-2.0146	0.212335	-9.48783	2.36e-21	9.02e-20	g11515.t1
g5337.t1	219.985	-1.85406	0.195456	-9.4858	2.41e-21	9.18e-20	g5337.t1
g1033.t1	131.341	-2.82561	0.298088	-9.47912	2.56e-21	9.78e-20	g1033.t1
g20961.t1	4556.04	-1.06255	0.112105	-9.47816	2.59e-21	9.86e-20	g20961.t1
g334.t1	732.038	-1.19558	0.126317	-9.46494	2.94e-21	1.12e-19	g334.t1
g15715.t1	7840.62	1.63371	0.172631	9.46358	2.98e-21	1.13e-19	g15715.t1
g2720.t1	1706.87	-1.3881	0.146722	-9.46075	3.06e-21	1.16e-19	g2720.t1
g1337.t1	467.557	-1.31952	0.139483	-9.46005	3.08e-21	1.17e-19	g1337.t1
g44771.t1	534.985	1.44766	0.153206	9.44906	3.42e-21	1.29e-19	g44771.t1
g39021.t1	1132.49	-1.64001	0.173606	-9.44676	3.49e-21	1.32e-19	g39021.t1
g36453.t1	2107.48	-1.21888	0.129089	-9.44219	3.65e-21	1.38e-19	g36453.t1
g28980.t1	1672.81	-1.2138	0.128687	-9.43217	4.02e-21	1.51e-19	g28980.t1
g5324.t1	4135.25	-1.28656	0.136439	-9.42955	4.12e-21	1.55e-19	g5324.t1
g17757.t1	303.486	-1.68589	0.178964	-9.42028	4.5e-21	1.69e-19	g17757.t1
g11510.t1	459.677	-2.36094	0.250636	-9.41978	4.52e-21	1.7e-19	g11510.t1
g3348.t1	3804.64	-1.83287	0.194585	-9.41941	4.54e-21	1.7e-19	g3348.t1
g15467.t1	1033.01	-1.01442	0.107714	-9.41774	4.61e-21	1.72e-19	g15467.t1
g41618.t1	24624.7	1.29753	0.137775	9.41772	4.61e-21	1.72e-19	g41618.t1
g35916.t1	636.761	-1.53101	0.16264	-9.41353	4.8e-21	1.79e-19	g35916.t1
g15170.t1	1222.18	-1.61676	0.17181	-9.41017	4.95e-21	1.85e-19	g15170.t1
g35141.t1	141.803	2.29306	0.244035	9.39641	5.65e-21	2.1e-19	g35141.t1
g9153.t1	882.273	-1.31278	0.1398	-9.39045	5.97e-21	2.22e-19	g9153.t1
g3779.t1	920.208	-1.70082	0.181141	-9.38947	6.03e-21	2.24e-19	g3779.t1
g4536.t1	178.572	2.5838	0.27536	9.38334	6.39e-21	2.37e-19	g4536.t1
g35857.t1	284.521	-1.91301	0.204018	-9.3767	6.81e-21	2.52e-19	g35857.t1
g42367.t1	2314.39	-1.00844	0.107567	-9.37503	6.92e-21	2.56e-19	g42367.t1
g29723.t1	350.547	-1.33974	0.142909	-9.37477	6.93e-21	2.56e-19	g29723.t1
g1666.t1	2012.53	-1.54141	0.164741	-9.3566	8.23e-21	3.03e-19	g1666.t1
g8952.t1	1021.63	-1.82648	0.195346	-9.35	8.76e-21	3.22e-19	g8952.t1
g3870.t1	786.238	1.25183	0.133894	9.34947	8.81e-21	3.24e-19	g3870.t1
g35113.t1	2114.09	-1.11338	0.119127	-9.34618	9.09e-21	3.33e-19	g35113.t1
g3647.t1	935.388	-1.57924	0.169016	-9.34372	9.3e-21	3.4e-19	g3647.t1
g17711.t1	993.337	-1.07483	0.115072	-9.3405	9.59e-21	3.5e-19	g17711.t1
g4821.t1	3006.34	-1.33716	0.143171	-9.33962	9.67e-21	3.53e-19	g4821.t1
g1077.t1	961.373	-1.89835	0.203298	-9.33774	9.84e-21	3.59e-19	g1077.t1
g44516.t1	268.538	-2.49289	0.267084	-9.33373	1.02e-20	3.72e-19	g44516.t1
g15838.t1	140.971	-2.41145	0.258396	-9.33241	1.03e-20	3.76e-19	g15838.t1
g40372.t1	2785.81	-1.55682	0.166819	-9.33235	1.04e-20	3.76e-19	g40372.t1
g21075.t1	3104.31	-1.02919	0.110374	-9.32457	1.11e-20	4.03e-19	g21075.t1
g15555.t1	9387.03	-1.40191	0.150462	-9.31733	1.19e-20	4.31e-19	g15555.t1
g41315.t1	2810.15	1.19764	0.128607	9.31242	1.25e-20	4.51e-19	g41315.t1
g43209.t1	708.094	1.18112	0.126842	9.31172	1.26e-20	4.53e-19	g43209.t1
g14602.t1	1082.58	-1.18001	0.126761	-9.30893	1.29e-20	4.65e-19	g14602.t1
g35890.t1	1609.61	-1.3751	0.147749	-9.30701	1.31e-20	4.73e-19	g35890.t1
g7869.t1	506.114	-1.51853	0.163211	-9.30409	1.35e-20	4.85e-19	g7869.t1
g11700.t1	1443.76	-1.34609	0.144766	-9.29835	1.43e-20	5.11e-19	g11700.t1
g42524.t1	748.155	1.04288	0.11219	9.29563	1.46e-20	5.23e-19	g42524.t1
g8157.t1	278.122	-1.60277	0.172491	-9.29191	1.52e-20	5.41e-19	g8157.t1
g15810.t1	527.248	-1.57694	0.169851	-9.28426	1.63e-20	5.8e-19	g15810.t1
g21890.t1	332.254	-2.06153	0.222247	-9.27586	1.76e-20	6.27e-19	g21890.t1
g13917.t1	964.524	-1.05116	0.11334	-9.27438	1.79e-20	6.35e-19	g13917.t1
g3549.t1	1454.17	-1.41202	0.152477	-9.26054	2.03e-20	7.21e-19	g3549.t1
g32032.t1	781.641	-1.72636	0.186837	-9.23994	2.47e-20	8.71e-19	g32032.t1
g42452.t1	2197.25	-1.02079	0.110512	-9.23694	2.54e-20	8.93e-19	g42452.t1
g26085.t1	5155.56	-1.10261	0.119559	-9.22234	2.91e-20	1.02e-18	g26085.t1
g8942.t1	1912.75	-1.31032	0.142097	-9.2213	2.94e-20	1.03e-18	g8942.t1
g27241.t1	35018.6	1.58789	0.172306	9.21552	3.1e-20	1.08e-18	g27241.t1
g1878.t1	374.197	-2.3611	0.256288	-9.21271	3.18e-20	1.11e-18	g1878.t1
g26193.t1	1155.93	-1.32192	0.143497	-9.21218	3.2e-20	1.12e-18	g26193.t1
g8807.t1	428.756	1.42183	0.154351	9.21162	3.21e-20	1.12e-18	g8807.t1
g44013.t1	3231.77	-1.14037	0.123827	-9.20943	3.28e-20	1.14e-18	g44013.t1
g15073.t1	2652.5	-2.27736	0.247554	-9.19944	3.6e-20	1.25e-18	g15073.t1
g25865.t1	456.908	-2.05838	0.223775	-9.19845	3.63e-20	1.26e-18	g25865.t1
g34770.t1	652.779	-1.50032	0.163108	-9.19833	3.64e-20	1.26e-18	g34770.t1
g17763.t1	664.415	-1.14675	0.124678	-9.19772	3.66e-20	1.27e-18	g17763.t1
g4090.t1	482.828	-1.91118	0.207972	-9.18963	3.94e-20	1.36e-18	g4090.t1
g4815.t1	760.848	-2.61574	0.284863	-9.18246	4.21e-20	1.45e-18	g4815.t1
g5833.t1	364.417	-2.3078	0.251696	-9.169	4.77e-20	1.64e-18	g5833.t1
g18827.t1	2433.05	-1.04372	0.113843	-9.16809	4.81e-20	1.66e-18	g18827.t1
g10310.t1	3519.6	-2.1166	0.230925	-9.16573	4.92e-20	1.69e-18	g10310.t1
g36566.t1	219.822	1.64477	0.179471	9.16454	4.98e-20	1.71e-18	g36566.t1
g9852.t1	954.641	-1.70287	0.18591	-9.15965	5.21e-20	1.78e-18	g9852.t1
g19343.t1	398.275	1.72542	0.188418	9.15739	5.32e-20	1.82e-18	g19343.t1
g43035.t1	1184.99	1.02111	0.111534	9.15518	5.43e-20	1.85e-18	g43035.t1
g44954.t1	170.93	2.96939	0.324389	9.15379	5.5e-20	1.87e-18	g44954.t1
g41712.t1	1105.88	-1.07239	0.11716	-9.15324	5.52e-20	1.88e-18	g41712.t1
g24437.t1	1769	1.01708	0.111178	9.14829	5.78e-20	1.97e-18	g24437.t1
g12676.t1	1333.82	-1.4852	0.162513	-9.13895	6.31e-20	2.14e-18	g12676.t1
g35805.t1	240.98	1.82517	0.19992	9.1295	6.88e-20	2.33e-18	g35805.t1
g10675.t1	501.215	-1.88305	0.206269	-9.12909	6.91e-20	2.34e-18	g10675.t1
g30835.t1	1336.71	-1.27728	0.140169	-9.11241	8.06e-20	2.72e-18	g30835.t1
g27433.t2	1150.58	-1.47844	0.162266	-9.1112	8.15e-20	2.75e-18	g27433.t2
g22652.t1	543.698	-1.94678	0.213726	-9.10875	8.33e-20	2.81e-18	g22652.t1
g12312.t1	691.387	1.03376	0.113635	9.09726	9.26e-20	3.12e-18	g12312.t1
g45367.t1	569.396	-1.49484	0.164366	-9.09459	9.49e-20	3.19e-18	g45367.t1
g44422.t1	589.947	-1.64863	0.181511	-9.08279	1.06e-19	3.55e-18	g44422.t1
g4884.t1	276.018	-1.63714	0.18031	-9.07961	1.09e-19	3.66e-18	g4884.t1
g223.t1	19493.4	1.32281	0.145785	9.07369	1.15e-19	3.85e-18	g223.t1
g35941.t1	531.559	-1.96862	0.216967	-9.07334	1.15e-19	3.86e-18	g35941.t1
g8523.t1	1718.9	-1.22722	0.135267	-9.07263	1.16e-19	3.88e-18	g8523.t1
g33954.t1	692.651	-1.43667	0.158517	-9.0632	1.27e-19	4.23e-18	g33954.t1
g39053.t1	1049.53	-1.16036	0.128053	-9.06163	1.29e-19	4.29e-18	g39053.t1
g35710.t1	1500.39	-1.23457	0.136323	-9.05616	1.35e-19	4.5e-18	g35710.t1
g43800.t1	1019.73	-1.5466	0.170844	-9.05265	1.4e-19	4.64e-18	g43800.t1
g43064.t1	301.492	-2.53525	0.280123	-9.05049	1.42e-19	4.73e-18	g43064.t1
g9580.t1	520.295	-1.51769	0.167727	-9.04857	1.45e-19	4.81e-18	g9580.t1
g11926.t1	689.206	-2.15174	0.238012	-9.04048	1.56e-19	5.18e-18	g11926.t1
g19639.t1	2070.29	1.08974	0.120566	9.03856	1.59e-19	5.26e-18	g19639.t1
g9090.t1	2884.51	-1.56817	0.173627	-9.03186	1.69e-19	5.59e-18	g9090.t1
g34173.t1	479.99	-1.25464	0.138938	-9.03018	1.71e-19	5.67e-18	g34173.t1
g3221.t1	973.807	-2.30741	0.255593	-9.0277	1.75e-19	5.79e-18	g3221.t1
g29795.t1	271.57	-2.43234	0.269484	-9.02595	1.78e-19	5.88e-18	g29795.t1
g19926.t1	810.035	1.7593	0.194977	9.02312	1.83e-19	6.03e-18	g19926.t1
g37244.t1	1460.21	-1.11569	0.123687	-9.02027	1.88e-19	6.17e-18	g37244.t1
g6693.t1	978.063	1.22408	0.135725	9.01886	1.9e-19	6.24e-18	g6693.t1
g39628.t1	3484.49	1.06978	0.118629	9.0178	1.92e-19	6.29e-18	g39628.t1
g39655.t1	3922.22	-1.55985	0.173004	-9.01629	1.95e-19	6.36e-18	g39655.t1
g21861.t1	1260.72	1.08481	0.120328	9.01539	1.96e-19	6.41e-18	g21861.t1
g9389.t1	970.583	-2.15542	0.239099	-9.01474	1.97e-19	6.44e-18	g9389.t1
g24567.t1	650.586	-1.46052	0.16206	-9.01222	2.02e-19	6.58e-18	g24567.t1
g13920.t1	687.225	1.07507	0.119333	9.009	2.08e-19	6.77e-18	g13920.t1
g781.t1	955.485	1.23301	0.136963	9.00249	2.21e-19	7.18e-18	g781.t1
g19978.t1	676.647	1.16327	0.129222	9.00203	2.22e-19	7.2e-18	g19978.t1
g15368.t1	422.304	-1.70272	0.189192	-8.99994	2.26e-19	7.32e-18	g15368.t1
g29837.t1	260.798	-1.71095	0.190133	-8.99873	2.28e-19	7.4e-18	g29837.t1
g8708.t1	978.288	-1.55321	0.172615	-8.99815	2.3e-19	7.43e-18	g8708.t1
g39152.t1	1011.06	-1.0902	0.121204	-8.99474	2.37e-19	7.66e-18	g39152.t1
g15661.t1	1344.64	-1.42628	0.15866	-8.98956	2.48e-19	8.02e-18	g15661.t1
g2966.t1	1040.33	-2.14435	0.238584	-8.98783	2.52e-19	8.13e-18	g2966.t1
g8955.t1	243.275	2.38256	0.265235	8.98282	2.64e-19	8.51e-18	g8955.t1
g37946.t1	3511.92	1.92078	0.213852	8.98183	2.66e-19	8.57e-18	g37946.t1
g1703.t1	4022.6	-1.07823	0.120128	-8.97574	2.81e-19	9.05e-18	g1703.t1
g40144.t1	2172.25	-1.46318	0.163359	-8.95684	3.34e-19	1.07e-17	g40144.t1
g58.t1	232.204	-2.52153	0.281553	-8.95579	3.37e-19	1.08e-17	g58.t1
g32941.t1	1150.64	-1.06884	0.119406	-8.95126	3.51e-19	1.12e-17	g32941.t1
g30542.t1	413.548	-1.26312	0.141123	-8.95046	3.54e-19	1.13e-17	g30542.t1
g42496.t1	618.122	-1.70781	0.190924	-8.94494	3.72e-19	1.19e-17	g42496.t1
g11319.t1	783.548	-1.50175	0.168012	-8.93835	3.95e-19	1.26e-17	g11319.t1
g36009.t1	678.09	-1.60157	0.179271	-8.9338	4.12e-19	1.31e-17	g36009.t1
g17006.t1	2703.67	-1.35266	0.151583	-8.92354	4.52e-19	1.43e-17	g17006.t1
g35514.t1	398.475	-1.29857	0.14558	-8.91999	4.66e-19	1.47e-17	g35514.t1
g2388.t1	503.403	-1.3008	0.146061	-8.90584	5.3e-19	1.67e-17	g2388.t1
g14306.t1	272.206	-2.13175	0.239386	-8.90507	5.34e-19	1.68e-17	g14306.t1
g18657.t1	1074.65	-1.26276	0.141835	-8.90297	5.44e-19	1.71e-17	g18657.t1
g48.t1	521.669	-1.38094	0.155349	-8.88932	6.15e-19	1.93e-17	g48.t1
g31373.t1	167.445	-2.2364	0.251713	-8.8847	6.41e-19	2.01e-17	g31373.t1
g4747.t1	247.9	-1.89161	0.21308	-8.87746	6.84e-19	2.14e-17	g4747.t1
g6151.t1	817.551	1.67303	0.188577	8.87183	7.2e-19	2.25e-17	g6151.t1
g9469.t1	172.712	-2.042	0.230216	-8.86995	7.32e-19	2.28e-17	g9469.t1
g2038.t1	645.557	1.62766	0.183508	8.86968	7.34e-19	2.29e-17	g2038.t1
g10208.t1	1541.79	-1.88044	0.212111	-8.86537	7.63e-19	2.37e-17	g10208.t1
g30526.t1	1095.07	-1.29094	0.145696	-8.86047	7.97e-19	2.48e-17	g30526.t1
g26964.t1	377.575	1.42841	0.161246	8.85857	8.1e-19	2.51e-17	g26964.t1
g4213.t1	614.337	1.58521	0.178959	8.85796	8.15e-19	2.52e-17	g4213.t1
g698.t1	1946.77	-1.10144	0.124348	-8.8577	8.17e-19	2.53e-17	g698.t1
g30138.t1	139.917	-2.44812	0.276381	-8.85779	8.16e-19	2.53e-17	g30138.t1
g5077.t1	1381.85	-1.12055	0.126588	-8.85196	8.6e-19	2.66e-17	g5077.t1
g9850.t1	168.642	-2.05197	0.232009	-8.84436	9.21e-19	2.84e-17	g9850.t1
g22096.t1	2271.56	1.53363	0.173447	8.84207	9.4e-19	2.89e-17	g22096.t1
g27833.t1	342.549	-1.29469	0.146503	-8.83731	9.81e-19	3.02e-17	g27833.t1
g9088.t1	938.833	-1.08612	0.122905	-8.83708	9.82e-19	3.02e-17	g9088.t1
g28033.t1	975.116	1.0546	0.11944	8.82951	1.05e-18	3.23e-17	g28033.t1
g32240.t1	845.227	-1.32015	0.149576	-8.82595	1.09e-18	3.33e-17	g32240.t1
g1824.t1	131.958	-10.7529	1.21847	-8.82497	1.09e-18	3.35e-17	g1824.t1
g27653.t1	605.565	-1.71151	0.194166	-8.8147	1.2e-18	3.67e-17	g27653.t1
g23191.t1	1208.6	-1.16857	0.132768	-8.80157	1.35e-18	4.11e-17	g23191.t1
g12275.t1	604.015	-1.50018	0.170456	-8.80097	1.36e-18	4.13e-17	g12275.t1
g4266.t1	1033.21	-1.04164	0.118375	-8.79957	1.37e-18	4.18e-17	g4266.t1
g19001.t1	1856.95	-1.0134	0.115214	-8.79579	1.42e-18	4.31e-17	g19001.t1
g39718.t1	957.518	-1.69052	0.192215	-8.79495	1.43e-18	4.34e-17	g39718.t1
g26313.t1	1793.97	1.06505	0.121262	8.78304	1.59e-18	4.81e-17	g26313.t1
g937.t1	395.963	1.18782	0.135258	8.78189	1.61e-18	4.85e-17	g937.t1
g22769.t2	188.378	10.7426	1.22391	8.77732	1.67e-18	5.04e-17	g22769.t2
g1933.t1	229.22	11.0255	1.25629	8.77628	1.69e-18	5.08e-17	g1933.t1
g19123.t1	897.853	-1.42137	0.16198	-8.77497	1.71e-18	5.14e-17	g19123.t1
g23110.t1	633.67	-1.71539	0.195707	-8.76509	1.87e-18	5.6e-17	g23110.t1
g27299.t1	495.498	-1.64885	0.188231	-8.75971	1.96e-18	5.87e-17	g27299.t1
g7786.t1	805.92	1.02566	0.117102	8.75868	1.98e-18	5.92e-17	g7786.t1
g29761.t1	257.406	2.17546	0.248465	8.7556	2.03e-18	6.08e-17	g29761.t1
g40658.t1	882.573	-1.84994	0.211596	-8.7428	2.27e-18	6.79e-17	g40658.t1
g35002.t2	1287.64	-1.48394	0.169752	-8.74182	2.29e-18	6.84e-17	g35002.t2
g33783.t1	358.593	1.71421	0.196107	8.74123	2.31e-18	6.87e-17	g33783.t1
g35129.t1	964.369	-1.1657	0.133462	-8.73433	2.45e-18	7.3e-17	g35129.t1
g30925.t1	1733.14	-1.16977	0.133992	-8.73015	2.54e-18	7.56e-17	g30925.t1
g31101.t1	432.054	-2.19702	0.251657	-8.73021	2.54e-18	7.56e-17	g31101.t1
g1066.t1	2982.27	1.04551	0.119788	8.72806	2.59e-18	7.69e-17	g1066.t1
g1398.t1	5703.62	1.33351	0.152836	8.72508	2.66e-18	7.89e-17	g1398.t1
g42846.t1	608.98	-2.67318	0.306388	-8.7248	2.67e-18	7.9e-17	g42846.t1
g22702.t1	399.591	1.21779	0.139801	8.71087	3.02e-18	8.91e-17	g22702.t1
g35393.t1	1249.33	-1.51054	0.173418	-8.71041	3.03e-18	8.94e-17	g35393.t1
g23370.t1	313.343	-2.1966	0.252717	-8.69194	3.56e-18	1.05e-16	g23370.t1
g16272.t1	615.96	1.17818	0.135551	8.69181	3.57e-18	1.05e-16	g16272.t1
g41160.t1	210.884	-1.63954	0.188647	-8.69103	3.59e-18	1.06e-16	g41160.t1
g7579.t1	270.252	1.89937	0.218586	8.68935	3.65e-18	1.07e-16	g7579.t1
g17522.t1	1207.62	-1.31525	0.151404	-8.68701	3.72e-18	1.09e-16	g17522.t1
g2657.t1	543.978	1.1295	0.130135	8.67948	3.98e-18	1.17e-16	g2657.t1
g15743.t1	693.627	-1.05555	0.121653	-8.67671	4.07e-18	1.19e-16	g15743.t1
g6631.t1	663.808	-1.23078	0.141862	-8.67588	4.1e-18	1.2e-16	g6631.t1
g9935.t1	865.968	-2.06112	0.237602	-8.67466	4.15e-18	1.21e-16	g9935.t1
g12727.t1	709.594	-1.63994	0.189059	-8.67423	4.16e-18	1.22e-16	g12727.t1
g41731.t1	2810.1	-1.18287	0.136398	-8.67226	4.24e-18	1.24e-16	g41731.t1
g7775.t1	966.141	-1.50772	0.17394	-8.66806	4.4e-18	1.28e-16	g7775.t1
g20033.t1	1625.36	-1.68671	0.194637	-8.66591	4.48e-18	1.3e-16	g20033.t1
g35888.t1	917.369	-1.86363	0.21508	-8.66481	4.52e-18	1.32e-16	g35888.t1
g46166.t1	541.4	-1.65573	0.191173	-8.66089	4.68e-18	1.36e-16	g46166.t1
g17374.t1	799.625	1.79849	0.207707	8.65881	4.77e-18	1.38e-16	g17374.t1
g3548.t1	1021.56	-1.44752	0.167198	-8.65751	4.82e-18	1.4e-16	g3548.t1
g22882.t1	1808.73	-1.29691	0.14994	-8.64954	5.17e-18	1.5e-16	g22882.t1
g5232.t1	936.64	1.26721	0.146511	8.64919	5.19e-18	1.5e-16	g5232.t1
g3766.t1	562.128	1.3768	0.159276	8.64413	5.42e-18	1.56e-16	g3766.t1
g20962.t1	993.77	-1.19146	0.137891	-8.64058	5.59e-18	1.61e-16	g20962.t1
g5767.t1	1000.06	-1.0311	0.119361	-8.63845	5.7e-18	1.64e-16	g5767.t1
g4735.t1	572.51	-1.06521	0.123319	-8.63779	5.73e-18	1.65e-16	g4735.t1
g3332.t1	615.387	-1.77088	0.205101	-8.6342	5.91e-18	1.7e-16	g3332.t1
g30850.t2	873.443	1.46768	0.170091	8.62876	6.2e-18	1.78e-16	g30850.t2
g23202.t1	937.005	-1.0615	0.12305	-8.62658	6.32e-18	1.81e-16	g23202.t1
g29463.t1	121.541	-2.02556	0.234896	-8.62322	6.51e-18	1.87e-16	g29463.t1
g3864.t2	698.729	-2.13521	0.247629	-8.62263	6.54e-18	1.87e-16	g3864.t2
g38105.t1	29236.5	1.57257	0.182523	8.61571	6.95e-18	1.99e-16	g38105.t1
g38431.t1	300.593	-1.31699	0.152932	-8.61161	7.2e-18	2.06e-16	g38431.t1
g6416.t1	1296.8	-1.29388	0.150358	-8.60529	7.61e-18	2.17e-16	g6416.t1
g39601.t1	1034.13	-1.73754	0.201918	-8.60518	7.62e-18	2.17e-16	g39601.t1
g8691.t1	1032.03	-1.80155	0.20938	-8.60424	7.68e-18	2.19e-16	g8691.t1
g29431.t1	725.857	1.36325	0.158461	8.60306	7.76e-18	2.21e-16	g29431.t1
g29697.t1	517.345	-1.42344	0.165555	-8.59803	8.11e-18	2.3e-16	g29697.t1
g39693.t1	337.734	-1.26287	0.146918	-8.59576	8.27e-18	2.35e-16	g39693.t1
g33659.t1	1531.78	-1.48826	0.173279	-8.58882	8.79e-18	2.49e-16	g33659.t1
g24766.t1	733.178	1.48707	0.173221	8.58483	9.1e-18	2.57e-16	g24766.t1
g16699.t2	272.3	-1.88825	0.21999	-8.58336	9.21e-18	2.6e-16	g16699.t2
g13453.t1	464.88	-1.407	0.16396	-8.58137	9.37e-18	2.65e-16	g13453.t1
g14083.t1	990.321	-1.44595	0.168501	-8.58124	9.39e-18	2.65e-16	g14083.t1
g5458.t1	716.019	-1.47114	0.17158	-8.57404	9.99e-18	2.81e-16	g5458.t1
g3973.t1	1881.91	1.25526	0.146463	8.57047	1.03e-17	2.9e-16	g3973.t1
g36392.t1	298.735	1.3204	0.154124	8.56711	1.06e-17	2.98e-16	g36392.t1
g34563.t1	864.945	2.22656	0.259912	8.5666	1.07e-17	2.99e-16	g34563.t1
g30463.t1	938.681	-1.83729	0.214626	-8.56043	1.12e-17	3.15e-16	g30463.t1
g33885.t1	4118.42	-1.05606	0.123537	-8.54855	1.25e-17	3.48e-16	g33885.t1
g39743.t1	945.022	-1.02171	0.119603	-8.54253	1.31e-17	3.66e-16	g39743.t1
g27298.t1	237.719	-2.52273	0.295434	-8.53906	1.35e-17	3.77e-16	g27298.t1
g32310.t1	751.789	-1.14387	0.134021	-8.53506	1.4e-17	3.9e-16	g32310.t1
g29420.t1	996.118	-1.50981	0.176905	-8.53457	1.41e-17	3.91e-16	g29420.t1
g14851.t1	591.567	-2.09763	0.245857	-8.53192	1.44e-17	4e-16	g14851.t1
g24512.t1	103.924	-10.4082	1.21996	-8.53161	1.44e-17	4.01e-16	g24512.t1
g35002.t1	1014.44	-1.38964	0.163081	-8.52112	1.58e-17	4.38e-16	g35002.t1
g43911.t1	450.291	-1.92977	0.226473	-8.52098	1.58e-17	4.38e-16	g43911.t1
g26246.t1	336.352	-1.33098	0.156205	-8.52072	1.59e-17	4.39e-16	g26246.t1
g9116.t1	75.6885	2.83234	0.332538	8.51734	1.63e-17	4.51e-16	g9116.t1
g4340.t1	2810.96	-1.57481	0.184939	-8.51526	1.66e-17	4.59e-16	g4340.t1
g24727.t1	2975.84	-1.0978	0.128951	-8.51331	1.69e-17	4.67e-16	g24727.t1
g40806.t1	998.381	1.0132	0.11933	8.49081	2.05e-17	5.64e-16	g40806.t1
g966.t1	683.525	-1.39779	0.164635	-8.49024	2.06e-17	5.66e-16	g966.t1
g8897.t1	182.388	-1.64428	0.194031	-8.47434	2.36e-17	6.47e-16	g8897.t1
g168.t1	1007.94	1.0132	0.119579	8.47313	2.39e-17	6.53e-16	g168.t1
g20694.t1	2176.23	-1.43799	0.169717	-8.47289	2.39e-17	6.54e-16	g20694.t1
g35670.t1	927.851	-1.01798	0.120228	-8.46711	2.52e-17	6.86e-16	g35670.t1
g26241.t1	410.556	-1.54371	0.182446	-8.46122	2.65e-17	7.2e-16	g26241.t1
g18164.t1	105.939	-2.24465	0.265292	-8.46107	2.65e-17	7.21e-16	g18164.t1
g16932.t1	598.134	-2.05366	0.242743	-8.46024	2.67e-17	7.25e-16	g16932.t1
g30260.t1	297.147	2.11681	0.250265	8.45827	2.71e-17	7.37e-16	g30260.t1
g6808.t1	493.28	-1.42066	0.168014	-8.45556	2.78e-17	7.53e-16	g6808.t1
g35858.t1	736.169	-1.1181	0.132278	-8.45262	2.85e-17	7.71e-16	g35858.t1
g5228.t1	646.92	-1.12214	0.133007	-8.43667	3.26e-17	8.83e-16	g5228.t1
g34347.t1	348.973	-1.18759	0.140776	-8.43604	3.28e-17	8.87e-16	g34347.t1
g20754.t1	774.167	-1.4163	0.167924	-8.43416	3.34e-17	9e-16	g20754.t1
g34146.t1	503.052	-1.2073	0.14338	-8.42025	3.76e-17	1.01e-15	g34146.t1
g44752.t1	347.27	-2.37838	0.282536	-8.41798	3.83e-17	1.03e-15	g44752.t1
g33232.t1	2014.09	-1.1301	0.134279	-8.41607	3.89e-17	1.04e-15	g33232.t1
g28314.t1	1183.92	-1.1768	0.139875	-8.41322	3.99e-17	1.07e-15	g28314.t1
g31640.t1	437.198	2.18256	0.259435	8.41275	4.01e-17	1.07e-15	g31640.t1
g19051.t1	1233.65	1.00278	0.119213	8.41168	4.04e-17	1.08e-15	g19051.t1
g7848.t1	509.045	-1.52926	0.182078	-8.39892	4.51e-17	1.2e-15	g7848.t1
g25919.t1	1913.42	-2.44381	0.291039	-8.39684	4.59e-17	1.22e-15	g25919.t1
g22836.t1	733.252	-1.2917	0.153847	-8.39598	4.62e-17	1.23e-15	g22836.t1
g12463.t1	523.833	1.32812	0.158193	8.39552	4.64e-17	1.23e-15	g12463.t1
g44551.t1	624.808	1.19945	0.142881	8.39472	4.67e-17	1.24e-15	g44551.t1
g2995.t1	1398.68	-1.21081	0.144382	-8.38613	5.02e-17	1.33e-15	g2995.t1
g29272.t1	456.885	-1.32296	0.157755	-8.38613	5.02e-17	1.33e-15	g29272.t1
g35621.t1	488.8	-1.53023	0.182692	-8.37603	5.47e-17	1.45e-15	g35621.t1
g26700.t1	493.336	1.16887	0.139564	8.37514	5.52e-17	1.46e-15	g26700.t1
g42653.t1	285.345	-1.78938	0.213658	-8.37498	5.52e-17	1.46e-15	g42653.t1
g14095.t1	126.869	-10.697	1.27753	-8.37319	5.61e-17	1.48e-15	g14095.t1
g33887.t1	264.843	-1.46588	0.175141	-8.36974	5.77e-17	1.52e-15	g33887.t1
g1627.t1	118.757	-2.10909	0.251993	-8.36961	5.78e-17	1.52e-15	g1627.t1
g42776.t1	471.345	-1.02477	0.122469	-8.36759	5.88e-17	1.55e-15	g42776.t1
g35938.t1	487.731	-1.85373	0.221595	-8.36538	5.99e-17	1.58e-15	g35938.t1
g7277.t1	1226.52	-1.30591	0.156232	-8.3588	6.34e-17	1.66e-15	g7277.t1
g19229.t1	381.76	-1.32389	0.15843	-8.3563	6.47e-17	1.7e-15	g19229.t1
g9265.t1	1172.81	1.66062	0.198763	8.35479	6.55e-17	1.72e-15	g9265.t1
g13530.t1	3546.33	-1.85167	0.221775	-8.34929	6.87e-17	1.79e-15	g13530.t1
g43434.t1	453.052	-1.71908	0.20603	-8.34382	7.19e-17	1.88e-15	g43434.t1
g6593.t1	1874.44	-1.18437	0.142135	-8.33272	7.9e-17	2.05e-15	g6593.t1
g14590.t1	797.493	-1.12067	0.134558	-8.32852	8.19e-17	2.13e-15	g14590.t1
g36484.t1	291.926	-1.41934	0.17044	-8.32749	8.26e-17	2.14e-15	g36484.t1
g5023.t1	308.539	-1.73246	0.208049	-8.32719	8.28e-17	2.15e-15	g5023.t1
g13803.t1	1593.49	-1.55259	0.186629	-8.31912	8.86e-17	2.3e-15	g13803.t1
g32726.t1	2235.79	-1.75501	0.211102	-8.31357	9.29e-17	2.4e-15	g32726.t1
g9736.t1	875.181	1.01125	0.121706	8.30896	9.65e-17	2.49e-15	g9736.t1
g33431.t1	804.08	-1.59482	0.192134	-8.30054	1.04e-16	2.68e-15	g33431.t1
g4523.t1	485.056	-1.45775	0.175693	-8.29716	1.07e-16	2.75e-15	g4523.t1
g789.t1	2073.81	-1.21812	0.147002	-8.28641	1.17e-16	3.01e-15	g789.t1
g41435.t1	737.109	-1.02861	0.124153	-8.28508	1.18e-16	3.04e-15	g41435.t1
g4484.t1	959.602	-1.06986	0.129163	-8.28306	1.2e-16	3.09e-15	g4484.t1
g38928.t1	1418.66	-1.76336	0.212905	-8.28241	1.21e-16	3.1e-15	g38928.t1
g44876.t1	691.618	-1.7027	0.205589	-8.28206	1.21e-16	3.11e-15	g44876.t1
g36369.t1	504.72	-2.09333	0.252862	-8.27857	1.25e-16	3.19e-15	g36369.t1
g36370.t1	504.72	-2.09333	0.252862	-8.27857	1.25e-16	3.19e-15	g36370.t1
g23588.t1	1753.97	-1.16972	0.141304	-8.27798	1.25e-16	3.2e-15	g23588.t1
g16738.t1	178.116	-2.21415	0.267712	-8.27064	1.33e-16	3.41e-15	g16738.t1
g28699.t1	266.093	-1.50475	0.181991	-8.26831	1.36e-16	3.47e-15	g28699.t1
g27881.t1	2379.66	-1.92302	0.232581	-8.26814	1.36e-16	3.47e-15	g27881.t1
g18514.t1	776.745	1.05454	0.127562	8.26689	1.37e-16	3.51e-15	g18514.t1
g33356.t1	334.2	-2.98367	0.360954	-8.26607	1.38e-16	3.53e-15	g33356.t1
g11143.t1	383.488	-1.13462	0.137301	-8.26378	1.41e-16	3.59e-15	g11143.t1
g43624.t1	545.885	-1.37604	0.166529	-8.26308	1.42e-16	3.61e-15	g43624.t1
g25744.t1	419.001	-2.25866	0.273484	-8.25886	1.47e-16	3.74e-15	g25744.t1
g13427.t2	3894.23	-1.19134	0.144367	-8.25216	1.56e-16	3.95e-15	g13427.t2
g25866.t1	691.292	-1.20637	0.146196	-8.25172	1.56e-16	3.95e-15	g25866.t1
g29808.t1	386.736	-2.55204	0.309274	-8.25169	1.56e-16	3.95e-15	g29808.t1
g30076.t1	768.747	-1.96325	0.238092	-8.24576	1.64e-16	4.15e-15	g30076.t1
g12965.t1	2211.91	-1.79298	0.2176	-8.23984	1.72e-16	4.36e-15	g12965.t1
g15599.t1	580.47	1.16355	0.141219	8.23933	1.73e-16	4.37e-15	g15599.t1
g17005.t1	5748.51	-1.2902	0.156594	-8.23911	1.73e-16	4.38e-15	g17005.t1
g31498.t1	214.036	2.26718	0.275619	8.22578	1.94e-16	4.88e-15	g31498.t1
g2601.t1	1749.9	-1.23975	0.150809	-8.22069	2.02e-16	5.09e-15	g2601.t1
g5664.t1	966.461	-1.57244	0.19138	-8.21635	2.1e-16	5.27e-15	g5664.t1
g41787.t1	248.774	-1.43737	0.175021	-8.21258	2.16e-16	5.44e-15	g41787.t1
g44988.t1	2108.7	-1.8367	0.223834	-8.20561	2.29e-16	5.76e-15	g44988.t1
g2467.t1	1642.81	-1.88409	0.229637	-8.20462	2.31e-16	5.8e-15	g2467.t1
g23244.t1	991.896	-1.0176	0.124058	-8.20259	2.35e-16	5.89e-15	g23244.t1
g9747.t1	492.357	-1.15952	0.14145	-8.19738	2.46e-16	6.15e-15	g9747.t1
g235.t2	239.709	2.08036	0.253821	8.1962	2.48e-16	6.21e-15	g235.t2
g21570.t1	2294.55	-1.49297	0.182247	-8.19199	2.57e-16	6.42e-15	g21570.t1
g18553.t1	4197.92	1.86896	0.228377	8.18364	2.75e-16	6.86e-15	g18553.t1
g32643.t1	1372.05	-1.02135	0.124847	-8.18082	2.82e-16	7.02e-15	g32643.t1
g12885.t1	381.277	-2.08631	0.255118	-8.17783	2.89e-16	7.19e-15	g12885.t1
g15654.t1	1139.12	1.24902	0.153006	8.16321	3.26e-16	8.09e-15	g15654.t1
g22427.t1	845.5	-1.47084	0.180333	-8.15624	3.46e-16	8.55e-15	g22427.t1
g26300.t1	766.263	-2.75032	0.337269	-8.15468	3.5e-16	8.65e-15	g26300.t1
g16378.t1	401.085	-1.18496	0.145325	-8.15383	3.53e-16	8.7e-15	g16378.t1
g21908.t1	193.711	1.92943	0.236697	8.15149	3.59e-16	8.87e-15	g21908.t1
g28738.t1	108.176	2.58957	0.317794	8.14858	3.68e-16	9.08e-15	g28738.t1
g4925.t1	526.969	-1.34755	0.165431	-8.14568	3.77e-16	9.29e-15	g4925.t1
g9097.t1	602.025	1.21452	0.149127	8.14419	3.82e-16	9.4e-15	g9097.t1
g36148.t1	408.916	-1.38184	0.169684	-8.14364	3.84e-16	9.42e-15	g36148.t1
g2797.t1	440.502	-1.72206	0.211531	-8.14091	3.92e-16	9.61e-15	g2797.t1
g31289.t1	420.547	-1.48483	0.182439	-8.13875	3.99e-16	9.78e-15	g31289.t1
g16699.t1	910.998	-1.16823	0.143623	-8.134	4.15e-16	1.02e-14	g16699.t1
g40163.t1	1206.35	1.00061	0.123041	8.13234	4.21e-16	1.03e-14	g40163.t1
g11915.t1	409.05	1.31227	0.161425	8.12928	4.32e-16	1.05e-14	g11915.t1
g43121.t1	7591.13	-1.63836	0.201665	-8.12417	4.5e-16	1.1e-14	g43121.t1
g10242.t1	1465.18	1.92274	0.236712	8.12267	4.56e-16	1.11e-14	g10242.t1
g26248.t1	8626.64	-1.28357	0.158131	-8.11712	4.77e-16	1.16e-14	g26248.t1
g44024.t1	661.821	-1.52882	0.188434	-8.11325	4.93e-16	1.2e-14	g44024.t1
g9934.t1	678.452	-1.17433	0.144759	-8.1123	4.97e-16	1.21e-14	g9934.t1
g24865.t2	720.055	-1.76647	0.217779	-8.11126	5.01e-16	1.22e-14	g24865.t2
g28829.t1	210.225	-1.804	0.222635	-8.10295	5.36e-16	1.3e-14	g28829.t1
g7907.t1	1231.38	1.19171	0.147093	8.10172	5.42e-16	1.31e-14	g7907.t1
g16040.t1	476.516	-1.64309	0.202839	-8.10046	5.48e-16	1.32e-14	g16040.t1
g27143.t1	188.132	1.74765	0.215823	8.09763	5.6e-16	1.35e-14	g27143.t1
g33545.t1	1591.3	-1.28839	0.159133	-8.09631	5.67e-16	1.37e-14	g33545.t1
g38998.t1	1918.22	-1.06264	0.13127	-8.09503	5.73e-16	1.38e-14	g38998.t1
g38108.t1	2044.59	1.84231	0.22787	8.08491	6.22e-16	1.5e-14	g38108.t1
g19814.t1	396.206	-1.46555	0.181352	-8.08125	6.41e-16	1.54e-14	g19814.t1
g24948.t1	304.562	-2.40039	0.297147	-8.07813	6.58e-16	1.58e-14	g24948.t1
g45715.t1	89.2209	-10.1895	1.26142	-8.07778	6.6e-16	1.58e-14	g45715.t1
g37861.t1	444.963	-2.00788	0.248574	-8.07759	6.61e-16	1.58e-14	g37861.t1
g9590.t1	836.117	1.22854	0.152271	8.06811	7.14e-16	1.71e-14	g9590.t1
g21445.t1	407.954	-1.50513	0.186612	-8.06555	7.29e-16	1.74e-14	g21445.t1
g17499.t1	1197.73	-1.32313	0.16425	-8.05558	7.91e-16	1.89e-14	g17499.t1
g28120.t1	498.77	-1.57702	0.195766	-8.05565	7.91e-16	1.89e-14	g28120.t1
g24975.t1	548.27	-1.76806	0.219547	-8.0532	8.07e-16	1.92e-14	g24975.t1
g27700.t1	329.365	-1.63533	0.203109	-8.05149	8.18e-16	1.95e-14	g27700.t1
g30265.t1	643.913	1.34932	0.167647	8.04855	8.38e-16	1.99e-14	g30265.t1
g45931.t1	406.959	-1.81814	0.22627	-8.03527	9.34e-16	2.22e-14	g45931.t1
g27650.t1	362.762	1.51557	0.188765	8.0289	9.83e-16	2.33e-14	g27650.t1
g16227.t1	959.181	1.10919	0.138185	8.02685	1e-15	2.37e-14	g16227.t1
g27012.t1	599.049	-1.14823	0.143204	-8.01816	1.07e-15	2.54e-14	g27012.t1
g12742.t1	2225.5	1.17672	0.146938	8.00831	1.16e-15	2.75e-14	g12742.t1
g9617.t1	579.226	-1.7285	0.21586	-8.00748	1.17e-15	2.76e-14	g9617.t1
g9952.t1	355.305	-1.76747	0.22094	-7.99978	1.25e-15	2.94e-14	g9952.t1
g20162.t1	1039.39	-1.2973	0.162172	-7.99954	1.25e-15	2.94e-14	g20162.t1
g43239.t1	4992.31	-1.29352	0.161754	-7.99685	1.28e-15	3e-14	g43239.t1
g28253.t1	193.532	-2.08207	0.260417	-7.99512	1.29e-15	3.04e-14	g28253.t1
g13111.t1	2028.32	-1.14826	0.143667	-7.99252	1.32e-15	3.1e-14	g13111.t1
g31371.t1	1585.13	1.07571	0.134764	7.98223	1.44e-15	3.36e-14	g31371.t1
g44478.t1	691.607	1.02582	0.128624	7.97531	1.52e-15	3.56e-14	g44478.t1
g21238.t1	777.919	-1.02527	0.12856	-7.975	1.52e-15	3.56e-14	g21238.t1
g11768.t1	203.822	1.76912	0.221915	7.9721	1.56e-15	3.64e-14	g11768.t1
g9721.t1	712.882	-1.17549	0.147467	-7.97121	1.57e-15	3.66e-14	g9721.t1
g27684.t1	506.403	1.80063	0.225931	7.96982	1.59e-15	3.7e-14	g27684.t1
g42933.t1	1129.39	-1.51581	0.190262	-7.96699	1.63e-15	3.78e-14	g42933.t1
g15535.t1	189.575	-1.80528	0.226664	-7.96457	1.66e-15	3.85e-14	g15535.t1
g14737.t1	1287.03	-1.06138	0.133319	-7.96125	1.7e-15	3.95e-14	g14737.t1
g9009.t1	495.587	-1.17575	0.147689	-7.96097	1.71e-15	3.96e-14	g9009.t1
g4775.t1	358.179	-1.74014	0.2186	-7.96038	1.72e-15	3.98e-14	g4775.t1
g14051.t1	1949.55	1.15117	0.144684	7.95641	1.77e-15	4.1e-14	g14051.t1
g38369.t1	714	-1.78299	0.224178	-7.95346	1.81e-15	4.19e-14	g38369.t1
g6159.t1	839.203	-1.70796	0.214831	-7.95029	1.86e-15	4.3e-14	g6159.t1
g30780.t1	395.776	-1.41178	0.177646	-7.94715	1.91e-15	4.4e-14	g30780.t1
g30098.t1	2601.3	-1.30435	0.164217	-7.9428	1.98e-15	4.55e-14	g30098.t1
g43524.t1	971.697	-1.16084	0.14619	-7.9406	2.01e-15	4.63e-14	g43524.t1
g24349.t1	1436.67	-1.387	0.174716	-7.9386	2.04e-15	4.7e-14	g24349.t1
g21266.t1	634.378	-1.69909	0.214175	-7.93319	2.14e-15	4.9e-14	g21266.t1
g11932.t2	722.26	-1.14794	0.144724	-7.93194	2.16e-15	4.95e-14	g11932.t2
g20378.t1	525.811	-1.54497	0.194817	-7.93038	2.18e-15	5.01e-14	g20378.t1
g12087.t1	381.236	-2.15907	0.272606	-7.92012	2.37e-15	5.43e-14	g12087.t1
g25604.t1	99.0593	2.29947	0.290412	7.91795	2.41e-15	5.52e-14	g25604.t1
g18901.t1	457.892	1.18994	0.150308	7.91666	2.44e-15	5.57e-14	g18901.t1
g40184.t1	595.693	-1.65952	0.209622	-7.91673	2.44e-15	5.57e-14	g40184.t1
g14053.t1	369.48	1.63019	0.206013	7.91304	2.51e-15	5.73e-14	g14053.t1
g35860.t1	3697.28	-1.13889	0.14399	-7.90949	2.58e-15	5.89e-14	g35860.t1
g16545.t1	790.932	-2.87089	0.362976	-7.90931	2.59e-15	5.9e-14	g16545.t1
g20733.t1	384.593	-2.06982	0.261706	-7.90895	2.6e-15	5.91e-14	g20733.t1
g29665.t1	378.709	-1.22152	0.154452	-7.90871	2.6e-15	5.92e-14	g29665.t1
g25772.t1	2206.25	-1.03039	0.130311	-7.90716	2.63e-15	5.99e-14	g25772.t1
g7673.t1	591.525	-1.21918	0.154224	-7.90524	2.67e-15	6.07e-14	g7673.t1
g7846.t1	808.919	1.06226	0.134373	7.90532	2.67e-15	6.07e-14	g7846.t1
g17820.t1	1558.56	-1.13641	0.143756	-7.90511	2.68e-15	6.07e-14	g17820.t1
g39031.t1	2239	-1.59406	0.201661	-7.90466	2.69e-15	6.09e-14	g39031.t1
g30603.t1	312.648	1.28576	0.162695	7.90288	2.73e-15	6.17e-14	g30603.t1
g42035.t1	786.384	-1.64779	0.208514	-7.90255	2.73e-15	6.18e-14	g42035.t1
g21732.t1	1060.33	-3.19016	0.404019	-7.89605	2.88e-15	6.5e-14	g21732.t1
g41991.t1	518.36	-1.30509	0.16538	-7.89146	2.99e-15	6.74e-14	g41991.t1
g26551.t1	799.171	-1.48618	0.18848	-7.88507	3.14e-15	7.08e-14	g26551.t1
g19775.t1	1359.61	1.13862	0.144456	7.88215	3.22e-15	7.24e-14	g19775.t1
g17105.t1	394.858	-1.22331	0.155465	-7.86871	3.58e-15	8.05e-14	g17105.t1
g27251.t1	7832.08	-1.84922	0.235126	-7.8648	3.7e-15	8.29e-14	g27251.t1
g14747.t1	1359.85	-1.55247	0.197779	-7.8495	4.18e-15	9.35e-14	g14747.t1
g26234.t1	267.213	-1.3168	0.167782	-7.84832	4.22e-15	9.44e-14	g26234.t1
g29716.t2	713.866	-1.32014	0.168374	-7.84048	4.49e-15	1e-13	g29716.t2
g23425.t1	890.977	1.05251	0.134249	7.83996	4.51e-15	1.01e-13	g23425.t1
g22706.t1	275.989	-1.89504	0.241736	-7.83929	4.53e-15	1.01e-13	g22706.t1
g25742.t1	613.153	1.12784	0.143913	7.83692	4.62e-15	1.03e-13	g25742.t1
g21437.t1	1263.93	-1.65447	0.21115	-7.83552	4.67e-15	1.04e-13	g21437.t1
g45582.t1	966.941	-1.40499	0.179323	-7.83498	4.69e-15	1.04e-13	g45582.t1
g43120.t1	7758.85	-1.66939	0.213148	-7.83206	4.8e-15	1.07e-13	g43120.t1
g30216.t1	292.721	-1.39354	0.177947	-7.83122	4.83e-15	1.07e-13	g30216.t1
g42177.t1	234.885	-1.66712	0.212936	-7.8292	4.91e-15	1.09e-13	g42177.t1
g6528.t1	471.837	-1.80131	0.230124	-7.82756	4.97e-15	1.1e-13	g6528.t1
g26930.t1	347.452	-2.32094	0.296658	-7.82362	5.13e-15	1.14e-13	g26930.t1
g14126.t1	519.948	-1.98906	0.254338	-7.82054	5.26e-15	1.16e-13	g14126.t1
g16306.t1	240.619	1.57317	0.201203	7.8188	5.33e-15	1.18e-13	g16306.t1
g23137.t1	220.667	-1.4341	0.183446	-7.81754	5.39e-15	1.19e-13	g23137.t1
g27.t1	953.945	-1.47034	0.188102	-7.81671	5.42e-15	1.2e-13	g27.t1
g419.t1	1138.51	-1.02156	0.130786	-7.81092	5.68e-15	1.25e-13	g419.t1
g22324.t1	335.736	-2.26719	0.290527	-7.80373	6.01e-15	1.32e-13	g22324.t1
g41014.t1	294.677	-1.51094	0.193616	-7.80379	6.01e-15	1.32e-13	g41014.t1
g14520.t1	475.597	-1.16607	0.149466	-7.80155	6.12e-15	1.35e-13	g14520.t1
g42212.t1	1030.25	-1.40815	0.180538	-7.79973	6.2e-15	1.36e-13	g42212.t1
g31504.t1	416.974	-1.09052	0.139871	-7.79665	6.36e-15	1.4e-13	g31504.t1
g26564.t1	1207.58	-1.10018	0.141256	-7.78855	6.78e-15	1.49e-13	g26564.t1
g28385.t1	2793.47	1.71295	0.220003	7.78602	6.92e-15	1.52e-13	g28385.t1
g30333.t1	8011.24	-1.12113	0.144014	-7.78486	6.98e-15	1.53e-13	g30333.t1
g33252.t1	95.6037	-2.36735	0.304177	-7.78279	7.09e-15	1.55e-13	g33252.t1
g2944.t1	14636.1	1.51063	0.194143	7.78103	7.19e-15	1.57e-13	g2944.t1
g41930.t1	252.705	-1.84175	0.236709	-7.78067	7.21e-15	1.57e-13	g41930.t1
g33888.t1	763.213	-1.23579	0.158854	-7.77944	7.28e-15	1.59e-13	g33888.t1
g13759.t1	978.259	-1.57474	0.202743	-7.7672	8.02e-15	1.75e-13	g13759.t1
g21036.t1	8708.99	-1.72659	0.222404	-7.7633	8.27e-15	1.79e-13	g21036.t1
g5723.t1	174.888	-1.82737	0.235389	-7.76321	8.28e-15	1.79e-13	g5723.t1
g688.t1	338.133	-1.17177	0.151012	-7.75947	8.53e-15	1.85e-13	g688.t1
g11855.t1	2349.23	-1.13793	0.146669	-7.75851	8.59e-15	1.86e-13	g11855.t1
g11144.t1	836.205	-1.27871	0.164825	-7.75799	8.63e-15	1.86e-13	g11144.t1
g27192.t1	261.831	-2.91742	0.376052	-7.75802	8.63e-15	1.86e-13	g27192.t1
g29653.t1	487.108	-1.02171	0.131811	-7.75135	9.09e-15	1.96e-13	g29653.t1
g27790.t1	391.082	1.11594	0.144005	7.74931	9.24e-15	1.99e-13	g27790.t1
g19153.t2	556.424	1.22591	0.15822	7.74813	9.33e-15	2.01e-13	g19153.t2
g7074.t2	71.9109	-9.87482	1.27457	-7.74755	9.37e-15	2.02e-13	g7074.t2
g14967.t1	135.067	2.6087	0.336836	7.74471	9.58e-15	2.06e-13	g14967.t1
g17492.t1	800.956	-1.52741	0.19722	-7.7447	9.58e-15	2.06e-13	g17492.t1
g9136.t1	592.645	-1.13363	0.146397	-7.74354	9.67e-15	2.08e-13	g9136.t1
g18548.t1	446.722	-1.46311	0.189007	-7.74104	9.86e-15	2.12e-13	g18548.t1
g11451.t1	526.565	-1.01712	0.131395	-7.74094	9.87e-15	2.12e-13	g11451.t1
g29283.t1	608.646	-1.73472	0.224217	-7.7368	1.02e-14	2.19e-13	g29283.t1
g20294.t1	10671.3	-1.26966	0.164143	-7.73508	1.03e-14	2.22e-13	g20294.t1
g10256.t1	899.635	1.19514	0.154535	7.7338	1.04e-14	2.24e-13	g10256.t1
g31243.t1	154.009	-2.3436	0.303063	-7.73304	1.05e-14	2.25e-13	g31243.t1
g41080.t1	524.92	-1.69344	0.219007	-7.73235	1.06e-14	2.26e-13	g41080.t1
g31851.t1	1342.42	-1.12805	0.145915	-7.73085	1.07e-14	2.28e-13	g31851.t1
g13798.t1	6751.5	-1.30425	0.168776	-7.72768	1.1e-14	2.34e-13	g13798.t1
g10720.t1	476.091	1.91758	0.248208	7.7257	1.11e-14	2.37e-13	g10720.t1
g36204.t1	1225.56	-1.74647	0.226292	-7.71781	1.18e-14	2.52e-13	g36204.t1
g9237.t1	2251.39	-1.8051	0.233916	-7.71686	1.19e-14	2.53e-13	g9237.t1
g20223.t1	39967.6	-1.96642	0.255096	-7.70853	1.27e-14	2.7e-13	g20223.t1
g42380.t1	421.335	-2.02404	0.262576	-7.70839	1.27e-14	2.7e-13	g42380.t1
g8079.t2	32217.6	1.58082	0.205107	7.70728	1.29e-14	2.72e-13	g8079.t2
g38656.t1	1241.44	-1.01671	0.131972	-7.70397	1.32e-14	2.79e-13	g38656.t1
g32344.t1	619.954	-1.12306	0.145857	-7.69973	1.36e-14	2.88e-13	g32344.t1
g17145.t1	76.883	9.44966	1.22744	7.69868	1.37e-14	2.9e-13	g17145.t1
g20155.t1	3029.95	-1.05226	0.136709	-7.69707	1.39e-14	2.94e-13	g20155.t1
g44163.t1	420.631	-1.55248	0.201787	-7.69365	1.43e-14	3.01e-13	g44163.t1
g35712.t1	108.876	2.69324	0.350205	7.69047	1.47e-14	3.08e-13	g35712.t1
g1877.t1	259.776	-2.55724	0.332541	-7.68999	1.47e-14	3.09e-13	g1877.t1
g32911.t1	537.867	1.2856	0.167234	7.68747	1.5e-14	3.15e-13	g32911.t1
g39200.t1	3829.42	1.2542	0.163171	7.68647	1.51e-14	3.17e-13	g39200.t1
g39892.t1	299.303	1.24299	0.161793	7.68259	1.56e-14	3.27e-13	g39892.t1
g19359.t1	161.202	-1.8471	0.240433	-7.68238	1.56e-14	3.27e-13	g19359.t1
g32578.t2	5861.85	-1.52224	0.198182	-7.68102	1.58e-14	3.3e-13	g32578.t2
g28653.t1	2732.11	-1.16424	0.151666	-7.67633	1.64e-14	3.42e-13	g28653.t1
g12405.t1	719.233	-1.73629	0.2262	-7.67589	1.64e-14	3.43e-13	g12405.t1
g14601.t1	567.336	-1.36262	0.177657	-7.66999	1.72e-14	3.59e-13	g14601.t1
g41584.t1	1194.78	-1.0727	0.139862	-7.66967	1.72e-14	3.59e-13	g41584.t1
g15761.t1	1437.6	-1.50046	0.195642	-7.66939	1.73e-14	3.6e-13	g15761.t1
g26322.t1	571.764	1.10874	0.144707	7.66197	1.83e-14	3.8e-13	g26322.t1
g34396.t1	238.178	-1.39285	0.18181	-7.66099	1.85e-14	3.83e-13	g34396.t1
g6075.t1	72.3995	9.36286	1.22242	7.65927	1.87e-14	3.88e-13	g6075.t1
g27431.t1	210.686	-1.59004	0.207626	-7.65823	1.89e-14	3.9e-13	g27431.t1
g11043.t1	1435.15	-2.06462	0.269659	-7.6564	1.91e-14	3.95e-13	g11043.t1
g27617.t1	209.946	-1.53372	0.200385	-7.65388	1.95e-14	4.03e-13	g27617.t1
g3922.t1	702.03	-1.13303	0.148176	-7.64651	2.07e-14	4.25e-13	g3922.t1
g39128.t1	252.825	-1.88862	0.24706	-7.64437	2.1e-14	4.32e-13	g39128.t1
g42785.t1	1358.32	-1.01988	0.133426	-7.64373	2.11e-14	4.34e-13	g42785.t1
g4558.t1	129.098	-2.12964	0.278637	-7.64307	2.12e-14	4.36e-13	g4558.t1
g10938.t1	127.402	2.86388	0.374699	7.64314	2.12e-14	4.36e-13	g10938.t1
g8617.t1	551.267	-1.06059	0.138965	-7.63207	2.31e-14	4.74e-13	g8617.t1
g25319.t1	410.776	-1.468	0.192373	-7.631	2.33e-14	4.78e-13	g25319.t1
g11984.t1	1232.2	-1.71329	0.224523	-7.63082	2.33e-14	4.78e-13	g11984.t1
g41969.t1	2414.33	-1.09293	0.143366	-7.62335	2.47e-14	5.06e-13	g41969.t1
g10199.t1	22111.7	1.17061	0.153602	7.62104	2.52e-14	5.15e-13	g10199.t1
g7362.t1	11687.5	-1.11912	0.146962	-7.61504	2.64e-14	5.39e-13	g7362.t1
g30971.t1	596.192	-1.00092	0.131453	-7.61429	2.65e-14	5.42e-13	g30971.t1
g43667.t1	472.301	1.891	0.248358	7.61401	2.66e-14	5.42e-13	g43667.t1
g9608.t1	4157.06	1.66194	0.2191	7.58532	3.32e-14	6.73e-13	g9608.t1
g30255.t1	333.006	1.28498	0.169454	7.58303	3.38e-14	6.85e-13	g30255.t1
g37845.t1	2238.82	-1.06143	0.140138	-7.57419	3.61e-14	7.33e-13	g37845.t1
g3400.t1	880.306	-1.54772	0.204351	-7.57384	3.62e-14	7.34e-13	g3400.t1
g36465.t1	2879.75	1.5394	0.20326	7.57355	3.63e-14	7.35e-13	g36465.t1
g19861.t1	295.9	1.50182	0.198305	7.57329	3.64e-14	7.36e-13	g19861.t1
g30540.t1	1275.27	-1.65611	0.218733	-7.57138	3.69e-14	7.47e-13	g30540.t1
g24881.t1	9767.93	-1.56372	0.206617	-7.56823	3.78e-14	7.64e-13	g24881.t1
g19916.t1	357.607	-1.94101	0.256623	-7.56367	3.92e-14	7.91e-13	g19916.t1
g3097.t1	564.797	-1.55461	0.20574	-7.55619	4.15e-14	8.38e-13	g3097.t1
g24364.t1	2882.93	1.35473	0.179341	7.55392	4.22e-14	8.52e-13	g24364.t1
g19095.t1	6453.45	-1.10805	0.14683	-7.54647	4.47e-14	8.99e-13	g19095.t1
g39939.t1	509.16	1.1421	0.151488	7.53922	4.73e-14	9.48e-13	g39939.t1
g31970.t1	157.526	-2.32541	0.308449	-7.53905	4.73e-14	9.49e-13	g31970.t1
g42608.t1	9023.86	-1.61597	0.214462	-7.53498	4.88e-14	9.78e-13	g42608.t1
g27389.t1	774.12	-2.92956	0.388873	-7.53345	4.94e-14	9.89e-13	g27389.t1
g40499.t1	466.594	-1.04623	0.138948	-7.52966	5.09e-14	1.02e-12	g40499.t1
g30546.t1	5094.53	-1.74169	0.231386	-7.52719	5.18e-14	1.03e-12	g30546.t1
g45399.t1	510.635	-1.08152	0.143743	-7.52398	5.31e-14	1.06e-12	g45399.t1
g20137.t1	349.059	-1.11347	0.148044	-7.52121	5.43e-14	1.08e-12	g20137.t1
g12777.t1	414.134	1.28409	0.170734	7.52098	5.44e-14	1.08e-12	g12777.t1
g35800.t1	56.4282	-9.52881	1.26738	-7.51849	5.54e-14	1.1e-12	g35800.t1
g23341.t1	418.225	-1.51961	0.202132	-7.51787	5.57e-14	1.11e-12	g23341.t1
g26521.t1	1174.9	-1.82979	0.243402	-7.51758	5.58e-14	1.11e-12	g26521.t1
g20158.t1	3571.9	-1.06259	0.141376	-7.51608	5.64e-14	1.12e-12	g20158.t1
g7120.t2	1141.62	-1.20848	0.160799	-7.51548	5.67e-14	1.12e-12	g7120.t2
g27202.t1	234.842	1.71743	0.228589	7.5132	5.77e-14	1.14e-12	g27202.t1
g35747.t1	2617.35	-1.23884	0.165037	-7.50643	6.08e-14	1.2e-12	g35747.t1
g27268.t1	764.677	1.41177	0.188265	7.49885	6.44e-14	1.27e-12	g27268.t1
g40433.t1	82.4027	-2.81694	0.37573	-7.49725	6.52e-14	1.29e-12	g40433.t1
g22149.t1	3615.04	-1.52469	0.203443	-7.49444	6.66e-14	1.31e-12	g22149.t1
g14049.t1	1259.67	-1.90426	0.25411	-7.49381	6.69e-14	1.32e-12	g14049.t1
g42650.t1	599.694	-1.41724	0.189123	-7.49374	6.69e-14	1.32e-12	g42650.t1
g19153.t1	428.953	1.70086	0.227014	7.49232	6.77e-14	1.33e-12	g19153.t1
g989.t1	482.727	-1.88373	0.251451	-7.49145	6.81e-14	1.34e-12	g989.t1
g24287.t1	622.498	-1.7175	0.229323	-7.48943	6.92e-14	1.36e-12	g24287.t1
g32934.t1	878.052	1.03871	0.138741	7.48669	7.06e-14	1.39e-12	g32934.t1
g4559.t1	301.048	-1.89268	0.252812	-7.48652	7.07e-14	1.39e-12	g4559.t1
g31919.t1	294.305	-2.26472	0.302603	-7.48414	7.2e-14	1.41e-12	g31919.t1
g34577.t1	1200.64	-1.45114	0.193947	-7.48212	7.31e-14	1.43e-12	g34577.t1
g14992.t1	420.867	1.52728	0.20421	7.47895	7.49e-14	1.47e-12	g14992.t1
g13048.t1	140.125	-2.57675	0.344568	-7.47819	7.54e-14	1.47e-12	g13048.t1
g35433.t1	462.517	-1.25587	0.167974	-7.47655	7.63e-14	1.49e-12	g35433.t1
g16595.t1	507.289	-1.24995	0.167188	-7.47629	7.65e-14	1.49e-12	g16595.t1
g42073.t1	286.146	-1.27558	0.170629	-7.47574	7.68e-14	1.5e-12	g42073.t1
g2532.t1	490.154	-1.27215	0.170211	-7.47399	7.78e-14	1.52e-12	g2532.t1
g30746.t1	243.785	-1.34366	0.17981	-7.47267	7.86e-14	1.53e-12	g30746.t1
g8839.t1	372.432	-2.13178	0.285339	-7.47107	7.95e-14	1.55e-12	g8839.t1
g37556.t1	92.9253	3.11186	0.416559	7.47039	8e-14	1.55e-12	g37556.t1
g45569.t1	609.929	-1.0128	0.135841	-7.45577	8.93e-14	1.73e-12	g45569.t1
g36547.t1	692.484	1.34022	0.17978	7.45477	9e-14	1.74e-12	g36547.t1
g38328.t1	219.165	-1.27073	0.170537	-7.45132	9.24e-14	1.79e-12	g38328.t1
g21133.t1	83.8664	-2.59289	0.348016	-7.45049	9.3e-14	1.8e-12	g21133.t1
g15253.t1	5682.42	-1.7267	0.2319	-7.44589	9.63e-14	1.86e-12	g15253.t1
g6232.t1	1078.58	-1.54802	0.207942	-7.44448	9.73e-14	1.88e-12	g6232.t1
g9810.t1	715.129	1.4579	0.195863	7.44347	9.81e-14	1.89e-12	g9810.t1
g32730.t1	680.51	-1.67333	0.224832	-7.44258	9.87e-14	1.9e-12	g32730.t1
g20926.t2	1239.26	-1.4521	0.195191	-7.43938	1.01e-13	1.95e-12	g20926.t2
g10738.t1	495.701	-1.41604	0.190351	-7.4391	1.01e-13	1.95e-12	g10738.t1
g37719.t1	6907.92	-1.43752	0.193366	-7.4342	1.05e-13	2.02e-12	g37719.t1
g32484.t1	2095.76	1.22812	0.165223	7.4331	1.06e-13	2.03e-12	g32484.t1
g32925.t1	1631.75	-1.77732	0.239106	-7.43316	1.06e-13	2.03e-12	g32925.t1
g29447.t1	223.751	1.37668	0.185236	7.43202	1.07e-13	2.05e-12	g29447.t1
g43784.t1	1385.62	1.28088	0.172397	7.4298	1.09e-13	2.08e-12	g43784.t1
g22872.t1	623.056	-2.37203	0.319408	-7.42634	1.12e-13	2.14e-12	g22872.t1
g31665.t1	414.294	-1.71924	0.231586	-7.42374	1.14e-13	2.17e-12	g31665.t1
g4068.t1	167.086	-1.8842	0.253936	-7.41997	1.17e-13	2.23e-12	g4068.t1
g25677.t1	663.717	-1.17119	0.157898	-7.41738	1.19e-13	2.28e-12	g25677.t1
g22303.t1	1017.93	-1.0226	0.13788	-7.41662	1.2e-13	2.29e-12	g22303.t1
g16200.t1	156.667	1.78496	0.241286	7.39767	1.39e-13	2.64e-12	g16200.t1
g5233.t1	147.946	-1.78196	0.240976	-7.39476	1.42e-13	2.69e-12	g5233.t1
g11058.t1	145.835	-1.5279	0.206739	-7.39045	1.46e-13	2.78e-12	g11058.t1
g28731.t1	164.687	1.71872	0.23273	7.38502	1.52e-13	2.89e-12	g28731.t1
g40534.t1	285.509	-2.68945	0.364225	-7.38404	1.54e-13	2.91e-12	g40534.t1
g38782.t1	235.752	-2.86682	0.388307	-7.38288	1.55e-13	2.93e-12	g38782.t1
g31907.t1	879.813	-1.15824	0.156929	-7.38072	1.57e-13	2.98e-12	g31907.t1
g19030.t1	831.379	1.41274	0.191477	7.37808	1.61e-13	3.04e-12	g19030.t1
g45252.t1	697.866	-1.1229	0.152196	-7.37803	1.61e-13	3.04e-12	g45252.t1
g9615.t1	432.096	-1.28639	0.174407	-7.37578	1.63e-13	3.09e-12	g9615.t1
g6763.t1	195.492	-1.71927	0.233164	-7.37364	1.66e-13	3.13e-12	g6763.t1
g29611.t1	253.37	-1.93797	0.262851	-7.37288	1.67e-13	3.15e-12	g29611.t1
g16780.t1	1532.15	-1.35375	0.18376	-7.36698	1.75e-13	3.29e-12	g16780.t1
g17739.t1	746.619	-1.05666	0.143444	-7.36636	1.75e-13	3.3e-12	g17739.t1
g18678.t1	2773.03	-1.18783	0.161276	-7.36522	1.77e-13	3.33e-12	g18678.t1
g3605.t1	685.353	-1.42473	0.193558	-7.36076	1.83e-13	3.44e-12	g3605.t1
g11256.t1	1249.62	-1.95107	0.265065	-7.36072	1.83e-13	3.44e-12	g11256.t1
g45486.t1	261.788	-1.82435	0.247861	-7.36035	1.83e-13	3.44e-12	g45486.t1
g654.t1	569.015	-2.43469	0.330929	-7.35716	1.88e-13	3.52e-12	g654.t1
g38307.t1	410.715	1.09252	0.14864	7.35005	1.98e-13	3.71e-12	g38307.t1
g10874.t1	470.854	-1.02077	0.138952	-7.34621	2.04e-13	3.81e-12	g10874.t1
g17708.t1	299.653	-2.1951	0.298845	-7.3453	2.05e-13	3.84e-12	g17708.t1
g6318.t1	596.3	1.12375	0.153067	7.34161	2.11e-13	3.94e-12	g6318.t1
g38137.t1	493.918	-1.2891	0.175621	-7.34025	2.13e-13	3.98e-12	g38137.t1
g14744.t1	1155.71	-1.46612	0.199811	-7.33752	2.18e-13	4.06e-12	g14744.t1
g19800.t1	381.338	-1.80534	0.246045	-7.33744	2.18e-13	4.06e-12	g19800.t1
g34557.t2	86.7695	9.624	1.31206	7.33502	2.22e-13	4.13e-12	g34557.t2
g10293.t1	1398.36	1.15459	0.157461	7.33254	2.26e-13	4.2e-12	g10293.t1
g14484.t1	540.877	-1.22087	0.166568	-7.32958	2.31e-13	4.29e-12	g14484.t1
g42235.t1	204.802	-2.35017	0.320721	-7.32777	2.34e-13	4.35e-12	g42235.t1
g19324.t1	590.967	-1.86186	0.254116	-7.32681	2.36e-13	4.38e-12	g19324.t1
g8602.t1	742.067	-1.69655	0.23157	-7.3263	2.37e-13	4.39e-12	g8602.t1
g1197.t1	1139.7	-1.90963	0.260666	-7.32596	2.37e-13	4.4e-12	g1197.t1
g19090.t1	389.978	-1.48294	0.20249	-7.32352	2.42e-13	4.48e-12	g19090.t1
g15227.t1	117.13	-2.90064	0.396137	-7.32232	2.44e-13	4.51e-12	g15227.t1
g45236.t1	7821.29	-1.00807	0.1377	-7.32076	2.47e-13	4.56e-12	g45236.t1
g42466.t1	441.829	1.1599	0.158474	7.31922	2.49e-13	4.61e-12	g42466.t1
g38191.t1	382.07	-1.14606	0.156643	-7.31641	2.55e-13	4.71e-12	g38191.t1
g5878.t1	182.158	-1.60218	0.219186	-7.30969	2.68e-13	4.93e-12	g5878.t1
g24361.t1	779.605	1.20105	0.164341	7.30826	2.71e-13	4.97e-12	g24361.t1
g27226.t1	688.48	-1.10185	0.150782	-7.30755	2.72e-13	5e-12	g27226.t1
g6904.t1	985.29	-1.42749	0.195395	-7.30565	2.76e-13	5.06e-12	g6904.t1
g12117.t1	1174.92	-1.51548	0.207442	-7.30554	2.76e-13	5.06e-12	g12117.t1
g24069.t1	263.65	-2.16512	0.296421	-7.30421	2.79e-13	5.11e-12	g24069.t1
g2614.t1	292.116	1.50165	0.205956	7.29113	3.07e-13	5.62e-12	g2614.t1
g38072.t1	378.761	-1.32609	0.181942	-7.28855	3.13e-13	5.72e-12	g38072.t1
g22038.t1	462.016	-2.2819	0.313131	-7.28736	3.16e-13	5.77e-12	g22038.t1
g8518.t1	795.413	-1.04641	0.143677	-7.2831	3.26e-13	5.95e-12	g8518.t1
g10445.t1	213.329	2.80926	0.385735	7.28287	3.27e-13	5.95e-12	g10445.t1
g23420.t1	1479.33	-1.08862	0.149547	-7.27946	3.35e-13	6.1e-12	g23420.t1
g22768.t1	546.304	1.39226	0.19129	7.27831	3.38e-13	6.14e-12	g22768.t1
g26998.t1	1879.69	-1.22673	0.168545	-7.27833	3.38e-13	6.14e-12	g26998.t1
g44566.t1	212.846	-2.46291	0.338431	-7.27744	3.4e-13	6.18e-12	g44566.t1
g27493.t1	203.497	-1.84096	0.252999	-7.27657	3.42e-13	6.22e-12	g27493.t1
g38487.t1	551.201	1.20363	0.165461	7.27441	3.48e-13	6.31e-12	g38487.t1
g8261.t1	555.393	-1.01333	0.139413	-7.26856	3.63e-13	6.58e-12	g8261.t1
g19829.t1	750.535	-1.17879	0.162316	-7.26235	3.8e-13	6.88e-12	g19829.t1
g16797.t1	170.195	2.21574	0.305113	7.26203	3.81e-13	6.89e-12	g16797.t1
g9993.t1	245.027	-2.6123	0.359735	-7.26172	3.82e-13	6.91e-12	g9993.t1
g37946.t2	3457.46	1.90228	0.262101	7.25782	3.93e-13	7.1e-12	g37946.t2
g16333.t1	245.665	-1.95379	0.269321	-7.2545	4.03e-13	7.27e-12	g16333.t1
g17690.t1	1096.49	1.20773	0.166554	7.25131	4.13e-13	7.44e-12	g17690.t1
g43490.t1	1357.14	-1.77525	0.245143	-7.2417	4.43e-13	7.97e-12	g43490.t1
g22985.t1	4130.39	-1.25227	0.172956	-7.24036	4.47e-13	8.04e-12	g22985.t1
g28421.t1	721.075	-1.35273	0.186905	-7.23754	4.57e-13	8.21e-12	g28421.t1
g30961.t1	1310.59	-1.00576	0.138971	-7.23718	4.58e-13	8.22e-12	g30961.t1
g12365.t1	144.022	-1.62843	0.225106	-7.23406	4.69e-13	8.41e-12	g12365.t1
g39411.t1	330.65	-1.8368	0.253941	-7.2332	4.72e-13	8.46e-12	g39411.t1
g38471.t1	1951.65	-1.54374	0.213447	-7.23245	4.74e-13	8.49e-12	g38471.t1
g37304.t1	3162.73	-1.5668	0.216661	-7.23159	4.77e-13	8.54e-12	g37304.t1
g33053.t1	230.38	-1.84253	0.254849	-7.22987	4.83e-13	8.64e-12	g33053.t1
g5568.t1	55.2334	-9.49794	1.31392	-7.22869	4.88e-13	8.71e-12	g5568.t1
g43615.t1	510.075	-1.93812	0.26821	-7.22614	4.97e-13	8.87e-12	g43615.t1
g10739.t1	257.331	1.36692	0.18917	7.22589	4.98e-13	8.88e-12	g10739.t1
g41760.t1	422.221	2.13634	0.295906	7.21967	5.21e-13	9.27e-12	g41760.t1
g44564.t1	819.723	-1.29003	0.17877	-7.21611	5.35e-13	9.51e-12	g44564.t1
g1092.t1	373.965	-1.64717	0.228349	-7.21338	5.46e-13	9.69e-12	g1092.t1
g29973.t1	701.152	1.02678	0.142366	7.21226	5.5e-13	9.77e-12	g29973.t1
g33169.t1	612.916	-1.05467	0.146346	-7.20668	5.73e-13	1.01e-11	g33169.t1
g28101.t1	569.845	-1.38166	0.191758	-7.20524	5.79e-13	1.02e-11	g28101.t1
g26269.t1	319.233	-1.6192	0.22479	-7.20319	5.88e-13	1.04e-11	g26269.t1
g13794.t1	459.427	-1.52075	0.211235	-7.19932	6.05e-13	1.07e-11	g13794.t1
g36249.t1	119.062	-1.93183	0.268361	-7.19862	6.08e-13	1.07e-11	g36249.t1
g35751.t1	733.119	1.46031	0.202871	7.19821	6.1e-13	1.08e-11	g35751.t1
g30449.t1	365.378	1.16302	0.161624	7.19584	6.21e-13	1.09e-11	g30449.t1
g22680.t1	1360.08	1.34536	0.187055	7.19231	6.37e-13	1.12e-11	g22680.t1
g17261.t1	703.075	-1.02764	0.142967	-7.18793	6.58e-13	1.15e-11	g17261.t1
g15266.t1	3854.48	1.43444	0.199586	7.1871	6.62e-13	1.16e-11	g15266.t1
g24044.t1	220.177	-1.36507	0.18998	-7.18531	6.71e-13	1.17e-11	g24044.t1
g12750.t1	261.472	-1.757	0.24466	-7.18139	6.9e-13	1.21e-11	g12750.t1
g13941.t1	2779.52	1.13844	0.158606	7.17777	7.09e-13	1.24e-11	g13941.t1
g1307.t1	1084.08	-1.49116	0.207751	-7.17763	7.09e-13	1.24e-11	g1307.t1
g26060.t1	1304.12	1.21844	0.169842	7.17395	7.29e-13	1.27e-11	g26060.t1
g7736.t1	10468.2	-1.29861	0.181093	-7.17092	7.45e-13	1.3e-11	g7736.t1
g18542.t1	461.042	-1.1253	0.156942	-7.17015	7.49e-13	1.3e-11	g18542.t1
g9570.t1	527.462	-1.66193	0.231848	-7.16821	7.6e-13	1.32e-11	g9570.t1
g29061.t1	153.632	-1.66717	0.233059	-7.15342	8.46e-13	1.47e-11	g29061.t1
g27290.t1	125.35	-2.16036	0.302018	-7.15308	8.49e-13	1.47e-11	g27290.t1
g741.t1	709.025	-1.25657	0.175778	-7.14863	8.76e-13	1.52e-11	g741.t1
g16747.t2	184.307	1.80731	0.252999	7.14355	9.1e-13	1.57e-11	g16747.t2
g17947.t1	432.638	2.24996	0.315004	7.14264	9.16e-13	1.58e-11	g17947.t1
g10979.t1	292.078	-2.83463	0.396984	-7.1404	9.31e-13	1.61e-11	g10979.t1
g45290.t1	639.214	-1.23428	0.172881	-7.13947	9.37e-13	1.62e-11	g45290.t1
g16084.t1	1459.82	1.4756	0.206789	7.13578	9.62e-13	1.66e-11	g16084.t1
g15475.t1	2149.84	-1.18539	0.166132	-7.13522	9.66e-13	1.66e-11	g15475.t1
g22296.t1	228.72	-1.53162	0.214835	-7.1293	1.01e-12	1.73e-11	g22296.t1
g29958.t1	193.488	-1.67748	0.235334	-7.12806	1.02e-12	1.75e-11	g29958.t1
g5065.t1	129.514	1.76832	0.248082	7.12795	1.02e-12	1.75e-11	g5065.t1
g235.t1	55.1329	8.96991	1.25939	7.12244	1.06e-12	1.82e-11	g235.t1
g12477.t1	434.405	1.33087	0.187091	7.1135	1.13e-12	1.94e-11	g12477.t1
g749.t1	935.461	1.09527	0.154074	7.10873	1.17e-12	2e-11	g749.t1
g40374.t1	536.104	1.4006	0.197028	7.10866	1.17e-12	2e-11	g40374.t1
g46169.t1	53.1918	8.91799	1.25513	7.10522	1.2e-12	2.05e-11	g46169.t1
g17406.t1	349.771	-2.03998	0.287361	-7.099	1.26e-12	2.14e-11	g17406.t1
g21725.t3	2551.71	-1.12085	0.157912	-7.09794	1.27e-12	2.16e-11	g21725.t3
g14694.t1	1093.3	-1.02296	0.144252	-7.09146	1.33e-12	2.26e-11	g14694.t1
g19560.t1	188.475	-3.40145	0.480041	-7.08575	1.38e-12	2.35e-11	g19560.t1
g37583.t1	2039.4	-2.55224	0.36024	-7.08483	1.39e-12	2.37e-11	g37583.t1
g28077.t1	280.34	-1.5766	0.222709	-7.0792	1.45e-12	2.46e-11	g28077.t1
g31663.t1	608.304	-1.7752	0.251065	-7.07068	1.54e-12	2.62e-11	g31663.t1
g22640.t1	311.034	-1.78274	0.25227	-7.06681	1.59e-12	2.69e-11	g22640.t1
g17003.t1	298.186	-1.0358	0.1466	-7.06549	1.6e-12	2.71e-11	g17003.t1
g15023.t1	495.279	1.19531	0.169254	7.06225	1.64e-12	2.77e-11	g15023.t1
g17759.t1	40.5925	-9.05141	1.2818	-7.06149	1.65e-12	2.79e-11	g17759.t1
g36437.t1	182.478	-1.87404	0.265563	-7.05685	1.7e-12	2.88e-11	g36437.t1
g28937.t1	2703.32	-1.61995	0.229635	-7.05445	1.73e-12	2.93e-11	g28937.t1
g33212.t1	48.1821	8.77556	1.24399	7.05434	1.73e-12	2.93e-11	g33212.t1
g19646.t1	88.9834	-2.21216	0.313682	-7.05224	1.76e-12	2.97e-11	g19646.t1
g2564.t1	657.785	-1.27486	0.180777	-7.05213	1.76e-12	2.97e-11	g2564.t1
g13871.t1	582.656	-1.01443	0.143876	-7.05074	1.78e-12	3e-11	g13871.t1
g25143.t1	1300.51	-1.00756	0.143056	-7.04315	1.88e-12	3.16e-11	g25143.t1
g25897.t1	319.968	-1.47486	0.209504	-7.03978	1.93e-12	3.23e-11	g25897.t1
g45751.t1	8046.98	1.21972	0.173259	7.03984	1.92e-12	3.23e-11	g45751.t1
g29728.t1	1838.95	-1.41108	0.200469	-7.0389	1.94e-12	3.25e-11	g29728.t1
g11759.t1	1033.11	-1.20554	0.17135	-7.03557	1.98e-12	3.33e-11	g11759.t1
g15488.t1	1331.18	-1.33067	0.189172	-7.03418	2e-12	3.36e-11	g15488.t1
g39181.t1	922.572	-1.04278	0.148306	-7.03131	2.05e-12	3.43e-11	g39181.t1
g33575.t1	339.999	-1.40643	0.20015	-7.02688	2.11e-12	3.53e-11	g33575.t1
g30036.t1	563.175	-2.29242	0.32625	-7.02656	2.12e-12	3.54e-11	g30036.t1
g12106.t1	327.916	-1.50173	0.213797	-7.0241	2.15e-12	3.6e-11	g12106.t1
g45301.t1	1031.25	1.02202	0.145527	7.0229	2.17e-12	3.62e-11	g45301.t1
g33283.t1	5172.14	-1.54255	0.21966	-7.02247	2.18e-12	3.63e-11	g33283.t1
g32889.t1	187.12	2.69981	0.384529	7.02109	2.2e-12	3.67e-11	g32889.t1
g44920.t1	442.01	-2.14561	0.305799	-7.01641	2.28e-12	3.79e-11	g44920.t1
g45600.t1	1048.51	-1.11269	0.158606	-7.01542	2.29e-12	3.81e-11	g45600.t1
g35057.t1	654.223	-1.20426	0.171716	-7.01312	2.33e-12	3.87e-11	g35057.t1
g1205.t1	293.814	1.02214	0.145992	7.00133	2.54e-12	4.2e-11	g1205.t1
g39690.t1	4235.63	1.16847	0.166891	7.0014	2.53e-12	4.2e-11	g39690.t1
g26800.t1	423.17	-1.18657	0.16953	-6.99917	2.57e-12	4.26e-11	g26800.t1
g45422.t1	13937.6	-1.49333	0.213384	-6.99834	2.59e-12	4.28e-11	g45422.t1
g28486.t1	211.766	-1.32787	0.189936	-6.99115	2.73e-12	4.5e-11	g28486.t1
g28152.t1	365.921	-1.20456	0.17235	-6.98902	2.77e-12	4.56e-11	g28152.t1
g3048.t1	543.892	-1.03487	0.148181	-6.98385	2.87e-12	4.73e-11	g3048.t1
g15051.t1	400.793	-1.05767	0.151614	-6.97605	3.04e-12	4.99e-11	g15051.t1
g23032.t2	973.574	-1.90034	0.272479	-6.97427	3.07e-12	5.05e-11	g23032.t2
g7419.t1	4529.54	-1.66791	0.239209	-6.9726	3.11e-12	5.11e-11	g7419.t1
g39541.t1	1226.98	-1.1397	0.163479	-6.97155	3.13e-12	5.14e-11	g39541.t1
g20547.t1	722.165	-1.3515	0.193984	-6.96705	3.24e-12	5.3e-11	g20547.t1
g10565.t1	531.794	1.22604	0.176104	6.96201	3.35e-12	5.49e-11	g10565.t1
g34635.t1	2598.3	-1.2812	0.184048	-6.96125	3.37e-12	5.51e-11	g34635.t1
g44387.t1	351.038	-1.0077	0.144901	-6.95437	3.54e-12	5.79e-11	g44387.t1
g25205.t1	242.04	1.13755	0.163601	6.9532	3.57e-12	5.83e-11	g25205.t1
g22723.t1	385.568	-1.46537	0.210801	-6.95143	3.62e-12	5.9e-11	g22723.t1
g39511.t1	302.271	-1.12509	0.161876	-6.95034	3.64e-12	5.94e-11	g39511.t1
g39086.t1	143.239	-1.5957	0.229663	-6.94801	3.7e-12	6.04e-11	g39086.t1
g13383.t1	3525.18	-1.02969	0.148295	-6.94352	3.82e-12	6.23e-11	g13383.t1
g45655.t1	164.749	1.87342	0.269845	6.94255	3.85e-12	6.27e-11	g45655.t1
g1345.t1	169.183	-2.62262	0.377848	-6.94092	3.9e-12	6.33e-11	g1345.t1
g44837.t1	88.5469	-5.47186	0.788438	-6.94013	3.92e-12	6.37e-11	g44837.t1
g30564.t1	513.064	-1.93718	0.279205	-6.9382	3.97e-12	6.45e-11	g30564.t1
g41293.t1	639.9	-1.3788	0.198767	-6.93674	4.01e-12	6.51e-11	g41293.t1
g42226.t1	728.546	-1.87334	0.270073	-6.93641	4.02e-12	6.53e-11	g42226.t1
g17722.t1	1113.21	-1.72098	0.248119	-6.93612	4.03e-12	6.54e-11	g17722.t1
g10375.t1	382.094	1.34842	0.194472	6.93376	4.1e-12	6.64e-11	g10375.t1
g7728.t1	560.409	1.21682	0.175558	6.93115	4.17e-12	6.75e-11	g7728.t1
g15151.t1	108.162	2.13041	0.307463	6.92898	4.24e-12	6.86e-11	g15151.t1
g34531.t1	4649.16	-1.46783	0.211872	-6.92792	4.27e-12	6.9e-11	g34531.t1
g1048.t1	2399.24	-1.02821	0.148466	-6.92552	4.34e-12	7.02e-11	g1048.t1
g13861.t1	156.155	-1.68396	0.243172	-6.92495	4.36e-12	7.04e-11	g13861.t1
g28395.t1	156.372	-2.02786	0.293216	-6.91594	4.65e-12	7.49e-11	g28395.t1
g1065.t1	47.393	8.75141	1.26546	6.91559	4.66e-12	7.51e-11	g1065.t1
g21472.t1	527.555	-1.18193	0.17094	-6.91432	4.7e-12	7.57e-11	g21472.t1
g11408.t1	1807.29	-1.35442	0.195902	-6.91379	4.72e-12	7.59e-11	g11408.t1
g22975.t1	1517.67	-1.15404	0.166928	-6.91339	4.73e-12	7.61e-11	g22975.t1
g5788.t1	824.134	-1.2244	0.177142	-6.91199	4.78e-12	7.68e-11	g5788.t1
g20448.t1	1419.37	-1.45903	0.211236	-6.90713	4.95e-12	7.94e-11	g20448.t1
g40186.t1	356.567	1.34997	0.195449	6.90703	4.95e-12	7.94e-11	g40186.t1
g5383.t1	512.155	-1.25838	0.182212	-6.90612	4.98e-12	7.99e-11	g5383.t1
g45394.t1	1801.12	-1.11611	0.161632	-6.90524	5.01e-12	8.03e-11	g45394.t1
g30024.t1	220.222	-1.64351	0.238404	-6.89383	5.43e-12	8.67e-11	g30024.t1
g6241.t1	1544.53	-1.0081	0.146282	-6.89145	5.52e-12	8.81e-11	g6241.t1
g20828.t1	306.862	-1.34424	0.195099	-6.89006	5.58e-12	8.89e-11	g20828.t1
g45900.t1	284.214	-1.23903	0.179918	-6.88664	5.71e-12	9.1e-11	g45900.t1
g6212.t1	467.5	-1.39117	0.202026	-6.88611	5.73e-12	9.13e-11	g6212.t1
g41772.t1	723.035	1.00644	0.146286	6.87991	5.99e-12	9.52e-11	g41772.t1
g24381.t1	1349.78	1.51272	0.219901	6.87909	6.02e-12	9.56e-11	g24381.t1
g44520.t1	292.655	-1.28944	0.187491	-6.87734	6.1e-12	9.66e-11	g44520.t1
g7606.t2	405.578	-1.88377	0.274169	-6.87084	6.38e-12	1.01e-10	g7606.t2
g12332.t1	192.567	-2.23945	0.326047	-6.86847	6.49e-12	1.03e-10	g12332.t1
g20407.t1	395.677	-1.13562	0.16539	-6.86629	6.59e-12	1.04e-10	g20407.t1
g30680.t1	330.31	1.06132	0.154629	6.86362	6.71e-12	1.06e-10	g30680.t1
g7872.t1	12979.8	-1.49337	0.217626	-6.8621	6.79e-12	1.07e-10	g7872.t1
g36592.t1	672.357	-1.28345	0.187089	-6.8601	6.88e-12	1.09e-10	g36592.t1
g16371.t1	141.646	-2.47881	0.36142	-6.85855	6.96e-12	1.1e-10	g16371.t1
g28871.t1	1150.46	-2.09879	0.306706	-6.84299	7.76e-12	1.22e-10	g28871.t1
g30901.t1	1374.37	-2.06704	0.302162	-6.84083	7.87e-12	1.24e-10	g30901.t1
g26817.t1	440.484	-1.96633	0.287464	-6.84026	7.91e-12	1.24e-10	g26817.t1
g129.t1	8138.91	-1.16972	0.171045	-6.83867	7.99e-12	1.25e-10	g129.t1
g27356.t1	3820	-1.2542	0.18355	-6.83299	8.32e-12	1.3e-10	g27356.t1
g19579.t1	1007.84	-1.10297	0.161454	-6.83149	8.4e-12	1.32e-10	g19579.t1
g20006.t1	295.155	1.02456	0.15	6.83035	8.47e-12	1.32e-10	g20006.t1
g39864.t1	533.197	-1.68547	0.246806	-6.82915	8.54e-12	1.34e-10	g39864.t1
g3030.t3	5411.06	-1.23361	0.180786	-6.82358	8.88e-12	1.39e-10	g3030.t3
g43535.t1	377.78	-1.03357	0.151474	-6.8234	8.89e-12	1.39e-10	g43535.t1
g34123.t1	512.416	1.17866	0.172883	6.81764	9.25e-12	1.44e-10	g34123.t1
g20595.t1	591.148	-1.09678	0.160925	-6.81549	9.39e-12	1.46e-10	g20595.t1
g44669.t1	969.855	-1.21408	0.178141	-6.81528	9.41e-12	1.46e-10	g44669.t1
g35562.t1	1257.71	-1.3976	0.205085	-6.8147	9.45e-12	1.47e-10	g35562.t1
g32639.t1	857.89	-1.96525	0.288431	-6.81357	9.52e-12	1.48e-10	g32639.t1
g5180.t2	729.232	-2.29584	0.336983	-6.81292	9.56e-12	1.48e-10	g5180.t2
g289.t1	3085.76	-1.19801	0.17597	-6.80802	9.89e-12	1.53e-10	g289.t1
g21473.t1	111.005	-2.39163	0.35143	-6.80541	1.01e-11	1.56e-10	g21473.t1
g39088.t1	363.166	-1.62301	0.238529	-6.80423	1.02e-11	1.57e-10	g39088.t1
g2595.t1	237.954	-2.03243	0.2988	-6.80197	1.03e-11	1.59e-10	g2595.t1
g40284.t1	228.854	1.74852	0.257072	6.80168	1.03e-11	1.6e-10	g40284.t1
g16798.t1	350.643	-1.36321	0.200505	-6.79887	1.05e-11	1.63e-10	g16798.t1
g32358.t1	815.496	-1.02561	0.150906	-6.79632	1.07e-11	1.66e-10	g32358.t1
g18026.t1	146.543	1.62994	0.239983	6.79187	1.11e-11	1.71e-10	g18026.t1
g9673.t1	477.914	-1.57716	0.232323	-6.78868	1.13e-11	1.74e-10	g9673.t1
g5807.t1	862.458	-1.60749	0.236809	-6.78812	1.14e-11	1.75e-10	g5807.t1
g19693.t1	857.793	-1.65388	0.243688	-6.78685	1.15e-11	1.76e-10	g19693.t1
g11480.t1	484.529	-1.92145	0.283312	-6.78212	1.18e-11	1.82e-10	g11480.t1
g10572.t1	95.2585	-2.08448	0.307459	-6.77969	1.2e-11	1.85e-10	g10572.t1
g29776.t1	34.6363	-8.8204	1.3012	-6.77868	1.21e-11	1.86e-10	g29776.t1
g12799.t1	7108.45	1.2583	0.185656	6.7776	1.22e-11	1.87e-10	g12799.t1
g35408.t1	786.005	-1.88029	0.277614	-6.77303	1.26e-11	1.93e-10	g35408.t1
g22998.t1	728.51	-1.08051	0.159705	-6.76567	1.33e-11	2.02e-10	g22998.t1
g22469.t1	1204.53	-1.31612	0.194661	-6.76105	1.37e-11	2.09e-10	g22469.t1
g14913.t1	2729.51	1.11518	0.164968	6.75996	1.38e-11	2.1e-10	g14913.t1
g33519.t1	329.164	-1.2502	0.185028	-6.75682	1.41e-11	2.14e-10	g33519.t1
g34420.t1	725.488	-1.25877	0.18637	-6.75415	1.44e-11	2.18e-10	g34420.t1
g26781.t1	404.029	-1.51174	0.223839	-6.75369	1.44e-11	2.19e-10	g26781.t1
g14134.t1	667.395	1.17327	0.173733	6.75329	1.45e-11	2.19e-10	g14134.t1
g35160.t1	663.763	-1.08123	0.160116	-6.75282	1.45e-11	2.2e-10	g35160.t1
g36383.t1	190.963	-1.87975	0.278672	-6.74539	1.53e-11	2.31e-10	g36383.t1
g25070.t1	455.854	-1.76349	0.261446	-6.74513	1.53e-11	2.31e-10	g25070.t1
g33663.t1	9604.83	-1.37446	0.203843	-6.74276	1.55e-11	2.35e-10	g33663.t1
g15080.t1	184.928	-1.34125	0.198935	-6.74218	1.56e-11	2.36e-10	g15080.t1
g39573.t1	1039.67	-1.1921	0.17683	-6.74151	1.57e-11	2.37e-10	g39573.t1
g29740.t1	320.626	-1.09711	0.162745	-6.74131	1.57e-11	2.37e-10	g29740.t1
g29468.t1	958.186	-1.40181	0.207964	-6.74065	1.58e-11	2.38e-10	g29468.t1
g25929.t1	283.964	1.12987	0.167712	6.73695	1.62e-11	2.43e-10	g25929.t1
g12349.t1	9851.2	-1.43704	0.213358	-6.73532	1.64e-11	2.46e-10	g12349.t1
g16095.t1	396.561	-1.27884	0.189953	-6.73238	1.67e-11	2.51e-10	g16095.t1
g18881.t1	93.5522	-2.73927	0.40698	-6.73072	1.69e-11	2.54e-10	g18881.t1
g29207.t1	141.109	-2.66667	0.396301	-6.7289	1.71e-11	2.57e-10	g29207.t1
g12172.t1	273.769	-2.08429	0.309921	-6.72522	1.75e-11	2.63e-10	g12172.t1
g41727.t1	663.828	1.0848	0.161315	6.72472	1.76e-11	2.64e-10	g41727.t1
g30863.t1	392.741	-1.4126	0.210194	-6.72048	1.81e-11	2.71e-10	g30863.t1
g31.t1	121.703	2.42224	0.360768	6.71411	1.89e-11	2.83e-10	g31.t1
g43564.t1	516.641	-1.98718	0.296236	-6.70809	1.97e-11	2.94e-10	g43564.t1
g11842.t1	314.324	-1.73549	0.25877	-6.70667	1.99e-11	2.96e-10	g11842.t1
g10693.t1	25332.2	-2.2749	0.339251	-6.70564	2.01e-11	2.98e-10	g10693.t1
g4171.t1	388.762	-2.17634	0.324575	-6.7052	2.01e-11	2.99e-10	g4171.t1
g41019.t1	44.4276	-9.18103	1.36939	-6.70447	2.02e-11	3.01e-10	g41019.t1
g4265.t1	242.235	-2.08606	0.311224	-6.70277	2.05e-11	3.04e-10	g4265.t1
g35652.t1	40.8688	8.53799	1.27395	6.70199	2.06e-11	3.05e-10	g35652.t1
g36756.t1	267.423	-1.41854	0.211724	-6.69995	2.08e-11	3.09e-10	g36756.t1
g35312.t1	917.458	1.03638	0.154751	6.69708	2.13e-11	3.15e-10	g35312.t1
g22574.t1	519.957	-1.4525	0.217067	-6.69149	2.21e-11	3.27e-10	g22574.t1
g36399.t1	552.864	-1.64579	0.245996	-6.69031	2.23e-11	3.29e-10	g36399.t1
g34771.t1	251.696	-1.59624	0.238728	-6.68645	2.29e-11	3.38e-10	g34771.t1
g40385.t1	535.747	1.23051	0.184077	6.68479	2.31e-11	3.42e-10	g40385.t1
g43428.t1	414.828	-1.54776	0.231594	-6.68308	2.34e-11	3.45e-10	g43428.t1
g1723.t1	656.399	-1.37638	0.206236	-6.67379	2.49e-11	3.67e-10	g1723.t1
g26793.t1	2367.68	-1.3634	0.204313	-6.6731	2.5e-11	3.69e-10	g26793.t1
g38526.t1	1751.69	1.8189	0.272747	6.6688	2.58e-11	3.79e-10	g38526.t1
g16093.t1	406.289	1.03488	0.155283	6.66449	2.66e-11	3.9e-10	g16093.t1
g29316.t1	92.0904	-2.05635	0.308559	-6.66438	2.66e-11	3.9e-10	g29316.t1
g1798.t1	261.584	-1.40205	0.210486	-6.66101	2.72e-11	3.99e-10	g1798.t1
g11523.t1	232.434	-1.73285	0.260373	-6.65526	2.83e-11	4.14e-10	g11523.t1
g12575.t1	40.9621	8.54111	1.28388	6.65257	2.88e-11	4.21e-10	g12575.t1
g10541.t1	541.427	-1.34627	0.202372	-6.65244	2.88e-11	4.22e-10	g10541.t1
g20764.t1	3863.22	-1.01578	0.152746	-6.65014	2.93e-11	4.27e-10	g20764.t1
g21077.t1	487.768	1.33148	0.20038	6.64479	3.04e-11	4.43e-10	g21077.t1
g5629.t1	177.204	1.37868	0.207603	6.64095	3.12e-11	4.54e-10	g5629.t1
g24953.t1	378.758	2.41353	0.363525	6.63925	3.15e-11	4.59e-10	g24953.t1
g16400.t1	3307.12	-1.38037	0.20799	-6.63671	3.21e-11	4.66e-10	g16400.t1
g42518.t1	394.467	-1.33135	0.200621	-6.63618	3.22e-11	4.68e-10	g42518.t1
g43227.t1	320.271	-1.67714	0.252732	-6.63602	3.22e-11	4.68e-10	g43227.t1
g26645.t1	610.909	1.0288	0.155125	6.63209	3.31e-11	4.8e-10	g26645.t1
g33.t1	878.919	-1.04479	0.157549	-6.63152	3.32e-11	4.82e-10	g33.t1
g4651.t1	681.427	-1.66275	0.25093	-6.62636	3.44e-11	4.98e-10	g4651.t1
g33657.t1	452.271	-1.18184	0.178384	-6.62525	3.47e-11	5.02e-10	g33657.t1
g24736.t1	1707.14	-1.34928	0.203699	-6.6239	3.5e-11	5.06e-10	g24736.t1
g24880.t1	47.1505	-2.47211	0.373208	-6.62394	3.5e-11	5.06e-10	g24880.t1
g5619.t1	356.576	-2.19978	0.332252	-6.62083	3.57e-11	5.16e-10	g5619.t1
g1770.t1	710.337	-1.65902	0.250584	-6.62061	3.58e-11	5.17e-10	g1770.t1
g29439.t1	649.161	-1.13362	0.171303	-6.61762	3.65e-11	5.27e-10	g29439.t1
g8124.t1	39.058	8.47234	1.28061	6.61586	3.69e-11	5.33e-10	g8124.t1
g43491.t1	489.516	-1.34688	0.203603	-6.61521	3.71e-11	5.35e-10	g43491.t1
g30419.t1	718.747	-1.1679	0.176724	-6.6086	3.88e-11	5.59e-10	g30419.t1
g22670.t1	857.735	-1.62017	0.245286	-6.60523	3.97e-11	5.71e-10	g22670.t1
g26690.t1	285.592	-1.16136	0.175898	-6.60246	4.04e-11	5.82e-10	g26690.t1
g26012.t1	574.044	-1.18149	0.178958	-6.60208	4.05e-11	5.83e-10	g26012.t1
g24816.t1	883.398	-1.02789	0.155713	-6.60114	4.08e-11	5.86e-10	g24816.t1
g773.t1	1028.27	-1.74799	0.264869	-6.59945	4.13e-11	5.93e-10	g773.t1
g41255.t1	235.115	-1.57727	0.239026	-6.59872	4.15e-11	5.95e-10	g41255.t1
g25132.t1	814.678	-1.36866	0.207438	-6.59795	4.17e-11	5.98e-10	g25132.t1
g41191.t1	28.4133	-8.53574	1.29398	-6.59651	4.21e-11	6.03e-10	g41191.t1
g2336.t1	2553.19	-1.70958	0.25937	-6.59127	4.36e-11	6.24e-10	g2336.t1
g42731.t2	276.716	1.24547	0.188996	6.58991	4.4e-11	6.29e-10	g42731.t2
g14514.t1	102.029	2.45136	0.372428	6.58211	4.64e-11	6.62e-10	g14514.t1
g14266.t1	225.38	-2.01022	0.305476	-6.58063	4.68e-11	6.68e-10	g14266.t1
g24180.t1	181.036	-2.33052	0.354557	-6.57306	4.93e-11	7.02e-10	g24180.t1
g44728.t1	287.49	-2.11739	0.322143	-6.57282	4.94e-11	7.03e-10	g44728.t1
g37053.t1	631.263	-1.13848	0.173313	-6.56895	5.07e-11	7.2e-10	g37053.t1
g31146.t1	1386.09	1.33316	0.202993	6.56756	5.11e-11	7.27e-10	g31146.t1
g8558.t1	2763.9	-1.43942	0.219371	-6.56158	5.32e-11	7.55e-10	g8558.t1
g30795.t1	35.5865	8.33838	1.27223	6.55412	5.6e-11	7.93e-10	g30795.t1
g22815.t1	485.141	-1.24787	0.190467	-6.55165	5.69e-11	8.05e-10	g22815.t1
g21942.t1	586.978	1.35717	0.207236	6.54889	5.8e-11	8.19e-10	g21942.t1
g44499.t1	1809.38	-1.10057	0.168061	-6.54865	5.81e-11	8.2e-10	g44499.t1
g23621.t1	238.655	-1.20564	0.184127	-6.54786	5.84e-11	8.24e-10	g23621.t1
g1596.t1	2944.43	1.51869	0.232044	6.54483	5.96e-11	8.4e-10	g1596.t1
g39020.t1	254.954	-2.04762	0.312872	-6.54459	5.97e-11	8.4e-10	g39020.t1
g41579.t1	137.632	1.59117	0.243218	6.54215	6.06e-11	8.54e-10	g41579.t1
g25150.t1	276.383	1.82798	0.27943	6.54184	6.08e-11	8.55e-10	g25150.t1
g19712.t2	249.616	2.41531	0.36934	6.53954	6.17e-11	8.67e-10	g19712.t2
g20511.t1	1603.61	-1.12976	0.172933	-6.53293	6.45e-11	9.05e-10	g20511.t1
g27573.t1	316.036	-1.97661	0.302562	-6.5329	6.45e-11	9.05e-10	g27573.t1
g44303.t1	79.1911	2.2116	0.338533	6.53289	6.45e-11	9.05e-10	g44303.t1
g37490.t1	15767.1	-1.07047	0.164008	-6.52693	6.71e-11	9.41e-10	g37490.t1
g38454.t1	472.69	-1.51381	0.231938	-6.52678	6.72e-11	9.41e-10	g38454.t1
g32682.t1	1016.37	-1.11288	0.170655	-6.52119	6.98e-11	9.76e-10	g32682.t1
g15740.t1	584.392	-1.0118	0.15523	-6.51808	7.12e-11	9.94e-10	g15740.t1
g23910.t1	515.209	-1.24079	0.19038	-6.5174	7.15e-11	9.98e-10	g23910.t1
g19995.t1	356.549	-1.19156	0.183046	-6.50964	7.53e-11	1.05e-09	g19995.t1
g17948.t1	425.54	1.88671	0.289863	6.50898	7.57e-11	1.05e-09	g17948.t1
g2204.t1	9772.6	1.00706	0.154763	6.5071	7.66e-11	1.07e-09	g2204.t1
g30918.t1	1868.73	1.09122	0.167759	6.50467	7.79e-11	1.08e-09	g30918.t1
g28427.t1	310.974	-1.62463	0.249778	-6.50429	7.81e-11	1.08e-09	g28427.t1
g45274.t1	378.448	1.03893	0.159736	6.50408	7.82e-11	1.08e-09	g45274.t1
g20730.t1	452.78	-1.3082	0.201242	-6.50065	8e-11	1.11e-09	g20730.t1
g13455.t1	353.484	-1.24886	0.192122	-6.50034	8.01e-11	1.11e-09	g13455.t1
g41425.t1	406.464	-1.0481	0.161276	-6.49882	8.1e-11	1.12e-09	g41425.t1
g34381.t1	310.346	-2.14091	0.329579	-6.49588	8.25e-11	1.14e-09	g34381.t1
g41475.t1	335.71	-1.0711	0.16492	-6.49464	8.32e-11	1.15e-09	g41475.t1
g17370.t1	26.8388	-8.45336	1.30168	-6.49418	8.35e-11	1.15e-09	g17370.t1
g1476.t1	104.055	-1.55932	0.240258	-6.49021	8.57e-11	1.18e-09	g1476.t1
g8012.t1	137.235	-2.57369	0.396675	-6.48817	8.69e-11	1.2e-09	g8012.t1
g35446.t1	2111.11	-1.62282	0.250257	-6.48461	8.9e-11	1.23e-09	g35446.t1
g35009.t1	253.014	-1.61161	0.248628	-6.48201	9.05e-11	1.25e-09	g35009.t1
g9889.t1	172.118	-2.12385	0.327776	-6.47959	9.2e-11	1.27e-09	g9889.t1
g11828.t1	968.695	-1.06486	0.164364	-6.47869	9.25e-11	1.27e-09	g11828.t1
g24541.t1	119.43	-1.64487	0.253915	-6.47802	9.29e-11	1.28e-09	g24541.t1
g7129.t1	1402.97	1.08133	0.167101	6.47109	9.73e-11	1.33e-09	g7129.t1
g18614.t1	58.2812	2.4599	0.380273	6.46878	9.88e-11	1.35e-09	g18614.t1
g39819.t1	1094.97	-1.109	0.17152	-6.46568	1.01e-10	1.38e-09	g39819.t1
g7502.t1	297.096	-1.20805	0.186857	-6.46508	1.01e-10	1.38e-09	g7502.t1
g19601.t1	604.677	-1.19986	0.185641	-6.46335	1.02e-10	1.4e-09	g19601.t1
g23904.t1	479.672	-1.10479	0.170931	-6.46337	1.02e-10	1.4e-09	g23904.t1
g33590.t1	485.734	-1.27971	0.198047	-6.46164	1.04e-10	1.41e-09	g33590.t1
g10618.t1	922.639	-1.26085	0.195171	-6.46022	1.05e-10	1.43e-09	g10618.t1
g33304.t1	320.007	-1.00553	0.155781	-6.45478	1.08e-10	1.48e-09	g33304.t1
g15799.t1	257.626	1.22241	0.189501	6.45066	1.11e-10	1.52e-09	g15799.t1
g390.t1	347.504	-1.31745	0.20425	-6.45016	1.12e-10	1.52e-09	g390.t1
g19029.t1	828.608	1.28279	0.198876	6.4502	1.12e-10	1.52e-09	g19029.t1
g33261.t1	27.4312	-8.48411	1.31553	-6.44921	1.12e-10	1.53e-09	g33261.t1
g30083.t1	704.366	-1.74617	0.270818	-6.44777	1.14e-10	1.54e-09	g30083.t1
g27577.t1	2934.18	-2.12685	0.329874	-6.44746	1.14e-10	1.54e-09	g27577.t1
g36035.t1	1351.84	-1.04933	0.162749	-6.4475	1.14e-10	1.54e-09	g36035.t1
g31579.t1	559.449	-1.20577	0.187135	-6.44331	1.17e-10	1.58e-09	g31579.t1
g22644.t1	130.744	1.785	0.277073	6.44233	1.18e-10	1.59e-09	g22644.t1
g37123.t1	302.837	-1.66109	0.25788	-6.44134	1.18e-10	1.6e-09	g37123.t1
g32006.t1	1444.63	-1.10877	0.17216	-6.44034	1.19e-10	1.61e-09	g32006.t1
g24838.t1	356.758	-1.43409	0.222723	-6.43888	1.2e-10	1.63e-09	g24838.t1
g41674.t1	1903.77	-1.0267	0.159543	-6.43525	1.23e-10	1.67e-09	g41674.t1
g40266.t1	414.482	-1.42927	0.22211	-6.43495	1.24e-10	1.67e-09	g40266.t1
g15527.t1	32.6172	8.21244	1.27627	6.43472	1.24e-10	1.67e-09	g15527.t1
g42689.t1	36.3348	-8.89008	1.38177	-6.43381	1.24e-10	1.68e-09	g42689.t1
g23036.t1	608.25	-1.37157	0.213251	-6.43172	1.26e-10	1.7e-09	g23036.t1
g24646.t1	151.029	1.37563	0.213901	6.43113	1.27e-10	1.71e-09	g24646.t1
g16175.t1	565.039	-1.39187	0.21648	-6.42955	1.28e-10	1.72e-09	g16175.t1
g4365.t1	324.113	1.40001	0.217749	6.42945	1.28e-10	1.72e-09	g4365.t1
g22637.t1	483.614	-1.17661	0.183073	-6.427	1.3e-10	1.75e-09	g22637.t1
g4781.t1	98.0376	1.78259	0.277397	6.42614	1.31e-10	1.76e-09	g4781.t1
g5551.t1	1131.72	-1.08199	0.168459	-6.42285	1.34e-10	1.79e-09	g5551.t1
g42999.t1	35.0113	8.31458	1.29452	6.42292	1.34e-10	1.79e-09	g42999.t1
g3009.t1	1029.76	-1.16545	0.181602	-6.41759	1.38e-10	1.86e-09	g3009.t1
g18549.t1	2944.54	1.15859	0.180547	6.41712	1.39e-10	1.86e-09	g18549.t1
g14235.t1	231.353	-1.44129	0.224643	-6.41589	1.4e-10	1.87e-09	g14235.t1
g27725.t1	248.334	-1.4476	0.225661	-6.41491	1.41e-10	1.89e-09	g27725.t1
g35195.t1	216.301	1.38636	0.216128	6.41455	1.41e-10	1.89e-09	g35195.t1
g15915.t1	32.0578	8.1875	1.27654	6.41384	1.42e-10	1.9e-09	g15915.t1
g27288.t1	436.471	-1.59636	0.248975	-6.41174	1.44e-10	1.92e-09	g27288.t1
g9983.t1	341.893	-1.66666	0.260099	-6.40779	1.48e-10	1.97e-09	g9983.t1
g14052.t1	234.964	-1.3108	0.20462	-6.40602	1.49e-10	1.99e-09	g14052.t1
g43725.t1	149.475	1.94013	0.302942	6.40428	1.51e-10	2.01e-09	g43725.t1
g32440.t1	289.084	-1.49248	0.23312	-6.4022	1.53e-10	2.04e-09	g32440.t1
g14798.t1	645.025	-1.91844	0.299854	-6.3979	1.58e-10	2.09e-09	g14798.t1
g8428.t1	323.81	-1.46111	0.228422	-6.39653	1.59e-10	2.11e-09	g8428.t1
g32293.t1	240.848	-2.21657	0.346639	-6.39447	1.61e-10	2.14e-09	g32293.t1
g9115.t1	272.59	-1.68157	0.263078	-6.39191	1.64e-10	2.17e-09	g9115.t1
g7497.t1	328.608	-1.78091	0.278653	-6.39117	1.65e-10	2.18e-09	g7497.t1
g23355.t1	4219.84	-1.58611	0.248246	-6.38927	1.67e-10	2.21e-09	g23355.t1
g30569.t1	20807.3	-1.0532	0.164915	-6.38635	1.7e-10	2.25e-09	g30569.t1
g27558.t1	1031.15	-1.0316	0.161561	-6.38523	1.71e-10	2.26e-09	g27558.t1
g44424.t1	268.981	-1.43596	0.224906	-6.3847	1.72e-10	2.27e-09	g44424.t1
g34031.t1	2351.17	-1.60626	0.251839	-6.37813	1.79e-10	2.37e-09	g34031.t1
g2579.t1	27324.6	-1.5546	0.244048	-6.37007	1.89e-10	2.49e-09	g2579.t1
g38589.t1	286.787	-1.27798	0.200622	-6.37009	1.89e-10	2.49e-09	g38589.t1
g21355.t1	291.414	-2.45072	0.384833	-6.36827	1.91e-10	2.51e-09	g21355.t1
g7664.t1	96.2405	-2.74236	0.430639	-6.36812	1.91e-10	2.52e-09	g7664.t1
g21601.t1	1535.25	-1.08693	0.17069	-6.36786	1.92e-10	2.52e-09	g21601.t1
g18127.t1	320.762	1.31498	0.206508	6.36772	1.92e-10	2.52e-09	g18127.t1
g30700.t1	243.643	1.97479	0.310256	6.36505	1.95e-10	2.56e-09	g30700.t1
g15694.t1	326.725	-1.67217	0.262725	-6.36472	1.96e-10	2.57e-09	g15694.t1
g16386.t1	352.765	1.20912	0.189978	6.36454	1.96e-10	2.57e-09	g16386.t1
g41299.t1	2608.51	-1.41259	0.221981	-6.36359	1.97e-10	2.58e-09	g41299.t1
g21967.t1	2139.77	-1.52262	0.239274	-6.36352	1.97e-10	2.58e-09	g21967.t1
g7742.t2	14.5661	-21.6773	3.40814	-6.36044	2.01e-10	2.63e-09	g7742.t2
g23809.t1	962.818	-1.15795	0.1821	-6.3589	2.03e-10	2.66e-09	g23809.t1
g41774.t1	1666.67	-1.69553	0.266719	-6.357	2.06e-10	2.69e-09	g41774.t1
g6990.t1	1625.61	1.10044	0.173159	6.35506	2.08e-10	2.72e-09	g6990.t1
g23427.t1	634.257	1.2816	0.201695	6.35413	2.1e-10	2.74e-09	g23427.t1
g39773.t1	1128.15	-1.08772	0.171232	-6.35228	2.12e-10	2.77e-09	g39773.t1
g42339.t1	1018.5	-1.37403	0.216449	-6.34806	2.18e-10	2.84e-09	g42339.t1
g8646.t1	665.878	-1.1461	0.180774	-6.33992	2.3e-10	2.99e-09	g8646.t1
g4968.t2	612.512	-2.75427	0.434486	-6.33915	2.31e-10	3e-09	g4968.t2
g5510.t1	279.631	-1.55759	0.24574	-6.33838	2.32e-10	3.01e-09	g5510.t1
g6880.t1	214.738	-1.57075	0.247845	-6.33764	2.33e-10	3.03e-09	g6880.t1
g45564.t1	239.1	1.01027	0.159485	6.33454	2.38e-10	3.09e-09	g45564.t1
g1812.t1	236.475	1.80111	0.284627	6.32796	2.48e-10	3.22e-09	g1812.t1
g6003.t1	29.9538	8.08963	1.27846	6.32762	2.49e-10	3.22e-09	g6003.t1
g24414.t1	1506.84	-1.2095	0.191185	-6.32635	2.51e-10	3.25e-09	g24414.t1
g28071.t1	773.515	-1.23544	0.195287	-6.32627	2.51e-10	3.25e-09	g28071.t1
g18573.t1	1741.34	-1.42147	0.224837	-6.32225	2.58e-10	3.33e-09	g18573.t1
g40418.t1	507.142	-1.36862	0.216523	-6.32091	2.6e-10	3.36e-09	g40418.t1
g1290.t1	468.776	-1.48759	0.235402	-6.31935	2.63e-10	3.39e-09	g1290.t1
g40060.t1	1382.1	-1.1246	0.177967	-6.31916	2.63e-10	3.39e-09	g40060.t1
g6513.t1	507.884	-1.97404	0.312418	-6.31858	2.64e-10	3.4e-09	g6513.t1
g37329.t1	208.413	-1.77951	0.281697	-6.31709	2.67e-10	3.43e-09	g37329.t1
g22926.t1	430.015	-1.15576	0.182972	-6.31661	2.67e-10	3.44e-09	g22926.t1
g31695.t1	1526.16	1.28669	0.203823	6.31276	2.74e-10	3.52e-09	g31695.t1
g22813.t1	193.385	-1.53231	0.242817	-6.31057	2.78e-10	3.57e-09	g22813.t1
g6490.t1	1025.77	-1.9319	0.306144	-6.31042	2.78e-10	3.57e-09	g6490.t1
g34551.t1	1770.29	-1.21536	0.19272	-6.30635	2.86e-10	3.66e-09	g34551.t1
g30148.t1	246.087	-2.26966	0.35991	-6.30619	2.86e-10	3.67e-09	g30148.t1
g42180.t1	1984.26	1.25601	0.199243	6.30391	2.9e-10	3.72e-09	g42180.t1
g4092.t1	334.588	-1.19709	0.18996	-6.30183	2.94e-10	3.77e-09	g4092.t1
g3552.t1	286.576	1.22088	0.193863	6.29766	3.02e-10	3.86e-09	g3552.t1
g30139.t1	348.589	-1.29937	0.206404	-6.29527	3.07e-10	3.92e-09	g30139.t1
g4123.t1	443.371	-1.66354	0.264303	-6.29406	3.09e-10	3.95e-09	g4123.t1
g33136.t1	291.836	-1.2306	0.195598	-6.29146	3.14e-10	4.02e-09	g33136.t1
g27241.t2	3463.3	1.81238	0.28809	6.29102	3.15e-10	4.03e-09	g27241.t2
g35853.t1	399.146	-1.29401	0.205738	-6.28959	3.18e-10	4.06e-09	g35853.t1
g23716.t1	907.176	-1.28374	0.204114	-6.28931	3.19e-10	4.06e-09	g23716.t1
g25639.t1	217.34	-1.28748	0.204835	-6.28547	3.27e-10	4.16e-09	g25639.t1
g12326.t1	2249.33	1.05146	0.167314	6.28434	3.29e-10	4.18e-09	g12326.t1
g12446.t1	436.14	-1.23871	0.197119	-6.28407	3.3e-10	4.19e-09	g12446.t1
g27668.t1	417.615	-1.32906	0.211576	-6.2817	3.35e-10	4.25e-09	g27668.t1
g39581.t1	5908.24	-1.40162	0.223303	-6.27674	3.46e-10	4.38e-09	g39581.t1
g41266.t1	448.718	-1.24236	0.197953	-6.27602	3.47e-10	4.4e-09	g41266.t1
g24896.t1	401.388	-1.31847	0.210228	-6.27163	3.57e-10	4.52e-09	g24896.t1
g6368.t1	5152.99	-1.15652	0.18442	-6.27114	3.58e-10	4.53e-09	g6368.t1
g26581.t1	189.213	-1.26762	0.2022	-6.26911	3.63e-10	4.59e-09	g26581.t1
g4125.t1	318.918	-1.07279	0.171138	-6.26855	3.64e-10	4.6e-09	g4125.t1
g39684.t1	464.719	-1.11133	0.177343	-6.26656	3.69e-10	4.66e-09	g39684.t1
g15620.t1	29.6913	8.07689	1.29006	6.26088	3.83e-10	4.83e-09	g15620.t1
g33357.t1	34.7385	-8.82677	1.40998	-6.26022	3.84e-10	4.85e-09	g33357.t1
g658.t1	252.378	-1.79662	0.287023	-6.2595	3.86e-10	4.87e-09	g658.t1
g14125.t1	1863.14	1.42066	0.226981	6.25896	3.88e-10	4.88e-09	g14125.t1
g327.t1	128.251	1.84326	0.29453	6.25832	3.89e-10	4.9e-09	g327.t1
g10683.t1	1522.66	-1.94527	0.310845	-6.258	3.9e-10	4.91e-09	g10683.t1
g4069.t1	512.537	-1.31169	0.209613	-6.25767	3.91e-10	4.92e-09	g4069.t1
g11747.t1	972.776	-1.24594	0.199154	-6.25614	3.95e-10	4.96e-09	g11747.t1
g34383.t1	129.059	1.49527	0.239111	6.25347	4.01e-10	5.04e-09	g34383.t1
g18330.t1	1259.99	1.19384	0.190965	6.25162	4.06e-10	5.1e-09	g18330.t1
g42645.t1	518.382	-1.83309	0.293388	-6.24801	4.16e-10	5.21e-09	g42645.t1
g42649.t1	770.661	1.32051	0.211381	6.24706	4.18e-10	5.24e-09	g42649.t1
g9743.t1	122.204	1.72786	0.276679	6.245	4.24e-10	5.31e-09	g9743.t1
g495.t1	277.088	-1.43201	0.22931	-6.24488	4.24e-10	5.31e-09	g495.t1
g13852.t1	94.2824	1.92299	0.308006	6.24337	4.28e-10	5.36e-09	g13852.t1
g13261.t2	220.082	-1.33305	0.213753	-6.23638	4.48e-10	5.6e-09	g13261.t2
g6020.t1	218.149	-1.06389	0.170603	-6.23609	4.49e-10	5.6e-09	g6020.t1
g38088.t1	467.314	1.17028	0.187764	6.23273	4.58e-10	5.72e-09	g38088.t1
g34727.t1	29.8415	8.08415	1.29918	6.22251	4.89e-10	6.08e-09	g34727.t1
g1812.t2	232.793	2.52588	0.406047	6.22066	4.95e-10	6.15e-09	g1812.t2
g44883.t1	454.641	-2.79981	0.450345	-6.21704	5.07e-10	6.29e-09	g44883.t1
g23501.t1	207.009	-1.46467	0.235835	-6.21055	5.28e-10	6.55e-09	g23501.t1
g32288.t1	924.075	-1.26449	0.203609	-6.21041	5.28e-10	6.55e-09	g32288.t1
g5906.t1	874.445	-1.21767	0.196115	-6.20894	5.33e-10	6.61e-09	g5906.t1
g10462.t1	103.193	-2.39731	0.386843	-6.1971	5.75e-10	7.1e-09	g10462.t1
g26058.t1	151.124	2.16709	0.349812	6.19503	5.83e-10	7.19e-09	g26058.t1
g39776.t1	6702.54	-1.47188	0.237608	-6.19458	5.84e-10	7.21e-09	g39776.t1
g19039.t1	272.483	-1.55393	0.250878	-6.19398	5.87e-10	7.23e-09	g19039.t1
g4524.t1	28.0221	7.99343	1.29071	6.19304	5.9e-10	7.27e-09	g4524.t1
g22309.t1	93.6565	2.29773	0.371025	6.19292	5.91e-10	7.28e-09	g22309.t1
g21666.t1	330.528	-1.0604	0.17124	-6.19247	5.92e-10	7.29e-09	g21666.t1
g23556.t1	166	-1.41527	0.228557	-6.19219	5.93e-10	7.3e-09	g23556.t1
g23433.t1	203.793	-1.46387	0.236434	-6.19144	5.96e-10	7.33e-09	g23433.t1
g21008.t1	489.956	-1.12736	0.182122	-6.19014	6.01e-10	7.39e-09	g21008.t1
g14805.t1	80.4872	-2.75177	0.444687	-6.18809	6.09e-10	7.48e-09	g14805.t1
g42949.t1	146.163	1.91697	0.309792	6.18793	6.1e-10	7.49e-09	g42949.t1
g12434.t1	388.941	1.16593	0.188473	6.18617	6.16e-10	7.57e-09	g12434.t1
g4897.t1	384.064	-1.69365	0.273884	-6.18382	6.26e-10	7.68e-09	g4897.t1
g30803.t1	1718.96	-1.33951	0.216656	-6.18266	6.3e-10	7.73e-09	g30803.t1
g24397.t1	962.331	1.05934	0.171555	6.17493	6.62e-10	8.09e-09	g24397.t1
g22955.t1	79.6156	4.3757	0.708651	6.17469	6.63e-10	8.1e-09	g22955.t1
g19237.t1	347.435	-1.3546	0.219457	-6.17251	6.72e-10	8.21e-09	g19237.t1
g38847.t1	640.135	-1.59508	0.258546	-6.16941	6.85e-10	8.37e-09	g38847.t1
g38403.t3	1699.69	1.15215	0.186789	6.16817	6.91e-10	8.43e-09	g38403.t3
g32979.t1	161.465	1.81911	0.295042	6.1656	7.02e-10	8.56e-09	g32979.t1
g3020.t1	425.374	-1.29447	0.210009	-6.16387	7.1e-10	8.65e-09	g3020.t1
g26118.t1	1708.56	-1.07527	0.174491	-6.16231	7.17e-10	8.73e-09	g26118.t1
g24991.t1	132.798	-1.69757	0.275496	-6.16187	7.19e-10	8.75e-09	g24991.t1
g31054.t1	3038.28	-1.09226	0.17727	-6.16154	7.2e-10	8.76e-09	g31054.t1
g35866.t1	256.994	-1.24129	0.201555	-6.15855	7.34e-10	8.92e-09	g35866.t1
g12509.t1	2066.84	-1.61927	0.263115	-6.15424	7.54e-10	9.16e-09	g12509.t1
g24246.t1	310.453	-2.19251	0.356481	-6.15042	7.73e-10	9.37e-09	g24246.t1
g44853.t1	639.805	-1.91278	0.311115	-6.14815	7.84e-10	9.49e-09	g44853.t1
g7699.t1	2812.79	-1.08125	0.17587	-6.14799	7.85e-10	9.5e-09	g7699.t1
g26052.t1	214.051	1.42133	0.231294	6.14511	7.99e-10	9.67e-09	g26052.t1
g19547.t1	278.355	-1.43477	0.233504	-6.1445	8.02e-10	9.7e-09	g19547.t1
g3983.t1	259.271	-1.35006	0.219794	-6.1424	8.13e-10	9.82e-09	g3983.t1
g26144.t1	15142.9	-1.58422	0.257948	-6.14164	8.17e-10	9.86e-09	g26144.t1
g29832.t1	146.693	-1.53953	0.250695	-6.14106	8.2e-10	9.89e-09	g29832.t1
g35435.t1	388.651	1.07592	0.175242	6.13963	8.27e-10	9.97e-09	g35435.t1
g14929.t1	123.078	-1.46409	0.238543	-6.13762	8.38e-10	1.01e-08	g14929.t1
g29637.t1	286.413	-1.39482	0.227272	-6.1372	8.4e-10	1.01e-08	g29637.t1
g36101.t1	238.292	-1.84704	0.301058	-6.13516	8.51e-10	1.02e-08	g36101.t1
g17724.t1	116.711	-1.47319	0.240144	-6.1346	8.54e-10	1.03e-08	g17724.t1
g9503.t1	201.576	2.03739	0.332204	6.13294	8.63e-10	1.04e-08	g9503.t1
g35033.t1	444.719	-1.86661	0.304386	-6.13237	8.66e-10	1.04e-08	g35033.t1
g43690.t1	232.208	1.26819	0.206823	6.13178	8.69e-10	1.04e-08	g43690.t1
g2407.t1	118.105	2.0073	0.327423	6.13061	8.75e-10	1.05e-08	g2407.t1
g15202.t1	181.55	-2.21303	0.361048	-6.12945	8.82e-10	1.06e-08	g15202.t1
g30060.t1	579.497	-1.66139	0.271069	-6.12903	8.84e-10	1.06e-08	g30060.t1
g12630.t1	694.432	-2.0798	0.339493	-6.12618	9e-10	1.08e-08	g12630.t1
g22197.t1	100.695	-2.26303	0.369573	-6.12336	9.16e-10	1.1e-08	g22197.t1
g19804.t1	28.763	8.03095	1.3116	6.12302	9.18e-10	1.1e-08	g19804.t1
g10623.t1	264.878	-1.20403	0.196651	-6.12267	9.2e-10	1.1e-08	g10623.t1
g36183.t1	3551.17	-1.33359	0.217868	-6.12108	9.29e-10	1.11e-08	g36183.t1
g10921.t1	27.1156	7.94626	1.29878	6.11824	9.46e-10	1.13e-08	g10921.t1
g9060.t1	149.571	1.31224	0.214621	6.11425	9.7e-10	1.16e-08	g9060.t1
g6475.t1	7282.68	-1.09275	0.179008	-6.10445	1.03e-09	1.23e-08	g6475.t1
g39928.t1	983.453	-1.65578	0.271449	-6.09979	1.06e-09	1.26e-08	g39928.t1
g14102.t1	287.187	-1.19094	0.195249	-6.09958	1.06e-09	1.26e-08	g14102.t1
g9849.t1	26.0604	7.8888	1.2935	6.09878	1.07e-09	1.27e-08	g9849.t1
g2106.t1	455.633	1.50246	0.246362	6.09858	1.07e-09	1.27e-08	g2106.t1
g14942.t1	250.68	-1.47801	0.242456	-6.09599	1.09e-09	1.29e-08	g14942.t1
g39453.t1	273.207	-1.10247	0.181029	-6.09003	1.13e-09	1.34e-08	g39453.t1
g4960.t1	142.29	-1.26869	0.208386	-6.08819	1.14e-09	1.35e-08	g4960.t1
g1189.t1	255.128	-1.39288	0.228817	-6.08732	1.15e-09	1.36e-08	g1189.t1
g30493.t1	1881.79	-1.2604	0.207095	-6.08613	1.16e-09	1.37e-08	g30493.t1
g24367.t1	291.581	1.13286	0.18614	6.08606	1.16e-09	1.37e-08	g24367.t1
g43701.t2	481.249	-1.39614	0.229441	-6.08496	1.17e-09	1.38e-08	g43701.t2
g27662.t1	322.462	-1.34417	0.220934	-6.08404	1.17e-09	1.38e-08	g27662.t1
g31354.t1	920.007	1.13567	0.186867	6.07741	1.22e-09	1.44e-08	g31354.t1
g16476.t1	140.23	2.93382	0.482894	6.07549	1.24e-09	1.46e-08	g16476.t1
g41776.t1	143.277	-1.93519	0.318794	-6.07036	1.28e-09	1.5e-08	g41776.t1
g14604.t1	158.172	-1.9857	0.327137	-6.06995	1.28e-09	1.5e-08	g14604.t1
g26128.t1	317.652	1.64975	0.271893	6.06766	1.3e-09	1.53e-08	g26128.t1
g25460.t1	38.3808	-8.97067	1.4786	-6.06702	1.3e-09	1.53e-08	g25460.t1
g21465.t1	1472.08	-1.06477	0.175512	-6.06665	1.31e-09	1.53e-08	g21465.t1
g24704.t1	471.801	1.13408	0.187029	6.06365	1.33e-09	1.56e-08	g24704.t1
g40427.t1	88.3394	2.40611	0.396931	6.06178	1.35e-09	1.58e-08	g40427.t1
g6540.t1	2020.56	-1.24189	0.204882	-6.06148	1.35e-09	1.58e-08	g6540.t1
g35993.t1	146.299	-1.73412	0.286104	-6.06116	1.35e-09	1.58e-08	g35993.t1
g39662.t1	225.015	1.0078	0.166314	6.05962	1.36e-09	1.6e-08	g39662.t1
g1861.t1	896.829	-1.42742	0.235644	-6.05752	1.38e-09	1.62e-08	g1861.t1
g21710.t1	553.793	-1.34817	0.222686	-6.05414	1.41e-09	1.65e-08	g21710.t1
g24502.t1	576.946	-1.01843	0.168268	-6.05244	1.43e-09	1.66e-08	g24502.t1
g34698.t1	3186.65	-1.30185	0.215189	-6.04981	1.45e-09	1.69e-08	g34698.t1
g44676.t2	83.8469	2.38954	0.395229	6.04595	1.49e-09	1.73e-08	g44676.t2
g16493.t1	2642.12	-1.38994	0.22991	-6.04558	1.49e-09	1.73e-08	g16493.t1
g21563.t1	1997.03	1.33971	0.221603	6.04554	1.49e-09	1.73e-08	g21563.t1
g23186.t1	393.859	-1.3019	0.215503	-6.04122	1.53e-09	1.78e-08	g23186.t1
g13056.t1	4559.3	-1.03054	0.170666	-6.03832	1.56e-09	1.81e-08	g13056.t1
g36279.t1	115.829	-3.26532	0.540766	-6.03832	1.56e-09	1.81e-08	g36279.t1
g2297.t1	3713.66	1.11579	0.184795	6.03802	1.56e-09	1.81e-08	g2297.t1
g6876.t1	38753	-2.00136	0.331771	-6.03236	1.62e-09	1.87e-08	g6876.t1
g11087.t1	2348.82	-1.02627	0.170165	-6.03103	1.63e-09	1.89e-08	g11087.t1
g19551.t1	246.004	-1.05136	0.174356	-6.02997	1.64e-09	1.9e-08	g19551.t1
g4052.t1	128.572	1.56008	0.258728	6.0298	1.64e-09	1.9e-08	g4052.t1
g40666.t1	929.233	-1.13114	0.187648	-6.028	1.66e-09	1.92e-08	g40666.t1
g23109.t1	186.604	-1.41026	0.233959	-6.0278	1.66e-09	1.92e-08	g23109.t1
g1968.t1	28.525	8.01889	1.33061	6.02646	1.68e-09	1.94e-08	g1968.t1
g24060.t1	332.688	-1.58673	0.263296	-6.02641	1.68e-09	1.94e-08	g24060.t1
g33844.t1	80.6513	-2.20504	0.365906	-6.02626	1.68e-09	1.94e-08	g33844.t1
g10500.t1	405.905	-1.15772	0.192128	-6.02579	1.68e-09	1.94e-08	g10500.t1
g6376.t1	1120.54	-1.14727	0.190481	-6.02302	1.71e-09	1.97e-08	g6376.t1
g34294.t1	1158.21	-1.07172	0.178017	-6.0203	1.74e-09	2.01e-08	g34294.t1
g34100.t1	1179.63	-1.63494	0.271594	-6.01979	1.75e-09	2.01e-08	g34100.t1
g2677.t1	497.094	1.35152	0.224556	6.01861	1.76e-09	2.03e-08	g2677.t1
g12102.t1	172.076	-1.70467	0.28338	-6.01549	1.79e-09	2.06e-08	g12102.t1
g3880.t1	785.043	-1.20029	0.199689	-6.0108	1.85e-09	2.12e-08	g3880.t1
g27713.t1	365.91	-1.13531	0.188999	-6.00694	1.89e-09	2.17e-08	g27713.t1
g24157.t1	1999.33	-2.18552	0.363955	-6.00491	1.91e-09	2.2e-08	g24157.t1
g12238.t1	1325.58	-1.4965	0.249216	-6.00481	1.92e-09	2.2e-08	g12238.t1
g10504.t1	444.816	-1.5021	0.250155	-6.00467	1.92e-09	2.2e-08	g10504.t1
g24923.t1	157.574	-1.66691	0.277718	-6.00215	1.95e-09	2.23e-08	g24923.t1
g11694.t1	85.9801	-2.24396	0.374049	-5.99911	1.98e-09	2.28e-08	g11694.t1
g29854.t1	593.865	-1.48048	0.246812	-5.9984	1.99e-09	2.28e-08	g29854.t1
g20625.t1	304.116	-1.15106	0.191903	-5.99812	2e-09	2.29e-08	g20625.t1
g24382.t1	1173.14	1.54602	0.25784	5.99605	2.02e-09	2.32e-08	g24382.t1
g8017.t1	160.182	1.46518	0.244396	5.99512	2.03e-09	2.33e-08	g8017.t1
g32567.t1	2175.3	1.17865	0.196616	5.99469	2.04e-09	2.33e-08	g32567.t1
g42580.t1	59.4529	-1.89257	0.315804	-5.99285	2.06e-09	2.36e-08	g42580.t1
g2349.t1	360.294	-1.91667	0.319864	-5.99214	2.07e-09	2.37e-08	g2349.t1
g26149.t1	912.12	-1.40368	0.234277	-5.99154	2.08e-09	2.37e-08	g26149.t1
g2255.t1	381.233	-1.12252	0.187355	-5.99141	2.08e-09	2.38e-08	g2255.t1
g27224.t1	256.575	1.1117	0.185577	5.99053	2.09e-09	2.39e-08	g27224.t1
g42928.t1	359.109	-1.31613	0.219774	-5.98859	2.12e-09	2.41e-08	g42928.t1
g5219.t2	165.038	-2.77217	0.463204	-5.98476	2.17e-09	2.47e-08	g5219.t2
g25588.t1	561.955	-1.25937	0.210553	-5.98126	2.21e-09	2.52e-08	g25588.t1
g21982.t1	2830.21	1.08195	0.180899	5.98096	2.22e-09	2.52e-08	g21982.t1
g889.t1	262.946	1.22779	0.205326	5.97971	2.24e-09	2.54e-08	g889.t1
g8918.t1	1939.08	1.08298	0.181148	5.97841	2.25e-09	2.56e-08	g8918.t1
g30113.t1	9429.02	1.45538	0.243532	5.97614	2.28e-09	2.59e-08	g30113.t1
g38609.t1	461.953	-1.54396	0.258365	-5.97588	2.29e-09	2.59e-08	g38609.t1
g21222.t1	267.866	-2.0681	0.3462	-5.97372	2.32e-09	2.62e-08	g21222.t1
g41421.t1	113.746	-1.65091	0.276526	-5.97018	2.37e-09	2.68e-08	g41421.t1
g35453.t1	1079.96	-1.12579	0.188598	-5.96926	2.38e-09	2.69e-08	g35453.t1
g27228.t1	183.92	1.39787	0.23422	5.96819	2.4e-09	2.71e-08	g27228.t1
g26063.t1	453.187	1.38984	0.232997	5.96506	2.45e-09	2.76e-08	g26063.t1
g707.t1	121.261	-1.74838	0.293153	-5.96404	2.46e-09	2.78e-08	g707.t1
g26766.t1	196.455	2.04153	0.342751	5.95632	2.58e-09	2.91e-08	g26766.t1
g670.t1	826.346	-1.57026	0.26367	-5.95538	2.59e-09	2.92e-08	g670.t1
g43469.t1	1176.23	-1.16187	0.195118	-5.95471	2.61e-09	2.93e-08	g43469.t1
g23013.t1	1391.71	1.22399	0.205595	5.9534	2.63e-09	2.95e-08	g23013.t1
g21203.t1	199.447	-1.85127	0.310992	-5.95281	2.64e-09	2.96e-08	g21203.t1
g20893.t1	603.783	-1.09437	0.183865	-5.95204	2.65e-09	2.98e-08	g20893.t1
g25232.t1	195.259	1.28234	0.215468	5.95142	2.66e-09	2.99e-08	g25232.t1
g33223.t1	446.12	-1.77339	0.298034	-5.95028	2.68e-09	3.01e-08	g33223.t1
g340.t1	963.472	-1.17401	0.197436	-5.94625	2.74e-09	3.08e-08	g340.t1
g33997.t1	593.199	1.16296	0.195655	5.94391	2.78e-09	3.12e-08	g33997.t1
g951.t1	414.176	-1.12577	0.189466	-5.9418	2.82e-09	3.16e-08	g951.t1
g18533.t1	180.334	-1.23533	0.207916	-5.94149	2.82e-09	3.16e-08	g18533.t1
g26548.t1	498.105	-1.17934	0.198544	-5.93995	2.85e-09	3.19e-08	g26548.t1
g8593.t1	548.857	-1.09596	0.184604	-5.93682	2.91e-09	3.25e-08	g8593.t1
g43557.t1	675.074	1.46192	0.246292	5.9357	2.93e-09	3.27e-08	g43557.t1
g24050.t1	1295.19	-1.1853	0.199692	-5.93563	2.93e-09	3.27e-08	g24050.t1
g3948.t1	226.675	-1.11186	0.187359	-5.93441	2.95e-09	3.29e-08	g3948.t1
g44886.t1	24.9345	7.82514	1.31878	5.93363	2.96e-09	3.31e-08	g44886.t1
g11345.t1	332.736	-1.12728	0.190031	-5.9321	2.99e-09	3.33e-08	g11345.t1
g14674.t1	287.147	-1.21975	0.205891	-5.92427	3.14e-09	3.49e-08	g14674.t1
g40984.t1	152.843	-2.30085	0.388459	-5.92303	3.16e-09	3.51e-08	g40984.t1
g22431.t1	482.17	-1.0454	0.176595	-5.91977	3.22e-09	3.58e-08	g22431.t1
g11919.t1	375.816	-1.35943	0.229764	-5.91663	3.29e-09	3.65e-08	g11919.t1
g11564.t1	237.893	-1.27312	0.215456	-5.90894	3.44e-09	3.81e-08	g11564.t1
g25268.t1	19.2706	-7.97516	1.34975	-5.9086	3.45e-09	3.82e-08	g25268.t1
g14033.t1	1825.67	-1.07804	0.182462	-5.90833	3.46e-09	3.83e-08	g14033.t1
g3479.t1	321.933	-1.32228	0.223824	-5.90765	3.47e-09	3.84e-08	g3479.t1
g6151.t2	511.664	2.82128	0.477928	5.90315	3.57e-09	3.94e-08	g6151.t2
g41323.t1	2065.04	-1.17433	0.198972	-5.90198	3.59e-09	3.97e-08	g41323.t1
g25876.t1	116.014	-2.73574	0.463562	-5.90156	3.6e-09	3.98e-08	g25876.t1
g8458.t1	620.194	-1.05146	0.178206	-5.90025	3.63e-09	4.01e-08	g8458.t1
g8488.t1	198.183	-1.09458	0.185566	-5.89859	3.67e-09	4.05e-08	g8488.t1
g17864.t1	1838.54	-1.26491	0.214615	-5.89387	3.77e-09	4.16e-08	g17864.t1
g3030.t2	2085.55	-1.22134	0.207229	-5.89367	3.78e-09	4.16e-08	g3030.t2
g11310.t1	24.0327	7.77174	1.319	5.89216	3.81e-09	4.2e-08	g11310.t1
g32753.t1	265.934	-1.07242	0.182012	-5.89201	3.82e-09	4.2e-08	g32753.t1
g5684.t1	737.303	-1.25868	0.213665	-5.89088	3.84e-09	4.23e-08	g5684.t1
g26687.t1	116.535	-1.83448	0.311718	-5.88507	3.98e-09	4.37e-08	g26687.t1
g15427.t1	198.511	-1.25592	0.213459	-5.88363	4.01e-09	4.41e-08	g15427.t1
g1669.t1	4516.41	1.28175	0.217908	5.88205	4.05e-09	4.45e-08	g1669.t1
g9470.t1	141.025	-1.54496	0.262729	-5.88041	4.09e-09	4.49e-08	g9470.t1
g39941.t1	879.463	-1.05419	0.17932	-5.87881	4.13e-09	4.53e-08	g39941.t1
g13399.t1	660.675	1.23292	0.209757	5.87787	4.16e-09	4.56e-08	g13399.t1
g22647.t1	162.725	1.23557	0.210229	5.87723	4.17e-09	4.57e-08	g22647.t1
g19193.t1	1755.67	-1.43612	0.244376	-5.87667	4.19e-09	4.59e-08	g19193.t1
g28897.t1	115.105	-1.63296	0.277893	-5.87623	4.2e-09	4.59e-08	g28897.t1
g44702.t1	3360.17	-1.39528	0.237457	-5.87594	4.2e-09	4.6e-08	g44702.t1
g19741.t1	943.113	-1.29855	0.221071	-5.87392	4.26e-09	4.65e-08	g19741.t1
g16704.t1	29.0813	8.04736	1.37086	5.87029	4.35e-09	4.75e-08	g16704.t1
g43779.t2	42.6768	8.60025	1.46571	5.86763	4.42e-09	4.82e-08	g43779.t2
g28388.t1	19.0234	-7.95684	1.35633	-5.86646	4.45e-09	4.86e-08	g28388.t1
g23096.t1	183.058	-1.83104	0.312155	-5.86581	4.47e-09	4.87e-08	g23096.t1
g21326.t1	3212.47	-1.13422	0.193403	-5.86455	4.5e-09	4.91e-08	g21326.t1
g9874.t1	308.56	-1.53525	0.26179	-5.86441	4.51e-09	4.91e-08	g9874.t1
g1414.t1	99.1955	-1.64885	0.281334	-5.86084	4.61e-09	5.01e-08	g1414.t1
g16842.t1	197.461	-2.23023	0.380549	-5.86057	4.61e-09	5.02e-08	g16842.t1
g36612.t1	24.7429	-8.33719	1.42313	-5.85836	4.67e-09	5.08e-08	g36612.t1
g10900.t1	166.393	-1.38697	0.236761	-5.85808	4.68e-09	5.09e-08	g10900.t1
g33316.t1	387.696	-1.1284	0.192646	-5.85739	4.7e-09	5.11e-08	g33316.t1
g7702.t1	191.997	1.50426	0.256839	5.85683	4.72e-09	5.12e-08	g7702.t1
g35089.t1	123.997	-1.85355	0.31657	-5.85512	4.77e-09	5.17e-08	g35089.t1
g33084.t1	737.826	-2.4536	0.419221	-5.85277	4.83e-09	5.23e-08	g33084.t1
g44903.t1	197.736	-1.28685	0.219973	-5.85002	4.92e-09	5.32e-08	g44903.t1
g18600.t1	574.651	-1.39935	0.239249	-5.84894	4.95e-09	5.35e-08	g18600.t1
g30633.t1	591.471	-1.58484	0.271031	-5.84747	4.99e-09	5.4e-08	g30633.t1
g45901.t1	1921.51	-1.0464	0.178983	-5.84639	5.02e-09	5.43e-08	g45901.t1
g9944.t1	169.206	-1.86195	0.318485	-5.84626	5.03e-09	5.43e-08	g9944.t1
g4345.t1	4559.57	1.04785	0.179255	5.8456	5.05e-09	5.45e-08	g4345.t1
g18302.t1	12326.2	-1.18474	0.202695	-5.84494	5.07e-09	5.47e-08	g18302.t1
g36033.t1	265.185	1.18207	0.202332	5.84221	5.15e-09	5.56e-08	g36033.t1
g32073.t1	247.859	-1.41072	0.241476	-5.84206	5.16e-09	5.56e-08	g32073.t1
g35396.t1	25.1097	7.83513	1.34119	5.84192	5.16e-09	5.56e-08	g35396.t1
g42218.t1	4616.96	1.04465	0.17886	5.84059	5.2e-09	5.6e-08	g42218.t1
g22009.t1	539.382	-1.68653	0.288796	-5.83985	5.22e-09	5.63e-08	g22009.t1
g25739.t1	310.295	-1.44789	0.248112	-5.83564	5.36e-09	5.76e-08	g25739.t1
g11218.t1	714.118	-1.77772	0.304812	-5.83217	5.47e-09	5.88e-08	g11218.t1
g27432.t1	159.66	-1.49729	0.256728	-5.83221	5.47e-09	5.88e-08	g27432.t1
g23994.t1	75.331	4.2869	0.735371	5.82957	5.56e-09	5.97e-08	g23994.t1
g4971.t1	271.761	1.38815	0.238168	5.82845	5.59e-09	6.01e-08	g4971.t1
g320.t1	316.099	1.57723	0.27071	5.82628	5.67e-09	6.08e-08	g320.t1
g23060.t1	159.345	-1.41968	0.243667	-5.82629	5.67e-09	6.08e-08	g23060.t1
g31923.t1	466.542	-1.26532	0.217193	-5.82582	5.68e-09	6.09e-08	g31923.t1
g3725.t1	294.252	-1.28495	0.220595	-5.82491	5.71e-09	6.12e-08	g3725.t1
g38742.t1	132.505	1.74813	0.300252	5.82219	5.81e-09	6.22e-08	g38742.t1
g43387.t1	19.1447	-7.96543	1.36827	-5.82155	5.83e-09	6.24e-08	g43387.t1
[truncated: 2,209 more rows]

## Sheet: MT_vs._Mock
Table S3. DESeq2 differentially expression results for Nicotiana benthamiana transcriptomes
	baseMean	log2FoldChange	lfcSE	stat	pvalue	padj	gene
g25021.t1	2586.13	3.66898	0.125708	29.1865	2.88e-187	8.75e-183	g25021.t1
g32275.t1	3964.47	2.54876	0.0895314	28.4678	2.93e-178	4.46e-174	g32275.t1
g23644.t1	4019.52	2.22931	0.0816083	27.3172	2.65e-164	2.69e-160	g23644.t1
g44497.t1	13439.4	-2.20246	0.082241	-26.7806	5.44e-158	4.14e-154	g44497.t1
g7386.t1	3157.57	-2.55882	0.104241	-24.5471	4.64e-133	2.82e-129	g7386.t1
g2833.t1	1832.04	-1.98827	0.083517	-23.8068	2.84e-125	1.44e-121	g2833.t1
g25424.t1	3746.29	-1.88294	0.0797175	-23.6202	2.39e-123	1.04e-119	g25424.t1
g38359.t1	2000.57	2.21417	0.0950311	23.2994	4.5e-120	1.71e-116	g38359.t1
g4219.t1	1155.48	-2.43129	0.105367	-23.0746	8.33e-118	2.82e-114	g4219.t1
g38357.t1	2024.99	2.22033	0.0962443	23.0697	9.33e-118	2.84e-114	g38357.t1
g29711.t1	5410.4	2.38136	0.103775	22.9474	1.56e-116	4.32e-113	g29711.t1
g5285.t1	37266.1	-2.44697	0.108302	-22.594	4.96e-113	1.26e-109	g5285.t1
g36275.t1	1043.97	2.47419	0.110579	22.3748	6.93e-111	1.62e-107	g36275.t1
g33369.t1	18369.8	2.15357	0.0965195	22.3122	2.81e-110	6.1e-107	g33369.t1
g6884.t1	2795.06	-2.12747	0.0960421	-22.1515	1.01e-108	2.05e-105	g6884.t1
g33334.t1	1212	-2.08874	0.0950279	-21.9803	4.45e-107	8.46e-104	g33334.t1
g2717.t1	1045.19	-2.56687	0.116883	-21.961	6.8e-107	1.22e-103	g2717.t1
g23184.t1	3624.71	-2.07426	0.0949382	-21.8485	8.03e-106	1.36e-102	g23184.t1
g29747.t1	3537.42	-3.05497	0.147599	-20.6977	3.63e-95	5.81e-92	g29747.t1
g37892.t1	4174.01	-1.52727	0.0748652	-20.4003	1.66e-92	2.53e-89	g37892.t1
g41306.t1	7687.08	3.0211	0.15205	19.8691	7.53e-88	1.09e-84	g41306.t1
g19689.t1	13330.1	-2.70454	0.136349	-19.8354	1.47e-87	2.04e-84	g19689.t1
g25128.t1	1918.36	1.90198	0.0959596	19.8206	1.98e-87	2.61e-84	g25128.t1
g458.t1	5401.11	1.97807	0.100421	19.6978	2.25e-86	2.85e-83	g458.t1
g12556.t1	2027.33	-2.06246	0.10498	-19.6463	6.21e-86	7.56e-83	g12556.t1
g42383.t1	1160.25	-2.43825	0.124571	-19.5732	2.62e-85	3.06e-82	g42383.t1
g19970.t1	1313.59	-1.78689	0.0916604	-19.4946	1.22e-84	1.37e-81	g19970.t1
g37565.t1	2317.67	-1.8232	0.0940958	-19.376	1.23e-83	1.34e-80	g37565.t1
g40132.t1	2497.39	-2.72228	0.140874	-19.3242	3.36e-83	3.52e-80	g40132.t1
g23480.t1	4559.36	1.64798	0.0860158	19.159	8.14e-82	8.25e-79	g23480.t1
g24071.t1	1647.57	-1.57915	0.0831948	-18.9813	2.43e-80	2.39e-77	g24071.t1
g38854.t1	4577.89	-1.7549	0.093111	-18.8474	3.09e-79	2.93e-76	g38854.t1
g45285.t1	4914.78	-1.72596	0.0917617	-18.8091	6.36e-79	5.86e-76	g45285.t1
g42405.t1	1164.45	2.64658	0.141305	18.7296	2.84e-78	2.54e-75	g42405.t1
g43458.t1	2636.69	-1.79871	0.097863	-18.3799	1.9e-75	1.65e-72	g43458.t1
g24492.t1	6083.22	1.64837	0.0900106	18.3131	6.51e-75	5.5e-72	g24492.t1
g23643.t1	651.164	2.82796	0.154653	18.2858	1.07e-74	8.82e-72	g23643.t1
g23594.t1	4121.17	2.49701	0.136686	18.2683	1.48e-74	1.18e-71	g23594.t1
g27441.t1	30462.8	1.85465	0.101539	18.2654	1.56e-74	1.22e-71	g27441.t1
g29712.t2	7574.51	2.18489	0.120694	18.1027	3.03e-73	2.31e-70	g29712.t2
g40525.t2	1790.38	1.66431	0.0921492	18.0611	6.46e-73	4.79e-70	g40525.t2
g38990.t1	5113.63	-1.70921	0.0949156	-18.0077	1.69e-72	1.23e-69	g38990.t1
g40618.t1	1831.58	-2.24662	0.125558	-17.893	1.34e-71	9.45e-69	g40618.t1
g45947.t1	1894.5	1.7832	0.101008	17.654	9.48e-70	6.55e-67	g45947.t1
g22515.t1	6204.91	1.56034	0.0886252	17.6061	2.21e-69	1.5e-66	g22515.t1
g21518.t1	1881.85	-2.7869	0.160092	-17.4081	7.16e-68	4.73e-65	g21518.t1
g10577.t1	11467.1	-2.40355	0.138103	-17.404	7.69e-68	4.98e-65	g10577.t1
g38560.t1	7993.25	1.10692	0.0639809	17.3007	4.64e-67	2.94e-64	g38560.t1
g44752.t1	325.494	-2.92244	0.168943	-17.2984	4.84e-67	3e-64	g44752.t1
g43921.t1	11535.8	1.26892	0.0744407	17.0461	3.74e-65	2.27e-62	g43921.t1
g27393.t1	1632.27	-2.61603	0.153936	-16.9943	9.05e-65	5.4e-62	g27393.t1
g26835.t1	7192.51	1.3753	0.0809939	16.9803	1.15e-64	6.71e-62	g26835.t1
g27958.t1	6270.05	-1.84974	0.10897	-16.9748	1.26e-64	7.24e-62	g27958.t1
g8178.t1	1573.61	-1.61686	0.0955818	-16.916	3.43e-64	1.93e-61	g8178.t1
g25646.t1	3479.13	-1.13838	0.0676229	-16.8343	1.37e-63	7.56e-61	g25646.t1
g29432.t1	468.239	2.61068	0.155566	16.7818	3.32e-63	1.8e-60	g29432.t1
g2503.t1	1160.35	1.68672	0.100971	16.705	1.2e-62	6.43e-60	g2503.t1
g13096.t1	2779.38	-1.69404	0.101984	-16.6109	5.82e-62	3e-59	g13096.t1
g20279.t1	1409.94	-1.67673	0.101199	-16.5686	1.18e-61	5.96e-59	g20279.t1
g34320.t1	6650.15	-1.36832	0.0825955	-16.5665	1.22e-61	6.06e-59	g34320.t1
g14793.t1	5091.96	1.83861	0.111009	16.5628	1.3e-61	6.35e-59	g14793.t1
g3944.t1	3423.65	-1.78118	0.108436	-16.4261	1.24e-60	6e-58	g3944.t1
g27442.t1	2901.27	2.68659	0.163964	16.3853	2.44e-60	1.16e-57	g27442.t1
g26885.t2	2896.05	3.13265	0.19139	16.3679	3.24e-60	1.52e-57	g26885.t2
g36934.t1	1707.45	-2.01377	0.123068	-16.3631	3.51e-60	1.62e-57	g36934.t1
g11772.t1	26477.4	1.48855	0.0910054	16.3567	3.9e-60	1.77e-57	g11772.t1
g29874.t2	1975.07	2.96213	0.181379	16.3312	5.92e-60	2.65e-57	g29874.t2
g4095.t1	6588.27	-1.80994	0.110895	-16.3211	6.98e-60	3.08e-57	g4095.t1
g22439.t1	2593.66	-1.66221	0.101961	-16.3024	9.49e-60	4.12e-57	g22439.t1
g40092.t1	2173.35	-1.95433	0.119914	-16.2978	1.02e-59	4.39e-57	g40092.t1
g38644.t1	1139.29	3.18594	0.19639	16.2226	3.49e-59	1.48e-56	g38644.t1
g5456.t1	647.644	2.13937	0.131895	16.2202	3.63e-59	1.51e-56	g5456.t1
g23033.t1	21976.9	-1.97941	0.122063	-16.2163	3.87e-59	1.59e-56	g23033.t1
g40643.t1	3450.02	-1.46594	0.0910746	-16.096	2.72e-58	1.1e-55	g40643.t1
g10149.t1	3677.61	1.15668	0.0721556	16.0303	7.84e-58	3.14e-55	g10149.t1
g34118.t1	6578.46	1.18656	0.0740741	16.0185	9.49e-58	3.75e-55	g34118.t1
g7157.t1	1114.06	-1.62571	0.101944	-15.9471	2.98e-57	1.16e-54	g7157.t1
g12928.t1	1282.63	-2.25543	0.141458	-15.9442	3.13e-57	1.2e-54	g12928.t1
g36447.t1	643.062	2.23967	0.140647	15.924	4.32e-57	1.64e-54	g36447.t1
g33618.t1	2974.45	1.95517	0.123529	15.8277	2e-56	7.52e-54	g33618.t1
g184.t1	2216.52	-1.79738	0.113735	-15.8032	2.96e-56	1.1e-53	g184.t1
g7241.t1	747.234	-2.06315	0.130699	-15.7855	3.91e-56	1.43e-53	g7241.t1
g27394.t1	3063.28	-2.36533	0.150184	-15.7495	6.92e-56	2.5e-53	g27394.t1
g23979.t1	1818.65	-2.10241	0.133536	-15.7441	7.54e-56	2.7e-53	g23979.t1
g30631.t1	5003.1	-1.39416	0.0887488	-15.7091	1.31e-55	4.64e-53	g30631.t1
g13539.t1	3982.11	1.79863	0.114643	15.689	1.8e-55	6.29e-53	g13539.t1
g40683.t1	441.503	-2.33651	0.149129	-15.6677	2.52e-55	8.69e-53	g40683.t1
g3298.t1	9961.16	-1.36384	0.0870526	-15.6669	2.55e-55	8.71e-53	g3298.t1
g24753.t1	874.235	2.07256	0.132486	15.6436	3.67e-55	1.24e-52	g24753.t1
g23445.t1	4017.63	-1.63177	0.104328	-15.6408	3.84e-55	1.28e-52	g23445.t1
g12617.t1	264.01	-2.75677	0.176742	-15.5977	7.55e-55	2.49e-52	g12617.t1
g10953.t1	3645.61	1.19813	0.076822	15.5961	7.73e-55	2.53e-52	g10953.t1
g17678.t1	1619.6	-1.63879	0.105195	-15.5787	1.02e-54	3.29e-52	g17678.t1
g34062.t1	6643.58	-1.32988	0.0856253	-15.5314	2.13e-54	6.81e-52	g34062.t1
g30738.t1	7756.41	-1.31759	0.0850354	-15.4946	3.77e-54	1.2e-51	g30738.t1
g31958.t1	2137.58	-1.47225	0.0953751	-15.4364	9.32e-54	2.92e-51	g31958.t1
g16589.t1	610.471	2.60717	0.168933	15.4332	9.79e-54	3.04e-51	g16589.t1
g2486.t1	6936.35	-1.94766	0.126309	-15.4198	1.2e-53	3.66e-51	g2486.t1
g29875.t2	2402.92	-1.59108	0.103183	-15.4201	1.2e-53	3.66e-51	g29875.t2
g41005.t1	486.239	-1.98986	0.129697	-15.3424	3.98e-53	1.2e-50	g41005.t1
g26316.t1	542.972	2.19796	0.143582	15.3081	6.76e-53	2.01e-50	g26316.t1
g22819.t1	395.235	-3.49466	0.228436	-15.2982	7.86e-53	2.32e-50	g22819.t1
g2856.t1	41966	2.40789	0.157892	15.2503	1.64e-52	4.79e-50	g2856.t1
g23634.t1	26349.6	2.37674	0.156058	15.2298	2.24e-52	6.49e-50	g23634.t1
g33763.t1	4107.91	-2.56531	0.168947	-15.1841	4.51e-52	1.29e-49	g33763.t1
g10193.t1	2839.26	-1.60453	0.10603	-15.1328	9.84e-52	2.8e-49	g10193.t1
g14750.t1	3893.97	-1.30142	0.0864009	-15.0626	2.85e-51	8.03e-49	g14750.t1
g32173.t1	4167.6	-1.04048	0.0691982	-15.0363	4.25e-51	1.18e-48	g32173.t1
g1014.t1	1636.33	-1.88685	0.125711	-15.0094	6.37e-51	1.76e-48	g1014.t1
g8494.t1	2034.43	-1.46386	0.0977358	-14.9777	1.03e-50	2.81e-48	g8494.t1
g1425.t1	2630.73	-1.70713	0.11401	-14.9735	1.09e-50	2.97e-48	g1425.t1
g41718.t1	1170.62	1.73738	0.116136	14.9598	1.34e-50	3.62e-48	g41718.t1
g11399.t1	1912.49	1.35766	0.0907732	14.9566	1.41e-50	3.76e-48	g11399.t1
g29748.t1	1013.16	-2.53542	0.169623	-14.9474	1.62e-50	4.28e-48	g29748.t1
g8311.t1	15240.1	1.69141	0.113567	14.8935	3.63e-50	9.52e-48	g8311.t1
g28514.t1	1908.14	-1.9225	0.129119	-14.8894	3.86e-50	1e-47	g28514.t1
g21735.t1	2131.18	-1.15574	0.0777119	-14.8721	5e-50	1.29e-47	g21735.t1
g28821.t1	12924.4	1.19502	0.0805563	14.8345	8.76e-50	2.24e-47	g28821.t1
g12677.t1	1463.04	-1.75039	0.118275	-14.7994	1.48e-49	3.75e-47	g12677.t1
g32087.t1	4620.18	-1.39128	0.0940236	-14.7971	1.53e-49	3.84e-47	g32087.t1
g33831.t1	2303.36	-1.60866	0.109028	-14.7546	2.87e-49	7.16e-47	g33831.t1
g19082.t1	4820.46	-1.90883	0.129549	-14.7344	3.87e-49	9.57e-47	g19082.t1
g42395.t1	1401.86	-2.47343	0.167872	-14.734	3.9e-49	9.57e-47	g42395.t1
g17336.t1	1948.84	-1.44118	0.0978359	-14.7305	4.1e-49	9.99e-47	g17336.t1
g14742.t1	7299.84	-1.58507	0.107657	-14.7233	4.57e-49	1.1e-46	g14742.t1
g27444.t1	10529.7	2.09283	0.142488	14.6878	7.72e-49	1.85e-46	g27444.t1
g21913.t1	11527	1.42979	0.097972	14.5939	3.07e-48	7.3e-46	g21913.t1
g11209.t1	622.827	2.02495	0.139225	14.5444	6.34e-48	1.49e-45	g11209.t1
g36625.t1	1772.14	-1.95137	0.13427	-14.5332	7.47e-48	1.75e-45	g36625.t1
g6924.t1	15587.7	1.83603	0.126664	14.4953	1.3e-47	3.01e-45	g6924.t1
g35492.t1	1463.7	-2.28313	0.157567	-14.4898	1.4e-47	3.24e-45	g35492.t1
g978.t1	861.689	-2.00157	0.138842	-14.4161	4.1e-47	9.37e-45	g978.t1
g14532.t1	595.116	-2.01864	0.140527	-14.3648	8.6e-47	1.95e-44	g14532.t1
g7314.t1	2685.72	-2.13531	0.14866	-14.3637	8.75e-47	1.97e-44	g7314.t1
g16995.t1	2039.64	-1.16399	0.0810807	-14.356	9.77e-47	2.19e-44	g16995.t1
g1163.t1	6742.5	-1.04577	0.0729493	-14.3355	1.31e-46	2.91e-44	g1163.t1
g41061.t1	1371.44	1.46479	0.102305	14.3179	1.69e-46	3.73e-44	g41061.t1
g3312.t1	3220.25	1.09627	0.0766595	14.3005	2.17e-46	4.75e-44	g3312.t1
g33908.t1	784.022	1.69788	0.119025	14.2649	3.62e-46	7.87e-44	g33908.t1
g41206.t1	2032.31	-2.07467	0.145491	-14.2597	3.9e-46	8.41e-44	g41206.t1
g43847.t1	1520.01	-1.96843	0.138368	-14.226	6.32e-46	1.35e-43	g43847.t1
g15212.t1	2165.74	-2.10784	0.14825	-14.2181	7.07e-46	1.5e-43	g15212.t1
g22793.t1	3626.84	-2.61621	0.184075	-14.2127	7.64e-46	1.61e-43	g22793.t1
g9257.t1	629.48	1.7591	0.123999	14.1864	1.11e-45	2.33e-43	g9257.t1
g21957.t1	4717.39	-2.04495	0.144346	-14.167	1.47e-45	3.05e-43	g21957.t1
g1084.t1	3280.06	-1.57253	0.111209	-14.1403	2.14e-45	4.43e-43	g1084.t1
g18472.t1	957.115	1.41718	0.100572	14.0911	4.31e-45	8.76e-43	g18472.t1
g34059.t1	10597.2	-1.52321	0.108098	-14.0909	4.32e-45	8.76e-43	g34059.t1
g44036.t1	892.893	-2.48881	0.176624	-14.091	4.32e-45	8.76e-43	g44036.t1
g1637.t1	300.899	2.61611	0.186634	14.0173	1.22e-44	2.46e-42	g1637.t1
g39268.t1	1741.49	-1.52079	0.108582	-14.0059	1.43e-44	2.87e-42	g39268.t1
g15747.t1	2429.01	1.40039	0.100177	13.9792	2.09e-44	4.15e-42	g15747.t1
g37847.t1	1305.63	-2.28871	0.163902	-13.9639	2.59e-44	5.11e-42	g37847.t1
g42520.t1	5527.45	-1.01132	0.0726334	-13.9236	4.55e-44	8.93e-42	g42520.t1
g38155.t1	879.868	-1.63285	0.117359	-13.9133	5.26e-44	1.03e-41	g38155.t1
g6253.t1	5224.79	1.12083	0.0805655	13.912	5.36e-44	1.04e-41	g6253.t1
g21305.t1	2460.77	-1.03026	0.0740702	-13.9092	5.57e-44	1.07e-41	g21305.t1
g5750.t1	366.708	2.32444	0.167747	13.8569	1.16e-43	2.21e-41	g5750.t1
g9852.t1	947.814	-1.66927	0.120487	-13.8544	1.2e-43	2.28e-41	g9852.t1
g23727.t1	802.723	-1.97411	0.142685	-13.8355	1.56e-43	2.94e-41	g23727.t1
g5459.t1	3515.24	2.30441	0.16665	13.8279	1.73e-43	3.25e-41	g5459.t1
g2671.t1	652.196	-1.62196	0.11734	-13.8227	1.86e-43	3.47e-41	g2671.t1
g32195.t1	7930.17	-1.24026	0.090251	-13.7424	5.66e-43	1.05e-40	g32195.t1
g26744.t1	570.55	-2.69527	0.196354	-13.7266	7.04e-43	1.3e-40	g26744.t1
g45050.t1	2728.63	-2.08821	0.152219	-13.7184	7.87e-43	1.44e-40	g45050.t1
g44195.t1	705.5	-1.64838	0.120326	-13.6993	1.03e-42	1.87e-40	g44195.t1
g1527.t1	5580.51	1.11153	0.0811706	13.6938	1.11e-42	2e-40	g1527.t1
g40273.t1	966.592	-1.42879	0.104352	-13.692	1.13e-42	2.04e-40	g40273.t1
g6333.t1	4940.89	-1.86341	0.136238	-13.6776	1.38e-42	2.47e-40	g6333.t1
g9517.t1	3351.08	-1.47964	0.108203	-13.6746	1.44e-42	2.56e-40	g9517.t1
g31631.t1	1992.53	1.23281	0.0901825	13.6702	1.53e-42	2.7e-40	g31631.t1
g3139.t1	325.168	-2.41122	0.176483	-13.6626	1.7e-42	2.99e-40	g3139.t1
g27033.t1	379.81	-2.5053	0.183411	-13.6595	1.77e-42	3.1e-40	g27033.t1
g26768.t1	1446.35	-1.15709	0.0847731	-13.6493	2.04e-42	3.54e-40	g26768.t1
g39053.t1	977.666	-1.45206	0.106427	-13.6437	2.2e-42	3.8e-40	g39053.t1
g18545.t1	761.279	-2.4291	0.178147	-13.6353	2.47e-42	4.24e-40	g18545.t1
g25634.t1	2546.43	-1.40059	0.102721	-13.635	2.48e-42	4.24e-40	g25634.t1
g26646.t1	11475.2	-1.83988	0.135022	-13.6265	2.79e-42	4.73e-40	g26646.t1
g18641.t1	3299.98	-1.17292	0.0863927	-13.5766	5.51e-42	9.31e-40	g18641.t1
g10624.t1	4673.77	-1.38409	0.102081	-13.5587	7.03e-42	1.18e-39	g10624.t1
g43686.t1	713.236	1.59175	0.117436	13.5542	7.48e-42	1.25e-39	g43686.t1
g6157.t1	10127.9	1.38958	0.102539	13.5518	7.73e-42	1.28e-39	g6157.t1
g1190.t1	3201.49	-1.51223	0.111781	-13.5285	1.06e-41	1.76e-39	g1190.t1
g2062.t1	3095.39	-1.97188	0.145797	-13.5248	1.12e-41	1.83e-39	g2062.t1
g30805.t1	967.138	1.48537	0.109952	13.5092	1.38e-41	2.26e-39	g30805.t1
g9414.t1	781.364	-1.56359	0.115889	-13.4921	1.74e-41	2.83e-39	g9414.t1
g26720.t1	2940.18	-1.66673	0.123614	-13.4834	1.96e-41	3.17e-39	g26720.t1
g20623.t1	5310.12	-1.86751	0.138517	-13.4822	1.99e-41	3.2e-39	g20623.t1
g2525.t1	1827	-1.65323	0.122747	-13.4686	2.39e-41	3.81e-39	g2525.t1
g23578.t1	232.087	3.24429	0.241898	13.4118	5.16e-41	8.17e-39	g23578.t1
g4652.t1	28540.2	-1.55724	0.116164	-13.4056	5.61e-41	8.83e-39	g4652.t1
g16518.t1	1286.81	-2.28211	0.170281	-13.402	5.88e-41	9.18e-39	g16518.t1
g41131.t1	1319.28	-1.31843	0.0984955	-13.3856	7.34e-41	1.14e-38	g41131.t1
g17912.t1	770.808	-1.59892	0.119903	-13.3351	1.45e-40	2.23e-38	g17912.t1
g12815.t1	4961.46	-1.55105	0.116355	-13.3304	1.54e-40	2.37e-38	g12815.t1
g15205.t1	5899.46	-1.15063	0.0863714	-13.3218	1.73e-40	2.64e-38	g15205.t1
g3101.t1	2515.37	-1.76904	0.132848	-13.3163	1.86e-40	2.83e-38	g3101.t1
g5395.t1	4306.28	-1.41592	0.106463	-13.2997	2.32e-40	3.52e-38	g5395.t1
g18426.t1	6146.91	-1.57192	0.118232	-13.2953	2.47e-40	3.71e-38	g18426.t1
g1871.t1	1568.7	-1.55268	0.117225	-13.2452	4.81e-40	7.17e-38	g1871.t1
g10726.t1	1276.7	-1.8317	0.138525	-13.2229	6.47e-40	9.6e-38	g10726.t1
g26265.t1	1480.32	-1.49574	0.113207	-13.2124	7.44e-40	1.1e-37	g26265.t1
g6073.t1	2165.77	1.11417	0.0845124	13.1835	1.09e-39	1.6e-37	g6073.t1
g2198.t1	1754.33	-1.85248	0.140746	-13.1618	1.46e-39	2.13e-37	g2198.t1
g12356.t1	1613.99	-1.09543	0.0832837	-13.1531	1.63e-39	2.38e-37	g12356.t1
g45420.t1	2503.2	1.37109	0.104403	13.1326	2.14e-39	3.1e-37	g45420.t1
g36271.t1	1085.85	-1.39698	0.106484	-13.1192	2.56e-39	3.69e-37	g36271.t1
g12022.t1	10247	1.41237	0.107747	13.1081	2.96e-39	4.24e-37	g12022.t1
g23950.t1	2495.26	-2.42984	0.185919	-13.0693	4.93e-39	7.04e-37	g23950.t1
g20148.t1	2313.25	1.37877	0.105614	13.0548	5.97e-39	8.48e-37	g20148.t1
g41042.t1	1933.11	1.55942	0.119525	13.0468	6.63e-39	9.38e-37	g41042.t1
g529.t1	2237.17	-2.177	0.166918	-13.0423	7.03e-39	9.89e-37	g529.t1
g30878.t1	986.74	-2.22396	0.170581	-13.0376	7.48e-39	1.05e-36	g30878.t1
g15258.t1	1734	-1.3396	0.102928	-13.015	1.01e-38	1.4e-36	g15258.t1
g20777.t1	3272.74	1.19493	0.0919281	12.9985	1.25e-38	1.73e-36	g20777.t1
g2923.t1	994.979	-1.52407	0.117266	-12.9967	1.28e-38	1.76e-36	g2923.t1
g6772.t1	624.806	-1.83837	0.141707	-12.9731	1.74e-38	2.39e-36	g6772.t1
g3619.t1	1177.49	-2.42719	0.187199	-12.9658	1.91e-38	2.62e-36	g3619.t1
g31463.t1	1549.03	-1.60759	0.123989	-12.9656	1.92e-38	2.62e-36	g31463.t1
g37770.t1	9058.04	-2.80697	0.216603	-12.959	2.09e-38	2.84e-36	g37770.t1
g24974.t1	1491.71	-2.69849	0.208643	-12.9335	2.91e-38	3.94e-36	g24974.t1
g43660.t1	3876.83	-1.62138	0.125708	-12.898	4.62e-38	6.22e-36	g43660.t1
g30760.t1	585.448	-1.69458	0.13158	-12.8787	5.94e-38	7.95e-36	g30760.t1
g30137.t1	3357.27	-1.00083	0.0777538	-12.8718	6.49e-38	8.65e-36	g30137.t1
g22326.t1	1252.81	-2.15349	0.167517	-12.8554	8.02e-38	1.07e-35	g22326.t1
g40806.t1	1332.23	1.62308	0.126394	12.8414	9.61e-38	1.27e-35	g40806.t1
g19987.t1	11903.1	3.07443	0.239768	12.8225	1.23e-37	1.61e-35	g19987.t1
g8968.t1	2512.73	-1.0997	0.086054	-12.7792	2.14e-37	2.8e-35	g8968.t1
g7190.t1	529.194	2.30184	0.180205	12.7735	2.31e-37	3e-35	g7190.t1
g43668.t1	616.289	1.43371	0.11226	12.7712	2.37e-37	3.07e-35	g43668.t1
g34243.t1	2095.23	-1.17835	0.0923061	-12.7656	2.55e-37	3.29e-35	g34243.t1
g29505.t1	5061.59	-1.59035	0.124662	-12.7573	2.84e-37	3.64e-35	g29505.t1
g28105.t1	1951.22	-1.45213	0.114019	-12.7359	3.73e-37	4.77e-35	g28105.t1
g4523.t1	441.174	-1.96224	0.15416	-12.7286	4.1e-37	5.22e-35	g4523.t1
g17799.t1	1687.41	-2.10288	0.165392	-12.7145	4.91e-37	6.23e-35	g17799.t1
g8145.t1	3110.46	-1.37144	0.107985	-12.7003	5.89e-37	7.4e-35	g8145.t1
g25630.t1	10098.1	-2.33792	0.184081	-12.7005	5.88e-37	7.4e-35	g25630.t1
g26568.t1	2728.06	-1.71695	0.135301	-12.6899	6.73e-37	8.42e-35	g26568.t1
g18681.t1	11959.2	-1.10148	0.0868088	-12.6886	6.84e-37	8.52e-35	g18681.t1
g20286.t1	1090.1	-1.21746	0.0960026	-12.6815	7.49e-37	9.29e-35	g20286.t1
g32724.t1	1597.86	-1.40317	0.110651	-12.681	7.53e-37	9.31e-35	g32724.t1
g10660.t1	1276.58	-1.41447	0.1116	-12.6744	8.2e-37	1.01e-34	g10660.t1
g39566.t1	1833.67	-2.91354	0.230332	-12.6493	1.13e-36	1.38e-34	g39566.t1
g9643.t1	1991.53	-1.21773	0.0963893	-12.6334	1.38e-36	1.69e-34	g9643.t1
g46090.t1	1089.07	-2.3029	0.183314	-12.5626	3.39e-36	4.13e-34	g46090.t1
g46036.t1	1088.57	-2.3034	0.183379	-12.5609	3.46e-36	4.2e-34	g46036.t1
g9164.t1	693.094	1.61814	0.128927	12.5508	3.93e-36	4.75e-34	g9164.t1
g17682.t1	1026.04	-1.40248	0.111747	-12.5504	3.95e-36	4.75e-34	g17682.t1
g8772.t1	3085.92	-1.03708	0.0829636	-12.5005	7.42e-36	8.89e-34	g8772.t1
g8169.t1	3554.74	-1.01985	0.0816181	-12.4954	7.91e-36	9.44e-34	g8169.t1
g21871.t1	3127.56	-1.07335	0.0859186	-12.4927	8.18e-36	9.72e-34	g21871.t1
g44598.t1	1169.07	-1.1369	0.091019	-12.4908	8.38e-36	9.91e-34	g44598.t1
g8708.t1	986.706	-1.4358	0.115113	-12.4729	1.05e-35	1.24e-33	g8708.t1
g30166.t1	1076.04	-1.35965	0.109077	-12.465	1.16e-35	1.36e-33	g30166.t1
g6878.t1	1617.67	-1.40528	0.11284	-12.4537	1.33e-35	1.56e-33	g6878.t1
g23613.t1	1019.5	-1.66715	0.134036	-12.4381	1.62e-35	1.89e-33	g23613.t1
g26929.t1	1053.73	-1.33228	0.107133	-12.4357	1.67e-35	1.94e-33	g26929.t1
g4950.t1	2240.34	-1.29193	0.103917	-12.4323	1.74e-35	2.02e-33	g4950.t1
g38386.t1	612.709	-2.93845	0.236628	-12.418	2.09e-35	2.4e-33	g38386.t1
g6135.t1	3582.41	-1.49616	0.120566	-12.4095	2.32e-35	2.66e-33	g6135.t1
g34641.t1	1403.08	1.86036	0.149976	12.4044	2.47e-35	2.83e-33	g34641.t1
g7443.t1	497.442	-1.88153	0.152067	-12.373	3.66e-35	4.17e-33	g7443.t1
g10421.t1	2733.96	-1.44394	0.116847	-12.3576	4.43e-35	5.03e-33	g10421.t1
g28097.t1	1764.81	-1.4244	0.115389	-12.3444	5.22e-35	5.9e-33	g28097.t1
g20504.t2	1634.03	1.79368	0.145666	12.3137	7.65e-35	8.58e-33	g20504.t2
g29615.t1	1412.29	-1.29443	0.10512	-12.3139	7.63e-35	8.58e-33	g29615.t1
g6441.t1	2001.11	-1.85653	0.151129	-12.2845	1.1e-34	1.23e-32	g6441.t1
g1717.t1	3463.63	-2.56992	0.209273	-12.2802	1.16e-34	1.29e-32	g1717.t1
g24476.t1	675.171	-1.61221	0.131429	-12.2667	1.37e-34	1.52e-32	g24476.t1
g25746.t1	1991.18	1.21762	0.0992743	12.2653	1.39e-34	1.54e-32	g25746.t1
g15946.t1	2679.51	-1.6353	0.133445	-12.2544	1.59e-34	1.75e-32	g15946.t1
g23635.t1	26900.1	2.56709	0.210421	12.1998	3.12e-34	3.42e-32	g23635.t1
g12061.t1	1681.3	-1.50041	0.123006	-12.1978	3.19e-34	3.49e-32	g12061.t1
g23630.t1	33699.2	2.03518	0.166852	12.1975	3.2e-34	3.49e-32	g23630.t1
g35890.t1	1615.62	-1.2917	0.106027	-12.1827	3.84e-34	4.17e-32	g35890.t1
g7362.t1	10017.5	-1.89727	0.156382	-12.1323	7.12e-34	7.71e-32	g7362.t1
g27906.t1	1845.86	-1.32717	0.109464	-12.1242	7.86e-34	8.47e-32	g27906.t1
g29712.t1	3610.56	3.32668	0.274834	12.1043	1e-33	1.08e-31	g29712.t1
g46206.t1	1555.69	-1.43491	0.118858	-12.0724	1.48e-33	1.58e-31	g46206.t1
g14727.t1	3002.19	1.1659	0.0969528	12.0254	2.61e-33	2.78e-31	g14727.t1
g45141.t1	2833.41	-1.59305	0.132545	-12.019	2.82e-33	2.99e-31	g45141.t1
g2371.t1	3175.3	-1.43785	0.119834	-11.9986	3.61e-33	3.8e-31	g2371.t1
g46107.t1	969.346	-1.76196	0.146846	-11.9987	3.61e-33	3.8e-31	g46107.t1
g21307.t1	1825.76	-1.31524	0.109624	-11.9977	3.65e-33	3.83e-31	g21307.t1
g44680.t1	4407.75	-1.66019	0.138563	-11.9815	4.44e-33	4.64e-31	g44680.t1
g2100.t1	488.588	-2.975	0.248396	-11.9769	4.7e-33	4.89e-31	g2100.t1
g36513.t1	2641.27	-2.33702	0.19549	-11.9547	6.14e-33	6.37e-31	g36513.t1
g22891.t1	1362.73	-1.35406	0.113519	-11.9281	8.45e-33	8.72e-31	g22891.t1
g32032.t1	676.351	-2.83239	0.237458	-11.928	8.46e-33	8.72e-31	g32032.t1
g671.t1	1519.13	-1.36458	0.114606	-11.9066	1.09e-32	1.12e-30	g671.t1
g5617.t1	552.028	2.17653	0.183054	11.8901	1.33e-32	1.36e-30	g5617.t1
g4978.t1	3376.45	-1.80986	0.152272	-11.8857	1.4e-32	1.43e-30	g4978.t1
g6355.t1	1223.55	-1.2956	0.109028	-11.8832	1.45e-32	1.47e-30	g6355.t1
g8677.t1	315.411	-1.95788	0.164963	-11.8686	1.72e-32	1.74e-30	g8677.t1
g16317.t1	3876.47	-1.3715	0.115571	-11.8672	1.75e-32	1.76e-30	g16317.t1
g46204.t1	1497.28	-1.41323	0.119107	-11.8652	1.79e-32	1.8e-30	g46204.t1
g44210.t1	4504.25	1.12775	0.0951307	11.8548	2.03e-32	2.03e-30	g44210.t1
g29607.t1	7585.27	-1.14312	0.0964407	-11.8531	2.07e-32	2.07e-30	g29607.t1
g30948.t1	3257.6	-1.31059	0.110672	-11.8421	2.37e-32	2.35e-30	g30948.t1
g27140.t2	4993.01	-1.38173	0.116792	-11.8307	2.71e-32	2.68e-30	g27140.t2
g17651.t1	2236.44	-1.16013	0.0981982	-11.8142	3.3e-32	3.26e-30	g17651.t1
g29995.t1	2834.23	-1.6166	0.13688	-11.8103	3.45e-32	3.4e-30	g29995.t1
g6434.t1	4381.68	-1.83813	0.155647	-11.8096	3.48e-32	3.41e-30	g6434.t1
g6980.t1	2396.04	-2.57673	0.218246	-11.8065	3.61e-32	3.53e-30	g6980.t1
g26643.t1	792.533	-1.47511	0.124954	-11.8052	3.67e-32	3.58e-30	g26643.t1
g20956.t1	752.795	1.73204	0.147147	11.7709	5.52e-32	5.36e-30	g20956.t1
g38081.t1	2128.88	-1.56022	0.132592	-11.767	5.77e-32	5.59e-30	g38081.t1
g36972.t1	3231.36	-1.48651	0.126426	-11.7579	6.43e-32	6.21e-30	g36972.t1
g39758.t1	3104.28	1.12464	0.0956992	11.7518	6.91e-32	6.65e-30	g39758.t1
g4018.t1	2152.73	1.17161	0.0998257	11.7365	8.28e-32	7.92e-30	g4018.t1
g31645.t1	3200.9	1.51321	0.12906	11.7248	9.51e-32	9.06e-30	g31645.t1
g5684.t1	682.312	-1.605	0.137009	-11.7146	1.07e-31	1.02e-29	g5684.t1
g29716.t2	656.627	-1.71579	0.146721	-11.6943	1.36e-31	1.29e-29	g29716.t2
g28980.t1	1594.79	-1.38704	0.118817	-11.6738	1.74e-31	1.63e-29	g28980.t1
g18189.t1	18687.5	-1.28016	0.109787	-11.6605	2.03e-31	1.89e-29	g18189.t1
g27146.t1	673.167	-1.54039	0.132159	-11.6556	2.15e-31	2e-29	g27146.t1
g36117.t1	1883.48	-1.3252	0.113752	-11.6499	2.3e-31	2.13e-29	g36117.t1
g11786.t1	2328.31	-1.0927	0.0938098	-11.648	2.35e-31	2.17e-29	g11786.t1
g4276.t1	918.925	-2.1473	0.18436	-11.6473	2.37e-31	2.18e-29	g4276.t1
g20195.t1	1109.45	-1.56922	0.134991	-11.6246	3.09e-31	2.84e-29	g20195.t1
g3779.t1	930.795	-1.55911	0.134349	-11.6049	3.89e-31	3.56e-29	g3779.t1
g8523.t1	1658.37	-1.34023	0.115512	-11.6025	4e-31	3.65e-29	g8523.t1
g2629.t1	798.946	-1.29416	0.111721	-11.5839	4.97e-31	4.53e-29	g2629.t1
g31065.t1	1012.44	-1.28493	0.110957	-11.5805	5.18e-31	4.7e-29	g31065.t1
g20504.t1	2823.02	1.61266	0.139407	11.568	5.99e-31	5.4e-29	g20504.t1
g11657.t1	1236.03	-1.36373	0.118017	-11.5553	6.94e-31	6.24e-29	g11657.t1
g29682.t1	1248.08	-1.56307	0.135377	-11.546	7.73e-31	6.94e-29	g29682.t1
g5243.t1	6623.98	-1.03094	0.0893206	-11.542	8.1e-31	7.24e-29	g5243.t1
g40525.t1	1301.72	1.72497	0.149473	11.5404	8.26e-31	7.36e-29	g40525.t1
g34068.t1	2768.23	-1.25747	0.109073	-11.5287	9.46e-31	8.41e-29	g34068.t1
g20059.t1	3099.35	-1.31092	0.113749	-11.5247	9.9e-31	8.78e-29	g20059.t1
g27443.t1	5680.87	1.89478	0.164698	11.5046	1.25e-30	1.11e-28	g27443.t1
g2866.t1	4037.07	1.06469	0.0926589	11.4905	1.47e-30	1.3e-28	g2866.t1
g36305.t1	14285.9	-1.37201	0.119484	-11.4827	1.61e-30	1.42e-28	g36305.t1
g8892.t1	1412.52	-1.53508	0.133771	-11.4754	1.75e-30	1.54e-28	g8892.t1
g3050.t1	5171.12	-1.69254	0.147579	-11.4687	1.89e-30	1.66e-28	g3050.t1
g4340.t1	2519.27	-2.23951	0.195399	-11.4613	2.07e-30	1.8e-28	g4340.t1
g1236.t1	1108.86	-1.12671	0.0983304	-11.4584	2.13e-30	1.85e-28	g1236.t1
g29784.t1	3080.74	-1.45802	0.127264	-11.4567	2.18e-30	1.89e-28	g29784.t1
g20056.t1	2051.6	-1.49031	0.13011	-11.4542	2.24e-30	1.93e-28	g20056.t1
g12056.t1	1610.84	-1.77231	0.1549	-11.4416	2.59e-30	2.23e-28	g12056.t1
g15113.t1	1946.53	-1.15763	0.101399	-11.4166	3.46e-30	2.96e-28	g15113.t1
g34663.t1	735.495	1.7088	0.149714	11.4138	3.57e-30	3.05e-28	g34663.t1
g33201.t1	1019.6	-1.44331	0.126571	-11.4032	4.03e-30	3.43e-28	g33201.t1
g3211.t1	712.598	-1.46716	0.128779	-11.3928	4.54e-30	3.84e-28	g3211.t1
g8579.t1	468.466	-1.94254	0.170661	-11.3824	5.11e-30	4.31e-28	g8579.t1
g38109.t1	3994	1.92073	0.168796	11.379	5.32e-30	4.47e-28	g38109.t1
g38489.t1	13214.4	1.67038	0.14684	11.3755	5.54e-30	4.64e-28	g38489.t1
g1672.t1	2104.77	-2.1221	0.186724	-11.3649	6.26e-30	5.23e-28	g1672.t1
g31919.t1	280.483	-2.59332	0.228363	-11.3561	6.91e-30	5.76e-28	g31919.t1
g40807.t1	1723.05	1.83618	0.161724	11.3538	7.1e-30	5.9e-28	g40807.t1
g6905.t1	9338.41	-1.26523	0.111518	-11.3456	7.8e-30	6.46e-28	g6905.t1
g35113.t1	1969.9	-1.39569	0.123026	-11.3446	7.88e-30	6.52e-28	g35113.t1
g18672.t1	21370.6	1.69803	0.149761	11.3383	8.48e-30	6.99e-28	g18672.t1
g35863.t1	8314.59	-1.50373	0.13272	-11.3301	9.31e-30	7.65e-28	g35863.t1
g8955.t1	304.136	2.78093	0.24559	11.3235	1e-29	8.23e-28	g8955.t1
g25005.t1	648.981	-1.94665	0.171997	-11.3179	1.07e-29	8.75e-28	g25005.t1
g24567.t1	601.122	-1.85771	0.164165	-11.3161	1.09e-29	8.9e-28	g24567.t1
g29864.t1	7622.17	-2.30492	0.203782	-11.3107	1.16e-29	9.44e-28	g29864.t1
g15204.t1	8613.45	-1.47636	0.130632	-11.3017	1.29e-29	1.04e-27	g15204.t1
g11204.t1	3468.68	1.06604	0.0946468	11.2633	1.99e-29	1.6e-27	g11204.t1
g29420.t1	950.27	-1.71384	0.152578	-11.2326	2.82e-29	2.26e-27	g29420.t1
g11510.t1	468.636	-2.10125	0.187204	-11.2244	3.1e-29	2.48e-27	g11510.t1
g21463.t1	2874.1	-1.36493	0.121866	-11.2002	4.07e-29	3.24e-27	g21463.t1
g39292.t1	1879.75	-1.95395	0.174558	-11.1937	4.38e-29	3.48e-27	g39292.t1
g17029.t1	1155.28	-2.32317	0.207655	-11.1877	4.69e-29	3.71e-27	g17029.t1
g41958.t1	942.278	-1.44383	0.129068	-11.1866	4.74e-29	3.74e-27	g41958.t1
g43064.t1	311.75	-2.13235	0.190813	-11.175	5.4e-29	4.26e-27	g43064.t1
g4266.t1	988.62	-1.18445	0.106133	-11.1601	6.4e-29	5.02e-27	g4266.t1
g29874.t1	19641	1.99902	0.179159	11.1578	6.56e-29	5.14e-27	g29874.t1
g28113.t1	2029.24	-1.5343	0.137528	-11.1563	6.67e-29	5.21e-27	g28113.t1
g26159.t1	1006.64	-1.40246	0.125887	-11.1406	7.95e-29	6.2e-27	g26159.t1
g14251.t1	1114.18	-1.79806	0.161558	-11.1295	9.02e-29	7.01e-27	g14251.t1
g27528.t1	1069.65	-1.61425	0.145222	-11.1157	1.05e-28	8.14e-27	g27528.t1
g11984.t2	424.938	3.28954	0.296135	11.1083	1.14e-28	8.83e-27	g11984.t2
g17966.t1	1847.86	1.16614	0.105028	11.1032	1.21e-28	9.32e-27	g17966.t1
g18657.t1	994.63	-1.60995	0.145016	-11.1019	1.23e-28	9.43e-27	g18657.t1
g43800.t1	976.632	-1.73022	0.155917	-11.0971	1.3e-28	9.93e-27	g43800.t1
g9892.t1	1104.7	-1.6585	0.149476	-11.0955	1.32e-28	1.01e-26	g9892.t1
g45787.t1	19264.1	-1.19055	0.107435	-11.0816	1.54e-28	1.17e-26	g45787.t1
g24095.t1	3153.19	-1.17004	0.105591	-11.0808	1.55e-28	1.18e-26	g24095.t1
g23984.t1	1048.5	2.28953	0.207038	11.0585	1.99e-28	1.5e-26	g23984.t1
g13872.t1	1652.29	-1.56417	0.14148	-11.0558	2.05e-28	1.54e-26	g13872.t1
g26278.t1	4997.05	-1.50677	0.13643	-11.0443	2.34e-28	1.75e-26	g26278.t1
g43279.t1	1733.08	-1.69602	0.153655	-11.0379	2.51e-28	1.87e-26	g43279.t1
g45758.t1	346.041	1.86015	0.168538	11.037	2.53e-28	1.89e-26	g45758.t1
g24865.t2	694.286	-1.92112	0.174102	-11.0344	2.61e-28	1.94e-26	g24865.t2
g20706.t1	3197.48	-1.48141	0.13457	-11.0085	3.48e-28	2.57e-26	g20706.t1
g39152.t1	956.42	-1.29292	0.117494	-11.0041	3.65e-28	2.69e-26	g39152.t1
g6889.t1	1938.69	-1.27181	0.115627	-10.9992	3.85e-28	2.84e-26	g6889.t1
g43172.t1	3632.25	-2.25823	0.20532	-10.9985	3.88e-28	2.85e-26	g43172.t1
g36096.t1	478.03	-1.64785	0.149948	-10.9895	4.29e-28	3.15e-26	g36096.t1
g45600.t1	992.606	-1.31341	0.119662	-10.976	4.99e-28	3.64e-26	g45600.t1
g19354.t1	5927.27	1.13531	0.103573	10.9615	5.85e-28	4.27e-26	g19354.t1
g44991.t1	1819.56	1.08787	0.0993412	10.9509	6.58e-28	4.79e-26	g44991.t1
g41666.t1	656.594	-1.50583	0.137543	-10.9481	6.79e-28	4.93e-26	g41666.t1
g1398.t1	6500.25	1.61409	0.147452	10.9465	6.91e-28	5e-26	g1398.t1
g2388.t1	489.081	-1.3835	0.126412	-10.9444	7.07e-28	5.11e-26	g2388.t1
g41622.t1	3529.74	-1.2498	0.114238	-10.9403	7.39e-28	5.33e-26	g41622.t1
g21238.t1	740.042	-1.19467	0.109317	-10.9284	8.43e-28	6.06e-26	g21238.t1
g24815.t1	1604.75	-1.0166	0.093163	-10.9121	1.01e-27	7.24e-26	g24815.t1
g42208.t1	669.928	1.57258	0.144133	10.9106	1.03e-27	7.34e-26	g42208.t1
g41563.t1	9466.15	1.2402	0.1139	10.8885	1.31e-27	9.33e-26	g41563.t1
g9721.t1	664.49	-1.46723	0.134809	-10.8838	1.38e-27	9.81e-26	g9721.t1
g15368.t1	392.679	-2.1094	0.193868	-10.8806	1.43e-27	1.01e-25	g15368.t1
g21702.t1	1793.29	1.32212	0.121784	10.8562	1.86e-27	1.32e-25	g21702.t1
g35986.t1	570.756	-1.32204	0.121924	-10.8431	2.15e-27	1.52e-25	g35986.t1
g24143.t1	1172.5	-2.26717	0.209113	-10.8418	2.18e-27	1.54e-25	g24143.t1
g38449.t1	3647.71	-1.07968	0.0996072	-10.8394	2.24e-27	1.58e-25	g38449.t1
g19717.t1	3831.26	-1.46038	0.134779	-10.8354	2.34e-27	1.64e-25	g19717.t1
g2235.t1	591.376	-1.44912	0.133923	-10.8205	2.75e-27	1.92e-25	g2235.t1
g25051.t1	1882.31	-2.66461	0.246255	-10.8205	2.75e-27	1.92e-25	g25051.t1
g834.t1	982.959	-1.47879	0.136729	-10.8155	2.91e-27	2.03e-25	g834.t1
g45512.t1	797.751	1.42972	0.132434	10.7958	3.6e-27	2.5e-25	g45512.t1
g32637.t1	1117.16	-1.55413	0.144207	-10.7771	4.42e-27	3.06e-25	g32637.t1
g9410.t1	32400.8	1.63484	0.151708	10.7762	4.46e-27	3.08e-25	g9410.t1
g7673.t1	553.243	-1.49714	0.138974	-10.7728	4.63e-27	3.19e-25	g7673.t1
g698.t1	1823.31	-1.35746	0.126027	-10.7712	4.71e-27	3.24e-25	g698.t1
g5249.t1	1257.38	-1.59236	0.14807	-10.7541	5.67e-27	3.89e-25	g5249.t1
g37612.t1	412.941	2.1457	0.199581	10.751	5.86e-27	4.01e-25	g37612.t1
g29675.t1	451.833	-1.50738	0.140298	-10.7441	6.32e-27	4.32e-25	g29675.t1
g14602.t1	1043.07	-1.29926	0.120948	-10.7423	6.45e-27	4.39e-25	g14602.t1
g10208.t1	1430.88	-2.36285	0.219995	-10.7404	6.57e-27	4.46e-25	g10208.t1
g15164.t1	818.645	-1.3881	0.129293	-10.736	6.9e-27	4.67e-25	g15164.t1
g19480.t1	3192.68	1.18383	0.110343	10.7286	7.47e-27	5.05e-25	g19480.t1
g32929.t1	711.629	-1.90023	0.177202	-10.7235	7.89e-27	5.32e-25	g32929.t1
g18831.t1	17716	2.48176	0.231612	10.7152	8.64e-27	5.81e-25	g18831.t1
g23083.t1	835.576	-1.32458	0.123732	-10.7052	9.62e-27	6.46e-25	g23083.t1
g11126.t1	442.395	1.58031	0.147725	10.6976	1.04e-26	6.99e-25	g11126.t1
g28503.t2	628.034	-1.86848	0.174753	-10.6921	1.11e-26	7.4e-25	g28503.t2
g6020.t1	178.642	-2.14697	0.200949	-10.6842	1.21e-26	8.03e-25	g6020.t1
g6508.t1	7246.27	-1.03671	0.0970368	-10.6837	1.21e-26	8.05e-25	g6508.t1
g8871.t1	14078.1	-1.80996	0.169417	-10.6834	1.22e-26	8.06e-25	g8871.t1
g11319.t1	760.255	-1.60333	0.15015	-10.6782	1.29e-26	8.51e-25	g11319.t1
g7054.t1	573.654	1.81133	0.169851	10.6642	1.5e-26	9.87e-25	g7054.t1
g27202.t1	301.425	2.19435	0.205896	10.6576	1.61e-26	1.06e-24	g27202.t1
g23479.t1	4184.61	1.49132	0.140345	10.6261	2.25e-26	1.48e-24	g23479.t1
g20902.t1	1020.43	-1.61991	0.152839	-10.5988	3.02e-26	1.97e-24	g20902.t1
g30835.t1	1381.81	-1.06183	0.100207	-10.5964	3.1e-26	2.02e-24	g30835.t1
g37173.t1	5714.74	-1.71275	0.161641	-10.596	3.11e-26	2.02e-24	g37173.t1
g31435.t1	1552.99	-2.89263	0.273067	-10.5931	3.21e-26	2.08e-24	g31435.t1
g5023.t1	301.02	-1.80975	0.170913	-10.5887	3.36e-26	2.18e-24	g5023.t1
g22115.t1	16349.3	-1.29726	0.122561	-10.5846	3.51e-26	2.27e-24	g22115.t1
g20718.t1	3411.27	-2.44831	0.231655	-10.5688	4.16e-26	2.69e-24	g20718.t1
g23095.t1	1416.18	2.25177	0.213479	10.548	5.19e-26	3.34e-24	g23095.t1
g27707.t1	1861.6	-1.24984	0.118585	-10.5396	5.67e-26	3.65e-24	g27707.t1
g20027.t1	577.274	-1.58174	0.15021	-10.5302	6.27e-26	4.01e-24	g20027.t1
g23191.t1	1192.83	-1.16943	0.11106	-10.5297	6.3e-26	4.03e-24	g23191.t1
g17492.t1	719.79	-2.14153	0.203499	-10.5235	6.73e-26	4.29e-24	g17492.t1
g1337.t1	461.15	-1.32481	0.125967	-10.5171	7.21e-26	4.59e-24	g1337.t1
g21419.t1	884.231	-1.0213	0.0972027	-10.5069	8.03e-26	5.1e-24	g21419.t1
g7505.t1	3045.59	-2.53718	0.241873	-10.4897	9.63e-26	6.09e-24	g7505.t1
g655.t1	2432.15	-2.27685	0.217158	-10.4847	1.02e-25	6.4e-24	g655.t1
g16779.t1	4562.33	-1.40397	0.133973	-10.4795	1.07e-25	6.75e-24	g16779.t1
g30475.t1	1589.39	-1.10949	0.105901	-10.4767	1.11e-25	6.94e-24	g30475.t1
g22836.t1	704.232	-1.43377	0.136864	-10.4759	1.11e-25	6.99e-24	g22836.t1
g5833.t1	352.215	-2.50555	0.239219	-10.4739	1.14e-25	7.12e-24	g5833.t1
g33675.t1	1028.32	-1.38747	0.132581	-10.465	1.25e-25	7.81e-24	g33675.t1
g4815.t1	732.619	-2.90909	0.278033	-10.4631	1.28e-25	7.95e-24	g4815.t1
g21861.t1	1284.96	1.15205	0.110205	10.4537	1.41e-25	8.76e-24	g21861.t1
g19357.t1	8532.39	-1.22839	0.117543	-10.4505	1.46e-25	9.03e-24	g19357.t1
g44858.t1	1431.64	-1.23972	0.118629	-10.4504	1.46e-25	9.03e-24	g44858.t1
g20926.t1	3876.58	-1.51664	0.145152	-10.4486	1.49e-25	9.19e-24	g20926.t1
g19343.t1	423.528	1.86381	0.178398	10.4475	1.5e-25	9.28e-24	g19343.t1
g7062.t1	3986.98	-1.46333	0.14037	-10.4249	1.91e-25	1.18e-23	g7062.t1
g5458.t1	723.43	-1.34966	0.129477	-10.4239	1.93e-25	1.18e-23	g5458.t1
g16932.t1	567.319	-2.38758	0.229192	-10.4174	2.07e-25	1.26e-23	g16932.t1
g30239.t1	273.664	-2.08859	0.200653	-10.409	2.26e-25	1.38e-23	g30239.t1
g28140.t1	841.016	1.42625	0.137048	10.4069	2.31e-25	1.4e-23	g28140.t1
g23374.t1	147.413	-3.6463	0.350479	-10.4038	2.38e-25	1.45e-23	g23374.t1
g24039.t1	3472.78	-1.16089	0.111629	-10.3995	2.49e-25	1.51e-23	g24039.t1
g35619.t1	1121.21	-2.29314	0.220599	-10.3951	2.61e-25	1.58e-23	g35619.t1
g29954.t1	3896.92	-1.11155	0.106973	-10.391	2.72e-25	1.65e-23	g29954.t1
g38499.t1	879.692	-1.61626	0.155555	-10.3903	2.75e-25	1.66e-23	g38499.t1
g33885.t1	3859.3	-1.29997	0.12528	-10.3765	3.17e-25	1.91e-23	g33885.t1
g34173.t1	452.748	-1.49065	0.143659	-10.3763	3.18e-25	1.91e-23	g34173.t1
g1124.t1	725.783	-1.5691	0.151543	-10.3542	4.01e-25	2.4e-23	g1124.t1
g17999.t1	801.884	1.75084	0.169421	10.3343	4.93e-25	2.95e-23	g17999.t1
g38410.t1	1368.17	-1.45746	0.141087	-10.3302	5.14e-25	3.07e-23	g38410.t1
g43586.t1	1035.41	-1.12268	0.10869	-10.3292	5.2e-25	3.1e-23	g43586.t1
g10367.t1	634.373	-1.67908	0.162592	-10.327	5.32e-25	3.16e-23	g10367.t1
g9580.t1	508.925	-1.57074	0.152591	-10.2938	7.52e-25	4.45e-23	g9580.t1
g14737.t1	1211.89	-1.28536	0.125132	-10.272	9.42e-25	5.57e-23	g14737.t1
g31434.t1	2018.94	-2.73373	0.26663	-10.2529	1.15e-24	6.77e-23	g31434.t1
g31524.t1	936.159	-1.23323	0.120302	-10.2512	1.17e-24	6.88e-23	g31524.t1
g15609.t1	1233.87	-1.16389	0.113568	-10.2484	1.2e-24	7.06e-23	g15609.t1
g35888.t1	859.982	-2.25535	0.220182	-10.2431	1.27e-24	7.42e-23	g35888.t1
g27.t1	937.763	-1.49637	0.146264	-10.2306	1.45e-24	8.42e-23	g27.t1
g11700.t1	1410.49	-1.40022	0.136968	-10.2229	1.57e-24	9.1e-23	g11700.t1
g31433.t1	1960.73	-2.71516	0.265797	-10.2152	1.7e-24	9.84e-23	g31433.t1
g39854.t1	458.892	1.97858	0.194075	10.1949	2.09e-24	1.21e-22	g39854.t1
g43858.t1	309.185	-2.65068	0.260173	-10.1882	2.24e-24	1.29e-22	g43858.t1
g34185.t1	319.969	-2.29763	0.225744	-10.178	2.49e-24	1.43e-22	g34185.t1
g11093.t1	300.873	-1.66611	0.163818	-10.1705	2.69e-24	1.55e-22	g11093.t1
g23410.t1	1015.45	-1.53	0.150503	-10.1659	2.81e-24	1.62e-22	g23410.t1
g1741.t1	2148.13	-1.48918	0.14655	-10.1616	2.94e-24	1.69e-22	g1741.t1
g20112.t1	721.507	-1.64343	0.161917	-10.1498	3.32e-24	1.89e-22	g20112.t1
g45723.t1	484.698	-1.97624	0.194705	-10.1499	3.32e-24	1.89e-22	g45723.t1
g24722.t1	256.57	-2.34739	0.231498	-10.14	3.67e-24	2.09e-22	g24722.t1
g34620.t1	490.309	1.47907	0.146012	10.1298	4.08e-24	2.32e-22	g34620.t1
g7094.t1	2447.93	1.18246	0.116825	10.1216	4.43e-24	2.51e-22	g7094.t1
g44566.t1	216.042	-2.21861	0.219204	-10.1212	4.45e-24	2.52e-22	g44566.t1
g3099.t1	2871.1	-1.28906	0.12737	-10.1206	4.48e-24	2.52e-22	g3099.t1
g17125.t1	899.956	1.19894	0.118465	10.1207	4.47e-24	2.52e-22	g17125.t1
g40949.t1	1103.33	1.21908	0.120466	10.1197	4.52e-24	2.54e-22	g40949.t1
g19153.t2	552.079	1.23566	0.122178	10.1136	4.81e-24	2.7e-22	g19153.t2
g18169.t1	912.648	-1.49667	0.14799	-10.1133	4.82e-24	2.7e-22	g18169.t1
g42610.t1	1442.84	-1.9198	0.189848	-10.1123	4.87e-24	2.72e-22	g42610.t1
g36568.t1	1592.31	1.09113	0.108292	10.0758	7.07e-24	3.94e-22	g36568.t1
g33978.t1	208.93	2.05097	0.203721	10.0675	7.69e-24	4.27e-22	g33978.t1
g29050.t1	2324.65	1.22475	0.121978	10.0408	1.01e-23	5.6e-22	g29050.t1
g41285.t1	3535.99	-1.02744	0.102399	-10.0337	1.08e-23	5.98e-22	g41285.t1
g34049.t1	2449.92	-1.14479	0.114112	-10.0322	1.1e-23	6.06e-22	g34049.t1
g35938.t1	452.645	-2.32786	0.232226	-10.0241	1.19e-23	6.55e-22	g35938.t1
g26236.t1	7858.15	-1.48859	0.148531	-10.0221	1.22e-23	6.68e-22	g26236.t1
g10258.t1	505.76	1.86277	0.186041	10.0127	1.34e-23	7.31e-22	g10258.t1
g34664.t1	282.085	1.76057	0.175925	10.0075	1.41e-23	7.69e-22	g34664.t1
g3332.t1	612.088	-1.72725	0.17262	-10.0061	1.43e-23	7.78e-22	g3332.t1
g32310.t1	703.981	-1.40319	0.140245	-10.0053	1.44e-23	7.83e-22	g32310.t1
g38431.t1	270.764	-1.8447	0.184399	-10.0038	1.47e-23	7.92e-22	g38431.t1
g40891.t1	351.45	1.66271	0.166208	10.0038	1.47e-23	7.92e-22	g40891.t1
g33433.t1	1265.68	-1.24554	0.12457	-9.99874	1.54e-23	8.32e-22	g33433.t1
g16424.t1	521.21	1.383	0.138342	9.99703	1.57e-23	8.45e-22	g16424.t1
g966.t1	637.849	-1.72177	0.172291	-9.99337	1.63e-23	8.75e-22	g966.t1
g43524.t1	911.101	-1.41659	0.141802	-9.9899	1.69e-23	9.03e-22	g43524.t1
g30940.t1	217.01	2.05669	0.20589	9.98929	1.7e-23	9.07e-22	g30940.t1
g25721.t1	413.412	-1.84566	0.184831	-9.98569	1.76e-23	9.38e-22	g25721.t1
g9929.t1	4766.52	1.19422	0.119622	9.98328	1.8e-23	9.59e-22	g9929.t1
g38722.t1	4558.81	-1.31192	0.13166	-9.96449	2.18e-23	1.16e-21	g38722.t1
g10712.t1	1788.26	-1.60953	0.161582	-9.96107	2.26e-23	1.2e-21	g10712.t1
g11515.t1	751.914	-2.16257	0.217171	-9.95794	2.33e-23	1.23e-21	g11515.t1
g21462.t1	887.719	-1.29691	0.130356	-9.94897	2.55e-23	1.35e-21	g21462.t1
g12405.t1	678.836	-2.04675	0.205782	-9.94619	2.62e-23	1.38e-21	g12405.t1
g45206.t1	326.207	-12.0445	1.2111	-9.94512	2.65e-23	1.39e-21	g45206.t1
g14500.t1	2104.22	1.1997	0.120683	9.94092	2.76e-23	1.45e-21	g14500.t1
g39554.t1	632.905	-1.14784	0.115516	-9.93656	2.89e-23	1.51e-21	g39554.t1
g11405.t1	323.953	-12.0341	1.21159	-9.93246	3.01e-23	1.57e-21	g11405.t1
g11240.t1	3842.5	-1.45637	0.146696	-9.92779	3.15e-23	1.65e-21	g11240.t1
g35857.t1	277.365	-2.00503	0.202063	-9.92281	3.31e-23	1.73e-21	g35857.t1
g6631.t1	622.552	-1.49734	0.150953	-9.91925	3.43e-23	1.79e-21	g6631.t1
g36227.t1	2023.15	-1.0781	0.108768	-9.91198	3.69e-23	1.92e-21	g36227.t1
g16156.t1	1111.31	-1.3707	0.138367	-9.90626	3.91e-23	2.03e-21	g16156.t1
g28748.t1	2111.7	-2.3005	0.232283	-9.90385	4.01e-23	2.07e-21	g28748.t1
g27299.t1	476.534	-1.81454	0.183367	-9.89565	4.35e-23	2.24e-21	g27299.t1
g23145.t1	1411.02	-2.1686	0.219178	-9.89423	4.41e-23	2.27e-21	g23145.t1
g22978.t1	860.584	-1.477	0.14931	-9.89213	4.5e-23	2.32e-21	g22978.t1
g15715.t1	7954.32	1.6866	0.170505	9.8918	4.52e-23	2.32e-21	g15715.t1
g31851.t1	1234.53	-1.48653	0.150541	-9.87456	5.37e-23	2.75e-21	g31851.t1
g43565.t1	1236.94	-1.27476	0.129145	-9.87082	5.57e-23	2.85e-21	g43565.t1
g7842.t1	995.035	-1.2002	0.121628	-9.8678	5.74e-23	2.93e-21	g7842.t1
g30211.t1	1244.18	-1.17646	0.119319	-9.85981	6.22e-23	3.17e-21	g30211.t1
g5766.t1	467.366	-1.99272	0.202207	-9.85485	6.53e-23	3.33e-21	g5766.t1
g31049.t1	30476	1.83385	0.186144	9.8518	6.73e-23	3.42e-21	g31049.t1
g17763.t1	635.998	-1.29613	0.13157	-9.85122	6.77e-23	3.43e-21	g17763.t1
g11178.t1	31928	1.06611	0.108347	9.83974	7.59e-23	3.84e-21	g11178.t1
g36947.t1	205.416	2.82723	0.287377	9.83805	7.72e-23	3.9e-21	g36947.t1
g35643.t1	430.02	-1.82336	0.18542	-9.8337	8.06e-23	4.06e-21	g35643.t1
g34566.t1	1775.27	1.31919	0.134228	9.828	8.53e-23	4.29e-21	g34566.t1
g26059.t1	558.23	1.44241	0.146899	9.81906	9.32e-23	4.67e-21	g26059.t1
g33316.t1	362.958	-1.38855	0.14141	-9.81936	9.29e-23	4.67e-21	g33316.t1
g19016.t1	808.796	-1.19828	0.122054	-9.81769	9.45e-23	4.73e-21	g19016.t1
g15170.t1	1184.95	-1.73073	0.176449	-9.80865	1.03e-22	5.15e-21	g15170.t1
g6044.t1	12114.8	1.38451	0.141283	9.7995	1.13e-22	5.62e-21	g6044.t1
g30076.t1	746.453	-2.09145	0.213543	-9.79406	1.19e-22	5.92e-21	g30076.t1
g43345.t1	1524.46	-1.25364	0.128044	-9.79069	1.23e-22	6.11e-21	g43345.t1
g10742.t1	1001.36	-1.49396	0.152705	-9.78327	1.33e-22	6.56e-21	g10742.t1
g40984.t1	131.416	-4.34953	0.445286	-9.76794	1.55e-22	7.61e-21	g40984.t1
g6848.t1	1821.65	1.2608	0.129119	9.76466	1.6e-22	7.84e-21	g6848.t1
g9632.t1	1058.42	1.40127	0.143557	9.76108	1.65e-22	8.11e-21	g9632.t1
g35002.t2	1215.15	-1.75306	0.179689	-9.75605	1.74e-22	8.5e-21	g35002.t2
g3189.t1	1101.1	-1.33493	0.136853	-9.75448	1.76e-22	8.61e-21	g3189.t1
g34061.t1	10176.4	-1.42612	0.1464	-9.74128	2.01e-22	9.8e-21	g34061.t1
g8890.t1	918.04	-1.17716	0.121166	-9.71524	2.6e-22	1.26e-20	g8890.t1
g21075.t1	2984.1	-1.15162	0.118651	-9.70593	2.84e-22	1.38e-20	g21075.t1
g5325.t1	1290.59	1.21068	0.124769	9.70341	2.92e-22	1.41e-20	g5325.t1
g29431.t1	721.828	1.37754	0.142087	9.69501	3.17e-22	1.53e-20	g29431.t1
g27330.t1	1818.72	-1.68245	0.173541	-9.69482	3.17e-22	1.53e-20	g27330.t1
g17430.t1	184.456	2.89371	0.298486	9.69463	3.18e-22	1.53e-20	g17430.t1
g8510.t1	492.889	-1.88916	0.194913	-9.69233	3.25e-22	1.56e-20	g8510.t1
g10718.t1	735.249	-1.34805	0.139202	-9.68407	3.52e-22	1.69e-20	g10718.t1
g24727.t1	2895.66	-1.16326	0.120224	-9.6757	3.82e-22	1.83e-20	g24727.t1
g27653.t1	588.871	-1.81161	0.187315	-9.67145	3.99e-22	1.9e-20	g27653.t1
g15394.t1	991.708	-1.19562	0.123633	-9.67069	4.02e-22	1.91e-20	g15394.t1
g22652.t1	513.533	-2.293	0.237112	-9.67055	4.02e-22	1.91e-20	g22652.t1
g25866.t1	665.947	-1.32591	0.137108	-9.6706	4.02e-22	1.91e-20	g25866.t1
g14378.t1	3023.87	-1.0656	0.110228	-9.66723	4.15e-22	1.97e-20	g14378.t1
g31760.t1	550.106	-1.371	0.141838	-9.66601	4.2e-22	1.99e-20	g31760.t1
g39763.t1	1310.19	-1.59615	0.165181	-9.66303	4.33e-22	2.04e-20	g39763.t1
g20955.t1	4117.13	1.5522	0.160958	9.64348	5.24e-22	2.47e-20	g20955.t1
g3216.t1	1456.71	-1.22758	0.127322	-9.64152	5.34e-22	2.51e-20	g3216.t1
g7795.t1	1314.4	-1.07616	0.111619	-9.64136	5.35e-22	2.51e-20	g7795.t1
g43327.t1	4661.97	1.43431	0.148941	9.63009	5.97e-22	2.79e-20	g43327.t1
g30419.t1	666.522	-1.48759	0.154546	-9.62555	6.24e-22	2.91e-20	g30419.t1
g41346.t1	881.872	-1.06943	0.111286	-9.60977	7.27e-22	3.39e-20	g41346.t1
g30601.t1	1054.98	-1.17217	0.121984	-9.60921	7.31e-22	3.4e-20	g30601.t1
g10574.t1	337.339	-2.31044	0.240532	-9.60554	7.58e-22	3.52e-20	g10574.t1
g13862.t1	2028.46	-1.35743	0.141437	-9.59746	8.19e-22	3.8e-20	g13862.t1
g42187.t1	722.283	1.30084	0.135554	9.59653	8.27e-22	3.83e-20	g42187.t1
g3348.t1	3711.22	-1.91977	0.200106	-9.59376	8.49e-22	3.92e-20	g3348.t1
g46166.t1	513.492	-1.91805	0.199931	-9.59357	8.51e-22	3.93e-20	g46166.t1
g32578.t1	14485.4	-1.34279	0.140081	-9.58585	9.17e-22	4.21e-20	g32578.t1
g2633.t1	179.602	2.20811	0.230361	9.58542	9.21e-22	4.22e-20	g2633.t1
g41315.t1	2870.7	1.26675	0.132223	9.58038	9.67e-22	4.43e-20	g41315.t1
g39869.t1	3618.94	-1.51775	0.158448	-9.57884	9.81e-22	4.49e-20	g39869.t1
g20694.t1	2045.04	-1.72535	0.1804	-9.56404	1.13e-21	5.16e-20	g20694.t1
g17105.t1	370.011	-1.49147	0.155968	-9.56264	1.15e-21	5.22e-20	g17105.t1
g33180.t1	503.553	-1.27038	0.132881	-9.56031	1.17e-21	5.33e-20	g33180.t1
g18824.t1	533.215	1.39593	0.146083	9.55572	1.23e-21	5.56e-20	g18824.t1
g29642.t1	888.213	-1.11636	0.116912	-9.54867	1.31e-21	5.94e-20	g29642.t1
g8564.t1	898.427	-1.96669	0.206003	-9.54692	1.34e-21	6.04e-20	g8564.t1
g35381.t1	509.31	-1.97837	0.207296	-9.54373	1.38e-21	6.22e-20	g35381.t1
g40449.t1	2396.84	-1.05072	0.110115	-9.54206	1.4e-21	6.31e-20	g40449.t1
g32495.t1	1087.39	-1.11183	0.116558	-9.53884	1.44e-21	6.5e-20	g32495.t1
g39801.t1	1268.21	-1.25961	0.132155	-9.53132	1.55e-21	6.98e-20	g39801.t1
g15397.t1	461.216	-1.65788	0.173968	-9.5298	1.58e-21	7.07e-20	g15397.t1
g39021.t1	1116.49	-1.64539	0.172711	-9.52683	1.62e-21	7.26e-20	g39021.t1
g24630.t1	727.605	-1.25138	0.131418	-9.52212	1.7e-21	7.59e-20	g24630.t1
g44264.t1	2274.66	-1.31559	0.138324	-9.51093	1.89e-21	8.43e-20	g44264.t1
g1395.t1	439.842	-1.94984	0.205175	-9.5033	2.03e-21	9.05e-20	g1395.t1
g4884.t1	264.359	-1.82994	0.192746	-9.49408	2.22e-21	9.88e-20	g4884.t1
g6787.t1	2426.88	-1.65683	0.174599	-9.48933	2.33e-21	1.03e-19	g6787.t1
g40018.t1	2014.8	-1.88405	0.198607	-9.48631	2.39e-21	1.06e-19	g40018.t1
g10274.t1	162.405	2.5272	0.266489	9.48332	2.46e-21	1.09e-19	g10274.t1
g9183.t1	736.374	1.24461	0.131419	9.47052	2.78e-21	1.23e-19	g9183.t1
g35710.t1	1440.88	-1.37587	0.145305	-9.46888	2.83e-21	1.25e-19	g35710.t1
g4211.t1	2843.44	1.03874	0.109782	9.46182	3.03e-21	1.33e-19	g4211.t1
g10675.t1	526.249	-1.50859	0.159457	-9.46078	3.06e-21	1.34e-19	g10675.t1
g34966.t1	1153.71	-1.82943	0.193715	-9.44394	3.59e-21	1.58e-19	g34966.t1
g37556.t1	124.652	3.59602	0.38122	9.43293	3.99e-21	1.75e-19	g37556.t1
g9850.t1	168.466	-1.96697	0.208841	-9.41853	4.57e-21	2e-19	g9850.t1
g43679.t1	6956.28	-2.64543	0.280911	-9.41733	4.63e-21	2.02e-19	g43679.t1
g5061.t1	1077.71	1.15038	0.122167	9.41643	4.67e-21	2.04e-19	g5061.t1
g35393.t1	1198.73	-1.67996	0.178437	-9.41485	4.74e-21	2.06e-19	g35393.t1
g45448.t1	582.221	-1.24718	0.132516	-9.41153	4.89e-21	2.12e-19	g45448.t1
g16553.t1	594.601	-1.13531	0.120681	-9.40747	5.08e-21	2.2e-19	g16553.t1
g38782.t1	215.814	-4.20262	0.44688	-9.40436	5.23e-21	2.27e-19	g38782.t1
g6491.t1	602.908	-1.20583	0.128455	-9.38718	6.16e-21	2.66e-19	g6491.t1
g30326.t1	1642.98	-1.92452	0.205281	-9.37507	6.91e-21	2.98e-19	g30326.t1
g6553.t1	14778.3	-2.04711	0.218511	-9.36846	7.36e-21	3.16e-19	g6553.t1
g23245.t1	174.937	1.97874	0.211257	9.3665	7.5e-21	3.22e-19	g23245.t1
g27433.t2	1099.78	-1.66504	0.177791	-9.36511	7.6e-21	3.25e-19	g27433.t2
g4213.t1	644.75	1.70063	0.181668	9.36122	7.88e-21	3.37e-19	g4213.t1
g21437.t1	1188.46	-1.97831	0.21135	-9.36037	7.95e-21	3.39e-19	g21437.t1
g6808.t1	473.627	-1.57691	0.168515	-9.35767	8.15e-21	3.47e-19	g6808.t1
g36009.t1	663.31	-1.65994	0.177422	-9.35589	8.29e-21	3.52e-19	g36009.t1
g12655.t1	1280.15	-1.31217	0.140296	-9.3529	8.53e-21	3.62e-19	g12655.t1
g13530.t1	3374.17	-2.10867	0.225488	-9.35159	8.63e-21	3.66e-19	g13530.t1
g6585.t1	4008.6	-1.15194	0.123225	-9.34823	8.91e-21	3.77e-19	g6585.t1
g44424.t1	244.248	-1.94718	0.208669	-9.33142	1.04e-20	4.41e-19	g44424.t1
g23588.t1	1670.6	-1.34811	0.144693	-9.31701	1.2e-20	5.05e-19	g23588.t1
g9090.t1	2777.87	-1.72055	0.184787	-9.311	1.27e-20	5.33e-19	g9090.t1
g37244.t1	1435.83	-1.13305	0.121718	-9.30882	1.29e-20	5.44e-19	g37244.t1
g19090.t1	371.984	-1.68341	0.180875	-9.30702	1.31e-20	5.52e-19	g19090.t1
g43633.t1	991.995	-1.10292	0.118634	-9.29681	1.45e-20	6.07e-19	g43633.t1
g8566.t1	2402.29	-1.55609	0.167398	-9.29577	1.46e-20	6.12e-19	g8566.t1
g15321.t1	22587.6	-1.19987	0.129086	-9.29514	1.47e-20	6.15e-19	g15321.t1
g9935.t1	871.845	-1.92622	0.207304	-9.29176	1.52e-20	6.34e-19	g9935.t1
g1077.t1	929.152	-2.05568	0.221383	-9.28563	1.61e-20	6.71e-19	g1077.t1
g34258.t1	412.218	-1.42158	0.153117	-9.28425	1.63e-20	6.78e-19	g34258.t1
g9389.t1	974.661	-2.03306	0.218991	-9.28378	1.64e-20	6.8e-19	g9389.t1
g26629.t1	1202.97	-1.48091	0.159564	-9.28094	1.68e-20	6.98e-19	g26629.t1
g19861.t1	286.264	1.46283	0.157635	9.27984	1.7e-20	7.04e-19	g19861.t1
g2601.t1	1670.55	-1.41287	0.152469	-9.2666	1.92e-20	7.94e-19	g2601.t1
g43178.t1	18178.4	-1.22534	0.132259	-9.26469	1.96e-20	8.07e-19	g43178.t1
g44660.t1	745.542	-1.79606	0.193878	-9.26385	1.97e-20	8.12e-19	g44660.t1
g36687.t1	1620.84	-1.04029	0.112458	-9.2505	2.23e-20	9.19e-19	g36687.t1
g9136.t1	533.524	-1.61404	0.174604	-9.24402	2.37e-20	9.76e-19	g9136.t1
g6348.t1	756.667	-1.28674	0.139247	-9.24073	2.45e-20	1e-18	g6348.t1
g23420.t1	1342.98	-1.5101	0.163448	-9.239	2.49e-20	1.02e-18	g23420.t1
g15810.t1	521.27	-1.57203	0.170174	-9.23776	2.52e-20	1.03e-18	g15810.t1
g15838.t1	140.816	-2.30825	0.250105	-9.22912	2.73e-20	1.12e-18	g15838.t1
g419.t1	1079.27	-1.20635	0.130718	-9.22865	2.74e-20	1.12e-18	g419.t1
g45665.t1	743.576	-1.03668	0.112364	-9.22606	2.81e-20	1.14e-18	g45665.t1
g6416.t1	1258.27	-1.38494	0.150173	-9.22228	2.91e-20	1.18e-18	g6416.t1
g29571.t1	4272.26	-1.31726	0.142901	-9.21803	3.03e-20	1.23e-18	g29571.t1
g40940.t1	2394.3	-1.44267	0.156511	-9.2177	3.04e-20	1.23e-18	g40940.t1
g22990.t1	6390.33	1.57117	0.170493	9.21548	3.1e-20	1.25e-18	g22990.t1
g23780.t1	646.022	1.1364	0.123346	9.21318	3.17e-20	1.28e-18	g23780.t1
g37946.t1	3208.84	1.77658	0.192891	9.21026	3.25e-20	1.31e-18	g37946.t1
g8428.t1	317.276	-1.50369	0.163282	-9.20917	3.29e-20	1.33e-18	g8428.t1
g32726.t1	2129.08	-2.00459	0.217722	-9.2071	3.35e-20	1.35e-18	g32726.t1
g37765.t1	533.24	-1.19068	0.129358	-9.2045	3.43e-20	1.38e-18	g37765.t1
g812.t1	2209.05	-1.89649	0.20642	-9.18753	4.02e-20	1.61e-18	g812.t1
g19400.t1	206.515	-11.3839	1.23907	-9.18751	4.02e-20	1.61e-18	g19400.t1
g18901.t1	478.507	1.30621	0.142193	9.18622	4.07e-20	1.63e-18	g18901.t1
g41939.t1	8757.08	-2.41356	0.262919	-9.17983	4.32e-20	1.72e-18	g41939.t1
g35941.t1	524.269	-1.98113	0.215842	-9.1786	4.37e-20	1.74e-18	g35941.t1
g12106.t1	316.144	-1.63898	0.178583	-9.17767	4.41e-20	1.75e-18	g12106.t1
g23777.t1	1631.09	1.18736	0.129515	9.16777	4.83e-20	1.92e-18	g23777.t1
g29808.t1	423.855	-1.74335	0.190185	-9.16664	4.88e-20	1.94e-18	g29808.t1
g3163.t1	789.223	-1.02897	0.112342	-9.15924	5.23e-20	2.07e-18	g3163.t1
g23244.t1	940.896	-1.20128	0.131208	-9.15552	5.41e-20	2.14e-18	g23244.t1
g12727.t1	694.147	-1.6988	0.185568	-9.15457	5.46e-20	2.15e-18	g12727.t1
g28120.t1	487.641	-1.63596	0.178833	-9.14796	5.8e-20	2.29e-18	g28120.t1
g8017.t1	201.551	1.92317	0.21026	9.14664	5.87e-20	2.31e-18	g8017.t1
g6593.t1	1788.85	-1.35412	0.148165	-9.13931	6.29e-20	2.47e-18	g6593.t1
g12603.t1	13738.3	-1.46889	0.160741	-9.1382	6.35e-20	2.49e-18	g12603.t1
g18827.t1	2401.88	-1.0431	0.114243	-9.13053	6.82e-20	2.67e-18	g18827.t1
g495.t1	252.126	-1.92957	0.211415	-9.12695	7.05e-20	2.76e-18	g495.t1
g11932.t2	679.678	-1.38553	0.151855	-9.12403	7.24e-20	2.83e-18	g11932.t2
g25744.t1	441.722	-1.78431	0.195707	-9.11728	7.7e-20	3.01e-18	g25744.t1
g17499.t1	1115.37	-1.64643	0.180763	-9.10825	8.37e-20	3.26e-18	g17499.t1
g40385.t1	597.062	1.47396	0.16189	9.1047	8.65e-20	3.37e-18	g40385.t1
g1627.t1	113.153	-2.40862	0.264761	-9.09733	9.26e-20	3.6e-18	g1627.t1
g12850.t1	711.828	1.05207	0.115752	9.08896	1e-19	3.86e-18	g12850.t1
g38108.t1	2247.08	2.03903	0.224519	9.08179	1.07e-19	4.12e-18	g38108.t1
g27251.t1	7344.97	-2.23638	0.246367	-9.07743	1.11e-19	4.28e-18	g27251.t1
g7120.t2	1102.72	-1.31452	0.144826	-9.07652	1.12e-19	4.31e-18	g7120.t2
g3400.t1	820.859	-1.90791	0.210219	-9.07579	1.13e-19	4.33e-18	g3400.t1
g35916.t1	626.807	-1.55086	0.170883	-9.07555	1.13e-19	4.34e-18	g35916.t1
g14747.t1	1297.68	-1.76029	0.19397	-9.0751	1.14e-19	4.35e-18	g14747.t1
g33449.t1	603.176	1.8943	0.208839	9.07059	1.18e-19	4.53e-18	g33449.t1
g32240.t1	843.938	-1.26292	0.139278	-9.06764	1.22e-19	4.65e-18	g32240.t1
g22948.t1	1444.09	-1.41104	0.155824	-9.05533	1.36e-19	5.19e-18	g22948.t1
g26550.t1	845.746	-1.35414	0.149546	-9.05499	1.37e-19	5.2e-18	g26550.t1
g2127.t1	1356.66	1.04574	0.115518	9.0526	1.4e-19	5.31e-18	g2127.t1
g17639.t1	1268.76	-1.13752	0.125689	-9.05032	1.43e-19	5.41e-18	g17639.t1
g33249.t1	1375.72	-1.19441	0.132006	-9.04816	1.45e-19	5.51e-18	g33249.t1
g25604.t1	108.675	2.48103	0.274213	9.04783	1.46e-19	5.52e-18	g25604.t1
g34368.t1	428.817	1.17562	0.130024	9.0416	1.54e-19	5.84e-18	g34368.t1
g166.t1	855.648	-1.03884	0.114898	-9.04135	1.55e-19	5.85e-18	g166.t1
g13803.t1	1528.01	-1.73037	0.191616	-9.03042	1.71e-19	6.44e-18	g13803.t1
g1011.t1	2485.72	-1.37567	0.152495	-9.0211	1.86e-19	7e-18	g1011.t1
g27725.t1	236.637	-1.64805	0.18273	-9.01908	1.9e-19	7.12e-18	g27725.t1
g15555.t1	9176.68	-1.45779	0.161862	-9.00638	2.13e-19	7.99e-18	g15555.t1
g6528.t1	464.401	-1.82538	0.202718	-9.00456	2.17e-19	8.11e-18	g6528.t1
g13446.t1	347.616	-1.56951	0.174325	-9.00336	2.19e-19	8.19e-18	g13446.t1
g4117.t1	389.817	-1.65861	0.184295	-8.99976	2.26e-19	8.45e-18	g4117.t1
g13959.t1	458.823	-1.2068	0.134172	-8.99448	2.37e-19	8.86e-18	g13959.t1
g40808.t1	1688.05	2.08694	0.232087	8.99205	2.43e-19	9.04e-18	g40808.t1
g28253.t1	188.384	-2.19617	0.244554	-8.98031	2.7e-19	1e-17	g28253.t1
g15846.t1	3512.47	-1.10736	0.123319	-8.97957	2.72e-19	1.01e-17	g15846.t1
g39761.t1	932.013	-1.01362	0.112907	-8.97746	2.77e-19	1.03e-17	g39761.t1
g29723.t1	336.254	-1.49374	0.166474	-8.97281	2.89e-19	1.07e-17	g29723.t1
g40418.t1	450.385	-2.01801	0.224976	-8.96989	2.97e-19	1.1e-17	g40418.t1
g4735.t1	550.453	-1.18651	0.132424	-8.95992	3.25e-19	1.2e-17	g4735.t1
g10310.t1	3448.26	-2.18524	0.244063	-8.95359	3.44e-19	1.26e-17	g10310.t1
g21473.t1	104.162	-2.91824	0.326048	-8.95034	3.54e-19	1.3e-17	g21473.t1
g38369.t1	702.552	-1.80909	0.202136	-8.94984	3.56e-19	1.3e-17	g38369.t1
g30731.t1	670.414	-1.51457	0.169293	-8.94643	3.67e-19	1.34e-17	g30731.t1
g44349.t1	4179.43	-1.03917	0.11623	-8.94069	3.87e-19	1.41e-17	g44349.t1
g14484.t1	501.692	-1.54859	0.173379	-8.93183	4.19e-19	1.53e-17	g14484.t1
g30925.t1	1675.48	-1.27331	0.142571	-8.93103	4.22e-19	1.54e-17	g30925.t1
g18578.t1	178.625	-11.1764	1.2527	-8.92181	4.59e-19	1.67e-17	g18578.t1
g13370.t1	1583.43	-1.01932	0.114272	-8.92015	4.66e-19	1.69e-17	g13370.t1
g26239.t1	1202.23	-1.35774	0.15223	-8.91901	4.7e-19	1.71e-17	g26239.t1
g43778.t1	564.781	-1.41614	0.158962	-8.90868	5.16e-19	1.87e-17	g43778.t1
g25677.t1	641.705	-1.27337	0.14311	-8.89783	5.69e-19	2.06e-17	g25677.t1
g40301.t1	531.379	1.4501	0.162998	8.89645	5.77e-19	2.08e-17	g40301.t1
g5341.t1	258.646	1.82547	0.205229	8.89478	5.85e-19	2.11e-17	g5341.t1
g21666.t1	291.126	-1.64744	0.185217	-8.89467	5.86e-19	2.11e-17	g21666.t1
g33997.t1	565.444	1.08834	0.122369	8.89396	5.9e-19	2.12e-17	g33997.t1
g16050.t1	634.849	-1.94702	0.219027	-8.88939	6.14e-19	2.21e-17	g16050.t1
g6693.t1	980.668	1.25482	0.141168	8.88882	6.18e-19	2.21e-17	g6693.t1
g42410.t1	1565.36	-1.07525	0.121061	-8.88192	6.57e-19	2.35e-17	g42410.t1
g13453.t1	492.841	-1.06291	0.119737	-8.87704	6.87e-19	2.46e-17	g13453.t1
g30971.t1	561.834	-1.21397	0.136838	-8.87161	7.21e-19	2.58e-17	g30971.t1
g43562.t1	146.821	-10.8915	1.2297	-8.85707	8.21e-19	2.93e-17	g43562.t1
g1748.t1	4755.48	1.05268	0.118917	8.85226	8.58e-19	3.06e-17	g1748.t1
g1177.t1	1760.03	-1.27246	0.143793	-8.8492	8.81e-19	3.14e-17	g1177.t1
g7846.t1	804.767	1.07814	0.121868	8.84684	9e-19	3.2e-17	g7846.t1
g44328.t1	1258.42	1.04613	0.118298	8.84315	9.31e-19	3.31e-17	g44328.t1
g31354.t1	1122.16	1.56136	0.176918	8.82531	1.09e-18	3.87e-17	g31354.t1
g12885.t1	379.74	-2.02743	0.229794	-8.82278	1.12e-18	3.96e-17	g12885.t1
g29255.t1	187.612	-1.9546	0.222196	-8.79673	1.41e-18	4.99e-17	g29255.t1
g28314.t1	1141.28	-1.29472	0.147295	-8.79	1.5e-18	5.29e-17	g28314.t1
g2720.t1	1677.46	-1.41518	0.161008	-8.78953	1.5e-18	5.3e-17	g2720.t1
g38105.t1	29231.1	1.59819	0.181837	8.78917	1.51e-18	5.32e-17	g38105.t1
g41458.t1	7661.05	-1.22457	0.139335	-8.78868	1.51e-18	5.33e-17	g41458.t1
g8591.t1	2455.76	-1.02085	0.116228	-8.78315	1.59e-18	5.59e-17	g8591.t1
g29067.t1	2541.19	-1.14607	0.130562	-8.77801	1.66e-18	5.84e-17	g29067.t1
g17522.t1	1190.11	-1.32717	0.151196	-8.77778	1.67e-18	5.85e-17	g17522.t1
g8468.t1	824.45	-1.0293	0.117309	-8.77426	1.72e-18	6.03e-17	g8468.t1
g13544.t1	3177.16	-1.32006	0.15051	-8.77063	1.78e-18	6.21e-17	g13544.t1
g6151.t1	765.822	1.57169	0.179365	8.76249	1.91e-18	6.67e-17	g6151.t1
g45102.t1	1006.51	1.10765	0.126411	8.76229	1.91e-18	6.67e-17	g45102.t1
g28421.t1	681.123	-1.59639	0.182209	-8.76128	1.93e-18	6.72e-17	g28421.t1
g41165.t1	2596.54	-1.55169	0.177225	-8.75548	2.03e-18	7.06e-17	g41165.t1
g19926.t1	791.214	1.74061	0.198821	8.75468	2.05e-18	7.11e-17	g19926.t1
g28026.t1	115.372	-2.84146	0.32484	-8.74725	2.19e-18	7.57e-17	g28026.t1
g6748.t1	974.266	-1.07288	0.122697	-8.74417	2.25e-18	7.77e-17	g6748.t1
g25740.t1	396.895	1.88033	0.215202	8.73751	2.38e-18	8.22e-17	g25740.t1
g5767.t1	982.436	-1.05227	0.120456	-8.73572	2.42e-18	8.34e-17	g5767.t1
g15374.t1	491.712	-1.41402	0.16193	-8.7323	2.5e-18	8.58e-17	g15374.t1
g38471.t1	1841.41	-1.82465	0.209066	-8.72762	2.6e-18	8.94e-17	g38471.t1
g35621.t1	469.033	-1.70086	0.194982	-8.72318	2.7e-18	9.27e-17	g35621.t1
g20595.t1	554.232	-1.34332	0.154033	-8.72104	2.76e-18	9.44e-17	g20595.t1
g22723.t1	356.265	-1.86735	0.214164	-8.71926	2.8e-18	9.58e-17	g22723.t1
g10573.t1	1613.75	1.7073	0.19585	8.7174	2.85e-18	9.73e-17	g10573.t1
g26269.t1	303.705	-1.84745	0.212225	-8.70514	3.17e-18	1.08e-16	g26269.t1
g24000.t1	1469.41	-1.7436	0.200376	-8.70166	3.27e-18	1.11e-16	g24000.t1
g39743.t1	925.653	-1.05627	0.12147	-8.6957	3.45e-18	1.17e-16	g39743.t1
g31674.t1	5987.96	-1.14357	0.131536	-8.69394	3.5e-18	1.19e-16	g31674.t1
g41435.t1	707.983	-1.15283	0.132657	-8.69028	3.62e-18	1.23e-16	g41435.t1
g4536.t1	155.114	2.3669	0.272431	8.68807	3.69e-18	1.25e-16	g4536.t1
g28808.t1	935.023	-1.35089	0.155586	-8.68262	3.87e-18	1.31e-16	g28808.t1
g22324.t1	315.966	-2.73555	0.31516	-8.67987	3.96e-18	1.34e-16	g22324.t1
g12049.t1	187.357	-1.82899	0.210796	-8.67657	4.08e-18	1.37e-16	g12049.t1
g33169.t1	571.419	-1.32412	0.152655	-8.67391	4.18e-18	1.4e-16	g33169.t1
g17999.t2	137.655	-10.7995	1.24533	-8.67198	4.25e-18	1.43e-16	g17999.t2
g39547.t1	1041.1	-1.16032	0.133832	-8.66999	4.32e-18	1.45e-16	g39547.t1
g9810.t1	702.023	1.44648	0.166945	8.66439	4.54e-18	1.52e-16	g9810.t1
g36592.t1	630.642	-1.55221	0.179163	-8.66366	4.57e-18	1.53e-16	g36592.t1
g17739.t1	715.45	-1.19529	0.137988	-8.66228	4.62e-18	1.55e-16	g17739.t1
g30863.t1	370.526	-1.67068	0.192885	-8.66155	4.65e-18	1.56e-16	g30863.t1
g5232.t1	918.233	1.25185	0.144623	8.65598	4.89e-18	1.63e-16	g5232.t1
g5077.t1	1386.7	-1.04882	0.121207	-8.65307	5.01e-18	1.67e-16	g5077.t1
g21291.t1	5800.18	1.25602	0.145277	8.6457	5.35e-18	1.78e-16	g21291.t1
g40666.t1	824.535	-1.69895	0.196532	-8.64466	5.4e-18	1.79e-16	g40666.t1
g45751.t1	9198.75	1.51189	0.174943	8.64218	5.52e-18	1.83e-16	g45751.t1
g27844.t1	726.802	-1.14916	0.133046	-8.63734	5.75e-18	1.91e-16	g27844.t1
g4484.t1	909.835	-1.25898	0.145795	-8.6353	5.86e-18	1.94e-16	g4484.t1
g36830.t1	210.003	2.45692	0.284531	8.63499	5.87e-18	1.94e-16	g36830.t1
g25919.t1	1872.28	-2.54099	0.294275	-8.63473	5.89e-18	1.95e-16	g25919.t1
g4092.t1	311.452	-1.49899	0.173723	-8.62861	6.21e-18	2.05e-16	g4092.t1
g22947.t1	4237.65	1.1515	0.133465	8.62768	6.26e-18	2.06e-16	g22947.t1
g41080.t1	532.476	-1.53241	0.177643	-8.62634	6.33e-18	2.09e-16	g41080.t1
g29665.t1	350.981	-1.5543	0.18022	-8.62443	6.44e-18	2.12e-16	g29665.t1
g33695.t1	701.085	-2.27266	0.263535	-8.62375	6.48e-18	2.13e-16	g33695.t1
g42421.t1	1708.33	-1.20471	0.139721	-8.62226	6.56e-18	2.16e-16	g42421.t1
g35232.t1	436.474	-1.86084	0.215957	-8.61668	6.89e-18	2.26e-16	g35232.t1
g781.t1	889.056	1.10907	0.128743	8.61456	7.02e-18	2.3e-16	g781.t1
g34545.t1	381.54	-1.54938	0.179885	-8.61314	7.11e-18	2.33e-16	g34545.t1
g7341.t1	879.044	1.67766	0.1948	8.6122	7.17e-18	2.34e-16	g7341.t1
g28829.t1	197.706	-2.15282	0.250154	-8.60599	7.57e-18	2.47e-16	g28829.t1
g21908.t1	188.392	1.90199	0.221158	8.60015	7.96e-18	2.59e-16	g21908.t1
g2905.t1	4417.87	-1.25917	0.146522	-8.59374	8.42e-18	2.74e-16	g2905.t1
g14589.t1	6820.83	-1.03295	0.120267	-8.58882	8.79e-18	2.86e-16	g14589.t1
g20155.t1	2859.34	-1.26532	0.147346	-8.58739	8.9e-18	2.89e-16	g20155.t1
g420.t1	780.774	-1.71178	0.199341	-8.58719	8.91e-18	2.89e-16	g420.t1
g6152.t1	799.774	-1.07648	0.125366	-8.58667	8.95e-18	2.9e-16	g6152.t1
g44949.t2	216.423	-1.9218	0.223813	-8.58667	8.95e-18	2.9e-16	g44949.t2
g33095.t1	1906.76	-2.41743	0.281842	-8.57723	9.72e-18	3.14e-16	g33095.t1
g9889.t1	172.292	-2.0217	0.235929	-8.5691	1.04e-17	3.37e-16	g9889.t1
g39939.t1	530.865	1.25487	0.146726	8.55247	1.2e-17	3.88e-16	g39939.t1
g12602.t1	15844.8	-1.59071	0.186011	-8.55172	1.21e-17	3.9e-16	g12602.t1
g39819.t1	1022.75	-1.38142	0.161599	-8.54845	1.25e-17	4.01e-16	g39819.t1
g22872.t1	606.841	-2.50733	0.293505	-8.5427	1.31e-17	4.21e-16	g22872.t1
g26350.t1	806.022	-1.28724	0.15071	-8.54115	1.33e-17	4.25e-16	g26350.t1
g41380.t1	1290.53	-1.22287	0.143171	-8.54128	1.33e-17	4.25e-16	g41380.t1
g44422.t1	572.076	-1.76283	0.206393	-8.54115	1.33e-17	4.25e-16	g44422.t1
g20206.t1	767.11	1.16997	0.13708	8.53493	1.4e-17	4.48e-16	g20206.t1
g18542.t1	428.046	-1.43134	0.167813	-8.52933	1.47e-17	4.7e-16	g18542.t1
g28385.t1	3054.06	1.90032	0.222802	8.52916	1.47e-17	4.7e-16	g28385.t1
g16875.t1	964.885	-1.12416	0.131807	-8.5288	1.48e-17	4.71e-16	g16875.t1
g22998.t1	720.697	-1.07235	0.125742	-8.52815	1.49e-17	4.73e-16	g22998.t1
g5664.t1	942.403	-1.64902	0.193486	-8.52266	1.56e-17	4.95e-16	g5664.t1
g31465.t1	2062.62	-1.16105	0.136264	-8.52058	1.59e-17	5.04e-16	g31465.t1
g4775.t1	351.39	-1.78416	0.209506	-8.51603	1.65e-17	5.24e-16	g4775.t1
g19829.t1	709.343	-1.39792	0.164178	-8.51466	1.67e-17	5.29e-16	g19829.t1
g40658.t1	858.493	-1.95697	0.22989	-8.51261	1.7e-17	5.38e-16	g40658.t1
g23032.t2	930.562	-2.14414	0.251949	-8.5102	1.74e-17	5.49e-16	g23032.t2
g9952.t1	344.058	-1.90011	0.223367	-8.50667	1.79e-17	5.65e-16	g9952.t1
g17286.t1	1130.56	1.31865	0.155279	8.49214	2.03e-17	6.38e-16	g17286.t1
g26248.t1	8386.22	-1.35885	0.160031	-8.49121	2.04e-17	6.42e-16	g26248.t1
g27012.t1	582.398	-1.22262	0.144004	-8.49021	2.06e-17	6.47e-16	g27012.t1
g1812.t1	248.838	1.9183	0.226114	8.48377	2.18e-17	6.83e-16	g1812.t1
g15073.t1	2618.83	-2.28684	0.26956	-8.48362	2.18e-17	6.84e-16	g15073.t1
g31907.t1	831.861	-1.37338	0.161954	-8.48006	2.25e-17	7.03e-16	g31907.t1
g29837.t1	258.217	-1.69417	0.199877	-8.4761	2.33e-17	7.27e-16	g29837.t1
g26804.t1	522.88	-1.2221	0.144251	-8.472	2.41e-17	7.52e-16	g26804.t1
g6212.t1	447.029	-1.56701	0.184998	-8.47042	2.45e-17	7.62e-16	g6212.t1
g44013.t1	3248.27	-1.05783	0.124974	-8.46439	2.57e-17	8.01e-16	g44013.t1
g17983.t1	2282.31	-1.14459	0.135261	-8.46213	2.63e-17	8.16e-16	g17983.t1
g16040.t1	464.768	-1.7202	0.203486	-8.45364	2.82e-17	8.77e-16	g16040.t1
g43434.t1	439.857	-1.8301	0.216492	-8.4534	2.83e-17	8.78e-16	g43434.t1
g37939.t1	2373.1	1.13641	0.134579	8.44422	3.06e-17	9.48e-16	g37939.t1
g30569.t1	18959.8	-1.44729	0.171449	-8.44156	3.13e-17	9.69e-16	g30569.t1
g8250.t1	870.694	1.46233	0.173258	8.44016	3.17e-17	9.79e-16	g8250.t1
g26241.t1	396.962	-1.66839	0.197744	-8.4371	3.25e-17	1e-15	g26241.t1
g27241.t1	31916	1.43329	0.169898	8.43618	3.28e-17	1.01e-15	g27241.t1
g30566.t1	506.813	1.18753	0.140791	8.43467	3.32e-17	1.02e-15	g30566.t1
g32117.t1	1031.79	1.89922	0.225297	8.42983	3.46e-17	1.07e-15	g32117.t1
g27268.t1	855.507	1.65309	0.196214	8.42492	3.61e-17	1.11e-15	g27268.t1
g37850.t1	507.438	-1.0731	0.127394	-8.4235	3.65e-17	1.12e-15	g37850.t1
g29089.t1	6224.93	1.64045	0.195063	8.40985	4.11e-17	1.26e-15	g29089.t1
g42933.t1	1114.18	-1.52404	0.181254	-8.40831	4.16e-17	1.27e-15	g42933.t1
g9184.t1	490.255	1.32237	0.157412	8.40073	4.44e-17	1.35e-15	g9184.t1
g9747.t1	471.364	-1.30837	0.156004	-8.38679	5e-17	1.52e-15	g9747.t1
g39718.t1	950.399	-1.66283	0.19833	-8.38418	5.11e-17	1.55e-15	g39718.t1
g12275.t1	581.793	-1.64509	0.196248	-8.38271	5.17e-17	1.57e-15	g12275.t1
g15353.t1	409.761	-1.28846	0.153833	-8.3757	5.49e-17	1.66e-15	g15353.t1
g26964.t1	350.851	1.30739	0.156228	8.36849	5.84e-17	1.76e-15	g26964.t1
g16227.t1	903.455	1.00895	0.120592	8.36661	5.93e-17	1.79e-15	g16227.t1
g14095.t1	125.06	-10.6623	1.27437	-8.36671	5.93e-17	1.79e-15	g14095.t1
g34872.t1	515.697	-1.28991	0.154339	-8.35765	6.4e-17	1.93e-15	g34872.t1
g32911.t1	514.251	1.21975	0.145998	8.35459	6.57e-17	1.98e-15	g32911.t1
g6517.t1	160.513	-2.07977	0.248987	-8.35292	6.66e-17	2e-15	g6517.t1
g20223.t1	38511.7	-2.15684	0.258252	-8.35171	6.73e-17	2.02e-15	g20223.t1
g19560.t1	178.506	-4.27018	0.511411	-8.3498	6.84e-17	2.05e-15	g19560.t1
g23036.t1	552.064	-1.86871	0.223887	-8.34668	7.02e-17	2.11e-15	g23036.t1
g23809.t1	897.579	-1.44824	0.173519	-8.34625	7.05e-17	2.11e-15	g23809.t1
g26521.t1	1132.55	-2.00083	0.239965	-8.338	7.56e-17	2.26e-15	g26521.t1
g11974.t1	531.168	1.42924	0.171487	8.33441	7.79e-17	2.33e-15	g11974.t1
g3880.t1	709.199	-1.6786	0.201496	-8.33064	8.04e-17	2.4e-15	g3880.t1
g402.t1	381.751	2.27526	0.273387	8.32251	8.61e-17	2.57e-15	g402.t1
g14765.t1	987.399	-1.03319	0.124193	-8.31924	8.85e-17	2.64e-15	g14765.t1
g29637.t1	277.129	-1.50423	0.180892	-8.31564	9.13e-17	2.72e-15	g29637.t1
g15253.t1	5429.82	-1.94911	0.23443	-8.31425	9.23e-17	2.74e-15	g15253.t1
g41969.t1	2350.32	-1.15548	0.139001	-8.31279	9.35e-17	2.78e-15	g41969.t1
g34351.t1	183.696	2.4725	0.297593	8.30832	9.71e-17	2.88e-15	g34351.t1
g31101.t1	438.855	-1.98727	0.239218	-8.30733	9.79e-17	2.9e-15	g31101.t1
g35141.t1	129.207	2.15418	0.259457	8.30265	1.02e-16	3.01e-15	g35141.t1
g7848.t1	509.441	-1.45738	0.175539	-8.30232	1.02e-16	3.02e-15	g7848.t1
g11043.t1	1398.59	-2.17352	0.261852	-8.30057	1.04e-16	3.06e-15	g11043.t1
g7977.t1	273.843	1.56715	0.188813	8.3	1.04e-16	3.07e-15	g7977.t1
g8952.t1	1029.71	-1.6999	0.204836	-8.29885	1.05e-16	3.1e-15	g8952.t1
g44163.t1	401.775	-1.75333	0.211295	-8.29799	1.06e-16	3.12e-15	g44163.t1
g24381.t1	1552.33	1.80116	0.217096	8.29658	1.07e-16	3.15e-15	g24381.t1
g41618.t1	23073.8	1.18904	0.143319	8.29649	1.07e-16	3.15e-15	g41618.t1
g39807.t1	407.037	-1.4778	0.178139	-8.29579	1.08e-16	3.17e-15	g39807.t1
g16493.t1	2364.61	-1.99373	0.24053	-8.28889	1.14e-16	3.35e-15	g16493.t1
g38998.t1	1869.46	-1.12329	0.135531	-8.2881	1.15e-16	3.37e-15	g38998.t1
g1703.t1	3896.68	-1.16739	0.141001	-8.27925	1.24e-16	3.62e-15	g1703.t1
g42549.t1	915.105	-1.25376	0.151599	-8.27021	1.34e-16	3.9e-15	g42549.t1
g39655.t1	3945.76	-1.45928	0.176493	-8.26823	1.36e-16	3.96e-15	g39655.t1
g8691.t1	1024.04	-1.77455	0.214632	-8.26789	1.36e-16	3.97e-15	g8691.t1
g31263.t1	1228.62	-1.07346	0.129895	-8.26402	1.41e-16	4.1e-15	g31263.t1
g20162.t1	977.713	-1.55834	0.188578	-8.26361	1.41e-16	4.11e-15	g20162.t1
g20733.t1	373.498	-2.20557	0.26692	-8.26303	1.42e-16	4.12e-15	g20733.t1
g35343.t1	1010.08	1.09942	0.133052	8.26308	1.42e-16	4.12e-15	g35343.t1
g33.t1	812.205	-1.36155	0.164956	-8.254	1.53e-16	4.44e-15	g33.t1
g22769.t2	135.568	10.2863	1.24631	8.25347	1.54e-16	4.46e-15	g22769.t2
g44876.t1	700.587	-1.5543	0.188378	-8.25097	1.57e-16	4.55e-15	g44876.t1
g11866.t1	1048.7	-1.27634	0.154837	-8.24312	1.68e-16	4.85e-15	g11866.t1
g17006.t1	2748.6	-1.20571	0.146417	-8.2348	1.8e-16	5.19e-15	g17006.t1
g14033.t1	1677.15	-1.42637	0.173246	-8.23318	1.82e-16	5.25e-15	g14033.t1
g33136.t1	272.765	-1.5168	0.184353	-8.2277	1.91e-16	5.5e-15	g33136.t1
g24045.t1	527.156	1.20401	0.146361	8.22626	1.93e-16	5.55e-15	g24045.t1
g34396.t1	226.068	-1.60918	0.195616	-8.2262	1.93e-16	5.55e-15	g34396.t1
g31504.t1	408.863	-1.12136	0.136328	-8.22544	1.94e-16	5.58e-15	g31504.t1
g43911.t1	450.115	-1.85075	0.225026	-8.22458	1.96e-16	5.62e-15	g43911.t1
g30060.t1	530.1	-2.19702	0.267284	-8.2198	2.04e-16	5.84e-15	g30060.t1
g25070.t1	426.594	-2.14647	0.261337	-8.21339	2.15e-16	6.16e-15	g25070.t1
g20730.t1	424.629	-1.58151	0.192664	-8.20861	2.24e-16	6.39e-15	g20730.t1
g29795.t1	286.997	-1.89556	0.231028	-8.20486	2.31e-16	6.59e-15	g29795.t1
g27226.t1	662.032	-1.22715	0.149571	-8.20449	2.32e-16	6.61e-15	g27226.t1
g28101.t1	545.154	-1.54977	0.189108	-8.19516	2.5e-16	7.13e-15	g28101.t1
g42983.t1	1300.43	-1.35851	0.165923	-8.1876	2.66e-16	7.59e-15	g42983.t1
g4651.t1	630.016	-2.11357	0.25822	-8.18516	2.72e-16	7.74e-15	g4651.t1
g16441.t1	2292.47	-1.1191	0.136737	-8.18433	2.74e-16	7.78e-15	g16441.t1
g37889.t1	304.425	-1.32955	0.162454	-8.18416	2.74e-16	7.79e-15	g37889.t1
g28427.t1	300.936	-1.74878	0.213717	-8.1827	2.78e-16	7.87e-15	g28427.t1
g24287.t1	611.075	-1.75837	0.214933	-8.18099	2.82e-16	7.98e-15	g24287.t1
g4781.t1	118.51	2.14915	0.262726	8.1802	2.83e-16	8.02e-15	g4781.t1
g14083.t1	961.647	-1.54062	0.188355	-8.17933	2.85e-16	8.07e-15	g14083.t1
g789.t1	1990.24	-1.36167	0.166614	-8.17263	3.02e-16	8.53e-15	g789.t1
g15661.t1	1343.6	-1.36452	0.167034	-8.16915	3.11e-16	8.77e-15	g15661.t1
g19123.t1	867.397	-1.54282	0.188936	-8.1658	3.19e-16	9.01e-15	g19123.t1
g37627.t1	1473.4	-1.39434	0.170812	-8.16301	3.27e-16	9.21e-15	g37627.t1
g78.t1	1322.76	-1.01939	0.125015	-8.15414	3.52e-16	9.9e-15	g78.t1
g39601.t1	1042.57	-1.61527	0.19816	-8.15134	3.6e-16	1.01e-14	g39601.t1
g26564.t1	1146.4	-1.28427	0.157561	-8.15096	3.61e-16	1.01e-14	g26564.t1
g30083.t1	651.417	-2.21877	0.272695	-8.13646	4.07e-16	1.14e-14	g30083.t1
g32027.t1	601.554	-1.21459	0.149331	-8.13356	4.17e-16	1.17e-14	g32027.t1
g39530.t2	708.159	-1.25876	0.154777	-8.1327	4.2e-16	1.17e-14	g39530.t2
g4069.t1	471.333	-1.70131	0.209228	-8.13138	4.24e-16	1.19e-14	g4069.t1
g30128.t1	2314.58	-1.30805	0.160972	-8.12591	4.44e-16	1.24e-14	g30128.t1
g1402.t1	615.41	-1.19603	0.147212	-8.12455	4.49e-16	1.25e-14	g1402.t1
g39007.t1	617.564	-1.31516	0.161872	-8.12471	4.48e-16	1.25e-14	g39007.t1
g16224.t1	192.061	-1.49143	0.183645	-8.12126	4.61e-16	1.28e-14	g16224.t1
g17757.t1	296.019	-1.7649	0.217501	-8.11443	4.88e-16	1.36e-14	g17757.t1
g27700.t1	316.162	-1.80915	0.223227	-8.10452	5.3e-16	1.47e-14	g27700.t1
g39411.t1	319.817	-1.97241	0.243474	-8.10109	5.45e-16	1.51e-14	g39411.t1
g9182.t1	630.346	1.22872	0.151688	8.10031	5.48e-16	1.52e-14	g9182.t1
g2540.t1	582.221	-1.72498	0.212958	-8.10006	5.49e-16	1.52e-14	g2540.t1
g1723.t1	616.399	-1.65995	0.205144	-8.09162	5.89e-16	1.62e-14	g1723.t1
g974.t1	526.675	-1.24894	0.154377	-8.09023	5.96e-16	1.64e-14	g974.t1
g16272.t1	574.299	1.05716	0.130714	8.08755	6.09e-16	1.67e-14	g16272.t1
g7736.t1	9959.41	-1.49707	0.185281	-8.07998	6.48e-16	1.78e-14	g7736.t1
g24043.t1	714.719	1.31611	0.162888	8.07987	6.48e-16	1.78e-14	g24043.t1
g10562.t1	554.521	-1.36246	0.168637	-8.07926	6.52e-16	1.79e-14	g10562.t1
g12157.t1	270.7	-1.56193	0.193367	-8.07753	6.61e-16	1.81e-14	g12157.t1
g2944.t1	15074.3	1.5908	0.197069	8.07229	6.9e-16	1.88e-14	g2944.t1
g38211.t1	838.201	-1.2052	0.149316	-8.07148	6.94e-16	1.9e-14	g38211.t1
g33575.t1	313.48	-1.80864	0.224136	-8.0694	7.06e-16	1.93e-14	g33575.t1
g5374.t1	450.561	-1.31224	0.162628	-8.06899	7.09e-16	1.93e-14	g5374.t1
g36484.t1	274.734	-1.68941	0.209436	-8.06647	7.24e-16	1.97e-14	g36484.t1
g16211.t1	506.298	-2.109	0.261657	-8.06017	7.62e-16	2.07e-14	g16211.t1
g32416.t1	2488.96	-1.20246	0.149198	-8.05954	7.66e-16	2.08e-14	g32416.t1
g33659.t1	1557.71	-1.3355	0.165749	-8.05737	7.8e-16	2.11e-14	g33659.t1
g22427.t1	838.448	-1.45016	0.179984	-8.05716	7.81e-16	2.12e-14	g22427.t1
g6109.t1	1165.69	-1.24987	0.155219	-8.05232	8.12e-16	2.2e-14	g6109.t1
g18667.t1	462.247	-1.61225	0.200357	-8.04688	8.49e-16	2.3e-14	g18667.t1
g2632.t1	579.855	1.11029	0.138025	8.04418	8.68e-16	2.35e-14	g2632.t1
g5015.t1	560.73	1.21286	0.15084	8.04072	8.93e-16	2.41e-14	g5015.t1
g17864.t1	1680.36	-1.68907	0.210093	-8.03966	9.01e-16	2.43e-14	g17864.t1
g44564.t1	798.344	-1.36205	0.169459	-8.0376	9.16e-16	2.47e-14	g44564.t1
g5546.t1	7329	-1.034	0.128754	-8.03081	9.68e-16	2.61e-14	g5546.t1
g10770.t2	3666.66	-1.22713	0.153049	-8.01787	1.08e-15	2.89e-14	g10770.t2
g4363.t1	778.569	-1.23681	0.154304	-8.01541	1.1e-15	2.95e-14	g4363.t1
g30780.t1	393.682	-1.37485	0.171655	-8.00937	1.15e-15	3.09e-14	g30780.t1
g44837.t1	86.7505	-5.9285	0.740739	-8.00348	1.21e-15	3.24e-14	g44837.t1
g17820.t1	1511.03	-1.22037	0.152491	-8.00292	1.22e-15	3.26e-14	g17820.t1
g4747.t1	255.729	-1.61727	0.202092	-8.00268	1.22e-15	3.26e-14	g4747.t1
g27881.t1	2367.07	-1.87932	0.234848	-8.00228	1.22e-15	3.26e-14	g27881.t1
g29272.t1	450.343	-1.3328	0.166555	-8.00218	1.22e-15	3.26e-14	g29272.t1
g7124.t1	588.714	-1.03153	0.128909	-8.00204	1.22e-15	3.26e-14	g7124.t1
g20874.t1	186.076	-1.75122	0.219155	-7.99079	1.34e-15	3.57e-14	g20874.t1
g45695.t1	482.235	-1.58875	0.198839	-7.99013	1.35e-15	3.59e-14	g45695.t1
g27298.t1	233.809	-2.57016	0.321676	-7.98989	1.35e-15	3.59e-14	g27298.t1
g31697.t1	765.602	-1.6339	0.204503	-7.98963	1.35e-15	3.59e-14	g31697.t1
g5788.t1	775.329	-1.47486	0.184654	-7.98713	1.38e-15	3.66e-14	g5788.t1
g42846.t1	616.203	-2.44089	0.305723	-7.98397	1.42e-15	3.76e-14	g42846.t1
g1632.t1	970.454	1.05808	0.132563	7.98169	1.44e-15	3.82e-14	g1632.t1
g33545.t1	1543.96	-1.37966	0.172952	-7.97713	1.5e-15	3.95e-14	g33545.t1
g23054.t1	269.726	-1.92601	0.241529	-7.97426	1.53e-15	4.04e-14	g23054.t1
g16562.t1	683.435	-1.64517	0.206606	-7.96283	1.68e-15	4.42e-14	g16562.t1
g22422.t1	540.835	1.40179	0.17604	7.9629	1.68e-15	4.42e-14	g22422.t1
g20378.t1	523.151	-1.50523	0.189071	-7.96115	1.7e-15	4.48e-14	g20378.t1
g2579.t1	25211.6	-1.99259	0.250351	-7.95919	1.73e-15	4.54e-14	g2579.t1
g36756.t1	255.959	-1.59294	0.200206	-7.95652	1.77e-15	4.64e-14	g36756.t1
g42785.t1	1316.04	-1.10597	0.139015	-7.95573	1.78e-15	4.66e-14	g42785.t1
g131.t1	567.583	-1.47125	0.184989	-7.95314	1.82e-15	4.76e-14	g131.t1
g24975.t1	531.138	-1.89843	0.238711	-7.95282	1.82e-15	4.77e-14	g24975.t1
g20001.t1	1728.84	-1.14938	0.144649	-7.94594	1.93e-15	5.03e-14	g20001.t1
g19273.t1	305.022	1.61526	0.203427	7.94024	2.02e-15	5.26e-14	g19273.t1
g39628.t1	3382.36	1.03245	0.13007	7.93766	2.06e-15	5.36e-14	g39628.t1
g13871.t1	561.484	-1.12287	0.141639	-7.92767	2.23e-15	5.79e-14	g13871.t1
g25865.t1	457.083	-1.96717	0.248385	-7.91987	2.38e-15	6.15e-14	g25865.t1
g38609.t1	431.279	-1.89464	0.239396	-7.91425	2.49e-15	6.43e-14	g38609.t1
g9153.t1	893.572	-1.18992	0.150677	-7.89718	2.85e-15	7.36e-14	g9153.t1
g24890.t1	539.285	-1.63923	0.207654	-7.89402	2.93e-15	7.54e-14	g24890.t1
g35002.t1	1016.68	-1.31579	0.166712	-7.89254	2.96e-15	7.62e-14	g35002.t1
g19229.t1	366.474	-1.47405	0.186851	-7.88894	3.05e-15	7.84e-14	g19229.t1
g24766.t1	709.072	1.44783	0.183543	7.88824	3.06e-15	7.88e-14	g24766.t1
g33657.t1	427.561	-1.3967	0.177128	-7.88526	3.14e-15	8.06e-14	g33657.t1
g30098.t1	2517.31	-1.41085	0.178951	-7.88401	3.17e-15	8.14e-14	g30098.t1
g4380.t1	358.521	-1.46545	0.186115	-7.8739	3.44e-15	8.81e-14	g4380.t1
g1878.t1	398.146	-1.79633	0.228164	-7.87301	3.46e-15	8.86e-14	g1878.t1
g3983.t1	237.242	-1.78693	0.227414	-7.85761	3.92e-15	1e-13	g3983.t1
g12087.t1	379.508	-2.102	0.267678	-7.85272	4.07e-15	1.04e-13	g12087.t1
g24364.t1	2936.32	1.41563	0.180286	7.85215	4.09e-15	1.04e-13	g24364.t1
g4090.t1	501.291	-1.59813	0.203577	-7.85025	4.15e-15	1.06e-13	g4090.t1
g26551.t1	766.912	-1.65348	0.21065	-7.8494	4.18e-15	1.06e-13	g26551.t1
g10541.t1	508.097	-1.62854	0.207558	-7.84623	4.29e-15	1.09e-13	g10541.t1
g29716.t1	332.126	-1.84436	0.235132	-7.84396	4.37e-15	1.11e-13	g29716.t1
g24881.t1	9503.58	-1.6548	0.210973	-7.84367	4.38e-15	1.11e-13	g24881.t1
g10199.t1	22529.9	1.23445	0.157393	7.84315	4.39e-15	1.11e-13	g10199.t1
g14694.t1	1073.54	-1.04568	0.133364	-7.84083	4.48e-15	1.13e-13	g14694.t1
g21390.t1	2968.57	-1.12126	0.143034	-7.8391	4.54e-15	1.15e-13	g21390.t1
g20511.t1	1501.53	-1.39273	0.177734	-7.83606	4.65e-15	1.18e-13	g20511.t1
g34194.t1	367.045	-1.1296	0.144209	-7.83304	4.76e-15	1.2e-13	g34194.t1
g42226.t1	700.042	-2.07365	0.264772	-7.83184	4.81e-15	1.21e-13	g42226.t1
g2532.t1	480.966	-1.30508	0.166661	-7.83078	4.85e-15	1.22e-13	g2532.t1
g17731.t1	1622.53	-1.14484	0.146509	-7.81407	5.54e-15	1.39e-13	g17731.t1
g27192.t1	276.764	-2.24176	0.286932	-7.81285	5.59e-15	1.41e-13	g27192.t1
g35860.t1	3607.1	-1.19714	0.153232	-7.81259	5.6e-15	1.41e-13	g35860.t1
g26991.t1	1130.76	-1.11069	0.142188	-7.8114	5.66e-15	1.42e-13	g26991.t1
g7099.t1	2169.2	1.11622	0.142935	7.80929	5.75e-15	1.44e-13	g7099.t1
g7869.t1	505.716	-1.45535	0.186451	-7.80552	5.93e-15	1.48e-13	g7869.t1
g26300.t1	764.037	-2.65829	0.340869	-7.79856	6.26e-15	1.57e-13	g26300.t1
g27577.t1	2747.34	-2.61104	0.335042	-7.79317	6.54e-15	1.63e-13	g27577.t1
g20140.t1	4076.91	-1.02829	0.131954	-7.7928	6.55e-15	1.64e-13	g20140.t1
g40534.t1	297.272	-2.20479	0.282982	-7.79126	6.63e-15	1.65e-13	g40534.t1
g42177.t1	233.386	-1.63262	0.209549	-7.79114	6.64e-15	1.66e-13	g42177.t1
g26581.t1	177.818	-1.52502	0.195798	-7.78874	6.77e-15	1.69e-13	g26581.t1
g11143.t1	380.56	-1.11119	0.142714	-7.78614	6.91e-15	1.72e-13	g11143.t1
g27713.t1	333.357	-1.54133	0.197967	-7.78579	6.93e-15	1.72e-13	g27713.t1
g223.t1	18095.1	1.19537	0.153623	7.78119	7.18e-15	1.78e-13	g223.t1
g9018.t1	674.793	-1.10644	0.142205	-7.7806	7.22e-15	1.79e-13	g9018.t1
g26253.t1	379.753	-1.07645	0.138384	-7.77867	7.33e-15	1.82e-13	g26253.t1
g34677.t1	601.152	-1.20634	0.155124	-7.77659	7.45e-15	1.84e-13	g34677.t1
g36101.t1	223.903	-2.21505	0.285098	-7.76944	7.88e-15	1.95e-13	g36101.t1
g43053.t1	255.596	1.5425	0.198693	7.76319	8.28e-15	2.04e-13	g43053.t1
g16595.t1	486.952	-1.39438	0.179853	-7.75287	8.98e-15	2.21e-13	g16595.t1
g6241.t1	1471.45	-1.17179	0.151222	-7.74881	9.28e-15	2.28e-13	g6241.t1
g1345.t1	171.137	-2.38505	0.307954	-7.74482	9.57e-15	2.35e-13	g1345.t1
g35433.t1	442.162	-1.423	0.18387	-7.73915	1e-14	2.45e-13	g35433.t1
g39950.t1	363.693	-1.23086	0.159433	-7.72025	1.16e-14	2.84e-13	g39950.t1
g42496.t1	632.218	-1.5058	0.195066	-7.71945	1.17e-14	2.85e-13	g42496.t1
g15169.t1	593.847	-1.22394	0.158614	-7.71646	1.2e-14	2.92e-13	g15169.t1
g44551.t1	582.004	1.07694	0.139713	7.70822	1.28e-14	3.11e-13	g44551.t1
g10738.t1	495.157	-1.35779	0.176212	-7.7054	1.3e-14	3.17e-13	g10738.t1
g44272.t3	347.219	-1.71151	0.222135	-7.70482	1.31e-14	3.18e-13	g44272.t3
g15488.t1	1278.66	-1.47903	0.19198	-7.70408	1.32e-14	3.2e-13	g15488.t1
g12402.t1	761.097	-1.32984	0.17269	-7.70073	1.35e-14	3.28e-13	g12402.t1
g21445.t1	404.394	-1.48546	0.192985	-7.69728	1.39e-14	3.37e-13	g21445.t1
g11256.t1	1204.66	-2.13552	0.277511	-7.69525	1.41e-14	3.42e-13	g11256.t1
g42212.t1	1034.79	-1.32274	0.171929	-7.69353	1.43e-14	3.46e-13	g42212.t1
g40499.t1	457.582	-1.07525	0.139775	-7.69266	1.44e-14	3.48e-13	g40499.t1
g25772.t1	2176.64	-1.03588	0.134668	-7.69214	1.45e-14	3.49e-13	g25772.t1
g30223.t1	1463.6	-1.14665	0.149167	-7.68698	1.51e-14	3.63e-13	g30223.t1
g22045.t1	2368.36	-1.12549	0.146481	-7.6835	1.55e-14	3.72e-13	g22045.t1
g28152.t1	348.483	-1.38699	0.180602	-7.67981	1.59e-14	3.83e-13	g28152.t1
g5460.t1	5319.91	1.23054	0.16025	7.67887	1.61e-14	3.86e-13	g5460.t1
g34970.t1	438.737	-1.22754	0.159892	-7.67731	1.62e-14	3.9e-13	g34970.t1
g41731.t1	2854.6	-1.05337	0.137241	-7.67529	1.65e-14	3.96e-13	g41731.t1
g14049.t1	1243.44	-1.91266	0.249238	-7.674	1.67e-14	3.99e-13	g14049.t1
g30260.t1	252.965	1.84962	0.241099	7.67164	1.7e-14	4.07e-13	g30260.t1
g39318.t1	1195.4	-1.26717	0.1653	-7.66587	1.78e-14	4.25e-13	g39318.t1
g28699.t1	269.805	-1.36429	0.177979	-7.66546	1.78e-14	4.26e-13	g28699.t1
g8617.t1	526.47	-1.21314	0.158447	-7.65642	1.91e-14	4.56e-13	g8617.t1
g24414.t1	1415.39	-1.4593	0.19061	-7.65595	1.92e-14	4.58e-13	g24414.t1
g222.t1	701.099	-1.2963	0.16935	-7.65458	1.94e-14	4.62e-13	g222.t1
g15535.t1	191.622	-1.66038	0.216914	-7.65455	1.94e-14	4.62e-13	g15535.t1
g12479.t1	649.85	-1.43621	0.187708	-7.65131	1.99e-14	4.73e-13	g12479.t1
g36392.t1	293.991	1.31305	0.171646	7.64977	2.01e-14	4.79e-13	g36392.t1
g18490.t2	290.258	-1.71814	0.224733	-7.64523	2.09e-14	4.95e-13	g18490.t2
g3605.t1	671.914	-1.46574	0.191725	-7.64504	2.09e-14	4.95e-13	g3605.t1
g16400.t1	3116.31	-1.64458	0.215175	-7.64301	2.12e-14	5.03e-13	g16400.t1
g8079.t2	32342.2	1.61101	0.210809	7.64204	2.14e-14	5.06e-13	g8079.t2
g34347.t1	350.633	-1.10676	0.144913	-7.63743	2.22e-14	5.24e-13	g34347.t1
g39864.t1	511.256	-1.87873	0.246121	-7.63335	2.29e-14	5.4e-13	g39864.t1
g39084.t1	1186.41	1.11618	0.146238	7.63259	2.3e-14	5.43e-13	g39084.t1
g8376.t1	7306.37	-1.30011	0.170381	-7.63061	2.34e-14	5.51e-13	g8376.t1
g5807.t1	841.514	-1.68317	0.220598	-7.63005	2.35e-14	5.53e-13	g5807.t1
g5228.t1	624.803	-1.22714	0.160846	-7.62929	2.36e-14	5.56e-13	g5228.t1
g28961.t1	487.5	-1.28183	0.168125	-7.62424	2.45e-14	5.77e-13	g28961.t1
g30463.t1	944.058	-1.72441	0.226228	-7.62245	2.49e-14	5.84e-13	g30463.t1
g24661.t1	331.878	-1.33457	0.175105	-7.62154	2.51e-14	5.88e-13	g24661.t1
g12965.t1	2229.35	-1.67031	0.219182	-7.62062	2.52e-14	5.91e-13	g12965.t1
g2595.t1	224.543	-2.41037	0.316404	-7.61801	2.58e-14	6.03e-13	g2595.t1
g23194.t1	2387.99	1.1228	0.147461	7.61422	2.65e-14	6.19e-13	g23194.t1
g23586.t1	1996.17	-1.62633	0.213598	-7.61396	2.66e-14	6.2e-13	g23586.t1
g9469.t1	179.402	-1.70288	0.223658	-7.61378	2.66e-14	6.2e-13	g9469.t1
g31289.t1	418.665	-1.44286	0.189548	-7.61213	2.7e-14	6.27e-13	g31289.t1
g33053.t1	236.269	-1.60961	0.211721	-7.60251	2.9e-14	6.74e-13	g33053.t1
g19686.t1	13979.1	1.01499	0.133536	7.60084	2.94e-14	6.82e-13	g19686.t1
g48.t1	541.001	-1.14146	0.150226	-7.59828	3e-14	6.96e-13	g48.t1
g43469.t1	1099.49	-1.43865	0.189489	-7.59228	3.14e-14	7.27e-13	g43469.t1
g14009.t1	262.987	1.51254	0.199226	7.59208	3.15e-14	7.27e-13	g14009.t1
g20547.t1	701.074	-1.43635	0.189414	-7.58313	3.37e-14	7.79e-13	g20547.t1
g39848.t1	588.251	-1.04065	0.137273	-7.58088	3.43e-14	7.92e-13	g39848.t1
g2548.t1	1246.8	-1.03819	0.136975	-7.57942	3.47e-14	7.99e-13	g2548.t1
g23910.t1	510.888	-1.2212	0.16112	-7.57948	3.47e-14	7.99e-13	g23910.t1
g30036.t1	545.133	-2.48215	0.32752	-7.57862	3.49e-14	8.03e-13	g30036.t1
g37947.t1	624.897	-1.15165	0.151986	-7.57737	3.53e-14	8.1e-13	g37947.t1
g36204.t1	1196.85	-1.82269	0.240587	-7.57601	3.56e-14	8.18e-13	g36204.t1
g21890.t1	333.624	-1.9446	0.256769	-7.57335	3.64e-14	8.34e-13	g21890.t1
g44024.t1	623.713	-1.81262	0.23937	-7.57248	3.66e-14	8.39e-13	g44024.t1
g35129.t1	976.526	-1.05208	0.138946	-7.57188	3.68e-14	8.42e-13	g35129.t1
g58.t1	248.893	-1.86832	0.246899	-7.56713	3.82e-14	8.73e-13	g58.t1
g30411.t1	1183.66	-1.05144	0.13895	-7.56699	3.82e-14	8.73e-13	g30411.t1
g25588.t1	550.968	-1.29175	0.170801	-7.56287	3.94e-14	9e-13	g25588.t1
g9715.t1	2734.11	-1.00968	0.133536	-7.56111	4e-14	9.12e-13	g9715.t1
g28160.t1	1634.45	-1.14283	0.151193	-7.55878	4.07e-14	9.27e-13	g28160.t1
g37053.t1	611.521	-1.22658	0.162304	-7.55731	4.11e-14	9.37e-13	g37053.t1
g2564.t1	629.397	-1.43947	0.190517	-7.55556	4.17e-14	9.49e-13	g2564.t1
g8039.t1	496.925	1.48884	0.197147	7.5519	4.29e-14	9.75e-13	g8039.t1
g16508.t2	566.587	-1.92187	0.254546	-7.55019	4.35e-14	9.87e-13	g16508.t2
g13720.t1	1539.53	1.39595	0.185115	7.541	4.66e-14	1.06e-12	g13720.t1
g30387.t3	6622.23	1.28455	0.170445	7.53645	4.83e-14	1.09e-12	g30387.t3
g22706.t1	295.987	-1.40387	0.18637	-7.53275	4.97e-14	1.12e-12	g22706.t1
g40681.t1	2896.54	-1.03498	0.137442	-7.53029	5.06e-14	1.14e-12	g40681.t1
g32440.t1	262.599	-2.02321	0.268855	-7.52526	5.26e-14	1.19e-12	g32440.t1
g14948.t1	367.998	-1.79221	0.23822	-7.52334	5.34e-14	1.2e-12	g14948.t1
g45295.t1	386.012	-1.62209	0.215618	-7.52295	5.36e-14	1.21e-12	g45295.t1
g9237.t1	2237.62	-1.76929	0.235209	-7.52221	5.39e-14	1.21e-12	g9237.t1
g32344.t1	622.193	-1.05028	0.139682	-7.51911	5.52e-14	1.24e-12	g32344.t1
g43615.t1	491.387	-2.12425	0.282646	-7.51558	5.67e-14	1.27e-12	g43615.t1
g23110.t1	643.431	-1.55318	0.206831	-7.50942	5.94e-14	1.33e-12	g23110.t1
g2467.t1	1626.26	-1.87317	0.249458	-7.50895	5.96e-14	1.33e-12	g2467.t1
g22574.t1	491.578	-1.70574	0.227177	-7.5084	5.99e-14	1.34e-12	g22574.t1
g41160.t1	216.487	-1.42006	0.189172	-7.50669	6.06e-14	1.35e-12	g41160.t1
g35800.t1	55.6811	-9.49552	1.26616	-7.49948	6.41e-14	1.43e-12	g35800.t1
g31027.t1	418.717	-1.39578	0.186195	-7.49632	6.56e-14	1.46e-12	g31027.t1
g12509.t1	1962.88	-1.87003	0.249657	-7.49042	6.87e-14	1.53e-12	g12509.t1
g39607.t1	151.388	-1.51685	0.202721	-7.48245	7.29e-14	1.62e-12	g39607.t1
g12870.t2	67.1706	9.27298	1.24001	7.47814	7.54e-14	1.68e-12	g12870.t2
g7419.t1	4400.63	-1.77395	0.237569	-7.46711	8.2e-14	1.82e-12	g7419.t1
g1877.t1	258.331	-2.4994	0.33496	-7.46181	8.53e-14	1.89e-12	g1877.t1
g2966.t1	1080.66	-1.77913	0.238564	-7.45768	8.81e-14	1.95e-12	g2966.t1
g15067.t1	637.07	-1.09288	0.146561	-7.45688	8.86e-14	1.96e-12	g15067.t1
g27429.t1	236.328	-1.56552	0.210033	-7.45368	9.08e-14	2.01e-12	g27429.t1
g40372.t1	2904.73	-1.26585	0.169833	-7.45351	9.09e-14	2.01e-12	g40372.t1
g8012.t1	137.986	-2.39136	0.320996	-7.44979	9.35e-14	2.06e-12	g8012.t1
g17606.t2	679.882	1.24226	0.166778	7.4486	9.43e-14	2.08e-12	g17606.t2
g989.t1	474.42	-1.92143	0.258083	-7.44502	9.69e-14	2.13e-12	g989.t1
g16798.t1	333.52	-1.56928	0.21078	-7.4451	9.69e-14	2.13e-12	g16798.t1
g27288.t1	417.096	-1.80137	0.242172	-7.43841	1.02e-13	2.24e-12	g27288.t1
g26012.t1	553.404	-1.30001	0.174799	-7.43717	1.03e-13	2.26e-12	g26012.t1
g31957.t1	278.372	-1.21548	0.163582	-7.43043	1.08e-13	2.37e-12	g31957.t1
g44535.t1	1405.09	-1.35949	0.182972	-7.43002	1.09e-13	2.38e-12	g44535.t1
g23958.t1	557.785	-1.17585	0.158433	-7.42174	1.16e-13	2.53e-12	g23958.t1
g43933.t1	312.795	-1.62812	0.219418	-7.42019	1.17e-13	2.56e-12	g43933.t1
g4323.t1	168.364	-1.67866	0.226313	-7.41743	1.19e-13	2.61e-12	g4323.t1
g28871.t1	1110.01	-2.29505	0.309437	-7.41686	1.2e-13	2.62e-12	g28871.t1
g10256.t1	884.481	1.187	0.160099	7.41418	1.22e-13	2.67e-12	g10256.t1
g9993.t1	240.71	-2.6782	0.361341	-7.41185	1.25e-13	2.71e-12	g9993.t1
g44920.t1	436.235	-2.15694	0.291567	-7.39776	1.39e-13	3.01e-12	g44920.t1
g16130.t1	556.531	1.22231	0.165288	7.39505	1.41e-13	3.07e-12	g16130.t1
g14851.t1	607.892	-1.82168	0.246488	-7.39052	1.46e-13	3.17e-12	g14851.t1
g44520.t1	275.678	-1.53952	0.208308	-7.39061	1.46e-13	3.17e-12	g44520.t1
g12332.t1	179.628	-2.79503	0.378305	-7.3883	1.49e-13	3.22e-12	g12332.t1
g22337.t1	767.614	-1.03986	0.140804	-7.38514	1.52e-13	3.29e-12	g22337.t1
g9608.t1	4036.18	1.62825	0.220603	7.38093	1.57e-13	3.39e-12	g9608.t1
g11747.t1	922.342	-1.44931	0.196419	-7.37863	1.6e-13	3.45e-12	g11747.t1
g31526.t1	190.336	-1.42833	0.19369	-7.3743	1.65e-13	3.56e-12	g31526.t1
g19916.t1	355.328	-1.90365	0.258159	-7.37397	1.66e-13	3.56e-12	g19916.t1
g38137.t1	476.614	-1.4083	0.190985	-7.37389	1.66e-13	3.56e-12	g38137.t1
g3973.t1	1728.3	1.1035	0.149688	7.37198	1.68e-13	3.61e-12	g3973.t1
g16476.t1	103.822	2.44999	0.332354	7.37164	1.69e-13	3.62e-12	g16476.t1
g41674.t1	1797.96	-1.23372	0.167375	-7.37097	1.69e-13	3.63e-12	g41674.t1
g4207.t1	236.872	-1.50537	0.204267	-7.36962	1.71e-13	3.67e-12	g4207.t1
g741.t1	682.029	-1.391	0.188759	-7.36918	1.72e-13	3.68e-12	g741.t1
g27290.t1	125.924	-2.02843	0.275614	-7.35965	1.84e-13	3.94e-12	g27290.t1
g1189.t1	242.5	-1.602	0.217785	-7.35588	1.9e-13	4.05e-12	g1189.t1
g19612.t1	356.349	-1.33889	0.182025	-7.35553	1.9e-13	4.06e-12	g19612.t1
g41787.t1	236.798	-1.64477	0.223664	-7.35375	1.93e-13	4.11e-12	g41787.t1
g11480.t1	482.522	-1.86892	0.254242	-7.35093	1.97e-13	4.18e-12	g11480.t1
g41584.t1	1192.1	-1.0249	0.139426	-7.35087	1.97e-13	4.18e-12	g41584.t1
g15023.t1	492.484	1.21077	0.16474	7.3496	1.99e-13	4.22e-12	g15023.t1
g29389.t1	307.052	-1.26806	0.172609	-7.34644	2.04e-13	4.32e-12	g29389.t1
g21266.t1	628.694	-1.68129	0.229087	-7.33911	2.15e-13	4.56e-12	g21266.t1
g32528.t1	445.975	-1.23024	0.167721	-7.33501	2.22e-13	4.69e-12	g32528.t1
g17005.t1	5827.89	-1.16555	0.158909	-7.33468	2.22e-13	4.7e-12	g17005.t1
g33783.t1	305.087	1.42827	0.194791	7.33231	2.26e-13	4.78e-12	g33783.t1
g22096.t1	1991.48	1.29672	0.176938	7.32867	2.32e-13	4.91e-12	g22096.t1
g22640.t1	304.592	-1.84125	0.251278	-7.32757	2.34e-13	4.95e-12	g22640.t1
g15694.t1	303.656	-2.08542	0.284605	-7.32743	2.35e-13	4.95e-12	g15694.t1
g34577.t1	1189.54	-1.43627	0.196127	-7.32317	2.42e-13	5.1e-12	g34577.t1
g21570.t1	2295.92	-1.42431	0.194602	-7.31913	2.5e-13	5.24e-12	g21570.t1
g33888.t1	783.195	-1.05824	0.14467	-7.31488	2.58e-13	5.4e-12	g33888.t1
g14098.t1	268.931	-1.85202	0.253302	-7.31151	2.64e-13	5.54e-12	g14098.t1
g28077.t1	271.304	-1.69957	0.23257	-7.30777	2.72e-13	5.69e-12	g28077.t1
g12471.t1	7294.55	-1.18973	0.162853	-7.30553	2.76e-13	5.78e-12	g12471.t1
g1197.t1	1126.61	-1.90885	0.261308	-7.30499	2.77e-13	5.8e-12	g1197.t1
g26800.t1	392.822	-1.50014	0.205454	-7.30161	2.84e-13	5.93e-12	g26800.t1
g39684.t1	452.679	-1.17513	0.16099	-7.29941	2.89e-13	6.03e-12	g39684.t1
g20033.t1	1679.48	-1.42404	0.195111	-7.29861	2.91e-13	6.06e-12	g20033.t1
g14967.t1	122.798	2.47062	0.33857	7.29721	2.94e-13	6.12e-12	g14967.t1
g30901.t1	1340.04	-2.17296	0.298057	-7.29043	3.09e-13	6.43e-12	g30901.t1
g40634.t1	4023.12	-1.22289	0.167772	-7.289	3.12e-13	6.49e-12	g40634.t1
g26536.t1	130.046	-1.72062	0.236062	-7.28886	3.13e-13	6.49e-12	g26536.t1
g24188.t1	241.751	1.4931	0.204891	7.28728	3.16e-13	6.56e-12	g24188.t1
g38106.t1	77.4935	2.4112	0.330917	7.28642	3.18e-13	6.59e-12	g38106.t1
g23341.t1	414.259	-1.50485	0.206539	-7.28604	3.19e-13	6.61e-12	g23341.t1
g15761.t1	1439.79	-1.42708	0.195956	-7.28269	3.27e-13	6.77e-12	g15761.t1
g19547.t1	267.53	-1.58614	0.217848	-7.28095	3.31e-13	6.85e-12	g19547.t1
g26998.t1	1880	-1.16294	0.15974	-7.28016	3.33e-13	6.88e-12	g26998.t1
g1290.t1	446.964	-1.69434	0.23288	-7.2756	3.45e-13	7.1e-12	g1290.t1
g44669.t1	932.611	-1.34798	0.185696	-7.25908	3.9e-13	8e-12	g44669.t1
g34383.t1	153.848	1.85298	0.255402	7.25514	4.01e-13	8.23e-12	g34383.t1
g4398.t2	1022.8	-1.36591	0.188301	-7.25389	4.05e-13	8.29e-12	g4398.t2
g6612.t1	1792.29	-1.40391	0.193686	-7.24838	4.22e-13	8.63e-12	g6612.t1
g43976.t1	3191.48	-1.13651	0.156875	-7.24466	4.34e-13	8.85e-12	g43976.t1
g41266.t1	414.363	-1.59953	0.220911	-7.24062	4.47e-13	9.11e-12	g41266.t1
g28127.t1	261.213	-1.44042	0.198992	-7.2386	4.53e-13	9.23e-12	g28127.t1
g6513.t1	478.042	-2.36023	0.326162	-7.23636	4.61e-13	9.37e-12	g6513.t1
g11984.t1	1235.24	-1.62593	0.224695	-7.23615	4.62e-13	9.38e-12	g11984.t1
g16664.t1	472.448	-1.23901	0.171264	-7.23454	4.67e-13	9.49e-12	g16664.t1
g4897.t1	373.658	-1.78063	0.246186	-7.23285	4.73e-13	9.6e-12	g4897.t1
g32941.t1	1124.6	-1.1164	0.154483	-7.22668	4.95e-13	1e-11	g32941.t1
g12117.t1	1142.49	-1.60658	0.222365	-7.22496	5.01e-13	1.02e-11	g12117.t1
g18678.t1	2766.06	-1.13743	0.157445	-7.22428	5.04e-13	1.02e-11	g18678.t1
g43491.t1	457.504	-1.64533	0.227775	-7.2235	5.07e-13	1.03e-11	g43491.t1
g39941.t1	818.077	-1.33416	0.184702	-7.22332	5.07e-13	1.03e-11	g39941.t1
g36791.t1	712.359	-1.34605	0.18635	-7.22321	5.08e-13	1.03e-11	g36791.t1
g19814.t1	405.506	-1.28124	0.177382	-7.22304	5.08e-13	1.03e-11	g19814.t1
g26238.t1	4490.04	1.14853	0.159025	7.22231	5.11e-13	1.03e-11	g26238.t1
g27431.t1	206.155	-1.64484	0.227756	-7.22196	5.12e-13	1.03e-11	g27431.t1
g19800.t1	374.517	-1.84615	0.255642	-7.22163	5.14e-13	1.04e-11	g19800.t1
g5568.t1	54.4478	-9.46329	1.31044	-7.22146	5.14e-13	1.04e-11	g5568.t1
g46018.t1	880.053	1.71249	0.237205	7.21942	5.22e-13	1.05e-11	g46018.t1
g3870.t1	748.914	1.17873	0.163308	7.21781	5.28e-13	1.06e-11	g3870.t1
g3048.t1	528.958	-1.10378	0.15293	-7.21757	5.29e-13	1.06e-11	g3048.t1
g8624.t1	1102.4	-1.20439	0.166895	-7.21645	5.34e-13	1.07e-11	g8624.t1
g25319.t1	407.364	-1.44719	0.200582	-7.21495	5.4e-13	1.08e-11	g25319.t1
g5619.t1	336.054	-2.63549	0.365378	-7.21305	5.47e-13	1.1e-11	g5619.t1
g45394.t1	1703.62	-1.31889	0.183075	-7.20408	5.84e-13	1.17e-11	g45394.t1
g31859.t1	401.267	-1.17248	0.162814	-7.20136	5.96e-13	1.19e-11	g31859.t1
g36399.t1	535.96	-1.76388	0.24495	-7.20097	5.98e-13	1.19e-11	g36399.t1
g1650.t1	132.432	-2.46267	0.342043	-7.19989	6.03e-13	1.2e-11	g1650.t1
g190.t1	1153.54	-1.49201	0.20723	-7.19978	6.03e-13	1.2e-11	g190.t1
g10618.t1	910.513	-1.26593	0.175835	-7.19951	6.04e-13	1.2e-11	g10618.t1
g27356.t1	3692.35	-1.36452	0.189723	-7.19219	6.38e-13	1.27e-11	g27356.t1
g41014.t1	292.919	-1.47516	0.205108	-7.19213	6.38e-13	1.27e-11	g41014.t1
g42213.t1	968.868	-1.22007	0.169657	-7.19138	6.41e-13	1.27e-11	g42213.t1
g18924.t1	399.401	-1.37635	0.191497	-7.18733	6.61e-13	1.31e-11	g18924.t1
g15051.t1	387.336	-1.1553	0.160752	-7.18685	6.63e-13	1.31e-11	g15051.t1
g8261.t1	512.252	-1.33384	0.185597	-7.18676	6.63e-13	1.31e-11	g8261.t1
g23989.t1	1018.42	-1.06994	0.14889	-7.18613	6.67e-13	1.32e-11	g23989.t1
g15227.t1	115.222	-2.95844	0.411727	-7.18542	6.7e-13	1.32e-11	g15227.t1
g42070.t1	796.826	-1.43531	0.200203	-7.16927	7.54e-13	1.49e-11	g42070.t1
g18330.t1	1361.49	1.37596	0.192132	7.16153	7.98e-13	1.57e-11	g18330.t1
g42035.t1	794.162	-1.52184	0.212516	-7.16103	8.01e-13	1.58e-11	g42035.t1
g45252.t1	701.182	-1.04259	0.145615	-7.15991	8.07e-13	1.59e-11	g45252.t1
g4960.t1	125.982	-1.89449	0.264694	-7.15728	8.23e-13	1.62e-11	g4960.t1
g22149.t1	3586.05	-1.50333	0.210041	-7.15731	8.23e-13	1.62e-11	g22149.t1
g35025.t1	573.671	-1.70141	0.237714	-7.15739	8.22e-13	1.62e-11	g35025.t1
g36566.t1	194.626	1.43408	0.200392	7.15638	8.28e-13	1.63e-11	g36566.t1
g28973.t1	3915.85	-1.00292	0.140156	-7.15575	8.32e-13	1.63e-11	g28973.t1
g7579.t1	262.513	1.86973	0.261361	7.15384	8.44e-13	1.66e-11	g7579.t1
g31181.t1	405.222	-1.13161	0.158368	-7.14539	8.97e-13	1.76e-11	g31181.t1
g39818.t1	428.318	-1.36303	0.190765	-7.14507	9e-13	1.76e-11	g39818.t1
g27474.t1	531.912	-1.12597	0.157642	-7.14262	9.16e-13	1.79e-11	g27474.t1
g45486.t1	272.522	-1.50521	0.210803	-7.14038	9.31e-13	1.82e-11	g45486.t1
g45083.t1	3510.92	-1.15455	0.161705	-7.13984	9.34e-13	1.83e-11	g45083.t1
g42645.t1	487.981	-2.18682	0.30656	-7.13341	9.79e-13	1.91e-11	g42645.t1
g32006.t1	1384.51	-1.25192	0.175651	-7.12731	1.02e-12	1.99e-11	g32006.t1
g31426.t1	635.646	-1.41894	0.199155	-7.12483	1.04e-12	2.03e-11	g31426.t1
g13794.t1	461.029	-1.43587	0.201709	-7.11851	1.09e-12	2.12e-11	g13794.t1
g3948.t1	210.773	-1.40432	0.197464	-7.11181	1.15e-12	2.23e-11	g3948.t1
g40217.t1	1667.06	-1.58305	0.222626	-7.1108	1.15e-12	2.24e-11	g40217.t1
g8298.t1	181.877	-1.8426	0.259167	-7.10969	1.16e-12	2.26e-11	g8298.t1
g32358.t1	776.272	-1.18991	0.16739	-7.1086	1.17e-12	2.27e-11	g32358.t1
g37304.t1	3131.06	-1.55672	0.219042	-7.10698	1.19e-12	2.3e-11	g37304.t1
g25007.t1	585.408	-1.12519	0.158455	-7.101	1.24e-12	2.4e-11	g25007.t1
g2390.t1	471.522	1.40772	0.198254	7.10057	1.24e-12	2.4e-11	g2390.t1
g19639.t1	1970.32	1.01199	0.142831	7.08523	1.39e-12	2.67e-11	g19639.t1
g32274.t1	551.197	-1.17132	0.165325	-7.08496	1.39e-12	2.68e-11	g32274.t1
g42518.t1	388.896	-1.34163	0.189386	-7.08409	1.4e-12	2.69e-11	g42518.t1
g28738.t1	102.032	2.51273	0.354755	7.08301	1.41e-12	2.71e-11	g28738.t1
g43784.t1	1343.44	1.24235	0.175489	7.07937	1.45e-12	2.78e-11	g43784.t1
g3479.t1	309.08	-1.47156	0.207983	-7.0754	1.49e-12	2.86e-11	g3479.t1
g33223.t1	425.052	-2.02403	0.286173	-7.07273	1.52e-12	2.91e-11	g33223.t1
g22702.t1	362.421	1.03984	0.147055	7.07107	1.54e-12	2.94e-11	g22702.t1
g33489.t1	198.278	-1.43693	0.203245	-7.06996	1.55e-12	2.96e-11	g33489.t1
g32925.t1	1634.69	-1.69244	0.239548	-7.06516	1.6e-12	3.06e-11	g32925.t1
g25132.t1	785.668	-1.4982	0.212081	-7.06431	1.61e-12	3.08e-11	g25132.t1
g45422.t1	13639.5	-1.54797	0.219236	-7.06076	1.66e-12	3.15e-11	g45422.t1
g35958.t1	496.565	-1.33808	0.189528	-7.06005	1.66e-12	3.17e-11	g35958.t1
g9570.t1	511.635	-1.77283	0.251111	-7.05994	1.67e-12	3.17e-11	g9570.t1
g24382.t1	1314.11	1.78383	0.252767	7.05721	1.7e-12	3.23e-11	g24382.t1
g36370.t1	522.676	-1.76858	0.250687	-7.0549	1.73e-12	3.28e-11	g36370.t1
g35907.t1	273.056	-1.91446	0.27141	-7.05375	1.74e-12	3.31e-11	g35907.t1
g18001.t1	2049.66	1.32278	0.187556	7.05271	1.75e-12	3.33e-11	g18001.t1
g42653.t1	280.062	-1.83062	0.259976	-7.0415	1.9e-12	3.6e-11	g42653.t1
g35805.t1	188.271	1.37594	0.195411	7.04127	1.9e-12	3.6e-11	g35805.t1
g340.t1	909.145	-1.40268	0.199255	-7.03962	1.93e-12	3.65e-11	g340.t1
g13455.t1	350.834	-1.22179	0.173578	-7.03884	1.94e-12	3.66e-11	g13455.t1
g36249.t1	119.648	-1.81344	0.257674	-7.0377	1.95e-12	3.69e-11	g36249.t1
g5233.t1	149.892	-1.6247	0.230928	-7.03553	1.99e-12	3.75e-11	g5233.t1
g27863.t1	137.584	1.97622	0.281019	7.03234	2.03e-12	3.83e-11	g27863.t1
g20220.t1	264.453	1.19939	0.170584	7.03111	2.05e-12	3.86e-11	g20220.t1
g22296.t1	208.162	-2.05615	0.292448	-7.03083	2.05e-12	3.86e-11	g22296.t1
g15475.t1	2120.8	-1.19243	0.169648	-7.02881	2.08e-12	3.91e-11	g15475.t1
g19608.t1	395.032	1.36827	0.194711	7.02718	2.11e-12	3.96e-11	g19608.t1
g2266.t1	112.92	-1.64973	0.234891	-7.02337	2.17e-12	4.07e-11	g2266.t1
g41278.t1	763.148	-1.02559	0.146054	-7.02199	2.19e-12	4.1e-11	g41278.t1
g21008.t1	471.446	-1.25187	0.178299	-7.02118	2.2e-12	4.12e-11	g21008.t1
g43624.t1	549.715	-1.27873	0.182184	-7.01889	2.24e-12	4.19e-11	g43624.t1
g33431.t1	817.597	-1.43496	0.204504	-7.0168	2.27e-12	4.25e-11	g33431.t1
g29761.t1	197.275	1.71609	0.244685	7.01343	2.33e-12	4.35e-11	g29761.t1
g24816.t1	850.29	-1.14476	0.163295	-7.01037	2.38e-12	4.44e-11	g24816.t1
g658.t1	239.921	-2.06565	0.294982	-7.00264	2.51e-12	4.69e-11	g658.t1
g26261.t1	317.772	-1.47179	0.210293	-6.99875	2.58e-12	4.81e-11	g26261.t1
g33304.t1	299.241	-1.2576	0.179816	-6.9938	2.68e-12	4.98e-11	g33304.t1
g8602.t1	727.886	-1.74244	0.249167	-6.99306	2.69e-12	5.01e-11	g8602.t1
g36465.t1	2672.78	1.41986	0.203153	6.98909	2.77e-12	5.15e-11	g36465.t1
g9934.t1	665.245	-1.20658	0.172708	-6.98622	2.82e-12	5.25e-11	g9934.t1
g5906.t1	829.301	-1.4243	0.203917	-6.9847	2.85e-12	5.3e-11	g5906.t1
g13048.t1	135.938	-2.75663	0.394664	-6.98474	2.85e-12	5.3e-11	g13048.t1
g14246.t2	56.8197	9.03183	1.29325	6.98382	2.87e-12	5.33e-11	g14246.t2
g8518.t1	765.772	-1.16182	0.166378	-6.98298	2.89e-12	5.36e-11	g8518.t1
g24948.t1	294.916	-2.59088	0.37109	-6.98181	2.91e-12	5.39e-11	g24948.t1
g24541.t1	113.956	-1.85986	0.266503	-6.97874	2.98e-12	5.5e-11	g24541.t1
g17687.t1	455.88	-1.19964	0.171911	-6.97824	2.99e-12	5.52e-11	g17687.t1
g19268.t1	68.3356	-2.70227	0.38734	-6.97648	3.03e-12	5.58e-11	g19268.t1
g34531.t1	4551.06	-1.52014	0.217989	-6.97346	3.09e-12	5.7e-11	g34531.t1
g3009.t1	993.345	-1.28035	0.184053	-6.95642	3.49e-12	6.41e-11	g3009.t1
g17722.t1	1095.6	-1.74689	0.251138	-6.95591	3.5e-12	6.43e-11	g17722.t1
g13917.t1	908.544	-1.27252	0.182986	-6.95422	3.55e-12	6.5e-11	g13917.t1
g10523.t1	242.42	-1.33588	0.192169	-6.95162	3.61e-12	6.62e-11	g10523.t1
g32484.t1	1972.81	1.12986	0.162543	6.95114	3.62e-12	6.64e-11	g32484.t1
g16780.t1	1533.84	-1.28733	0.185222	-6.95019	3.65e-12	6.68e-11	g16780.t1
g41299.t1	2511.74	-1.55507	0.22387	-6.94629	3.75e-12	6.85e-11	g41299.t1
g6904.t1	980.617	-1.38923	0.200174	-6.94012	3.92e-12	7.14e-11	g6904.t1
g45765.t1	45447.6	1.23171	0.17749	6.93963	3.93e-12	7.16e-11	g45765.t1
g6289.t1	192.056	-1.37786	0.198624	-6.93703	4e-12	7.29e-11	g6289.t1
g38072.t1	381.865	-1.22511	0.176654	-6.93511	4.06e-12	7.38e-11	g38072.t1
g41800.t1	324.242	-1.03061	0.148607	-6.93516	4.06e-12	7.38e-11	g41800.t1
g19712.t1	325.291	1.25352	0.180785	6.93379	4.1e-12	7.45e-11	g19712.t1
g23137.t1	227.747	-1.21077	0.174728	-6.92944	4.23e-12	7.67e-11	g23137.t1
g38191.t1	375.64	-1.16612	0.168353	-6.92663	4.31e-12	7.81e-11	g38191.t1
g10245.t1	496.032	-1.18479	0.171073	-6.92563	4.34e-12	7.87e-11	g10245.t1
g16380.t1	208.958	-1.57669	0.227666	-6.92548	4.35e-12	7.87e-11	g16380.t1
g34563.t1	703.178	1.87621	0.270995	6.9234	4.41e-12	7.98e-11	g34563.t1
g31640.t1	346.943	1.78576	0.257953	6.92279	4.43e-12	8.01e-11	g31640.t1
g31923.t1	470.555	-1.16404	0.168178	-6.9215	4.47e-12	8.07e-11	g31923.t1
g35057.t1	627.567	-1.34985	0.195028	-6.92133	4.47e-12	8.07e-11	g35057.t1
g14126.t1	515.443	-1.96714	0.284227	-6.92102	4.48e-12	8.09e-11	g14126.t1
g38656.t1	1212.52	-1.06658	0.15415	-6.91909	4.55e-12	8.19e-11	g38656.t1
g27875.t1	273.191	-1.76999	0.255848	-6.91812	4.58e-12	8.24e-11	g27875.t1
g13759.t1	978.998	-1.50301	0.217271	-6.91768	4.59e-12	8.26e-11	g13759.t1
g41991.t1	524.958	-1.18354	0.171122	-6.91636	4.63e-12	8.33e-11	g41991.t1
g14679.t1	1038.21	-1.71984	0.248675	-6.91603	4.64e-12	8.34e-11	g14679.t1
g21952.t1	200.767	1.34495	0.194528	6.91396	4.71e-12	8.46e-11	g21952.t1
g10831.t1	144.076	-1.60076	0.23179	-6.90607	4.98e-12	8.93e-11	g10831.t1
g6368.t1	4920.8	-1.32181	0.191437	-6.90468	5.03e-12	9.01e-11	g6368.t1
g10693.t1	24846.7	-2.34601	0.339769	-6.90473	5.03e-12	9.01e-11	g10693.t1
g26527.t1	462.348	-1.06658	0.154507	-6.90315	5.09e-12	9.1e-11	g26527.t1
g29950.t1	357.677	1.09198	0.158315	6.89752	5.29e-12	9.45e-11	g29950.t1
g35009.t1	252.342	-1.55644	0.225796	-6.8931	5.46e-12	9.74e-11	g35009.t1
g23032.t1	381.658	-1.69801	0.246351	-6.89264	5.48e-12	9.76e-11	g23032.t1
g19693.t1	854.028	-1.60987	0.23384	-6.88449	5.8e-12	1.03e-10	g19693.t1
g45901.t1	1796.14	-1.30023	0.188874	-6.88411	5.81e-12	1.03e-10	g45901.t1
g13445.t1	337.865	-1.31813	0.191533	-6.88203	5.9e-12	1.05e-10	g13445.t1
g6232.t1	1069.63	-1.52809	0.222118	-6.87962	6e-12	1.07e-10	g6232.t1
g45916.t1	245.425	-1.95549	0.284284	-6.87863	6.04e-12	1.07e-10	g45916.t1
g1307.t1	1081.09	-1.44113	0.209511	-6.87853	6.05e-12	1.07e-10	g1307.t1
g30546.t1	5112.16	-1.64877	0.239731	-6.87758	6.09e-12	1.08e-10	g30546.t1
g12742.t1	2065.75	1.04517	0.151985	6.8768	6.12e-12	1.08e-10	g12742.t1
g42380.t1	428.394	-1.82699	0.26571	-6.87587	6.16e-12	1.09e-10	g42380.t1
g2255.t1	354.807	-1.40975	0.205061	-6.87475	6.21e-12	1.1e-10	g2255.t1
g36547.t1	662.449	1.27481	0.185432	6.87479	6.21e-12	1.1e-10	g36547.t1
g2336.t1	2495.14	-1.78065	0.259066	-6.87334	6.27e-12	1.11e-10	g2336.t1
g4401.t1	772.281	-1.37092	0.199564	-6.86958	6.44e-12	1.14e-10	g4401.t1
g30542.t1	401.251	-1.35173	0.196807	-6.8683	6.5e-12	1.14e-10	g30542.t1
g6075.t1	44.0149	8.66345	1.2615	6.86759	6.53e-12	1.15e-10	g6075.t1
g40433.t1	83.9325	-2.49787	0.364118	-6.86005	6.88e-12	1.21e-10	g40433.t1
g24027.t1	153.392	-1.58422	0.23146	-6.84445	7.68e-12	1.35e-10	g24027.t1
g21732.t1	1085.82	-2.74833	0.401641	-6.84275	7.77e-12	1.36e-10	g21732.t1
g19324.t1	631.271	-1.40097	0.204753	-6.84226	7.8e-12	1.37e-10	g19324.t1
g14520.t1	469.431	-1.16823	0.170748	-6.84184	7.82e-12	1.37e-10	g14520.t1
g24349.t1	1444.43	-1.29787	0.189748	-6.83993	7.92e-12	1.39e-10	g24349.t1
g36437.t1	183.716	-1.74987	0.255857	-6.83926	7.96e-12	1.39e-10	g36437.t1
g35300.t1	8431.66	-1.24112	0.181503	-6.83799	8.03e-12	1.41e-10	g35300.t1
g46169.t1	48.1475	8.79258	1.28608	6.83671	8.1e-12	1.42e-10	g46169.t1
g12477.t1	415.064	1.26357	0.184882	6.83445	8.23e-12	1.44e-10	g12477.t1
g23904.t1	481.353	-1.03327	0.151188	-6.83434	8.24e-12	1.44e-10	g23904.t1
g13719.t1	1667.65	1.41866	0.207647	6.83205	8.37e-12	1.46e-10	g13719.t1
g20926.t2	1233.98	-1.4076	0.206044	-6.83155	8.4e-12	1.46e-10	g20926.t2
g44172.t1	447.356	1.22827	0.179828	6.83023	8.48e-12	1.48e-10	g44172.t1
g26793.t1	2306.2	-1.43743	0.210487	-6.82905	8.55e-12	1.49e-10	g26793.t1
g38847.t1	613.619	-1.78043	0.260716	-6.82902	8.55e-12	1.49e-10	g38847.t1
g16617.t1	183.812	-1.43864	0.210846	-6.8232	8.9e-12	1.55e-10	g16617.t1
g16546.t1	197.978	-1.24842	0.18297	-6.82311	8.91e-12	1.55e-10	g16546.t1
g36034.t1	905.457	-1.30466	0.191248	-6.82181	8.99e-12	1.56e-10	g36034.t1
g35707.t1	731.422	-1.7875	0.262136	-6.81897	9.17e-12	1.59e-10	g35707.t1
g1033.t1	140.923	-2.06297	0.302653	-6.81628	9.34e-12	1.62e-10	g1033.t1
g42626.t2	411.889	-1.34017	0.196633	-6.8156	9.39e-12	1.62e-10	g42626.t2
g917.t1	274.719	-1.34905	0.197956	-6.8149	9.43e-12	1.63e-10	g917.t1
g30540.t1	1289.29	-1.52429	0.223799	-6.81097	9.69e-12	1.67e-10	g30540.t1
g21104.t1	1804.57	-1.12973	0.165905	-6.80951	9.79e-12	1.69e-10	g21104.t1
g20828.t1	298.88	-1.41373	0.20765	-6.80824	9.88e-12	1.7e-10	g20828.t1
g27389.t1	793.969	-2.52885	0.371468	-6.80773	9.91e-12	1.71e-10	g27389.t1
g13056.t1	4377.43	-1.15397	0.16968	-6.80083	1.04e-11	1.79e-10	g13056.t1
g129.t1	8029.57	-1.17635	0.172975	-6.8007	1.04e-11	1.79e-10	g129.t1
g13716.t1	1682.54	1.40252	0.206303	6.79836	1.06e-11	1.82e-10	g13716.t1
g32567.t1	2343.54	1.35515	0.199412	6.79572	1.08e-11	1.85e-10	g32567.t1
g13798.t1	6758.56	-1.23978	0.182446	-6.79529	1.08e-11	1.85e-10	g13798.t1
g8897.t1	190.756	-1.32952	0.195723	-6.79284	1.1e-11	1.89e-10	g8897.t1
g5849.t1	265.616	-1.13978	0.167835	-6.79105	1.11e-11	1.91e-10	g5849.t1
g12799.t1	7146.78	1.29363	0.190491	6.79103	1.11e-11	1.91e-10	g12799.t1
g23202.t1	932.276	-1.02937	0.15163	-6.78869	1.13e-11	1.94e-10	g23202.t1
g10874.t1	446.522	-1.2034	0.177335	-6.78602	1.15e-11	1.97e-10	g10874.t1
g22465.t1	227.491	-1.20957	0.178265	-6.78525	1.16e-11	1.98e-10	g22465.t1
g36104.t1	276.827	-1.2664	0.186809	-6.7791	1.21e-11	2.06e-10	g36104.t1
g8257.t1	116.443	-2.38441	0.351777	-6.77819	1.22e-11	2.08e-10	g8257.t1
g20764.t1	3773.64	-1.06548	0.157239	-6.77617	1.23e-11	2.1e-10	g20764.t1
g18658.t1	358.07	-1.12276	0.165696	-6.77599	1.24e-11	2.1e-10	g18658.t1
g33084.t1	708.308	-2.75664	0.406861	-6.77539	1.24e-11	2.11e-10	g33084.t1
g34047.t1	546.186	-1.00478	0.148353	-6.77289	1.26e-11	2.14e-10	g34047.t1
g14942.t1	238.314	-1.70118	0.251749	-6.75745	1.4e-11	2.37e-10	g14942.t1
g39776.t1	6468.29	-1.60638	0.237746	-6.7567	1.41e-11	2.38e-10	g39776.t1
g21606.t1	301.317	-1.21545	0.179996	-6.75263	1.45e-11	2.45e-10	g21606.t1
g20137.t1	349.775	-1.04762	0.155158	-6.75197	1.46e-11	2.46e-10	g20137.t1
g29776.t1	34.2284	-8.78907	1.30175	-6.75176	1.46e-11	2.46e-10	g29776.t1
g23605.t1	108.854	-2.20373	0.326467	-6.75024	1.48e-11	2.49e-10	g23605.t1
g40374.t1	495.448	1.2665	0.187636	6.74975	1.48e-11	2.49e-10	g40374.t1
g28251.t1	1449.58	-1.49053	0.220844	-6.74924	1.49e-11	2.5e-10	g28251.t1
g22009.t1	526.113	-1.7686	0.262088	-6.74809	1.5e-11	2.52e-10	g22009.t1
g37583.t1	2018.93	-2.54129	0.376715	-6.74592	1.52e-11	2.55e-10	g37583.t1
g20402.t1	372.876	-1.51402	0.224439	-6.7458	1.52e-11	2.55e-10	g20402.t1
g40806.t2	1281.3	2.00905	0.297969	6.74247	1.56e-11	2.61e-10	g40806.t2
g35838.t1	1309.57	-1.24779	0.185157	-6.73906	1.59e-11	2.67e-10	g35838.t1
g9313.t1	360.575	-1.07316	0.159372	-6.73363	1.65e-11	2.77e-10	g9313.t1
g32857.t1	750.515	-1.1336	0.168425	-6.73057	1.69e-11	2.83e-10	g32857.t1
g10240.t1	981.636	1.42681	0.212029	6.72931	1.7e-11	2.85e-10	g10240.t1
g37123.t1	300.964	-1.62573	0.241633	-6.7281	1.72e-11	2.87e-10	g37123.t1
g10821.t1	609.125	-1.05133	0.156272	-6.72758	1.73e-11	2.88e-10	g10821.t1
g35839.t1	580.171	1.05121	0.156277	6.72655	1.74e-11	2.89e-10	g35839.t1
g6540.t1	1939.29	-1.38839	0.206547	-6.72191	1.79e-11	2.98e-10	g6540.t1
g39693.t1	312.234	-1.61202	0.239828	-6.72157	1.8e-11	2.99e-10	g39693.t1
g16095.t1	380.03	-1.43417	0.213379	-6.72121	1.8e-11	2.99e-10	g16095.t1
g34655.t1	436.27	-1.19501	0.177808	-6.72076	1.81e-11	3e-10	g34655.t1
g43191.t1	250.971	-1.36201	0.202682	-6.7199	1.82e-11	3.02e-10	g43191.t1
g18533.t1	172.482	-1.39695	0.207899	-6.7194	1.82e-11	3.03e-10	g18533.t1
g3667.t1	193.151	-2.61449	0.389244	-6.71686	1.86e-11	3.08e-10	g3667.t1
g11408.t1	1796.96	-1.32254	0.196983	-6.71402	1.89e-11	3.14e-10	g11408.t1
g35670.t1	890.787	-1.14467	0.170522	-6.71271	1.91e-11	3.16e-10	g35670.t1
g38472.t1	260.279	-1.58649	0.236421	-6.71044	1.94e-11	3.2e-10	g38472.t1
g12349.t1	9663.07	-1.47725	0.220237	-6.70753	1.98e-11	3.27e-10	g12349.t1
g31698.t1	984.225	-2.20811	0.329275	-6.70597	2e-11	3.3e-10	g31698.t1
g36083.t1	283.319	-1.37161	0.204563	-6.70506	2.01e-11	3.32e-10	g36083.t1
g45274.t1	381.361	1.08339	0.161579	6.70502	2.01e-11	3.32e-10	g45274.t1
g41760.t1	386.576	1.99936	0.29835	6.70139	2.06e-11	3.4e-10	g41760.t1
g45575.t1	60.5181	-2.20534	0.329191	-6.69926	2.09e-11	3.44e-10	g45575.t1
g30586.t1	971.563	-1.00086	0.149419	-6.69833	2.11e-11	3.46e-10	g30586.t1
g42650.t1	610.943	-1.26061	0.188261	-6.69604	2.14e-11	3.51e-10	g42650.t1
g670.t1	792.728	-1.74906	0.261244	-6.69513	2.15e-11	3.53e-10	g670.t1
g8839.t1	377.363	-1.94832	0.291106	-6.69282	2.19e-11	3.59e-10	g8839.t1
g19995.t1	343.354	-1.31607	0.19668	-6.69144	2.21e-11	3.62e-10	g19995.t1
g34284.t2	494.847	-1.60706	0.240219	-6.68999	2.23e-11	3.65e-10	g34284.t2
g26234.t1	256.31	-1.46789	0.219484	-6.68792	2.26e-11	3.7e-10	g26234.t1
g44988.t1	2154.55	-1.62891	0.243617	-6.68638	2.29e-11	3.74e-10	g44988.t1
g26463.t1	434.217	-1.44558	0.216297	-6.68331	2.34e-11	3.82e-10	g26463.t1
g24896.t1	413.539	-1.11567	0.16694	-6.68305	2.34e-11	3.82e-10	g24896.t1
g23205.t1	708.746	-1.30394	0.195205	-6.67983	2.39e-11	3.9e-10	g23205.t1
g14266.t1	220.762	-2.07715	0.310968	-6.67963	2.4e-11	3.91e-10	g14266.t1
g21036.t1	8977.68	-1.47038	0.220198	-6.67754	2.43e-11	3.96e-10	g21036.t1
g13394.t1	213.489	-1.73298	0.259556	-6.67672	2.44e-11	3.98e-10	g13394.t1
g26645.t1	661.129	1.22285	0.18319	6.67531	2.47e-11	4.02e-10	g26645.t1
g30803.t1	1654.54	-1.47804	0.221468	-6.6738	2.49e-11	4.06e-10	g30803.t1
g33663.t1	9416.38	-1.41604	0.212212	-6.67277	2.51e-11	4.08e-10	g33663.t1
g38239.t1	161.61	-2.11174	0.316518	-6.67178	2.53e-11	4.11e-10	g38239.t1
g19153.t1	365.123	1.41395	0.212025	6.66878	2.58e-11	4.19e-10	g19153.t1
g28486.t1	204.687	-1.44	0.215965	-6.66774	2.6e-11	4.22e-10	g28486.t1
g35455.t1	36.9795	8.41195	1.26257	6.66256	2.69e-11	4.37e-10	g35455.t1
g41774.t1	1618.65	-1.8066	0.27127	-6.65978	2.74e-11	4.44e-10	g41774.t1
g39764.t1	1200.22	-1.21075	0.181802	-6.6597	2.74e-11	4.45e-10	g39764.t1
g24060.t1	319.656	-1.75451	0.263464	-6.65941	2.75e-11	4.45e-10	g24060.t1
g31665.t1	421.749	-1.54323	0.231805	-6.65745	2.79e-11	4.51e-10	g31665.t1
g24923.t1	157.292	-1.60244	0.240838	-6.6536	2.86e-11	4.63e-10	g24923.t1
g1092.t1	354.521	-1.912	0.28737	-6.65346	2.86e-11	4.63e-10	g1092.t1
g40565.t1	29.6563	-8.58607	1.29079	-6.65177	2.9e-11	4.68e-10	g40565.t1
g8927.t1	1037.72	-1.46397	0.220379	-6.64294	3.07e-11	4.96e-10	g8927.t1
g42928.t1	337.084	-1.59326	0.239973	-6.63932	3.15e-11	5.08e-10	g42928.t1
g41078.t1	565.098	-1.12113	0.168881	-6.63856	3.17e-11	5.1e-10	g41078.t1
g14090.t1	1229.02	-1.25142	0.188646	-6.6337	3.27e-11	5.26e-10	g14090.t1
g12297.t1	318.83	-1.3613	0.205235	-6.63291	3.29e-11	5.29e-10	g12297.t1
g37152.t1	3164.3	-1.18651	0.178892	-6.63252	3.3e-11	5.3e-10	g37152.t1
g37946.t2	2991.99	1.6548	0.249549	6.63116	3.33e-11	5.34e-10	g37946.t2
g19601.t1	600.661	-1.17351	0.177019	-6.6293	3.37e-11	5.41e-10	g19601.t1
g21222.t1	255.551	-2.35826	0.356123	-6.62202	3.54e-11	5.68e-10	g21222.t1
g41930.t1	258.118	-1.63276	0.246593	-6.62128	3.56e-11	5.7e-10	g41930.t1
g27684.t1	401.237	1.37844	0.20824	6.61949	3.6e-11	5.77e-10	g27684.t1
g16869.t1	685.842	-1.10446	0.166891	-6.61786	3.64e-11	5.83e-10	g16869.t1
g12630.t1	656.559	-2.45535	0.371144	-6.61565	3.7e-11	5.91e-10	g12630.t1
g19766.t1	368.381	-1.72345	0.26086	-6.60678	3.93e-11	6.27e-10	g19766.t1
g41425.t1	400.691	-1.05492	0.15968	-6.6065	3.93e-11	6.28e-10	g41425.t1
g35562.t1	1238.18	-1.41717	0.214537	-6.60574	3.96e-11	6.31e-10	g35562.t1
g30139.t1	347.583	-1.24876	0.189154	-6.6018	4.06e-11	6.47e-10	g30139.t1
g30289.t1	237.836	-1.54229	0.233642	-6.60111	4.08e-11	6.5e-10	g30289.t1
g16237.t1	367.642	-1.06396	0.161264	-6.59761	4.18e-11	6.65e-10	g16237.t1
g18553.t1	3397.14	1.4944	0.226562	6.596	4.22e-11	6.72e-10	g18553.t1
g36369.t1	536.471	-1.60978	0.244093	-6.59495	4.25e-11	6.76e-10	g36369.t1
g11144.t1	851.802	-1.12756	0.170978	-6.59473	4.26e-11	6.77e-10	g11144.t1
g17708.t1	298.625	-2.13021	0.323107	-6.59288	4.31e-11	6.85e-10	g17708.t1
g11759.t1	1038.64	-1.12345	0.170466	-6.59048	4.38e-11	6.96e-10	g11759.t1
g20233.t2	101.399	-2.07341	0.314655	-6.58947	4.41e-11	7e-10	g20233.t2
g30302.t1	526.797	-1.33543	0.202703	-6.58809	4.46e-11	7.06e-10	g30302.t1
g44929.t1	138.882	-1.63632	0.248374	-6.58812	4.45e-11	7.06e-10	g44929.t1
g1391.t1	1021.23	-1.03015	0.156376	-6.58765	4.47e-11	7.06e-10	g1391.t1
g27668.t1	412.965	-1.32389	0.200965	-6.58769	4.47e-11	7.06e-10	g27668.t1
g35033.t1	437.86	-1.89314	0.287371	-6.58779	4.46e-11	7.06e-10	g35033.t1
g24150.t1	260.138	1.20581	0.183133	6.58435	4.57e-11	7.22e-10	g24150.t1
g2995.t1	1405.11	-1.13206	0.171948	-6.58374	4.59e-11	7.24e-10	g2995.t1
g14121.t1	141.372	-2.82377	0.428899	-6.58376	4.59e-11	7.24e-10	g14121.t1
g45900.t1	281.542	-1.22447	0.185999	-6.58321	4.6e-11	7.26e-10	g45900.t1
g37329.t1	206.762	-1.75294	0.266342	-6.58153	4.66e-11	7.34e-10	g37329.t1
g29283.t1	621.604	-1.53928	0.233886	-6.58132	4.66e-11	7.35e-10	g29283.t1
g40806.t3	859.168	1.68671	0.256337	6.58007	4.7e-11	7.4e-10	g40806.t3
g19775.t1	1267.05	1.01451	0.15431	6.57446	4.88e-11	7.67e-10	g19775.t1
g23322.t1	215.541	-1.24706	0.189741	-6.57242	4.95e-11	7.77e-10	g23322.t1
g11058.t1	146.944	-1.41771	0.215901	-6.5665	5.15e-11	8.08e-10	g11058.t1
g24068.t1	130.803	-1.59763	0.243327	-6.56577	5.18e-11	8.11e-10	g24068.t1
g7872.t1	12985.6	-1.41684	0.215815	-6.56507	5.2e-11	8.15e-10	g7872.t1
g28317.t1	172.2	-1.33656	0.203687	-6.56181	5.32e-11	8.32e-10	g28317.t1
g12575.t1	35.9116	8.36991	1.27595	6.55975	5.39e-11	8.43e-10	g12575.t1
g45569.t1	596.629	-1.05535	0.160917	-6.55837	5.44e-11	8.51e-10	g45569.t1
g35747.t1	2646.57	-1.12936	0.172213	-6.55791	5.46e-11	8.53e-10	g35747.t1
g11107.t1	1067.02	-1.51164	0.23062	-6.55466	5.58e-11	8.71e-10	g11107.t1
g16371.t1	146.671	-2.08259	0.317906	-6.55095	5.72e-11	8.92e-10	g16371.t1
g14798.t1	633.983	-1.95808	0.29903	-6.54811	5.83e-11	9.09e-10	g14798.t1
g2677.t1	521.103	1.47201	0.224816	6.54763	5.85e-11	9.12e-10	g2677.t1
g18302.t1	11721.1	-1.37488	0.210007	-6.54682	5.88e-11	9.16e-10	g18302.t1
g22926.t1	419.614	-1.20929	0.184743	-6.54578	5.92e-11	9.22e-10	g22926.t1
g38328.t1	219.564	-1.19986	0.18332	-6.54515	5.94e-11	9.25e-10	g38328.t1
g22462.t1	279.268	-1.36496	0.208624	-6.54266	6.04e-11	9.4e-10	g22462.t1
g25232.t1	202.246	1.37871	0.210788	6.54072	6.12e-11	9.52e-10	g25232.t1
g35195.t1	199.321	1.24718	0.190779	6.53728	6.26e-11	9.71e-10	g35195.t1
g26872.t1	162.785	-1.30996	0.200428	-6.53582	6.33e-11	9.8e-10	g26872.t1
g32293.t1	233.064	-2.3979	0.366914	-6.5353	6.35e-11	9.83e-10	g32293.t1
g14970.t1	233.037	-1.27733	0.195462	-6.53494	6.36e-11	9.85e-10	g14970.t1
g45163.t1	444.451	-2.14317	0.328119	-6.53167	6.5e-11	1.01e-09	g45163.t1
g31948.t1	1005.85	-1.05013	0.160791	-6.531	6.53e-11	1.01e-09	g31948.t1
g35866.t1	244.108	-1.4398	0.220517	-6.5292	6.61e-11	1.02e-09	g35866.t1
g773.t1	1012.47	-1.77178	0.27149	-6.52616	6.75e-11	1.04e-09	g773.t1
g45582.t1	985.543	-1.24551	0.190903	-6.52431	6.83e-11	1.05e-09	g45582.t1
g43121.t1	7944.32	-1.32471	0.203055	-6.52393	6.85e-11	1.05e-09	g43121.t1
g41323.t1	1960.92	-1.37047	0.21015	-6.52138	6.97e-11	1.07e-09	g41323.t1
g10586.t1	289.236	-1.12462	0.172455	-6.52125	6.97e-11	1.07e-09	g10586.t1
g13427.t2	3672.71	-1.42392	0.218383	-6.52031	7.02e-11	1.08e-09	g13427.t2
g4925.t1	526.59	-1.28928	0.197738	-6.52011	7.03e-11	1.08e-09	g4925.t1
g24376.t1	400.478	-1.19919	0.184105	-6.51362	7.34e-11	1.13e-09	g24376.t1
g13714.t1	1802.55	1.34899	0.207118	6.51313	7.36e-11	1.13e-09	g13714.t1
g16738.t1	196.166	-1.49279	0.229248	-6.51167	7.43e-11	1.14e-09	g16738.t1
g20448.t1	1416.24	-1.40757	0.216159	-6.51173	7.43e-11	1.14e-09	g20448.t1
g29475.t1	368.749	-1.05606	0.162196	-6.51104	7.46e-11	1.14e-09	g29475.t1
g1065.t1	33.5782	8.27287	1.27211	6.50329	7.86e-11	1.2e-09	g1065.t1
g21322.t1	242.802	-1.2744	0.195988	-6.50244	7.9e-11	1.21e-09	g21322.t1
g40184.t1	615.588	-1.4072	0.216436	-6.50169	7.94e-11	1.21e-09	g40184.t1
g33590.t1	458.622	-1.51672	0.233403	-6.49826	8.13e-11	1.24e-09	g33590.t1
g31418.t1	1539.55	-1.23181	0.189565	-6.49807	8.14e-11	1.24e-09	g31418.t1
g43120.t1	8045.19	-1.39932	0.215377	-6.49709	8.19e-11	1.25e-09	g43120.t1
g11523.t1	242.161	-1.42513	0.219371	-6.49646	8.22e-11	1.25e-09	g11523.t1
g3560.t1	930.906	-1.3303	0.204789	-6.49595	8.25e-11	1.25e-09	g3560.t1
g41632.t1	390.012	-2.12044	0.326569	-6.49309	8.41e-11	1.28e-09	g41632.t1
g40159.t1	490.969	-1.0387	0.160101	-6.48778	8.71e-11	1.32e-09	g40159.t1
g38403.t3	1724.98	1.21084	0.186693	6.48572	8.83e-11	1.34e-09	g38403.t3
g39086.t1	145.574	-1.43396	0.221095	-6.48573	8.83e-11	1.34e-09	g39086.t1
g16747.t1	135.741	1.6416	0.253442	6.47723	9.34e-11	1.41e-09	g16747.t1
g40357.t1	1654.48	-1.03195	0.159412	-6.47348	9.58e-11	1.45e-09	g40357.t1
g23186.t1	376.421	-1.4758	0.228034	-6.47186	9.68e-11	1.46e-09	g23186.t1
g24502.t1	565.047	-1.05603	0.163238	-6.46925	9.85e-11	1.49e-09	g24502.t1
g4265.t1	244.161	-1.94256	0.300416	-6.46622	1e-10	1.51e-09	g4265.t1
g21725.t2	814.774	-1.12245	0.17367	-6.46311	1.03e-10	1.54e-09	g21725.t2
g45655.t1	144.917	1.65856	0.256861	6.45704	1.07e-10	1.61e-09	g45655.t1
g1793.t1	532.631	-1.03249	0.159934	-6.45568	1.08e-10	1.62e-09	g1793.t1
g4544.t1	406.931	-1.2617	0.195514	-6.45326	1.09e-10	1.65e-09	g4544.t1
g39267.t1	720.548	-1.20334	0.186493	-6.4525	1.1e-10	1.65e-09	g39267.t1
g22309.t1	94.1156	2.3296	0.361116	6.45111	1.11e-10	1.67e-09	g22309.t1
g42949.t1	126.663	1.67471	0.259659	6.44964	1.12e-10	1.68e-09	g42949.t1
g35501.t1	264.778	-1.93536	0.300087	-6.44932	1.12e-10	1.68e-09	g35501.t1
g28071.t1	733.952	-1.44079	0.223499	-6.44652	1.14e-10	1.71e-09	g28071.t1
g32756.t1	1243.59	-1.1378	0.176525	-6.44553	1.15e-10	1.72e-09	g32756.t1
g33887.t1	268.77	-1.32456	0.205521	-6.44488	1.16e-10	1.73e-09	g33887.t1
g29251.t1	173.369	-1.80597	0.280391	-6.44089	1.19e-10	1.77e-09	g29251.t1
g20893.t1	585.264	-1.18187	0.183513	-6.44027	1.19e-10	1.78e-09	g20893.t1
g28526.t1	2007.79	-1.20956	0.187838	-6.43936	1.2e-10	1.79e-09	g28526.t1
g20614.t1	127.319	2.06593	0.321318	6.42953	1.28e-10	1.91e-09	g20614.t1
g19534.t1	246.049	-1.32911	0.206741	-6.42887	1.29e-10	1.92e-09	g19534.t1
g21326.t1	3091.02	-1.25293	0.19493	-6.4276	1.3e-10	1.93e-09	g21326.t1
g44771.t1	439.941	1.07475	0.167274	6.42506	1.32e-10	1.96e-09	g44771.t1
g33261.t1	27.0987	-8.4523	1.31612	-6.42212	1.34e-10	2e-09	g33261.t1
g44534.t1	485.426	-1.54215	0.240197	-6.42034	1.36e-10	2.02e-09	g44534.t1
g10293.t1	1294.22	1.01632	0.158306	6.41995	1.36e-10	2.02e-09	g10293.t1
g4170.t1	107.071	-2.19997	0.342686	-6.41977	1.36e-10	2.02e-09	g4170.t1
g11017.t1	1322.46	-1.22679	0.191123	-6.41885	1.37e-10	2.03e-09	g11017.t1
g2306.t1	227.297	-2.33723	0.364164	-6.41807	1.38e-10	2.04e-09	g2306.t1
g30319.t1	637.519	-1.41675	0.220755	-6.41774	1.38e-10	2.04e-09	g30319.t1
g6823.t1	1055.78	-1.14734	0.178857	-6.41481	1.41e-10	2.08e-09	g6823.t1
g36201.t1	304.581	-1.10418	0.172155	-6.41389	1.42e-10	2.09e-09	g36201.t1
g14674.t1	275.195	-1.36911	0.213488	-6.41303	1.43e-10	2.1e-09	g14674.t1
g39511.t1	279.866	-1.44569	0.225538	-6.40998	1.46e-10	2.15e-09	g39511.t1
g23310.t1	339.675	-1.4472	0.225779	-6.4098	1.46e-10	2.15e-09	g23310.t1
g25199.t1	198.937	-1.56264	0.243948	-6.40562	1.5e-10	2.2e-09	g25199.t1
g27493.t1	205.53	-1.70076	0.265603	-6.40339	1.52e-10	2.23e-09	g27493.t1
g44516.t1	302.729	-1.53333	0.239493	-6.40239	1.53e-10	2.25e-09	g44516.t1
g37384.t1	162.757	-1.65549	0.258698	-6.39931	1.56e-10	2.29e-09	g37384.t1
g26817.t1	439.809	-1.89592	0.296324	-6.39814	1.57e-10	2.31e-09	g26817.t1
g18118.t1	561.999	-1.86988	0.292285	-6.39747	1.58e-10	2.32e-09	g18118.t1
g13261.t2	210.949	-1.48733	0.232532	-6.39623	1.59e-10	2.33e-09	g13261.t2
g390.t1	345.484	-1.28527	0.201046	-6.39293	1.63e-10	2.38e-09	g390.t1
g794.t1	512.213	-1.07777	0.168635	-6.39118	1.65e-10	2.41e-09	g794.t1
g10885.t1	69.7168	-2.71263	0.424517	-6.38992	1.66e-10	2.42e-09	g10885.t1
g40060.t1	1341.49	-1.20739	0.188977	-6.38911	1.67e-10	2.43e-09	g40060.t1
g19551.t1	236.411	-1.17438	0.183845	-6.38787	1.68e-10	2.45e-09	g19551.t1
g7689.t1	608.378	1.05615	0.165371	6.38653	1.7e-10	2.47e-09	g7689.t1
g44954.t1	108.236	2.22426	0.348407	6.38409	1.72e-10	2.51e-09	g44954.t1
g22768.t1	494.616	1.21563	0.1905	6.38125	1.76e-10	2.56e-09	g22768.t1
g39792.t1	1154.02	-1.40255	0.219888	-6.37849	1.79e-10	2.6e-09	g39792.t1
g37546.t1	3537.65	1.01253	0.159025	6.36711	1.93e-10	2.8e-09	g37546.t1
g15620.t1	30.3838	8.12857	1.27686	6.36605	1.94e-10	2.82e-09	g15620.t1
g28434.t1	3560.53	-1.25094	0.196516	-6.36561	1.95e-10	2.82e-09	g28434.t1
g39928.t1	962.049	-1.71878	0.270082	-6.3639	1.97e-10	2.85e-09	g39928.t1
g28.t1	635.234	-1.59427	0.250564	-6.36272	1.98e-10	2.87e-09	g28.t1
g261.t1	247.244	-1.14502	0.179996	-6.36136	2e-10	2.9e-09	g261.t1
g15737.t1	237.749	-1.86607	0.293478	-6.35847	2.04e-10	2.95e-09	g15737.t1
g38454.t1	459.132	-1.61248	0.253793	-6.35351	2.1e-10	3.04e-09	g38454.t1
g7497.t1	323.603	-1.80405	0.28404	-6.35141	2.13e-10	3.08e-09	g7497.t1
g10817.t1	128.064	-1.62409	0.255746	-6.35041	2.15e-10	3.1e-09	g10817.t1
g21817.t6	60.9722	9.13356	1.43828	6.35032	2.15e-10	3.1e-09	g21817.t6
g38718.t1	4239.86	1.07155	0.168818	6.34737	2.19e-10	3.16e-09	g38718.t1
g21146.t1	356.129	-1.29666	0.204304	-6.3467	2.2e-10	3.17e-09	g21146.t1
g36884.t1	617.752	-1.31222	0.206851	-6.34379	2.24e-10	3.23e-09	g36884.t1
g14209.t1	872.481	-1.03199	0.162682	-6.34357	2.24e-10	3.23e-09	g14209.t1
g16066.t1	331.102	-1.35682	0.213893	-6.34344	2.25e-10	3.23e-09	g16066.t1
g6475.t1	7075.88	-1.17004	0.184579	-6.33895	2.31e-10	3.32e-09	g6475.t1
g43490.t1	1377.5	-1.61273	0.254455	-6.33797	2.33e-10	3.34e-09	g43490.t1
g11286.t1	603.859	-2.26956	0.358135	-6.33716	2.34e-10	3.36e-09	g11286.t1
g12102.t1	172.818	-1.60593	0.253417	-6.33712	2.34e-10	3.36e-09	g12102.t1
g33356.t1	363.643	-2.05935	0.325007	-6.33632	2.35e-10	3.38e-09	g33356.t1
g43860.t1	546.138	1.43634	0.226695	6.336	2.36e-10	3.38e-09	g43860.t1
g4927.t1	743.14	-1.45543	0.229757	-6.33465	2.38e-10	3.41e-09	g4927.t1
g15350.t1	422.987	-1.56865	0.247861	-6.32875	2.47e-10	3.54e-09	g15350.t1
g11842.t1	311.775	-1.71209	0.270631	-6.32627	2.51e-10	3.59e-09	g11842.t1
g33736.t1	200.443	-1.83564	0.290162	-6.32626	2.51e-10	3.59e-09	g33736.t1
g8646.t1	648.863	-1.21067	0.191423	-6.32457	2.54e-10	3.63e-09	g8646.t1
g35160.t1	654.946	-1.0818	0.171101	-6.3226	2.57e-10	3.67e-09	g35160.t1
g24102.t1	337.5	1.07787	0.170495	6.32203	2.58e-10	3.68e-09	g24102.t1
g39170.t1	354.484	-1.22249	0.193374	-6.3219	2.58e-10	3.68e-09	g39170.t1
g23323.t1	253.384	-1.33454	0.211106	-6.32168	2.59e-10	3.68e-09	g23323.t1
g41576.t1	623.842	-1.62038	0.25654	-6.31627	2.68e-10	3.81e-09	g41576.t1
g36148.t1	398.583	-1.45049	0.229656	-6.31594	2.69e-10	3.82e-09	g36148.t1
g24512.t1	129.434	-1.93789	0.306837	-6.31571	2.69e-10	3.82e-09	g24512.t1
g34146.t1	504.357	-1.13725	0.180113	-6.31407	2.72e-10	3.86e-09	g34146.t1
g38239.t2	254.89	-1.33679	0.211735	-6.31351	2.73e-10	3.87e-09	g38239.t2
g39020.t1	255.84	-1.93836	0.307059	-6.31267	2.74e-10	3.89e-09	g39020.t1
g35021.t1	3335.4	-1.08202	0.171421	-6.31209	2.75e-10	3.9e-09	g35021.t1
g19030.t1	745.857	1.21762	0.19293	6.31117	2.77e-10	3.93e-09	g19030.t1
g3108.t1	544.584	-1.58277	0.251071	-6.30409	2.9e-10	4.1e-09	g3108.t1
g3537.t1	531.041	-1.36489	0.216541	-6.30316	2.92e-10	4.13e-09	g3537.t1
g19039.t1	266.942	-1.60328	0.254474	-6.30038	2.97e-10	4.2e-09	g19039.t1
g43699.t1	309.007	-1.45394	0.230832	-6.29869	3e-10	4.24e-09	g43699.t1
g26149.t1	890.472	-1.46874	0.233247	-6.29696	3.04e-10	4.29e-09	g26149.t1
g4171.t1	394.608	-1.97695	0.314176	-6.29247	3.12e-10	4.41e-09	g4171.t1
g39200.t1	3414.42	1.04178	0.165574	6.29191	3.14e-10	4.42e-09	g39200.t1
g41293.t1	631.148	-1.38767	0.220551	-6.29184	3.14e-10	4.42e-09	g41293.t1
g10355.t1	314.703	-1.26198	0.200606	-6.29083	3.16e-10	4.45e-09	g10355.t1
g22670.t1	831.657	-1.73609	0.276028	-6.28954	3.18e-10	4.49e-09	g22670.t1
g18573.t1	1718.97	-1.42722	0.22702	-6.28675	3.24e-10	4.57e-09	g18573.t1
g26787.t1	786.579	-1.36793	0.217598	-6.28649	3.25e-10	4.57e-09	g26787.t1
g1812.t5	279.827	1.5175	0.241416	6.28584	3.26e-10	4.59e-09	g1812.t5
g42218.t1	4783.98	1.14532	0.182236	6.28482	3.28e-10	4.62e-09	g42218.t1
g18600.t1	556.582	-1.50779	0.23994	-6.28403	3.3e-10	4.64e-09	g18600.t1
g18654.t1	571.852	-1.3977	0.222443	-6.28342	3.31e-10	4.65e-09	g18654.t1
g22431.t1	457.565	-1.23034	0.1959	-6.28048	3.38e-10	4.73e-09	g22431.t1
g36288.t1	932.076	-1.05455	0.167966	-6.27836	3.42e-10	4.79e-09	g36288.t1
g21042.t1	108.471	1.70406	0.271482	6.27688	3.45e-10	4.84e-09	g21042.t1
g22813.t1	189.15	-1.58943	0.253294	-6.27504	3.5e-10	4.89e-09	g22813.t1
g21237.t1	540.212	1.30397	0.207884	6.27257	3.55e-10	4.96e-09	g21237.t1
g13861.t1	158.562	-1.5233	0.242963	-6.26966	3.62e-10	5.05e-09	g13861.t1
g33224.t1	248.11	-3.00027	0.478603	-6.2688	3.64e-10	5.08e-09	g33224.t1
g19721.t1	165.696	-1.27577	0.203912	-6.25644	3.94e-10	5.48e-09	g19721.t1
g33752.t1	125.154	-1.63788	0.261789	-6.25649	3.94e-10	5.48e-09	g33752.t1
g11828.t1	945.928	-1.11725	0.178622	-6.25483	3.98e-10	5.53e-09	g11828.t1
g28391.t1	127.767	-1.36603	0.218487	-6.25225	4.05e-10	5.62e-09	g28391.t1
g2106.t1	458.455	1.5404	0.24649	6.24934	4.12e-10	5.72e-09	g2106.t1
g11454.t1	207.374	-1.3534	0.216605	-6.24827	4.15e-10	5.75e-09	g11454.t1
g27241.t2	3425.86	1.8185	0.291045	6.24816	4.15e-10	5.75e-09	g27241.t2
g44778.t1	29.1195	8.06727	1.29114	6.24819	4.15e-10	5.75e-09	g44778.t1
g38526.t2	2135.43	1.3728	0.219738	6.24745	4.17e-10	5.77e-09	g38526.t2
g13324.t1	1263.39	-1.6636	0.266322	-6.24659	4.2e-10	5.8e-09	g13324.t1
g26026.t1	195.448	-1.26603	0.20271	-6.24549	4.22e-10	5.84e-09	g26026.t1
g10683.t1	1519.76	-1.87971	0.301016	-6.24456	4.25e-10	5.87e-09	g10683.t1
g16353.t1	755.458	-2.31103	0.370187	-6.24287	4.3e-10	5.93e-09	g16353.t1
g26246.t1	340.227	-1.21292	0.194287	-6.24292	4.29e-10	5.93e-09	g26246.t1
g45752.t1	329.764	1.3944	0.223493	6.2391	4.4e-10	6.06e-09	g45752.t1
g43564.t1	508.079	-2.02452	0.324508	-6.23875	4.41e-10	6.07e-09	g43564.t1
g21967.t1	2119.91	-1.50917	0.241914	-6.23844	4.42e-10	6.08e-09	g21967.t1
g40698.t1	762.465	-2.60751	0.418171	-6.23552	4.5e-10	6.19e-09	g40698.t1
g59.t1	584.285	-1.40669	0.225655	-6.23382	4.55e-10	6.26e-09	g59.t1
g29585.t1	1178.77	-1.15224	0.184918	-6.23107	4.63e-10	6.37e-09	g29585.t1
g34562.t1	32.1267	8.20923	1.31752	6.23083	4.64e-10	6.37e-09	g34562.t1
g39911.t1	93.6348	-1.92964	0.309743	-6.22981	4.67e-10	6.41e-09	g39911.t1
g15527.t1	28.8308	8.05292	1.2928	6.22905	4.69e-10	6.44e-09	g15527.t1
g8458.t1	618.128	-1.01215	0.162524	-6.2277	4.73e-10	6.49e-09	g8458.t1
g12777.t1	371.737	1.08629	0.17451	6.2248	4.82e-10	6.61e-09	g12777.t1
g10241.t1	1168.62	1.1267	0.18106	6.2228	4.88e-10	6.69e-09	g10241.t1
g9436.t1	755.491	-1.70586	0.274176	-6.22176	4.92e-10	6.72e-09	g9436.t1
g3864.t2	763.053	-1.48705	0.239022	-6.2214	4.93e-10	6.74e-09	g3864.t2
g43239.t1	5218.07	-1.03058	0.165674	-6.22051	4.96e-10	6.77e-09	g43239.t1
g16601.t1	690.582	-1.08846	0.175056	-6.21778	5.04e-10	6.88e-09	g16601.t1
g37861.t1	471.693	-1.55853	0.250666	-6.21755	5.05e-10	6.89e-09	g37861.t1
g39581.t1	5817.99	-1.42059	0.228518	-6.21655	5.08e-10	6.93e-09	g39581.t1
g42580.t1	56.603	-2.15832	0.347251	-6.21545	5.12e-10	6.97e-09	g42580.t1
g44303.t1	70.6777	2.03294	0.327189	6.21336	5.19e-10	7.06e-09	g44303.t1
g11919.t1	363.74	-1.46902	0.236443	-6.213	5.2e-10	7.08e-09	g11919.t1
g5761.t1	1518.74	-1.23403	0.198639	-6.21241	5.22e-10	7.1e-09	g5761.t1
g7911.t1	264.581	-1.98482	0.319575	-6.21082	5.27e-10	7.17e-09	g7911.t1
g29832.t1	143.519	-1.59431	0.256717	-6.21039	5.29e-10	7.18e-09	g29832.t1
g41260.t1	177.655	-1.22354	0.197107	-6.20749	5.38e-10	7.31e-09	g41260.t1
g6880.t1	210.58	-1.61261	0.259859	-6.20569	5.45e-10	7.4e-09	g6880.t1
g15682.t2	652.005	-1.19496	0.192595	-6.2045	5.49e-10	7.45e-09	g15682.t2
g21855.t1	209.729	-1.11221	0.179279	-6.20378	5.51e-10	7.48e-09	g21855.t1
g10179.t1	286.463	-1.38158	0.222737	-6.20272	5.55e-10	7.52e-09	g10179.t1
g39088.t1	362.748	-1.56092	0.251857	-6.19764	5.73e-10	7.75e-09	g39088.t1
g21591.t1	232.033	-1.2828	0.207086	-6.19453	5.85e-10	7.9e-09	g21591.t1
g42257.t1	725.123	-1.17081	0.189157	-6.18959	6.03e-10	8.14e-09	g42257.t1
g32639.t1	871.813	-1.77929	0.287645	-6.18573	6.18e-10	8.34e-09	g32639.t1
g43428.t1	408.465	-1.56665	0.253284	-6.18535	6.2e-10	8.36e-09	g43428.t1
g28652.t1	677.401	-1.50286	0.242984	-6.18499	6.21e-10	8.37e-09	g28652.t1
g9983.t1	352.658	-1.42354	0.230166	-6.18483	6.22e-10	8.38e-09	g9983.t1
g11915.t1	375.18	1.16236	0.188009	6.18247	6.31e-10	8.5e-09	g11915.t1
g5319.t1	109.328	-2.61565	0.423269	-6.17963	6.43e-10	8.64e-09	g5319.t1
g14004.t1	79.8034	-1.70212	0.275539	-6.17743	6.52e-10	8.76e-09	g14004.t1
g21203.t1	207.365	-1.53877	0.249261	-6.17331	6.69e-10	8.97e-09	g21203.t1
g34298.t1	228.194	-1.32335	0.214432	-6.17141	6.77e-10	9.08e-09	g34298.t1
g27035.t1	216.954	-1.19616	0.193947	-6.16749	6.94e-10	9.29e-09	g27035.t1
g6159.t1	891.228	-1.30863	0.212217	-6.16648	6.98e-10	9.35e-09	g6159.t1
g5063.t1	272.394	-1.91018	0.309867	-6.16452	7.07e-10	9.46e-09	g5063.t1
g7775.t1	958.108	-1.48717	0.24134	-6.16214	7.18e-10	9.6e-09	g7775.t1
g7143.t1	129.082	-1.49663	0.242949	-6.16029	7.26e-10	9.7e-09	g7143.t1
g6849.t1	487.643	-1.35416	0.219958	-6.15644	7.44e-10	9.93e-09	g6849.t1
g15427.t1	190.457	-1.40085	0.227671	-6.15297	7.6e-10	1.01e-08	g15427.t1
g17689.t1	118.968	-1.44938	0.235558	-6.15297	7.6e-10	1.01e-08	g17689.t1
g11926.t1	751.462	-1.49804	0.243616	-6.14918	7.79e-10	1.04e-08	g11926.t1
g29065.t1	559.051	-1.32126	0.214909	-6.14799	7.85e-10	1.04e-08	g29065.t1
g33519.t1	330.948	-1.16154	0.189014	-6.14525	7.98e-10	1.06e-08	g33519.t1
g26063.t1	454.349	1.42187	0.231428	6.14391	8.05e-10	1.07e-08	g26063.t1
g26814.t1	388.172	1.00247	0.163245	6.14091	8.2e-10	1.09e-08	g26814.t1
g43701.t2	457.592	-1.60938	0.262082	-6.14076	8.21e-10	1.09e-08	g43701.t2
g18138.t1	205.127	-1.28649	0.209511	-6.14046	8.23e-10	1.09e-08	g18138.t1
g44728.t1	288.173	-2.01312	0.327896	-6.13951	8.28e-10	1.1e-08	g44728.t1
g43227.t1	330.433	-1.43061	0.233057	-6.13847	8.33e-10	1.1e-08	g43227.t1
g10720.t1	385.498	1.54731	0.252105	6.13755	8.38e-10	1.11e-08	g10720.t1
g654.t1	593.421	-2.00033	0.326023	-6.13556	8.49e-10	1.12e-08	g654.t1
g43959.t1	1127.38	-1.16971	0.190646	-6.13549	8.49e-10	1.12e-08	g43959.t1
g44853.t1	630.427	-1.93538	0.315596	-6.13245	8.65e-10	1.14e-08	g44853.t1
g45269.t1	171.23	-1.43251	0.233724	-6.12909	8.84e-10	1.17e-08	g45269.t1
g43165.t1	117.064	-1.55824	0.254312	-6.12728	8.94e-10	1.18e-08	g43165.t1
g42180.t1	1975.96	1.27172	0.207751	6.12136	9.28e-10	1.22e-08	g42180.t1
g351.t1	1602.02	-1.49209	0.243777	-6.12074	9.31e-10	1.22e-08	g351.t1
g30633.t1	593.374	-1.49946	0.245	-6.12025	9.34e-10	1.23e-08	g30633.t1
g19741.t1	928.504	-1.30868	0.213833	-6.12012	9.35e-10	1.23e-08	g19741.t1
g41486.t1	598.003	-1.21619	0.19873	-6.1198	9.37e-10	1.23e-08	g41486.t1
g6490.t1	1024.65	-1.8612	0.304163	-6.1191	9.41e-10	1.23e-08	g6490.t1
g38258.t1	569.861	-1.10349	0.18037	-6.11792	9.48e-10	1.24e-08	g38258.t1
g6146.t1	565.355	-1.10796	0.181134	-6.11679	9.55e-10	1.25e-08	g6146.t1
g30736.t1	202.778	-1.52476	0.249489	-6.11153	9.87e-10	1.29e-08	g30736.t1
g23370.t1	353.118	-1.35983	0.222592	-6.10906	1e-09	1.31e-08	g23370.t1
g30192.t1	380.355	-1.33971	0.219474	-6.10418	1.03e-09	1.35e-08	g30192.t1
g12446.t1	430.523	-1.24275	0.203644	-6.10255	1.04e-09	1.36e-08	g12446.t1
g4123.t1	441.238	-1.62198	0.2658	-6.10227	1.05e-09	1.37e-08	g4123.t1
g30470.t1	1133.28	-1.06133	0.174103	-6.096	1.09e-09	1.42e-08	g30470.t1
g31042.t1	5160.61	1.39701	0.229394	6.09003	1.13e-09	1.47e-08	g31042.t1
g28937.t1	2743.79	-1.46944	0.241299	-6.08973	1.13e-09	1.47e-08	g28937.t1
g31146.t1	1320.1	1.25843	0.20683	6.08435	1.17e-09	1.52e-08	g31146.t1
g16333.t1	253.4	-1.67403	0.275306	-6.08062	1.2e-09	1.56e-08	g16333.t1
g17145.t1	26.2745	7.91912	1.30269	6.07907	1.21e-09	1.57e-08	g17145.t1
g23355.t1	4209.79	-1.53324	0.252231	-6.07872	1.21e-09	1.57e-08	g23355.t1
g39415.t1	211.589	1.73598	0.285677	6.07671	1.23e-09	1.59e-08	g39415.t1
g41549.t1	170.575	-2.25888	0.371738	-6.07653	1.23e-09	1.59e-08	g41549.t1
g42235.t1	219.567	-1.73988	0.286396	-6.07509	1.24e-09	1.6e-08	g42235.t1
g20121.t1	893.593	-1.96709	0.323866	-6.07379	1.25e-09	1.62e-08	g20121.t1
g25460.t1	37.9533	-8.94034	1.4726	-6.07114	1.27e-09	1.64e-08	g25460.t1
g41414.t1	196.32	-1.44577	0.238212	-6.06927	1.28e-09	1.66e-08	g41414.t1
g30717.t1	516.685	-1.624	0.267589	-6.06899	1.29e-09	1.66e-08	g30717.t1
g11310.t1	27.419	7.98053	1.31503	6.06872	1.29e-09	1.66e-08	g11310.t1
g14244.t1	286.803	-1.09792	0.180952	-6.06746	1.3e-09	1.68e-08	g14244.t1
g16545.t1	828.108	-2.29669	0.378535	-6.06732	1.3e-09	1.68e-08	g16545.t1
g36383.t1	197.596	-1.59013	0.262219	-6.06412	1.33e-09	1.71e-08	g36383.t1
g30922.t1	865.286	-1.61339	0.266144	-6.0621	1.34e-09	1.73e-08	g30922.t1
g3056.t1	197.833	-1.27584	0.210485	-6.06143	1.35e-09	1.74e-08	g3056.t1
g2797.t1	445.393	-1.58371	0.261318	-6.06046	1.36e-09	1.75e-08	g2797.t1
g6376.t1	1109.58	-1.13658	0.187574	-6.05936	1.37e-09	1.76e-08	g6376.t1
g31498.t1	157.655	1.74161	0.287435	6.05914	1.37e-09	1.76e-08	g31498.t1
g10979.t1	328.061	-1.74471	0.288037	-6.05724	1.38e-09	1.78e-08	g10979.t1
g54.t1	6942.66	-1.36447	0.225271	-6.05702	1.39e-09	1.78e-08	g54.t1
g29720.t1	395.13	-1.36819	0.225995	-6.05408	1.41e-09	1.81e-08	g29720.t1
g34698.t1	3138.66	-1.31862	0.217877	-6.05212	1.43e-09	1.83e-08	g34698.t1
g21601.t1	1489.44	-1.17029	0.193394	-6.05132	1.44e-09	1.84e-08	g21601.t1
g43939.t1	140.494	-1.89261	0.312792	-6.0507	1.44e-09	1.85e-08	g43939.t1
g11562.t1	219.68	-1.65701	0.27386	-6.05058	1.44e-09	1.85e-08	g11562.t1
g20214.t2	671.036	1.03833	0.171643	6.04932	1.45e-09	1.86e-08	g20214.t2
g30571.t1	57.4028	-2.54665	0.421208	-6.04606	1.48e-09	1.9e-08	g30571.t1
g22127.t1	400.006	-1.29315	0.213985	-6.04317	1.51e-09	1.93e-08	g22127.t1
g4345.t1	4634.36	1.10797	0.183375	6.04208	1.52e-09	1.94e-08	g4345.t1
g33844.t1	83.7978	-1.83608	0.304101	-6.03774	1.56e-09	1.99e-08	g33844.t1
g11218.t1	700.514	-1.82789	0.302786	-6.03691	1.57e-09	2e-08	g11218.t1
g4110.t1	313.861	-1.22842	0.203799	-6.02762	1.66e-09	2.11e-08	g4110.t1
g13792.t1	378.042	-1.0132	0.168116	-6.02678	1.67e-09	2.12e-08	g13792.t1
g1861.t1	894.062	-1.37196	0.227864	-6.02097	1.73e-09	2.2e-08	g1861.t1
g28065.t1	1518.3	-1.7865	0.297158	-6.01194	1.83e-09	2.32e-08	g28065.t1
g4286.t1	3233.89	-1.00137	0.166637	-6.00928	1.86e-09	2.35e-08	g4286.t1
g13036.t1	111.988	-1.82819	0.304323	-6.00741	1.89e-09	2.38e-08	g13036.t1
g16859.t1	570.92	-1.15728	0.192677	-6.00633	1.9e-09	2.39e-08	g16859.t1
g20678.t1	789.908	-1.13896	0.189671	-6.00494	1.91e-09	2.41e-08	g20678.t1
g13399.t1	657.756	1.24868	0.207978	6.0039	1.93e-09	2.43e-08	g13399.t1
g25739.t1	285.833	-1.86691	0.310949	-6.00391	1.93e-09	2.43e-08	g25739.t1
g12172.t1	277.248	-1.90841	0.318102	-5.99938	1.98e-09	2.49e-08	g12172.t1
g16175.t1	557.031	-1.40398	0.234025	-5.99927	1.98e-09	2.49e-08	g16175.t1
g5826.t1	25.876	7.89698	1.31643	5.99877	1.99e-09	2.5e-08	g5826.t1
g20937.t1	472.292	-1.9341	0.322459	-5.99797	2e-09	2.51e-08	g20937.t1
g11956.t1	186.171	-1.70921	0.285229	-5.99242	2.07e-09	2.59e-08	g11956.t1
g30337.t1	286.683	-1.06972	0.178513	-5.99241	2.07e-09	2.59e-08	g30337.t1
g26781.t1	406.33	-1.41589	0.236325	-5.99128	2.08e-09	2.61e-08	g26781.t1
g23141.t1	99.356	1.75954	0.293737	5.99019	2.1e-09	2.63e-08	g23141.t1
g584.t1	940.22	-1.254	0.20935	-5.98996	2.1e-09	2.63e-08	g584.t1
g4769.t1	511.154	-1.43246	0.23916	-5.98953	2.1e-09	2.63e-08	g4769.t1
g30493.t1	1885.05	-1.18689	0.198178	-5.98901	2.11e-09	2.64e-08	g30493.t1
g24069.t1	291.575	-1.43857	0.240315	-5.98619	2.15e-09	2.69e-08	g24069.t1
g29633.t1	408.656	-1.2246	0.204744	-5.98114	2.22e-09	2.77e-08	g29633.t1
g7633.t1	546.731	-1.55644	0.260268	-5.98014	2.23e-09	2.79e-08	g7633.t1
g19394.t1	316.811	-1.43517	0.240035	-5.97902	2.24e-09	2.8e-08	g19394.t1
g27452.t1	546.117	-1.6669	0.27895	-5.97563	2.29e-09	2.86e-08	g27452.t1
g35350.t1	24.9422	7.84379	1.31311	5.97346	2.32e-09	2.9e-08	g35350.t1
g30581.t1	2676.76	1.12757	0.188811	5.97194	2.34e-09	2.92e-08	g30581.t1
g31587.t1	835.084	-1.38214	0.231609	-5.96755	2.41e-09	3e-08	g31587.t1
g28731.t1	145.414	1.50678	0.252502	5.96741	2.41e-09	3e-08	g28731.t1
g41065.t1	799.209	-1.19271	0.199892	-5.96679	2.42e-09	3.01e-08	g41065.t1
g39317.t1	24.4637	7.81607	1.31065	5.9635	2.47e-09	3.07e-08	g39317.t1
g8593.t1	527.814	-1.22139	0.204936	-5.95983	2.52e-09	3.14e-08	g8593.t1
g39976.t1	526.948	-1.21715	0.204228	-5.95977	2.53e-09	3.14e-08	g39976.t1
g32682.t1	1023.77	-1.02582	0.172186	-5.95761	2.56e-09	3.18e-08	g32682.t1
g22327.t1	516.06	-1.93779	0.325345	-5.95611	2.58e-09	3.21e-08	g22327.t1
g14083.t2	690.061	-1.47413	0.247553	-5.9548	2.6e-09	3.23e-08	g14083.t2
g13183.t1	908.399	-1.46785	0.246515	-5.95438	2.61e-09	3.24e-08	g13183.t1
g5554.t1	209.189	-1.15367	0.193803	-5.95281	2.64e-09	3.27e-08	g5554.t1
g17406.t1	356.112	-1.83328	0.307986	-5.95249	2.64e-09	3.27e-08	g17406.t1
g12001.t1	449.672	-1.84208	0.30957	-5.95045	2.67e-09	3.31e-08	g12001.t1
g44011.t1	812.349	-1.088	0.182906	-5.9484	2.71e-09	3.35e-08	g44011.t1
g21586.t1	514.006	-1.38236	0.232442	-5.94712	2.73e-09	3.37e-08	g21586.t1
g14306.t1	285.323	-1.72236	0.289814	-5.94301	2.8e-09	3.46e-08	g14306.t1
g6935.t1	365.297	-1.02398	0.172377	-5.94035	2.84e-09	3.51e-08	g6935.t1
g41421.t1	111.74	-1.68497	0.283704	-5.9392	2.86e-09	3.54e-08	g41421.t1
g14053.t1	325.071	1.40446	0.236628	5.93529	2.93e-09	3.62e-08	g14053.t1
g7333.t1	304.848	1.11872	0.188501	5.93481	2.94e-09	3.62e-08	g7333.t1
g12916.t1	1886.23	-1.13082	0.190588	-5.93334	2.97e-09	3.65e-08	g12916.t1
g16651.t1	268.545	-1.4264	0.240405	-5.93334	2.97e-09	3.65e-08	g16651.t1
g34727.t1	28.5933	8.04089	1.3553	5.93293	2.98e-09	3.66e-08	g34727.t1
g23716.t1	908.234	-1.21273	0.204563	-5.92838	3.06e-09	3.76e-08	g23716.t1
g30564.t1	532.765	-1.62109	0.27345	-5.9283	3.06e-09	3.76e-08	g30564.t1
g38633.t1	294.77	-1.55811	0.262846	-5.92786	3.07e-09	3.77e-08	g38633.t1
g10921.t1	25.6903	7.88674	1.3306	5.92719	3.08e-09	3.78e-08	g10921.t1
g1285.t1	649.104	-1.30397	0.220016	-5.92673	3.09e-09	3.79e-08	g1285.t1
g29611.t1	258.06	-1.73896	0.293655	-5.92179	3.18e-09	3.9e-08	g29611.t1
g30283.t1	379.317	-1.6241	0.274261	-5.92174	3.19e-09	3.9e-08	g30283.t1
g27570.t1	229.44	-1.17362	0.198239	-5.92023	3.21e-09	3.94e-08	g27570.t1
g22680.t1	1226.37	1.15827	0.195653	5.92	3.22e-09	3.94e-08	g22680.t1
g34381.t1	315.233	-1.93953	0.327631	-5.91985	3.22e-09	3.94e-08	g34381.t1
g9911.t1	445.357	-1.54837	0.261643	-5.91786	3.26e-09	3.99e-08	g9911.t1
g4084.t1	235.845	-1.34149	0.226694	-5.91763	3.27e-09	3.99e-08	g4084.t1
g9861.t1	1032.09	-1.19527	0.202118	-5.91369	3.35e-09	4.08e-08	g9861.t1
g22743.t1	504.97	-1.988	0.336187	-5.91338	3.35e-09	4.09e-08	g22743.t1
g28857.t1	23.0833	7.73221	1.30767	5.91298	3.36e-09	4.09e-08	g28857.t1
g11951.t2	684.139	-1.10403	0.186919	-5.90645	3.5e-09	4.25e-08	g11951.t2
g31525.t1	1389.41	-1.48592	0.251578	-5.90638	3.5e-09	4.25e-08	g31525.t1
g30603.t1	269.359	1.00101	0.169501	5.9056	3.51e-09	4.27e-08	g30603.t1
g21351.t1	358.974	-1.08143	0.183209	-5.90269	3.58e-09	4.34e-08	g21351.t1
g40143.t1	244.241	-1.30213	0.220607	-5.90251	3.58e-09	4.35e-08	g40143.t1
g23010.t1	317.899	-1.0645	0.180374	-5.90162	3.6e-09	4.37e-08	g23010.t1
g6436.t1	204.398	1.44901	0.245534	5.90145	3.6e-09	4.37e-08	g6436.t1
g155.t1	348.991	-1.24992	0.211831	-5.90056	3.62e-09	4.39e-08	g155.t1
g7324.t1	1437.1	-1.58665	0.26896	-5.8992	3.65e-09	4.42e-08	g7324.t1
g8680.t1	232.128	-1.34232	0.227543	-5.89921	3.65e-09	4.42e-08	g8680.t1
g21434.t1	1167.76	-1.04162	0.176649	-5.89658	3.71e-09	4.49e-08	g21434.t1
g31522.t1	1127.07	-1.05441	0.17891	-5.89351	3.78e-09	4.57e-08	g31522.t1
g32578.t2	6306.32	-1.09586	0.18614	-5.88729	3.93e-09	4.74e-08	g32578.t2
g951.t1	394.495	-1.30063	0.221126	-5.88187	4.06e-09	4.89e-08	g951.t1
g30024.t1	225.679	-1.43085	0.24343	-5.8779	4.16e-09	5.01e-08	g30024.t1
g17295.t1	295.734	-1.33245	0.226845	-5.87384	4.26e-09	5.13e-08	g17295.t1
g24044.t1	219.7	-1.31035	0.223085	-5.87375	4.26e-09	5.13e-08	g24044.t1
g32257.t1	896.38	-1.04087	0.177288	-5.87107	4.33e-09	5.21e-08	g32257.t1
g1824.t1	154.396	-2.42994	0.413948	-5.87016	4.35e-09	5.23e-08	g1824.t1
g21646.t2	24.8407	7.83779	1.33552	5.86871	4.39e-09	5.28e-08	g21646.t2
g871.t1	92.4323	-2.81974	0.480598	-5.86716	4.43e-09	5.32e-08	g871.t1
g5065.t1	108.488	1.45367	0.247886	5.86427	4.51e-09	5.42e-08	g5065.t1
g32730.t1	732.071	-1.21645	0.207438	-5.86415	4.51e-09	5.42e-08	g32730.t1
g35652.t1	27.285	7.97343	1.35981	5.86364	4.53e-09	5.43e-08	g35652.t1
g29463.t1	134.845	-1.32332	0.225707	-5.86299	4.55e-09	5.45e-08	g29463.t1
g20842.t1	24.2952	7.80619	1.33392	5.85205	4.86e-09	5.81e-08	g20842.t1
g25831.t1	1611.11	-1.0321	0.176367	-5.85198	4.86e-09	5.81e-08	g25831.t1
g36612.t1	24.4567	-8.3062	1.42041	-5.84776	4.98e-09	5.96e-08	g36612.t1
g20625.t1	280.347	-1.49786	0.25635	-5.84303	5.13e-09	6.12e-08	g20625.t1
g18000.t1	1669.34	1.63691	0.280185	5.84225	5.15e-09	6.15e-08	g18000.t1
g44702.t1	3296.76	-1.43402	0.245618	-5.83841	5.27e-09	6.29e-08	g44702.t1
g26419.t1	847.166	-1.12764	0.193437	-5.8295	5.56e-09	6.62e-08	g26419.t1
g26752.t1	312.051	-1.32077	0.226587	-5.82899	5.58e-09	6.64e-08	g26752.t1
g27086.t1	103.25	1.74165	0.298912	5.82664	5.66e-09	6.73e-08	g27086.t1
g28550.t1	222.524	1.68664	0.289508	5.8259	5.68e-09	6.76e-08	g28550.t1
g15699.t1	171.313	-1.54837	0.2661	-5.81873	5.93e-09	7.05e-08	g15699.t1
g14235.t1	222.229	-1.59642	0.274436	-5.81711	5.99e-09	7.11e-08	g14235.t1
g30680.t1	335.144	1.12045	0.192692	5.81473	6.07e-09	7.2e-08	g30680.t1
g14636.t1	190.704	-1.18258	0.203485	-5.81163	6.19e-09	7.33e-08	g14636.t1
g35300.t2	2447.28	-1.45235	0.249909	-5.8115	6.19e-09	7.33e-08	g35300.t2
g15994.t1	324.045	1.40683	0.242204	5.80846	6.3e-09	7.45e-08	g15994.t1
g45729.t2	266.73	-1.32366	0.22791	-5.80783	6.33e-09	7.48e-08	g45729.t2
g722.t1	508.719	-1.37131	0.23613	-5.80745	6.34e-09	7.49e-08	g722.t1
g43629.t1	368.045	-1.86967	0.321964	-5.80707	6.36e-09	7.51e-08	g43629.t1
g26930.t1	365.337	-1.85395	0.319372	-5.80499	6.44e-09	7.6e-08	g26930.t1
g17073.t1	247.283	-1.25627	0.216445	-5.8041	6.47e-09	7.64e-08	g17073.t1
g545.t1	1295.92	-1.11855	0.192729	-5.80373	6.49e-09	7.65e-08	g545.t1
g29.t1	297.723	-1.21047	0.208617	-5.80239	6.54e-09	7.7e-08	g29.t1
g24838.t1	380.377	-1.06151	0.182947	-5.80227	6.54e-09	7.7e-08	g24838.t1
g26144.t1	15172.8	-1.5076	0.260086	-5.79652	6.77e-09	7.96e-08	g26144.t1
g36476.t1	122.848	-1.86186	0.321317	-5.79447	6.85e-09	8.05e-08	g36476.t1
g42999.t1	22.2208	7.67737	1.32544	5.7923	6.94e-09	8.15e-08	g42999.t1
g45468.t1	342.292	-1.05965	0.182953	-5.79192	6.96e-09	8.17e-08	g45468.t1
g2297.t1	3540.73	1.0431	0.180192	5.78886	7.09e-09	8.31e-08	g2297.t1
g33283.t1	5338.29	-1.31148	0.22657	-5.78841	7.11e-09	8.33e-08	g33283.t1
g29316.t1	97.8207	-1.58193	0.273369	-5.78678	7.18e-09	8.4e-08	g29316.t1
g24646.t1	142.755	1.28808	0.222615	5.78612	7.2e-09	8.43e-08	g24646.t1
g34105.t2	558.549	-1.19443	0.206438	-5.78592	7.21e-09	8.43e-08	g34105.t2
g14102.t1	288.212	-1.11271	0.192404	-5.78317	7.33e-09	8.56e-08	g14102.t1
g14601.t1	576.778	-1.22014	0.211003	-5.78259	7.36e-09	8.59e-08	g14601.t1
g18671.t1	2286.63	-1.16436	0.201418	-5.78082	7.43e-09	8.67e-08	g18671.t1
g8543.t1	566.315	-1.66996	0.289209	-5.77423	7.73e-09	9.01e-08	g8543.t1
g2679.t1	407.579	-1.38582	0.240117	-5.77144	7.86e-09	9.15e-08	g2679.t1
g27206.t1	255.967	-1.8371	0.318358	-5.77055	7.9e-09	9.19e-08	g27206.t1
g13430.t2	61.6283	-2.90213	0.502929	-5.77045	7.91e-09	9.19e-08	g13430.t2
g15677.t1	22.075	7.66789	1.32935	5.76816	8.01e-09	9.31e-08	g15677.t1
g44903.t1	187.677	-1.49675	0.259513	-5.76752	8.04e-09	9.34e-08	g44903.t1
g1884.t1	161.234	-1.56863	0.272005	-5.7669	8.07e-09	9.37e-08	g1884.t1
g30746.t1	246.582	-1.22584	0.212769	-5.76137	8.34e-09	9.68e-08	g30746.t1
g8102.t1	1973.28	1.04324	0.181125	5.75975	8.42e-09	9.76e-08	g8102.t1
g4115.t1	153.231	-1.71709	0.298239	-5.75743	8.54e-09	9.89e-08	g4115.t1
g8786.t1	161.459	-1.42958	0.24831	-5.75722	8.55e-09	9.9e-08	g8786.t1
g24397.t1	957.779	1.07497	0.18676	5.75589	8.62e-09	9.98e-08	g24397.t1
g12920.t1	108.463	-1.57047	0.27289	-5.75494	8.67e-09	1e-07	g12920.t1
g708.t1	1115.02	-1.13281	0.196908	-5.75297	8.77e-09	1.01e-07	g708.t1
g42073.t1	294.011	-1.08599	0.188891	-5.74931	8.96e-09	1.04e-07	g42073.t1
g16833.t1	3503.49	-1.31004	0.228107	-5.74311	9.3e-09	1.07e-07	g16833.t1
g33009.t1	228.963	-1.74156	0.303293	-5.74215	9.35e-09	1.08e-07	g33009.t1
g44705.t1	708.619	-1.37586	0.239621	-5.7418	9.37e-09	1.08e-07	g44705.t1
g2642.t1	348.638	-1.00319	0.174818	-5.73847	9.55e-09	1.1e-07	g2642.t1
g1133.t1	253.809	-1.92212	0.335181	-5.73456	9.78e-09	1.12e-07	g1133.t1
g27171.t1	152.846	-1.15841	0.202007	-5.73449	9.78e-09	1.12e-07	g27171.t1
g12959.t1	342.986	1.06377	0.185573	5.73235	9.9e-09	1.14e-07	g12959.t1
g1812.t2	191.537	2.21352	0.386375	5.72895	1.01e-08	1.16e-07	g1812.t2
g12076.t1	1299.4	-1.42967	0.249725	-5.72498	1.03e-08	1.19e-07	g12076.t1
g17017.t1	485.244	-1.76358	0.308112	-5.72384	1.04e-08	1.19e-07	g17017.t1
g13192.t1	100.686	-1.64734	0.287832	-5.72326	1.04e-08	1.2e-07	g13192.t1
g12663.t1	308.088	-1.41091	0.246544	-5.72274	1.05e-08	1.2e-07	g12663.t1
g34596.t1	21.1366	7.60504	1.32908	5.72204	1.05e-08	1.21e-07	g34596.t1
g707.t1	126.3	-1.4402	0.251897	-5.71742	1.08e-08	1.24e-07	g707.t1
g39690.t1	3948.96	1.0487	0.183519	5.71442	1.1e-08	1.26e-07	g39690.t1
g12238.t1	1320.66	-1.45275	0.254304	-5.71265	1.11e-08	1.27e-07	g12238.t1
g15770.t1	17.6913	-7.84176	1.37467	-5.70448	1.17e-08	1.33e-07	g15770.t1
g30662.t1	495.262	-1.27744	0.223947	-5.70422	1.17e-08	1.33e-07	g30662.t1
g36872.t1	54.1608	2.07789	0.364272	5.70424	1.17e-08	1.33e-07	g36872.t1
g14744.t1	1224.76	-1.11105	0.19478	-5.70416	1.17e-08	1.33e-07	g14744.t1
g15891.t1	141.67	-1.6002	0.280562	-5.70353	1.17e-08	1.33e-07	g15891.t1
g45275.t1	165.155	-1.28215	0.224858	-5.70202	1.18e-08	1.35e-07	g45275.t1
[truncated: 1,940 more rows]

## Sheet: MT_vs._JS
Table S3. DESeq2 differentially expression results for Nicotiana benthamiana transcriptomes
	baseMean	log2FoldChange	lfcSE	stat	pvalue	padj	gene
g5460.t1	6159.25	1.43262	0.0416305	34.4127	1.63e-259	4.95e-255	g5460.t1
g45402.t1	13238.4	1.16855	0.0350798	33.3113	2.65e-243	4.03e-239	g45402.t1
g7165.t1	4245.91	-1.57741	0.0482935	-32.6629	5.25e-234	5.32e-230	g7165.t1
g7156.t1	4050.05	-1.57846	0.0488786	-32.2935	8.64e-229	6.56e-225	g7156.t1
g29505.t1	5853.01	-1.51116	0.0568847	-26.5653	1.71e-155	7.41e-152	g29505.t1
g31434.t1	1849.55	-2.26904	0.0867871	-26.1449	1.13e-150	4.28e-147	g31434.t1
g31433.t1	1796.53	-2.2499	0.0870611	-25.8427	2.94e-147	9.91e-144	g31433.t1
g20351.t1	9949.85	-1.21515	0.0471161	-25.7905	1.13e-146	3.45e-143	g20351.t1
g36183.t1	4321.81	1.39097	0.0546258	25.4635	5e-143	1.38e-139	g36183.t1
g20023.t1	1514.83	1.94242	0.076528	25.3818	4.01e-142	1.02e-138	g20023.t1
g2895.t1	1126.29	2.32336	0.100283	23.1681	9.55e-119	2.07e-115	g2895.t1
g29728.t1	2515.41	1.69323	0.0761077	22.2478	1.19e-109	2.25e-106	g29728.t1
g42748.t1	5404.15	1.01474	0.0456278	22.2396	1.42e-109	2.54e-106	g42748.t1
g6876.t1	28697.5	1.09328	0.0493498	22.1538	9.6e-109	1.62e-105	g6876.t1
g31435.t1	1280.7	-2.25378	0.103232	-21.8322	1.15e-105	1.75e-102	g31435.t1
g29050.t1	6089.49	-1.07399	0.0506102	-21.2208	6.14e-100	8.48e-97	g29050.t1
g7157.t1	1424.17	-1.73779	0.0831706	-20.8942	6.04e-97	7.65e-94	g7157.t1
g34254.t1	2822.95	1.20369	0.0576656	20.8736	9.31e-97	1.13e-93	g34254.t1
g3221.t1	1038.47	2.12554	0.114321	18.5927	3.68e-77	2.94e-74	g3221.t1
g1748.t1	5629.74	1.13212	0.0623415	18.1599	1.07e-73	7.76e-71	g1748.t1
g34031.t1	2183.37	1.12171	0.0640312	17.5181	1.04e-68	6.89e-66	g34031.t1
g21718.t1	2185.68	-1.15086	0.0663422	-17.3473	2.07e-67	1.28e-64	g21718.t1
g37967.t1	2627.09	1.09737	0.0634451	17.2964	5.01e-67	3.04e-64	g37967.t1
g17947.t1	494.404	-2.5531	0.148127	-17.2359	1.43e-66	8.35e-64	g17947.t1
g263.t1	1414.68	1.46557	0.085636	17.1139	1.17e-65	6.57e-63	g263.t1
g28929.t1	1772.66	1.22143	0.0724274	16.8642	8.26e-64	4.4e-61	g28929.t1
g21319.t1	1645.08	1.29408	0.0818338	15.8135	2.51e-56	1.16e-53	g21319.t1
g12556.t1	1548.84	-1.19052	0.0760821	-15.6479	3.43e-55	1.56e-52	g12556.t1
g36830.t1	945.586	-1.77403	0.116043	-15.2877	9.24e-53	3.85e-50	g36830.t1
g17948.t1	479.785	-2.23819	0.14882	-15.0396	4.04e-51	1.64e-48	g17948.t1
g8806.t1	1105.1	-1.32448	0.0889911	-14.8833	4.23e-50	1.67e-47	g8806.t1
g320.t1	322.532	-2.71311	0.186313	-14.5621	4.89e-48	1.84e-45	g320.t1
g29950.t1	1006.93	-1.28337	0.0963686	-13.3173	1.84e-40	4.99e-38	g29950.t1
g1666.t1	1849.45	1.02827	0.0779535	13.1908	9.91e-40	2.6e-37	g1666.t1
g235.t2	260.66	-2.8606	0.217229	-13.1686	1.33e-39	3.46e-37	g235.t2
g41023.t1	943.504	-1.54091	0.117437	-13.1211	2.49e-39	6.42e-37	g41023.t1
g20054.t1	916.54	1.35638	0.103666	13.0842	4.06e-39	1.04e-36	g20054.t1
g28748.t1	1332.89	-1.07356	0.0859786	-12.4864	8.86e-36	1.99e-33	g28748.t1
g45882.t1	826.33	1.2875	0.103812	12.4023	2.54e-35	5.51e-33	g45882.t1
g30265.t1	769.482	-1.29451	0.105604	-12.2582	1.52e-34	3.18e-32	g30265.t1
g40807.t1	2374.48	1.10596	0.090661	12.1988	3.15e-34	6.52e-32	g40807.t1
g7171.t1	1186.96	-1.09496	0.0900744	-12.1561	5.32e-34	1.08e-31	g7171.t1
g22038.t1	413.165	1.78028	0.148307	12.004	3.39e-33	6.52e-31	g22038.t1
g27422.t1	833.459	1.63971	0.139632	11.743	7.67e-32	1.35e-29	g27422.t1
g2831.t1	627.86	-1.36073	0.117631	-11.5678	6e-31	9.97e-29	g2831.t1
g10445.t1	266.758	-2.26913	0.201655	-11.2526	2.25e-29	3.45e-27	g10445.t1
g23695.t1	1143.77	1.02297	0.0915799	11.1703	5.7e-29	8.49e-27	g23695.t1
g9164.t1	890.938	1.27206	0.115837	10.9814	4.69e-28	6.58e-26	g9164.t1
g11398.t1	170.932	-2.96556	0.272557	-10.8805	1.43e-27	1.95e-25	g11398.t1
g15740.t1	772.915	1.24844	0.115373	10.8209	2.74e-27	3.64e-25	g15740.t1
g15235.t1	841.33	1.2487	0.118269	10.5581	4.66e-26	5.85e-24	g15235.t1
g37970.t1	1094.89	1.04613	0.10048	10.4113	2.2e-25	2.65e-23	g37970.t1
g31632.t1	802.795	-1.15979	0.111982	-10.3569	3.89e-25	4.55e-23	g31632.t1
g33189.t1	519.29	-1.25319	0.124435	-10.071	7.42e-24	8.03e-22	g33189.t1
g24002.t1	988.674	-1.02091	0.101572	-10.0511	9.09e-24	9.66e-22	g24002.t1
g23578.t1	799.53	-1.11233	0.110926	-10.0277	1.15e-23	1.22e-21	g23578.t1
g402.t1	522.632	1.42848	0.14356	9.9504	2.51e-23	2.58e-21	g402.t1
g10712.t1	775.423	1.12412	0.114323	9.83285	8.13e-23	8.1e-21	g10712.t1
g28285.t1	291.952	1.66752	0.173664	9.60203	7.84e-22	7.35e-20	g28285.t1
g25210.t1	796.514	-1.06495	0.112478	-9.46808	2.85e-21	2.59e-19	g25210.t1
g24111.t1	363.417	-1.74122	0.18418	-9.45391	3.26e-21	2.93e-19	g24111.t1
g6896.t1	620.309	1.27456	0.136423	9.34273	9.39e-21	8.25e-19	g6896.t1
g1711.t1	591.762	1.28452	0.13799	9.30879	1.29e-20	1.11e-18	g1711.t1
g10938.t1	159.154	-2.30139	0.247448	-9.3005	1.4e-20	1.2e-18	g10938.t1
g40891.t1	428.087	1.59773	0.177406	9.00606	2.14e-19	1.69e-17	g40891.t1
g4691.t1	424.627	1.43636	0.159536	9.00331	2.19e-19	1.72e-17	g4691.t1
g1933.t1	271.114	-11.5085	1.2982	-8.86497	7.65e-19	5.74e-17	g1933.t1
g6023.t1	406.428	1.30476	0.15029	8.68158	3.9e-18	2.73e-16	g6023.t1
g3647.t1	875.615	1.10872	0.132754	8.35169	6.73e-17	4.35e-15	g3647.t1
g18345.t1	593.478	1.12199	0.134969	8.31294	9.34e-17	6e-15	g18345.t1
g26004.t1	288.865	1.37799	0.166073	8.2975	1.06e-16	6.76e-15	g26004.t1
g29217.t1	319.357	1.5081	0.185777	8.11782	4.75e-16	2.8e-14	g29217.t1
g12870.t2	80.905	9.80473	1.22299	8.01703	1.08e-15	6.19e-14	g12870.t2
g4961.t1	548.524	1.05936	0.13269	7.98372	1.42e-15	8.02e-14	g4961.t1
g27304.t2	779.493	-1.03903	0.130553	-7.95867	1.74e-15	9.77e-14	g27304.t2
g42797.t1	732.098	1.02013	0.129892	7.85363	4.04e-15	2.21e-13	g42797.t1
g7198.t1	297.726	-1.24074	0.161402	-7.68727	1.5e-14	7.84e-13	g7198.t1
g20874.t1	204.853	-1.5817	0.207614	-7.61845	2.57e-14	1.32e-12	g20874.t1
g29653.t1	582.091	1.04467	0.137782	7.58202	3.4e-14	1.73e-12	g29653.t1
g41258.t1	410.606	-1.10659	0.146072	-7.57565	3.57e-14	1.81e-12	g41258.t1
g9617.t1	484.135	1.03446	0.13712	7.54419	4.55e-14	2.27e-12	g9617.t1
g45715.t1	52.6311	9.18456	1.24043	7.40433	1.32e-13	6.29e-12	g45715.t1
g5372.t2	246.542	1.56129	0.210982	7.40013	1.36e-13	6.48e-12	g5372.t2
g34292.t1	263.163	1.5966	0.217904	7.32708	2.35e-13	1.1e-11	g34292.t1
g39662.t1	245.669	-1.38947	0.191595	-7.25211	4.1e-13	1.89e-11	g39662.t1
g7742.t2	49.3485	9.09179	1.27554	7.12783	1.02e-12	4.54e-11	g7742.t2
g16368.t1	400.79	-1.17971	0.16699	-7.06453	1.61e-12	7.06e-11	g16368.t1
g23389.t1	353.225	1.11981	0.159087	7.03899	1.94e-12	8.46e-11	g23389.t1
g43350.t1	628.839	1.13905	0.165175	6.89602	5.35e-12	2.28e-10	g43350.t1
g43779.t2	50.4861	-9.08322	1.31949	-6.88387	5.82e-12	2.47e-10	g43779.t2
g23633.t1	333.058	-1.16192	0.169726	-6.84586	7.6e-12	3.19e-10	g23633.t1
g937.t1	484.338	-1.03308	0.15147	-6.82033	9.08e-12	3.78e-10	g937.t1
g35861.t1	388.144	-1.11273	0.163185	-6.81881	9.18e-12	3.81e-10	g35861.t1
g34351.t1	266.767	1.24731	0.183725	6.78901	1.13e-11	4.63e-10	g34351.t1
g2888.t1	240.748	-1.35681	0.200117	-6.78008	1.2e-11	4.89e-10	g2888.t1
g2312.t1	416.677	-1.08136	0.15954	-6.77797	1.22e-11	4.96e-10	g2312.t1
g24900.t1	358.448	1.0083	0.14904	6.76532	1.33e-11	5.36e-10	g24900.t1
g8677.t1	256.936	-1.20519	0.1798	-6.70298	2.04e-11	8.1e-10	g8677.t1
g39000.t2	33.14	-8.47614	1.27484	-6.64877	2.96e-11	1.15e-09	g39000.t2
g24512.t1	32.2884	8.47942	1.28666	6.59025	4.39e-11	1.68e-09	g24512.t1
g19712.t2	367.741	-1.05887	0.163502	-6.4762	9.41e-11	3.49e-09	g19712.t2
g18907.t1	226.306	1.23343	0.190756	6.46603	1.01e-10	3.72e-09	g18907.t1
g41125.t1	171.091	1.63301	0.252562	6.46576	1.01e-10	3.73e-09	g41125.t1
g889.t1	316.075	-1.15199	0.178512	-6.45326	1.09e-10	4.03e-09	g889.t1
g45885.t1	209.366	1.48115	0.233526	6.34254	2.26e-10	8.08e-09	g45885.t1
g1824.t1	29.1345	8.33154	1.32135	6.30535	2.88e-10	1.01e-08	g1824.t1
g17382.t1	334.953	-1.03211	0.164526	-6.27324	3.54e-10	1.24e-08	g17382.t1
g20152.t1	187.763	1.36721	0.219836	6.21923	5e-10	1.72e-08	g20152.t1
g42777.t2	282.647	-1.18204	0.19193	-6.15873	7.33e-10	2.47e-08	g42777.t2
g41468.t1	116.507	-1.77973	0.289652	-6.14436	8.03e-10	2.68e-08	g41468.t1
g44309.t1	89.5847	-2.05608	0.336278	-6.11423	9.7e-10	3.21e-08	g44309.t1
g41635.t1	123.342	-1.80937	0.29762	-6.07945	1.21e-09	3.94e-08	g41635.t1
g33882.t1	82.2684	-2.02658	0.333434	-6.07791	1.22e-09	3.97e-08	g33882.t1
g36872.t1	183.443	-1.30847	0.217548	-6.01462	1.8e-09	5.77e-08	g36872.t1
g31.t1	159.36	-1.67431	0.278454	-6.01289	1.82e-09	5.82e-08	g31.t1
g26766.t1	266.55	-1.23428	0.208001	-5.93403	2.96e-09	9.17e-08	g26766.t1
g29966.t1	276.438	1.01208	0.171057	5.91659	3.29e-09	1.01e-07	g29966.t1
g32032.t1	314.669	-1.09647	0.185592	-5.90796	3.46e-09	1.06e-07	g32032.t1
g6524.t1	20.5653	7.82894	1.33147	5.87992	4.1e-09	1.25e-07	g6524.t1
g2427.t1	127.988	-1.54293	0.263969	-5.84513	5.06e-09	1.51e-07	g2427.t1
g2252.t1	292.072	1.05836	0.181628	5.82706	5.64e-09	1.68e-07	g2252.t1
g35075.t2	155.684	-2.0317	0.349765	-5.80874	6.29e-09	1.86e-07	g35075.t2
g42731.t2	338.73	-1.0862	0.187064	-5.80655	6.38e-09	1.88e-07	g42731.t2
g15994.t1	424.769	1.00547	0.173194	5.80544	6.42e-09	1.89e-07	g15994.t1
g13483.t1	19.0666	7.71966	1.34255	5.75001	8.92e-09	2.57e-07	g13483.t1
g24722.t1	174.067	-1.28056	0.222956	-5.74354	9.27e-09	2.67e-07	g24722.t1
g26054.t1	19.2036	-7.6889	1.34441	-5.71916	1.07e-08	3.05e-07	g26054.t1
g9812.t1	18.8703	7.70491	1.34747	5.71806	1.08e-08	3.07e-07	g9812.t1
g25004.t2	364.034	-1.21463	0.212777	-5.70846	1.14e-08	3.24e-07	g25004.t2
g1270.t1	18.6756	-7.64889	1.3466	-5.68014	1.35e-08	3.77e-07	g1270.t1
g12553.t1	231.931	-1.13285	0.200797	-5.64177	1.68e-08	4.68e-07	g12553.t1
g26828.t1	18.0725	7.64229	1.35521	5.6392	1.71e-08	4.74e-07	g26828.t1
g17145.t1	122.562	-1.52138	0.270428	-5.62584	1.85e-08	5.09e-07	g17145.t1
g23985.t1	235.686	-1.23685	0.220198	-5.617	1.94e-08	5.33e-07	g23985.t1
g38420.t1	205.248	1.21281	0.216552	5.60055	2.14e-08	5.81e-07	g38420.t1
g27670.t1	17.6834	-7.57019	1.35918	-5.56968	2.55e-08	6.87e-07	g27670.t1
g33293.t1	192.138	-1.45372	0.261201	-5.56551	2.61e-08	7.01e-07	g33293.t1
g44974.t1	339.062	1.03558	0.186574	5.5505	2.85e-08	7.59e-07	g44974.t1
g28300.t1	170.57	1.30477	0.238177	5.47814	4.3e-08	1.11e-06	g28300.t1
g33792.t1	174.357	-1.16446	0.212612	-5.47692	4.33e-08	1.12e-06	g33792.t1
g15151.t1	144.789	-1.35512	0.24926	-5.43658	5.43e-08	1.39e-06	g15151.t1
g41320.t1	202.69	1.3096	0.240975	5.43457	5.49e-08	1.4e-06	g41320.t1
g27573.t1	240.166	1.11737	0.206647	5.40716	6.4e-08	1.62e-06	g27573.t1
g23862.t1	15.8392	7.45228	1.38074	5.39732	6.76e-08	1.7e-06	g23862.t1
g35712.t1	152.961	-1.42463	0.264034	-5.39561	6.83e-08	1.71e-06	g35712.t1
g15183.t1	81.5624	-1.74869	0.324634	-5.38666	7.18e-08	1.8e-06	g15183.t1
g33212.t1	72.8023	-1.84708	0.344731	-5.35805	8.41e-08	2.09e-06	g33212.t1
g45413.t1	221.803	1.06535	0.198894	5.35638	8.49e-08	2.11e-06	g45413.t1
g17276.t1	38.5319	-3.63903	0.681048	-5.34328	9.13e-08	2.25e-06	g17276.t1
g11311.t1	183.36	-1.11819	0.211004	-5.29936	1.16e-07	2.81e-06	g11311.t1
g41191.t1	14.6675	7.34134	1.38827	5.28814	1.24e-07	2.96e-06	g41191.t1
g7564.t1	139.657	1.28429	0.242945	5.28634	1.25e-07	2.99e-06	g7564.t1
g11405.t1	14.7485	-7.30828	1.3892	-5.26077	1.43e-07	3.41e-06	g11405.t1
g8282.t2	14.8697	7.36083	1.40465	5.24032	1.6e-07	3.76e-06	g8282.t2
g37918.t1	201.06	-1.07404	0.2055	-5.22647	1.73e-07	4.04e-06	g37918.t1
g24013.t1	258.197	-1.03431	0.198206	-5.21835	1.81e-07	4.2e-06	g24013.t1
g11171.t1	237.026	-1.10799	0.212559	-5.2126	1.86e-07	4.31e-06	g11171.t1
g35804.t1	190.121	1.21449	0.233847	5.1935	2.06e-07	4.74e-06	g35804.t1
g9530.t1	203.615	1.08612	0.209153	5.19295	2.07e-07	4.75e-06	g9530.t1
g35309.t1	187.291	1.11745	0.215256	5.19126	2.09e-07	4.78e-06	g35309.t1
g7045.t1	13.8161	7.25514	1.40436	5.16614	2.39e-07	5.42e-06	g7045.t1
g44985.t1	127.758	1.36683	0.265428	5.14951	2.61e-07	5.88e-06	g44985.t1
g28943.t1	13.6	-7.19132	1.40358	-5.12355	3e-07	6.69e-06	g28943.t1
g44586.t1	259.572	-1.00827	0.196836	-5.12238	3.02e-07	6.72e-06	g44586.t1
g4855.t3	78.2175	9.7562	1.90572	5.11943	3.06e-07	6.82e-06	g4855.t3
g17930.t1	13.7201	-7.20436	1.41177	-5.10306	3.34e-07	7.39e-06	g17930.t1
g33357.t1	13.1614	7.18492	1.41552	5.07582	3.86e-07	8.42e-06	g33357.t1
g22535.t1	13.3095	-7.15985	1.41379	-5.0643	4.1e-07	8.9e-06	g22535.t1
g4084.t1	249.528	-1.07401	0.212399	-5.05655	4.27e-07	9.24e-06	g4084.t1
g46003.t1	142.537	1.1592	0.230546	5.02805	4.95e-07	1.06e-05	g46003.t1
g29498.t1	158.208	1.16741	0.233411	5.00152	5.69e-07	1.2e-05	g29498.t1
g23994.t1	118.044	-1.34339	0.269847	-4.97833	6.41e-07	1.35e-05	g23994.t1
g43945.t1	157.789	1.12385	0.22607	4.97125	6.65e-07	1.39e-05	g43945.t1
g22767.t1	205.316	1.01553	0.204847	4.95748	7.14e-07	1.48e-05	g22767.t1
g19778.t1	167.989	1.21027	0.244653	4.94689	7.54e-07	1.56e-05	g19778.t1
g37335.t1	12.4831	7.10862	1.44147	4.9315	8.16e-07	1.68e-05	g37335.t1
g29981.t1	197.617	1.04541	0.212249	4.92537	8.42e-07	1.73e-05	g29981.t1
g17759.t1	12.2967	7.08707	1.455	4.87085	1.11e-06	2.22e-05	g17759.t1
g45623.t1	11.8316	-6.99003	1.44053	-4.85239	1.22e-06	2.42e-05	g45623.t1
g12046.t1	391.5	1.22691	0.254029	4.82982	1.37e-06	2.68e-05	g12046.t1
g41297.t1	24.811	4.35483	0.908145	4.79531	1.62e-06	3.15e-05	g41297.t1
g42754.t1	165.346	-1.03206	0.215734	-4.78395	1.72e-06	3.32e-05	g42754.t1
g4068.t1	135.07	1.14067	0.239259	4.76751	1.87e-06	3.57e-05	g4068.t1
g44962.t1	11.3186	6.96717	1.46318	4.76165	1.92e-06	3.66e-05	g44962.t1
g29199.t1	128.64	1.42669	0.300404	4.74922	2.04e-06	3.85e-05	g29199.t1
g43387.t1	10.9918	6.92479	1.465	4.72682	2.28e-06	4.26e-05	g43387.t1
g16200.t1	209.999	-1.11721	0.237181	-4.71035	2.47e-06	4.6e-05	g16200.t1
g13430.t2	58.1655	-2.49182	0.534733	-4.65993	3.16e-06	5.74e-05	g13430.t2
g13852.t1	123.461	-1.3162	0.283199	-4.64761	3.36e-06	6.07e-05	g13852.t1
g37120.t1	140.356	1.1977	0.259022	4.62394	3.77e-06	6.73e-05	g37120.t1
g25181.t1	155.189	1.10855	0.24079	4.60381	4.15e-06	7.37e-05	g25181.t1
g39723.t1	10.8272	-6.86224	1.49207	-4.59913	4.24e-06	7.52e-05	g39723.t1
g11557.t1	175.208	-1.06258	0.231568	-4.58861	4.46e-06	7.88e-05	g11557.t1
g36407.t1	10.3577	-6.79804	1.48285	-4.58444	4.55e-06	8.02e-05	g36407.t1
g28897.t1	113.858	1.28057	0.280125	4.57143	4.84e-06	8.48e-05	g28897.t1
g33530.t1	9.78611	6.75742	1.4879	4.54158	5.58e-06	9.63e-05	g33530.t1
g39128.t1	190.758	1.00141	0.220505	4.54143	5.59e-06	9.63e-05	g39128.t1
g32906.t1	55.887	1.97335	0.434573	4.5409	5.6e-06	9.65e-05	g32906.t1
g37610.t1	9.82952	-6.72293	1.48254	-4.53473	5.77e-06	9.9e-05	g37610.t1
g16214.t1	138.365	1.40017	0.309498	4.524	6.07e-06	0.000103611	g16214.t1
g15751.t1	163.603	1.2198	0.271294	4.49624	6.92e-06	0.000116982	g15751.t1
g15982.t1	18.658	4.43946	0.988266	4.49217	7.05e-06	0.000118977	g15982.t1
g27065.t1	155.24	-1.17452	0.261881	-4.48493	7.29e-06	0.000122545	g27065.t1
g17207.t1	123.496	-1.16165	0.260095	-4.46626	7.96e-06	0.000132633	g17207.t1
g17570.t1	135.733	1.18875	0.266945	4.45316	8.46e-06	0.000140298	g17570.t1
g31970.t1	105.832	1.27077	0.28713	4.42576	9.61e-06	0.000157632	g31970.t1
g633.t1	9.41024	6.70139	1.51722	4.41687	1e-05	0.000163369	g633.t1
g37116.t1	156.337	1.03788	0.235016	4.41619	1e-05	0.000163793	g37116.t1
g11028.t1	127.617	1.25528	0.285394	4.39841	1.09e-05	0.00017629	g11028.t1
g20951.t1	9.13881	6.65835	1.52358	4.37021	1.24e-05	0.000198871	g20951.t1
g6020.t1	123.054	-1.07434	0.248266	-4.32738	1.51e-05	0.000236274	g6020.t1
g30795.t1	55.2291	-1.67785	0.388623	-4.31743	1.58e-05	0.00024642	g30795.t1
g45753.t2	190.915	1.4557	0.337631	4.31151	1.62e-05	0.000252592	g45753.t2
g18298.t1	8.71572	-6.54899	1.52687	-4.28915	1.79e-05	0.000276148	g18298.t1
g40984.t1	37.945	-2.04207	0.476117	-4.28902	1.79e-05	0.000276174	g40984.t1
g36702.t1	8.43525	6.54313	1.53164	4.27198	1.94e-05	0.000296047	g36702.t1
g34653.t1	61.488	-1.6558	0.387867	-4.269	1.96e-05	0.000299583	g34653.t1
g9542.t1	8.45094	6.54559	1.53627	4.26071	2.04e-05	0.000309361	g9542.t1
g28594.t1	8.64969	-6.53888	1.53632	-4.2562	2.08e-05	0.000315198	g28594.t1
g40929.t3	79.9098	-1.46513	0.347089	-4.22119	2.43e-05	0.000362954	g40929.t3
g42066.t1	203.306	1.05038	0.249123	4.21632	2.48e-05	0.000369422	g42066.t1
g25951.t1	8.21271	-6.46336	1.54021	-4.19642	2.71e-05	0.000399629	g25951.t1
g11956.t1	160.098	-1.03586	0.248691	-4.16526	3.11e-05	0.000452044	g11956.t1
g31416.t1	7.92076	6.45247	1.55704	4.14406	3.41e-05	0.000491498	g31416.t1
g11608.t1	154.744	-1.06971	0.259284	-4.12563	3.7e-05	0.000528062	g11608.t1
g42012.t1	8.39262	6.53635	1.59295	4.1033	4.07e-05	0.000574962	g42012.t1
g12386.t1	152.583	1.11109	0.271198	4.09697	4.19e-05	0.0005887	g12386.t1
g24554.t1	132.886	-1.16284	0.28451	-4.08717	4.37e-05	0.000609913	g24554.t1
g35832.t1	7.72092	-6.37426	1.561	-4.08344	4.44e-05	0.000618659	g35832.t1
g43771.t1	41.0862	-2.72479	0.670744	-4.06235	4.86e-05	0.000672072	g43771.t1
g11054.t1	68.1678	1.44225	0.355293	4.05933	4.92e-05	0.000679884	g11054.t1
g45870.t1	7.72894	6.41744	1.58454	4.05003	5.12e-05	0.000705229	g45870.t1
g13995.t1	15.8606	4.18692	1.04237	4.01673	5.9e-05	0.000799979	g13995.t1
g41378.t1	74.7784	1.29628	0.323731	4.00417	6.22e-05	0.000839921	g41378.t1
g15980.t1	7.44521	6.36267	1.5894	4.00318	6.25e-05	0.000843083	g15980.t1
g4986.t1	110.038	-1.25452	0.313825	-3.99753	6.4e-05	0.000860408	g4986.t1
g11725.t1	78.6844	1.29709	0.326051	3.97818	6.94e-05	0.000926535	g11725.t1
g42753.t1	141.188	-1.02555	0.258667	-3.96474	7.35e-05	0.000975178	g42753.t1
g40427.t1	122.738	-1.34243	0.338783	-3.96252	7.42e-05	0.000983438	g40427.t1
g28776.t1	115.25	-1.27979	0.323152	-3.96033	7.48e-05	0.000990762	g28776.t1
g37728.t1	60.7319	-1.48345	0.375296	-3.95275	7.73e-05	0.0010196	g37728.t1
g37983.t1	83.2204	-1.67646	0.424894	-3.94559	7.96e-05	0.00104598	g37983.t1
g38249.t1	117.009	1.23717	0.313807	3.94245	8.07e-05	0.00105752	g38249.t1
g13691.t1	78.3772	-1.33657	0.340379	-3.92672	8.61e-05	0.00111657	g13691.t1
g43093.t1	110.725	1.12693	0.287248	3.92319	8.74e-05	0.00113112	g43093.t1
g31373.t1	109.63	1.11114	0.284005	3.91241	9.14e-05	0.00117683	g31373.t1
g8049.t1	81.4424	-1.3402	0.345383	-3.88034	0.00010431	0.0013265	g8049.t1
g41343.t1	210.002	1.0082	0.260835	3.86528	0.000110962	0.00140262	g41343.t1
g10572.t1	74.6644	1.30937	0.341062	3.8391	0.000123485	0.00154384	g10572.t1
g38353.t1	121.036	-1.04437	0.272395	-3.83404	0.000126054	0.00157079	g38353.t1
g24880.t1	37.507	1.76736	0.461834	3.82683	0.000129803	0.00161354	g24880.t1
g31372.t1	117.471	1.02783	0.269844	3.80896	0.000139551	0.00171924	g31372.t1
g43753.t1	48.7433	-1.65077	0.435159	-3.7935	0.000148542	0.00182041	g43753.t1
g15942.t1	45.4307	1.61861	0.428762	3.77507	0.000159962	0.00194403	g15942.t1
g7995.t1	109.302	1.06201	0.281956	3.76658	0.000165496	0.00199917	g7995.t1
g44445.t1	37.3938	1.86639	0.497445	3.75195	0.000175467	0.00210457	g44445.t1
g26687.t1	97.2065	1.15093	0.310256	3.70962	0.000207574	0.00244054	g26687.t1
g7469.t1	65.5421	-1.45795	0.393185	-3.70807	0.000208848	0.00245362	g7469.t1
g32198.t1	156.233	1.00169	0.270355	3.70507	0.00021133	0.00247642	g32198.t1
g37498.t1	100.893	-1.07318	0.290641	-3.69246	0.000222095	0.00258131	g37498.t1
g13998.t1	17.8664	3.64373	0.98977	3.68139	0.000231968	0.00267966	g13998.t1
g44917.t2	258.51	2.07336	0.567428	3.65395	0.000258232	0.00293949	g44917.t2
g44602.t1	80.3164	1.181	0.325292	3.6306	0.000282768	0.00318539	g44602.t1
g22169.t1	98.3193	1.11509	0.307362	3.62793	0.000285707	0.00321254	g22169.t1
g33188.t1	33.2906	-1.89191	0.524249	-3.6088	0.000307616	0.00341467	g33188.t1
g1446.t1	34.5794	-2.53803	0.703458	-3.60794	0.000308641	0.0034223	g1446.t1
g45197.t1	261.21	1.14134	0.316829	3.6024	0.000315297	0.00348086	g45197.t1
g2419.t1	5.92198	6.03244	1.67815	3.5947	0.000324762	0.00357368	g2419.t1
g307.t1	225.622	1.00813	0.281061	3.58688	0.00033466	0.00366799	g307.t1
g30509.t1	347.516	-1.82692	0.50986	-3.58318	0.000339442	0.00371103	g30509.t1
g871.t1	57.4681	-1.65817	0.466536	-3.55422	0.000379106	0.00408587	g871.t1
g32150.t1	45.5773	-1.72086	0.487128	-3.53266	0.000411398	0.0043857	g32150.t1
g18287.t1	81.9874	-1.15059	0.328654	-3.50093	0.000463637	0.00486298	g18287.t1
g10979.t1	133.415	1.0979	0.314196	3.49432	0.000475273	0.00497074	g10979.t1
g30280.t1	68.581	1.18005	0.337748	3.49387	0.000476079	0.00497746	g30280.t1
g18389.t1	83.5469	-1.17855	0.337836	-3.48851	0.00048572	0.00506084	g18389.t1
g3803.t1	83.338	-1.09229	0.313398	-3.48532	0.000491553	0.00511812	g3803.t1
g13997.t1	22.6832	2.24791	0.64558	3.482	0.000497677	0.00517124	g13997.t1
g41805.t1	86.3339	1.07395	0.313283	3.42805	0.000607941	0.00617965	g41805.t1
g39248.t1	54.079	1.46525	0.428834	3.41682	0.000633574	0.00639954	g39248.t1
g29641.t1	69.3764	1.12427	0.330083	3.40603	0.000659138	0.00662254	g29641.t1
g7991.t2	434.302	-1.66939	0.492832	-3.38734	0.000705748	0.00703272	g7991.t2
g2538.t1	48.1085	-1.43729	0.424418	-3.38651	0.000707886	0.00705172	g2538.t1
g34905.t1	5.54616	5.93859	1.76247	3.36948	0.000753109	0.00743124	g34905.t1
g3492.t1	47.7763	-1.39769	0.414915	-3.36862	0.000755447	0.0074498	g3492.t1
g24352.t1	43.8973	-1.53282	0.455734	-3.36341	0.000769872	0.00757485	g24352.t1
g30158.t1	71.0729	1.17408	0.349448	3.35981	0.00077996	0.00766171	g30158.t1
g26592.t1	77.7118	1.05679	0.316602	3.33792	0.000844094	0.00819896	g26592.t1
g14805.t1	46.6545	1.48191	0.444303	3.33535	0.000851927	0.0082592	g14805.t1
g38175.t1	64.2775	-1.26566	0.379783	-3.3326	0.000860401	0.00832543	g38175.t1
g19313.t1	34.3795	1.79341	0.538928	3.32773	0.000875563	0.00844566	g19313.t1
g32475.t1	105.286	-1.10928	0.335487	-3.30648	0.000944755	0.0090211	g32475.t1
g15865.t1	94.0027	-1.18029	0.35883	-3.28926	0.0010045	0.00949313	g15865.t1
g42522.t2	762.571	-1.79583	0.5506	-3.2616	0.00110786	0.0103254	g42522.t2
g43097.t1	74.6327	-1.09939	0.339045	-3.24262	0.00118437	0.0109312	g43097.t1
g19646.t1	61.7277	1.206	0.372059	3.24142	0.00118935	0.0109706	g19646.t1
g30707.t1	85.043	-1.00352	0.313394	-3.2021	0.00136429	0.0123187	g30707.t1
g23108.t1	76.1553	-1.03869	0.326069	-3.18549	0.00144507	0.0129291	g23108.t1
g6921.t1	4.55099	5.65299	1.78605	3.16508	0.0015504	0.0137177	g6921.t1
g28420.t1	96.7023	1.0958	0.346754	3.16016	0.00157683	0.0138992	g28420.t1
g42011.t1	4.54075	5.65	1.78841	3.15924	0.00158182	0.0139351	g42011.t1
g10023.t1	77.3666	-1.07329	0.341465	-3.14319	0.00167118	0.0145871	g10023.t1
g6141.t2	158.962	-1.07882	0.343577	-3.13995	0.00168975	0.014728	g6141.t2
g18614.t1	86.9496	-1.02347	0.32645	-3.13516	0.00171762	0.0149367	g18614.t1
g9219.t2	409.548	12.1445	3.90687	3.10849	0.00188046	0.0161494	g9219.t2
g24275.t1	39.4475	1.93516	0.626427	3.0892	0.00200699	0.0171008	g24275.t1
g16451.t1	96.0261	-1.46441	0.477118	-3.06929	0.00214569	0.0181351	g16451.t1
g20638.t1	31.1759	1.56255	0.509226	3.06848	0.00215147	0.0181638	g20638.t1
g36638.t1	342.61	-11.846	3.90689	-3.03207	0.00242885	0.0200652	g36638.t1
g31648.t1	43.7692	-2.13782	0.705319	-3.031	0.00243743	0.0201034	g31648.t1
g7274.t1	66.542	-1.06117	0.351319	-3.02053	0.00252335	0.0207052	g7274.t1
g24721.t1	49.4879	-1.46233	0.484118	-3.0206	0.00252273	0.0207052	g24721.t1
g39154.t1	31.4006	-1.52709	0.506396	-3.01561	0.00256464	0.020976	g39154.t1
g37909.t1	64.3106	-1.16192	0.387356	-2.99963	0.00270307	0.021943	g37909.t1
g12272.t1	4.04676	5.48353	1.83935	2.98123	0.00287094	0.0231143	g12272.t1
g3890.t1	72.879	-1.00272	0.3364	-2.98072	0.00287569	0.0231403	g3890.t1
g43701.t1	37.8902	1.47169	0.493934	2.97952	0.00288698	0.0232127	g43701.t1
g2865.t1	50.5235	-1.17664	0.395098	-2.9781	0.00290044	0.0232963	g2865.t1
g35455.t1	66.0567	1.05096	0.355554	2.95585	0.00311813	0.0246655	g35455.t1
g28837.t1	70.2491	-1.09012	0.369441	-2.95073	0.00317022	0.0249812	g28837.t1
g13023.t1	180.46	1.05516	0.357605	2.95064	0.00317119	0.0249823	g13023.t1
g21571.t1	5.43142	5.90762	2.00254	2.95006	0.00317709	0.0250094	g21571.t1
g23711.t1	52.7917	-1.40411	0.476574	-2.94625	0.0032165	0.0252477	g23711.t1
g36417.t1	73.7878	1.06574	0.361811	2.94557	0.00322364	0.0252907	g36417.t1
g29750.t1	55.5607	1.17469	0.399509	2.94032	0.00327871	0.0256565	g29750.t1
g11292.t1	354.178	-1.43797	0.489514	-2.93755	0.00330818	0.0258604	g11292.t1
g13985.t1	49.9384	-1.14847	0.394796	-2.90901	0.00362572	0.027912	g13985.t1
g42887.t1	33.3496	-1.48992	0.512306	-2.90826	0.0036345	0.0279725	g42887.t1
g40038.t1	52.2197	-1.21712	0.418938	-2.90526	0.00366949	0.0282275	g40038.t1
g18685.t1	5.22825	5.85306	2.02211	2.89454	0.00379718	0.0290553	g18685.t1
g22499.t1	5.30301	-5.83182	2.01603	-2.89273	0.00381911	0.0291582	g22499.t1
g29115.t1	44.5724	-1.41696	0.490621	-2.88808	0.00387596	0.0294579	g29115.t1
g6549.t1	47.334	-1.23035	0.42634	-2.88585	0.00390353	0.0295904	g6549.t1
g16111.t1	3.89688	5.42852	1.88455	2.88055	0.00396987	0.0300215	g16111.t1
g19428.t1	27.9367	-1.74886	0.607616	-2.87823	0.00399919	0.0301906	g19428.t1
g22136.t3	889.05	-1.5433	0.536639	-2.87586	0.00402934	0.0303429	g22136.t3
g31589.t1	71.936	-1.03842	0.361291	-2.8742	0.00405048	0.0304492	g31589.t1
g34812.t2	214.538	11.2117	3.90697	2.86966	0.0041091	0.0307985	g34812.t2
g35869.t1	5.23043	-5.81287	2.02798	-2.86634	0.00415254	0.0310475	g35869.t1
g5226.t1	215.979	-11.1803	3.90697	-2.86163	0.00421466	0.0314424	g5226.t1
g29616.t2	90.8376	-1.19534	0.418286	-2.85772	0.00426692	0.0317077	g29616.t2
g2726.t1	66.118	-1.13369	0.396812	-2.85701	0.00427657	0.0317406	g2726.t1
g18164.t1	66.2629	1.02686	0.360591	2.84772	0.00440335	0.0325623	g18164.t1
g11694.t1	55.7696	1.10517	0.388181	2.84705	0.00441269	0.0326234	g11694.t1
g15179.t1	59.1432	-1.09015	0.384606	-2.83446	0.00459029	0.0337476	g15179.t1
g18578.t1	3.77028	-5.34041	1.89303	-2.82108	0.0047862	0.0349848	g18578.t1
g15937.t1	71.3099	1.22926	0.436998	2.81297	0.00490856	0.0357246	g15937.t1
g24821.t1	51.3218	1.21776	0.434719	2.80125	0.00509044	0.0367987	g24821.t1
g7902.t1	55.2948	-1.04437	0.373598	-2.79543	0.00518304	0.0373467	g7902.t1
g39049.t1	53.9729	-1.20744	0.432162	-2.79396	0.00520667	0.037508	g39049.t1
g24100.t1	4.89018	-5.71602	2.05129	-2.78655	0.00532726	0.0382498	g24100.t1
g24949.t1	46.233	-1.20196	0.432171	-2.78122	0.00541543	0.0387182	g24949.t1
g27042.t1	4.8473	5.74456	2.0657	2.78092	0.00542046	0.0387359	g27042.t1
g34585.t1	58.2258	-1.06212	0.382796	-2.77463	0.00552641	0.0393358	g34585.t1
g32062.t1	4.74519	5.71285	2.06622	2.76488	0.00569435	0.0402578	g32062.t1
g19938.t1	24.2969	-1.58342	0.574557	-2.75591	0.00585295	0.0411493	g19938.t1
g17129.t1	31.8823	-2.07653	0.754216	-2.75323	0.0059011	0.0413731	g17129.t1
g10385.t1	4.68449	5.69522	2.06919	2.7524	0.0059161	0.0414305	g10385.t1
g19091.t1	79.3139	1.02404	0.372949	2.74578	0.00603672	0.042033	g19091.t1
g38550.t1	4.71508	-5.6636	2.06723	-2.7397	0.00614946	0.0426033	g38550.t1
g9821.t1	4.72999	-5.66793	2.0688	-2.73971	0.00614933	0.0426033	g9821.t1
g27772.t1	56.9076	1.05634	0.38688	2.7304	0.00632575	0.043596	g27772.t1
g46084.t1	57.8066	-1.04125	0.381785	-2.72731	0.0063853	0.0439666	g46084.t1
g11368.t1	64.1594	1.0691	0.39575	2.70146	0.00690355	0.046793	g11368.t1
g24995.t2	29.4262	1.41404	0.525271	2.69201	0.0071022	0.0479363	g24995.t2
g41918.t1	52.0357	-1.16929	0.436042	-2.6816	0.00732712	0.0492031	g41918.t1
g9854.t2	103.895	-1.1381	0.424658	-2.68004	0.00736142	0.0493653	g9854.t2
