# Supplementary material
Source: Research Square preprint supplement (doi:10.21203/rs.3.rs-9029043/v1)
Supplement: Supplementary file 3 [file 4947253e5580733d778d87f7.xlsx]

## Sheet: Mvs.C up fc2
Table S4. KEGG pathway and functional classification of Nicotiana benthamiana transcriptomes using eggNOG-mapper
Term Name	MainClass	GeneHitsInSelectedSet	AllGenesInSelectedSet	GeneHitsInBackground	AllGenesInBackground	p-value	enrichFactor	GeneListInSelectedSets	corrected p-value(BH method)
03110 Chaperones and folding catalysts	A09180 Brite Hierarchies	6	24	546	16825	9.28476e-05	7.70375	[g15980.t1, g13997.t1, g13998.t1, g15982.t1, g13995.t1, g34905.t1]	0.00343536
03000 Transcription factors	A09180 Brite Hierarchies	5	24	857	16825	0.00641257	4.09009	[g633.t1, g31416.t1, g34812.t2, g44917.t2, g9219.t2]	0.118632
00199 Cytochrome P450	A09180 Brite Hierarchies	2	24	156	16825	0.0206274	8.98771	[g33530.t1, g23862.t1]	0.254404
00905 Brassinosteroid biosynthesis	A09100 Metabolism	1	24	18	16825	0.0253798	38.9468	[g23862.t1]	0.234763
04030 G protein-coupled receptors	A09180 Brite Hierarchies	1	24	22	16825	0.0309353	31.8655	[g8282.t2]	0.228921
99977 Transport	A09190 Not Included in Pathway or Brite	1	24	32	16825	0.0446917	21.9076	[g20951.t1]	0.275599
00940 Phenylpropanoid biosynthesis	A09100 Metabolism	2	24	276	16825	0.0584038	5.08001	[g17759.t1, g1824.t1]	0.308706
04040 Ion channels	A09180 Brite Hierarchies	1	24	72	16825	0.0978687	9.73669	[g26828.t1]	0.452643
00592 alpha-Linolenic acid metabolism	A09100 Metabolism	1	24	74	16825	0.100452	9.47354	[g33530.t1]	0.412968
B 09193 Unclassified: signaling and cellular processes	A09190 Not Included in Pathway or Brite	1	24	102	16825	0.135878	6.87296	[g20951.t1]	0.502747
B 09110 Biosynthesis of other secondary metabolites	A09100 Metabolism	2	24	498	16825	0.15777	2.81543	[g17759.t1, g1824.t1]	0.530681
00240 Pyrimidine metabolism	A09100 Metabolism	1	24	121	16825	0.159151	5.79373	[g2419.t1]	0.490715
00195 Photosynthesis	A09100 Metabolism	1	24	125	16825	0.163973	5.60833	[g45715.t1]	0.466693
00194 Photosynthesis proteins	A09180 Brite Hierarchies	1	24	192	16825	0.240916	3.65126	[g45715.t1]	0.636706
03018 RNA degradation	A09120 Genetic Information Processing	1	24	210	16825	0.260401	3.33829	[g34812.t2]	0.642322
B 09104 Nucleotide metabolism	A09100 Metabolism	1	24	235	16825	0.28667	2.98316	[g2419.t1]	0.662924
00520 Amino sugar and nucleotide sugar metabolism	A09100 Metabolism	1	24	242	16825	0.293864	2.89687	[g43387.t1]	0.639585
B 09109 Metabolism of terpenoids and polyketides	A09100 Metabolism	1	24	338	16825	0.38577	2.07409	[g23862.t1]	0.792971
02000 Transporters	A09180 Brite Hierarchies	2	24	972	16825	0.407545	1.44247	[g7045.t1, g41191.t1]	0.79364
A09180 Brite Hierarchies	A09180 Brite Hierarchies	19	24	12635	16825	0.426361	1.0542	[g8282.t2, g26828.t1, g7045.t1, g41191.t1, g31416.t1, g45715.t1, g44917.t2, g4855.t3, g633.t1, g33530.t1, g15980.t1, g34812.t2, g13997.t1, g13998.t1, g23862.t1, g15982.t1, g13995.t1, g34905.t1, g9219.t2]	0.788768
A09100 Metabolism	A09100 Metabolism	7	24	4348	16825	0.430194	1.12863	[g2419.t1, g17759.t1, g43387.t1, g33530.t1, g1824.t1, g45715.t1, g23862.t1]	0.757962
04626 Plant-pathogen interaction	A09150 Organismal Systems	1	24	394	16825	0.433965	1.77929	[g26828.t1]	0.729851
B 09159 Environmental adaptation	A09150 Organismal Systems	1	24	483	16825	0.503188	1.45143	[g26828.t1]	0.809476
A09150 Organismal Systems	A09150 Organismal Systems	1	24	483	16825	0.503188	1.45143	[g26828.t1]	0.809476
B 09183 Protein families: signaling and cellular processes	A09180 Brite Hierarchies	4	24	2657	16825	0.538576	1.05539	[g8282.t2, g26828.t1, g7045.t1, g41191.t1]	0.797093
01009 Protein phosphatases and associated proteins	A09180 Brite Hierarchies	1	24	587	16825	0.573812	1.19428	[g4855.t3]	0.816578
B 09103 Lipid metabolism	A09100 Metabolism	1	24	659	16825	0.616955	1.0638	[g33530.t1]	0.845457
B 09102 Energy metabolism	A09100 Metabolism	1	24	709	16825	0.644419	0.988775	[g45715.t1]	0.851553
B 09181 Protein families: metabolism	A09180 Brite Hierarchies	4	24	3031	16825	0.650859	0.925162	[g4855.t3, g33530.t1, g45715.t1, g23862.t1]	0.830406
A09190 Not Included in Pathway or Brite	A09190 Not Included in Pathway or Brite	1	24	788	16825	0.684003	0.889647	[g20951.t1]	0.843604
03029 Mitochondrial biogenesis	A09180 Brite Hierarchies	1	24	796	16825	0.687767	0.880706	[g7045.t1]	0.820884
B 09182 Protein families: genetic information processing	A09180 Brite Hierarchies	12	24	8977	16825	0.704145	0.937117	[g633.t1, g7045.t1, g15980.t1, g31416.t1, g34812.t2, g13997.t1, g13998.t1, g44917.t2, g15982.t1, g13995.t1, g34905.t1, g9219.t2]	0.814167
03019 Messenger RNA biogenesis	A09180 Brite Hierarchies	1	24	875	16825	0.722704	0.80119	[g34812.t2]	0.810305
04121 Ubiquitin system	A09180 Brite Hierarchies	1	24	1237	16825	0.840235	0.566727	[g34812.t2]	0.914373
B 09101 Carbohydrate metabolism	A09100 Metabolism	1	24	1387	16825	0.873345	0.505437	[g43387.t1]	0.92325
B 09123 Folding, sorting and degradation	A09120 Genetic Information Processing	1	24	1427	16825	0.880996	0.49127	[g34812.t2]	0.905468
A09120 Genetic Information Processing	A09120 Genetic Information Processing	1	24	3320	16825	0.994904	0.211157	[g34812.t2]	0.994904

## Sheet: Mvs.C down fc2
Table S4. KEGG pathway and functional classification of Nicotiana benthamiana transcriptomes using eggNOG-mapper
Term Name	MainClass	GeneHitsInSelectedSet	AllGenesInSelectedSet	GeneHitsInBackground	AllGenesInBackground	p-value	enrichFactor	GeneListInSelectedSets	corrected p-value(BH method)
B 09110 Biosynthesis of other secondary metabolites	A09100 Metabolism	3	14	498	16825	0.00735475	7.23967	[g45623.t1, g27670.t1, g33882.t1]	0.308899
00902 Monoterpenoid biosynthesis	A09100 Metabolism	1	14	22	16825	0.0181583	54.6266	[g22535.t1]	0.381324
00940 Phenylpropanoid biosynthesis	A09100 Metabolism	2	14	276	16825	0.0214251	8.70859	[g45623.t1, g27670.t1]	0.299951
00966 Glucosinolate biosynthesis	A09100 Metabolism	1	14	38	16825	0.0311715	31.6259	[g33882.t1]	0.3273
00290 Valine, leucine and isoleucine biosynthesis	A09100 Metabolism	1	14	46	16825	0.0376178	26.1258	[g33882.t1]	0.31599
00945 Stilbenoid, diarylheptanoid and gingerol biosynthesis	A09100 Metabolism	1	14	61	16825	0.0495975	19.7014	[g45623.t1]	0.347183
00941 Flavonoid biosynthesis	A09100 Metabolism	1	14	72	16825	0.0582945	16.6915	[g45623.t1]	0.349767
00770 Pantothenate and CoA biosynthesis	A09100 Metabolism	1	14	74	16825	0.0598678	16.2403	[g33882.t1]	0.314306
00900 Terpenoid backbone biosynthesis	A09100 Metabolism	1	14	98	16825	0.078558	12.2631	[g22535.t1]	0.366604
00280 Valine, leucine and isoleucine degradation	A09100 Metabolism	1	14	99	16825	0.0793292	12.1392	[g33882.t1]	0.333183
00480 Glutathione metabolism	A09100 Metabolism	1	14	152	16825	0.119357	7.90648	[g26054.t1]	0.455725
01007 Amino acid related enzymes	A09180 Brite Hierarchies	1	14	156	16825	0.122311	7.70375	[g33882.t1]	0.428089
03000 Transcription factors	A09180 Brite Hierarchies	2	14	857	16825	0.157555	2.80463	[g39000.t2, g13430.t2]	0.509022
00270 Cysteine and methionine metabolism	A09100 Metabolism	1	14	212	16825	0.162718	5.6688	[g33882.t1]	0.488153
02000 Transporters	A09180 Brite Hierarchies	2	14	972	16825	0.192122	2.47281	[g17129.t1, g26054.t1]	0.537941
04016 MAPK signaling pathway - plant	A09130 Environmental Information Processing	1	14	315	16825	0.232562	3.81519	[g43771.t1]	0.610476
B 09109 Metabolism of terpenoids and polyketides	A09100 Metabolism	1	14	338	16825	0.247401	3.55558	[g22535.t1]	0.611226
B 09106 Metabolism of other amino acids	A09100 Metabolism	1	14	347	16825	0.253134	3.46336	[g26054.t1]	0.590647
04626 Plant-pathogen interaction	A09150 Organismal Systems	1	14	394	16825	0.282423	3.05022	[g43771.t1]	0.624303
A09100 Metabolism	A09100 Metabolism	5	14	4348	16825	0.283541	1.382	[g45623.t1, g27670.t1, g22535.t1, g26054.t1, g33882.t1]	0.595435
01003 Glycosyltransferases	A09180 Brite Hierarchies	1	14	400	16825	0.286084	3.00446	[g320.t1]	0.572168
03021 Transcription machinery	A09180 Brite Hierarchies	1	14	430	16825	0.304131	2.79485	[g235.t2]	0.580615
B 09159 Environmental adaptation	A09150 Organismal Systems	1	14	483	16825	0.334984	2.48817	[g43771.t1]	0.611709
A09150 Organismal Systems	A09150 Organismal Systems	1	14	483	16825	0.334984	2.48817	[g43771.t1]	0.611709
99980 Enzymes with EC numbers	A09190 Not Included in Pathway or Brite	1	14	495	16825	0.34179	2.42785	[g22535.t1]	0.574208
B 09108 Metabolism of cofactors and vitamins	A09100 Metabolism	1	14	503	16825	0.346292	2.38924	[g33882.t1]	0.559395
04075 Plant hormone signal transduction	A09130 Environmental Information Processing	1	14	542	16825	0.367832	2.21732	[g43771.t1]	0.572183
B 09191 Unclassified: metabolism	A09190 Not Included in Pathway or Brite	1	14	563	16825	0.379155	2.13461	[g22535.t1]	0.568733
03010 Ribosome	A09120 Genetic Information Processing	1	14	672	16825	0.434964	1.78837	[g35869.t1]	0.629948
03041 Spliceosome	A09180 Brite Hierarchies	1	14	678	16825	0.437897	1.77255	[g5226.t1]	0.613055
03011 Ribosome	A09180 Brite Hierarchies	1	14	709	16825	0.452824	1.69504	[g35869.t1]	0.613503
A09190 Not Included in Pathway or Brite	A09190 Not Included in Pathway or Brite	1	14	788	16825	0.489216	1.52511	[g22535.t1]	0.642096
03029 Mitochondrial biogenesis	A09180 Brite Hierarchies	1	14	796	16825	0.492773	1.50978	[g31648.t1]	0.627166
B 09105 Amino acid metabolism	A09100 Metabolism	1	14	796	16825	0.492773	1.50978	[g33882.t1]	0.627166
B 09132 Signal transduction	A09130 Environmental Information Processing	1	14	831	16825	0.508067	1.44619	[g43771.t1]	0.60968
A09130 Environmental Information Processing	A09130 Environmental Information Processing	1	14	856	16825	0.518727	1.40396	[g43771.t1]	0.605182
B 09183 Protein families: signaling and cellular processes	A09180 Brite Hierarchies	2	14	2657	16825	0.673289	0.904619	[g17129.t1, g26054.t1]	0.764274
B 09122 Translation	A09120 Genetic Information Processing	1	14	1317	16825	0.680691	0.912518	[g35869.t1]	0.752343
A09180 Brite Hierarchies	A09180 Brite Hierarchies	10	14	12635	16825	0.744431	0.951156	[g320.t1, g17129.t1, g39000.t2, g235.t2, g31648.t1, g13430.t2, g26054.t1, g35869.t1, g5226.t1, g33882.t1]	0.801695
B 09181 Protein families: metabolism	A09180 Brite Hierarchies	2	14	3031	16825	0.74745	0.792996	[g320.t1, g33882.t1]	0.784823
B 09182 Protein families: genetic information processing	A09180 Brite Hierarchies	6	14	8977	16825	0.854347	0.803243	[g39000.t2, g235.t2, g31648.t1, g13430.t2, g35869.t1, g5226.t1]	0.875185
A09120 Genetic Information Processing	A09120 Genetic Information Processing	1	14	3320	16825	0.953977	0.361984	[g35869.t1]	0.953977

## Sheet: Cvs.E.DOWN.fc2
Table S4. KEGG pathway and functional classification of Nicotiana benthamiana transcriptomes using eggNOG-mapper
Term Name	MainClass	GeneHitsInSelectedSet	AllGenesInSelectedSet	GeneHitsInBackground	AllGenesInBackground	p-value	enrichFactor	GeneListInSelectedSets	corrected p-value(BH method)
00195 Photosynthesis	A09100 Metabolism	20	187	125	16825	4.44089e-16	14.3957	[g46140.t1, g46030.t1, g46028.t1, g46029.t1, g8189.t1, g46147.t1, g46143.t1, g45715.t1, g46104.t1, g46120.t1, g19851.t1, g46103.t1, g46152.t1, g46154.t1, g22385.t1, g46156.t1, g46149.t1, g46148.t1, g16655.t1, g46150.t1]	4.44089e-14
00194 Photosynthesis proteins	A09180 Brite Hierarchies	20	187	192	16825	3.83027e-14	9.37221	[g46140.t1, g46030.t1, g46028.t1, g46029.t1, g8189.t1, g46147.t1, g46143.t1, g45715.t1, g46104.t1, g46120.t1, g19851.t1, g46103.t1, g46152.t1, g46154.t1, g22385.t1, g46156.t1, g46149.t1, g46148.t1, g16655.t1, g46150.t1]	1.91513e-12
A09100 Metabolism	A09100 Metabolism	93	187	4348	16825	1.76448e-12	1.92445	[g23727.t1, g33261.t1, g16932.t1, g11462.t1, g46030.t1, g33695.t1, g17759.t1, g43387.t1, g46028.t1, g46147.t1, g33037.t2, g46143.t1, g45715.t1, g46104.t1, g46120.t1, g22038.t1, g22385.t1, g26300.t1, g32200.t1, g23950.t1, g37861.t1, g24180.t1, g34681.t3, g30036.t1, g7134.t1, g44920.t1, g46140.t1, g30166.t1, g8493.t1, g260.t1, g1877.t1, g36625.t1, g30326.t1, g10114.t1, g20246.t1, g25919.t1, g31887.…	5.88159e-11
00940 Phenylpropanoid biosynthesis	A09100 Metabolism	17	187	276	16825	1.26203e-08	5.54183	[g41733.t1, g11462.t1, g8493.t1, g17759.t1, g27290.t1, g30326.t1, g10114.t1, g1824.t1, g44728.t1, g20246.t1, g31887.t1, g34185.t1, g1650.t1, g26300.t1, g36612.t1, g30036.t1, g44920.t1]	3.15507e-07
B 09102 Energy metabolism	A09100 Metabolism	26	187	709	16825	8.49116e-08	3.29944	[g46141.t1, g46030.t1, g46028.t1, g39520.t1, g46147.t1, g46143.t1, g45715.t1, g46104.t1, g46120.t1, g19851.t1, g46103.t1, g46151.t1, g22385.t1, g46148.t1, g20233.t2, g46119.t1, g46140.t1, g46029.t1, g8189.t1, g46152.t1, g19850.t1, g46154.t1, g46156.t1, g46149.t1, g16655.t1, g46150.t1]	1.69823e-06
99981 Carbohydrate metabolism	A09190 Not Included in Pathway or Brite	6	187	22	16825	1.11947e-07	24.5382	[g42395.t1, g46090.t1, g35619.t1, g46036.t1, g26744.t1, g23979.t1]	1.86579e-06
00062 Fatty acid elongation	A09100 Metabolism	8	187	55	16825	1.56193e-07	13.087	[g23727.t1, g42383.t1, g23950.t1, g27577.t1, g28871.t1, g43371.t1, g7134.t1, g26930.t1]	2.23132e-06
B 09181 Protein families: metabolism	A09180 Brite Hierarchies	63	187	3031	16825	1.7755e-07	1.87011	[g23322.t1, g29776.t1, g46030.t1, g46028.t1, g12885.t1, g35381.t1, g46147.t1, g40698.t1, g46143.t1, g45715.t1, g46104.t1, g46120.t1, g26538.t1, g22385.t1, g4558.t1, g6787.t1, g31373.t1, g46140.t1, g30166.t1, g22735.t1, g260.t1, g35800.t1, g2540.t1, g19717.t1, g46154.t1, g3478.t1, g655.t1, g33530.t1, g31372.t1, g26930.t1, g46150.t1, g44516.t1, g44680.t1, g4219.t1, g10979.t1, g15511.t1, g14266.t1, …	2.21938e-06
B 09110 Biosynthesis of other secondary metabolites	A09100 Metabolism	19	187	498	16825	3.0064e-06	3.43271	[g41733.t1, g11462.t1, g8493.t1, g17759.t1, g27290.t1, g30326.t1, g10114.t1, g1824.t1, g44728.t1, g20246.t1, g9268.t2, g31887.t1, g34185.t1, g22038.t1, g1650.t1, g26300.t1, g36612.t1, g30036.t1, g44920.t1]	3.34045e-05
00199 Cytochrome P450	A09180 Brite Hierarchies	10	187	156	16825	9.75084e-06	5.76752	[g260.t1, g10979.t1, g22324.t1, g33530.t1, g29316.t1, g31372.t1, g44728.t1, g6803.t1, g31373.t1, g44516.t1]	9.75084e-05
B 09101 Carbohydrate metabolism	A09100 Metabolism	33	187	1387	16825	2.36465e-05	2.14068	[g46141.t1, g33261.t1, g16932.t1, g16802.t1, g33695.t1, g43387.t1, g39520.t1, g7386.t1, g46151.t1, g26300.t1, g34733.t1, g32200.t1, g37861.t1, g46119.t1, g24180.t1, g7505.t1, g30036.t1, g44920.t1, g30166.t1, g1877.t1, g10712.t1, g36625.t1, g23184.t1, g25919.t1, g9993.t1, g19850.t1, g40092.t1, g19717.t1, g1650.t1, g11286.t1, g22872.t1, g978.t1, g44680.t1]	0.000214968
00040 Pentose and glucuronate interconversions	A09100 Metabolism	10	187	176	16825	2.78413e-05	5.11212	[g40092.t1, g16932.t1, g16802.t1, g11286.t1, g1877.t1, g10712.t1, g36625.t1, g24180.t1, g7505.t1, g978.t1]	0.000232011
02000 Transporters	A09180 Brite Hierarchies	26	187	972	16825	2.83461e-05	2.40669	[g45310.t1, g35492.t1, g5568.t1, g9850.t1, g41191.t1, g5285.t1, g38766.t1, g17370.t1, g7459.t1, g43679.t1, g41939.t1, g654.t1, g7241.t1, g25630.t1, g15946.t1, g1034.t1, g13048.t1, g14095.t1, g40359.t1, g39020.t1, g21732.t1, g37770.t1, g21133.t1, g9389.t1, g6553.t1, g1033.t1]	0.000218047
00500 Starch and sucrose metabolism	A09100 Metabolism	11	187	240	16825	7.93592e-05	4.12377	[g9993.t1, g33695.t1, g1650.t1, g26300.t1, g32200.t1, g22872.t1, g37861.t1, g23184.t1, g25919.t1, g30036.t1, g44920.t1]	0.000566851
B 09103 Lipid metabolism	A09100 Metabolism	18	187	659	16825	0.000408192	2.45754	[g23727.t1, g4219.t1, g22324.t1, g40565.t1, g27577.t1, g28871.t1, g33037.t2, g43371.t1, g2717.t1, g29598.t1, g42383.t1, g34733.t1, g655.t1, g33530.t1, g23950.t1, g34681.t3, g7134.t1, g26930.t1]	0.00272128
B 09191 Unclassified: metabolism	A09190 Not Included in Pathway or Brite	15	187	563	16825	0.00158932	2.39716	[g42395.t1, g46036.t1, g39566.t1, g31970.t1, g27033.t1, g26626.t1, g21151.t1, g38386.t1, g29716.t1, g46090.t1, g35619.t1, g26744.t1, g30148.t1, g1014.t1, g23979.t1]	0.00993323
01002 Peptidases and inhibitors	A09180 Brite Hierarchies	14	187	528	16825	0.00236704	2.38565	[g812.t1, g22735.t1, g35800.t1, g14266.t1, g14805.t1, g40698.t1, g23032.t1, g42235.t1, g4203.t2, g26538.t1, g4558.t1, g33820.t1, g6787.t1, g44883.t1]	0.0139237
00460 Cyanoamino acid metabolism	A09100 Metabolism	4	187	70	16825	0.00765883	5.14133	[g1650.t1, g26300.t1, g30036.t1, g44920.t1]	0.0425491
00190 Oxidative phosphorylation	A09100 Metabolism	8	187	263	16825	0.00929226	2.73683	[g19851.t1, g46140.t1, g46103.t1, g46148.t1, g46029.t1, g20233.t2, g46150.t1, g46120.t1]	0.0489066
00630 Glyoxylate and dicarboxylate metabolism	A09100 Metabolism	6	187	163	16825	0.00981995	3.3119	[g19850.t1, g46141.t1, g33261.t1, g46151.t1, g39520.t1, g46119.t1]	0.0490998
A09190 Not Included in Pathway or Brite	A09190 Not Included in Pathway or Brite	15	187	788	16825	0.0299113	1.71269	[g42395.t1, g46036.t1, g39566.t1, g31970.t1, g27033.t1, g26626.t1, g21151.t1, g38386.t1, g29716.t1, g46090.t1, g35619.t1, g26744.t1, g30148.t1, g1014.t1, g23979.t1]	0.142435
00710 Carbon fixation in photosynthetic organisms	A09100 Metabolism	5	187	161	16825	0.0340185	2.7942	[g19850.t1, g46141.t1, g46151.t1, g39520.t1, g46119.t1]	0.154629
01003 Glycosyltransferases	A09180 Brite Hierarchies	9	187	400	16825	0.035058	2.0244	[g28961.t1, g19717.t1, g30166.t1, g11043.t1, g3478.t1, g12885.t1, g35381.t1, g8154.t1, g44680.t1]	0.152426
B 09183 Protein families: signaling and cellular processes	A09180 Brite Hierarchies	39	187	2657	16825	0.0387953	1.32065	[g45310.t1, g35492.t1, g8282.t2, g5568.t1, g9850.t1, g41191.t1, g5285.t1, g40698.t1, g42235.t1, g5619.t1, g38766.t1, g17370.t1, g26538.t1, g7459.t1, g4558.t1, g43679.t1, g41939.t1, g654.t1, g7241.t1, g25630.t1, g15946.t1, g1034.t1, g13048.t1, g14095.t1, g12630.t1, g12630.t2, g26828.t1, g40359.t1, g14805.t1, g39020.t1, g21732.t1, g37770.t1, g16508.t1, g21133.t1, g16508.t2, g44883.t1, g9389.t1, g65…	0.161647
00950 Isoquinoline alkaloid biosynthesis	A09100 Metabolism	2	187	36	16825	0.0605019	4.99851	[g22038.t1, g9268.t2]	0.242008
01040 Biosynthesis of unsaturated fatty acids	A09100 Metabolism	2	187	40	16825	0.0728036	4.49866	[g43371.t1, g26930.t1]	0.280014
00600 Sphingolipid metabolism	A09100 Metabolism	2	187	43	16825	0.0825086	4.1848	[g4219.t1, g34733.t1]	0.305587
00073 Cutin, suberine and wax biosynthesis	A09100 Metabolism	2	187	44	16825	0.0858275	4.08969	[g22324.t1, g34681.t3]	0.306527
99980 Enzymes with EC numbers	A09190 Not Included in Pathway or Brite	9	187	495	16825	0.101415	1.63588	[g21151.t1, g38386.t1, g29716.t1, g39566.t1, g31970.t1, g27033.t1, g30148.t1, g1014.t1, g26626.t1]	0.349706
03060 Protein export	A09120 Genetic Information Processing	3	187	109	16825	0.121472	2.47633	[g12630.t1, g12630.t2, g5619.t1]	0.404908
00520 Amino sugar and nucleotide sugar metabolism	A09100 Metabolism	5	187	242	16825	0.133051	1.85895	[g19717.t1, g30166.t1, g43387.t1, g7386.t1, g44680.t1]	0.429195
00945 Stilbenoid, diarylheptanoid and gingerol biosynthesis	A09100 Metabolism	2	187	61	16825	0.147352	2.94994	[g44728.t1, g20246.t1]	0.460475
04626 Plant-pathogen interaction	A09150 Organismal Systems	7	187	394	16825	0.150271	1.59851	[g23727.t1, g42383.t1, g26828.t1, g23950.t1, g27577.t1, g28871.t1, g7134.t1]	0.455367
03110 Chaperones and folding catalysts	A09180 Brite Hierarchies	9	187	546	16825	0.15536	1.48308	[g26538.t1, g12630.t1, g12630.t2, g13997.t1, g5619.t1, g13998.t1, g15982.t1, g13995.t1, g34905.t1]	0.456941
00905 Brassinosteroid biosynthesis	A09100 Metabolism	1	187	18	16825	0.182318	4.99851	[g29316.t1]	0.520909
00941 Flavonoid biosynthesis	A09100 Metabolism	2	187	72	16825	0.190722	2.49926	[g44728.t1, g20246.t1]	0.529784
00603 Glycosphingolipid biosynthesis - globo and isoglobo series	A09100 Metabolism	1	187	19	16825	0.191416	4.73543	[g34733.t1]	0.51734
00561 Glycerolipid metabolism	A09100 Metabolism	3	187	138	16825	0.198512	1.95594	[g34733.t1, g655.t1, g2717.t1]	0.5224
00592 alpha-Linolenic acid metabolism	A09100 Metabolism	2	187	74	16825	0.19879	2.43171	[g33530.t1, g33037.t2]	0.509717
00350 Tyrosine metabolism	A09100 Metabolism	2	187	75	16825	0.202839	2.39929	[g22038.t1, g9268.t2]	0.507097
04030 G protein-coupled receptors	A09180 Brite Hierarchies	1	187	22	16825	0.218109	4.08969	[g8282.t2]	0.531974
00591 Linoleic acid metabolism	A09100 Metabolism	1	187	23	16825	0.226811	3.91188	[g33037.t2]	0.540026
01004 Lipid biosynthesis proteins	A09180 Brite Hierarchies	3	187	156	16825	0.250991	1.73026	[g655.t1, g43371.t1, g26930.t1]	0.5837
03020 RNA polymerase	A09120 Genetic Information Processing	2	187	94	16825	0.280823	1.91432	[g36787.t1, g3864.t2]	0.638233
A09150 Organismal Systems	A09150 Organismal Systems	7	187	483	16825	0.291371	1.30396	[g23727.t1, g42383.t1, g26828.t1, g23950.t1, g27577.t1, g28871.t1, g7134.t1]	0.647491
B 09159 Environmental adaptation	A09150 Organismal Systems	7	187	483	16825	0.291371	1.30396	[g23727.t1, g42383.t1, g26828.t1, g23950.t1, g27577.t1, g28871.t1, g7134.t1]	0.647491
00564 Glycerophospholipid metabolism	A09100 Metabolism	3	187	175	16825	0.308264	1.5424	[g655.t1, g40565.t1, g33037.t2]	0.65588
00537 Glycosylphosphatidylinositol (GPI)-anchored proteins	A09180 Brite Hierarchies	1	187	34	16825	0.316399	2.64627	[g26538.t1]	0.659165
00590 Arachidonic acid metabolism	A09100 Metabolism	1	187	40	16825	0.360832	2.24933	[g33037.t2]	0.736391
00565 Ether lipid metabolism	A09100 Metabolism	1	187	41	16825	0.367953	2.19447	[g33037.t2]	0.735905
00960 Tropane, piperidine and pyridine alkaloid biosynthesis	A09100 Metabolism	1	187	49	16825	0.422151	1.83619	[g9268.t2]	0.827747
00908 Zeatin biosynthesis	A09100 Metabolism	1	187	50	16825	0.428592	1.79947	[g16562.t1]	0.824216
00513 Various types of N-glycan biosynthesis	A09100 Metabolism	1	187	53	16825	0.44749	1.69761	[g11043.t1]	0.844321
00906 Carotenoid biosynthesis	A09100 Metabolism	1	187	57	16825	0.471724	1.57848	[g260.t1]	0.873564
00100 Steroid biosynthesis	A09100 Metabolism	1	187	61	16825	0.494901	1.47497	[g29598.t1]	0.89982
00230 Purine metabolism	A09100 Metabolism	2	187	153	16825	0.509111	1.17612	[g16508.t1, g16508.t2]	0.909126
B 09109 Metabolism of terpenoids and polyketides	A09100 Metabolism	4	187	338	16825	0.520055	1.06477	[g16562.t1, g260.t1, g15511.t1, g29316.t1]	0.912378
00510 N-Glycan biosynthesis	A09100 Metabolism	1	187	68	16825	0.533052	1.32314	[g11043.t1]	0.919055
00360 Phenylalanine metabolism	A09100 Metabolism	1	187	69	16825	0.538263	1.30396	[g9268.t2]	0.91231
01006 Prenyltransferases	A09180 Brite Hierarchies	1	187	69	16825	0.538263	1.30396	[g15511.t1]	0.91231
B 09106 Metabolism of other amino acids	A09100 Metabolism	4	187	347	16825	0.540805	1.03716	[g1650.t1, g26300.t1, g30036.t1, g44920.t1]	0.886566
04040 Ion channels	A09180 Brite Hierarchies	1	187	72	16825	0.553551	1.24963	[g26828.t1]	0.892824
00130 Ubiquinone and other terpenoid-quinone biosynthesis	A09100 Metabolism	1	187	74	16825	0.563462	1.21585	[g44728.t1]	0.894385
00400 Phenylalanine, tyrosine and tryptophan biosynthesis	A09100 Metabolism	1	187	81	16825	0.59646	1.11078	[g9268.t2]	0.931968
00052 Galactose metabolism	A09100 Metabolism	1	187	85	16825	0.614189	1.05851	[g34733.t1]	0.944906
B 09107 Glycan biosynthesis and metabolism	A09100 Metabolism	2	187	187	16825	0.617924	0.962281	[g11043.t1, g34733.t1]	0.936249
00900 Terpenoid backbone biosynthesis	A09100 Metabolism	1	187	98	16825	0.666629	0.918095	[g15511.t1]	0.994968
00053 Ascorbate and aldarate metabolism	A09100 Metabolism	1	187	114	16825	0.721534	0.789239	[g7386.t1]	1.06108
03016 Transfer RNA biogenesis	A09180 Brite Hierarchies	3	187	337	16825	0.726727	0.800949	[g46030.t1, g46147.t1, g46104.t1]	1.05323
B 09104 Nucleotide metabolism	A09100 Metabolism	2	187	235	16825	0.73879	0.76573	[g16508.t1, g16508.t2]	1.05541
04141 Protein processing in endoplasmic reticulum	A09120 Genetic Information Processing	6	187	702	16825	0.797371	0.769002	[g11043.t1, g12630.t1, g12630.t2, g2833.t1, g5619.t1, g19970.t1]	1.12306
04147 Exosome	A09180 Brite Hierarchies	10	187	1135	16825	0.817999	0.792716	[g4558.t1, g12630.t1, g12630.t2, g16508.t1, g16508.t2, g44883.t1, g14805.t1, g40698.t1, g42235.t1, g5619.t1]	1.13611
01007 Amino acid related enzymes	A09180 Brite Hierarchies	1	187	156	16825	0.826518	0.576752	[g4219.t1]	1.13222
B 09121 Transcription	A09120 Genetic Information Processing	4	187	532	16825	0.846683	0.676491	[g36787.t1, g23370.t1, g3864.t2, g17580.t1]	1.14417
04145 Phagosome	A09140 Cellular Processes	1	187	170	16825	0.851874	0.529254	[g26538.t1]	1.13583
03013 Nucleocytoplasmic transport	A09120 Genetic Information Processing	1	187	195	16825	0.888327	0.461401	[g23370.t1]	1.16885
03018 RNA degradation	A09120 Genetic Information Processing	1	187	210	16825	0.905757	0.428444	[g41580.t2]	1.17631
03040 Spliceosome	A09120 Genetic Information Processing	2	187	360	16825	0.912071	0.499851	[g23370.t1, g17580.t1]	1.16932
01001 Protein kinases	A09180 Brite Hierarchies	5	187	796	16825	0.944817	0.565159	[g23322.t1, g2540.t1, g29776.t1, g9935.t1, g30878.t1]	1.19597
03021 Transcription machinery	A09180 Brite Hierarchies	2	187	430	16825	0.954198	0.41848	[g36787.t1, g3864.t2]	1.19275
03015 mRNA surveillance pathway	A09120 Genetic Information Processing	1	187	294	16825	0.963668	0.306032	[g41580.t2]	1.18971
03000 Transcription factors	A09180 Brite Hierarchies	5	187	857	16825	0.964598	0.524932	[g5050.t1, g23114.t1, g24880.t1, g31416.t1, g30180.t1]	1.17634
04016 MAPK signaling pathway - plant	A09130 Environmental Information Processing	1	187	315	16825	0.971393	0.285629	[g10574.t1]	1.17035
03400 DNA repair and recombination proteins	A09180 Brite Hierarchies	2	187	484	16825	0.972722	0.37179	[g36787.t1, g3864.t2]	1.158
03041 Spliceosome	A09180 Brite Hierarchies	3	187	678	16825	0.982395	0.398112	[g41580.t2, g23370.t1, g17580.t1]	1.15576
B 09108 Metabolism of cofactors and vitamins	A09100 Metabolism	1	187	503	16825	0.99668	0.178873	[g44728.t1]	1.15893
B 09123 Folding, sorting and degradation	A09120 Genetic Information Processing	7	187	1427	16825	0.996846	0.441354	[g41580.t2, g11043.t1, g12630.t1, g12630.t2, g2833.t1, g5619.t1, g19970.t1]	1.1458
B 09105 Amino acid metabolism	A09100 Metabolism	2	187	796	16825	0.998856	0.226063	[g22038.t1, g9268.t2]	1.13506
03019 Messenger RNA biogenesis	A09180 Brite Hierarchies	2	187	875	16825	0.999506	0.205653	[g41580.t2, g23370.t1]	1.12304
A09140 Cellular Processes	A09140 Cellular Processes	1	187	744	16825	0.999798	0.120932	[g26538.t1]	1.11089
B 09141 Transport and catabolism	A09140 Cellular Processes	1	187	744	16825	0.999798	0.120932	[g26538.t1]	1.11089
03029 Mitochondrial biogenesis	A09180 Brite Hierarchies	1	187	796	16825	0.99989	0.113032	[g2540.t1]	1.08684
B 09132 Signal transduction	A09130 Environmental Information Processing	1	187	831	16825	0.999927	0.108271	[g10574.t1]	1.07519
A09130 Environmental Information Processing	A09130 Environmental Information Processing	1	187	856	16825	0.999946	0.105109	[g10574.t1]	1.06377
04131 Membrane trafficking	A09180 Brite Hierarchies	5	187	1793	16825	0.999992	0.250901	[g2540.t1, g12630.t1, g42380.t1, g12630.t2, g5619.t1]	1.05262
B 09122 Translation	A09120 Genetic Information Processing	2	187	1317	16825	0.999996	0.136634	[g41580.t2, g23370.t1]	1.04166
A09180 Brite Hierarchies	A09180 Brite Hierarchies	113	187	12635	16825	0.999997	0.804668	[g23322.t1, g46030.t1, g9850.t1, g12885.t1, g46147.t1, g35381.t1, g40698.t1, g45715.t1, g46104.t1, g17370.t1, g7459.t1, g6787.t1, g31373.t1, g15982.t1, g34905.t1, g22735.t1, g260.t1, g26828.t1, g40359.t1, g19717.t1, g3478.t1, g655.t1, g9389.t1, g46150.t1, g44516.t1, g30180.t1, g44680.t1, g5050.t1, g10979.t1, g41191.t1, g14266.t1, g44728.t1, g6803.t1, g5619.t1, g19851.t1, g654.t1, g29316.t1, g7241…	1.03092
03036 Chromosome and associated proteins	A09180 Brite Hierarchies	1	187	1194	16825	0.999999	0.0753545	[g33037.t2]	1.02041
A09120 Genetic Information Processing	A09120 Genetic Information Processing	11	187	3320	16825	1	0.298104	[g41580.t2, g36787.t1, g23370.t1, g11043.t1, g12630.t1, g3864.t2, g12630.t2, g2833.t1, g5619.t1, g17580.t1, g19970.t1]	1.0101
B 09182 Protein families: genetic information processing	A09180 Brite Hierarchies	25	187	8977	16825	1	0.250566	[g36787.t1, g23370.t1, g46030.t1, g5050.t1, g46147.t1, g31416.t1, g33037.t2, g5619.t1, g46104.t1, g26538.t1, g13998.t1, g15982.t1, g17580.t1, g34905.t1, g12630.t1, g12630.t2, g24880.t1, g41580.t2, g2540.t1, g3864.t2, g42380.t1, g23114.t1, g13997.t1, g30180.t1, g13995.t1]	1

## Sheet: Cvs.E.UP.fc2
Table S4. KEGG pathway and functional classification of Nicotiana benthamiana transcriptomes using eggNOG-mapper
Term Name	MainClass	GeneHitsInSelectedSet	AllGenesInSelectedSet	GeneHitsInBackground	AllGenesInBackground	p-value	enrichFactor	GeneListInSelectedSets	corrected p-value(BH method)
00196 Photosynthesis - antenna proteins	A09100 Metabolism	16	137	60	16825	0	32.7494	[g23644.t1, g23643.t1, g29711.t1, g29712.t2, g29712.t1, g25021.t1, g38359.t1, g38357.t1, g27442.t1, g23633.t1, g23634.t1, g23635.t1, g18831.t1, g2856.t1, g19987.t1, g38106.t1]	0
00909 Sesquiterpenoid and triterpenoid biosynthesis	A09100 Metabolism	5	137	44	16825	2.79919e-05	13.9557	[g22734.t1, g4524.t1, g10258.t1, g10274.t1, g23578.t1]	0.000415213
00591 Linoleic acid metabolism	A09100 Metabolism	2	137	23	16825	0.0148896	10.6791	[g38527.t1, g993.t1]	0.0697462
00194 Photosynthesis proteins	A09180 Brite Hierarchies	16	137	192	16825	3.90665e-12	10.2342	[g23644.t1, g23643.t1, g29711.t1, g29712.t2, g29712.t1, g25021.t1, g38359.t1, g38357.t1, g27442.t1, g23633.t1, g23634.t1, g23635.t1, g18831.t1, g2856.t1, g19987.t1, g38106.t1]	1.73846e-10
00904 Diterpenoid biosynthesis	A09100 Metabolism	3	137	36	16825	0.00309828	10.2342	[g1567.t1, g40376.t1, g29666.t1]	0.0196962
04712 Circadian rhythm - plant	A09150 Organismal Systems	6	137	89	16825	8.71989e-05	8.27934	[g31640.t1, g11209.t1, g4536.t1, g36947.t1, g19804.t1, g41760.t1]	0.000970088
00592 alpha-Linolenic acid metabolism	A09100 Metabolism	4	137	74	16825	0.00311577	6.63839	[g30335.t1, g27863.t1, g13968.t1, g6075.t1]	0.0184869
00966 Glucosinolate biosynthesis	A09100 Metabolism	2	137	38	16825	0.0382298	6.4637	[g37612.t1, g24111.t1]	0.162021
00945 Stilbenoid, diarylheptanoid and gingerol biosynthesis	A09100 Metabolism	3	137	61	16825	0.0134779	6.03985	[g15677.t1, g45623.t1, g24757.t1]	0.0666408
00480 Glutathione metabolism	A09100 Metabolism	7	137	152	16825	0.000246845	5.65573	[g26058.t1, g43000.t1, g43001.t1, g42999.t1, g26054.t1, g25740.t1, g23994.t1]	0.00219692
00902 Monoterpenoid biosynthesis	A09100 Metabolism	1	137	22	16825	0.164717	5.58228	[g22535.t1]	0.43117
99999 Others	A09190 Not Included in Pathway or Brite	1	137	25	16825	0.184983	4.91241	[g32133.t1]	0.457318
A09150 Organismal Systems	A09150 Organismal Systems	17	137	483	16825	4.06997e-07	4.32251	[g29839.t1, g19712.t2, g7668.t1, g19712.t1, g31.t1, g29696.t1, g19804.t1, g31640.t1, g44676.t2, g11209.t1, g4536.t1, g36947.t1, g6114.t1, g25537.t1, g45929.t1, g19537.t1, g41760.t1]	9.05568e-06
B 09159 Environmental adaptation	A09150 Organismal Systems	17	137	483	16825	4.06997e-07	4.32251	[g29839.t1, g19712.t2, g7668.t1, g19712.t1, g31.t1, g29696.t1, g19804.t1, g31640.t1, g44676.t2, g11209.t1, g4536.t1, g36947.t1, g6114.t1, g25537.t1, g45929.t1, g19537.t1, g41760.t1]	9.05568e-06
00906 Carotenoid biosynthesis	A09100 Metabolism	2	137	57	16825	0.0786154	4.30913	[g41113.t1, g44886.t1]	0.304207
B 09109 Metabolism of terpenoids and polyketides	A09100 Metabolism	11	137	338	16825	0.000101731	3.99678	[g41113.t1, g1567.t1, g40376.t1, g22734.t1, g4524.t1, g22535.t1, g10258.t1, g44886.t1, g10274.t1, g29666.t1, g23578.t1]	0.00100601
B 09106 Metabolism of other amino acids	A09100 Metabolism	10	137	347	16825	0.000553387	3.5392	[g26058.t1, g43000.t1, g43001.t1, g27863.t1, g15430.t1, g42999.t1, g26054.t1, g25740.t1, g23994.t1, g33059.t1]	0.00378857
04146 Peroxisome	A09140 Cellular Processes	5	137	178	16825	0.0152742	3.44973	[g2407.t1, g41023.t1, g27863.t1, g16476.t1, g10669.t2]	0.0679702
04626 Plant-pathogen interaction	A09150 Organismal Systems	11	137	394	16825	0.000382561	3.42871	[g44676.t2, g29839.t1, g6114.t1, g25537.t1, g19712.t2, g7668.t1, g19712.t1, g45929.t1, g31.t1, g29696.t1, g19537.t1]	0.00309527
00941 Flavonoid biosynthesis	A09100 Metabolism	2	137	72	16825	0.116549	3.41139	[g45623.t1, g24757.t1]	0.357686
00410 beta-Alanine metabolism	A09100 Metabolism	2	137	73	16825	0.119221	3.36466	[g27863.t1, g33059.t1]	0.353688
01040 Biosynthesis of unsaturated fatty acids	A09100 Metabolism	1	137	40	16825	0.279219	3.07026	[g27863.t1]	0.60611
04075 Plant hormone signal transduction	A09130 Environmental Information Processing	13	137	542	16825	0.00048664	2.94563	[g39842.t1, g20433.t1, g31.t1, g31214.t2, g16216.t1, g21044.t2, g4102.t1, g5192.t1, g29224.t1, g7190.t1, g96.t1, g1921.t1, g25128.t1]	0.00360925
B 09102 Energy metabolism	A09100 Metabolism	17	137	709	16825	6.42204e-05	2.94467	[g23644.t1, g23643.t1, g29711.t1, g29712.t2, g29712.t1, g25021.t1, g38359.t1, g38357.t1, g27442.t1, g23633.t1, g23634.t1, g23635.t1, g18831.t1, g2856.t1, g19987.t1, g38106.t1, g29050.t1]	0.000816517
00073 Cutin, suberine and wax biosynthesis	A09100 Metabolism	1	137	44	16825	0.302467	2.79114	[g41023.t1]	0.626036
00380 Tryptophan metabolism	A09100 Metabolism	2	137	93	16825	0.175331	2.64108	[g37612.t1, g24111.t1]	0.445842
00199 Cytochrome P450	A09180 Brite Hierarchies	3	137	156	16825	0.134632	2.36173	[g41113.t1, g1567.t1, g6075.t1]	0.374444
B 09132 Signal transduction	A09130 Environmental Information Processing	15	137	831	16825	0.0031685	2.21679	[g39842.t1, g7668.t1, g20433.t1, g31.t1, g31214.t2, g16216.t1, g21044.t2, g4102.t1, g5192.t1, g29224.t1, g7190.t1, g6114.t1, g96.t1, g1921.t1, g25128.t1]	0.0176248
A09130 Environmental Information Processing	A09130 Environmental Information Processing	15	137	856	16825	0.00417334	2.15205	[g39842.t1, g7668.t1, g20433.t1, g31.t1, g31214.t2, g16216.t1, g21044.t2, g4102.t1, g5192.t1, g29224.t1, g7190.t1, g6114.t1, g96.t1, g1921.t1, g25128.t1]	0.0218486
00500 Starch and sucrose metabolism	A09100 Metabolism	4	137	240	16825	0.132617	2.04684	[g22769.t2, g23095.t1, g2503.t1, g15430.t1]	0.38074
04016 MAPK signaling pathway - plant	A09130 Environmental Information Processing	5	137	315	16825	0.11495	1.94937	[g16216.t1, g7190.t1, g6114.t1, g7668.t1, g31.t1]	0.365377
00910 Nitrogen metabolism	A09100 Metabolism	1	137	63	16825	0.403122	1.94937	[g29050.t1]	0.763358
01003 Glycosyltransferases	A09180 Brite Hierarchies	6	137	400	16825	0.108691	1.84215	[g7341.t1, g23095.t1, g2503.t1, g37612.t1, g24111.t1, g35455.t1]	0.386942
A09100 Metabolism	A09100 Metabolism	64	137	4348	16825	1.02959e-07	1.80769	[g23095.t1, g30335.t1, g24178.t1, g23643.t1, g22734.t1, g43001.t1, g22535.t1, g29711.t1, g13968.t1, g38357.t1, g23633.t1, g18831.t1, g10258.t1, g26054.t1, g44886.t1, g29050.t1, g10669.t2, g23644.t1, g33212.t1, g41113.t1, g40376.t1, g43000.t1, g15430.t1, g42999.t1, g29712.t2, g29712.t1, g7924.t1, g35712.t1, g23634.t1, g15677.t1, g1567.t1, g37612.t1, g10989.t1, g38106.t1, g6075.t1, g993.t1, g5459.t…	3.05444e-06
00640 Propanoate metabolism	A09100 Metabolism	1	137	68	16825	0.427121	1.80603	[g27863.t1]	0.791954
00940 Phenylpropanoid biosynthesis	A09100 Metabolism	4	137	276	16825	0.188153	1.77986	[g45623.t1, g43114.t1, g15430.t1, g24757.t1]	0.452584
00460 Cyanoamino acid metabolism	A09100 Metabolism	1	137	70	16825	0.43645	1.75443	[g15430.t1]	0.792737
B 09191 Unclassified: metabolism	A09190 Not Included in Pathway or Brite	8	137	563	16825	0.0892885	1.74508	[g32133.t1, g10921.t1, g3452.t1, g24953.t1, g22535.t1, g29950.t1, g13434.t1, g13968.t1]	0.331112
00270 Cysteine and methionine metabolism	A09100 Metabolism	3	137	212	16825	0.248939	1.73788	[g33212.t1, g7924.t1, g22515.t1]	0.583042
99980 Enzymes with EC numbers	A09190 Not Included in Pathway or Brite	7	137	495	16825	0.109902	1.73671	[g10921.t1, g3452.t1, g24953.t1, g22535.t1, g29950.t1, g13434.t1, g13968.t1]	0.376202
B 09110 Biosynthesis of other secondary metabolites	A09100 Metabolism	7	137	498	16825	0.112483	1.72625	[g15677.t1, g45623.t1, g37612.t1, g43114.t1, g15430.t1, g24111.t1, g24757.t1]	0.370778
00130 Ubiquinone and other terpenoid-quinone biosynthesis	A09100 Metabolism	1	137	74	16825	0.454659	1.6596	[g43114.t1]	0.809293
00071 Fatty acid degradation	A09100 Metabolism	1	137	74	16825	0.454659	1.6596	[g27863.t1]	0.809293
03022 Basal transcription factors	A09120 Genetic Information Processing	1	137	78	16825	0.472283	1.57449	[g39308.t2]	0.808331
00400 Phenylalanine, tyrosine and tryptophan biosynthesis	A09100 Metabolism	1	137	81	16825	0.48513	1.51618	[g35712.t1]	0.814652
00630 Glyoxylate and dicarboxylate metabolism	A09100 Metabolism	2	137	163	16825	0.383819	1.50687	[g10989.t1, g10669.t2]	0.742607
00052 Galactose metabolism	A09100 Metabolism	1	137	85	16825	0.501776	1.44483	[g26766.t1]	0.827001
03000 Transcription factors	A09180 Brite Hierarchies	10	137	857	16825	0.161058	1.43302	[g6357.t1, g21044.t2, g22553.t1, g36275.t1, g39308.t2, g29839.t1, g7190.t1, g25128.t1, g16783.t1, g18614.t1]	0.434367
03021 Transcription machinery	A09180 Brite Hierarchies	5	137	430	16825	0.273158	1.42803	[g11310.t1, g39308.t2, g235.t2, g235.t1, g5617.t1]	0.607776
00860 Porphyrin and chlorophyll metabolism	A09100 Metabolism	1	137	89	16825	0.517888	1.37989	[g3014.t2]	0.838037
04130 SNARE interactions in vesicular transport	A09120 Genetic Information Processing	1	137	91	16825	0.525749	1.34956	[g24918.t1]	0.835566
00250 Alanine, aspartate and glutamate metabolism	A09100 Metabolism	1	137	92	16825	0.529632	1.33489	[g5459.t1]	0.826969
B 09103 Lipid metabolism	A09100 Metabolism	7	137	659	16825	0.290612	1.30451	[g38527.t1, g30335.t1, g41023.t1, g27863.t1, g13968.t1, g6075.t1, g993.t1]	0.61582
B 09181 Protein families: metabolism	A09180 Brite Hierarchies	32	137	3031	16825	0.0673243	1.29658	[g23095.t1, g23643.t1, g5459.t1, g29711.t1, g24111.t1, g38359.t1, g38357.t1, g27442.t1, g23633.t1, g23635.t1, g18831.t1, g6114.t1, g19987.t1, g25537.t1, g45929.t1, g7341.t1, g23644.t1, g41113.t1, g2503.t1, g29712.t2, g29712.t1, g25021.t1, g7668.t1, g35455.t1, g23634.t1, g1567.t1, g37612.t1, g2856.t1, g19273.t1, g38106.t1, g6075.t1, g19537.t1]	0.272357
02000 Transporters	A09180 Brite Hierarchies	10	137	972	16825	0.2682	1.26348	[g2407.t1, g31498.t1, g26058.t1, g43000.t1, g43001.t1, g13291.t2, g42999.t1, g26054.t1, g25740.t1, g23994.t1]	0.612046
00900 Terpenoid backbone biosynthesis	A09100 Metabolism	1	137	98	16825	0.552274	1.25317	[g22535.t1]	0.847455
A09190 Not Included in Pathway or Brite	A09190 Not Included in Pathway or Brite	8	137	788	16825	0.312589	1.2468	[g32133.t1, g10921.t1, g3452.t1, g24953.t1, g22535.t1, g29950.t1, g13434.t1, g13968.t1]	0.632282
B 09105 Amino acid metabolism	A09100 Metabolism	8	137	796	16825	0.322311	1.23427	[g33212.t1, g37612.t1, g5459.t1, g7924.t1, g24111.t1, g22515.t1, g33059.t1, g35712.t1]	0.63746
00020 Citrate cycle (TCA cycle)	A09100 Metabolism	1	137	107	16825	0.584224	1.14776	[g24178.t1]	0.866599
00330 Arginine and proline metabolism	A09100 Metabolism	1	137	108	16825	0.587631	1.13713	[g33059.t1]	0.857363
00010 Glycolysis / Gluconeogenesis	A09100 Metabolism	2	137	239	16825	0.582154	1.0277	[g15823.t1, g26766.t1]	0.878165
B 09101 Carbohydrate metabolism	A09100 Metabolism	10	137	1387	16825	0.701637	0.885438	[g22769.t2, g23095.t1, g2503.t1, g24178.t1, g10989.t1, g27863.t1, g15430.t1, g15823.t1, g10669.t2, g26766.t1]	0.991201
04070 Phosphatidylinositol signaling system	A09130 Environmental Information Processing	1	137	139	16825	0.680554	0.883527	[g6114.t1]	0.976924
A09140 Cellular Processes	A09140 Cellular Processes	5	137	744	16825	0.729852	0.825337	[g2407.t1, g41023.t1, g27863.t1, g16476.t1, g10669.t2]	1.01495
B 09141 Transport and catabolism	A09140 Cellular Processes	5	137	744	16825	0.729852	0.825337	[g2407.t1, g41023.t1, g27863.t1, g16476.t1, g10669.t2]	1.01495
01001 Protein kinases	A09180 Brite Hierarchies	5	137	796	16825	0.78214	0.771421	[g25537.t1, g19273.t1, g7668.t1, g45929.t1, g19537.t1]	1.0547
A09180 Brite Hierarchies	A09180 Brite Hierarchies	79	137	12635	16825	0.999998	0.767868	[g23095.t1, g36275.t1, g24178.t1, g23643.t1, g43001.t1, g2007.t1, g29711.t1, g5617.t1, g6003.t1, g13441.t1, g38357.t1, g23633.t1, g6357.t1, g31498.t1, g26885.t2, g34819.t1, g18831.t1, g26054.t1, g25680.t1, g25128.t1, g36872.t1, g7341.t1, g23644.t1, g41113.t1, g11310.t1, g235.t2, g235.t1, g45357.t1, g43000.t1, g28190.t1, g42999.t1, g29712.t2, g29712.t1, g24918.t1, g35455.t1, g18614.t1, g23634.t1, …	1.02299
B 09183 Protein families: signaling and cellular processes	A09180 Brite Hierarchies	16	137	2657	16825	0.930274	0.739542	[g26058.t1, g24178.t1, g43000.t1, g28190.t1, g43001.t1, g13291.t2, g42999.t1, g24918.t1, g22769.t2, g2407.t1, g31498.t1, g6114.t1, g26054.t1, g25680.t1, g25740.t1, g23994.t1]	1.16612
03110 Chaperones and folding catalysts	A09180 Brite Hierarchies	3	137	546	16825	0.826039	0.674781	[g36872.t1, g44303.t1, g45357.t1]	1.08114
04147 Exosome	A09180 Brite Hierarchies	6	137	1135	16825	0.907034	0.649217	[g22769.t2, g31498.t1, g24178.t1, g28190.t1, g6114.t1, g24918.t1]	1.16994
00620 Pyruvate metabolism	A09100 Metabolism	1	137	192	16825	0.793778	0.639637	[g10989.t1]	1.05442
03036 Chromosome and associated proteins	A09180 Brite Hierarchies	5	137	1194	16825	0.969989	0.514281	[g34819.t1, g28190.t1, g6114.t1, g6003.t1, g27065.t1]	1.16661
B 09108 Metabolism of cofactors and vitamins	A09100 Metabolism	2	137	503	16825	0.919196	0.488311	[g43114.t1, g3014.t2]	1.16869
04131 Membrane trafficking	A09180 Brite Hierarchies	7	137	1793	16825	0.992986	0.47946	[g35350.t1, g26885.t2, g34819.t1, g6114.t1, g2007.t1, g24918.t1, g13441.t1]	1.09106
B 09182 Protein families: genetic information processing	A09180 Brite Hierarchies	35	137	8977	16825	1	0.478819	[g43559.t2, g36275.t1, g29839.t1, g2007.t1, g5617.t1, g21817.t6, g6003.t1, g13441.t1, g6357.t1, g21044.t2, g44303.t1, g26885.t2, g34465.t1, g34819.t1, g6114.t1, g25128.t1, g36872.t1, g11310.t1, g235.t2, g235.t1, g45357.t1, g9014.t1, g28190.t1, g24918.t1, g34135.t1, g18614.t1, g35350.t1, g22553.t1, g39308.t2, g30394.t1, g7190.t1, g45570.t1, g19428.t1, g27065.t1, g16783.t1]	1
04121 Ubiquitin system	A09180 Brite Hierarchies	4	137	1237	16825	0.992169	0.397123	[g43559.t2, g21817.t6, g19428.t1, g34135.t1]	1.11776
03016 Transfer RNA biogenesis	A09180 Brite Hierarchies	1	137	337	16825	0.938166	0.364422	[g30394.t1]	1.15968
04812 Cytoskeleton proteins	A09180 Brite Hierarchies	1	137	343	16825	0.941186	0.358047	[g25680.t1]	1.14747
03029 Mitochondrial biogenesis	A09180 Brite Hierarchies	2	137	796	16825	0.990004	0.308568	[g30394.t1, g45570.t1]	1.14429
01002 Peptidases and inhibitors	A09180 Brite Hierarchies	1	137	528	16825	0.987553	0.232595	[g5459.t1]	1.1719
B 09121 Transcription	A09120 Genetic Information Processing	1	137	532	16825	0.987966	0.230846	[g39308.t2]	1.15696
03009 Ribosome biogenesis	A09180 Brite Hierarchies	1	137	570	16825	0.991272	0.215457	[g9014.t1]	1.13107
01009 Protein phosphatases and associated proteins	A09180 Brite Hierarchies	1	137	587	16825	0.992443	0.209217	[g6114.t1]	1.10409
03010 Ribosome	A09120 Genetic Information Processing	1	137	672	16825	0.996329	0.182753	[g34465.t1]	1.08138
04141 Protein processing in endoplasmic reticulum	A09120 Genetic Information Processing	1	137	702	16825	0.997157	0.174943	[g45357.t1]	1.06924
03011 Ribosome	A09180 Brite Hierarchies	1	137	709	16825	0.997322	0.173216	[g34465.t1]	1.05669
B 09123 Folding, sorting and degradation	A09120 Genetic Information Processing	2	137	1427	16825	0.99993	0.172124	[g45357.t1, g24918.t1]	1.04699
A09120 Genetic Information Processing	A09120 Genetic Information Processing	4	137	3320	16825	1	0.147964	[g39308.t2, g45357.t1, g34465.t1, g24918.t1]	1.01136
B 09122 Translation	A09120 Genetic Information Processing	1	137	1317	16825	0.999987	0.09325	[g34465.t1]	1.03487

## Sheet: Mvs.E up fc2
Table S4. KEGG pathway and functional classification of Nicotiana benthamiana transcriptomes using eggNOG-mapper
Term Name	MainClass	GeneHitsInSelectedSet	AllGenesInSelectedSet	GeneHitsInBackground	AllGenesInBackground	p-value	enrichFactor	GeneListInSelectedSets	corrected p-value(BH method)
00194 Photosynthesis proteins	A09180 Brite Hierarchies	20	106	192	16825	0	16.534	[g33369.t1, g23644.t1, g38108.t1, g23643.t1, g29711.t1, g27444.t1, g29712.t2, g29712.t1, g25021.t1, g23630.t1, g23984.t1, g38359.t1, g38357.t1, g27442.t1, g23634.t1, g23635.t1, g18831.t1, g2856.t1, g19987.t1, g38106.t1]	0
00196 Photosynthesis - antenna proteins	A09100 Metabolism	19	106	60	16825	1.11022e-16	50.2634	[g33369.t1, g23644.t1, g38108.t1, g23643.t1, g29711.t1, g27444.t1, g29712.t2, g29712.t1, g25021.t1, g23630.t1, g38359.t1, g38357.t1, g27442.t1, g23634.t1, g23635.t1, g18831.t1, g2856.t1, g19987.t1, g38106.t1]	4.71845e-15
A09100 Metabolism	A09100 Metabolism	56	106	4348	16825	2.65129e-09	2.04431	[g23095.t1, g24178.t1, g23643.t1, g22734.t1, g29711.t1, g27444.t1, g23630.t1, g24411.t2, g35417.t1, g13968.t1, g38357.t1, g7077.t1, g18831.t1, g44886.t1, g23644.t1, g33212.t1, g41113.t1, g40376.t1, g43000.t1, g42999.t1, g15430.t1, g29712.t2, g15250.t1, g29712.t1, g7924.t1, g23634.t1, g5826.t1, g15677.t1, g1567.t1, g37612.t1, g34351.t1, g38106.t1, g26338.t1, g6075.t1, g993.t1, g38108.t1, g5459.t1,…	7.512e-08
B 09102 Energy metabolism	A09100 Metabolism	20	106	709	16825	1.53274e-08	4.47747	[g33369.t1, g23644.t1, g38108.t1, g23643.t1, g29711.t1, g27444.t1, g29712.t2, g29712.t1, g25021.t1, g23630.t1, g23984.t1, g38359.t1, g38357.t1, g27442.t1, g23634.t1, g23635.t1, g18831.t1, g2856.t1, g19987.t1, g38106.t1]	3.25708e-07
B 09109 Metabolism of terpenoids and polyketides	A09100 Metabolism	11	106	338	16825	9.27665e-06	5.16565	[g41113.t1, g1567.t1, g40376.t1, g22734.t1, g4524.t1, g15250.t1, g44886.t1, g10274.t1, g29666.t1, g23578.t1, g23862.t1]	0.000157703
00904 Diterpenoid biosynthesis	A09100 Metabolism	4	106	36	16825	7.50646e-05	17.6363	[g1567.t1, g40376.t1, g15250.t1, g29666.t1]	0.00106341
00909 Sesquiterpenoid and triterpenoid biosynthesis	A09100 Metabolism	4	106	44	16825	0.000166428	14.4297	[g22734.t1, g4524.t1, g10274.t1, g23578.t1]	0.00202091
B 09181 Protein families: metabolism	A09180 Brite Hierarchies	33	106	3031	16825	0.000719032	1.72813	[g23095.t1, g38108.t1, g23643.t1, g5459.t1, g29711.t1, g27444.t1, g28857.t1, g23630.t1, g38359.t1, g38357.t1, g27442.t1, g23635.t1, g18831.t1, g19987.t1, g23862.t1, g41973.t1, g33369.t1, g23644.t1, g41113.t1, g29712.t2, g29712.t1, g25021.t1, g23984.t1, g35455.t1, g23634.t1, g1567.t1, g28276.t1, g37612.t1, g34351.t1, g2856.t1, g38106.t1, g6075.t1, g44778.t1]	0.00763972
04712 Circadian rhythm - plant	A09150 Organismal Systems	4	106	89	16825	0.00241036	7.13377	[g11209.t1, g4536.t1, g36947.t1, g19804.t1]	0.0227645
03000 Transcription factors	A09180 Brite Hierarchies	13	106	857	16825	0.00281771	2.40775	[g21330.t1, g21737.t1, g36275.t1, g29839.t1, g29751.t2, g20614.t1, g6357.t1, g21044.t2, g22553.t1, g633.t1, g7190.t1, g34812.t2, g16783.t1]	0.0239506
A09150 Organismal Systems	A09150 Organismal Systems	8	106	483	16825	0.0113107	2.62901	[g11209.t1, g29839.t1, g28276.t1, g4536.t1, g36947.t1, g28857.t1, g29696.t1, g19804.t1]	0.087401
B 09159 Environmental adaptation	A09150 Organismal Systems	8	106	483	16825	0.0113107	2.62901	[g11209.t1, g29839.t1, g28276.t1, g4536.t1, g36947.t1, g28857.t1, g29696.t1, g19804.t1]	0.087401
00199 Cytochrome P450	A09180 Brite Hierarchies	4	106	156	16825	0.0170295	4.06991	[g41113.t1, g1567.t1, g6075.t1, g23862.t1]	0.111347
00906 Carotenoid biosynthesis	A09100 Metabolism	2	106	57	16825	0.0501515	5.56935	[g41113.t1, g44886.t1]	0.304491
00480 Glutathione metabolism	A09100 Metabolism	3	106	152	16825	0.0712559	3.13276	[g43000.t1, g42999.t1, g23994.t1]	0.378547
B 09106 Metabolism of other amino acids	A09100 Metabolism	5	106	347	16825	0.0683704	2.28712	[g43000.t1, g42999.t1, g15430.t1, g23994.t1, g33059.t1]	0.387432
00592 alpha-Linolenic acid metabolism	A09100 Metabolism	2	106	74	16825	0.0792914	4.2899	[g13968.t1, g6075.t1]	0.396457
00905 Brassinosteroid biosynthesis	A09100 Metabolism	1	106	18	16825	0.107581	8.81813	[g23862.t1]	0.50802
00250 Alanine, aspartate and glutamate metabolism	A09100 Metabolism	2	106	92	16825	0.11442	3.45057	[g5826.t1, g5459.t1]	0.511878
04016 MAPK signaling pathway - plant	A09130 Environmental Information Processing	4	106	315	16825	0.137781	2.01557	[g16216.t1, g28276.t1, g7190.t1, g28857.t1]	0.532336
04075 Plant hormone signal transduction	A09130 Environmental Information Processing	6	106	542	16825	0.12734	1.75712	[g16216.t1, g21044.t2, g7190.t1, g5199.t1, g39842.t1, g1921.t1]	0.541196
00591 Linoleic acid metabolism	A09100 Metabolism	1	106	23	16825	0.135373	6.90115	[g993.t1]	0.547939
B 09132 Signal transduction	A09130 Environmental Information Processing	8	106	831	16825	0.153279	1.52805	[g16216.t1, g21044.t2, g28276.t1, g7190.t1, g5199.t1, g39842.t1, g28857.t1, g1921.t1]	0.566466
00740 Riboflavin metabolism	A09100 Metabolism	1	106	31	16825	0.178068	5.12021	[g24411.t2]	0.605432
A09130 Environmental Information Processing	A09130 Environmental Information Processing	8	106	856	16825	0.171763	1.48342	[g16216.t1, g21044.t2, g28276.t1, g7190.t1, g5199.t1, g39842.t1, g28857.t1, g1921.t1]	0.608326
00500 Starch and sucrose metabolism	A09100 Metabolism	3	106	240	16825	0.192885	1.98408	[g22769.t2, g23095.t1, g15430.t1]	0.630586
00966 Glucosinolate biosynthesis	A09100 Metabolism	1	106	38	16825	0.213709	4.17701	[g37612.t1]	0.672787
01040 Biosynthesis of unsaturated fatty acids	A09100 Metabolism	1	106	40	16825	0.223608	3.96816	[g34351.t1]	0.678809
00760 Nicotinate and nicotinamide metabolism	A09100 Metabolism	1	106	45	16825	0.247818	3.52725	[g5826.t1]	0.679502
00073 Cutin, suberine and wax biosynthesis	A09100 Metabolism	1	106	44	16825	0.243037	3.60742	[g26338.t1]	0.688604
04626 Plant-pathogen interaction	A09150 Organismal Systems	4	106	394	16825	0.236944	1.61144	[g29839.t1, g28276.t1, g28857.t1, g29696.t1]	0.69449
03021 Transcription machinery	A09180 Brite Hierarchies	4	106	430	16825	0.286833	1.47652	[g11310.t1, g5617.t1, g14246.t2, g44778.t1]	0.761899
04146 Peroxisome	A09140 Cellular Processes	2	106	178	16825	0.309169	1.78344	[g16476.t1, g26338.t1]	0.772923
00945 Stilbenoid, diarylheptanoid and gingerol biosynthesis	A09100 Metabolism	1	106	61	16825	0.320376	2.60207	[g15677.t1]	0.778057
00040 Pentose and glucuronate interconversions	A09100 Metabolism	2	106	176	16825	0.304521	1.80371	[g30292.t1, g35417.t1]	0.784373
00270 Cysteine and methionine metabolism	A09100 Metabolism	2	106	212	16825	0.386854	1.49742	[g33212.t1, g7924.t1]	0.802015
B 09103 Lipid metabolism	A09100 Metabolism	5	106	659	16825	0.401433	1.2043	[g34351.t1, g26338.t1, g13968.t1, g6075.t1, g993.t1]	0.812425
B 09105 Amino acid metabolism	A09100 Metabolism	6	106	796	16825	0.386668	1.19643	[g5826.t1, g33212.t1, g37612.t1, g5459.t1, g7924.t1, g33059.t1]	0.821669
00052 Galactose metabolism	A09100 Metabolism	1	106	85	16825	0.41641	1.86737	[g7077.t1]	0.823136
00061 Fatty acid biosynthesis	A09100 Metabolism	1	106	89	16825	0.431053	1.78344	[g34351.t1]	0.832716
00130 Ubiquinone and other terpenoid-quinone biosynthesis	A09100 Metabolism	1	106	74	16825	0.374189	2.14495	[g43114.t1]	0.837001
B 09110 Biosynthesis of other secondary metabolites	A09100 Metabolism	4	106	498	16825	0.384062	1.27491	[g15677.t1, g37612.t1, g43114.t1, g15430.t1]	0.837058
00380 Tryptophan metabolism	A09100 Metabolism	1	106	93	16825	0.445332	1.70674	[g37612.t1]	0.841182
00460 Cyanoamino acid metabolism	A09100 Metabolism	1	106	70	16825	0.358097	2.26752	[g15430.t1]	0.845507
00410 beta-Alanine metabolism	A09100 Metabolism	1	106	73	16825	0.370204	2.17433	[g33059.t1]	0.850468
01003 Glycosyltransferases	A09180 Brite Hierarchies	3	106	400	16825	0.463324	1.19045	[g23095.t1, g37612.t1, g35455.t1]	0.856143
00330 Arginine and proline metabolism	A09100 Metabolism	1	106	108	16825	0.495786	1.46969	[g33059.t1]	0.877955
00020 Citrate cycle (TCA cycle)	A09100 Metabolism	1	106	107	16825	0.492569	1.48342	[g24178.t1]	0.890816
00940 Phenylpropanoid biosynthesis	A09100 Metabolism	2	106	276	16825	0.521291	1.15019	[g43114.t1, g15430.t1]	0.904281
00240 Pyrimidine metabolism	A09100 Metabolism	1	106	121	16825	0.535818	1.31179	[g2419.t1]	0.91089
00195 Photosynthesis	A09100 Metabolism	1	106	125	16825	0.54749	1.26981	[g23984.t1]	0.912483
01004 Lipid biosynthesis proteins	A09180 Brite Hierarchies	1	106	156	16825	0.628615	1.01748	[g34351.t1]	0.989487
B 09108 Metabolism of cofactors and vitamins	A09100 Metabolism	3	106	503	16825	0.618102	0.946678	[g5826.t1, g43114.t1, g24411.t2]	0.991296
99980 Enzymes with EC numbers	A09190 Not Included in Pathway or Brite	3	106	495	16825	0.607189	0.961978	[g10921.t1, g21646.t2, g13968.t1]	0.99252
A09120 Genetic Information Processing	A09120 Genetic Information Processing	3	106	3320	16825	1	0.143427	[g45357.t1, g34465.t1, g34812.t2]	1
B 09182 Protein families: genetic information processing	A09180 Brite Hierarchies	34	106	8977	16825	0.999997	0.601169	[g21330.t1, g21737.t1, g36275.t1, g29839.t1, g29751.t2, g2007.t1, g20614.t1, g5617.t1, g21817.t6, g37615.t1, g6357.t1, g21044.t2, g17884.t1, g44303.t1, g633.t1, g26885.t2, g34819.t1, g34465.t1, g32378.t1, g36872.t1, g11310.t1, g45357.t1, g1235.t1, g9014.t1, g28190.t1, g14246.t2, g34135.t1, g22553.t1, g35350.t1, g7190.t1, g34812.t2, g25182.t1, g44778.t1, g16783.t1]	1.0119
B 09122 Translation	A09120 Genetic Information Processing	1	106	1317	16825	0.999828	0.120521	[g34465.t1]	1.02392
B 09123 Folding, sorting and degradation	A09120 Genetic Information Processing	2	106	1427	16825	0.999122	0.222462	[g45357.t1, g34812.t2]	1.03567
03110 Chaperones and folding catalysts	A09180 Brite Hierarchies	3	106	546	16825	0.673251	0.872123	[g36872.t1, g44303.t1, g45357.t1]	1.04048
B 09183 Protein families: signaling and cellular processes	A09180 Brite Hierarchies	8	106	2657	16825	0.996361	0.477912	[g37615.t1, g22769.t2, g24178.t1, g1235.t1, g43000.t1, g28190.t1, g42999.t1, g23994.t1]	1.04556
B 09191 Unclassified: metabolism	A09190 Not Included in Pathway or Brite	3	106	563	16825	0.693402	0.845789	[g10921.t1, g21646.t2, g13968.t1]	1.05249
03029 Mitochondrial biogenesis	A09180 Brite Hierarchies	1	106	796	16825	0.994223	0.199405	[g37615.t1]	1.05636
04131 Membrane trafficking	A09180 Brite Hierarchies	5	106	1793	16825	0.990899	0.442628	[g35350.t1, g26885.t2, g1235.t1, g34819.t1, g2007.t1]	1.06616
03011 Ribosome	A09180 Brite Hierarchies	1	106	709	16825	0.989727	0.223874	[g34465.t1]	1.07855
04141 Protein processing in endoplasmic reticulum	A09120 Genetic Information Processing	1	106	702	16825	0.989242	0.226106	[g45357.t1]	1.09202
03018 RNA degradation	A09120 Genetic Information Processing	1	106	210	16825	0.736988	0.75584	[g34812.t2]	1.09902
03010 Ribosome	A09120 Genetic Information Processing	1	106	672	16825	0.98689	0.2362	[g34465.t1]	1.10376
03036 Chromosome and associated proteins	A09180 Brite Hierarchies	3	106	1194	16825	0.983253	0.39881	[g34819.t1, g28190.t1, g44778.t1]	1.11435
A09180 Brite Hierarchies	A09180 Brite Hierarchies	71	106	12635	16825	0.977319	0.891933	[g21330.t1, g23095.t1, g36275.t1, g24178.t1, g23643.t1, g2007.t1, g29711.t1, g27444.t1, g20614.t1, g5617.t1, g28857.t1, g23630.t1, g38357.t1, g6357.t1, g17884.t1, g633.t1, g26885.t2, g34819.t1, g18831.t1, g32378.t1, g41973.t1, g36872.t1, g23644.t1, g41113.t1, g11310.t1, g45357.t1, g43000.t1, g28190.t1, g42999.t1, g29712.t2, g29712.t1, g14246.t2, g35455.t1, g23634.t1, g1567.t1, g28276.t1, g37612.t…	1.1226
B 09101 Carbohydrate metabolism	A09100 Metabolism	7	106	1387	16825	0.780821	0.801071	[g22769.t2, g23095.t1, g7077.t1, g24178.t1, g30292.t1, g15430.t1, g35417.t1]	1.12491
B 09104 Nucleotide metabolism	A09100 Metabolism	1	106	235	16825	0.775903	0.675432	[g2419.t1]	1.1371
01009 Protein phosphatases and associated proteins	A09180 Brite Hierarchies	1	106	587	16825	0.977092	0.270403	[g41973.t1]	1.13771
03019 Messenger RNA biogenesis	A09180 Brite Hierarchies	2	106	875	16825	0.97659	0.362803	[g17884.t1, g34812.t2]	1.15292
04144 Endocytosis	A09140 Cellular Processes	1	106	354	16825	0.895773	0.44838	[g1235.t1]	1.15365
01001 Protein kinases	A09180 Brite Hierarchies	3	106	796	16825	0.883393	0.598215	[g28276.t1, g28857.t1, g44778.t1]	1.15521
03009 Ribosome biogenesis	A09180 Brite Hierarchies	1	106	570	16825	0.974395	0.278467	[g9014.t1]	1.16653
A09190 Not Included in Pathway or Brite	A09190 Not Included in Pathway or Brite	3	106	788	16825	0.879154	0.604288	[g10921.t1, g21646.t2, g13968.t1]	1.16763
02000 Transporters	A09180 Brite Hierarchies	4	106	972	16825	0.867999	0.653195	[g37615.t1, g43000.t1, g42999.t1, g23994.t1]	1.17111
01002 Peptidases and inhibitors	A09180 Brite Hierarchies	1	106	528	16825	0.96631	0.300618	[g5459.t1]	1.17338
04121 Ubiquitin system	A09180 Brite Hierarchies	4	106	1237	16825	0.957471	0.513262	[g21817.t6, g32378.t1, g34812.t2, g34135.t1]	1.17949
04147 Exosome	A09180 Brite Hierarchies	4	106	1135	16825	0.933081	0.559388	[g22769.t2, g24178.t1, g1235.t1, g28190.t1]	1.18376
03012 Translation factors	A09180 Brite Hierarchies	1	106	285	16825	0.83743	0.556935	[g25182.t1]	1.18636
A09140 Cellular Processes	A09140 Cellular Processes	3	106	744	16825	0.853355	0.640026	[g1235.t1, g16476.t1, g26338.t1]	1.1891
B 09141 Transport and catabolism	A09140 Cellular Processes	3	106	744	16825	0.853355	0.640026	[g1235.t1, g16476.t1, g26338.t1]	1.1891
03400 DNA repair and recombination proteins	A09180 Brite Hierarchies	1	106	484	16825	0.955123	0.327947	[g14246.t2]	1.1939

## Sheet: Mvs.E down fc2
Table S4. KEGG pathway and functional classification of Nicotiana benthamiana transcriptomes using eggNOG-mapper
Term Name	MainClass	GeneHitsInSelectedSet	AllGenesInSelectedSet	GeneHitsInBackground	AllGenesInBackground	p-value	enrichFactor	GeneListInSelectedSets	corrected p-value(BH method)
00195 Photosynthesis	A09100 Metabolism	19	178	125	16825	0	14.3674	[g46140.t1, g46030.t1, g46028.t1, g46029.t1, g8189.t1, g46147.t1, g46143.t1, g46104.t1, g46120.t1, g19851.t1, g46103.t1, g46152.t1, g46154.t1, g22385.t1, g46156.t1, g46149.t1, g46148.t1, g16655.t1, g46150.t1]	0
00194 Photosynthesis proteins	A09180 Brite Hierarchies	19	178	192	16825	1.79523e-13	9.35379	[g46140.t1, g46030.t1, g46028.t1, g46029.t1, g8189.t1, g46147.t1, g46143.t1, g46104.t1, g46120.t1, g19851.t1, g46103.t1, g46152.t1, g46154.t1, g22385.t1, g46156.t1, g46149.t1, g46148.t1, g16655.t1, g46150.t1]	8.52735e-12
00940 Phenylpropanoid biosynthesis	A09100 Metabolism	20	178	276	16825	1.36157e-11	6.84945	[g41733.t1, g11462.t1, g30060.t1, g8493.t1, g27290.t1, g1824.t1, g44728.t1, g20246.t1, g35938.t1, g31887.t1, g34185.t1, g1650.t1, g27670.t1, g26300.t1, g36612.t1, g29988.t1, g8287.t1, g30036.t1, g826.t1, g44920.t1]	4.31163e-10
A09100 Metabolism	A09100 Metabolism	86	178	4348	16825	8.29384e-11	1.86958	[g33261.t1, g16932.t1, g37004.t1, g11462.t1, g46030.t1, g23099.t1, g33695.t1, g46028.t1, g24722.t1, g46147.t1, g46143.t1, g37983.t1, g46104.t1, g46120.t1, g46176.t1, g22385.t1, g26300.t1, g30076.t1, g23950.t1, g30036.t1, g7134.t1, g826.t1, g44920.t1, g46140.t1, g8493.t1, g1877.t1, g22326.t1, g20246.t1, g25919.t1, g35938.t1, g31887.t1, g2717.t1, g19850.t1, g34185.t1, g35888.t1, g46154.t1, g22872.t…	1.96979e-09
99981 Carbohydrate metabolism	A09190 Not Included in Pathway or Brite	7	178	22	16825	1.96599e-09	30.0753	[g42395.t1, g46090.t1, g35619.t1, g46036.t1, g32032.t1, g26744.t1, g23979.t1]	3.73538e-08
B 09110 Biosynthesis of other secondary metabolites	A09100 Metabolism	22	178	498	16825	1.51216e-08	4.17569	[g41733.t1, g11462.t1, g30060.t1, g8493.t1, g24722.t1, g27290.t1, g1824.t1, g44728.t1, g20246.t1, g35938.t1, g31887.t1, g34185.t1, g1650.t1, g27670.t1, g26300.t1, g36612.t1, g29988.t1, g8287.t1, g30036.t1, g826.t1, g44920.t1, g33882.t1]	2.39425e-07
B 09102 Energy metabolism	A09100 Metabolism	25	178	709	16825	1.23085e-07	3.33295	[g46141.t1, g46030.t1, g46028.t1, g39520.t1, g46147.t1, g46143.t1, g46104.t1, g46120.t1, g19851.t1, g46103.t1, g46151.t1, g22385.t1, g46148.t1, g20233.t2, g46119.t1, g46140.t1, g46029.t1, g8189.t1, g46152.t1, g19850.t1, g46154.t1, g46156.t1, g46149.t1, g16655.t1, g46150.t1]	1.67043e-06
02000 Transporters	A09180 Brite Hierarchies	28	178	972	16825	1.24171e-06	2.72287	[g45467.t1, g45310.t1, g35492.t1, g44497.t1, g5568.t1, g5285.t1, g5486.t1, g32440.t1, g38766.t1, g3047.t1, g17129.t1, g7459.t1, g5609.t1, g43679.t1, g41939.t1, g654.t1, g7241.t1, g25630.t1, g1034.t1, g13048.t1, g14095.t1, g35898.t1, g40359.t1, g21732.t1, g37770.t1, g9389.t1, g6553.t1, g1033.t1]	1.47453e-05
00062 Fatty acid elongation	A09100 Metabolism	6	178	55	16825	2.43055e-05	10.3115	[g42383.t1, g2306.t1, g23950.t1, g27577.t1, g28871.t1, g7134.t1]	0.000256558
B 09103 Lipid metabolism	A09100 Metabolism	19	178	659	16825	7.31521e-05	2.72523	[g4651.t1, g4219.t1, g23099.t1, g22324.t1, g22326.t1, g2306.t1, g40565.t1, g27577.t1, g10208.t1, g28871.t1, g2717.t1, g46176.t1, g35888.t1, g42383.t1, g658.t1, g34733.t1, g655.t1, g23950.t1, g7134.t1]	0.000694945
00073 Cutin, suberine and wax biosynthesis	A09100 Metabolism	5	178	44	16825	9.7403e-05	10.7412	[g46176.t1, g4651.t1, g658.t1, g22324.t1, g10208.t1]	0.000841208
03060 Protein export	A09120 Genetic Information Processing	7	178	109	16825	0.000158563	6.07025	[g45575.t1, g31698.t1, g12630.t1, g11256.t1, g23145.t1, g16353.t1, g5619.t1]	0.00125529
00199 Cytochrome P450	A09180 Brite Hierarchies	8	178	156	16825	0.000257168	4.84731	[g4651.t1, g658.t1, g22324.t1, g10208.t1, g44728.t1, g45163.t1, g35938.t1, g826.t1]	0.00174507
00500 Starch and sucrose metabolism	A09100 Metabolism	10	178	240	16825	0.000243073	3.93844	[g9993.t1, g33695.t1, g1650.t1, g26300.t1, g22872.t1, g30076.t1, g23184.t1, g25919.t1, g30036.t1, g44920.t1]	0.0017763
B 09101 Carbohydrate metabolism	A09100 Metabolism	29	178	1387	16825	0.000302049	1.97632	[g46141.t1, g33261.t1, g16932.t1, g37004.t1, g16802.t1, g23099.t1, g33695.t1, g39520.t1, g7386.t1, g46151.t1, g26300.t1, g34733.t1, g30076.t1, g46119.t1, g43564.t1, g7505.t1, g30036.t1, g44920.t1, g42645.t1, g1877.t1, g23184.t1, g25919.t1, g9993.t1, g19850.t1, g35888.t1, g1650.t1, g11286.t1, g22872.t1, g978.t1]	0.00191297
B 09181 Protein families: metabolism	A09180 Brite Hierarchies	50	178	3031	16825	0.00058859	1.55926	[g29776.t1, g46030.t1, g46028.t1, g24722.t1, g12885.t1, g46147.t1, g40698.t1, g21158.t1, g46143.t1, g46104.t1, g46120.t1, g22385.t1, g29570.t3, g826.t1, g46140.t1, g130.t1, g22735.t1, g35800.t1, g22326.t1, g35938.t1, g46154.t1, g655.t1, g45163.t1, g46150.t1, g33882.t1, g30083.t1, g4651.t1, g4219.t1, g14266.t1, g23032.t2, g44728.t1, g19851.t1, g46103.t1, g658.t1, g46148.t1, g42569.t1, g14532.t1, g…	0.00328918
00040 Pentose and glucuronate interconversions	A09100 Metabolism	8	178	176	16825	0.000576771	4.29648	[g42645.t1, g16932.t1, g37004.t1, g16802.t1, g11286.t1, g1877.t1, g7505.t1, g978.t1]	0.00342458
B 09183 Protein families: signaling and cellular processes	A09180 Brite Hierarchies	44	178	2657	16825	0.00129578	1.56529	[g45467.t1, g45310.t1, g30083.t1, g35492.t1, g44497.t1, g5568.t1, g32726.t1, g15368.t1, g12405.t1, g5285.t1, g5486.t1, g32440.t1, g40698.t1, g5619.t1, g38766.t1, g3047.t1, g17129.t1, g7459.t1, g5609.t1, g43679.t1, g41939.t1, g23145.t1, g654.t1, g30076.t1, g29570.t3, g7241.t1, g25630.t1, g1034.t1, g13048.t1, g45575.t1, g31698.t1, g14095.t1, g12630.t1, g35898.t1, g40359.t1, g21732.t1, g35888.t1, g1…	0.00683885
B 09191 Unclassified: metabolism	A09190 Not Included in Pathway or Brite	14	178	563	16825	0.00269129	2.35047	[g31544.t1, g42395.t1, g41815.t1, g46036.t1, g32032.t1, g39566.t1, g40418.t1, g27033.t1, g21151.t1, g38386.t1, g46090.t1, g35619.t1, g26744.t1, g23979.t1]	0.0134564
00945 Stilbenoid, diarylheptanoid and gingerol biosynthesis	A09100 Metabolism	4	178	61	16825	0.00395296	6.19819	[g44728.t1, g20246.t1, g35938.t1, g826.t1]	0.0187765
00460 Cyanoamino acid metabolism	A09100 Metabolism	4	178	70	16825	0.00645428	5.40128	[g1650.t1, g26300.t1, g30036.t1, g44920.t1]	0.029198
00941 Flavonoid biosynthesis	A09100 Metabolism	4	178	72	16825	0.00712513	5.25125	[g44728.t1, g20246.t1, g35938.t1, g826.t1]	0.0294299
00190 Oxidative phosphorylation	A09100 Metabolism	8	178	263	16825	0.00699727	2.87521	[g19851.t1, g46140.t1, g46103.t1, g46148.t1, g46029.t1, g20233.t2, g46150.t1, g46120.t1]	0.0302155
00630 Glyoxylate and dicarboxylate metabolism	A09100 Metabolism	6	178	163	16825	0.00780515	3.47935	[g19850.t1, g46141.t1, g33261.t1, g46151.t1, g39520.t1, g46119.t1]	0.0308954
01002 Peptidases and inhibitors	A09180 Brite Hierarchies	12	178	528	16825	0.0105595	2.14824	[g130.t1, g30083.t1, g22735.t1, g35800.t1, g29570.t3, g44883.t1, g14266.t1, g23032.t2, g40698.t1, g21158.t1, g4203.t2, g31352.t1]	0.0401263
03110 Chaperones and folding catalysts	A09180 Brite Hierarchies	12	178	546	16825	0.0134762	2.07742	[g45575.t1, g33223.t1, g31698.t1, g12630.t1, g11256.t1, g23145.t1, g1077.t1, g32726.t1, g1222.t1, g29570.t3, g16353.t1, g5619.t1]	0.0492399
04141 Protein processing in endoplasmic reticulum	A09120 Genetic Information Processing	14	178	702	16825	0.0172148	1.88506	[g45575.t1, g31698.t1, g12630.t1, g32726.t1, g6513.t1, g5619.t1, g28829.t1, g33223.t1, g11043.t1, g11256.t1, g23145.t1, g1077.t1, g1222.t1, g16353.t1]	0.0605706
00710 Carbon fixation in photosynthetic organisms	A09100 Metabolism	5	178	161	16825	0.0283536	2.93548	[g19850.t1, g46141.t1, g46151.t1, g39520.t1, g46119.t1]	0.0961996
A09190 Not Included in Pathway or Brite	A09190 Not Included in Pathway or Brite	14	178	788	16825	0.0403973	1.67933	[g31544.t1, g42395.t1, g41815.t1, g46036.t1, g32032.t1, g39566.t1, g40418.t1, g27033.t1, g21151.t1, g38386.t1, g46090.t1, g35619.t1, g26744.t1, g23979.t1]	0.132336
02042 Bacterial toxins	A09180 Brite Hierarchies	1	178	5	16825	0.051796	18.9045	[g35888.t1]	0.164021
04626 Plant-pathogen interaction	A09150 Organismal Systems	8	178	394	16825	0.0585463	1.91924	[g130.t1, g42383.t1, g2306.t1, g23950.t1, g27577.t1, g21609.t2, g28871.t1, g7134.t1]	0.179416
00561 Glycerolipid metabolism	A09100 Metabolism	4	178	138	16825	0.0589682	2.73978	[g34733.t1, g655.t1, g22326.t1, g2717.t1]	0.175062
00966 Glucosinolate biosynthesis	A09100 Metabolism	2	178	38	16825	0.0610477	4.97487	[g24722.t1, g33882.t1]	0.175743
00600 Sphingolipid metabolism	A09100 Metabolism	2	178	43	16825	0.0758056	4.39639	[g4219.t1, g34733.t1]	0.21181
00290 Valine, leucine and isoleucine biosynthesis	A09100 Metabolism	2	178	46	16825	0.0851463	4.10967	[g24722.t1, g33882.t1]	0.231111
00564 Glycerophospholipid metabolism	A09100 Metabolism	4	178	175	16825	0.115082	2.16051	[g35888.t1, g655.t1, g22326.t1, g40565.t1]	0.303689
A09150 Organismal Systems	A09150 Organismal Systems	8	178	483	16825	0.140967	1.56559	[g130.t1, g42383.t1, g2306.t1, g23950.t1, g27577.t1, g21609.t2, g28871.t1, g7134.t1]	0.361944
B 09159 Environmental adaptation	A09150 Organismal Systems	8	178	483	16825	0.140967	1.56559	[g130.t1, g42383.t1, g2306.t1, g23950.t1, g27577.t1, g21609.t2, g28871.t1, g7134.t1]	0.361944
00603 Glycosphingolipid biosynthesis - globo and isoglobo series	A09100 Metabolism	1	178	19	16825	0.18306	4.97487	[g34733.t1]	0.445916
00130 Ubiquinone and other terpenoid-quinone biosynthesis	A09100 Metabolism	2	178	74	16825	0.184469	2.55466	[g44728.t1, g35938.t1]	0.438113
00770 Pantothenate and CoA biosynthesis	A09100 Metabolism	2	178	74	16825	0.184469	2.55466	[g24722.t1, g33882.t1]	0.438113
04091 Lectins	A09180 Brite Hierarchies	1	178	21	16825	0.200274	4.50107	[g32726.t1]	0.453001
04030 G protein-coupled receptors	A09180 Brite Hierarchies	1	178	22	16825	0.208746	4.29648	[g15368.t1]	0.461182
01007 Amino acid related enzymes	A09180 Brite Hierarchies	3	178	156	16825	0.228811	1.81774	[g4219.t1, g24722.t1, g33882.t1]	0.494023
00536 Glycosaminoglycan binding proteins	A09180 Brite Hierarchies	1	178	25	16825	0.233628	3.7809	[g29570.t3]	0.493214
03020 RNA polymerase	A09120 Genetic Information Processing	2	178	94	16825	0.262176	2.01112	[g36787.t1, g15212.t1]	0.54145
99980 Enzymes with EC numbers	A09190 Not Included in Pathway or Brite	7	178	495	16825	0.270791	1.33668	[g21151.t1, g31544.t1, g38386.t1, g41815.t1, g39566.t1, g40418.t1, g27033.t1]	0.547344
00280 Valine, leucine and isoleucine degradation	A09100 Metabolism	2	178	99	16825	0.28179	1.90954	[g24722.t1, g33882.t1]	0.557709
00537 Glycosylphosphatidylinositol (GPI)-anchored proteins	A09180 Brite Hierarchies	1	178	34	16825	0.303701	2.78007	[g30076.t1]	0.588808
00053 Ascorbate and aldarate metabolism	A09100 Metabolism	2	178	114	16825	0.340197	1.65829	[g43564.t1, g7386.t1]	0.646375
00565 Ether lipid metabolism	A09100 Metabolism	1	178	41	16825	0.353765	2.30543	[g35888.t1]	0.658974
00909 Sesquiterpenoid and triterpenoid biosynthesis	A09100 Metabolism	1	178	44	16825	0.37411	2.14824	[g45163.t1]	0.683469
04016 MAPK signaling pathway - plant	A09130 Environmental Information Processing	4	178	315	16825	0.427899	1.20029	[g10574.t1, g5319.t1, g21609.t2, g31745.t1]	0.766989
00513 Various types of N-glycan biosynthesis	A09100 Metabolism	1	178	53	16825	0.4314	1.78344	[g11043.t1]	0.758944
01004 Lipid biosynthesis proteins	A09180 Brite Hierarchies	2	178	156	16825	0.493241	1.21183	[g655.t1, g22326.t1]	0.851961
B 09106 Metabolism of other amino acids	A09100 Metabolism	4	178	347	16825	0.501997	1.0896	[g1650.t1, g26300.t1, g30036.t1, g44920.t1]	0.851601
00510 N-Glycan biosynthesis	A09100 Metabolism	1	178	68	16825	0.515525	1.39004	[g11043.t1]	0.859209
04147 Exosome	A09180 Brite Hierarchies	12	178	1135	16825	0.543921	0.999357	[g45575.t1, g30083.t1, g31698.t1, g12630.t1, g11256.t1, g23145.t1, g29570.t3, g12405.t1, g44883.t1, g16353.t1, g40698.t1, g5619.t1]	0.890905
00071 Fatty acid degradation	A09100 Metabolism	1	178	74	16825	0.545599	1.27733	[g23099.t1]	0.878507
B 09123 Folding, sorting and degradation	A09120 Genetic Information Processing	15	178	1427	16825	0.5498	0.993579	[g45575.t1, g31698.t1, g12630.t1, g32726.t1, g6513.t1, g5619.t1, g28829.t1, g33223.t1, g44889.t2, g11043.t1, g11256.t1, g23145.t1, g1077.t1, g1222.t1, g16353.t1]	0.870516
00350 Tyrosine metabolism	A09100 Metabolism	1	178	75	16825	0.550427	1.2603	[g23099.t1]	0.857223
B 09107 Glycan biosynthesis and metabolism	A09100 Metabolism	2	178	187	16825	0.591018	1.01094	[g11043.t1, g34733.t1]	0.905592
00052 Galactose metabolism	A09100 Metabolism	1	178	85	16825	0.595993	1.11203	[g34733.t1]	0.89872
00860 Porphyrin and chlorophyll metabolism	A09100 Metabolism	1	178	89	16825	0.612906	1.06205	[g37983.t1]	0.909783
B 09108 Metabolism of cofactors and vitamins	A09100 Metabolism	5	178	503	16825	0.618415	0.939587	[g24722.t1, g44728.t1, g35938.t1, g37983.t1, g33882.t1]	0.903838
00270 Cysteine and methionine metabolism	A09100 Metabolism	2	178	212	16825	0.659195	0.891721	[g24722.t1, g33882.t1]	0.948842
03016 Transfer RNA biogenesis	A09180 Brite Hierarchies	3	178	337	16825	0.695394	0.841446	[g46030.t1, g46147.t1, g46104.t1]	0.986007
00562 Inositol phosphate metabolism	A09100 Metabolism	1	178	122	16825	0.728091	0.774774	[g35888.t1]	1.01719
01003 Glycosyltransferases	A09180 Brite Hierarchies	3	178	400	16825	0.798946	0.708919	[g11043.t1, g12885.t1, g14532.t1]	1.1
04145 Phagosome	A09140 Cellular Processes	1	178	170	16825	0.837534	0.556015	[g32726.t1]	1.13665
00620 Pyruvate metabolism	A09100 Metabolism	1	178	192	16825	0.871757	0.492305	[g23099.t1]	1.16644
03018 RNA degradation	A09120 Genetic Information Processing	1	178	210	16825	0.894347	0.450107	[g44889.t2]	1.18004
03000 Transcription factors	A09180 Brite Hierarchies	6	178	857	16825	0.895716	0.661768	[g6800.t1, g39000.t2, g5050.t1, g13430.t2, g21609.t2, g44634.t1]	1.16566
00010 Glycolysis / Gluconeogenesis	A09100 Metabolism	1	178	239	16825	0.922712	0.395492	[g23099.t1]	1.18456
00520 Amino sugar and nucleotide sugar metabolism	A09100 Metabolism	1	178	242	16825	0.925174	0.390589	[g7386.t1]	1.17189
04075 Plant hormone signal transduction	A09130 Environmental Information Processing	3	178	542	16825	0.929292	0.523187	[g60.t1, g5319.t1, g31745.t1]	1.16162
B 09132 Signal transduction	A09130 Environmental Information Processing	5	178	831	16825	0.942991	0.568727	[g10574.t1, g60.t1, g5319.t1, g21609.t2, g31745.t1]	1.16343
03021 Transcription machinery	A09180 Brite Hierarchies	2	178	430	16825	0.944378	0.439639	[g36787.t1, g15212.t1]	1.1502
A09130 Environmental Information Processing	A09130 Environmental Information Processing	5	178	856	16825	0.951935	0.552117	[g10574.t1, g60.t1, g5319.t1, g21609.t2, g31745.t1]	1.14473
03400 DNA repair and recombination proteins	A09180 Brite Hierarchies	2	178	484	16825	0.965892	0.390589	[g36787.t1, g15212.t1]	1.147
B 09109 Metabolism of terpenoids and polyketides	A09100 Metabolism	1	178	338	16825	0.973526	0.279652	[g45163.t1]	1.14179
03010 Ribosome	A09120 Genetic Information Processing	3	178	672	16825	0.975333	0.421975	[g35373.t1, g35906.t1, g35869.t1]	1.12996
B 09121 Transcription	A09120 Genetic Information Processing	2	178	532	16825	0.978115	0.355348	[g36787.t1, g15212.t1]	1.11953
03011 Ribosome	A09180 Brite Hierarchies	3	178	709	16825	0.981958	0.399954	[g35373.t1, g35906.t1, g35869.t1]	1.11055
04131 Membrane trafficking	A09180 Brite Hierarchies	11	178	1793	16825	0.986163	0.579892	[g45575.t1, g33223.t1, g31698.t1, g12630.t1, g11256.t1, g23145.t1, g1077.t1, g32726.t1, g27357.t1, g16353.t1, g5619.t1]	1.10218
01001 Protein kinases	A09180 Brite Hierarchies	3	178	796	16825	0.991517	0.35624	[g29776.t1, g30878.t1, g42569.t1]	1.09528
B 09105 Amino acid metabolism	A09100 Metabolism	3	178	796	16825	0.991517	0.35624	[g23099.t1, g24722.t1, g33882.t1]	1.09528
A09120 Genetic Information Processing	A09120 Genetic Information Processing	20	178	3320	16825	0.999174	0.569412	[g45575.t1, g36787.t1, g31698.t1, g12630.t1, g35906.t1, g32726.t1, g6513.t1, g35869.t1, g15212.t1, g5619.t1, g35373.t1, g28829.t1, g33223.t1, g44889.t2, g11043.t1, g11256.t1, g23145.t1, g1077.t1, g1222.t1, g16353.t1]	1.07865
A09140 Cellular Processes	A09140 Cellular Processes	1	178	744	16825	0.999695	0.127046	[g32726.t1]	1.06709
B 09141 Transport and catabolism	A09140 Cellular Processes	1	178	744	16825	0.999695	0.127046	[g32726.t1]	1.06709
03019 Messenger RNA biogenesis	A09180 Brite Hierarchies	1	178	875	16825	0.999929	0.108026	[g44889.t2]	1.04388
B 09122 Translation	A09120 Genetic Information Processing	3	178	1317	16825	0.999939	0.215313	[g35373.t1, g35906.t1, g35869.t1]	1.03255
A09180 Brite Hierarchies	A09180 Brite Hierarchies	107	178	12635	16825	0.999997	0.800467	[g46030.t1, g24722.t1, g12885.t1, g46147.t1, g40698.t1, g21158.t1, g46104.t1, g7459.t1, g30076.t1, g826.t1, g130.t1, g22735.t1, g22326.t1, g40359.t1, g35938.t1, g35888.t1, g44889.t2, g11256.t1, g1222.t1, g655.t1, g9389.t1, g16353.t1, g45163.t1, g46150.t1, g45467.t1, g30083.t1, g44497.t1, g39000.t2, g5050.t1, g15368.t1, g14266.t1, g21609.t2, g44728.t1, g5619.t1, g44634.t1, g19851.t1, g3047.t1, g68…	1.0215
04121 Ubiquitin system	A09180 Brite Hierarchies	1	178	1237	16825	0.999999	0.0764127	[g42580.t1]	1.01064
B 09182 Protein families: genetic information processing	A09180 Brite Hierarchies	29	178	8977	16825	1	0.305353	[g36787.t1, g39000.t2, g46030.t1, g5050.t1, g35906.t1, g32726.t1, g46147.t1, g21609.t2, g5619.t1, g44634.t1, g46104.t1, g6800.t1, g23145.t1, g29570.t3, g42580.t1, g45575.t1, g31698.t1, g12630.t1, g13430.t2, g27357.t1, g35869.t1, g15212.t1, g35373.t1, g33223.t1, g44889.t2, g11256.t1, g1077.t1, g1222.t1, g16353.t1]	1
