# Supplementary material
Source: Research Square preprint supplement (doi:10.21203/rs.3.rs-9029043/v1)
Supplement: Supplementary file 4 [file 8b5d061c2e5146ce08688c2f.xlsx]

## Sheet: Sheet1
Table S1. Primers used for qRT-PCR analysis
Primer	Sequence (5’→3’)
g11405.t1_F	CAC ATG CTG CTG CTG ATA CAC
g11405.t1_R	ACT CCG ATT TTT CGC CCC TG
g11759.t1_F	GTT TTC ACT GAG GCT GTT TCC
g11759.t1_R	GCA TAC CCA CAG TTG ATC TTC C
g39000.t2_F	GGC TGT GGT GGA CGC TTC TT
g39000.t2_R	CAG AAC CTG CTG CCA GTC GT
g45715.t1_F	CCC AAG GGA AAG GGT GTT TA
g45715.t1_R	GGT GCC TCC AAC ATA GAC AT
g33357.t1_F	GCG GTC ACA GCG CGT TAC TTA
g33357.t1_R	GCC CAA ACT AAA CGT CGC AAT CC
g18298.t1_F	ATG CCA AGT CAT GTC TCC AGT
g18298.t1_R	GAT CCA TCA GCG CGG AAA AG
L23_F	AAG GAT GCC GTG AAG AAG ATG
L23_R	GCA TCG TAG TCA GGA GTC AAC C
F-BOX_F	GGC ACT CAC AAA CGT CTA TTT C
F-BOX_R	ACC TGG GAG GCA TCC TGC TTA T
