# Supplementary material
Source: Research Square preprint supplement (doi:10.21203/rs.3.rs-9029043/v1)
Supplement: Supplementary file 6 [file ad7c618544c8c5e193ac2633.xlsx]

## Sheet: Table S1
Table S2. Raw gene counts per treatment in Nicotiana benthamiana
gene_id	MT-1	MT-2	MT-3	JS-1	JS-2	JS-3	Mock-1	Mock-2	Mock-3
g3.t1	160	137	180	194	131	164	42	58	71
g4.t1	1505	1461	1738	1522	1613	1618	1137	1294	1475
g6.t1	1551	1669	1629	1676	1737	1785	981	1326	1092
g5.t1	17096	15675	17334	15846	15294	15411	7627	8915	13219
g7.t1	1169	1281	1244	1389	1212	1305	710	818	1060
g10.t2	625	693	657	813	781	862	284	367	357
g11.t1	953	889	893	990	1058	1054	539	693	664
g13.t1	102	96	114	117	122	108	158	180	176
g14.t1	124	116	105	194	149	176	52	63	163
g12.t1	1505	1463	1635	1739	1650	1968	956	1184	950
g15.t1	2209	2540	2494	1896	1887	2127	1549	1871	1836
g16.t1	930	903	1028	1083	1147	898	1037	1188	1087
g17.t1	7740	8260	7787	6548	6528	7352	5290	6592	7115
g20.t1	2435	3011	2684	2462	2305	2410	1683	1901	3175
g23.t1	51	40	12	115	33	0	0	24	0
g24.t1	54	41	107	12	42	75	31	26	57
g25.t1	194	157	99	62	88	92	84	126	97
g26.t1	561	570	672	573	594	615	290	390	607
g27.t1	567	609	577	490	632	705	1068	1330	1117
g28.t1	360	403	366	380	349	545	799	991	609
g31.t1	95	63	67	267	286	185	28	24	45
g29.t1	225	229	188	198	232	262	260	360	455
g33.t1	514	531	581	694	652	725	834	1195	952
g35.t1	33	47	19	28	35	20	25	11	30
g34.t1	1226	1292	1270	1311	1257	1266	440	573	750
g21.t1	279	272	282	278	305	365	343	318	336
g22.t1	38844	42492	40257	38748	39047	41750	24059	27896	30546
g39.t1	309	318	263	351	311	357	260	306	165
g40.t1	257	242	260	216	230	284	90	164	178
g43.t1	79	81	70	111	114	129	41	27	34
g42.t1	11625	11909	11806	11898	11961	11796	6349	7662	8819
g44.t1	3691	4155	3716	3994	3731	3873	3183	3770	3671
g45.t1	456	428	500	542	502	558	197	294	341
g46.t1	251	140	309	272	341	323	629	771	252
g47.t1	937	1258	1002	966	1060	1087	482	429	333
g48.t1	372	415	419	325	334	386	542	725	631
g49.t1	336	230	261	312	297	413	357	419	593
g49.t2	111	103	137	102	83	38	176	126	0
g58.t1	131	108	143	83	62	104	307	392	290
g56.t1	305	302	385	452	473	366	158	157	233
g57.t1	56	69	87	99	130	111	25	40	45
g54.t1	4583	4361	4930	5501	5216	5832	8482	10255	6380
g59.t1	402	362	379	456	473	483	567	594	1035
g60.t1	137	143	135	175	182	162	516	575	203
g64.t1	30	30	13	32	32	31	18	10	9
g65.t1	66	62	66	72	94	59	27	27	34
g66.t1	317	253	301	333	326	348	423	531	330
g62.t1	6373	5838	6525	6629	6627	6820	2848	3179	3175
g67.t1	2507	2324	2756	2353	2310	2350	1588	1751	1634
g68.t1	231	312	288	296	343	248	337	297	577
g68.t2	58	0	0	37	0	24	0	38	0
g71.t1	46207	51691	48632	48171	50248	52119	18943	23691	22660
g72.t2	0	18	0	0	0	21	171	140	0
g72.t3	195	356	290	225	370	357	402	623	551
g72.t1	114	0	0	124	0	0	266	260	292
g73.t1	669	644	644	699	655	646	383	489	671
g74.t1	384	439	338	425	484	477	206	223	375
g76.t1	121	101	117	145	92	185	92	64	48
g77.t1	358	455	477	460	512	570	816	873	559
g78.t1	958	1037	1129	1793	1581	1473	1298	1416	1825
g75.t1	11493	12008	11942	10715	10475	11163	8391	9677	18569
g80.t1	2934	3456	3481	3441	3288	3594	1412	1774	1936
g82.t1	3480	3685	3624	3786	3616	3870	1549	2032	3599
g83.t1	1836	2075	1861	1966	2077	2013	980	1161	866
g84.t1	14	14	16	18	14	36	9	9	27
g85.t1	6	0	0	6	0	7	0	4	5
g89.t1	184	243	219	141	136	141	82	111	169
g91.t1	23	24	11	50	35	54	10	14	14
g92.t1	14	22	5	29	31	8	5	0	13
g90.t1	106	125	88	150	164	164	72	83	136
g96.t1	5	0	0	14	16	9	0	0	0
g97.t1	39	45	49	82	33	48	34	37	93
g98.t1	1392	1527	1579	1251	1258	1351	899	1114	865
g99.t1	2345	2406	2360	2497	2648	2648	1107	1362	3328
g100.t1	2094	2178	2150	1914	1764	2011	1210	1489	882
g103.t2	408	316	414	425	357	397	225	258	429
g103.t1	148	258	311	197	256	203	63	106	92
g104.t1	120	165	87	149	144	174	170	148	244
g101.t1	5303	5185	5674	4944	4921	5125	3377	3864	5258
g105.t1	3240	3728	3349	3343	3393	3423	2137	2475	2004
g107.t1	2296	2345	2297	2757	2637	2501	2212	2696	4213
g108.t1	423	445	359	482	475	417	175	124	287
g109.t1	1541	1454	1598	1561	1484	1502	838	982	1795
g109.t2	95	172	76	103	129	87	0	84	146
g106.t1	68908	73490	72938	59280	59199	62672	39760	46307	78717
g112.t1	31	46	52	14	37	62	18	23	21
g113.t1	113	99	122	119	110	118	55	81	67
g111.t1	1621	1763	1626	1733	1692	1646	1074	1160	1230
g116.t1	19	40	49	23	0	34	17	26	21
g115.t1	263	247	234	278	306	316	254	245	320
g117.t1	3208	3628	3278	2636	2711	2959	1673	1880	2383
g118.t1	804	762	765	709	687	815	403	431	520
g114.t1	47802	48206	48537	42283	43281	44780	36150	42800	164093
g120.t1	0	0	0	0	0	0	0	0	0
g119.t1	8041	8284	8334	9472	9695	9620	3089	3715	7204
g121.t1	1299	1397	1435	1458	1506	1622	636	690	648
g122.t1	1348	1460	1657	1499	1507	1572	1130	1387	1287
g123.t1	716	562	713	686	799	704	654	636	532
g125.t1	698	749	685	619	729	818	605	727	362
g126.t1	459	518	412	480	409	436	153	162	159
g128.t1	507	542	560	332	434	434	601	651	431
g130.t1	53	22	57	68	56	79	175	195	92
g131.t1	381	327	366	420	420	555	614	847	661
g132.t1	25	32	47	60	40	71	17	29	60
g133.t1	114	108	94	131	148	172	110	105	79
g129.t1	5977	5721	5893	5687	6025	6363	8705	11343	8123
g134.t1	557	594	560	704	636	649	239	304	523
g137.t1	575	540	636	652	733	689	675	859	724
g140.t1	706	820	825	740	680	706	406	454	360
g135.t1	15971	14290	16756	16735	16236	17872	11818	13143	9011
g141.t1	1549	1552	1472	1510	1433	1511	977	1217	818
g143.t1	2821	2912	2793	2886	2846	3216	1638	1810	1402
g144.t1	1166	1404	1174	1195	1161	1222	761	871	955
g145.t1	1106	1004	990	1154	1130	1333	632	768	852
g148.t1	2016	1870	2028	2007	1678	1767	1451	1811	1645
g149.t1	826	1184	768	896	948	1037	950	866	705
g151.t1	83	73	56	90	49	71	61	63	102
g152.t1	1492	1600	1517	1481	1418	1735	1374	1572	1436
g153.t1	3203	3095	3410	4898	4519	4563	2469	3322	2224
g155.t1	198	284	257	279	347	359	362	485	404
g156.t1	68	87	66	38	55	32	51	48	31
g154.t1	2480	2673	2542	2813	2830	2873	1497	1661	1561
g158.t1	243	256	233	219	238	249	205	329	167
g162.t1	19	30	14	16	12	15	0	0	0
g164.t1	98	119	113	91	121	133	68	65	89
g165.t1	69	74	83	113	121	98	60	71	46
g161.t1	2262	2433	2271	1959	1983	1773	1120	1214	1078
g166.t1	642	641	719	616	563	567	838	963	1146
g169.t1	60	77	66	100	130	108	54	56	89
g168.t1	1484	1424	1409	1639	1526	1698	529	586	559
g171.t1	140	111	120	202	207	167	85	122	125
g170.t1	2473	2604	2585	2785	2622	3132	1789	2196	1881
g174.t1	896	1089	1004	919	919	1016	611	828	607
g176.t1	0	0	0	0	0	0	0	0	0
g176.t2	1233	1486	1342	1620	1678	1731	618	522	515
g178.t1	29	43	30	37	46	26	13	14	33
g177.t1	3217	3292	3443	3282	3184	3553	2503	3228	2175
g179.t1	988	1110	1068	1032	871	1069	595	681	634
g180.t1	2173	2199	2179	2174	2097	2077	933	1172	1274
g182.t1	29	30	39	16	27	25	27	26	48
g183.t1	14	18	15	14	30	50	34	45	30
g181.t1	3937	4847	4544	5021	5030	5819	6928	7193	4492
g184.t1	1155	1118	1265	962	867	992	2542	3241	2992
g188.t1	176	75	128	110	95	123	106	81	129
g186.t1	1106	1188	1314	1096	1125	1176	763	860	1536
g189.t1	397	305	424	488	515	425	189	218	258
g190.t1	708	692	761	841	927	1016	1436	1671	1176
g194.t1	114	128	167	133	165	170	199	172	223
g193.t1	3668	3960	3912	2794	2803	2943	1615	2041	2202
g195.t1	2241	2429	2125	2259	1999	2320	1617	2141	1594
g197.t1	831	824	819	786	640	780	473	466	539
g196.t1	1912	1932	1891	2000	1931	1893	1195	1425	1032
g198.t1	99	91	71	69	79	64	20	25	42
g201.t1	108	92	121	125	130	172	43	79	108
g202.t1	332	314	395	375	341	322	225	288	241
g199.t1	9604	10011	10218	9892	10024	10726	4581	5670	3906
g203.t1	2806	3411	2752	1953	2159	2310	1243	1487	1278
g204.t1	80	82	101	93	68	123	27	37	21
g205.t1	212	225	313	313	351	330	115	142	360
g206.t1	869	788	861	1040	1072	954	402	459	884
g207.t1	399	253	301	364	395	398	181	196	433
g208.t1	2784	3194	2968	3901	3727	4018	3087	3167	2942
g209.t1	826	808	912	880	831	847	642	834	601
g211.t1	642	755	723	634	625	681	410	606	438
g213.t1	248	246	300	368	375	415	94	151	96
g215.t1	5941	5851	5707	6803	7001	6845	3020	3803	4167
g216.t1	2407	3544	2605	2458	3101	2455	1161	1225	709
g220.t1	46	47	41	25	28	36	55	103	124
g219.t1	171	172	146	227	165	166	118	125	130
g217.t1	10713	13303	12445	11703	11219	10571	5156	4363	6495
g222.t1	523	399	526	670	562	624	756	906	875
g221.t1	19518	23070	20344	18469	18866	20002	12037	13799	25086
g225.t1	294	310	265	286	258	299	261	347	237
g226.t1	126	156	154	222	203	221	101	97	143
g227.t1	244	261	224	196	196	200	37	77	128
g223.t1	28406	32020	29586	33102	32786	34602	9171	10215	8373
g229.t1	1504	1622	1475	1338	1571	1501	1063	1126	954
g230.t1	1746	1820	1490	1603	1686	1727	1451	1815	1305
g231.t1	3046	3154	3259	3364	3437	3676	1855	2140	1877
g232.t1	537	566	615	610	699	630	250	308	356
g236.t1	20	34	36	31	13	33	8	9	38
g235.t1	0	0	26	98	151	149	0	0	0
g235.t2	68	55	64	507	371	522	76	85	68
g234.t1	1048	1163	958	1084	1245	1213	476	594	478
g237.t1	641	640	605	555	553	610	240	403	284
g240.t1	95	118	89	112	125	158	57	49	105
g239.t1	1069	1017	1183	1052	1021	1176	809	971	796
g241.t1	107	129	168	174	133	99	171	239	140
g242.t1	254	255	266	312	330	282	156	141	241
g243.t1	56	41	66	70	41	77	18	30	22
g244.t1	70	86	103	99	111	85	24	33	93
g245.t1	1332	1209	1476	1653	1498	1627	1302	1472	1344
g247.t1	211	142	196	192	211	217	156	184	226
g249.t1	29	0	0	31	21	28	57	96	42
g248.t1	364	323	373	307	297	353	165	223	167
g251.t1	59	114	116	134	101	180	42	44	36
g250.t1	955	975	1032	1004	1048	1077	538	674	552
g246.t1	15024	15474	15446	18638	19104	19333	6773	8124	21355
g252.t1	240	307	279	268	256	302	147	167	321
g254.t1	417	395	376	382	332	352	193	269	531
g256.t1	938	986	856	818	834	863	375	489	429
g257.t1	1553	1596	1522	1581	1405	1612	492	546	845
g260.t1	21	0	0	0	0	0	20	22	0
g261.t1	187	178	185	224	224	278	236	334	301
g258.t1	7579	7857	7897	6323	6047	6690	6343	7801	5578
g263.t1	1947	2203	2011	768	708	820	1009	904	1564
g264.t1	2739	2554	2624	2026	2167	1974	1984	2480	2771
g265.t1	1234	1173	1326	1090	1184	1190	656	811	1302
g265.t2	38	105	43	57	77	46	28	63	125
g266.t2	305	280	282	329	355	277	317	311	300
g268.t1	348	472	368	388	408	406	258	366	317
g269.t1	1138	1105	1084	968	899	1010	674	806	431
g271.t1	21	16	35	30	35	38	11	17	13
g270.t1	1005	1000	1004	990	1181	1087	634	768	532
g274.t1	789	882	914	1078	889	1040	446	478	516
g276.t1	150	225	127	184	120	149	189	180	387
g278.t1	52	42	43	44	55	55	35	33	26
g272.t1	5092	5077	4906	5486	5445	5839	2414	2739	2988
g273.t1	471	548	440	298	334	340	300	353	480
g279.t1	56	37	40	42	38	33	83	112	60
g281.t1	0	0	0	0	0	0	0	0	0
g280.t1	428	416	415	368	358	440	183	170	187
g283.t1	417	414	293	433	425	537	175	217	176
g284.t1	1981	1830	1968	2193	2311	2339	709	842	910
g285.t1	1231	1344	1328	1243	1366	1397	837	923	1150
g287.t1	625	575	680	651	611	685	210	344	391
g288.t1	47	69	62	77	57	52	64	61	138
g289.t1	3328	4056	3770	2087	2211	2466	2664	3398	4926
g290.t1	1177	1047	1208	1386	1372	1312	742	881	963
g291.t1	234	270	235	244	300	248	33	64	126
g294.t1	459	473	382	512	599	633	473	600	858
g295.t1	245	224	191	138	202	164	142	136	102
g296.t1	0	900	1231	1175	1247	1193	1236	1475	1309
g296.t2	2208	1326	1326	1416	1373	1626	1501	1689	2048
g298.t1	1731	1722	1761	1752	1728	1745	1012	1131	1108
g299.t1	89	73	60	50	64	41	20	45	46
g297.t1	34981	35556	35962	36647	36952	37643	22187	25620	72505
g303.t1	62	33	51	48	18	30	72	82	50
g304.t1	151	173	153	204	238	200	57	74	54
g305.t1	32	42	52	27	0	0	0	19	27
g300.t1	5593	5469	5969	5740	5482	6336	4046	5118	3729
g307.t1	186	437	273	132	144	182	453	267	105
g309.t2	0	26	0	0	0	0	0	0	0
g309.t1	68	67	118	165	131	110	138	191	125
g309.t3	39	0	26	44	26	28	90	71	37
g310.t1	163	140	143	150	139	152	321	322	123
g306.t1	8037	7753	8124	7383	7253	7128	4358	5021	5955
g313.t1	352	305	345	384	448	540	819	841	382
g311.t1	7810	9373	8556	7268	7656	7610	4652	5906	7063
g315.t1	77	98	81	92	117	115	132	135	105
g314.t1	1893	2042	1944	1610	1691	1840	1460	1822	1243
g316.t1	199	148	183	173	146	150	76	112	232
g317.t1	211	205	193	210	243	223	259	268	285
g318.t1	1923	2158	1974	2082	2079	2330	811	1028	506
g320.t1	87	98	68	525	581	602	123	174	99
g319.t1	2180	1917	2157	2022	2005	1947	1243	1430	1326
g325.t1	0	0	0	0	0	0	0	0	0
g322.t1	2405	2691	2759	2855	2634	2904	1548	1880	1736
g324.t1	318	271	314	389	409	365	198	199	134
g326.t1	288	296	316	225	238	229	109	154	451
g327.t1	202	192	192	270	246	206	49	37	54
g328.t1	885	762	869	803	818	878	426	485	862
g329.t1	583	627	648	597	639	639	326	364	393
g330.t1	1816	1772	1822	2079	1970	2107	1022	1208	1117
g332.t1	33	85	79	97	100	103	141	167	131
g331.t1	9223	10000	9278	9805	9440	10298	5454	5915	16460
g333.t1	1376	1332	1420	1407	1528	1378	776	908	854
g334.t1	684	616	600	494	585	525	766	871	928
g336.t1	1879	2246	1908	1662	1753	1803	1349	1543	1398
g338.t1	14	35	28	33	12	12	7	0	9
g339.t1	39	26	41	53	43	46	19	0	20
g341.t1	51	81	96	77	66	73	89	95	49
g340.t1	580	580	622	683	748	702	1131	1249	939
g342.t1	221	213	267	269	205	310	132	115	128
g337.t1	10329	10249	10519	10959	10882	10632	7296	8758	9133
g344.t1	391	353	288	319	234	401	228	208	205
g345.t1	2197	2263	2105	1126	1216	1327	1088	1324	2863
g346.t1	855	863	863	805	721	878	697	877	1076
g347.t1	4407	4560	4800	4065	3659	3975	1759	2123	3749
g348.t1	550	679	676	444	471	604	421	439	459
g349.t1	550	494	521	468	563	528	314	385	337
g351.t1	1037	821	1142	1210	1246	1224	2020	2355	1563
g352.t1	2065	2326	2274	1848	2004	2115	1030	1160	1142
g353.t1	617	621	580	567	582	700	324	387	364
g354.t1	1579	1443	1525	1788	1614	1422	598	738	850
g355.t1	1634	1874	1699	1734	1807	1749	1065	1510	1249
g356.t1	429	466	446	526	464	438	207	283	300
g359.t1	0	407	115	93	30	352	0	0	30
g359.t2	567	208	467	577	648	325	336	340	534
g361.t1	118	200	188	217	166	214	55	51	45
g363.t1	22	26	38	25	16	26	25	27	40
g364.t1	106	143	153	136	142	153	56	100	100
g366.t1	2061	2257	2053	2421	2390	2562	1127	1402	1433
g367.t1	747	724	753	909	714	798	463	474	313
g368.t1	2421	2514	2545	2361	2621	2639	1183	1292	1249
g372.t1	1024	992	1028	1146	1138	1201	695	788	755
g373.t1	1457	1575	1791	1711	1547	1563	820	1065	1868
g374.t1	470	633	619	439	456	494	520	631	479
g376.t1	214	287	274	400	366	420	174	192	172
g375.t1	3122	3323	3194	2984	2822	3044	1848	2054	2395
g377.t1	1288	1542	1229	1375	1403	1369	663	879	899
g379.t1	435	614	660	751	688	729	220	326	219
g380.t1	1512	1877	1816	1803	1817	1661	907	893	830
g381.t1	209	225	205	190	211	246	143	154	207
g382.t1	1460	1433	1507	1471	1304	1400	828	1036	738
g383.t1	769	910	885	908	875	843	544	612	645
g378.t1	32999	34844	34497	33355	34143	35760	25317	29357	20650
g384.t1	2402	2652	2245	2294	2286	2539	1633	1632	1509
g385.t1	406	403	349	380	396	409	238	446	306
g387.t1	269	204	255	240	218	254	202	193	210
g386.t1	2168	2173	2091	2643	2688	2982	1158	1200	1614
g388.t1	4532	5068	4558	5458	5324	5546	1720	2328	2837
g390.t1	221	232	265	266	230	221	397	466	376
g391.t1	4130	3809	3915	3915	3730	3999	1958	2263	2092
g396.t1	5224	4892	5251	4420	4385	5069	5186	6336	10445
g397.t1	1144	959	1151	1108	1011	1025	686	770	974
g401.t1	33	40	67	74	58	70	29	35	67
g399.t1	1678	1637	1606	1651	1654	1719	777	1038	1043
g402.t1	645	803	814	289	309	265	110	138	81
g403.t1	1737	1772	1840	1646	1635	1838	744	1002	1059
g405.t2	1191	1617	1909	1459	1422	1566	964	1158	1287
g405.t1	692	59	91	0	37	0	0	0	31
g406.t1	832	820	886	852	923	951	325	467	554
g407.t1	225	211	166	183	193	274	124	152	133
g408.t1	16	0	0	10	17	12	12	14	0
g409.t2	8154	6972	6742	8522	6392	7420	6890	6346	6551
g409.t1	1911	3005	3636	1506	3310	2448	763	2817	769
g410.t1	2115	2036	2127	2037	2081	2003	1353	1436	2483
g411.t1	346	421	364	391	444	371	189	201	302
g412.t1	239	246	232	239	249	208	111	138	278
g414.t1	1849	1872	1952	2309	2186	2355	1129	1306	1521
g417.t1	0	0	0	0	0	0	0	0	0
g416.t1	4572	4521	4579	4420	3953	3712	3018	3083	3168
g416.t2	1710	2132	2301	1472	1649	2287	1087	1640	1149
g419.t1	799	704	828	821	881	1012	1057	1264	1545
g420.t1	357	472	477	334	433	409	995	1110	915
g421.t1	455	420	453	439	425	364	260	335	194
g423.t1	1078	1110	1100	1144	1131	1191	627	786	698
g422.t1	8108	8277	8300	5498	5932	6253	3041	3886	2187
g424.t1	1063	1189	1149	991	1136	1172	670	737	812
g425.t1	497	507	483	531	575	640	205	230	385
g426.t1	1684	1859	1729	1853	1643	1909	1320	1532	1553
g427.t1	172	250	209	261	180	247	52	71	98
g429.t1	689	895	662	884	823	740	420	308	618
g429.t2	171	95	179	162	338	305	0	120	174
g430.t1	690	609	628	558	532	739	409	468	726
g431.t1	72	80	82	79	77	87	158	215	124
g433.t1	155	143	142	179	141	156	82	101	133
g434.t1	2790	2782	2718	2983	2921	3214	1427	1763	2405
g435.t1	652	695	618	580	526	559	506	692	1362
g436.t1	1718	1689	1626	1618	1696	1702	857	1118	996
g438.t1	3910	4294	4249	3593	3455	3385	2417	3200	1950
g441.t1	347	416	492	420	379	393	206	244	258
g442.t1	125	149	129	146	95	137	53	58	71
g443.t2	1122	891	846	1079	1173	868	287	778	713
g443.t1	233	503	696	391	275	509	476	154	147
g444.t1	1555	1514	1541	1709	1583	1693	1011	1203	1665
g445.t1	29	25	34	32	19	32	0	12	20
g448.t1	1248	1504	1327	1068	1147	1311	1003	1196	729
g449.t1	63	25	48	27	33	38	32	0	29
g450.t1	35	15	26	25	26	23	0	0	9
g452.t1	2305	2348	2280	2175	2104	2307	1363	1534	1294
g453.t1	791	813	725	777	837	864	329	363	406
g454.t1	1040	1199	1142	1186	1112	1034	642	819	789
g455.t1	629	679	621	649	630	711	259	312	431
g456.t1	1314	1575	1480	1328	1252	1511	752	809	817
g457.t1	2169	2327	2280	2308	2075	2395	1442	1832	1242
g458.t1	9971	10329	10478	15305	15982	15977	1635	2064	1870
g460.t1	94	68	108	143	88	125	131	185	108
g459.t1	3274	3210	3105	3048	3044	3066	2066	2654	1720
g464.t1	14	0	18	24	0	0	0	0	0
g461.t1	94	102	110	147	105	136	29	63	156
g462.t1	1963	2032	1779	2012	2347	2310	959	1206	4028
g466.t1	532	572	541	687	674	726	303	353	352
g468.t1	184	228	258	235	240	185	105	104	147
g467.t1	577	698	635	493	554	520	411	427	916
g469.t1	788	1025	878	869	858	831	609	674	769
g471.t1	969	1203	1168	1152	1155	1265	665	796	716
g472.t2	291	369	345	269	314	299	193	247	281
g472.t1	120	136	114	192	173	122	70	122	28
g473.t1	2110	2231	2189	1934	1937	2005	1447	1598	1159
g474.t1	780	660	570	711	722	579	293	382	379
g475.t1	815	753	802	822	722	778	577	677	636
g478.t1	66	41	43	88	66	46	19	9	77
g476.t1	513	498	574	502	527	658	291	403	305
g480.t1	107	89	117	62	93	81	67	140	112
g482.t1	342	412	385	456	436	362	235	262	321
g483.t1	1021	976	1029	1043	1276	1308	572	657	985
g485.t1	103	102	98	75	142	90	289	313	89
g486.t1	36	0	23	38	31	52	34	30	35
g488.t1	1438	1240	1412	1410	1329	1411	824	947	1550
g489.t1	747	1209	761	947	847	1083	573	719	961
g489.t2	663	453	761	629	702	650	392	453	309
g491.t1	2403	2372	2349	2528	2397	2602	1273	1436	1481
g492.t1	824	1004	841	957	992	975	475	570	727
g495.t1	133	130	111	146	211	183	329	361	320
g494.t1	1751	1728	1859	1702	1613	1602	1139	1248	1076
g496.t1	591	608	555	634	570	602	401	342	514
g498.t2	0	28	0	0	0	0	0	0	0
g498.t1	154	116	143	140	192	206	330	325	154
g497.t1	1105	1132	1066	876	797	816	859	1159	1467
g499.t1	683	680	646	636	742	726	412	447	222
g502.t1	1743	1780	1730	1832	1852	1869	953	1040	1340
g505.t1	0	0	0	0	0	0	0	0	0
g504.t1	540	495	423	604	627	544	353	460	897
g506.t1	200	140	214	199	133	246	300	439	276
g507.t1	359	348	430	464	451	544	882	1018	529
g508.t1	674	742	785	743	791	787	433	469	496
g510.t1	251	243	291	310	308	412	214	211	210
g511.t1	480	378	472	460	433	478	327	346	283
g512.t1	121	133	111	125	148	111	72	101	244
g513.t1	126	96	110	64	124	81	63	52	82
g515.t1	30	15	14	15	17	20	6	0	0
g514.t1	554	445	532	488	487	450	206	221	310
g518.t1	564	543	603	610	647	639	376	418	348
g519.t1	2549	2501	2645	2662	2419	2597	1643	1760	1625
g520.t1	795	866	998	857	962	840	536	693	1110
g521.t1	38	48	53	52	53	85	48	34	17
g523.t1	18	0	20	11	7	7	11	0	0
g526.t1	9	28	17	29	24	20	8	0	9
g524.t1	476	523	639	512	464	473	337	433	529
g527.t1	1210	975	1208	1526	1322	1402	680	770	824
g528.t1	717	795	829	918	942	981	559	755	852
g529.t1	1031	956	905	777	882	896	2857	3622	2804
g531.t1	132	118	142	149	105	103	78	77	85
g533.t1	1524	1731	1610	1761	1779	1708	689	887	802
g535.t1	47	42	56	93	59	90	18	27	11
g534.t1	2019	2064	1987	1758	1791	1945	1176	1649	1000
g537.t1	103	113	106	193	186	215	75	93	87
g538.t1	331	277	376	411	460	467	556	607	434
g540.t1	5424	5265	5626	5549	5710	5764	3072	3432	3571
g544.t1	4457	4028	4491	4795	4725	5090	1886	1896	2315
g545.t1	956	929	1034	924	1036	1219	1441	1770	1268
g549.t1	63	60	38	76	59	119	161	190	125
g547.t1	1343	1363	1438	1182	1268	1377	875	1145	816
g553.t1	206	205	152	190	267	242	58	83	39
g555.t1	79	99	107	139	136	123	58	92	123
g554.t1	667	664	796	797	816	768	550	577	483
g557.t1	752	768	723	614	655	622	353	330	586
g556.t1	5803	6194	5900	5712	5861	6096	3588	4497	3807
g560.t3	716	741	734	747	751	619	441	502	221
g560.t2	13	0	0	38	27	0	10	9	51
g560.t1	10	9	34	9	138	161	0	20	267
g561.t1	353	333	360	416	366	408	195	248	393
g563.t1	53	83	53	69	48	78	36	42	79
g562.t1	951	939	1025	881	922	854	709	893	723
g564.t1	0	0	0	0	0	0	0	0	0
g565.t1	80	95	93	187	166	175	68	118	93
g568.t1	734	900	787	726	875	880	494	587	446
g569.t1	1165	1143	1139	1041	1157	1218	571	557	749
g570.t1	319	357	354	327	431	335	184	251	237
g574.t1	130	90	141	109	184	156	335	382	207
g575.t1	39	32	43	42	47	32	48	97	42
g571.t1	844	872	826	780	758	881	685	867	657
g576.t1	303	340	357	331	326	436	219	244	316
g578.t1	1840	1715	1638	1868	1741	1934	1149	1488	2029
g582.t1	0	0	0	0	0	0	0	0	0
g583.t1	1056	1297	1126	1149	1144	1163	761	778	1595
g583.t2	177	125	261	138	202	100	33	106	124
g584.t1	684	665	634	786	749	743	1109	1309	918
g587.t1	1520	1536	1687	1709	1761	1645	909	1117	742
g588.t1	1284	1491	1468	1532	1430	1646	903	1090	809
g589.t1	254	240	270	210	298	305	278	330	348
g592.t1	2542	2393	2632	2900	2915	3035	3238	4104	3020
g594.t1	558	622	578	570	561	652	530	648	359
g597.t1	479	478	426	468	483	479	224	310	272
g601.t1	148	187	205	174	194	186	94	104	140
g602.t1	41	73	51	64	65	88	44	62	70
g604.t2	0	0	0	0	0	0	0	0	0
g604.t1	142	172	135	148	200	191	122	195	253
g603.t1	2209	2169	2192	2396	2348	2362	1761	2049	1591
g605.t1	2674	3011	2918	2867	2909	2873	1742	1823	1920
g607.t1	27	26	16	22	16	18	0	0	30
g606.t2	658	696	721	633	625	601	416	482	414
g606.t1	49	48	57	43	30	60	12	32	14
g608.t1	118	170	130	164	177	232	81	109	103
g610.t1	38	58	53	65	56	87	44	58	55
g611.t1	258	254	255	263	235	296	190	168	301
g617.t1	425	369	363	378	343	377	316	387	381
g619.t1	778	871	772	767	637	773	528	613	531
g616.t1	16669	16083	17202	16707	16464	16887	10285	12362	7552
g621.t1	1517	1718	1572	1682	1698	1696	1030	1155	1408
g622.t1	449	409	567	509	409	430	216	270	368
g623.t1	3298	3216	3234	3242	3330	3574	1764	2060	2653
g629.t1	15	49	37	47	60	33	21	43	90
g628.t1	132	128	167	154	166	155	56	79	78
g625.t1	49	53	49	50	47	36	35	33	45
g626.t1	1979	1709	1737	1886	1639	1763	945	1172	1024
g630.t1	9330	9476	9476	9380	9055	9538	7267	9464	12205
g633.t1	11	19	26	0	0	0	0	0	0
g632.t1	4333	4234	4485	4527	4378	4388	2708	3368	2457
g634.t1	626	731	679	751	599	757	697	629	373
g635.t1	282	261	263	218	325	222	140	189	173
g636.t2	891	759	719	818	595	1125	467	418	449
g636.t1	801	1125	1146	954	1139	611	549	733	533
g637.t1	1402	1528	1521	1305	1223	1186	933	1108	1118
g640.t1	936	1007	990	749	778	807	610	836	1949
g641.t1	467	567	485	573	587	552	290	311	375
g642.t1	241	287	318	341	399	435	211	218	276
g643.t1	766	967	929	909	1030	1010	482	563	573
g645.t1	57	59	53	30	37	94	37	36	37
g646.t1	21	19	12	13	22	20	12	0	26
g647.t1	620	568	709	767	858	813	569	624	714
g649.t1	179	172	193	216	238	234	121	134	129
g651.t1	1609	1433	1607	1781	1603	1749	930	1036	1186
g654.t1	296	256	295	185	220	236	915	941	501
g652.t1	862	693	764	846	751	810	868	1114	815
g655.t1	943	833	1197	1002	1090	1094	3121	4157	2930
g658.t1	120	120	90	136	154	116	331	387	255
g657.t1	3942	4034	4156	3568	4013	3914	3058	3773	2126
g661.t1	53	41	44	37	48	46	15	31	72
g660.t1	12191	12985	12451	12568	12404	14009	8120	9164	6090
g663.t1	0	0	13	0	16	0	0	0	0
g662.t1	1804	1893	1864	1892	1876	1964	758	879	909
g664.t1	530	491	473	547	506	514	258	245	264
g666.t1	1239	1744	1473	1465	1578	1605	1211	1137	978
g668.t1	1446	1342	1232	1484	1531	1569	3242	3591	1883
g669.t1	1902	2026	1997	2019	2038	1962	1097	1302	1342
g670.t1	396	435	468	526	433	544	1041	1274	751
g671.t1	975	971	1090	1153	992	1177	1654	2021	1896
g673.t1	476	473	498	609	576	639	288	352	355
g680.t1	492	540	460	472	525	581	139	174	89
g681.t1	720	851	655	675	692	814	500	588	437
g672.t1	24551	24631	25695	24021	23754	24788	14277	16945	22465
g684.t1	2963	2775	2901	3053	2845	3003	1551	1999	2098
g685.t1	1458	1461	1589	1523	1520	1504	919	1196	932
g686.t1	691	723	808	902	976	960	333	403	991
g688.t1	440	461	518	265	238	247	342	378	463
g689.t1	2964	2939	2700	2921	2885	2670	1174	1475	980
g690.t1	515	563	618	534	629	586	379	361	445
g694.t1	44	24	39	40	29	38	0	0	19
g695.t1	35	80	88	80	97	123	160	191	160
g696.t1	299	288	286	336	269	333	210	269	713
g698.t1	1218	1207	1231	1438	1441	1588	1927	2560	2194
g691.t1	33969	37228	34817	26920	26133	27205	18331	21509	27632
g699.t1	1094	979	1157	1046	1064	1282	638	738	602
g703.t1	379	306	374	386	347	383	182	189	276
g705.t1	140	83	119	155	138	170	31	44	54
g704.t1	4714	5043	4960	5065	5127	5298	2977	3373	4259
g707.t1	84	84	75	51	70	80	122	190	161
g706.t1	956	882	932	974	911	999	419	542	464
g708.t1	871	739	883	978	969	1073	1291	1451	1117
g709.t1	686	666	749	680	721	698	589	646	1216
g715.t1	481	480	536	629	642	577	271	321	378
g716.t1	844	903	871	944	933	961	330	362	509
g717.t1	2601	2919	2635	2964	2937	2825	1455	1605	1763
g718.t1	466	518	531	534	582	469	299	343	257
g721.t1	0	9	0	0	0	7	0	0	0
g722.t1	319	349	345	390	407	390	651	696	493
g723.t1	954	901	882	1168	952	1002	863	1131	1290
g725.t1	410	366	496	403	444	417	298	427	400
g726.t1	601	701	586	645	657	650	384	455	749
g727.t1	833	897	882	888	970	926	442	615	617
g731.t1	30	0	7	8	8	6	7	5	17
g730.t1	157	139	157	179	162	179	67	102	102
g734.t1	757	979	941	990	1056	830	142	173	1028
g735.t1	130	137	122	105	134	133	229	250	168
g719.t1	47838	50810	50039	41283	42696	43448	25707	30528	45614
g736.t1	38	0	37	29	33	44	0	30	30
g738.t1	4140	4331	4199	4076	4287	4465	1683	1951	1669
g741.t1	429	502	414	521	506	481	770	978	754
g739.t1	3117	2814	3136	3794	3682	3662	2183	2508	2829
g742.t1	6714	7514	7234	6192	5961	7114	3238	3368	3714
g745.t1	112	126	131	64	73	109	90	141	67
g744.t1	12885	14692	13171	13552	13584	14717	5992	6493	4559
g746.t1	4132	4595	4417	4085	3992	4350	2815	3124	2070
g747.t1	3439	3313	2875	3311	3596	3716	2440	2856	1811
g748.t1	649	766	679	809	690	754	474	384	309
g750.t1	55	81	109	91	66	81	0	30	0
g749.t1	1242	1375	1312	1562	1535	1499	439	434	636
g751.t1	181	155	141	172	146	143	105	173	121
g752.t1	1567	1482	1626	1617	1885	1891	871	1053	1370
g754.t1	48	64	52	78	82	67	33	29	0
g753.t1	3268	3330	3182	3191	3132	3158	2547	2998	2082
g755.t1	1017	995	992	1068	1086	1080	668	780	595
g757.t1	1583	1659	1508	1784	1720	1722	851	1144	1397
g759.t1	370	336	371	327	349	286	345	416	472
g760.t1	20	26	16	20	40	61	32	34	41
g763.t1	1364	1343	1411	1462	1454	1512	1114	1098	1052
g764.t1	1154	1438	1114	1156	1220	1094	821	911	820
g767.t1	156	267	191	160	142	135	126	202	320
g768.t1	473	354	417	411	360	511	379	392	207
g769.t1	476	522	485	454	538	451	321	328	327
g766.t1	17544	17560	16958	15632	15034	15809	9528	10895	15208
g770.t1	2623	2372	2452	3289	3186	3370	1310	1525	2278
g774.t1	16	12	40	19	18	22	0	12	0
g773.t1	546	495	597	534	575	593	1284	1715	938
g776.t1	573	529	541	647	550	597	407	491	753
g778.t1	1371	1482	1393	1340	1232	1287	916	1120	738
g779.t1	2243	2299	2291	2292	2335	2290	1440	1578	1327
g780.t1	373	430	474	540	545	450	171	250	191
g781.t1	1456	1430	1453	1678	1461	1700	401	551	486
g782.t1	117	92	129	91	125	96	29	49	78
g783.t1	88	126	128	85	77	128	68	76	58
g784.t1	519	500	513	545	612	580	683	618	761
g787.t1	494	497	547	430	528	529	327	480	493
g788.t1	69	79	58	50	52	64	43	33	54
g790.t1	246	254	228	193	238	221	133	173	179
g789.t1	1486	1237	1255	1528	1543	1423	2253	2755	2253
g792.t1	530	718	574	573	600	544	357	408	651
g793.t1	119	95	111	81	92	59	88	86	53
g791.t1	3867	3487	3715	4050	3855	3596	2371	2824	4622
g794.t1	322	406	450	385	475	460	516	583	678
g796.t1	18	0	0	15	0	0	22	24	16
g797.t1	0	0	0	23	17	0	0	0	0
g795.t1	3378	3585	3470	2669	2891	2915	2879	3517	2747
g798.t1	604	746	714	688	628	688	301	335	514
g800.t1	1575	1794	1855	1552	1492	1653	1041	1419	2938
g801.t1	77	65	106	60	130	78	68	97	109
g802.t1	158	231	188	217	251	289	208	313	521
g803.t1	8	17	14	16	15	15	11	17	11
g804.t1	724	792	734	782	875	998	461	581	500
g806.t1	301	345	363	375	369	336	124	147	247
g805.t1	2975	3273	3250	3251	3159	3383	2146	2386	2153
g807.t1	191	173	206	231	181	200	87	126	113
g808.t1	2172	2332	2235	2339	2134	2392	1080	1210	1886
g812.t1	1105	1043	1193	687	723	757	2813	3580	2392
g813.t1	700	724	851	668	644	785	437	541	876
g814.t1	1609	1632	1639	1680	1603	1636	755	862	1629
g815.t1	3168	3301	3072	2852	2938	2940	2245	2470	2609
g816.t1	1835	1461	1937	2018	2042	1947	1259	1468	1137
g817.t1	2978	2772	2921	2977	3203	3219	1993	2388	2510
g818.t1	420	496	454	414	423	448	339	322	501
g821.t1	7	11	0	17	0	9	0	0	13
g820.t1	418	437	455	482	368	442	264	384	217
g819.t1	2456	2337	2639	2540	2627	2658	1780	2004	1599
g822.t1	2498	2513	2406	2315	2360	2106	2037	2138	4319
g824.t1	360	510	454	444	406	492	301	305	365
g823.t1	2080	2224	2142	2209	2170	2204	1420	1622	1345
g826.t1	44	66	82	105	123	113	226	262	128
g827.t1	4793	4349	4568	4972	4621	4926	2480	2949	4754
g828.t1	4822	4832	4572	5230	5176	5288	3187	3717	9717
g829.t1	1091	1245	1139	1050	1089	1077	548	646	632
g830.t1	195	239	243	225	205	239	147	172	150
g835.t1	124	117	119	126	133	142	77	85	107
g836.t1	79	146	157	125	126	128	75	70	49
g834.t1	645	563	645	659	709	716	1123	1324	1229
g839.t1	190	189	131	211	226	173	61	54	95
g837.t1	7547	8021	8293	7912	7604	8245	3926	4819	5377
g841.t1	201	167	120	122	153	131	107	118	128
g843.t1	35	37	25	27	35	27	30	41	35
g842.t1	213	178	201	312	199	270	90	117	164
g840.t1	1495	1220	1515	1526	1544	1441	1584	1857	1600
g845.t1	305	323	355	358	367	315	160	184	305
g844.t1	4234	4376	4411	4119	4028	4269	3962	4357	3339
g847.t1	644	751	637	766	730	739	337	436	432
g846.t1	2486	2372	2481	2063	1883	2006	1823	2364	1557
g848.t1	863	934	863	871	852	995	516	618	501
g850.t1	224	203	236	166	255	175	287	392	233
g851.t1	440	636	460	496	419	395	434	474	481
g849.t1	6634	6154	6997	6631	6456	6275	2799	3373	4417
g852.t1	259	213	265	250	295	300	144	188	234
g853.t1	211	121	172	163	116	182	96	113	98
g854.t1	1869	1887	1892	2339	2008	2063	1249	1433	1539
g855.t1	608	560	499	640	640	714	230	323	495
g857.t2	1959	1922	2481	2210	1755	1911	1402	1798	1309
g857.t1	901	861	465	666	1098	987	457	460	946
g858.t1	563	567	554	500	436	472	258	321	341
g860.t1	240	208	238	403	253	291	150	164	276
g863.t1	381	515	447	417	397	402	344	458	191
g862.t1	2535	2458	2465	2056	1987	1995	1343	1556	1610
g864.t1	277	323	260	360	304	268	147	153	457
g865.t1	732	778	676	543	717	668	506	474	463
g870.t1	66	71	44	67	78	72	59	76	103
g871.t1	24	45	13	73	107	86	108	164	143
g869.t1	640	679	693	630	658	607	409	530	513
g872.t1	303	256	295	315	324	278	153	158	158
g873.t1	1869	2053	1944	1282	1255	1472	1103	1287	1037
g874.t1	699	590	759	685	709	678	358	419	915
g875.t1	1670	2058	1978	1479	1665	1833	1278	1408	1405
g876.t1	3564	3817	3741	3170	3308	3540	1008	1308	2169
g878.t1	859	973	839	929	820	1044	490	696	607
g879.t1	585	643	707	718	609	723	416	487	566
g880.t1	941	933	917	802	766	799	642	650	782
g877.t1	16987	18690	17383	15453	14852	16458	13321	16328	15977
g881.t1	928	795	1104	902	757	872	551	692	644
g884.t1	1382	1602	1542	1436	1537	1432	1097	962	1231
g886.t1	70	88	112	68	103	100	76	85	55
g885.t1	15760	16153	16683	13706	13473	14398	13213	15738	10585
g887.t1	1829	1690	1730	2042	2202	2008	833	988	887
g888.t1	463	419	418	840	558	570	337	237	337
g888.t2	96	77	41	40	76	161	0	92	52
g889.t1	178	220	184	460	371	501	107	129	163
g890.t1	130	173	116	170	197	137	46	98	114
g893.t1	292	349	366	345	324	264	199	257	133
g897.t1	135	114	166	171	139	132	77	98	115
g892.t1	1839	1791	1964	2076	1984	1897	1131	1414	1396
g898.t1	839	1012	1010	916	1008	868	577	673	607
g900.t1	376	367	258	227	328	304	140	159	277
g901.t1	3958	3265	3773	3558	3498	3734	2475	3123	2294
g902.t1	815	905	870	993	977	957	448	436	727
g904.t1	25	0	15	22	17	16	14	9	24
g903.t1	464	397	391	376	381	476	279	385	387
g905.t1	181	226	236	241	241	188	161	177	133
g906.t1	1075	1052	888	1056	1078	1139	300	382	539
g907.t1	2112	2449	2462	1992	2168	2282	1054	1262	1022
g908.t1	5303	5358	5281	5104	5076	5193	2809	3405	12929
g909.t1	597	613	581	576	431	620	188	219	330
g910.t1	528	628	651	682	677	684	337	404	526
g911.t1	3430	3643	3729	3330	3448	3515	2365	2908	3818
g914.t1	147	141	141	51	72	104	98	181	115
g912.t1	2851	2821	2667	3177	3155	2966	1575	1775	1749
g913.t1	13	20	12	33	14	0	0	0	0
g915.t1	1286	1306	1229	1434	1510	1475	650	782	857
g917.t1	166	215	173	258	274	248	263	339	414
g916.t1	1098	1240	1086	1036	1112	1030	680	762	877
g918.t1	478	486	573	604	608	672	317	441	442
g920.t1	146	98	107	141	169	184	78	68	103
g921.t1	130	109	115	111	171	149	93	98	150
g919.t1	2050	1858	1944	2039	2220	2089	1181	1705	1530
g922.t1	2613	2411	2302	2686	2508	2839	1372	1646	420
g923.t1	1791	1938	1757	1959	2104	2216	1115	1316	875
g924.t1	1332	1329	1280	1555	1460	1492	1144	1315	1283
g927.t1	1074	1045	1131	1105	1070	1215	674	824	593
g928.t1	477	538	556	575	628	610	287	324	306
g929.t1	578	679	612	700	772	798	386	390	357
g930.t1	317	381	372	409	434	503	511	470	521
g931.t1	681	619	737	699	759	797	657	833	658
g932.t1	746	643	805	753	813	879	565	781	707
g934.t1	2009	2026	2088	2206	2352	2314	1106	1421	1490
g937.t1	262	304	378	691	635	659	179	203	227
g939.t1	170	190	141	198	261	226	132	140	250
g938.t1	2602	2671	2528	2390	2317	2575	1592	1824	1520
g940.t1	513	550	548	428	506	414	499	445	388
g942.t1	37	41	52	32	33	18	38	35	33
g941.t1	987	892	999	968	978	942	507	607	454
g943.t1	648	621	635	685	701	707	445	450	421
g944.t1	631	709	595	690	699	734	411	427	437
g945.t1	125	139	159	143	139	153	57	98	94
g945.t2	22	0	0	0	0	0	17	0	0
g946.t1	3419	3171	3392	3084	2881	3133	2352	2701	1792
g948.t1	466	481	589	355	327	406	162	223	354
g949.t1	1240	1199	1157	1588	1426	1545	361	391	1008
g950.t1	168	122	163	147	182	175	203	189	357
g951.t1	244	234	336	292	281	367	464	503	452
g952.t1	20890	23027	21722	17675	17771	19641	16570	19957	11475
g953.t1	193	204	225	218	184	218	221	374	278
g956.t1	336	400	305	522	471	528	263	308	255
g955.t1	2617	2589	2676	3132	2851	3474	1443	1736	1204
g959.t1	841	866	888	943	868	956	864	1017	1458
g960.t1	174	127	113	117	130	150	156	164	118
g966.t1	383	330	346	407	459	491	761	942	780
g965.t1	7561	8041	8333	7004	7140	6771	5073	5578	6088
g967.t1	463	407	485	538	490	606	299	390	460
g969.t1	138	155	191	174	153	182	72	71	118
g970.t1	694	723	676	760	716	767	345	416	351
g971.t1	241	293	193	259	302	289	124	150	265
g972.t1	1735	1703	1799	1672	1482	1590	1134	1301	1154
g974.t1	387	407	320	341	365	388	529	658	711
g973.t1	3536	3495	3698	3566	3634	3523	2285	2515	3184
g975.t1	6344	5917	6066	4722	4539	4406	2071	2646	3138
g977.t1	183	161	225	145	151	179	84	90	64
g978.t1	390	404	437	277	303	301	939	1149	1461
g980.t1	318	283	268	238	240	218	208	221	154
g976.t1	6174	6379	6548	6049	6000	6354	2939	3430	5276
g981.t1	5974	5938	6168	5350	5186	5408	3859	4443	5211
g982.t1	39	54	67	56	85	76	35	44	77
g984.t1	5220	5168	5454	5507	5054	5263	3083	3470	2878
g986.t1	9238	9597	9544	9687	9248	9695	5721	7144	4358
g989.t1	216	224	268	269	233	240	644	751	490
g987.t1	31	33	24	21	26	33	14	17	36
g988.t1	5415	5242	5282	5094	4889	5545	3065	4149	2886
g990.t1	4967	4948	5069	4098	4137	4391	2867	3018	6050
g991.t1	298	253	308	270	341	399	273	307	281
g993.t1	49	42	0	45	0	35	0	0	0
g992.t1	1753	1759	1838	1922	1982	1763	1580	2408	1346
g995.t1	509	428	485	519	468	616	298	335	331
g996.t1	144	169	173	119	102	110	92	122	159
g998.t1	84	138	84	99	95	97	66	80	76
g997.t1	1380	1520	1393	1578	1567	1604	960	1181	1053
g1003.t1	0	0	0	0	0	0	0	0	0
g1004.t1	143	174	159	165	137	170	44	39	99
g999.t1	886	980	1060	1204	1029	1142	643	728	853
g1005.t2	0	0	0	0	0	0	0	0	0
g1005.t1	2635	2733	2782	2679	2673	2658	1515	1738	1897
g1006.t1	1738	1543	1761	1563	1767	1788	888	958	1100
g1009.t1	2783	2849	2916	2815	2764	3089	1477	1797	2179
g1007.t1	41956	48049	45373	34074	33050	36397	25355	30055	26821
g1010.t1	3402	3617	3618	2174	2283	2503	2857	3365	2600
g1011.t1	1534	1633	1776	1319	1214	1284	2471	2764	4012
g1012.t1	456	566	494	450	482	452	348	349	392
g1013.t1	688	673	649	520	568	612	285	335	308
g1014.t1	771	873	846	636	617	599	1763	2142	2723
g1016.t1	6400	6899	6391	5530	5582	5925	4628	6007	10562
g1017.t1	1585	1752	1636	1616	1446	1569	811	941	1177
g1019.t1	258	339	287	366	402	353	373	525	364
g1020.t1	724	682	623	861	774	819	226	301	398
g1018.t1	8057	8485	8435	8103	8344	8160	5276	6349	5113
g1021.t1	902	894	876	1013	922	868	509	596	755
g1022.t1	250	256	232	251	256	179	91	134	163
g1023.t1	46	65	44	51	61	40	5	14	25
g1024.t1	2510	2475	2645	2518	2623	2691	1237	1626	1297
g1026.t1	5183	5722	5574	5549	5831	6089	2907	4118	7110
g1027.t2	3694	4113	3822	4068	3670	3696	2152	2434	2615
g1027.t3	3171	2857	2945	2600	3513	3951	1744	2240	2272
g1027.t1	161	95	78	191	76	102	66	46	59
g1028.t1	1511	1579	1597	1685	1589	1748	714	930	1284
g1029.t1	2968	3248	3066	2673	2804	2808	2502	3082	5214
g1032.t1	27	35	30	42	20	28	31	21	22
g1033.t1	72	51	71	42	35	40	211	176	184
g1036.t1	103	149	138	146	125	183	63	96	74
g1031.t1	7852	8993	8708	8343	8612	9098	2303	2785	5225
g1037.t1	920	1074	1007	975	897	1069	468	529	568
g1038.t1	3520	3809	3699	3306	3499	3510	2745	3285	4054
g1039.t1	2237	2573	2616	2455	2647	2686	952	1207	1443
g1043.t1	39	39	48	54	62	46	18	0	0
g1041.t1	985	850	902	1054	973	991	520	643	686
g1045.t1	18394	22254	18901	17180	17013	17784	9655	9361	8960
g1046.t1	2770	2907	2991	2954	2859	2921	1047	1218	1307
g1047.t1	208	216	235	98	161	148	161	248	181
g1048.t1	2577	2688	2561	1913	1933	1847	2163	2487	3541
g1049.t1	5183	5200	5327	5656	5848	6023	2739	3190	2523
g1050.t1	1601	1586	1605	1393	1512	1474	908	1090	1403
g1052.t1	310	319	378	352	335	290	199	183	303
g1055.t1	3899	3657	3882	3266	3429	3368	3943	4953	5357
g1056.t1	928	763	881	996	991	986	411	462	552
g1057.t1	2100	2043	2214	1967	1958	2049	1087	1363	1967
g1058.t1	324	287	379	299	226	367	211	320	326
g1059.t1	1237	1160	1279	1036	979	1004	604	673	679
g1062.t1	15	27	25	18	30	14	17	23	43
g1064.t1	471	533	474	353	250	383	312	362	318
g1065.t1	75	75	90	120	132	89	0	0	0
g1060.t1	17887	18742	18494	17306	16651	18654	6825	8129	8290
g1066.t1	4288	4444	4725	4847	4681	4971	1280	1623	2046
g1067.t1	1950	1598	1833	2295	2439	2250	1698	1946	2756
g1069.t1	433	487	388	342	398	480	330	422	509
g1072.t1	827	863	875	931	749	843	477	593	595
g1075.t1	8	0	9	17	15	0	18	16	36
g1073.t1	937	842	904	995	917	864	717	1016	920
g1076.t1	1853	1901	1724	1839	1741	2061	1537	1682	1895
g1077.t1	417	375	495	467	462	539	1221	1500	1058
g1078.t1	122	147	169	126	138	114	48	48	115
g1079.t1	81	66	59	64	51	48	36	32	34
g1080.t1	1501	1612	1619	1598	1702	1788	1244	1519	4042
g1082.t1	18	26	22	19	13	21	8	0	17
g1081.t1	593	482	549	482	465	370	362	474	328
g1085.t1	0	0	0	0	0	0	0	0	0
g1086.t1	236	245	244	213	194	231	111	124	238
g1084.t1	1976	1951	1968	1917	1936	2248	3680	4666	4149
g1089.t1	298	323	278	345	275	324	211	309	335
g1090.t1	143	151	196	161	181	146	53	76	81
g1091.t1	238	280	249	327	315	349	107	98	259
g1092.t1	157	140	235	234	190	229	460	553	400
g1093.t1	1614	2143	1824	2025	1810	2091	1289	1413	455
g1095.t1	0	0	0	0	0	0	0	0	0
g1094.t1	1032	1139	1078	1037	1080	1151	498	629	613
g1097.t1	13	26	17	19	24	9	9	6	27
g1096.t1	8557	9242	8773	7387	7495	8027	5292	6154	4386
g1098.t1	2737	2840	2749	2500	2652	2698	1551	1901	2460
g1099.t1	3526	3736	3542	3507	3629	3678	2026	2438	3581
g1100.t1	1175	1063	1197	1123	1164	1099	652	805	1263
g1101.t1	2126	2654	2260	2380	2234	2329	1074	1219	3842
g1103.t1	510	531	533	567	585	612	311	320	386
g1105.t1	111	149	146	144	170	212	124	125	114
g1104.t1	7287	7033	7510	6552	6283	6407	5305	6372	5262
g1106.t1	1616	1694	1712	1871	1809	1883	833	968	1237
g1108.t1	16	11	27	18	26	24	25	48	59
g1110.t1	410	468	446	457	383	419	265	345	465
g1113.t1	24	39	26	47	51	45	10	9	26
g1111.t1	2159	2449	2380	2234	2261	2404	1146	1539	1388
g1114.t1	538	575	504	524	462	549	356	412	479
g1115.t1	1235	1092	1152	1106	755	1123	968	1041	1545
g1115.t2	14	17	0	9	293	16	19	16	24
g1117.t1	642	806	644	627	669	644	424	429	431
g1120.t1	182	113	115	143	203	179	53	71	47
g1118.t1	3459	3712	3595	3036	3106	3257	1661	2129	1711
g1121.t1	1211	1355	1200	1292	1157	1384	641	764	495
g1124.t1	448	437	421	453	460	532	872	999	879
g1125.t1	2150	2506	2272	1863	1778	1949	1756	2289	2031
g1126.t1	880	929	874	1068	1008	1045	508	541	507
g1129.t1	9	7	8	0	17	7	0	0	9
g1127.t1	844	862	889	785	796	999	809	1053	683
g1133.t1	139	139	100	109	157	140	342	429	236
g1135.t1	75	131	57	108	142	146	43	43	31
g1136.t1	316	325	303	344	338	342	175	286	271
g1141.t1	268	282	262	384	309	258	153	193	327
g1140.t1	5527	5941	5752	5449	5914	6312	2573	2907	4478
g1142.t1	7951	8406	7692	8569	8202	8600	4365	4862	6175
g1144.t1	1906	2006	2024	2083	2078	2083	1013	1190	1490
g1146.t1	3163	2960	3000	3144	2872	3227	1833	2295	1808
g1147.t1	2641	2998	2994	2836	3015	3109	1758	1916	1772
g1149.t1	4234	4378	4137	4331	4325	4772	2249	2653	1731
g1152.t1	544	606	376	510	527	603	422	358	313
g1152.t2	209	244	319	274	122	178	124	140	334
g1155.t1	126	144	92	114	119	74	285	385	118
g1153.t1	1049	956	977	1053	1014	1095	1222	1385	1264
g1156.t1	2200	2346	2419	2122	2123	2196	1633	1973	2609
g1158.t1	2269	2142	2196	2361	2286	2172	960	1194	1321
g1159.t1	516	466	527	655	569	593	306	311	437
g1161.t1	364	352	352	390	401	386	130	193	167
g1164.t1	11	12	0	5	7	8	0	5	0
g1163.t1	5201	5070	5447	5908	5732	6118	6729	8104	8354
g1170.t1	64	56	59	69	72	73	45	46	56
g1171.t1	182	192	173	237	233	204	343	438	254
g1173.t1	505	581	558	481	436	525	417	397	423
g1177.t1	1106	1304	1273	1102	1106	1196	2103	2110	2079
g1178.t1	583	482	518	623	498	544	234	236	231
g1179.t1	91	130	99	94	142	94	78	87	161
g1180.t1	75	77	61	96	95	83	5	8	16
g1182.t1	4134	4233	4287	4044	3916	4020	1825	2578	4997
g1183.t1	710	687	746	626	778	723	593	696	848
g1184.t1	263	198	275	216	277	329	307	407	337
g1185.t1	64	59	77	75	61	74	74	74	60
g1186.t1	40	17	43	34	46	50	38	46	77
g1187.t1	57	82	63	69	16	54	27	19	35
g1188.t1	33	0	25	39	51	28	78	136	43
g1189.t1	110	168	152	126	189	193	273	307	352
g1190.t1	2096	1891	1946	2343	1957	2284	3546	4423	4106
g1197.t1	606	558	527	535	629	563	1591	1778	1081
g1198.t1	34	55	51	39	76	83	9	17	34
g1199.t1	454	427	522	464	475	488	342	370	505
g1200.t1	3396	3426	3417	3938	3817	4156	1959	2252	2213
g1201.t1	1093	1013	1185	1679	1418	1623	1048	1354	903
g1203.t1	731	776	784	1260	1009	1080	495	518	708
g1204.t1	472	551	536	480	456	657	239	156	198
g1205.t1	418	386	481	466	457	498	141	168	180
g1208.t1	197	226	230	238	268	321	92	72	70
g1209.t1	1623	1745	1753	1634	1729	1815	1050	1037	1414
g1211.t1	502	487	599	532	568	610	457	511	426
g1212.t1	2050	2086	1929	1860	1771	1939	1103	1276	1651
g1217.t1	215	224	225	210	171	231	95	116	90
g1213.t1	5661	5533	5872	5079	4789	4982	4572	5364	6037
g1220.t1	1672	1563	1715	1668	1619	1671	1342	1494	1053
g1221.t1	2123	2186	2135	2080	1862	2186	1352	1585	1302
g1223.t1	1165	1110	1324	1139	1103	1202	686	853	703
g1224.t1	814	811	753	711	784	796	544	531	516
g1226.t1	650	718	776	658	633	671	457	511	501
g1227.t1	0	0	0	0	0	1423	0	0	0
g1227.t2	3359	3450	3846	3280	3299	2201	2158	2542	1478
g1228.t1	1517	1696	1638	1492	1621	1705	856	1064	1319
g1231.t1	695	716	710	714	660	730	360	454	325
g1233.t1	248	250	241	259	288	304	132	187	215
g1232.t1	1385	1327	1463	1455	1355	1468	897	1051	683
g1235.t1	40	0	47	0	0	0	0	0	0
g1237.t1	77	59	58	73	63	112	128	123	142
g1236.t1	825	842	822	939	901	972	1074	1314	1512
g1238.t1	381	463	404	496	386	405	306	374	236
g1239.t1	72	69	70	111	120	135	181	92	162
g1241.t1	361	390	394	346	302	335	249	246	456
g1244.t1	14	15	23	10	31	26	23	13	21
g1245.t1	125	145	82	150	119	120	62	95	70
g1243.t1	2736	3080	2863	3350	3124	3282	2143	2440	4377
g1247.t1	1278	1255	1295	1531	1469	1392	585	858	528
g1250.t1	24	19	0	16	28	36	31	106	44
g1249.t1	204	195	149	205	186	166	177	224	205
g1252.t1	2052	2302	2154	2308	2032	2250	1243	1480	1424
g1257.t1	56	91	51	76	34	54	37	43	47
g1258.t1	927	982	1043	990	1010	1099	675	793	859
g1256.t1	12234	12071	12731	12165	12580	12931	7080	7955	11944
g1260.t1	3722	3876	3936	4686	4468	4390	2051	2391	5890
g1263.t1	78	97	102	114	86	155	33	37	127
g1262.t1	863	804	819	890	863	891	441	462	521
g1264.t1	18388	17641	18474	16077	16061	16274	13526	16248	18521
g1270.t1	0	0	0	33	40	41	13	14	21
g1269.t1	14	0	0	0	11	11	0	0	0
g1265.t1	3611	3948	3882	3716	3539	3556	2342	2830	2408
g1274.t1	530	521	571	609	623	710	1186	1340	682
g1272.t1	4056	4214	3834	3487	3395	3376	3004	3723	2695
g1278.t1	0	0	221	81	192	240	0	184	71
g1277.t1	202	290	266	248	286	292	182	196	239
g1278.t2	797	720	608	646	640	412	560	417	541
g1275.t1	8959	9018	9202	10499	9968	10450	3560	4151	7165
g1279.t1	1039	1051	973	676	630	802	784	923	885
g1281.t1	2221	2620	2246	1232	1209	1307	1203	1425	1423
g1282.t1	824	1170	927	867	880	922	706	906	572
g1284.t1	580	696	735	551	457	561	461	509	534
g1285.t1	450	426	460	512	525	451	774	918	634
g1287.t1	121	150	186	150	126	110	50	60	22
g1286.t1	707	635	640	596	655	682	293	416	211
g1288.t1	2085	2326	2074	2381	2234	2375	1387	1587	1120
g1290.t1	222	263	269	285	261	344	587	655	475
g1289.t1	5082	5535	5169	4785	4902	5218	3472	4312	3404
g1294.t1	796	918	956	936	1022	1001	353	410	533
g1297.t1	53	88	59	79	81	121	40	53	71
g1300.t1	0	19	19	0	0	0	0	0	0
g1298.t1	1213	1236	1264	986	1013	1031	1028	1237	1769
g1302.t1	897	1039	906	1138	974	1049	614	626	854
g1304.t1	240	238	196	247	242	240	81	105	128
g1305.t1	2788	3234	2918	3409	3276	3206	1471	1742	3486
g1307.t1	699	675	704	650	694	708	1279	1619	1088
g1308.t1	1412	1416	1456	1562	1404	1637	831	1071	998
g1309.t1	110	83	98	94	97	106	33	67	38
g1311.t1	0	0	0	0	0	0	0	0	0
g1310.t1	1634	1436	1601	1727	1675	1659	756	898	648
g1312.t1	777	757	693	693	762	781	412	519	439
g1313.t1	174	192	194	187	210	202	56	144	67
g1315.t1	857	976	985	1478	1499	1575	1209	1309	1342
g1317.t1	2232	2355	2565	2303	2122	2210	1463	1755	1574
g1319.t1	49	60	75	68	73	73	42	47	57
g1320.t1	106	159	129	117	121	146	53	90	68
g1318.t1	1303	1145	1111	1179	1083	1150	928	1125	1334
g1321.t2	662	701	664	790	697	966	414	394	253
g1321.t1	442	499	354	499	544	424	194	315	236
g1322.t1	526	574	603	591	597	661	492	658	442
g1329.t1	143	103	100	117	205	115	27	37	0
g1330.t1	191	148	187	183	222	223	109	103	152
g1326.t1	15288	15007	15611	14689	14720	15019	8567	10213	9722
g1333.t1	88	84	89	106	102	109	54	81	60
g1334.t1	120	96	152	117	90	141	63	91	149
g1335.t1	164	115	168	177	198	174	118	187	151
g1337.t1	318	314	308	295	311	360	479	561	647
g1332.t1	7865	8010	8061	7465	7981	7898	5604	6396	13085
g1338.t1	362	338	376	416	366	382	314	303	211
g1339.t1	2216	2378	2236	2159	2157	2376	1479	1759	1664
g1340.t1	430	468	380	345	412	460	313	296	409
g1345.t1	44	70	83	73	30	68	199	221	320
g1342.t1	2885	3033	3347	2432	2685	2679	1944	2616	5799
g1346.t1	523	487	518	504	536	503	362	339	703
g1347.t1	2187	2496	2555	2517	2603	2593	1340	1715	3990
g1349.t1	655	647	653	699	598	739	420	510	431
g1350.t1	1203	1379	1168	1322	1070	1191	472	795	557
g1351.t1	2395	2186	2522	2963	2900	2923	1701	1933	2207
g1352.t1	1366	1380	1415	1497	1570	1461	779	899	983
g1355.t1	119	106	89	82	80	80	36	40	111
g1356.t1	0	25	26	0	0	32	13	46	0
g1356.t2	41	15	25	35	50	11	80	26	69
g1353.t1	2217	1838	2065	2173	2172	2087	1269	1679	1592
g1359.t1	337	455	453	358	410	430	199	239	380
g1357.t1	4097	4354	4074	3565	3511	3549	4120	4538	5587
g1361.t1	70	64	110	103	112	100	52	78	75
g1363.t1	179	152	225	212	210	195	93	71	109
g1362.t1	619	531	722	651	543	609	428	544	410
g1364.t1	794	887	876	921	997	1091	473	619	591
g1365.t1	1881	2045	2032	1897	2133	1927	1256	1464	1766
g1368.t1	37	45	55	40	62	54	63	93	31
g1370.t1	18	12	14	17	7	0	22	49	56
g1371.t1	13	20	22	25	33	24	16	17	44
g1372.t1	1251	1552	1474	1452	1422	1487	731	907	771
g1375.t1	607	579	600	605	654	659	321	325	335
g1379.t1	2486	2580	2673	2371	2308	2403	1251	1483	1525
g1382.t1	482	569	453	559	586	547	357	457	296
g1387.t1	29	31	51	37	26	27	13	24	0
g1386.t1	1644	1609	1471	1536	1378	1835	1527	1747	1286
g1388.t1	4132	4043	4424	4635	4520	4900	1566	1990	1863
g1389.t1	610	663	837	800	840	927	1090	1409	901
g1391.t1	808	750	839	828	841	923	1106	1282	1082
g1392.t1	1211	1353	1036	1234	1216	1319	499	711	1080
g1394.t1	85	105	77	82	86	101	17	22	29
g1393.t1	234	266	259	273	297	244	177	190	241
g1395.t1	204	207	235	182	197	216	570	675	520
g1397.t1	3452	3643	3712	3693	3551	3942	1938	2575	1345
g1401.t1	406	322	326	415	421	451	392	405	695
g1402.t1	446	419	471	499	554	610	634	667	894
g1403.t2	1277	1103	1393	1288	1239	1480	337	483	230
g1403.t1	885	986	738	1273	1088	970	165	0	201
g1405.t1	636	823	739	760	821	738	308	420	975
g1398.t1	11091	12023	11900	9236	9337	10915	2541	3104	2459
g1399.t1	37147	41209	38126	30607	32603	33420	6711	8435	18523
g1400.t1	365	393	423	339	353	362	306	330	393
g1406.t1	2525	2450	2619	2435	2443	2578	1565	1894	3427
g1409.t1	422	396	462	506	401	535	425	552	351
g1410.t1	301	294	315	332	357	271	134	106	253
g1412.t1	2261	1894	2046	2450	2191	2122	1079	1320	1230
g1414.t1	71	62	59	54	61	58	104	155	120
g1413.t1	958	1127	997	996	891	1153	511	546	494
g1415.t1	2548	2613	2482	3186	3131	3212	1524	1962	2262
g1417.t1	642	593	651	623	614	680	750	836	890
g1419.t1	339	352	364	455	386	363	180	215	253
g1420.t1	833	946	995	845	952	955	434	570	434
g1418.t1	12115	12590	11820	12204	11566	13451	5204	5946	2772
g1422.t1	240	233	240	169	237	257	308	346	78
g1421.t1	5266	5676	5526	5065	5051	4698	3592	3865	7789
g1425.t1	1349	1462	1598	1061	1241	1382	2974	3778	3516
g1428.t1	1215	1344	1315	1337	1119	1201	649	637	1610
g1430.t1	29	0	0	0	0	34	38	39	0
g1429.t1	7035	7328	7560	6886	7151	7732	4376	5120	4362
g1433.t1	0	0	0	0	0	0	0	0	0
g1432.t1	1408	1536	1429	1270	1121	1073	846	865	834
g1434.t1	3237	3336	3318	2663	2438	2489	4285	5412	3265
g1436.t1	73	108	71	140	141	139	21	58	47
g1437.t1	102	131	135	160	105	125	54	68	101
g1438.t1	59	109	67	49	57	58	19	18	27
g1435.t1	2375	2430	2402	2729	2726	2680	1423	1692	1295
g1439.t1	161	175	135	205	217	162	25	30	54
g1440.t1	57	36	42	47	53	47	0	27	25
g1441.t1	862	761	735	833	822	880	384	568	560
g1442.t1	1868	1799	1836	1914	1783	1906	1330	1549	2223
g1444.t1	270	243	247	360	400	357	256	301	414
g1446.t1	15	15	0	70	50	60	48	80	54
g1443.t1	4299	4554	4673	4710	4753	4736	1976	2607	5144
g1450.t1	398	421	416	539	448	520	269	426	350
g1454.t1	19	30	25	29	36	74	47	33	59
g1452.t1	1531	1543	1416	1343	1189	1400	1121	1313	1034
g1453.t1	432	422	448	376	328	312	141	247	357
g1455.t1	116	115	137	133	131	119	39	65	82
g1456.t1	7406	7425	7774	8491	8351	8486	3674	4962	2970
g1457.t1	1829	1884	1782	1953	1970	2041	1097	1253	829
g1460.t1	20	20	0	0	0	22	0	17	0
g1458.t1	3103	3171	3262	3232	3295	3237	2074	2713	2131
g1467.t1	44	36	30	111	55	73	19	25	15
g1464.t1	500	495	513	571	571	476	361	389	337
g1468.t1	160	118	133	131	131	139	59	60	111
g1470.t1	149	149	103	130	105	107	65	90	180
g1471.t1	845	828	913	871	887	1015	524	741	673
g1472.t1	208	205	204	193	221	209	106	119	368
g1474.t1	178	194	180	130	109	136	82	93	160
g1473.t1	1066	1146	1211	1070	1226	1007	464	670	564
g1476.t1	67	78	49	61	66	63	122	130	138
g1475.t1	277	242	295	325	270	300	154	147	218
g1478.t1	23	14	14	28	46	38	10	12	15
g1479.t1	129	64	72	85	77	80	66	56	84
g1477.t1	1898	1974	1959	1905	2110	1959	1148	1276	1490
g1481.t1	482	508	489	522	480	468	338	444	402
g1482.t1	9	18	9	21	11	16	0	7	12
g1483.t1	33	23	23	29	41	49	16	13	37
g1486.t1	741	710	665	653	638	594	371	537	514
g1486.t2	226	297	194	276	239	268	179	195	174
g1487.t1	457	447	388	411	460	509	263	307	371
g1488.t1	1923	1819	1793	1856	1832	2126	1510	1609	1585
g1489.t1	680	663	632	503	584	554	423	557	468
g1490.t1	783	805	825	940	1087	1137	498	710	580
g1492.t1	2585	2598	2611	2491	2570	2464	2667	3599	2009
g1493.t1	7883	7552	7974	7625	7943	8072	4219	4619	4684
g1494.t1	1007	769	923	883	778	1277	393	649	723
g1494.t2	212	610	435	351	511	137	206	85	270
g1499.t1	54	59	92	62	89	27	50	41	60
g1501.t1	13	17	16	14	0	13	0	13	11
g1498.t1	236	265	330	297	284	331	99	98	84
g1503.t1	16	14	14	0	12	0	19	0	51
g1506.t1	563	553	590	502	507	531	251	362	502
g1508.t1	20	32	54	46	0	10	19	16	16
g1507.t2	3477	3799	3563	3432	3859	3669	2553	3024	6759
g1507.t3	2608	4391	4405	4220	3942	4353	2736	3216	8469
g1507.t1	1715	0	0	0	0	0	0	0	0
g1510.t1	4666	4824	4608	4251	4303	4617	3401	4064	3121
g1511.t1	766	968	702	708	732	923	792	728	332
g1512.t1	95	81	83	109	56	107	24	82	164
g1513.t1	379	452	432	465	551	403	282	269	560
g1514.t1	0	0	0	0	0	0	532	0	0
g1514.t2	3219	3001	3205	3177	2962	3077	1189	2232	1616
g1516.t1	348	458	337	293	219	294	230	327	328
g1519.t1	829	839	786	819	797	867	367	411	578
g1520.t1	154	211	197	295	186	193	276	252	261
g1521.t2	405	383	382	409	265	366	210	235	275
g1521.t1	85	133	196	88	207	246	97	103	241
g1522.t1	1198	1088	1189	1273	1122	1100	791	900	816
g1523.t1	986	847	926	884	844	939	546	661	569
g1524.t1	5580	4946	5581	5720	5654	6076	3579	4507	2626
g1528.t1	151	79	134	107	102	105	52	44	74
g1527.t1	9187	8738	9324	7817	7918	7687	2655	2942	3422
g1529.t1	376	334	301	565	570	522	268	277	416
g1530.t1	76	69	73	95	70	98	94	118	91
g1532.t1	3179	3544	3473	2638	2824	2956	2132	3044	2814
g1534.t1	71	95	70	61	101	102	105	129	99
g1533.t1	3321	3459	3284	3349	3239	3452	2921	3470	2946
g1535.t1	1400	1449	1505	1505	1310	1255	828	1033	1767
g1537.t1	241	260	186	275	258	326	278	248	263
g1536.t1	1074	1225	1256	1193	1339	1300	690	945	1086
g1540.t1	366	410	386	376	362	490	170	208	257
g1542.t1	0	0	0	0	0	0	0	0	0
g1541.t1	621	684	553	544	540	598	479	566	733
g1543.t1	2979	3109	3264	2728	2948	3166	2077	2373	2399
g1544.t1	1130	1144	954	1019	1121	1251	568	810	1182
g1545.t1	1193	831	951	1491	1114	1256	952	1110	1218
g1546.t1	1125	1003	963	1433	1242	910	411	660	1410
g1547.t1	362	877	735	543	992	1065	590	351	525
g1548.t1	31	42	36	28	19	44	24	39	17
g1549.t1	223	237	260	287	245	305	154	156	281
g1550.t1	1644	1802	1734	1801	1627	1887	1025	1135	1096
g1550.t2	176	248	234	244	204	182	199	329	221
g1552.t1	87	125	99	115	145	199	96	128	115
g1551.t1	941	1197	1033	994	904	900	912	851	471
g1554.t2	0	0	0	0	0	0	0	0	0
g1554.t1	208	127	168	294	215	225	204	207	94
g1556.t1	405	468	348	312	386	377	257	282	284
g1557.t1	3697	3629	3642	3422	3502	3591	2813	3518	2455
g1559.t1	1004	1137	1118	918	983	1006	615	615	1672
g1561.t1	1814	1695	1767	2051	1809	2076	1259	1365	1707
g1567.t1	47	34	21	43	0	45	0	0	0
g1564.t1	2055	2077	2309	2309	2215	2352	1419	1652	1617
g1568.t1	413	349	458	428	480	443	759	758	345
g1569.t1	198	292	270	394	329	460	191	232	168
g1572.t2	464	335	449	515	411	561	163	266	344
g1572.t1	372	409	500	452	422	387	226	242	189
g1571.t1	5692	6600	5799	6802	6466	6894	3342	3863	6005
g1574.t1	3452	3353	3480	4023	3975	4177	2001	2444	3806
g1575.t1	1102	1203	1104	1225	1248	1515	595	597	775
g1577.t1	26	53	0	32	0	59	16	22	18
g1576.t1	0	728	561	546	591	613	364	501	248
g1576.t2	1276	726	731	771	791	694	551	712	528
g1578.t1	700	805	725	960	984	1029	1172	1274	813
g1579.t1	606	481	628	504	495	659	371	394	368
g1581.t1	298	310	225	268	336	266	235	225	147
g1582.t1	221	217	142	213	208	244	139	132	219
g1584.t1	480	586	520	555	498	537	396	402	593
g1586.t1	244	201	217	209	251	229	177	214	198
g1585.t1	2398	2620	2329	2232	2127	2161	1233	1299	1531
g1588.t1	111	117	94	153	128	168	0	0	20
g1590.t1	16	23	0	15	0	20	13	12	21
g1591.t1	32	0	27	53	42	41	27	0	0
g1592.t1	384	294	363	448	446	482	131	154	345
g1595.t1	165	154	148	196	167	178	60	75	112
g1596.t1	3580	3710	3966	5455	5143	5146	873	1107	1940
g1598.t1	0	0	0	0	0	0	0	0	0
g1599.t1	67	101	114	79	76	80	45	70	82
g1600.t1	1550	1839	1701	1439	1509	1639	1741	1998	1341
g1601.t1	330	356	291	243	279	268	165	253	286
g1602.t1	844	912	859	1174	1110	1220	375	435	774
g1603.t1	2609	2708	2854	2432	2604	2513	1410	1805	2629
g1604.t1	203	206	234	207	299	226	195	263	211
g1606.t1	450	429	376	390	439	420	214	242	350
g1605.t1	7756	8109	7789	8255	8264	8998	5695	6568	4283
g1607.t1	1746	1717	1801	1823	1919	1804	812	1047	1246
g1608.t1	2434	2761	2449	2386	2451	2618	1909	2419	1758
g1609.t1	1551	1383	1457	1497	1359	1566	1446	1689	1303
g1615.t1	100	110	111	132	140	145	187	264	87
g1613.t1	3650	3391	3464	3971	4009	4119	6397	7430	4508
g1618.t1	268	210	315	306	202	295	441	510	418
g1622.t1	253	212	287	341	243	242	140	97	230
g1625.t1	954	1019	993	903	876	906	508	607	819
g1627.t1	40	42	46	58	51	52	160	157	165
g1626.t1	654	704	721	847	921	877	446	496	514
g1630.t1	22	30	24	55	48	0	49	68	38
g1628.t1	2028	2225	2008	2414	2344	2470	1443	1906	1481
g1632.t1	1436	1694	1558	1350	1468	1454	428	535	656
g1635.t1	747	691	731	780	705	893	343	496	613
g1636.t1	2379	2804	2557	2530	2575	2973	1533	1846	1391
g1637.t1	594	656	598	1106	1114	1098	69	64	82
g1639.t1	34	32	35	27	0	27	0	0	0
g1640.t1	75	80	120	151	129	124	26	51	59
g1641.t1	737	820	745	938	782	752	411	434	698
g1642.t1	1372	1667	1522	1314	1211	1544	856	1070	1487
g1644.t1	1276	1345	1353	1138	1195	1267	652	770	990
g1647.t1	1425	1309	1357	1429	1266	1378	622	783	931
g1648.t1	893	824	921	954	870	966	424	478	531
g1650.t1	58	33	54	24	32	28	172	231	165
g1649.t1	1510	1450	1427	1763	1826	1652	1013	1213	1197
g1652.t1	523	509	560	418	362	355	324	461	306
g1651.t1	3939	3890	4153	3138	3273	3002	2641	2968	3327
g1655.t1	59	47	43	56	38	33	47	64	48
g1657.t1	22	16	16	22	19	23	0	0	0
g1659.t1	230	306	312	471	467	550	248	227	308
g1658.t1	1046	1099	1331	1193	1212	1308	814	941	611
g1660.t1	645	778	663	699	693	736	500	701	505
g1661.t1	5780	5315	5871	5560	5357	5529	3047	3694	3695
g1663.t1	2298	2474	2313	1209	1231	1355	1751	2183	2158
g1665.t1	280	359	302	180	140	198	287	267	309
g1667.t1	0	0	0	0	0	0	0	0	10
g1666.t1	2295	2499	2569	1187	1158	1371	2294	2949	2257
g1668.t1	351	398	378	425	471	364	263	275	719
g1669.t1	6536	7399	6907	7453	7519	8124	2284	2563	1675
g1670.t1	3868	3626	3672	4001	4114	4338	1606	2046	2989
g1671.t1	1260	1352	1367	1235	1162	1247	846	936	2255
g1673.t1	92	85	79	110	110	80	85	124	118
g1672.t1	877	887	1046	1055	980	1341	2563	3568	2556
g1674.t1	358	385	336	335	341	421	280	354	329
g1675.t1	8722	9190	9203	7360	7211	8022	4116	4778	8331
g1680.t1	2700	3030	2602	2866	2727	2940	1170	1395	3591
g1682.t1	153	209	147	181	165	168	116	104	81
g1681.t1	514	517	455	450	543	539	205	367	327
g1684.t1	942	906	926	889	807	998	731	896	727
g1687.t1	124	147	173	168	86	154	67	73	118
g1688.t1	152	197	217	142	178	202	154	128	121
g1689.t1	62	84	77	61	83	48	44	51	41
g1691.t1	172	195	166	127	124	119	108	122	158
g1692.t1	149	155	132	201	137	172	60	59	73
g1693.t1	34	28	33	32	27	48	14	17	23
g1695.t1	0	0	0	0	0	0	0	0	0
g1696.t1	42	36	64	36	50	0	0	38	26
g1700.t1	1882	2027	1847	2100	2046	2157	1089	1366	1488
g1702.t1	3782	4123	4139	3725	3964	4030	2213	2687	4003
g1704.t1	142	121	126	169	187	162	78	88	166
g1703.t1	3077	2540	2952	2973	3289	3060	4249	4966	4465
g1705.t1	536	604	628	634	514	631	238	321	279
g1706.t1	171	235	122	269	197	287	0	50	86
g1707.t1	47	58	85	66	47	72	0	49	0
g1708.t1	129	125	142	142	81	136	53	121	130
g1709.t1	3410	3343	3354	3048	2984	3127	1442	1682	1895
g1710.t1	5337	4959	5181	5469	5200	5002	2061	2387	2748
g1711.t1	829	729	930	333	383	334	470	651	169
g1714.t1	2995	3444	3263	3228	2927	3221	1779	2009	2115
g1715.t1	385	374	362	459	377	389	429	531	500
g1717.t1	1189	1090	1287	1023	1108	1218	5204	5630	4044
g1718.t1	461	528	516	525	528	592	245	289	299
g1719.t1	3486	3698	3597	3363	3487	3459	2609	2904	3927
g1720.t1	1049	1070	1100	931	971	1023	645	730	2232
g1722.t1	484	527	507	404	428	453	271	367	486
g1723.t1	350	338	370	393	448	476	806	875	675
g1724.t1	446	381	412	484	395	404	262	268	468
g1728.t1	0	18	0	17	0	29	0	21	32
g1727.t1	1487	1493	1514	1859	1763	1699	624	733	818
g1730.t1	31	32	26	22	23	28	17	16	16
g1729.t1	883	902	858	804	799	969	631	863	646
g1732.t1	422	441	421	415	441	473	376	429	379
g1733.t1	3939	4738	4450	4502	4447	4833	2491	2794	1398
g1734.t1	774	887	853	938	864	986	392	398	307
g1736.t1	131	142	46	45	138	59	64	15	16
g1735.t1	1402	1558	1484	1641	1608	1623	772	929	812
g1737.t1	17299	17912	17340	15303	15322	16082	11174	13415	16643
g1739.t1	1940	2143	2122	2388	2434	2356	1521	1856	1738
g1740.t1	408	413	429	549	530	659	284	296	415
g1738.t1	16486	18049	18302	16048	16045	16014	10553	11465	21540
g1741.t1	1450	1284	1294	1389	1207	1252	2312	2411	3406
g1743.t1	388	376	352	408	348	352	237	254	482
g1744.t1	1003	738	801	1075	1050	969	616	724	753
g1745.t1	803	918	894	712	797	765	499	496	670
g1747.t1	31	44	34	24	34	30	22	22	17
g1746.t1	420	342	340	347	361	434	205	304	329
g1749.t1	0	0	0	0	0	0	0	0	0
g1748.t1	7054	8456	7426	3391	3575	3800	2256	2942	2693
g1752.t1	479	399	406	474	398	440	296	299	557
g1755.t1	120	181	126	160	154	178	57	87	72
g1757.t1	289	256	273	372	410	333	158	235	257
g1754.t1	3835	3998	4103	4282	4320	4256	2384	2899	2336
g1759.t1	2637	2676	2796	2666	2655	2752	1995	2498	3414
g1760.t1	1883	2049	1819	2504	2384	2708	1099	1236	959
g1763.t1	113	129	142	138	156	95	83	79	150
g1762.t1	2981	2571	3076	3076	3114	3134	2358	2647	2980
g1764.t1	643	719	653	710	687	620	314	516	827
g1765.t1	743	708	582	677	654	690	622	666	992
g1766.t1	275	340	343	242	377	294	121	177	424
g1767.t1	205	212	207	265	215	275	163	169	274
g1769.t1	267	275	292	279	281	244	196	186	218
g1770.t1	432	308	506	428	397	407	875	1134	674
g1771.t1	20098	21345	19867	18753	19371	20195	8646	9580	8354
g1773.t1	790	731	806	751	811	933	452	555	673
g1774.t1	666	665	673	738	716	731	354	440	632
g1775.t1	535	420	458	493	436	481	269	270	332
g1772.t2	13480	13750	12623	12921	12337	12971	7807	9239	6077
g1772.t1	2243	1802	2918	2370	2725	2800	1272	1782	1010
g1778.t1	2682	2978	2802	2280	2344	2270	2027	2437	2758
g1777.t1	18018	17005	17672	17142	16467	17040	10500	12411	13692
g1779.t1	2620	2617	2660	2186	2406	2613	1821	2270	1857
g1780.t1	2090	1987	2211	2001	2024	2010	1041	1266	2049
g1783.t2	0	0	0	0	0	0	0	0	0
g1783.t1	966	990	979	875	910	1054	481	483	595
g1784.t1	4201	4585	4660	3752	3679	4019	2913	3124	2163
g1787.t1	9001	9195	9531	9424	9758	9777	4666	6044	4283
g1789.t1	75	54	79	130	121	104	41	57	90
g1789.t2	15	34	0	0	39	0	32	13	13
g1788.t1	5179	5366	5190	5553	5286	5575	2643	3200	6055
g1791.t1	546	613	699	609	700	712	373	461	364
g1792.t1	1367	1345	1311	1424	1259	1282	645	802	602
g1793.t1	437	421	390	460	449	546	603	595	612
g1795.t1	259	301	273	242	238	305	114	153	145
g1799.t1	19	15	11	15	11	0	19	15	0
g1798.t1	247	259	195	183	146	190	248	310	408
g1797.t1	1904	1901	1957	2173	1788	2084	736	772	750
g1802.t1	0	0	0	0	0	0	0	0	0
g1800.t1	3989	4288	4650	4250	4499	4082	1875	2567	5441
g1801.t1	319	324	364	343	265	342	290	362	300
g1804.t1	6981	7515	7377	6309	6451	6561	5181	6036	4997
g1806.t1	1206	1213	1302	1226	1197	1365	580	746	855
g1808.t1	1608	1778	1655	1398	1547	1550	938	1276	1799
g1809.t1	2516	2258	2670	2840	2557	2741	1269	1515	1213
g1811.t1	913	900	822	894	904	1047	401	499	592
g1813.t1	192	226	217	136	194	229	102	188	197
g1812.t1	482	463	460	474	504	344	75	112	78
g1812.t2	412	404	309	375	428	633	48	33	95
g1812.t3	404	517	324	354	593	542	63	43	126
g1812.t5	428	578	477	478	661	360	103	155	111
g1812.t4	257	0	438	408	0	470	0	0	0
g1815.t1	1018	945	1015	1024	1125	1123	624	704	542
g1817.t1	3019	3266	3117	3336	2970	3320	2121	2504	2246
g1818.t1	1818	1671	1565	1889	1767	1927	738	893	591
g1824.t1	43	93	37	0	0	0	191	188	290
g1823.t1	2419	2128	2366	2367	2424	2429	1656	1999	1592
g1825.t1	1349	1295	1391	1393	1287	1447	805	928	1044
g1827.t1	931	875	719	783	852	854	474	490	871
g1828.t1	426	414	356	282	313	316	333	390	179
g1829.t1	640	625	703	566	621	672	670	771	925
g1831.t1	1115	1180	1144	1254	1196	1205	881	891	697
g1832.t1	1437	1373	1501	1366	1385	1612	661	844	836
g1835.t1	1194	1225	1150	996	1141	1172	654	797	1928
g1843.t1	48	0	39	0	0	0	0	46	0
g1838.t1	0	0	0	0	245	0	0	0	0
g1837.t1	1666	1419	1591	1663	1594	1474	1004	1098	1118
g1838.t2	2356	2528	2644	2207	1740	2104	1280	1135	1747
g1839.t1	1126	1255	1219	1106	1080	1067	703	874	1560
g1840.t1	66	61	59	104	69	94	29	23	96
g1845.t1	2252	2175	2338	2235	2264	2544	1202	1663	1908
g1847.t1	466	406	436	640	608	614	182	219	318
g1849.t1	69	38	30	75	104	89	55	63	35
g1852.t1	1155	1191	1203	1392	1170	1265	744	830	810
g1855.t1	423	434	402	456	465	544	364	457	620
g1856.t1	410	418	447	402	444	447	225	243	529
g1857.t1	650	577	657	563	546	646	500	520	429
g1859.t1	151	167	126	126	108	119	99	120	118
g1861.t1	573	647	561	604	511	641	785	957	1613
g1862.t1	529	496	571	529	530	511	234	291	411
g1863.t1	358	286	327	306	346	316	268	271	364
g1865.t2	0	0	0	0	0	0	0	0	0
g1865.t1	1340	1490	1420	1556	1682	1580	730	797	1529
g1869.t1	440	411	512	510	425	437	182	377	66
g1869.t2	436	563	510	443	519	493	308	216	453
g1871.t1	919	887	1043	1111	1121	1232	1850	1990	2108
g1872.t1	2573	2214	2626	2702	2535	2615	2015	2242	2084
g1875.t1	407	374	383	376	402	540	86	119	63
g1873.t1	5987	5309	5751	5163	5254	5602	4534	5333	6508
g1877.t1	97	90	90	92	88	92	406	442	246
g1880.t1	37	68	59	30	26	39	38	34	45
g1878.t1	205	187	244	137	178	124	483	420	679
g1882.t1	592	623	582	549	572	536	354	424	616
g1876.t1	4975	5071	5100	5497	5436	5514	3184	3386	2870
g1884.t1	100	104	86	127	82	114	206	229	172
g1883.t1	2629	2666	2725	2463	2818	2507	1580	2056	1778
g1885.t1	397	378	382	456	411	362	127	168	555
g1887.t1	751	818	718	655	674	722	411	456	674
g1888.t1	876	896	875	850	1023	855	492	524	1405
g1894.t1	125	130	127	121	145	151	162	225	198
g1890.t1	1219	1212	1199	1275	1246	1169	721	897	960
g1895.t1	513	504	529	491	501	576	337	530	367
g1896.t1	252	225	241	224	193	275	141	159	379
g1897.t1	1407	1315	1450	1337	1242	1290	737	1037	1183
g1899.t1	443	492	426	581	582	558	226	262	474
g1900.t1	384	320	358	408	503	425	274	313	296
g1902.t1	487	533	466	521	515	502	227	271	275
g1903.t1	745	762	806	717	710	797	457	478	1125
g1905.t1	831	888	939	792	860	750	568	683	939
g1906.t1	182	133	189	200	232	256	114	127	251
g1904.t1	5107	5123	5532	5402	5268	5592	2709	3211	2186
g1908.t2	0	238	0	0	0	0	0	966	0
g1908.t1	1865	1586	2022	1724	1745	1781	1220	793	1155
g1908.t3	23	248	157	75	202	0	45	0	0
g1912.t1	134	106	124	65	93	124	112	105	385
g1913.t1	439	428	480	498	431	512	207	310	297
g1910.t1	11468	10526	11863	10604	10592	10472	5350	6589	7773
g1921.t1	47	48	49	44	45	37	0	0	0
g1922.t1	33	45	45	28	54	32	18	26	40
g1917.t1	3231	3402	3454	3261	2928	3270	2342	2935	3369
g1924.t1	21	0	18	8	0	13	7	7	0
g1923.t1	1087	904	936	956	1025	937	588	671	455
g1929.t1	480	547	473	477	508	580	247	289	612
g1930.t1	929	894	1024	1077	1136	1135	661	729	992
g1931.t1	2968	2713	3041	3117	3153	3050	1851	2229	1959
g1933.t1	0	0	0	813	493	342	0	0	0
g1933.t2	1823	1486	1793	1217	1444	1522	796	894	1343
g1934.t1	357	320	340	258	417	358	155	216	153
g1934.t2	348	329	328	398	354	338	221	190	342
g1936.t1	961	959	899	1127	988	1063	445	466	852
g1938.t1	711	689	730	749	701	630	293	404	313
g1941.t1	1561	1722	1633	1325	1295	1415	1462	1577	1450
g1942.t1	3079	2945	3084	3031	3030	2964	1694	1815	3161
g1944.t1	0	0	0	0	0	0	0	0	0
g1943.t1	5968	6548	6497	5466	5399	5675	4438	5599	3867
g1948.t1	1747	1751	1855	1880	1623	1710	1374	1581	1974
g1949.t1	945	1015	893	916	837	903	689	791	1322
g1950.t1	669	782	809	721	739	784	688	701	625
g1951.t1	17	12	0	13	0	0	0	13	0
g1953.t1	1208	1349	1117	1217	1054	1523	739	777	726
g1954.t1	1177	1098	1320	1197	1151	1255	814	926	607
g1958.t1	225	197	168	216	175	211	139	131	210
g1964.t1	26	35	37	32	0	0	52	31	83
g1963.t2	358	350	306	405	365	384	202	266	187
g1963.t1	261	307	417	331	313	342	203	229	213
g1967.t1	45	31	44	29	34	34	0	0	0
g1965.t1	1346	1374	1480	1427	1311	1552	747	949	1008
g1968.t1	73	0	99	72	86	47	0	0	0
g1969.t1	66	58	47	122	87	43	30	43	67
g1972.t2	2204	2181	2066	1920	2194	2072	1453	1541	1723
g1972.t1	672	604	791	1177	991	1123	0	346	0
g1974.t1	798	731	768	787	787	749	409	452	830
g1975.t1	1416	1431	1501	1573	1584	1568	693	966	929
g1980.t1	1187	1212	1147	982	1050	965	881	1101	619
g1981.t1	381	335	365	404	363	393	117	100	269
g1982.t1	752	747	789	719	694	771	410	543	652
g1983.t1	44	72	43	71	71	83	35	32	38
g1985.t1	3137	3516	3270	3229	3359	3444	1827	2211	2599
g1988.t1	986	844	877	1052	907	978	656	634	580
g1989.t1	947	845	854	1050	1066	1166	732	810	646
g1991.t1	321	338	333	329	284	331	189	259	145
g1993.t1	135	197	141	175	164	152	140	153	400
g1996.t1	58	53	69	68	70	64	38	36	80
g1997.t1	1822	1949	1955	2041	2049	2088	967	1062	1359
g1999.t1	99	89	94	93	71	106	21	32	26
g2000.t1	3330	3295	3486	3141	2868	3242	3103	3591	2216
g2001.t1	2213	2217	2214	2110	2019	2108	1102	1339	2023
g2002.t1	759	891	761	734	768	750	537	596	804
g2006.t1	12	11	32	21	27	30	0	12	0
g2007.t1	27	35	27	0	24	60	0	0	0
g2003.t1	660	647	622	678	604	699	375	419	329
g2009.t1	424	357	310	372	350	324	282	392	498
g2011.t1	1922	1783	1971	2289	2194	2128	1305	1447	1509
g2015.t1	194	243	244	217	216	269	117	182	265
g2012.t1	1160	1158	1204	1103	1188	1154	714	748	874
g2022.t1	18	41	30	54	45	32	37	46	52
g2019.t1	237	218	197	213	211	227	167	191	235
g2028.t1	19	0	23	28	19	13	0	0	0
g2025.t1	340	290	363	474	310	275	239	230	274
g2023.t1	2453	2526	2765	3198	3318	3360	1552	1944	2208
g2029.t1	0	0	0	0	0	0	0	0	0
g2030.t1	1520	1452	1466	1422	1426	1673	814	860	1342
g2032.t1	616	683	715	866	845	798	474	587	967
g2033.t1	196	199	164	258	218	243	69	96	192
g2034.t1	78	65	81	45	47	83	134	160	103
g2038.t1	736	779	810	1160	1146	1213	257	211	326
g2045.t1	91	85	169	112	167	88	66	81	100
g2046.t1	447	613	418	601	606	641	822	720	542
g2047.t1	533	632	581	525	552	594	378	445	423
g2049.t1	151	170	208	280	301	284	163	373	191
g2048.t1	1124	1195	1338	1192	1226	1314	548	752	664
g2050.t1	2016	2041	2148	2075	2166	2171	1297	1369	1084
g2051.t1	1104	1258	1138	1099	1171	1193	502	681	837
g2054.t1	126	189	165	189	127	105	116	136	131
g2053.t1	481	512	496	552	451	390	271	306	209
g2055.t1	170	107	123	81	123	128	138	108	131
g2058.t1	94	105	88	118	74	124	40	51	38
g2062.t1	1475	1381	1636	1461	1486	1669	3806	4752	3962
g2057.t2	5204	4109	4576	5432	5016	5046	3921	4696	5545
g2057.t1	4233	4409	4379	4503	4492	4302	3915	4676	5477
g2064.t1	2025	2026	1974	2085	2087	2156	1390	1847	2015
g2065.t1	1313	1447	1205	1438	1377	1374	831	954	774
g2069.t1	0	0	0	0	0	0	0	0	0
g2071.t1	32	14	36	21	31	38	23	21	28
g2068.t1	1809	1670	1924	1782	1643	1818	904	1052	950
g2072.t1	331	347	295	377	299	353	275	323	343
g2074.t1	0	0	0	0	0	0	0	0	0
g2075.t1	132	149	137	110	91	88	157	158	96
g2076.t1	63	23	44	31	40	31	59	55	48
g2079.t1	38	0	0	0	0	0	0	0	0
g2078.t1	227	182	165	108	140	108	253	285	190
g2077.t1	5599	6425	6306	5745	6103	6473	3851	4342	2810
g2080.t1	1181	1235	1124	1059	1107	1190	575	682	679
g2082.t1	408	502	449	397	470	421	310	371	353
g2087.t1	225	193	204	201	203	233	86	130	170
g2088.t1	6191	6866	6083	5076	5053	5099	4549	4804	7113
g2089.t1	1275	1240	1257	1230	1213	1317	540	617	576
g2098.t1	29	28	15	21	38	23	21	38	43
g2096.t1	184	191	155	144	167	168	91	125	131
g2100.t1	115	120	159	153	158	125	766	790	621
g2090.t1	3262	3004	3022	3250	3121	3263	1740	1864	1969
g2091.t1	545	592	534	597	617	557	310	300	464
g2092.t1	2482	3032	2907	3101	3165	3221	1632	1813	1256
g2105.t1	1910	1899	2145	1829	1970	1979	1543	1988	3303
g2107.t1	21	30	14	28	23	25	14	26	53
g2106.t1	750	881	808	842	798	789	181	143	278
g2108.t1	214	198	162	267	267	230	87	118	197
g2110.t1	287	251	207	178	175	202	121	180	182
g2111.t1	7348	7526	7857	6920	7057	7130	4326	5231	6569
g2115.t2	0	0	0	0	0	0	0	0	0
g2115.t1	0	0	0	0	0	0	0	0	0
g2114.t1	1378	1518	1402	1065	1098	1022	1105	1137	1350
g2120.t1	15	0	14	16	28	18	42	54	20
g2119.t1	144	231	214	190	146	202	131	125	123
g2118.t1	4652	5014	5011	4984	5085	5262	2569	3140	5379
g2121.t1	202	186	266	248	239	265	121	126	121
g2122.t2	1236	1085	1184	1161	1059	1339	638	665	762
g2122.t1	189	393	265	433	450	387	184	372	338
g2125.t1	39	15	21	28	13	28	29	19	21
g2123.t1	529	570	579	477	425	516	393	372	492
g2127.t1	2134	2160	2238	2428	2531	2530	600	751	926
g2128.t1	576	539	522	552	682	622	414	390	395
g2128.t3	299	347	337	224	555	300	268	269	305
g2128.t2	249	326	276	274	0	269	266	304	402
g2132.t1	173	190	270	171	136	222	101	166	99
g2129.t1	6039	6657	6354	5383	5543	5498	5931	7063	5330
g2133.t1	1263	1299	1338	1500	1507	1527	523	617	491
g2134.t1	1424	1301	1364	1700	1480	1712	427	515	272
g2136.t1	414	444	510	526	488	505	249	301	449
g2139.t1	209	258	173	202	228	311	191	247	270
g2139.t2	12	0	0	25	0	0	18	0	0
g2143.t1	0	0	0	0	0	0	0	0	0
g2140.t1	928	924	1064	1078	1079	1181	561	621	433
g2146.t1	75	83	71	54	94	103	58	54	38
g2150.t1	53	59	97	115	146	149	211	252	106
g2151.t1	69	59	52	77	65	77	0	0	84
g2152.t1	32	36	24	26	52	47	6	8	27
g2149.t1	861	883	887	807	933	994	586	589	580
g2155.t1	1689	1713	1915	1836	1738	1962	1040	1322	1539
g2157.t1	1650	1572	1643	1585	1563	1548	840	1079	979
g2160.t1	0	0	0	0	0	0	0	0	0
g2159.t1	4652	4676	4720	3479	3470	3249	3371	3892	4150
g2165.t1	27	37	64	41	60	47	23	27	22
g2166.t1	212	136	221	92	176	109	164	153	92
g2164.t1	1887	1890	1951	1983	1859	2196	1127	1480	812
g2167.t1	2193	2400	2301	2017	2139	2131	1158	1351	895
g2170.t1	79	95	91	93	89	69	32	32	128
g2169.t1	723	648	795	779	737	706	441	499	487
g2171.t1	338	303	273	360	449	341	153	132	238
g2172.t1	958	846	889	1003	961	1011	388	505	821
g2173.t1	1502	1490	1408	1490	1469	1592	848	948	1103
g2175.t1	180	198	203	197	168	204	88	88	145
g2174.t1	1414	1231	1358	1243	1327	1289	1491	1816	1512
g2178.t1	2669	2990	2870	2341	2270	2815	2508	2808	2113
g2179.t1	1541	1824	1784	1746	1664	1803	1093	1413	1376
g2181.t1	59	50	66	129	88	113	34	35	33
g2180.t2	522	582	522	570	584	600	426	583	390
g2180.t1	81	0	0	0	0	0	0	0	0
g2183.t1	605	676	619	678	662	711	428	522	370
g2191.t1	23	0	0	0	0	0	0	0	0
g2193.t1	41	45	45	16	38	59	69	91	52
g2196.t1	932	941	1080	925	964	968	573	657	640
g2199.t1	43	50	43	82	47	41	18	20	44
g2198.t1	986	827	903	1020	1048	1163	1992	2173	2883
g2200.t1	340	333	297	214	242	255	146	194	261
g2202.t1	635	473	570	376	515	439	414	424	503
g2205.t1	454	501	520	624	409	638	235	253	395
g2205.t2	280	377	243	190	417	204	161	246	110
g2208.t1	0	0	0	0	0	0	0	0	0
g2206.t1	508	659	606	516	587	546	355	434	460
g2210.t1	736	715	731	868	887	824	636	800	669
g2211.t1	78	86	76	87	130	93	68	81	106
g2214.t1	16	24	10	11	13	6	8	0	0
g2213.t1	175	195	198	134	187	212	202	245	191
g2204.t1	13015	14034	14003	15568	15468	16046	5219	6207	4780
g2216.t1	153	87	130	115	120	103	92	146	135
g2217.t1	149	196	198	180	162	201	195	283	154
g2219.t1	41	37	32	27	39	32	9	16	78
g2221.t1	19394	23512	21803	35554	28788	29258	7960	9194	9243
g2221.t2	5985	1028	4363	3816	9889	10495	1900	2088	3008
g2227.t1	1371	1375	1606	951	1101	987	411	606	632
g2228.t1	1870	2057	2079	2113	2210	2134	919	1063	1019
g2233.t1	1315	1249	1395	1368	1356	1406	870	950	812
g2235.t1	378	352	402	408	406	470	675	766	760
g2222.t1	36362	35438	37579	47153	46161	46635	20991	25292	24404
g2236.t1	1115	1126	1189	1103	986	1190	599	814	559
g2240.t1	46	29	25	58	57	35	14	31	11
g2241.t1	65	80	67	67	81	80	43	43	62
g2239.t1	2363	2457	2421	2530	2214	2350	1028	1369	1742
g2246.t1	382	379	351	327	292	337	189	284	204
g2248.t1	53	90	77	47	77	51	37	43	34
g2249.t1	220	206	238	244	255	207	229	255	329
g2252.t1	356	406	409	204	155	220	137	180	287
g2253.t1	121	107	140	119	107	154	72	61	119
g2255.t1	208	269	217	267	306	293	350	406	573
g2256.t1	2781	2916	2813	2889	2987	3316	1642	1782	1160
g2259.t1	14	19	11	12	20	18	7	7	13
g2257.t1	1321	1652	1495	1385	1337	1401	928	1120	1321
g2260.t1	672	839	692	746	760	892	703	763	667
g2266.t1	68	64	63	125	78	91	122	145	172
g2268.t1	90	101	105	61	111	74	48	69	49
g2267.t1	154	242	197	225	288	229	247	267	245
g2264.t1	3246	3957	3524	3267	3428	3260	1509	1669	2201
g2270.t1	74	79	68	99	84	97	37	37	48
g2272.t1	23	17	25	62	26	60	65	42	50
g2269.t1	3687	3352	3642	3919	3688	3985	2957	3762	2015
g2273.t1	826	881	916	831	796	988	695	999	1072
g2274.t1	4018	4170	4461	3396	3377	3483	2612	3247	2474
g2278.t1	832	832	925	871	759	925	589	686	400
g2279.t1	1266	1272	1462	1316	1312	1320	874	1031	969
g2280.t1	1208	1349	1299	1210	1238	1377	853	1065	1086
g2290.t1	772	807	786	784	863	818	432	563	355
g2292.t1	2132	2103	2003	2293	2243	2224	854	1063	1348
g2293.t1	165	120	179	148	138	242	150	125	163
g2296.t1	2556	2776	2485	2758	2381	2654	1202	1350	1675
g2298.t1	382	220	251	393	473	439	353	449	274
g2297.t1	5518	5760	5757	5862	6312	6157	1493	1732	2768
g2299.t1	8628	10021	9160	8483	8965	9144	7122	8249	4285
g2303.t1	13	0	7	0	0	7	0	0	11
g2302.t1	989	877	970	911	785	896	750	768	402
g2301.t1	11381	12119	11800	10755	10609	11124	7829	9166	6025
g2305.t1	372	320	275	338	406	331	153	197	207
g2306.t1	88	91	89	125	172	140	397	333	207
g2307.t1	177	193	199	266	200	170	143	127	90
g2309.t1	626	792	714	697	679	715	462	653	649
g2312.t1	257	279	257	497	667	561	170	215	295
g2315.t1	274	304	333	319	317	306	167	154	323
g2314.t1	2705	2798	2801	2888	2526	2828	1460	1752	2065
g2319.t1	173	231	251	217	229	322	140	111	109
g2320.t1	28	0	27	41	27	40	0	0	0
g2324.t1	1709	1759	1825	1512	1584	1788	1400	1889	1961
g2327.t1	1683	1428	1624	1804	1436	1515	834	1057	731
g2328.t1	539	601	400	720	686	737	251	266	202
g2329.t1	315	283	348	213	227	217	112	144	259
g2333.t1	17	25	19	21	22	18	41	67	28
g2331.t1	955	992	846	928	907	1073	519	574	581
g2332.t1	163	180	182	188	234	244	93	91	234
g2334.t1	115	123	65	114	136	178	121	112	140
g2336.t1	1296	1315	1408	1323	1475	1516	3250	4172	2276
g2337.t1	2001	1791	1889	2115	1895	2172	1491	1956	1137
g2338.t1	730	700	734	768	792	753	434	587	601
g2339.t1	517	485	455	520	404	468	320	316	242
g2340.t1	104	175	128	83	64	139	75	79	64
g2341.t1	2721	2901	2859	3222	3411	3376	1546	1788	2058
g2342.t1	880	843	827	890	934	979	524	684	1594
g2343.t1	704	682	707	472	539	455	463	502	574
g2345.t1	200	148	138	173	163	181	98	112	119
g2347.t1	386	351	446	384	313	402	220	276	233
g2348.t1	156	98	137	164	166	145	179	286	184
g2349.t1	221	184	225	166	163	216	526	555	322
g2350.t1	420	493	534	637	504	552	313	291	433
g2352.t1	749	829	794	756	773	877	380	504	568
g2353.t1	299	324	331	323	331	307	179	182	210
g2355.t1	141	110	100	104	82	134	84	84	111
g2359.t1	181	152	194	190	164	183	188	223	257
g2360.t1	8033	7649	8178	8650	8065	8540	3230	3911	2602
g2362.t1	1165	1200	1126	1093	1151	1195	712	853	455
g2363.t1	307	218	250	253	200	211	148	184	120
g2366.t1	443	320	440	436	421	357	213	196	209
g2368.t1	2078	1923	2170	2211	2088	2087	898	1002	1537
g2370.t1	427	396	418	292	339	311	414	507	914
g2369.t1	3791	4400	4115	4008	3751	4378	2162	2624	1803
g2371.t1	1821	1983	2317	2444	2632	2583	3471	3863	4518
g2375.t1	244	228	265	239	240	321	116	147	251
g2375.t2	129	125	116	84	103	59	29	92	0
g2377.t1	151	129	105	118	107	146	64	136	44
g2379.t1	13664	14208	14375	12486	12205	13247	7830	9468	12705
g2380.t1	298	244	333	322	308	290	151	180	320
g2382.t1	495	558	485	550	534	522	238	313	437
g2386.t1	93	144	86	146	155	191	77	94	68
g2385.t1	3868	4093	3963	4134	3866	4086	1315	1631	1081
g2388.t1	314	332	322	314	384	350	532	640	630
g2387.t1	5113	4983	4964	5942	5281	5739	3233	3986	2469
g2389.t1	936	1146	1033	1119	904	1085	727	898	779
g2390.t1	802	878	765	1139	1261	1223	236	190	225
g2391.t1	1512	1817	1581	1471	1614	1628	642	558	417
g2393.t1	87	127	112	118	120	94	132	166	142
g2392.t1	3576	3788	3773	3611	3424	3783	1769	1893	1394
g2394.t1	1850	2021	1930	1853	2065	2378	1993	2203	1178
g2399.t1	130	126	120	241	150	152	110	174	176
g2400.t1	162	103	157	148	162	132	192	283	77
g2396.t1	2159	2225	2371	2456	2406	2662	886	921	828
g2403.t1	712	560	716	766	930	722	360	698	782
g2404.t1	2439	3055	2868	5617	5885	5212	2378	3460	5075
g2407.t1	118	153	101	206	266	210	30	32	58
g2408.t1	5233	5897	5369	8373	8427	8905	2931	3113	3774
g2409.t1	52	101	43	58	96	51	60	65	110
g2412.t1	469	402	447	515	489	517	252	302	315
g2411.t2	886	963	304	281	941	672	792	907	138
g2411.t1	867	703	1574	1431	914	1101	759	831	1028
g2414.t1	402	423	453	349	328	397	187	221	205
g2415.t1	193	211	184	188	318	300	373	469	275
g2413.t1	3408	3578	3611	3518	3626	3605	2692	3258	2260
g2416.t1	877	722	922	943	739	857	542	566	598
g2418.t1	427	433	404	460	484	435	480	365	410
g2419.t1	16	12	7	0	0	0	0	0	0
g2422.t1	286	288	325	286	309	265	142	109	150
g2424.t1	7	0	7	14	0	0	0	0	6
g2423.t1	152	219	172	199	197	238	40	56	72
g2425.t1	17	0	18	16	16	0	0	0	0
g2427.t1	62	60	72	215	158	209	72	39	82
g2426.t1	4941	4186	4602	5338	5023	5131	1363	1792	2774
g2429.t1	35	52	57	47	75	67	35	40	122
g2431.t1	0	11	0	0	0	0	0	0	0
g2430.t1	103	135	144	166	210	157	98	75	162
g2433.t3	0	168	145	276	342	0	37	96	88
g2433.t1	320	225	314	382	277	320	111	158	116
g2433.t2	291	182	308	228	273	487	75	93	86
g2436.t1	260	281	246	358	322	419	97	85	53
g2438.t1	0	0	0	0	8	0	0	0	0
g2437.t1	397	370	427	510	379	414	203	219	221
g2442.t1	225	241	221	192	286	252	141	182	137
g2443.t1	152	106	129	197	118	180	56	68	103
g2444.t1	657	675	626	559	623	529	395	440	1300
g2446.t1	268	307	248	373	357	308	53	51	113
g2448.t1	35	58	42	53	52	35	38	37	31
g2449.t2	0	54	0	0	0	0	0	0	0
g2449.t1	95	0	128	231	165	206	35	42	107
g2450.t1	3052	3131	3045	3693	3455	3806	2159	2679	2774
g2451.t1	236	251	241	273	213	244	134	169	160
g2452.t1	233	223	245	196	194	190	56	138	95
g2453.t1	334	427	285	293	316	465	208	242	221
g2454.t1	695	603	571	788	686	725	252	193	178
g2455.t1	41	90	75	80	105	56	43	54	54
g2456.t1	296	338	279	403	409	398	210	193	283
g2461.t1	113	122	115	139	127	135	60	103	79
g2462.t1	65	89	107	85	68	60	59	95	74
g2463.t1	2237	2094	2051	2140	2031	2177	1581	2083	1649
g2465.t1	1125	1040	1109	1206	1008	1137	619	718	593
g2466.t1	1467	1684	1477	1337	1272	1402	969	1126	824
g2467.t1	972	766	749	769	859	899	2327	2396	1668
g2470.t1	1508	1535	1444	1462	1439	1585	925	1018	975
g2472.t1	1918	1791	1956	1960	1900	2009	982	1343	2395
g2473.t1	627	661	635	682	688	738	308	444	282
g2477.t1	67	73	125	96	67	100	59	63	102
g2478.t1	19	42	37	34	25	47	17	10	7
g2481.t2	1238	1367	1259	1297	1442	1394	742	880	659
g2482.t1	1796	1901	1791	1912	1821	1861	883	1038	1169
g2486.t1	3256	3317	3631	3471	3522	3804	8601	10384	8965
g2487.t1	892	969	961	1061	985	999	524	641	712
g2489.t1	417	418	416	502	487	469	560	682	340
g2493.t1	220	178	330	303	356	346	70	121	80
g2494.t1	214	215	207	235	308	284	254	313	311
g2498.t1	171	171	148	175	146	194	71	80	105
g2497.t1	858	861	927	942	1083	1084	622	681	840
g2502.t1	56	41	64	63	76	59	0	0	46
g2501.t1	5556	5344	5921	5654	5665	5640	4897	6007	8084
g2503.t1	2125	2157	2043	2663	2779	2751	388	495	525
g2505.t1	226	148	212	217	284	249	163	222	212
g2507.t1	203	306	215	276	290	271	502	505	172
g2506.t1	2047	2114	2061	1350	1303	1363	1479	1401	1685
g2509.t1	21	27	27	17	20	27	13	19	41
g2510.t1	0	0	0	0	0	0	0	0	0
g2511.t1	47	35	45	42	39	48	35	28	27
g2514.t1	1350	1183	1349	1181	1078	1205	678	845	673
g2516.t1	135	116	80	120	93	140	78	81	54
g2518.t1	67	37	40	47	46	42	54	39	43
g2519.t1	0	0	0	0	0	0	0	0	0
g2521.t1	654	621	704	769	705	719	372	490	565
g2522.t1	1903	1856	2143	2058	1860	2014	2031	2375	2697
g2523.t1	118	143	162	141	118	111	99	82	140
g2525.t1	1042	1047	1060	1129	984	990	1997	2182	2937
g2526.t1	1286	1327	1339	1567	1459	1409	871	907	902
g2528.t1	1822	1967	2040	1515	1710	1509	1065	1373	4413
g2530.t1	585	636	644	580	576	662	296	263	664
g2531.t1	612	646	645	741	731	794	187	393	385
g2532.t1	337	312	340	309	362	364	574	596	561
g2533.t1	129	104	120	127	109	120	94	83	147
g2534.t2	205	178	179	200	176	158	168	167	260
g2534.t1	54	121	109	132	135	142	85	99	42
g2535.t1	661	688	705	669	710	698	528	576	605
g2537.t1	325	345	351	343	413	350	104	182	297
g2538.t1	21	31	25	61	89	64	31	21	52
g2540.t1	292	347	328	222	194	244	616	634	1058
g2541.t1	62	83	119	75	86	127	131	106	70
g2544.t1	18	0	0	0	0	0	0	0	0
g2542.t1	789	787	844	737	715	863	343	315	636
g2546.t1	133	110	141	74	115	129	52	78	45
g2545.t1	8699	9543	8911	9448	8961	9373	4390	4632	5486
g2547.t1	8270	8109	8581	7906	7611	8102	5397	6487	3602
g2548.t1	936	975	1006	1146	1076	1114	1286	1611	1362
g2550.t1	841	976	805	909	996	1184	462	591	718
g2549.t1	5442	6052	6084	5202	5405	5329	3042	3642	2395
g2552.t1	4424	4257	4487	4541	4507	4760	2464	2878	3190
g2554.t1	63	74	67	128	75	103	87	51	95
g2557.t1	907	994	1083	1252	1179	1198	567	831	944
g2558.t1	583	659	658	720	802	874	311	379	841
g2559.t1	239	276	262	258	253	307	138	165	210
g2563.t1	9	0	11	14	13	0	0	0	0
g2562.t1	123	163	184	143	145	141	124	118	149
g2560.t1	1038	1199	1036	1029	1039	1035	795	1112	994
g2564.t1	430	401	379	444	446	498	752	881	690
g2566.t1	761	818	727	1344	1469	1545	503	572	1199
g2569.t1	245	253	290	232	218	222	147	176	135
g2570.t1	1146	1144	1132	1224	936	1107	480	574	593
g2571.t1	4784	5844	4623	3877	4109	4534	4627	4237	5013
g2573.t1	25	46	48	46	45	33	10	12	37
g2574.t1	51	56	32	42	19	53	33	37	46
g2572.t1	1477	1598	1702	1642	1707	1758	887	923	866
g2578.t1	1018	993	1043	1048	896	986	550	668	528
g2583.t1	49	52	56	26	28	0	34	23	60
g2585.t1	69	108	88	98	81	120	24	31	20
g2579.t1	12752	11085	12312	15941	16506	17638	34621	42390	23978
g2586.t1	1154	1331	1055	1143	1152	1291	457	478	457
g2587.t1	3825	4461	4315	4289	4198	4797	2426	2832	2280
g2591.t1	75	83	59	129	114	68	50	84	67
g2590.t1	905	1061	891	966	913	903	505	616	576
g2594.t1	133	101	112	144	94	136	250	201	153
g2595.t1	74	100	80	101	118	118	337	374	235
g2589.t1	14804	15653	14476	13436	13161	13963	8797	10578	8476
g2597.t1	75	71	42	99	68	86	42	52	31
g2596.t1	8508	9070	9023	8751	8285	9115	4877	5693	5142
g2598.t1	3294	3313	3351	3662	3586	3707	1689	2143	2319
g2599.t1	214	204	196	232	219	187	242	261	232
g2601.t1	1065	1106	1087	1206	1212	1339	1958	2307	1879
g2602.t1	2200	2325	2333	2495	2484	2655	2074	2204	2193
g2603.t1	577	592	615	545	695	693	345	345	330
g2606.t1	229	307	236	365	265	246	158	200	194
g2606.t2	219	125	168	45	189	164	80	70	143
g2608.t1	474	421	418	481	449	565	237	283	122
g2609.t1	642	699	762	757	604	703	426	425	625
g2611.t1	52	66	86	64	40	86	58	33	37
g2610.t1	1022	1097	956	1190	1020	1100	540	620	831
g2614.t1	370	343	238	498	519	542	88	156	144
g2615.t1	515	539	419	585	491	580	244	265	245
g2616.t1	356	420	382	430	388	543	97	121	191
g2618.t1	23	25	28	11	15	12	14	16	17
g2617.t1	333	365	342	383	375	503	247	269	186
g2622.t1	0	12	0	12	12	0	0	0	0
g2621.t1	114	249	147	164	146	188	79	44	80
g2620.t1	1587	1469	1544	1524	1583	1550	1030	1253	1508
g2623.t1	343	346	388	340	399	387	248	207	340
g2625.t1	187	221	167	145	146	193	89	106	103
g2626.t1	465	571	481	487	487	550	246	273	307
g2628.t1	168	126	164	219	116	158	42	50	46
g2627.t1	1021	904	1198	1072	1110	1048	584	748	787
g2629.t1	574	553	526	644	625	585	807	1013	1086
g2631.t1	152	115	112	67	57	72	83	81	55
g2632.t1	900	931	1001	1506	1397	1435	281	286	371
g2633.t1	343	340	371	463	398	404	57	47	58
g2634.t1	1007	1200	1108	1038	1020	1006	317	365	557
g2638.t1	15	27	17	21	16	14	33	37	15
g2636.t1	2538	2737	2688	2470	2523	2906	1615	1890	1433
g2641.t1	27	39	34	40	45	35	21	21	47
g2640.t1	1113	1207	1180	1350	1401	1414	1146	1332	1128
g2643.t1	100	106	63	143	107	130	0	61	38
g2642.t1	285	277	266	274	273	318	392	399	385
g2646.t1	154	161	190	128	110	75	127	186	141
g2646.t2	92	88	44	36	61	61	58	33	0
g2647.t1	134	126	107	112	82	141	103	83	95
g2648.t1	78	35	72	48	38	72	26	21	36
g2649.t1	380	445	375	405	474	444	246	359	309
g2651.t1	0	0	0	0	0	0	0	0	0
g2650.t1	381	397	347	391	398	512	271	326	232
g2654.t1	1892	1802	2127	1935	1974	2026	802	911	796
g2657.t1	740	720	679	879	852	963	271	279	307
g2656.t2	4701	4746	4721	4001	4159	4294	3316	3768	2833
g2656.t1	3503	3753	3597	3071	3091	3272	2478	2958	1841
g2658.t1	313	295	305	243	286	353	658	827	382
g2661.t1	25	49	49	29	54	50	28	18	0
g2659.t1	214	189	220	265	258	261	84	111	171
g2660.t1	323	255	297	318	301	286	148	172	224
g2662.t1	24	26	22	41	36	25	0	25	14
g2668.t1	0	0	0	0	0	0	0	0	0
g2669.t1	13	5	0	0	17	12	0	0	0
g2665.t1	1255	1105	1142	1237	1283	1144	608	623	885
g2670.t1	125	126	90	118	166	127	167	163	197
g2672.t1	43	33	41	28	43	66	68	65	99
g2673.t1	73	60	70	65	69	98	58	78	42
g2671.t1	400	375	367	347	367	352	731	870	912
g2674.t1	94	88	84	75	69	41	67	94	58
g2675.t1	177	198	152	204	185	140	59	51	83
g2676.t1	96	111	84	125	89	129	47	31	47
g2677.t1	779	1026	936	934	867	774	170	215	331
g2679.t1	285	228	292	318	259	283	494	575	416
g2678.t1	4539	4045	4307	3943	3911	3907	3401	3929	2561
g2680.t1	5928	6023	6104	6269	6177	6147	2797	3146	5006
g2683.t1	1252	1450	1416	1429	1452	1371	648	689	692
g2687.t1	46	65	76	77	92	79	20	27	23
g2684.t1	2228	2188	2268	2523	2531	2524	1662	1998	1470
g2685.t1	638	558	619	644	705	794	1063	1325	784
g2689.t1	182	185	172	130	165	107	98	153	158
g2692.t1	125	71	113	96	98	122	49	103	88
g2690.t1	1343	1696	1509	1349	1284	1245	713	844	1716
g2694.t1	0	0	0	0	0	0	0	0	0
g2693.t1	1147	1250	1457	1028	965	1034	706	983	1748
g2695.t1	383	351	392	393	299	422	205	233	150
g2698.t1	17	12	9	8	24	14	0	20	12
g2696.t1	2381	2718	2737	2291	2317	2590	1559	1960	5236
g2702.t1	239	335	229	261	321	290	200	223	114
g2703.t1	211	193	179	188	205	195	147	79	115
g2700.t1	1866	1994	1926	2252	2329	2306	1210	1497	1775
g2704.t1	295	386	319	265	211	284	256	203	338
g2705.t1	281	240	270	342	336	338	128	160	266
g2706.t1	584	620	639	630	645	752	294	370	390
g2707.t1	90	139	156	167	130	157	78	73	119
g2708.t1	883	932	1085	983	916	933	595	760	541
g2709.t1	915	1019	1114	1011	1070	1122	510	666	1232
g2710.t1	1865	2179	2080	2030	2014	2019	1048	1311	3417
g2712.t1	27	0	0	0	0	0	0	0	0
g2711.t1	3029	3054	3096	2587	2757	3029	2183	2589	1844
g2713.t1	678	861	880	722	673	799	421	504	513
g2715.t1	432	418	466	320	369	370	264	374	363
g2714.t1	4298	4021	4218	4216	4236	4144	2172	2884	3167
g2717.t1	348	375	355	475	429	426	1426	1500	1619
g2716.t1	6503	6184	6507	4388	3902	4231	2542	3050	4124
g2719.t1	5833	6481	6220	5709	5695	6211	3581	3920	2046
g2720.t1	1214	1026	1024	1182	1015	1209	1983	2239	1952
g2723.t1	1035	1137	1040	924	1054	1066	888	1143	1353
g2724.t1	46	45	40	58	36	38	38	73	45
g2726.t1	28	59	36	83	76	119	41	57	99
g2728.t1	94	102	89	147	159	179	67	112	177
g2730.t1	213	219	184	169	244	249	96	86	292
g2733.t1	251	377	276	268	303	252	187	263	144
g2735.t1	205	222	187	209	162	181	92	108	69
g2738.t1	98	94	105	117	97	97	31	81	112
g2737.t1	340	361	387	360	325	408	184	146	168
g2739.t1	1323	1307	1482	1561	1214	1423	1020	1127	983
g2742.t1	333	278	281	400	260	453	308	332	388
g2741.t1	3436	3626	3617	3561	3444	3562	2073	2519	2044
g2743.t1	381	444	384	370	365	507	203	298	327
g2744.t1	102	123	120	115	124	113	26	29	77
g2745.t1	13359	17762	14604	12028	12044	12954	5841	6982	7760
g2749.t1	404	389	362	342	344	396	250	255	485
g2750.t1	447	365	389	562	482	501	237	300	335
g2755.t1	37	44	38	59	40	33	25	29	32
g2757.t1	12	0	16	9	10	10	0	12	32
g2747.t1	7388	7727	8172	7295	7019	6982	3966	4697	5015
g2758.t1	867	818	848	672	661	649	632	624	766
g2761.t1	228	235	256	237	284	233	203	223	157
g2769.t1	0	0	0	0	0	0	0	0	0
g2770.t1	0	19	0	0	14	0	0	15	13
g2768.t1	897	1034	906	844	934	1047	652	702	546
g2762.t1	10407	10085	10854	7814	7614	8003	4817	5537	10171
g2774.t1	29	36	31	20	22	19	0	18	14
g2780.t1	66	70	86	70	98	118	65	72	148
g2778.t1	91	94	167	162	157	122	63	82	68
g2779.t1	219	179	203	236	220	179	95	102	223
g2782.t1	65	34	36	31	39	22	33	0	45
g2775.t1	5753	6116	5865	4183	4270	4662	4015	4829	3400
g2783.t1	173	122	165	184	215	177	170	139	212
g2785.t1	45	43	36	48	27	28	52	70	71
g2787.t1	1139	1018	1110	1197	1255	1297	574	586	1031
g2788.t1	744	821	720	944	719	873	469	575	543
g2789.t1	1307	1474	1361	1211	1115	1233	726	830	943
g2793.t1	10	0	9	10	0	12	0	0	0
g2794.t1	92	126	135	172	160	182	64	75	81
g2796.t1	1143	899	921	1323	1198	1102	493	575	474
g2797.t1	334	253	207	212	269	258	524	665	502
g2800.t1	87	132	90	108	85	100	49	48	187
g2801.t1	2218	2236	2468	2423	2672	2752	1127	1237	2805
g2803.t1	344	319	314	359	347	343	156	181	250
g2805.t1	0	0	0	11	0	0	0	0	0
g2810.t1	5	3	6	3	11	3	8	9	14
g2816.t1	25	11	24	50	35	10	6	28	23
g2818.t1	183	169	182	146	196	185	134	114	61
g2815.t1	1211	1077	1283	1258	1309	1248	695	809	857
g2823.t1	133	132	116	76	70	74	61	84	74
g2804.t1	75598	84003	78949	76986	78752	80578	47071	54508	69260
g2828.t1	774	819	774	728	754	757	512	606	424
g2827.t1	7049	7214	7396	7321	7134	7715	4556	5819	4059
g2831.t1	324	343	377	899	876	984	166	172	198
g2832.t1	390	478	365	440	400	465	286	291	229
g2833.t1	890	870	874	754	691	848	2197	2566	2702
g2838.t1	512	479	520	414	463	412	271	264	609
g2837.t1	2096	2060	2064	2128	1945	1839	1275	1533	1613
g2839.t1	1758	1811	1727	1977	1827	2010	729	974	981
g2843.t1	1265	1157	1296	1234	1301	1305	635	760	1000
g2845.t1	939	907	1066	972	973	1104	1479	1739	1016
g2849.t1	102	152	130	80	128	132	78	51	109
g2854.t1	523	522	577	546	599	594	171	239	130
g2857.t1	532	476	551	615	625	624	233	307	376
g2859.t1	707	683	619	744	691	736	333	380	450
g2860.t1	631	598	702	692	727	677	358	409	503
g2865.t1	25	36	31	69	65	80	21	15	21
g2861.t1	1927	1943	2009	1907	1890	1902	1376	1662	2269
g2856.t1	80163	87191	84998	83536	84930	91400	10772	12931	9922
g2867.t1	444	482	387	506	537	514	300	270	284
[truncated: 41,866 more rows]
